# Supplementary material for: Some like it hot: a differential response to changing temperatures by the malaria vectors Anopheles funestus and An. gambiae s.l
Source: PeerJ. 2017 Mar 28;5:e3099. doi: 10.7717/peerj.3099 (PMC5372839; doi:10.7717/peerj.3099)
Supplement: File S2 — Dataset from the Furvela Aid Post excluding monthly means. [file peerj-05-3099-s002.xlsx]

## Sheet: Data
Number	Sheet	Week number	Year	Month	Day	Date	ISO week	Time	Time	PIN	Years	months	approx age	Age group	babies	Sex	Temp	Fever	Days ill	control?	use net?	Residence	falciparum	Negative	f1	f2	f3	f4	f5	falciparum pos			ovale	malariae	gametocytes	count	leucocytes	transferred	haemoglobin	comments	resistant	trap
4338	185	1	2007	1	3	2007-01-03	1	10:28:00	10:28:00	7193	1			1	1	2			4			Furvela	0	1	0	0	0	0	0	0			0	0	0
4347	185	1	2007	1	4	2007-01-04	1	10:59:00	10:59:00	7312	0	11		1	1	1						Furvela	2	0	0	1	0	0	0	1			0	0	0
4348	185	1	2007	1	5	2007-01-05	1	08:45:00	08:45:00	7313	0	4		1	1	2	36.5	0	2			jogo	0	1	0	0	0	0	0	0			0	0	0
4349	185	1	2007	1	5	2007-01-05	1	08:51:00	08:51:00	7314	0	4		1	1	2	37	0	2			Furvela	0	1	0	0	0	0	0	0			0	0	0
3443	155	1	2008	1	3	2008-01-03	1	0	0.379167	7795	0	8		1	1	2	38.6	1	2			ucucho	0	1	0	0	0	0	0	0			0	0
3444	155	1	2008	1	3	2008-01-03	1	0	0.377083	7796	0	8		1	1	1	37.2	0	4			matumbela	0	1	0	0	0	0	0	0			0	0	0
3448	155	1	2008	1	4	2008-01-04	1	0	0.345833	7716	0	6		1	1	2	35.9	0	2			jogo	1	0	1	0	0	0	0	1			0	0	0
290	11	2	2004	1	7	2004-01-07	2	0	0.364583		0	6		1	1	1	35.8	0	2			Furvela	4	0	0	0	0	1	0	1			0	0	0
298	11	2	2004	1	7	2004-01-07	2	0	0.436806	4487	0	7		1	1	2	36.7	0	2			Furvela	5	0	0	0	0	0	1	1			0	0
33	2	2	2004	1	8	2004-01-08	2	0	0.442361		0	8		1	1	2	38.2	1	2			Matumbela	0	1	0	0	0	0	0	0			0	0
314	11	2	2004	1	8	2004-01-08	2	0	0.384722	1981	0	5		1	1	1	37.4	0	2		s	Matumbela	0	1	0	0	0	0	0	0			0	0
46	2	2	2004	1	9	2004-01-09	2	0	0.378472	4860	0	4		1	1	1	38	1	2			Furvela	3	0	0	0	1	0	0	1			0	0
52	2	2	2004	1	9	2004-01-09	2	0	0.420139	4576	0	7		1	1	1			3			Furvela	1	0	1	0	0	0	0	1			0	0
37	2	2	2004	1	9	2004-01-09	2	0	0.327778	4856	0	3		1	1	2	37	0	5			jogo	0	1	0	0	0	0	0	0			0	0	0
48	2	2	2004	1	9	2004-01-09	2	0	0.420833	4706	0	6		1	1	1						Furvela	4	0	0	0	0	1	0	1
4356	186	2	2007	1	8	2007-01-08	2	08:41:00	08:41:00	7317	0	3		1	1	2	36.6	0				lihuwa	3	0	0	0	1	0	0	1			0	0	0
4365	186	2	2007	1	9	2007-01-09	2	08:24:00	08:24:00	7194	0	7		1	1	1	37.8	1	2		s	jogo	0	1	0	0	0	0	0	0			0	0	0
4368	186	2	2007	1	9	2007-01-09	2	09:18:00	09:18:00	7273	0	11		1	1	2	39.6	1	2			matumbela	3	0	0	0	1	0	0	1			0	0	0
4370	186	2	2007	1	9	2007-01-09	2	09:42:00	09:42:00	7322	0	4		1	1	2	36.6	0	2			Furvela	0	1	0	0	0	0	0	0			0	0	0
4373	186	2	2007	1	9	2007-01-09	2	12:15:00	12:15:00	7323	0	5		1	1	1	38.5	1				jogo	3	0	0	0	1	0	0	1			0	0	0			hospital
4377	186	2	2007	1	10	2007-01-10	2	09:28:00	09:28:00	7324	0	5		1	1	2	37.4	0	2			jogo	2	0	0	1	0	0	0	1			0	0	0
4384	187	2	2007	1	11	2007-01-11	2	11:47:00	11:47:00	7327	0	7		1	1	2	38.2	1	1			bovane	2	0	0	1	0	0	0	1
3477	156	2	2008	1	7	2008-01-07	2	0	0.501389	7656	0	8		1	1	2			2			Furvela	1	0	1	0	0	0	0	1			0	0	0
3467	155	2	2008	1	7	2008-01-07	2	0	0.418056	7806	0	3		1	1	2						matumbela	0	1	0	0	0	0	0	0			0	0
3471	155	2	2008	1	7	2008-01-07	2	0	0.468056	7807	1			1	1	1						Furvela	0	1	0	0	0	0	0	0			0	0	0
3492	157	2	2008	1	10	2008-01-10	2	0	0.336806	7813	0	8		1	1	2	37	0	2			Furvela	1	0	1	0	0	0	0	1			0	0	0
3494	157	2	2008	1	10	2008-01-10	2	0	0.401389	7639	0	10		1	1	2			2			matumbela	4	0	0	0	0	1	0	1			0	0	0
3493	157	2	2008	1	10	2008-01-10	2	0	0.38125	7814	0	5		1	1	2			5			matumbela	1	0	1	0	0	0	0	1			0	0	0
3499	157	2	2008	1	10	2008-01-10	2	0	0.496528	7815	0	3		1	1	2						Furvela	0	1	0	0	0	0	0	0			0	0	0
3507	157	2	2008	1	11	2008-01-11	2	0	0.384722	7757	0	6		1	1	2			2			jogo	0	1	0	0	0	0	0	0			0	0
3510	157	2	2008	1	11	2008-01-11	2	0	0.468056	7818	0	3		1	1	1	37.8	1	2			hospede de RSA	1	0	1	0	0	0	0	1			0	0
3509	157	2	2008	1	11	2008-01-11	2	0	0.420139	7607	0	6		1	1	2			3			Furvela	1	0	1	0	0	0	0	1			0	0	0
257	10	2	2004	1	12	2004-01-12	3	0	0.3875	4390	0	8		1	1	1			2			Matumbela	2	0	0	1	0	0	0	1			0	0	0
263	10	2	2004	1	12	2004-01-12	3	0	0.40625	1939	0	11		1	1	1	37.7	1	2			Jogo	3	0	0	0	1	0	0	1			0	0	0
269	10	2	2004	1	12	2004-01-12	3	0	0.424306	4867	0	4		1	1	1	37.1	0	2			Furvela	0	1	0	0	0	0	0	0			0	0
274	10	2	2004	1	12	2004-01-12	3	0	0.443056	4869	0	3		1	1	1			2			Furvela	3	0	0	0	1	0	0	1			0	0	0
205	8	2	2004	1	13	2004-01-13	3	0	0.417361	4875	0	11		1	1	2	38.6	1	2			Furvela	0	1	0	0	0	0	0	0			0	0	0
207	8	2	2004	1	13	2004-01-13	3	0	0.446528	4876	0	3		1	1	1	36.3	0	2			Furvela	4	0	0	0	0	1	0	1			0	0	0
217	8	3	2004	1	14	2004-01-14	3	0	0.3875	1931	0	3		1	1	1	37.4	0	2			Vala	4	0	0	0	0	1	0	1			0	0	0
221	8	3	2004	1	14	2004-01-14	3	0	0.377778	4840	0	2		1	1	1	37.8	1	2			Jogo	1	0	1	0	0	0	0	1			0	0
212	8	3	2004	1	14	2004-01-14	3	0	0.356944	1897	1			1	1	2	39.7	1	2			Furvela	5	0	0	0	0	0	1	1			0	0	0
170	7	3	2004	1	15	2004-01-15	3	0	0.357639	4891	0	5		1	1	1	36	0	2			Jogo	0	1	0	0	0	0	0	0			0	0	0
175	7	3	2004	1	15	2004-01-15	3	0	0.385417	1950	0	11		1	1	1	37.9	1	2			Jogo	1	0	1	0	0	0	0	1			0	0	0
176	7	3	2004	1	15	2004-01-15	3	0	0.391667	4675	0	3		1	1	2	37.6	1	2			Furvela	1	0	1	0	0	0	0	1			0	0	0
180	7	3	2004	1	15	2004-01-15	3	0	0.442361	4586	0	5		1	1	2	35.8	0	2			M'bene	1	0	1	0	0	0	0	1			0	0
188	7	3	2004	1	16	2004-01-16	3	9	9	4822	0	3		1	1	2	37	0	2			Furvela	3	0	0	0	1	0	0	1
226	9	3	2004	1	16	2004-01-16	3	0	0.427778	4897	0	3		1	1	1	40	1	2			Furvela	5	0	0	0	0	0	1	1			0	0	0
232	9	3	2004	1	16	2004-01-16	3	11	11	3500	0	10		1	1	2	38.5	1	3			jogo	5	0	0	0	0	0	1	1			0	0	0
225	9	3	2004	1	16	2004-01-16	3	0	0.378472	4896	0	2		1	1	2						Matumbela	1	0	1	0	0	0	0	1			0	0	0
4401	187	3	2007	1	15	2007-01-15	3	09:44:00	09:44:00	7163	0	9		1	1	1	36	0	2			jogo	5	0	0	0	0	0	1	1			0	0
4402	187	3	2007	1	15	2007-01-15	3	09:53:00	09:53:00	7217	0	8		1	1	1	36	0	2			Furvela	0	1	0	0	0	0	0	0			0	0	0
4408	188	3	2007	1	15	2007-01-15	3	11:18:00	11:18:00	7219	0	7		1	1	1						Furvela	4	0	0	0	0	1	0	1			0	0	0
4411	188	3	2007	1	16	2007-01-16	3	08:53:00	08:53:00	7334	0	3		1	1	1	37	0	2		TR f(+)	Furvela	5	0	0	0	0	0	1	1			0	0	0
4412	188	3	2007	1	16	2007-01-16	3	09:18:00	09:18:00	7317	0	3		1	1	2	36.9	0	2			jogo	0	1	0	0	0	0	0	0			0	0	0
4413	188	3	2007	1	16	2007-01-16	3	10:22:00	10:22:00	7096	0	10		1	1	2			2			Furvela	3	0	0	0	1	0	0	1			0	0	0
4425	188	3	2007	1	17	2007-01-17	3	11:30:00	11:30:00	7273	0	11		1	1	1	36.9	0	2			nharrumbo	0	1	0	0	0	0	0	0			0	0	0
4416	188	3	2007	1	17	2007-01-17	3	08:45:00	08:45:00	7336	1			1	1	2	40.1	1	2			balavala	4	0	0	0	0	1	0	1			0	0	0
4423	188	3	2007	1	17	2007-01-17	3	11:15:00	11:15:00	7338	0	5		1	1	1	38	1	6		TR	h v`culos	4	0	0	0	0	1	0	1			0	0	0
4428	188	3	2007	1	18	2007-01-18	3	08:58:00	08:58:00	7339	0	10		1	1	1	37.6	1	3			Furvela	1	0	1	0	0	0	0	1			0	0	0
4432	189	3	2007	1	18	2007-01-18	3	10:15:00	10:15:00	7312	0	11		1	1	1						nharrumbo	0	1	0	0	0	0	0	0			0	0	0
4434	189	3	2007	1	19	2007-01-19	3	08:28:00	08:28:00	7342	0	8		1	1	1	40.5	1	3			jogo	3	0	0	0	1	0	0	1			0	0	0
3521	158	3	2008	1	14	2008-01-14	3	0	0.377778	7827	0	3		1	1	1	37.1	0	3			nharrumbo	0	1	0	0	0	0	0	0			0	0	0
3527	158	3	2008	1	14	2008-01-14	3	0	0.415278	7832	0	4		1	1	2	36.8	0	3			nharrumbo	0	1	0	0	0	0	0	0			0	0	0
3543	159	3	2008	1	15	2008-01-15	3	0	0.418056	7838	0	8		1	1	1	37.1	0	2			xibaela	1	0	1	0	0	0	0	1			0	0	0
3547	159	3	2008	1	15	2008-01-15	3	0	0.459722	7842	0	4		1	1	1	40.5	1	2			ucucho	3	0	0	0	1	0	0	1			0	0	0
3549	159	3	2008	1	15	2008-01-15	3	0	0.481944	7572	0	9		1	1	2	40	1	2			Furvela	4	0	0	0	0	1	0	1			0	0	0
3540	158	3	2008	1	15	2008-01-15	3	0	0.378472	7837	1			1	1	1	36.6	0	2			Furvela	0	1	0	0	0	0	0	0			0	0	0
3552	159	3	2008	1	15	2008-01-15	3	0	0.500694	7603	0	11		1	1	1	38.6	1				bovane	4	0	0	0	0	1	0	1			0	0	0			hospital
3566	159	3	2008	1	16	2008-01-16	3	0	0.502083	7849	0	4		1	1	1	39.3	1	2			jogo	3	0	0	0	1	0	0	1			0	0	0
3560	159	3	2008	1	16	2008-01-16	3	0	0.392361	7846	0	4		1	1	1	39.2	1	5			jogo	0	1	0	0	0	0	0	0			0	0
3563	159	3	2008	1	16	2008-01-16	3	0	0.459028	7847	0	10		1	1	2						jogo	1	0	1	0	0	0	0	1			0	0	0
3571	159	3	2008	1	17	2008-01-17	3	0	0.373611	7852	0	10		1	1	1	37.7	1	2			matumbela	1	0	1	0	0	0	0	1			0	0
3574	160	3	2008	1	17	2008-01-17	3	0	0.419444	7853	0	11		1	1	2	36.6	0	2			Furvela	3	0	0	0	1	0	0	1			0	0
3587	160	3	2008	1	18	2008-01-18	3	0	0.417361	7630	0	10		1	1	1	37.5	1	2			balavala	3	0	0	0	1	0	0	1			0	0	0
3583	160	3	2008	1	18	2008-01-18	3	0	0.336806	7857	0	10		1	1	2	38.8	1	3			jogo	3	0	0	0	1	0	0	1			0	0
249	9	3	2004	1	19	2004-01-19	4	0	0.38125		0	1		1	1	1	37.4	0	2			Furvela	4	0	0	0	0	1	0	1			0	0	0
132	6	3	2004	1	19	2004-01-19	4	0	0.378472	3889	1			1	1	1	36.6	0	2			Furvela	5	0	0	0	0	0	1	1			0	0	0
135	6	3	2004	1	19	2004-01-19	4	0	0.420833	4793	0	6		1	1	1	39.7	1	3			Matumbela	1	0	1	0	0	0	0	1			0	0	0
154	6	3	2004	1	20	2004-01-20	4	0	0.452778	4916	0	7		1	1	1	37.6	1	2			Jogo	0	1	0	0	0	0	0	0			0	0	0
146	6	3	2004	1	20	2004-01-20	4	08:04:00	08:04:00	4869	0	3		1	1	2	37.6	1				Furvela	0	1	0	0	0	0	0	0			0	0	0
153	6	3	2004	1	20	2004-01-20	4	0	0.419444	1831	0	3		1	1	1						Jogo	1	0	1	0	0	0	0	1			0	0	0
99	5	4	2004	1	21	2004-01-21	4	0	0.34375	4921	0	3		1	1	1	36.1	0	2			Chidanga	0	1	0	0	0	0	0	0			0	0	0						r
100	5	4	2004	1	21	2004-01-21	4	0	0.334722	4922	0	9		1	1	2	36.9	0	2			Furvela	4	0	0	0	0	1	0	1			0	0
101	5	4	2004	1	21	2004-01-21	4	0	0.370139	4923	0	9		1	1	2	39.8	1	2			Furvela	4	0	0	0	0	1	0	1			0	0	0
102	5	4	2004	1	21	2004-01-21	4	0	0.41875	4924	0	6		1	1	2	37.6	1	3			Jogo	0	1	0	0	0	0	0	0			0	0	0
103	5	4	2004	1	22	2004-01-22	4	0	0.295139	4393	0	9		1	1	1	35.6	0	3			Vala	1	0	1	0	0	0	0	1			0	0
109	5	4	2004	1	22	2004-01-22	4	0	0.427083	1793	0	3		1	1	2	38.4	1	3			Furvela	3	0	0	0	1	0	0	1			0	0
723	26	4	2004	1	24	2004-01-24	4	0	0.40625	6034	0	6		1	1	2	39.1	1	2			Matumbela	3	0	0	0	1	0	0	1			0	0	0
724	26	4	2004	1	24	2004-01-24	4	0	0.413194	4921	0	4		1	1	1			2			Furvela	0	1	0	0	0	0	0	0			0	0	0
732	26	4	2004	1	24	2004-01-24	4	0	0.459722	6107	0	1		1	1	2	39	1	2	control		Wengue	3	0	0	0	1	0	0	1			0	0	0
726	26	4	2004	1	24	2004-01-24	4	0	0.432639	4695	0	4		1	1	2						Furvela	0	1	0	0	0	0	0	0			0	0
4440	189	4	2007	1	22	2007-01-22	4	08:31:00	08:31:00	7264	0	4		1	1	2	36.6	0	4			jogo	0	1	0	0	0	0	0	0			0	0	0
4439	189	4	2007	1	22	2007-01-22	4			7345	0.0191781	1		1	1	1	39.3	1	4			Furvela	5	0	0	0	0	0	1	1			0	0	0	310	510
4472	190	4	2007	1	25	2007-01-25	4	11:14:00	11:14:00	7313	0	4		1	1	1	38.4	1	2			jogo	0	1	0	0	0	0	0	0			0	1
4468	190	4	2007	1	25	2007-01-25	4	08:18:00	08:18:00	7342	0	8		1	1	1						jogo	0	1	0	0	0	0	0	0			0	0	0
4471	190	4	2007	1	25	2007-01-25	4	10:27:00	10:27:00	7219	0	7		1	1	1							0	1	0	0	0	0	0	0			0	0	0
4473	190	4	2007	1	25	2007-01-25	4	11:19:00	11:19:00	7314	0	4		1	1	2						Furvela	0	1	0	0	0	0	0	0			0	0
3618	161	4	2008	1	22	2008-01-22	4	0	0.452083	7572	0	9		1	1	2			2			Furvela	0	1	0	0	0	0	0	0			0	0
3609	161	4	2008	1	22	2008-01-22	4	0	0.350694	7872	0	8		1	1	2	37.4	0	3			jogo	3	0	0	0	1	0	0	1			0	0
3621	161	4	2008	1	23	2008-01-23	4	8	8	7832	0	4		1	1	2	39.9	1	3			jogo	0	1	0	0	0	0	0	0			0	0
3625	161	4	2008	1	23	2008-01-23	4	0	0.365972	7853	0	11		1	1	2	36.7	0	3			jogo	4	0	0	0	0	1	0	1			0	0	0
3630	162	4	2008	1	23	2008-01-23	4	0	0.377778	7853	0	10		1	1	1	37.2	0	3			jogo	5	0	0	0	0	0	1	1			0	0	0
3638	162	4	2008	1	24	2008-01-24	4	0	0.40625	7879	0	4		1	1	1			2			ucucho	0	1	0	0	0	0	0	0			0	0
3639	162	4	2008	1	24	2008-01-24	4	0	0.414583	7880	0	7		1	1	2	37.3	0	2			jogo	3	0	0	0	1	0	0	1			0	0	0
3648	162	4	2008	1	24	2008-01-24	4	0	0.475	7644	0	5		1	1	2			2			Furvela	2	0	0	1	0	0	0	1			0	0	0
3647	162	4	2008	1	24	2008-01-24	4	0	0.471528	7643	0	5		1	1	1	37.1	0	5			Furvela	1	0	1	0	0	0	0	1			0	0
316	12	4	2004	1	26	2004-01-26	5	0	0.378472	4937	1			1	1	1	38	1	1			matumbela	4	0	0	0	0	1	0	1			0	0	0
115	5	4	2004	1	26	2004-01-26	5	0	0.335417	4604	0	5		1	1	2			2		TR	Matumbela	4	0	0	0	0	1	0	1			0	0	0
119	5	4	2004	1	26	2004-01-26	5	0	0.336806	4931	0	2		1	1	2	39	1	2			Furvela	3	0	0	0	1	0	0	1			0	0	0
122	5	4	2004	1	26	2004-01-26	5	0	0.378472	4933	0	2		1	1	2	38.1	1	2			Jogo	3	0	0	0	1	0	0	1			0	0	0
319	12	4	2004	1	26	2004-01-26	5	0	0.420833	4938	0	6		1	1	2	36	0	2			Furvela	0	1	0	0	0	0	0	0			0	0	0
321	12	4	2004	1	26	2004-01-26	5	0	0.418056	4939	0	7		1	1	1	35.8	0	2			Beula	3	0	0	0	1	0	0	1			0	0
325	12	4	2004	1	26	2004-01-26	5	0	0.502778	4943	0	2		1	1	1	39.2	1	2			Inharumbo	4	0	0	0	0	1	0	1			0	0	0
120	5	4	2004	1	26	2004-01-26	5	0	0.372222		1			1	1	2	36.6	0	2			Jogo	4	0	0	0	0	1	0	1			0	0	0	470	500
317	12	4	2004	1	26	2004-01-26	5	0	0.4125		1			1	1	1	36.1	0	2			Furvela	0	1	0	0	0	0	0	0			1		3
334	12	4	2004	1	27	2004-01-27	5	0	0.384028	3889	1			1	1	1						Furvela	1	0	1	0	0	0	0	1			0	0
9	1	5	2004	1	28	2004-01-28	5	0	0.364583	4432	0	8		1	1	2	38.6	1	2			Furvela	1	0	1	0	0	0	0	1			0	0
15	1	5	2004	1	28	2004-01-28	5	0	0.421528	4956	0	11		1	1	2	39	1	2			Furvela	5	0	0	0	0	0	1	1			0	0
16	1	5	2004	1	28	2004-01-28	5	0	0.426389	4957	0	7		1	1	2			2			Jogo	1	0	1	0	0	0	0	1			0	0
18	1	5	2004	1	28	2004-01-28	5	0	0.434028		0	6		1	1	2						jogo	0	1	0	0	0	0	0	0			0	0
77	4	5	2004	1	29	2004-01-29	5	0	0.34375	3937	0	11		1	1	2			2			Jogo	3	0	0	0	1	0	0	1			0	0
86	4	5	2004	1	29	2004-01-29	5	0	0.432639	5049	0	5		1	1	1	37.6	1	3			Matumbela	1	0	1	0	0	0	0	1			0	0
23	1	5	2004	1	29	2004-01-29	5	0	0.327778	4228	0	11		1	1	1	36	0	4			Chidanga	5	0	0	0	0	0	1	1			0	0	0
70	3	5	2004	1	30	2004-01-30	5	0	0.419444	4973	0	1		1	1	1	36.1	0	2			Furvela	0	1	0	0	0	0	0	0			0	0
68	3	5	2004	1	30	2004-01-30	5	0	0.434028	1855	0	4		1	1	2	38.4	1	3			Vala	4	0	0	0	0	1	0	1			0	0	0
4486	191	5	2007	1	29	2007-01-29	5	11:22:00	11:22:00	7362	0	5		1	1	1	36.4	0	3			Furvela	3	0	0	0	1	0	0	1			0	0
4484	191	5	2007	1	29	2007-01-29	5	11:00:00	11:00:00	6680	1			1	1	2	40.1	1	3			Furvela	2	0	0	1	0	0	0	1			0	0	0
4485	191	5	2007	1	29	2007-01-29	5	11:11:00	11:11:00	6681	1			1	1	1	38.3	1	3			Furvela	0	1	0	0	0	0	0	0			0	0
4478	190	5	2007	1	29	2007-01-29	5	08:30:00	08:30:00	7360	1			1	1	1	35.8	0	4			jogo	0	1	0	0	0	0	0	0			0	0	0
4489	191	5	2007	1	30	2007-01-30	5	08:36:00	08:36:00	7363	0	8		1	1	1	36.8	0	5			chiguelane	5	0	0	0	0	0	1	1			0	0
4488	191	5	2007	1	30	2007-01-30	5	08:16:00	08:16:00	7264	0	4		1	1	2						Furvela	0	1	0	0	0	0	0	0			0	0
4499	191	5	2007	1	31	2007-01-31	5	11:01:00	11:01:00	7365	0	7		1	1	1	37.4	0	2			jogo	0	1	0	0	0	0	0	0			0	0
4495	191	5	2007	1	31	2007-01-31	5	08:17:00	08:17:00	7336	1			1	1	2						balavala	0	1	0	0	0	0	0	0			0	0
3666	163	5	2008	1	28	2008-01-28	5	0	0.377778	7745	1			1	1	2	38.1	1	3			nharrumbo	2	0	0	1	0	0	0	1			0	0	0
3672	163	5	2008	1	28	2008-01-28	5	0	0.417361	7872	0	8		1	1	2						jogo	0	1	0	0	0	0	0	0			0	0	0
3678	163	5	2008	1	28	2008-01-28	5	0	0.475694	7897	0	10		1	1	2						Furvela	0	1	0	0	0	0	0	0			0	0
3684	163	5	2008	1	29	2008-01-29	5	0	0.407639	7899	0	5		1	1	2			2			Furvela	3	0	0	0	1	0	0	1			0	0
3679	163	5	2008	1	29	2008-01-29	5	0	0.334722	7692	0	6		1	1	2			3			Furvela	3	0	0	0	1	0	0	1			0	0	1
3709	164	5	2008	1	31	2008-01-31	5	0	0.351389	7907	0	5		1	1	2	37.1	0	2			jogo	0	1	0	0	0	0	0	0			0	0
3718	164	5	2008	1	31	2008-01-31	5	0	0.433333	7677	0	6		1	1	1	39	1	2			jogo	0	1	0	0	0	0	0	0			0	0	0
3755	166	5	2008	2	1	2008-02-01	5	0	0.347917	7914	1			1	1	1	36.2	0	2			h beira	3	0	0	0	1	0	0	1			0	0
1238	44	5	2004	2	2	2004-02-02	6	0	0.36875	4982	0	5		1	1	2	36.7	0	2			Jogo	5	0	0	0	0	0	1	1			0	0
1231	44	5	2004	2	2	2004-02-02	6	0	0.334722	4593	1			1	1	1	38.5	1	3			Jogo	4	0	0	0	0	1	0	1			0	0
525	19	5	2004	2	2	2004-02-02	6	0	0.489583	4989	1			1	1	1	36.8	0				Inharumbo	3	0	0	0	1	0	0	1			0	0	0
527	19	5	2004	2	3	2004-02-03	6	0	0.309028	1962	0	10		1	1	1	36.6	0	2			Jogo	3	0	0	0	1	0	0	1			0	0
1012	36	5	2004	2	3	2004-02-03	6	0	0.377083	1931	0	5		1	1	2			3			Jogo	5	0	0	0	0	0	1	1			0	0
1014	36	5	2004	2	3	2004-02-03	6	0	0.429167	4516	0	10		1	1	1						Matumbela	3	0	0	0	1	0	0	1			0	0
1015	36	5	2004	2	3	2004-02-03	6	0	0.468056	6139	0	2		1	1	2	38	1				Furvela	1	0	1	0	0	0	0	1			0	0				hospital
470	17	6	2004	2	4	2004-02-04	6	0	0.489583	1631	1			1	1	1	39.1	1	1			Furvela	4	0	0	0	0	1	0	1			0	0	0
468	17	6	2004	2	4	2004-02-04	6	0	0.473611	6015	0	4		1	1				2			Jogo	0	1	0	0	0	0	0	0			0	0	0
513	18	6	2004	2	4	2004-02-04	6	0	0.413194		0	8		1	1	1	39.3	1	2			Furvela	5	0	0	0	0	0	1	1			0	0
548	19	6	2004	2	4	2004-02-04	6	0	0.350694	6004	0	6		1	1	1	37.4	0	2			Jogo	1	0	1	0	0	0	0	1			0	0
514	18	6	2004	2	4	2004-02-04	6	0	0.418056		0	4		1	1	2	38.4	1	5			Jogo	4	0	0	0	0	1	0	1			0	0	0
436	16	6	2004	2	5	2004-02-05	6	0	0.488889	1882	0	7		1	1	2	39.6	1	2			Furvela	5	0	0	0	0	0	1	1			0	0
480	17	6	2004	2	5	2004-02-05	6	0	0.336806	4740	0	10		1	1	1	38.2	1	2			Furvela	3	0	0	0	1	0	0	1			0	0	0
438	16	6	2004	2	5	2004-02-05	6	0	0.461806	4869	0	4		1	1	1	38.4	1	3			Furvela	4	0	0	0	0	1	0	1			0	0
443	16	6	2004	2	6	2004-02-06	6	0	0.350694	1722	0	8		1	1	2	35.9	0	2			Furvela	3	0	0	0	1	0	0	1			1
446	16	6	2004	2	6	2004-02-06	6	0	0.371528	6023	0	6		1	1	2	37.8	1	3			Jogo	1	0	1	0	0	0	0	1			0	0	0
412	15	6	2004	2	9	2004-02-09	7	0	0.4125	4711	0	9		1	1	1	36.8	0	2			Furvela	3	0	0	0	1	0	0	1			0	0	0
417	15	6	2004	2	9	2004-02-09	7	0	0.436806	4579	0	11		1	1	2			2			Furvela	1	0	1	0	0	0	0	1			0	0
420	15	6	2004	2	9	2004-02-09	7	0	0.45	4823	0	4		1	1	2	36.6	0	2			Furvela	3	0	0	0	1	0	0	1			2	1	4
425	15	6	2004	2	9	2004-02-09	7	0	0.478472	6034	0	6		1	1	1	35.6	0	2			Matumbela	1	0	1	0	0	0	0	1
422	15	6	2004	2	9	2004-02-09	7	0	0.456944	1931	0	4		1	1	1	36.8	0	3			Furvela	0	1	0	0	0	0	0	0
397	14	7	2004	2	11	2004-02-11	7	0	0.334722	1962	0	11		1	1	1	38.9	1	2			Furvela	3	0	0	0	1	0	0	1
398	14	7	2004	2	11	2004-02-11	7	0	0.350694	4921	0	4		1	1	1			2			Furvela	4	0	0	0	0	1	0	1
399	14	7	2004	2	11	2004-02-11	7	0	0.363194	6048	0	7		1	1	1	39.7	1	2			Jogo	5	0	0	0	0	0	1	1
402	14	7	2004	2	11	2004-02-11	7	0	0.375694	4743	0	6		1	1	2	36.3	0	2			Matumbela	0	1	0	0	0	0	0	0			0	0
403	14	7	2004	2	11	2004-02-11	7	0	0.383333	4742	0	6		1	1	2	37.3	0	2		TR	Matumbela	3	0	0	0	1	0	0	1								hospital
368	13	7	2004	2	12	2004-02-12	7	9	9	4487	0	9		1	1	2	36.3	0	2			Furvela	0	1	0	0	0	0	0	0			0	0				hospital
372	13	7	2004	2	12	2004-02-12	7	0	0.400694	5068	0	3		1	1	1	38.4	1	2			Jogo	3	0	0	0	1	0	0	1
667	24	7	2004	2	12	2004-02-12	7	0	0.459028	5027	0	3		1	1	2	36.9	0	2			Furvela	0	1	0	0	0	0	0	0
664	24	7	2004	2	12	2004-02-12	7	0	0.431944		0	5		1	1	2	36.9	0	3			Matumbela	3	0	0	0	1	0	0	1
360	13	7	2004	2	12	2004-02-12	7	0	0.329861	4956	1			1	1	2	37.8	1				Chidanga	0	1	0	0	0	0	0	0
680	24	7	2004	2	13	2004-02-13	7	0	0.405556	6061	0	3		1	1	1	38.4	1	3			Furvela	0	1	0	0	0	0	0	0
674	24	7	2004	2	13	2004-02-13	7	0	0.345833	6055	0	5		1	1	2						M´bene	0	1	0	0	0	0	0	0								hospital
679	24	7	2004	2	13	2004-02-13	7	0	0.401389	1882	0	7		1	1	2						Furvela	4	0	0	0	0	1	0	1								hospital
3762	166	7	2008	2	11	2008-02-11	7	0	0.377778	7919	0	11		1	1	2	38.1	1	2			Furvela	0	1	0	0	0	0	0	0
3763	166	7	2008	2	11	2008-02-11	7	0	0.392361	7585	1			1	1	1	39	1	2			Furvela	5	0	0	0	0	0	1	1
3772	166	7	2008	2	12	2008-02-12	7	0	0.440972	7924	0	8		1	1	1	39	1				ucucho	4	0	0	0	0	1	0	1											r
3773	166	7	2008	2	12	2008-02-12	7	0	0.463889	7686	1			1	1	1						Furvela	1	0	1	0	0	0	0	1
3776	166	7	2008	2	13	2008-02-13	7	8?	8?		1			1	1	1						jogo	0	1	0	0	0	0	0	0			0	0
3849	169	7	2009	2	15	2009-02-15	7	0	0.459028	7927	0	6		1	1	1			2			Furvela	4	0	0	0	0	1	0	1
3845	169	7	2009	2	15	2009-02-15	7	0	0.350694	7926	0	5		1	1	1	37.8	1	3			jogo	1	0	1	0	0	0	0	1
642	23	7	2004	2	16	2004-02-16	8	0	0.457639	6067	0	5		1	1	2	37.5	1	2			Furvela	1	0	1	0	0	0	0	1
639	23	7	2004	2	16	2004-02-16	8	0	0.378472		0	9		1	1	1	37.3	0	3			Matumbela	1	0	1	0	0	0	0	1
637	23	7	2004	2	16	2004-02-16	8	0	0.377778	6066	0	4		1	1	2						Matumbela	4	0	0	0	0	1	0	1
604	22	7	2004	2	17	2004-02-17	8	0	0.434028	4360	0	9		1	1	1	35.8	0	2			Matumbela	1	0	1	0	0	0	0	1
647	23	7	2004	2	17	2004-02-17	8	0	0.329861	6069	0	7		1	1	2	39.3	1	2			Jogo	1	0	1	0	0	0	0	1
650	23	7	2004	2	17	2004-02-17	8	0	0.34375	4779	0	11		1	1	1	38.6	1	2			Furvela	1	0	1	0	0	0	0	1			0	0
659	23	7	2004	2	17	2004-02-17	8	0	0.377778	675	0	4		1	1	2	35.5	0	2			Vala	3	0	0	0	1	0	0	1
651	23	7	2004	2	17	2004-02-17	8	0	0.345833	6072	1			1	1	1	38.1	1	2			Jogo	5	0	0	0	0	0	1	1
655	23	7	2004	2	17	2004-02-17	8	9	9	4695	0	4		1	1	2	37	0	3			Matumbela	3	0	0	0	1	0	0	1
616	22	8	2004	2	18	2004-02-18	8	0	0.336111		1			1	1	2	36.7	0	2			Matumbela	5	0	0	0	0	0	1	1
613	22	8	2004	2	18	2004-02-18	8	0	0.322917	6079	0	5		1	1	1						Jogo	3	0	0	0	1	0	0	1			0	0
597	21	8	2004	2	19	2004-02-19	8	0	0.41875	6057	0	5		1	1	1	35.9	0	2			Matumbela	4	0	0	0	0	1	0	1
584	21	8	2004	2	19	2004-02-19	8	0	0.365972	6088	0	5		1	1	2	35.6	0	4			Furvela	4	0	0	0	0	1	0	1
554	20	8	2004	2	20	2004-02-20	8	0	0.357639		0	5		1	1	1	38.4	1	2			Furvela	4	0	0	0	0	1	0	1
559	20	8	2004	2	20	2004-02-20	8	0	0.375694	6095	0	7		1	1	2	35.6	0	2			Mahangue	4	0	0	0	0	1	0	1			0	0
565	20	8	2004	2	20	2004-02-20	8	10	10	4808	0	4		1	1	1	38.8	1	2			Matumbela	0	1	0	0	0	0	0	0
3852	169	8	2009	2	19	2009-02-19	8	0	0.348611	7929	0	6		1	1	1	37.3	0	2			matumbela	4	0	0	0	0	1	0	1
3859	169	8	2009	2	19	2009-02-19	8	0	0.403472	7607	0	7		1	1	2	39.9	1	2			Furvela	5	0	0	0	0	0	1	1
3856	169	8	2009	2	19	2009-02-19	8	0	0.384722	7932	0	7		1	1	1	38.4	1	3			Furvela	0	1	0	0	0	0	0	0
3864	169	8	2009	2	19	2009-02-19	8	0	0.475694	7656	0	9		1	1	2	38.7	1	3			Furvela	3	0	0	0	1	0	0	1
3877	169	8	2009	2	20	2009-02-20	8	0	0.420139	7941	0	5		1	1	1	37.6	1	3			jogo	3	0	0	0	1	0	0	1
573	20	8	2004	2	23	2004-02-23	9	0	0.331944	6066	0	4		1	1	2	36.8	0	2			Jogo	5	0	0	0	0	0	1	1
697	25	8	2004	2	23	2004-02-23	9	0	0.369444	4825	0	7		1	1	1	39.8	1	2			Jogo	4	0	0	0	0	1	0	1
700	25	8	2004	2	23	2004-02-23	9	0	0.376389	1831	0	4		1	1	2	39.3	1	2	control		Furvela	3	0	0	0	1	0	0	1
712	25	8	2004	2	23	2004-02-23	9	0	0.505556	1514	1			1	1	2	37.9	1	3			Furvela	1	0	1	0	0	0	0	1
572	20	8	2004	2	23	2004-02-23	9	0	0.329861	6100	0	4		1	1	1	37.7	1				Furvela	3	0	0	0	1	0	0	1
575	20	8	2004	2	23	2004-02-23	9	0	0.348611	4233	1			1	1	1	39.4	1				Matumbela	0	1	0	0	0	0	0	0
716	25	8	2004	2	24	2004-02-24	9	0	0.331944	6105	0	2		1	1	2	38.4	1	1			Furvela	1	0	1	0	0	0	0	1
713	25	8	2004	2	24	2004-02-24	9	0	0.322917	4604	0	6		1	1	2	40.2	1	2			C. Maputo	0	1	0	0	0	0	0	0
718	25	8	2004	2	24	2004-02-24	9	0	0.334722	6075	0	4		1	1	2	38.8	1	2			Furvela	1	0	1	0	0	0	0	1
719	25	8	2004	2	24	2004-02-24	9	0	0.335417	4232	0	11		1	1	1	36.6	0				Furvela	4	0	0	0	0	1	0	1			0	0
740	26	9	2004	2	25	2004-02-25	9	8	8	6088	0	5		1	1	1	39.5	1	2			Jogo	4	0	0	0	0	1	0	1
1183	42	9	2004	2	25	2004-02-25	9	0	0.378472		0	5		1	1	2	36	0	3			Chidanga	4	0	0	0	0	1	0	1
737	26	9	2004	2	25	2004-02-25	9	0	0.324306	6109	1			1	1	2	37.2	0	3			Jogo	4	0	0	0	0	1	0	1
742	26	9	2004	2	25	2004-02-25	9	0	0.35625	6111	0	1		1	1	1	36.7	0				Ucucho	0	1	0	0	0	0	0	0
739	26	9	2004	2	25	2004-02-25	9	0	0.332639		1			1	1	2				control		Matumbela	1	0	1	0	0	0	0	1
1196	42	9	2004	2	26	2004-02-26	9	9	9	1962	0	10		1	1	2	38.6	1	2			Furvela	4	0	0	0	0	1	0	1
1204	42	9	2004	2	26	2004-02-26	9	0	0.434722	1899	0	9		1	1	2			2			Furvela	4	0	0	0	0	1	0	1
1212	43	9	2004	2	26	2004-02-26	9	0	0.477778	3669	0	5		1	1	2	38.2	1	2			Furvela	3	0	0	0	1	0	0	1			0	0
1189	42	9	2004	2	26	2004-02-26	9	0	0.324306	6114	0	6		1	1	2	38.4	1				Jogo	1	0	1	0	0	0	0	1
1203	42	9	2004	2	26	2004-02-26	9	0	0.427778	6119	0	11		1	1	2	35.6	0				Jogo	3	0	0	0	1	0	0	1
1216	43	9	2004	2	27	2004-02-27	9	0	0.341667	4390	0	9		1	1	1			2			Matumbela	3	0	0	0	1	0	0	1			0	0
1220	43	9	2004	2	27	2004-02-27	9	9	9	4376	0	8		1	1	2			4			Barane	0	1	0	0	0	0	0	0								hospital
1225	43	9	2004	2	27	2004-02-27	9	0	0.459722	4466	0	11		1	1	2			4			Uwa	1	0	1	0	0	0	0	1
1222	43	9	2004	2	27	2004-02-27	9	0	0.401389	4675	0	4		1	1	2	38.6	1				Ucucho	0	1	0	0	0	0	0	0			0	0				hospital
1223	43	9	2004	2	27	2004-02-27	9	10	10	4773	0	5		1	1	1						Furvela	0	1	0	0	0	0	0	0
1226	43	9	2004	2	28	2004-02-28	9	0	0.460417	5269	0	4		1	1	1	37.3	0	2			Furvela	0	1	0	0	0	0	0	0
1042	37	9	2004	3	1	2004-03-01	10	0	0.38125	5580	0	5		1	1	1			2			Matumbela	0	1	0	0	0	0	0	0
1044	37	9	2004	3	1	2004-03-01	10	0	0.376389	6129	0	3		1	1	2	35.5	0	2			Jogo	4	0	0	0	0	1	0	1
1034	37	9	2004	3	1	2004-03-01	10	0	0.3375		0	5		1	1	1	36.7	0	3			Matumbela	3	0	0	0	1	0	0	1
1055	37	9	2004	3	1	2004-03-01	10	0	0.443056	4706	0	8		1	1	1	40.1	1	3			Jogo	5	0	0	0	0	0	1	1
1056	37	9	2004	3	1	2004-03-01	10	0	0.449306	6133	0	5		1	1	2	37.3	0	3			Furvela	4	0	0	0	0	1	0	1			0	0
1057	37	9	2004	3	1	2004-03-01	10	0	0.420139		0	8		1	1	2	37.1	0	3			Furvela	1	0	1	0	0	0	0	1
1048	37	9	2004	3	1	2004-03-01	10	0	0.405556		0	11		1	1	2	37.8	1				Vala	4	0	0	0	0	1	0	1
1051	37	9	2004	3	1	2004-03-01	10	0	0.427083	6131	0	1		1	1	1						Matumbela	3	0	0	0	1	0	0	1
979	35	10	2004	3	4	2004-03-04	10	0	0.426389	6034	0	6		1	1	1	36.5	0	2			Jogo	4	0	0	0	0	1	0	1
1028	36	10	2004	3	4	2004-03-04	10	0	0.370139	6144	0	5		1	1	1	35.8	0	2		TR	Furvela	4	0	0	0	0	1	0	1
983	35	10	2004	3	4	2004-03-04	10	0	0.463194	4808	0	4		1	1	2						Furvela	0	1	0	0	0	0	0	0				1
1024	36	10	2004	3	4	2004-03-04	10	0	0.350694	4604	0	7		1	1	2						Matumbela	1	0	1	0	0	0	0	1
1027	36	10	2004	3	4	2004-03-04	10	0	0.336111	6105	0	2		1	1	1	37.2	0				Jogo	0	1	0	0	0	0	0	0
987	35	10	2004	3	5	2004-03-05	10	0	0.378472	6148	0	5		1	1	2	38.6	1	2			Chidanga	3	0	0	0	1	0	0	1
988	35	10	2004	3	5	2004-03-05	10	10	10	1722	0	9		1	1	2	37.5	1	2			Furvela	3	0	0	0	1	0	0	1
992	35	10	2004	3	5	2004-03-05	10	0	0.442361	4574	0	7		1	1	1	37	0	2		TR	Jogo	1	0	1	0	0	0	0	1								hospital
997	35	10	2004	3	5	2004-03-05	10	0	0.484028	1886	0	6		1	1	2	37.9	1	3			Jogo	0	1	0	0	0	0	0	0
5519	225	9	2008	3	3	2008-03-03	10	08:54:00	08:54:00	7953	0	11		1	1	2	37.3	0	2			matumbela	4	0	0	0	0	1	0	1
5531	225	9	2008	3	3	2008-03-03	10	10:59:00	10:59:00	7671	1			1	1	2	37.2	0	2			Furvela	1	0	1	0	0	0	0	1								hospital
5516	225	9	2008	3	3	2008-03-03	10	08:25:00	08:25:00	7951	0	8		1	1	1	38.1	1	3			jogo	0	1	0	0	0	0	0	0
5524	225	9	2008	3	3	2008-03-03	10	09:41:00	09:41:00	7956	0	11		1	1	2	38.2	1	3			Furvela	0	1	0	0	0	0	0	0
5549	226	10	2008	3	5	2008-03-05	10	10:45:00	10:45:00	7692	0	8		1	1	1	38.4	1	2			jogo	4	0	0	0	0	1	0	1								hospital
5566	226	10	2008	3	7	2008-03-07	10	10:10:00	10:10:00	7966	0	8		1	1	2	36.9	0	4			Furvela	4	0	0	0	0	1	0	1
1001	35	10	2004	3	8	2004-03-08	11	0	0.327778		0	4		1	1	1			2			Furvela	0	1	0	0	0	0	0	0
1006	35	10	2004	3	8	2004-03-08	11	0	0.345139	6075	0	5		1	1	2	36.5	0	2			Jogo	0	1	0	0	0	0	0	0
954	34	10	2004	3	8	2004-03-08	11	0	0.413194	6151	0	6		1	1	2						Matumbela	3	0	0	0	1	0	0	1
958	34	10	2004	3	8	2004-03-08	11	0	0.418056	4907	0	3		1	1	2						Matumbela	0	1	0	0	0	0	0	0
967	34	10	2004	3	9	2004-03-09	11	0	0.359722	6131	0	1		1	1	1			2			Furvela	0	1	0	0	0	0	0	0
963	34	10	2004	3	9	2004-03-09	11	0	0.330556	5580	0	5		1	1	2						Vala	0	1	0	0	0	0	0	0
971	34	10	2004	3	9	2004-03-09	11	0	0.413194	6155	0	5		1	1	2						Furvela	3	0	0	0	1	0	0	1
974	34	10	2004	3	9	2004-03-09	11	0	0.447917	1831	0	4		1	1	1						C. Maputo	3	0	0	0	1	0	0	1
932	33	10	2004	3	10	2004-03-10	11	0	0.373611	1920	0	5		1	1	1	37.1	0	2			Furvela	0	1	0	0	0	0	0	0
948	33	10	2004	3	10	2004-03-10	11	0	0.481944	4695	0	5		1	1	2	35.6	0	2		sim	Furvela	0	1	0	0	0	0	0	0			0	0
944	33	10	2004	3	10	2004-03-10	11	0	0.447222	161	0	4		1	1	1	38.4	1	3			Furvela	5	0	0	0	0	0	1	1
928	33	10	2004	3	10	2004-03-10	11	0	0.334722	6088	0	6		1	1	1	36	0				Jogo	0	1	0	0	0	0	0	0
931	33	10	2004	3	10	2004-03-10	11	0	0.363889	4823	0	5		1	1	2						Jogo	4	0	0	0	0	1	0	1			0	0				hospital
939	33	10	2004	3	10	2004-03-10	11	0	0.415278	6111	0	2		1	1	1	36.5	0				Jogo	1	0	1	0	0	0	0	1
947	33	10	2004	3	10	2004-03-10	11	0	0.473611	4745	0	9		1	1	1						Furvela	0	1	0	0	0	0	0	0
906	32	11	2004	3	11	2004-03-11	11	0	0.465972	6163	0	7		1	1	1			2			Wengue	0	1	0	0	0	0	0	0
951	33	11	2004	3	11	2004-03-11	11	0	0.425	96	0	3		1	1	2	36.4	0	2			Jogo	1	0	1	0	0	0	0	1
908	32	11	2004	3	12	2004-03-12	11	0	0.330556	6164	0	3		1	1	2	37.1	0	3			Jogo	0	1	0	0	0	0	0	0
912	32	11	2004	3	12	2004-03-12	11	0	0.371528	4360	0	10		1	1	1			3			Matumbela	3	0	0	0	1	0	0	1
5571	226	10	2008	3	10	2008-03-10	11	08:45:00	08:45:00	7969	1			1	1	1	38.8	1	1			Furvela	1	0	1	0	0	0	0	1			0	0				hospital
5575	226	10	2008	3	10	2008-03-10	11	09:57:00	09:57:00	7971	0	6		1	1	1	37	0	3			h maputo	3	0	0	0	1	0	0	1
5573	226	10	2008	3	10	2008-03-10	11	08:58:00	08:58:00	7671	1			1	1	2							0	1	0	0	0	0	0	0			0	0
5583	227	11	2008	3	11	2008-03-11	11	10:00:00	10:00:00	7976	0	3		1	1	1	38.2	1				Furvela	0	1	0	0	0	0	0	0
917	32	11	2004	3	15	2004-03-15	12	0	0.327778	5027	0	4		1	1	2	38.2	1	2	control		Jogo	3	0	0	0	1	0	0	1
924	32	11	2004	3	15	2004-03-15	12	0	0.369444	6169	0	11		1	1	2	36.8	0	2			Furvela	5	0	0	0	0	0	1	1
925	32	11	2004	3	15	2004-03-15	12	0	0.371528	6148	0	5		1	1	1	38.7	1	2			Ulos	5	0	0	0	0	0	1	1
881	31	11	2004	3	15	2004-03-15	12	0	0.4625	6174	0	10		1	1	1	36.6	0	3			Matumbela	1	0	1	0	0	0	0	1
922	32	11	2004	3	15	2004-03-15	12	0	0.335417	4448	0	8		1	1	1	37.1	0	3			Furvela	3	0	0	0	1	0	0	1
877	31	11	2004	3	15	2004-03-15	12	0	0.442361	6171	0	5		1	1	1						Furvela	0	1	0	0	0	0	0	0
839	30	11	2004	3	16	2004-03-16	12	0	0.41875	6180	0.0575342			1	1	2	37.3	0	1			jogo	3	0	0	0	1	0	0	1
894	31	11	2004	3	16	2004-03-16	12	0	0.406944	6178	0	5		1	1	1	36.6	0	3			Jogo	5	0	0	0	0	0	1	1			0	3	0
887	31	11	2004	3	16	2004-03-16	12	0	0.352778	6138	0	9		1	1	2	35.6	0				Ucucho	0	1	0	0	0	0	0	0			0	0
854	30	11	2004	3	17	2004-03-17	12	0	0.420139		0	8		1	1	2	37	0	2			Jogo	1	0	1	0	0	0	0	1
849	30	11	2004	3	17	2004-03-17	12	0	0.352778	6183	0	7		1	1	1	38.6	1	4			Jogo	0	1	0	0	0	0	0	0
815	29	12	2004	3	18	2004-03-18	12	0	0.484028	4516	0	10		1	1	2	37.9	1	2			Furvela	1	0	1	0	0	0	0	1
860	30	12	2004	3	18	2004-03-18	12	0	0.345833	4823	0	5		1	1	1						C. Maputo	3	0	0	0	1	0	0	1
862	30	12	2004	3	18	2004-03-18	12	0	0.336111	1962	1			1	1	2	37.7	1				Furvela	1	0	1	0	0	0	0	1
816	29	12	2004	3	19	2004-03-19	12	0	0.295139	4579	1			1	1	1	38.2	1	2			Furvela	3	0	0	0	1	0	0	1			0	0
5608	227	11	2008	3	17	2008-03-17	12	09:06:00	09:06:00	7982	0	5		1	1	1	37.2	0	2			Furvela	3	0	0	0	1	0	0	1			0	0
5617	228	11	2008	3	17	2008-03-17	12	10:47:00	10:47:00	7987	0	1		1	1	1			2			Furvela	0	1	0	0	0	0	0	0
5619	228	11	2008	3	17	2008-03-17	12	11:14:00	11:14:00	7663	0	10		1	1	1	36.4	0				jogo	4	0	0	0	0	1	0	1			0	0
5623	228	11	2008	3	17	2008-03-17	12	11:33:00	11:33:00	7989	0	6		1	1	2	36.7	0				Furvela	2	0	0	1	0	0	0	1
5630	228	12	2008	3	18	2008-03-18	12	10:08:00	10:08:00	7991	0	6		1	1	1	38.8	1				matumbela	2	0	0	1	0	0	0	1
5649	229	12	2008	3	21	2008-03-21	12	09:29:00	09:29:00	7996	0	4		1	1	1			3			matumbela	4	0	0	0	0	1	0	1
828	29	12	2004	3	22	2004-03-22	13	0	0.370139	4924	0	10		1	1	1			2			Furvela	0	1	0	0	0	0	0	0			1	0	0
832	29	12	2004	3	22	2004-03-22	13	0	0.377083	6191	0	7		1	1	1	39.2	1	3			Furvela	4	0	0	0	0	1	0	1			0	0
827	29	12	2004	3	22	2004-03-22	13	0	0.336111		1			1	1	1	38.5	1	3			Jogo	3	0	0	0	1	0	0	1
825	29	12	2004	3	22	2004-03-22	13	0	0.3375	6164	0	3		1	1	1			4			Jogo	1	0	1	0	0	0	0	1
836	29	12	2004	3	22	2004-03-22	13	0	0.418056	5042	0	5		1	1	2						Furvela	0	1	0	0	0	0	0	0								hospital
779	28	12	2004	3	23	2004-03-23	13	0	0.334722	6075	0	5		1	1	1	36.7	0	2			Vala	4	0	0	0	0	1	0	1
787	28	12	2004	3	24	2004-03-24	13	0	0.329861	6198	0	2		1	1	2	38	1	2			Jogo	3	0	0	0	1	0	0	1
794	28	12	2004	3	24	2004-03-24	13	0	0.427778	6151	0	6		1	1	2	39	1	3			Furvela	5	0	0	0	0	0	1	1
786	28	12	2004	3	24	2004-03-24	13	0	0.294444	5580	0	5		1	1	2						Furvela	0	1	0	0	0	0	0	0
796	28	12	2004	3	24	2004-03-24	13	0	0.463889		0	4		1	1	2						Vala	1	0	1	0	0	0	0	1
795	28	12	2004	3	24	2004-03-24	13	0	0.432639		1			1	1	1						Matumbela	0	1	0	0	0	0	0	0
802	28	13	2004	3	25	2004-03-25	13	0	0.334722	6203	0	7		1	1	1	34.6		3			Jogo	4	0	0	0	0	1	0	1
803	28	13	2004	3	25	2004-03-25	13	0	0.335417	6204	1			1	1	2	36.7	0	3			Jogo	3	0	0	0	1	0	0	1
746	27	13	2004	3	25	2004-03-25	13	0	0.40625	6207	0	5		1	1	2						Matumbela	3	0	0	0	1	0	0	1
748	27	13	2004	3	25	2004-03-25	13	0	0.418056	4579	1			1	1	1	35.9	0				Furvela	0	1	0	0	0	0	0	0
754	27	13	2004	3	26	2004-03-26	13	10	10		0	11		1	1	1	37	0	2			Vala	1	0	1	0	0	0	0	1
5661	229	13	2008	3	25	2008-03-25	13	08:54:00	08:54:00	7656	0	10		1	1	2	35.6	0	2			Furvela	3	0	0	0	1	0	0	1
3385	150	14	2003	4	1	2003-04-01	14	0	0.377778	3403	0	6		1	1	2			1			Furvela	3	0	0	0	1	0	0	1			0	0
3394	152	14	2003	4	1	2003-04-01	14	0	0.295139	3910	0	11		1	1	2	38.2	1	2		TR	matumbela	5	0	0	0	0	0	1	1
3404	153	14	2003	4	1	2003-04-01	14	0	0.418056	3132	0	10		1	1	1			2			matumbela	3	0	0	0	1	0	0	1
3379	150	14	2003	4	1	2003-04-01	14	9	9	3915	0	3		1	1	2	37.8	1	3				0	1	0	0	0	0	0	0
3407	153	14	2003	4	1	2003-04-01	14	0	0.461111	3919	1			1	1	2			4			jogo	0	1	0	0	0	0	0	0
3370	149	14	2003	4	2	2003-04-02	14	0	0.418056	4006	0	10		1	1	1						matumbela	0	1	0	0	0	0	0	0
3386	151	14	2003	4	2	2003-04-02	14	0	0.335417		0	11		1	1	2	36.8	0				matumbela	4	0	0	0	0	1	0	1
3374	149	14	2003	4	3	2003-04-03	14	0	0.364583	3926	0	4		1	1	1			2			Furvela	4	0	0	0	0	1	0	1								hospital
3369	148	14	2003	4	4	2003-04-04	14	0	0.336806	3931	0	2		1	1	2	38.4	1	2			Furvela	4	0	0	0	0	1	0	1											r
3349	146	14	2003	4	4	2003-04-04	14	0	0.359722	3070	1			1	1	1	40.4	1	2			jogo	0	1	0	0	0	0	0	0								Hospital
3351	146	14	2003	4	4	2003-04-04	14	9	9		0	8		1	1	1			3			jogo	0	1	0	0	0	0	0	0
3354	147	14	2003	4	4	2003-04-04	14	0	0.433333		0	7		1	1	1	37.6	1	4			maputo	0	1	0	0	0	0	0	0
760	27	13	2004	3	29	2004-03-29	14	0	0.388194	6213	0	3		1	1	1	37.1	0	2			Jogo	4	0	0	0	0	1	0	1
761	27	13	2004	3	29	2004-03-29	14	0	0.420139	4715	0	8		1	1	1	38.2	1	3			Furvela	4	0	0	0	0	1	0	1
757	27	13	2004	3	29	2004-03-29	14	0	0.371528	1855	0	6		1	1	2						Jogo	1	0	1	0	0	0	0	1
763	27	13	2004	3	29	2004-03-29	14	0	0.419444	4745	0	9		1	1							Furvela	0	1	0	0	0	0	0	0
771	27	13	2004	3	30	2004-03-30	14	0	0.413194	6215	0	1		1	1	2	35.7	0	2			Furvela	1	0	1	0	0	0	0	1
773	27	13	2004	3	30	2004-03-30	14	0	0.418056	3888	1			1	1	1	38.4	1	2			Furvela	3	0	0	0	1	0	0	1			1
769	27	13	2004	3	30	2004-03-30	14	0	0.40625	4448	0	8		1	1	1						Furvela	0	1	0	0	0	0	0	0			0	0
776	27	13	2004	3	31	2004-03-31	14	8	8	6216	0	9		1	1	1	39.7	1	3			Furvela	4	0	0	0	0	1	0	1
1119	40	14	2004	4	1	2004-04-01	14	0	0.336111	4743	0	7		1	1	2	39.1	1	2			Matumbela	1	0	1	0	0	0	0	1
1125	40	14	2004	4	1	2004-04-01	14	0	0.417361	6207	0	5		1	1	2	37.9	1	2			Matumbela	4	0	0	0	0	1	0	1
1123	40	14	2004	4	1	2004-04-01	14	0	0.408333		0	2		1	1	2						Jogo	0	1	0	0	0	0	0	0
1129	40	14	2004	4	2	2004-04-02	14	0	0.371528	4390	0	11		1	1	1			2			Furvela	0	1	0	0	0	0	0	0
1126	40	14	2004	4	2	2004-04-02	14	0	0.357639		0	4		1	1	1	36.8	0	3			C. Maputo	0	1	0	0	0	0	0	0
1128	40	14	2004	4	2	2004-04-02	14	0	0.336806	4516	0	11		1	1	1	39.1	1	3			Furvela	1	0	1	0	0	0	0	1
5698	230	13	2008	3	31	2008-03-31	14	11:30:00	11:30:00	7154	0	9		1	1	2	37.9	1	2			Furvela	4	0	0	0	0	1	0	1
5693	230	13	2008	3	31	2008-03-31	14	9?	9?	8011	0	6		1	1	1						matumbela	0	1	0	0	0	0	0	0			0	4
5484	224	14	2008	4	1	2008-04-01	14	09:30:00	09:30:00	8015	1			1	1	2	37.3	0	2			jogo	4	0	0	0	0	1	0	1
5489	224	14	2008	4	1	2008-04-01	14	11?	11?	8017	0	6		1	1	2	37.9	1				Furvela	4	0	0	0	0	1	0	1
5495	224	14	2008	4	2	2008-04-02	14	10:15:00	10:15:00	7736	0	8		1	1	1	38.2	1	2			jogo	3	0	0	0	1	0	0	1
5491	224	14	2008	4	2	2008-04-02	14	09:00:00	09:00:00	8018	0	6		1	1	2	36.6	0	4			h maputo	4	0	0	0	0	1	0	1			1
5504	224	14	2008	4	3	2008-04-03	14	11:30:00	11:30:00	8026	0	8		1	1	2	40	1	2			jogo	5	0	0	0	0	0	1	1
3358	147	14	2003	4	7	2003-04-07	15	0	0.347917	3637	0	1		1	1	1			2			jogo	0	1	0	0	0	0	0	0
3360	147	14	2003	4	7	2003-04-07	15	0	0.399306	3938	0	3		1	1	1	37.1	0	7			chiguelane	4	0	0	0	0	1	0	1
3299	140	15	2003	4	8	2003-04-08	15	0	0.482639	2797	0	6		1	1	1			2			nharrumbo	0	1	0	0	0	0	0	0
3314	142	15	2003	4	8	2003-04-08	15			3945	0	3		1	1	2			2			Furvela	0	0	0	0	0	0	0	0
3315	142	15	2003	4	8	2003-04-08	15	0	0.366667	3946	0	4		1	1	2			2			Furvela	5	0	0	0	0	0	1	1
3332	144	15	2003	4	8	2003-04-08	15	0	0.40625	3950	0	4		1	1	2	37.1	0	2			jogo	5	0	0	0	0	0	1	1
3333	144	15	2003	4	8	2003-04-08	15	0	0.378472	3951	0	4		1	1	1			2			Furvela	4	0	0	0	0	1	0	1
3313	141	15	2003	4	8	2003-04-08	15	0	0.459028	3956	0.0575342			1	1	1	38.7	1	2			Huwa	0	1	0	0	0	0	0	0
3320	142	15	2003	4	8	2003-04-08	15	0	0.392361	3390	0	5		1	1	1						jogo	0	1	0	0	0	0	0	0
3294	139	15	2003	4	9	2003-04-09	15	0	0.376389	3964	0	6		1	1	1	36.4	0	2			chidanga	3	0	0	0	1	0	0	1
3296	139	15	2003	4	9	2003-04-09	15	0	0.415278	3966	0	2		1	1	1			2			Furvela	4	0	0	0	0	1	0	1
3305	140	15	2003	4	9	2003-04-09	15	0	0.336111	3715	1			1	1	2	41	1	2			jogo	0	0	0	0	0	0	0	0
3266	136	15	2003	4	10	2003-04-10	15	0	0.418056	3949	0	6		1	1	2			2			lihuwa	0	1	0	0	0	0	0	0
3271	136	15	2003	4	10	2003-04-10	15	0	0.46875	3969	0	4		1	1	2			2			jogo	0	1	0	0	0	0	0	0
3280	137	15	2003	4	10	2003-04-10	15	0	0.422917	3957	0	6		1	1	1	37.4	0	2			matumbela	0	0	0	0	0	0	0	0
3251	134	15	2003	4	11	2003-04-11	15	0	0.447917		0	5		1	1	1			2			jogo	4	0	0	0	0	1	0	1
3261	135	15	2003	4	11	2003-04-11	15	0	0.375694	3413	0	6		1	1	2			3			matumbela	0	1	0	0	0	0	0	0
3264	135	15	2003	4	11	2003-04-11	15	0	0.400694	3974	0	4		1	1	1	37.4	0	3			Furvela	4	0	0	0	0	1	0	1
3259	135	15	2003	4	11	2003-04-11	15	0	0.334722		1			1	1	1			3			Furvela	0	1	0	0	0	0	0	0
3265	135	15	2003	4	11	2003-04-11	15	0	0.40625	3844	0	5		1	1	2						jogo	0	1	0	0	0	0	0	0
1133	40	14	2004	4	5	2004-04-05	15	0	0.359028	6219	0	7		1	1	1	38.8	1	4			Jogo	3	0	0	0	1	0	0	1
1140	40	14	2004	4	6	2004-04-06	15	0	0.336111	6221	0	9		1	1		39.2	1	2			Inhabundo	1	0	1	0	0	0	0	1
1144	40	14	2004	4	6	2004-04-06	15	0	0.378472	4706	0	9		1	1	1			2			Jogo	3	0	0	0	1	0	0	1
1145	40	14	2004	4	6	2004-04-06	15	0	0.411806	6223	0	5		1	1	1			2			Vala	3	0	0	0	1	0	0	1
1146	40	14	2004	4	6	2004-04-06	15	10	10	6224	0	5		1	1	2			2			Jogo	3	0	0	0	1	0	0	1			0	0
1147	40	14	2004	4	6	2004-04-06	15	0	0.434028	4715	0	9		1	1	1			2			Furvela	1	0	1	0	0	0	0	1
1142	40	14	2004	4	6	2004-04-06	15	0	0.372222	6216	0	9		1	1	2	37.5	1	5			Furvela	3	0	0	0	1	0	0	1
1092	39	15	2004	4	8	2004-04-08	15	0	0.40625		0	8		1	1	1	37.9	1	2			Jogo	1	0	1	0	0	0	0	1
1091	39	15	2004	4	8	2004-04-08	15	0	0.394444		0	6		1	1	2						Furvela	1	0	1	0	0	0	0	1
1096	39	15	2004	4	9	2004-04-09	15	10	10		0	7		1	1	2			2			Furvela	4	0	0	0	0	1	0	1
1093	39	15	2004	4	9	2004-04-09	15	0	0.334028	6428	0	3		1	1	2			3			Furvela	1	0	1	0	0	0	0	1
5449	223	15	2008	4	9	2008-04-09	15	09:24:00	09:24:00	7913	0	6		1	1	2			2			Furvela	0	1	0	0	0	0	0	0
5448	223	15	2008	4	9	2008-04-09	15	09:14:00	09:14:00	7572	1			1	1	2	39.4	1				Furvela	5	0	0	0	0	0	1	1
5453	223	15	2008	4	10	2008-04-10	15	10:34:00	10:34:00	8030	0	6		1	1	2	36.3	0				Furvela	0	1	0	0	0	0	0	0
5457	223	15	2008	4	11	2008-04-11	15	09:11:00	09:11:00	7677	0	9		1	1	1	36.9	0				jogo	4	0	0	0	0	1	0	1								hospital
3234	132	15	2003	4	14	2003-04-14	16	0	0.3875	3888	0	3		1	1	1	36.4	0	2			nharrumbo	5	0	0	0	0	0	1	1
3237	132	15	2003	4	14	2003-04-14	16	0	0.399306	3670	0	6		1	1	1	39.1	1	2			jogo	4	0	0	0	0	1	0	1
3255	134	15	2003	4	14	2003-04-14	16	0	0.336806	3976	0	6		1	1	1	39.1	1	2			Furvela	4	0	0	0	0	1	0	1
3243	133	15	2003	4	14	2003-04-14	16	0	0.456944		1			1	1	2	39.4	1	2			iharrime	4	0	0	0	0	1	0	1			1
3235	132	15	2003	4	14	2003-04-14	16	0	0.376389	3333	0	8		1	1	2			3			Furvela	3	0	0	0	1	0	0	1
3218	130	16	2003	4	15	2003-04-15	16	0	0.334028	3987	0	2		1	1	2	36.8	0	2			Furvela	0	1	0	0	0	0	0	0
3222	130	16	2003	4	15	2003-04-15	16	0	0.370139	3990	0	4		1	1	2	38.1	1	2			Furvela	4	0	0	0	0	1	0	1
3231	131	16	2003	4	15	2003-04-15	16	0	0.419444	3900	0	10		1	1	1	37.1	0	2			matumbela	0	1	0	0	0	0	0	0
3232	131	16	2003	4	15	2003-04-15	16	0	0.447917	2101	0	2		1	1	2	39	1	5			jogo	1	0	1	0	0	0	0	1
3205	128	16	2003	4	16	2003-04-16	16	0	0.413194	4000	0	4		1	1	1	37.1	0	2			Furvela	5	0	0	0	0	0	1	1
3211	129	16	2003	4	16	2003-04-16	16	0	0.294444	3995	0	10		1	1	1	37.5	1	2			jogo	4	0	0	0	0	1	0	1
3212	129	16	2003	4	16	2003-04-16	16			3996	0	10		1	1	2	38.9	1	2			matumbela	0	0	0	0	0	0	0	0			0	3	0
3214	129	16	2003	4	16	2003-04-16	16	0	0.336111	3132	0	11		1	1	1	37.3	0	4		TR	xidanga	4	0	0	0	0	1	0	1
3200	127	16	2003	4	17	2003-04-17	16	0	0.456944	3716	0	5		1	1	1			2			jogo	4	0	0	0	0	1	0	1
3195	127	16	2003	4	17	2003-04-17	16	0	0.334028	4001	0	5		1	1	2						2nhabundo	3	0	0	0	1	0	0	1
3192	126	16	2003	4	18	2003-04-18	16	0	0.422222	3528	0	6		1	1	2	38	1	2			matumbela	3	0	0	0	1	0	0	1
1102	39	15	2004	4	12	2004-04-12	16	0	0.41875	4759	1			1	1	1	38	1	3			Inharumbo	3	0	0	0	1	0	0	1			0	0
1110	39	15	2004	4	12	2004-04-12	16	0	0.504861	4808	0	6		1	1	1						Furvela	4	0	0	0	0	1	0	1
1114	39	15	2004	4	13	2004-04-13	16	0	0.463194	6232	0	3		1	1	1	34.4		2			Jogo	3	0	0	0	1	0	0	1			0	0
1150	41	16	2004	4	15	2004-04-15	16	0	0.419444	6164	0	4		1	1	1			3			Furvela	4	0	0	0	0	1	0	1
1151	41	16	2004	4	15	2004-04-15	16	0	0.461111	6235	0	6		1	1	1						Furvela	3	0	0	0	1	0	0	1
5460	223	15	2008	4	14	2008-04-14	16	10:01:00	10:01:00	8026	0	9		1	1	2						jogo	0	1	0	0	0	0	0	0
5477	223	16	2008	4	16	2008-04-16	16	1900-01-09 13:12:00	1900-01-09 13:12:00	8034	0	9		1	1	2	40.6	1				jogo	4	0	0	0	0	1	0	1
5478	223	16	2008	4	16	2008-04-16	16	10:20:00	10:20:00	7846	0	7		1	1	1	39.1	1				jogo	5	0	0	0	0	0	1	1
3165	123	17	2003	4	23	2003-04-23	17	0	0.411806		0	6		1	1	1	38.1	1	3			Furvela	3	0	0	0	1	0	0	1
3168	123	17	2003	4	24	2003-04-24	17	0	0.334028	4021	0	2		1	1	2			2			jogo	3	0	0	0	1	0	0	1
3155	122	17	2003	4	24	2003-04-24	17	0	0.336111	3475	1			1	1	2			3			jogo	3	0	0	0	1	0	0	1
3154	121	17	2003	4	25	2003-04-25	17	0	0.392361	3937	0	2		1	1	1	39.7	1	3			Furvela	4	0	0	0	0	1	0	1			0	0
1161	42	16	2004	4	19	2004-04-19	17	0	0.352083	6241	0	4		1	1	2	39	1	2			Jogo	3	0	0	0	1	0	0	1
1164	42	16	2004	4	19	2004-04-19	17	0	0.417361	6148	0	6		1	1	2	37.6	1	2			Vala	4	0	0	0	0	1	0	1			0	0
1168	42	16	2004	4	20	2004-04-20	17	0	0.385417	6244	0	5		1	1	2						Jogo	4	0	0	0	0	1	0	1
1179	42	16	2004	4	21	2004-04-21	17	0	0.496528	4647	0	11		1	1	1			2			Matumbela	1	0	1	0	0	0	0	1
1171	42	16	2004	4	21	2004-04-21	17	0	0.294444	4869	0	6		1	1	2	36.8	0				Jogo	0	1	0	0	0	0	0	0
1172	42	16	2004	4	21	2004-04-21	17	0	0.322222	6246	0	8		1	1	1						Tinga-Tinga	5	0	0	0	0	0	1	1
1174	42	16	2004	4	21	2004-04-21	17	0	0.375694	6100	0	6		1	1	1						Jogo	0	1	0	0	0	0	0	0
1177	42	16	2004	4	21	2004-04-21	17	0	0.447222		0	8		1	1	1						Jogo	1	0	1	0	0	0	0	1								hospital
1180	42	17	2004	4	22	2004-04-22	17	0	0.334028		0	8		1	1	2						Jogo	3	0	0	0	1	0	0	1
5431	222	16	2008	4	21	2008-04-21	17	09:45:00	09:45:00	7913	0	6		1	1	1			2			jogo	2	0	0	1	0	0	0	1
5430	222	16	2008	4	21	2008-04-21	17	09:25:00	09:25:00	8040	0	11		1	1	2	37	0				bovane	5	0	0	0	0	0	1	1								hospital
5440	222	17	2008	4	22	2008-04-22	17	10:20:00	10:20:00	7806	0	7		1	1	2	39.4	1	2			Furvela	5	0	0	0	0	0	1	1			0	1	0
5442	222	17	2008	4	22	2008-04-22	17	10:57:00	10:57:00		1			1	1	1						Furvela	0	1	0	0	0	0	0	0								hospital
5382	221	17	2008	4	23	2008-04-23	17	11:00:00	11:00:00	7761	0	7		1	1	2	39.4	1	3				0	1	0	0	0	0	0	0
5444	222	17	2008	4	23	2008-04-23	17	08:44:00	08:44:00	7846	0	7		1	1	2						jogo	2	0	0	1	0	0	0	1
5446	222	17	2008	4	23	2008-04-23	17	10:20:00	10:20:00	8034	0	7		1	1	2						jogo	0	1	0	0	0	0	0	0			0	0
5395	221	17	2008	4	25	2008-04-25	17	09:55:00	09:55:00	8046	0	3		1	1	2	36.6	0	2			jogo	0	0	0	0	0	0	0	1
5400	221	17	2008	4	25	2008-04-25	17	11:04:00	11:04:00	8049	1			1	1	1	37.8	1	3			Furvela	2	0	0	1	0	0	0	1
3129	118	17	2003	4	28	2003-04-28	18	0	0.491667	3334	0	3		1	1	2	38.8	1	2			balavala	5	0	0	0	0	0	1	1
3136	119	17	2003	4	28	2003-04-28	18	0	0.376389	3792	0	6		1	1	1	39.4	1	2			mahangue	5	0	0	0	0	0	1	1
3130	118	17	2003	4	28	2003-04-28	18				0	9		1	1	2						Furvela	0	1	0	0	0	0	0	0
3135	119	17	2003	4	28	2003-04-28	18	0	0.363889	4037	0	3		1	1	2						Furvela	0	1	0	0	0	0	0	0
3094	114	18	2003	4	30	2003-04-30	18	0	0.440972	4046	0	4		1	1	2	37.1	0	2			jogo	3	0	0	0	1	0	0	1
3086	113	18	2003	5	1	2003-05-01	18	0	0.345833	4049	0	11		1	1	2			2			matumbela	0	1	0	0	0	0	0	0
3088	113	18	2003	5	1	2003-05-01	18	0	0.413194		0	9		1	1	1	38.4	1	3			Furvela	3	0	0	0	1	0	0	1
3069	112	18	2003	5	2	2003-05-02	18	0	0.465972	3132	0	11		1	1	1			3			Furvela	0	1	0	0	0	0	0	0
1075	38	18	2004	4	29	2004-04-29	18	0	0.336806	1722	0	10		1	1	1	37.8	1				Furvela	3	0	0	0	1	0	0	1
1082	38	18	2004	4	30	2004-04-30	18	0	0.343056		1			1	1	1			2			Jogo	3	0	0	0	1	0	0	1
5403	221	17	2008	4	28	2008-04-28	18	09:31:00	09:31:00	8051	0	10		1	1	2			2			Furvela	5	0	0	0	0	0	1	1
5375	220	18	2008	4	30	2008-04-30	18	09:34:00	09:34:00	7947	0	5		1	1	1	38	1	2			h homoine	0	1	0	0	0	0	0	0
3724	165	18	2008	5	2	2008-05-02	18	0	0.379167	8055	0	8		1	1	1	40.2	1	2			Furvela	5	0	0	0	0	0	1	1				3				hospital
3728	165	18	2008	5	2	2008-05-02	18	0	0.465972	8026	0	7		1	1	2	38.8	1	2			jogo	1	0	1	0	0	0	0	1
3725	165	18	2008	5	2	2008-05-02	18	0	0.392361	8056	1			1	1	2	38.2	1	3			jogo	5	0	0	0	0	0	1	1
3723	165	18	2008	5	2	2008-05-02	18	0	0.357639	7806	0	7		1	1	2						Furvela	0	1	0	0	0	0	0	0
5118	212	18	2009	4	29	2009-04-29	18	11:18:00	11:18:00	8645	1			1	1	2	37.8	1	2			balavala	4	0	0	0	0	1	0	1
5110	212	18	2009	4	29	2009-04-29	18			8642	0	11		1	1	2	39.1	1	3			beula	5	0	0	0	0	0	1	1
5112	212	18	2009	4	29	2009-04-29	18	10:19:00	10:19:00	8643	0	7		1	1	1						jogo	3	0	0	0	1	0	0	1
5121	212	18	2009	4	29	2009-04-29	18	11:54:00	11:54:00	8383	0	7		1	1	2						jogo	0	1	0	0	0	0	0	0
5116	212	18	2009	4	29	2009-04-29	18	11:07:00	11:07:00	8644	1			1	1	1						Furvela	0	1	0	0	0	0	0	0
3076	112	18	2003	5	5	2003-05-05	19	0	0.394444	4059	0	4		1	1	1			2			nharrumbo	1	0	1	0	0	0	0	1
3080	112	18	2003	5	5	2003-05-05	19	0	0.409028	4063	0	2		1	1	1	36.2	0	2			xidanga	1	0	1	0	0	0	0	1
3036	111	19	2003	5	6	2003-05-06	19	0	0.397917	4072	0	2		1	1	2	37.9	1	2			jogo	0	1	0	0	0	0	0	0
3037	111	19	2003	5	6	2003-05-06	19	0	0.40625	3042	1			1	1	2	39.7	1	2			jogo	5	0	0	0	0	0	1	1
3030	111	19	2003	5	6	2003-05-06	19	0	0.363889	4065	0	8		1	1	2			4			nhalivala	4	0	0	0	0	1	0	1
3049	111	19	2003	5	7	2003-05-07	19	0	0.420139	3539	0	8		1	1	1	39.4	1	2			jogo	3	0	0	0	1	0	0	1
3016	110	19	2003	5	8	2003-05-08	19	0	0.422222	4079	0	4		1	1	2	38.1	1	3			Furvela	5	0	0	0	0	0	1	1
3023	110	19	2003	5	9	2003-05-09	19	0	0.371528	4037	0	4		1	1	2	39.5	1	2			bovane	3	0	0	0	1	0	0	1
1297	47	18	2004	5	3	2004-05-03	19	0	0.379167		0	6		1	1	1	39.6	1	2	control		Jogo	0	1	0	0	0	0	0	0
1300	47	18	2004	5	3	2004-05-03	19	0	0.392361	6241	0	5		1	1	1	38.2	1	2			Matumbela	1	0	1	0	0	0	0	1
1298	47	18	2004	5	3	2004-05-03	19	0	0.385417	6075	0	7		1	1	2	36.5	0	3			Furvela	3	0	0	0	1	0	0	1
1306	47	18	2004	5	4	2004-05-04	19	0	0.336111	5027	0	6		1	1	1	38.6	1	3			Furvela	4	0	0	0	0	1	0	1
1313	47	18	2004	5	5	2004-05-05	19	0	0.386111	4675	0	7		1	1	1	39.6	1	2			Furvela	5	0	0	0	0	0	1	1
3734	165	18	2008	5	5	2008-05-05	19	0	0.378472	8058	0	8		1	1	2	38.5	1	2			nharrumbo	4	0	0	0	0	1	0	1
3738	165	18	2008	5	5	2008-05-05	19	0	0.396528	8051	0	11		1	1	2			2			Furvela	0	1	0	0	0	0	0	0
3750	165	19	2008	5	6	2008-05-06	19	0	0.385417	7545	1			1	1	2			3			matumbela	3	0	0	0	1	0	0	1			0	0
3751	165	19	2008	5	6	2008-05-06	19	0	0.403472	7590	0	11		1	1	1						Furvela	0	1	0	0	0	0	0	0
3789	167	19	2008	5	7	2008-05-07	19	0	0.379167	8059	0	8		1	1	1	38.4	1	2			Furvela	3	0	0	0	1	0	0	1
3801	167	19	2008	5	9	2008-05-09	19	0	0.427083	8011	0	8		1	1	2						Furvela	1	0	1	0	0	0	0	1
5084	211	18	2009	5	5	2009-05-05	19	09:31:00	09:31:00	8651	0	5		1	1	2			14			jogo	0	1	0	0	0	0	0	0
5085	211	18	2009	5	5	2009-05-05	19	10:00:00	10:00:00	8652	0	8		1	1	2	38.8	1				matumbela	5	0	0	0	0	0	1	1
5097	211	19	2009	5	6	2009-05-06	19	09:45:00	09:45:00	8654	0	3		1	1	1	37.6	1	4			jogo	1	0	1	0	0	0	0	1
2958	108	19	2003	5	12	2003-05-12	20	0	0.40625	3669	0	8		1	1	2			3			Furvela	1	0	1	0	0	0	0	1			0	0							resistente
2947	108	19	2003	5	12	2003-05-12	20	0	0.295139	4084	0	9		1	1	1	39.1	1	21			Furvela	4	0	0	0	0	1	0	1
2962	108	19	2003	5	12	2003-05-12	20	0	0.420139	3915	0	5		1	1	1	40.9	1				Furvela	0	1	0	0	0	0	0	0			0	0
2973	108	20	2003	5	13	2003-05-13	20	0	0.435417	4094	0	4		1	1	1			2			Furvela	1	0	1	0	0	0	0	1
2974	109	20	2003	5	13	2003-05-13	20	0	0.4625	4095	0	11		1	1	2			6			matumbela	4	0	0	0	0	1	0	1
2978	109	20	2003	5	14	2003-05-14	20	0	0.336806	4099	0	9		1	1	1			2			xidanga	4	0	0	0	0	1	0	1
2982	109	20	2003	5	14	2003-05-14	20	0	0.377083	4100	0	9		1	1	1	36.6	0	2			jogo	3	0	0	0	1	0	0	1
2980	109	20	2003	5	14	2003-05-14	20	0	0.378472	4071	0	3		1	1	2					TR	jogo	5	0	0	0	0	0	1	1
2986	109	20	2003	5	14	2003-05-14	20	0	0.440972	4101	0	3		1	1	1						xidanga	0	0	0	0	0	0	0	0
2989	109	20	2003	5	15	2003-05-15	20	0	0.336111	4102	0	8		1	1	1			2			matumbela	0	1	0	0	0	0	0	0
2990	109	20	2003	5	15	2003-05-15	20	0	0.384722		0	10		1	1	2			2			Furvela	3	0	0	0	1	0	0	1
2991	109	20	2003	5	15	2003-05-15	20	0	0.401389	4079	0	4		1	1	2			2			Furvela	5	0	0	0	0	0	1	1
1332	48	20	2004	5	13	2004-05-13	20	0	0.413194	6219	0	8		1	1	1	37.5	1	2			Jogo	3	0	0	0	1	0	0	1
1334	48	20	2004	5	13	2004-05-13	20	0	0.496528	1855	0	7		1	1	2	37.7	1	2			Furvela	5	0	0	0	0	0	1	1
1339	48	20	2004	5	14	2004-05-14	20	0	0.440972	1722	0	11		1	1	1	39.3	1	2			Furvela	1	0	1	0	0	0	0	1
3806	167	19	2008	5	12	2008-05-12	20	0	0.386111	8056	1			1	1	2						jogo	0	1	0	0	0	0	0	0
3826	168	20	2008	5	13	2008-05-13	20	0	0.4125	7336	0	10		1	1	2	36.6	0	2			Furvela	0	1	0	0	0	0	0	0
3821	168	20	2008	5	13	2008-05-13	20	0	0.371528	8066	0	8		1	1	1	39.2	1	3			jogo	3	0	0	0	1	0	0	1						587	38
3824	168	20	2008	5	13	2008-05-13	20	0	0.403472	8067	0	6		1	1	1	36	0				jogo	0	1	0	0	0	0	0	0
3840	168	20	2008	5	14	2008-05-14	20	0	0.436806	7607	0	10		1	1	2	37	0	2			jogo	3	0	0	0	1	0	0	1
3841	168	20	2008	5	14	2008-05-14	20	0	0.445139	7656			1	1	1	2			2			nhabundo2	0	1	0	0	0	0	0	0								hospital
3834	168	20	2008	5	14	2008-05-14	20	0	0.391667	8071	0	5		1	1	1						jogo	2	0	0	1	0	0	0	1
5060	210	19	2009	5	11	2009-05-11	20	09:17:00	09:17:00	8283	1			1	1	1	37.7	1				Furvela	0	1	0	0	0	0	0	0
5015	209	19	2009	5	12	2009-05-12	20	11:26:00	11:26:00	8666	0	4		1	1	1	37.7	1	2			Furvela	0	1	0	0	0	0	0	0
5013	209	19	2009	5	12	2009-05-12	20	10:10:00	10:10:00		0	7		1	1	2						Furvela	3	0	0	0	1	0	0	1
5073	210	19	2009	5	12	2009-05-12	20	09:17:00	09:17:00	8665	0	7		1	1	1	37.8	1				jogo	0	0	0	0	0	0	0	1
5022	209	20	2009	5	13	2009-05-13	20	10:27:00	10:27:00	8668	0	4		1	1	1	39.7	1				Furvela	0	1	0	0	0	0	0	0
5037	209	20	2009	5	14	2009-05-14	20	09:54:00	09:54:00	8673	0	1		1	1	2	37.3	0	2			jogo	0	1	0	0	0	0	0	0
5030	209	20	2009	5	14	2009-05-14	20	08:50:00	08:50:00		0	7		1	1	2	39.9	1	3			jogo	2	0	0	1	0	0	0	1
5036	209	20	2009	5	14	2009-05-14	20	09:50:00	09:50:00	8672	0	4		1	1	1	37.1	0	3			balavala	4	0	0	0	0	1	0	1
5039	209	20	2009	5	14	2009-05-14	20	10:16:00	10:16:00	8509	1			1	1	2						jogo	0	1	0	0	0	0	0	0			0	3	0
2926	107	20	2003	5	19	2003-05-19	21	0	0.385417		0	9		1	1	1			2			matumbela	5	0	0	0	0	0	1	1			0	0
2927	107	20	2003	5	19	2003-05-19	21	0	0.429167	3674	0	7		1	1	2	37.1	0	2			Furvela	5	0	0	0	0	0	1	1
2929	107	20	2003	5	19	2003-05-19	21	0	0.461806		0	9		1	1	2			2			jogo	3	0	0	0	1	0	0	1
2930	107	20	2003	5	19	2003-05-19	21	0	0.54375	4109	0	5		1	1	1			2			muengue	0	1	0	0	0	0	0	0
3003	109	20	2003	5	19	2003-05-19	21	0	0.385417	4107	0	9		1	1	2			3			matumbela	3	0	0	0	1	0	0	1
2998	109	20	2003	5	19	2003-05-19	21	0	0.351389	3889	0	4		1	1	2						Furvela	4	0	0	0	0	1	0	1
2935	107	21	2003	5	20	2003-05-20	21	0	0.369444	4146	0	5		1	1	1	39.5	1	3			matumbela	0	1	0	0	0	0	0	0
2945	107	21	2003	5	20	2003-05-20	21	0	0.46875	3286	0	10		1	1	2						Furvela	0	1	0	0	0	0	0	0
2937	107	21	2003	5	20	2003-05-20	21	0	0.376389	3003	1			1	1	1						Furvela	4	0	0	0	0	1	0	1
2901	106	21	2003	5	21	2003-05-21	21	0	0.427083	3619	0	9		1	1	2						Furvela	1	0	1	0	0	0	0	1
2908	106	21	2003	5	22	2003-05-22	21	0	0.3875	4119	0	8		1	1	2	37.1	0	2			Furvela	4	0	0	0	0	1	0	1			0	0
2868	105	21	2003	5	23	2003-05-23	21	0	0.453472	4128	0	8		1	1	1	38.8	1	2			mbatane	4	0	0	0	0	1	0	1
2919	106	21	2003	5	23	2003-05-23	21	0	0.371528	4124	0	9		1	1	2	36.8	0	2			mapinhane	0	1	0	0	0	0	0	0			0	0
2921	106	21	2003	5	23	2003-05-23	21	0	0.377083	4125	0	3		1	1	2			21			jogo	0	1	0	0	0	0	0	0
2866	105	21	2003	5	23	2003-05-23	21	0	0.41875	4126	0	11		1	1	1						Furvela	1	0	1	0	0	0	0	1			0	0
1341	48	20	2004	5	17	2004-05-17	21	0	0.334722	6215	0	3		1	1	2	36.6	0	2			Furvela	0	1	0	0	0	0	0	0
1343	48	20	2004	5	17	2004-05-17	21	0	0.417361		0	11		1	1	2	37.5	1	2			Furvela	3	0	0	0	1	0	0	1			0	0
1348	48	20	2004	5	18	2004-05-18	21	0	0.363889		0	7		1	1	1						Furvela	0	1	0	0	0	0	0	0			0	0
1349	48	20	2004	5	18	2004-05-18	21	0	0.336806	6075	0	7		1	1	2						Furvela	0	1	0	0	0	0	0	0
1272	46	21	2004	5	21	2004-05-21	21	0	0.370139	4695	0	7		1	1	2	35.6	0	2			Vala	0	1	0	0	0	0	0	0						404	510
5006	208	20	2009	5	18	2009-05-18	21	11:00:00	11:00:00	8424	0	9		1	1	1	38.7	1	2			Furvela	5	0	0	0	0	0	1	1
4957	207	20	2009	5	19	2009-05-19	21	11?	11?	8685	0	10		1	1	1	38	1	2			Furvela	1	0	1	0	0	0	0	1
4949	207	20	2009	5	19	2009-05-19	21	09:03:00	09:03:00	8665	0	9		1	1	1						jogo	0	1	0	0	0	0	0	0					1
4952	207	20	2009	5	19	2009-05-19	21	10:21:00	10:21:00	8683	0	4		1	1	2						Furvela	0	1	0	0	0	0	0	0
4962	207	20	2009	5	19	2009-05-19	21	11:49:00	11:49:00	8688	0	1		1	1	2						Furvela	0	1	0	0	0	0	0	0												pf(+) TRAP
4964	207	21	2009	5	20	2009-05-20	21	08:41:00	08:41:00	8334	0	9		1	1	2			2			matumbela	0	1	0	0	0	0	0	0
4967	207	21	2009	5	20	2009-05-20	21	11:04:00	11:04:00	8689	0	3		1	1	2	37.6	1	2			jogo	0	1	0	0	0	0	0	0				1
4918	206	21	2009	5	21	2009-05-21	21	11:04:00	11:04:00	8433	0	11		1	1	1			2			matumbela	0	0	0	0	0	0	0	1			0	3
4976	207	21	2009	5	21	2009-05-21	21			8277	0	10		1	1	2	39.9	1	2			Furvela	1	0	1	0	0	0	0	1			0	0
4916	206	21	2009	5	21	2009-05-21	21	10:28:00	10:28:00	8692	0	5		1	1	1	36.6	0				jogo	3	0	0	0	1	0	0	1
4920	206	21	2009	5	21	2009-05-21	21	11:27:00	11:27:00	8693	0	3		1	1	1						Furvela	0	1	0	0	0	0	0	0
4928	206	21	2009	5	22	2009-05-22	21	11:35:00	11:35:00	8574	0	9		1	1	2						Furvela	0	1	0	0	0	0	0	0
2873	105	21	2003	5	26	2003-05-26	22	0	0.371528	4110	0	4		1	1	2						Furvela	3	0	0	0	1	0	0	1
2894	105	22	2003	5	27	2003-05-27	22	0	0.418056	4109	0	5		1	1	2						Furvela	0	1	0	0	0	0	0	0
2839	104	22	2003	5	28	2003-05-28	22	0	0.377083	3767	0	7		1	1	2			2			matumbela	5	0	0	0	0	0	1	1
2842	104	22	2003	5	28	2003-05-28	22	0	0.417361		0	9		1	1	1						matumbela	3	0	0	0	1	0	0	1
2821	103	22	2003	5	29	2003-05-29	22	0	0.480556	4152	0	11		1	1	2			2			lihuwa	1	0	1	0	0	0	0	1
2859	104	22	2003	5	29	2003-05-29	22	0	0.417361	4148	0	8		1	1	2			2			Furvela	5	0	0	0	0	0	1	1
2863	104	22	2003	5	29	2003-05-29	22	0	0.41875	4079	0	4		1	1	2	39	1	3			jogo	4	0	0	0	0	1	0	1
2822	103	22	2003	5	29	2003-05-29	22	0	0.461111	4119	0	8		1	1	2						Furvela	1	0	1	0	0	0	0	1
1284	46	21	2004	5	25	2004-05-25	22	9	9	4448	0	10		1	1	1			2			Jogo	3	0	0	0	1	0	0	1											r
1286	46	21	2004	5	25	2004-05-25	22	0	0.4125		1			1	1	2			2			Matumbela	4	0	0	0	0	1	0	1
1292	46	22	2004	5	27	2004-05-27	22	0	0.417361		0	9		1	1	1	36.6	0	3			Jogo	4	0	0	0	0	1	0	1
1250	45	22	2004	5	28	2004-05-28	22	0	0.363194	4604	0	9		1	1	2	38.6	1	2			Matumbela	4	0	0	0	0	1	0	1			0	0
1255	45	22	2004	5	28	2004-05-28	22	0	0.440972	6100	0	7		1	1	2						Jogo	0	1	0	0	0	0	0	0								hospital
1258	45	22	2004	5	28	2004-05-28	22	0	0.461111	4706	0	10		1	1	2	35.6	0				Furvela	0	1	0	0	0	0	0	0
4945	206	21	2009	5	25	2009-05-25	22	11:21:00	11:21:00	8702	0	6		1	1	1			2			Furvela	4	0	0	0	0	1	0	1
4889	205	21	2009	5	26	2009-05-26	22	09:38:00	09:38:00	8704	0	7		1	1	1			2			Furvela	5	0	0	0	0	0	1	1
4891	205	21	2009	5	26	2009-05-26	22	09:52:00	09:52:00	8549	0	8		1	1	1			2			matumbela	2	0	0	1	0	0	0	1
4884	205	21	2009	5	26	2009-05-26	22	09:05:00	09:05:00	8182	0	9		1	1	2	35.6	0				jogo	0	1	0	0	0	0	0	0
4907	205	22	2009	5	27	2009-05-27	22	09:51:00	09:51:00	8499	1			1	1	1			2			jogo	3	0	0	0	1	0	0	1			0	0
4903	205	22	2009	5	27	2009-05-27	22	08:31:00	08:31:00	8707	0	11		1	1	2			30			m`bene	0	1	0	0	0	0	0	0			0	0
2796	102	22	2003	6	2	2003-06-02	23	0	0.475694	4162	0	6		1	1	1	37	0	2			jogo	5	0	0	0	0	0	1	1			0	0
2794	102	22	2003	6	2	2003-06-02	23	0	0.425	3777	0	7		1	1	1			3			Furvela	3	0	0	0	1	0	0	1
2814	102	23	2003	6	4	2003-06-04	23	0	0.378472	3889	0	5		1	1	2	36.9	0	2			Furvela	4	0	0	0	0	1	0	1
2757	101	23	2003	6	4	2003-06-04	23	0	0.484722	3937	0	4		1	1	2			3			muengue	4	0	0	0	0	1	0	1			0	0
2770	101	23	2003	6	5	2003-06-05	23	0	0.459028	3333	0	11		1	1	1	38	1	2			Furvela	3	0	0	0	1	0	0	1
2772	101	23	2003	6	5	2003-06-05	23	0	0.48125	4177	0	3		1	1	2	38.2	1	2			jogo	5	0	0	0	0	0	1	1			0	0
2767	101	23	2003	6	5	2003-06-05	23	0	0.436111		0	10		1	1	1	38.5	1				jogo	4	0	0	0	0	1	0	1
2777	101	23	2003	6	6	2003-06-06	23	0	0.355556	4181	0	2		1	1	1	36.8	0	2			balavala	1	0	1	0	0	0	0	1
2775	101	23	2003	6	6	2003-06-06	23	0	0.334722	4180	0	8		1	1	2			30			Furvela	1	0	1	0	0	0	0	1			0	0
1264	45	22	2004	5	31	2004-05-31	23	0	0.465972	1855	0	8		1	1	2						Furvela	0	1	0	0	0	0	0	0
1265	45	22	2004	5	31	2004-05-31	23	0	0.477778	4695	0	7		1	1	2						Vala	0	1	0	0	0	0	0	0
1360	49	22	2004	6	1	2004-06-01	23	11	11		0	10		1	1	1	36.1	0	2			Furvela	4	0	0	0	0	1	0	1
1358	49	22	2004	6	1	2004-06-01	23	0	0.4	1722	0	11		1	1	2	36.4	0	4			Furvela	3	0	0	0	1	0	0	1
1357	49	22	2004	6	1	2004-06-01	23	0	0.377083	6263	0	5		1	1	2						Ucucho	0	1	0	0	0	0	0	0			0	0
1367	49	22	2004	6	2	2004-06-02	23	0	0.377778		1			1	1	2	38.9	1				Furvela	0	1	0	0	0	0	0	0
1378	49	23	2004	6	4	2004-06-04	23	0	0.378472	6269	0	8		1	1	2	37.9	1	2			Inharrumbo	0	1	0	0	0	0	0	0			0	0
2736	100	23	2003	6	9	2003-06-09	24	0	0.421528	3888	0	5		1	1	1			2			jogo	3	0	0	0	1	0	0	1
2739	100	23	2003	6	9	2003-06-09	24	0	0.468056	3900	1			1	1	1	37.1	0	2			matumbela	3	0	0	0	1	0	0	1
2732	100	23	2003	6	9	2003-06-09	24	0	0.385417	4187	0	4		1	1	2	36.5	0	3			balavala	0	1	0	0	0	0	0	0
2738	100	23	2003	6	9	2003-06-09	24	11	11	4190	0	11		1	1	1	37	0				Furvela	1	0	1	0	0	0	0	1
2742	100	24	2003	6	10	2003-06-10	24	0	0.336806		0	6		1	1	1			2			chibaela	3	0	0	0	1	0	0	1			0	0
2699	99	24	2003	6	10	2003-06-10	24	0	0.41875		0	3		1	1	2	36.9	0	3			jogo	4	0	0	0	0	1	0	1
2718	99	24	2003	6	11	2003-06-11	24	0	0.434028	3649	0	10		1	1	1	36.9	0	2			jogo	0	1	0	0	0	0	0	0
2636	97	24	2003	6	12	2003-06-12	24	0	0.377778	4101	0	4		1	1	1	38.4	1	2			balavala	0	1	0	0	0	0	0	0
2637	97	24	2003	6	12	2003-06-12	24	0	0.413194	4214	0	2		1	1	2	36.1	0	2			matumbela	3	0	0	0	1	0	0	1
2638	97	24	2003	6	12	2003-06-12	24	0	0.418056	4046	0	6		1	1	1	38.5	1	2			Furvela	3	0	0	0	1	0	0	1											resistente
2645	97	24	2003	6	12	2003-06-12	24	0	0.461806	4079	0	4		1	1	2	38.9	1	2			balavala	4	0	0	0	0	1	0	1
2641	97	24	2003	6	12	2003-06-12	24	0	0.476389	4215	0	1		1	1	1	38.5	1	4			jogo	0	1	0	0	0	0	0	0
2723	99	24	2003	6	12	2003-06-12	24	0	0.346528	4162	0	7		1	1	2						mahangue	0	1	0	0	0	0	0	0
2649	97	24	2003	6	13	2003-06-13	24	0	0.413194	3390	0	8		1	1	2	39.1	1	2			matumbela	3	0	0	0	1	0	0	1
2653	97	24	2003	6	13	2003-06-13	24	0	0.45		0	6		1	1	1	38	1	2			Furvela	4	0	0	0	0	1	0	1
2654	97	24	2003	6	13	2003-06-13	24	11	11	3747	1			1	1	2	37.6	1				matumbela	4	0	0	0	0	1	0	1
1381	49	23	2004	6	7	2004-06-07	24	0	0.431944		0	11		1	1	2						Furvela	0	1	0	0	0	0	0	0
1388	50	23	2004	6	8	2004-06-08	24	0	0.399306	6271	0	4		1	1	2	37.9	1	2			Jogo	3	0	0	0	1	0	0	1			0	0
1385	49	23	2004	6	8	2004-06-08	24	9	9		0	8		1	1	1			3			Jogo	0	1	0	0	0	0	0	0			0	0
1391	50	23	2004	6	9	2004-06-09	24	0	0.335417	6263	0	5		1	1	1	36.4	0	2			Gaza	0	1	0	0	0	0	0	0
1394	50	23	2004	6	9	2004-06-09	24	0	0.384028	6263	1			1	1	2						Xibaela	0	1	0	0	0	0	0	0
1401	50	24	2004	6	11	2004-06-11	24	0	0.439583	4715	0	11		1	1	1	35.8	0	2			Jogo	0	1	0	0	0	0	0	0
1400	50	24	2004	6	11	2004-06-11	24	0	0.426389		0	10		1	1	1						Matumbela	0	1	0	0	0	0	0	0
2658	97	24	2003	6	16	2003-06-16	25	0	0.358333	4221	0	6		1	1	1			2			jogo	3	0	0	0	1	0	0	1
2663	97	24	2003	6	16	2003-06-16	25	0	0.411806	1688	0	5		1	1	1	36.8	0	2			bovane	4	0	0	0	0	1	0	1
2671	98	24	2003	6	16	2003-06-16	25	0	0.459722	4225	0	2		1	1	2			2			jogo	3	0	0	0	1	0	0	1
2667	98	24	2003	6	16	2003-06-16	25	0	0.440972	362	1			1	1	2	36	0	4			jogo	3	0	0	0	1	0	0	1
2680	98	25	2003	6	17	2003-06-17	25	0	0.455556	3767	0	8		1	1	2	37	0	2			matumbela	4	0	0	0	0	1	0	1
2681	98	25	2003	6	17	2003-06-17	25	0	0.461806	4229	0	10		1	1	1			3			Furvela	3	0	0	0	1	0	0	1
2673	98	25	2003	6	17	2003-06-17	25	0	0.365972	4226	0	10		1	1	2						Furvela	0	1	0	0	0	0	0	0			0	1
2676	98	25	2003	6	17	2003-06-17	25	0	0.377083	4228	0	4		1	1	2	37.3	0				bovane	1	0	1	0	0	0	0	1
2605	96	25	2003	6	18	2003-06-18	25	0	0.460417	4190	0	11		1	1	1			2			jogo	3	0	0	0	1	0	0	1
2693	98	25	2003	6	18	2003-06-18	25	0	0.440972	4232	0	2		1	1	1	37.2	0	2			Furvela	3	0	0	0	1	0	0	1
2694	98	25	2003	6	18	2003-06-18	25	0	0.419444	4233	0	4		1	1	2	36.6	0	2			jogo	1	0	1	0	0	0	0	1
2608	96	25	2003	6	19	2003-06-19	25	0	0.365278	3838	0	5		1	1	2						Furvela	1	0	1	0	0	0	0	1
1404	50	24	2004	6	14	2004-06-14	25	9	9	6277	0	8		1	1	2	35.8	0	1			Jogo	3	0	0	0	1	0	0	1
1405	50	24	2004	6	14	2004-06-14	25	0	0.417361	6278	0	2		1	1	1	36.9	0				Furvela	0	1	0	0	0	0	0	0
1409	50	24	2004	6	15	2004-06-15	25	0	0.399306	6057	0	9		1	1	1	39.3	1				Jogo	3	0	0	0	1	0	0	1
1422	51	25	2004	6	18	2004-06-18	25	0	0.4	6075	0	8		1	1	2	36.8	0	2			Furvela	3	0	0	0	1	0	0	1
1425	51	25	2004	6	18	2004-06-18	25	10	10	6100	0	8		1	1	2	38.1	1	2			Jogo	0	1	0	0	0	0	0	0								hospital
1424	51	25	2004	6	18	2004-06-18	25	0	0.413194	6263	0	6		1	1	1	39.1	1	3			Furvela	5	0	0	0	0	0	1	1
2627	96	25	2003	6	23	2003-06-23	26	0	0.371528	4107	0	10		1	1	2	38.2	1	2			Furvela	5	0	0	0	0	0	1	1
1435	51	25	2004	6	22	2004-06-22	26			6278	0	2		1	1	1	38.2	1	2			Jogo	4	0	0	0	0	1	0	1
2598	95	26	2003	6	30	2003-06-30	27	0	0.418056	4079	0	5		1	1	1	36.8	0	2			vilanculos	1	0	1	0	0	0	0	1
2602	95	26	2003	6	30	2003-06-30	27	0	0.475694		0	6		1	1	1			2			Furvela	5	0	0	0	0	0	1	1
2603	95	26	2003	6	30	2003-06-30	27	0	0.482639		0	6		1	1	1	40.6	1	3			Furvela	3	0	0	0	1	0	0	1
2559	94	27	2003	7	1	2003-07-01	27	0	0.336806		0	7		1	1	1	37.2	0	2			chibaela	0	1	0	0	0	0	0	0
2561	94	27	2003	7	1	2003-07-01	27	0	0.379167	4109	0	7		1	1	1	39	1	2			muengue	5	0	0	0	0	0	1	1			0	0
2563	94	27	2003	7	1	2003-07-01	27	0	0.377083	4246	0	3		1	1	2	37.8	1	2			beula	4	0	0	0	0	1	0	1											r
2572	94	27	2003	7	2	2003-07-02	27	0	0.436806	4252	0	8		1	1	1	39.5	1	3			matumbela	1	0	1	0	0	0	0	1
2586	94	27	2003	7	3	2003-07-03	27	0	0.0194444		0	3		1	1	1	37.6	1	2			pambara	4	0	0	0	0	1	0	1
2587	94	27	2003	7	3	2003-07-03	27	0	0.454861	4259	0	9		1	1	2	36.8	0	3		TR	jogo	3	0	0	0	1	0	0	1
2531	93	27	2003	7	4	2003-07-04	27	0	0.427083	4262	0	7		1	1	1	38	1	3			jogo	4	0	0	0	0	1	0	1
1443	51	26	2004	6	28	2004-06-28	27	0	0.376389	4875	0	11		1	1	1	36	0	3			mapinhane	1	0	1	0	0	0	0	1
1457	52	26	2004	6	30	2004-06-30	27	0	0.377778	6057	0	9		1	1	1						Jogo	0	1	0	0	0	0	0	0
1461	53	27	2004	7	1	2004-07-01	27	0	0.376389	6296	1			1	1	1	38.1	1	2			Jogo	1	0	1	0	0	0	0	1
1465	53	27	2004	7	1	2004-07-01	27	11	11	4448	0	11		1	1	1	37.1	0	5			Jogo	0	1	0	0	0	0	0	0
3987	174	27	2008	7	1	2008-07-01	27	09:18:00	09:18:00	7607	1			1	1	2	37.3	0	2		TR	Furvela	4	0	0	0	0	1	0	1
4011	174	27	2008	7	4	2008-07-04	27	10:20:00	10:20:00	8163	0	9		1	1	1	37.6	1	2			Furvela	3	0	0	0	1	0	0	1
4832	203	26	2009	6	29	2009-06-29	27	09:31:00	09:31:00	8704	0	8		1	1	1	39.9	1	3			Furvela	4	0	0	0	0	1	0	1
4835	203	26	2009	6	29	2009-06-29	27	09:54:00	09:54:00	8763	0	8		1	1	1	36.5	0				Furvela	3	0	0	0	1	0	0	1
4842	203	26	2009	6	30	2009-06-30	27	09:12:00	09:12:00	8702	0	7		1	1	1	36.4	0				matumbela	0	1	0	0	0	0	0	0
4845	203	26	2009	6	30	2009-06-30	27	10:55:00	10:55:00	8766	1			1	1	2	39.1	1				balavala	5	0	0	0	0	0	1	1
4812	202	27	2009	7	2	2009-07-02	27	11:38:00	11:38:00	8768	0	9		1	1	1	38.6	1	3			jogo	3	0	0	0	1	0	0	1
4807	202	27	2009	7	2	2009-07-02	27	10:06:00	10:06:00	8767	0	6		1	1	1	36.4	0	14			jogo	0	1	0	0	0	0	0	0								hospital
2537	93	27	2003	7	7	2003-07-07	28	0	0.376389	4265	0	5		1	1	2			2			xidanga	1	0	1	0	0	0	0	1
2540	93	27	2003	7	7	2003-07-07	28	0	0.420139	4266	0	8		1	1	2	38.8	1	2			Furvela	5	0	0	0	0	0	1	1
2544	93	28	2003	7	8	2003-07-08	28	0	0.377778	555	0	7		1	1	2			2			Furvela	1	0	1	0	0	0	0	1
2545	93	28	2003	7	8	2003-07-08	28	0	0.378472	4270	0	5		1	1	2	40	1	5			Furvela	1	0	1	0	0	0	0	1
2514	92	28	2003	7	10	2003-07-10	28	0	0.440972	4252	0	9		1	1	1	36.7	0				matumbela	0	1	0	0	0	0	0	0
2515	92	28	2003	7	10	2003-07-10	28	0	0.46875	4109	0	7		1	1	1	37	0				muengue	0	1	0	0	0	0	0	0
1476	53	27	2004	7	5	2004-07-05	28	0	0.377083	6228	0	6		1	1	1			2			Gaza	3	0	0	0	1	0	0	1								hospital
1482	53	27	2004	7	6	2004-07-06	28	0	0.378472	6302	0	3		1	1	1	38.8	1	1			Furvela	0	1	0	0	0	0	0	0
1486	53	28	2004	7	9	2004-07-09	28	10	10	1101	1			1	1	2	37.3	0	2			Furvela	4	0	0	0	0	1	0	1
4024	175	28	2008	7	8	2008-07-08	28	08:50:00	08:50:00	7806	0	10		1	1	1	39.2	1	2			Furvela	4	0	0	0	0	1	0	1
4033	175	28	2008	7	8	2008-07-08	28	11:00:00	11:00:00	8089	0	10		1	1	1	37.7	1	2			Furvela	2	0	0	1	0	0	0	1
4034	175	28	2008	7	8	2008-07-08	28	11:42:00	11:42:00	7971	0	10		1	1	2	37.3	0	2			Furvela	0	1	0	0	0	0	0	0
4035	175	28	2008	7	8	2008-07-08	28	11:50:00	11:50:00	8168	0	2		1	1	1			2			manhala	0	1	0	0	0	0	0	0
4822	202	27	2009	7	6	2009-07-06	28	09:51:00	09:51:00		1			1	1	1						matumbela	0	1	0	0	0	0	0	0
4777	201	27	2009	7	7	2009-07-07	28	11:00:00	11:00:00	8766	1			1	1	2						balavala	0	1	0	0	0	0	0	0
4789	201	28	2009	7	9	2009-07-09	28	10:00:00	10:00:00		0	4		1	1	1	38.1	1	1			Furvela	4	0	0	0	0	1	0	1
4733	200	28	2009	7	10	2009-07-10	28	09:12:00	09:12:00	8776	0	6		1	1	1	36.7	0	2			matumbela	3	0	0	0	1	0	0	1
2470	91	28	2003	7	14	2003-07-14	29	0	0.373611	4291	0	2		1	1	2	36	0	2			jogo	0	1	0	0	0	0	0	0
2465	91	28	2003	7	14	2003-07-14	29	0	0.345139	3535	0	7		1	1	1	36.2	0	3			matumbela	5	0	0	0	0	0	1	1
2484	91	29	2003	7	15	2003-07-15	29	11	11	4246	0	7		1	1	2			6			Furvela	3	0	0	0	1	0	0	1
2442	90	29	2003	7	17	2003-07-17	29	0	0.41875		0	4		1	1	1	38	1	2			balavala	3	0	0	0	1	0	0	1								hospital
2445	90	29	2003	7	17	2003-07-17	29	0	0.460417	3767	0	9		1	1	1			2			matumbela	3	0	0	0	1	0	0	1
2490	91	29	2003	7	17	2003-07-17	29	8	8	4298	0	5		1	1	1	37.6	1	2			Furvela	4	0	0	0	0	1	0	1								hospital
2441	90	29	2003	7	17	2003-07-17	29	0	0.417361	4190	1			1	1	1			2			Furvela	5	0	0	0	0	0	1	1
2492	91	29	2003	7	17	2003-07-17	29	0	0.359722	280	1			1	1	2			2			jogo	0	1	0	0	0	0	0	0
2435	90	29	2003	7	17	2003-07-17	29	0	0.385417	4300	0	2		1	1	2	38.6	1	3			matumbela	3	0	0	0	1	0	0	1
2443	90	29	2003	7	17	2003-07-17	29	0	0.440972		0	6		1	1	2						Furvela	1	0	1	0	0	0	0	1
2453	90	29	2003	7	18	2003-07-18	29	0	0.419444	4232	0	4		1	1	2						jogo	0	1	0	0	0	0	0	0			0	0
1491	54	28	2004	7	12	2004-07-12	29	1032	1032	4695	0	9		1	1	2						Vala	1	0	1	0	0	0	0	1
1498	54	29	2004	7	15	2004-07-15	29	0	0.393056	6302	0	3		1	1	1						Matumbela	4	0	0	0	0	1	0	1
1502	54	29	2004	7	16	2004-07-16	29	8	8		0	8		1	1	2	38.1	1	1			Jogo	3	0	0	0	1	0	0	1
4056	176	28	2008	7	14	2008-07-14	29	08:49:00	08:49:00		0	10		1	1	2			2			Furvela	0	1	0	0	0	0	0	0
4075	176	29	2008	7	17	2008-07-17	29			8182	0	3		1	1	1						jogo	0	1	0	0	0	0	0	0
4079	177	29	2008	7	19	2008-07-19	29			8184	0	4		1	1	1	35.6	0	2			jogo	0	1	0	0	0	0	0	0
4081	177	29	2008	7	19	2008-07-19	29	11:00:00	11:00:00	8185	0	5		1	1	1	38.4	1				matumbela	0	1	0	0	0	0	0	0
4741	200	28	2009	7	13	2009-07-13	29	10:10:00	10:10:00	8777	0	11		1	1	2	36.1	0				matumbela	0	1	0	0	0	0	0	0
4701	199	29	2009	7	15	2009-07-15	29	08:31:00	08:31:00		0	7		1	1	2			14			jogo	0	1	0	0	0	0	0	0
4716	199	29	2009	7	16	2009-07-16	29	10:07:00	10:07:00	8730	0	9		1	1	1						Furvela	5	0	0	0	0	0	1	1
4717	199	29	2009	7	16	2009-07-16	29	10:33:00	10:33:00	8783	0	10		1	1	2	36.7	0				jogo	5	0	0	0	0	0	1	1
4721	199	29	2009	7	16	2009-07-16	29		11?	8563	1			1	1	1	36.9	0				jogo	0	1	0	0	0	0	0	0
4724	199	29	2009	7	17	2009-07-17	29			8520	0	10		1	1	2	37.7	1	2			jogo	1	0	1	0	0	0	0	1			0	0
2456	90	29	2003	7	21	2003-07-21	30	0	0.335417	3260	0	10		1	1	1			2			jogo	3	0	0	0	1	0	0	1
2460	90	29	2003	7	21	2003-07-21	30	0	0.390278	3880	0	8		1	1	2	40.1	1	2			jogo	4	0	0	0	0	1	0	1			0	0
2409	89	30	2003	7	22	2003-07-22	30	0	0.415278		1			1	1	2	36.1	0	4			Furvela	3	0	0	0	1	0	0	1			0	0
2414	89	30	2003	7	22	2003-07-22	30	0	0.461111	3500	1			1	1	2	36.8	0				Furvela	1	0	1	0	0	0	0	1			0	0
2425	89	30	2003	7	23	2003-07-23	30	0	0.454861		0	10		1	1	2			2			Furvela	5	0	0	0	0	0	1	1
2431	89	30	2003	7	24	2003-07-24	30	0	0.385417	4228	0	5		1	1	1	36.6	0	2			Furvela	4	0	0	0	0	1	0	1
2432	89	30	2003	7	24	2003-07-24	30	0	0.376389	3429	1			1	1	2	38.2	1	2			jogo	3	0	0	0	1	0	0	1
2377	88	30	2003	7	24	2003-07-24	30	0	0.461111	4316	0	3		1	1	2						matumbela	0	1	0	0	0	0	0	0
2380	88	30	2003	7	25	2003-07-25	30	0	0.376389	4318	0	3		1	1	1	37	0	2		TR (+)	jogo	5	0	0	0	0	0	1	1
1506	54	29	2004	7	19	2004-07-19	30	0	0.336806	9715	1			1	1	2			2			Furvela	5	0	0	0	0	0	1	1
1511	54	29	2004	7	19	2004-07-19	30	0	0.378472	4695	0	9		1	1	2						Vala	0	1	0	0	0	0	0	0
1507	54	29	2004	7	19	2004-07-19	30	9	9	6311	1			1	1	2						Furvela	5	0	0	0	0	0	1	1
1531	55	30	2004	7	23	2004-07-23	30	0	0.335417	1855	0	10		1	1	1			2			Jogo	0	1	0	0	0	0	0	0
4092	177	30	2008	7	23	2008-07-23	30	10:19:00	10:19:00	7688	0	10		1	1	2	38.5	1	2			matumbela	4	0	0	0	0	1	0	1
4099	177	30	2008	7	24	2008-07-24	30	09:50:00	09:50:00	7677	1			1	1	1						jogo	2	0	0	1	0	0	0	1
4106	177	30	2008	7	25	2008-07-25	30			8192	0	8		1	1	2	38.4	1	2			jogo	4	0	0	0	0	1	0	1
4667	198	29	2009	7	20	2009-07-20	30			8785	0	5		1	1	2	38	1	3			jogo	2	0	0	1	0	0	0	1
4676	198	29	2009	7	20	2009-07-20	30	11:56:00	11:56:00	8786	0	1		1	1	1	38.5	1	4			jogo	0	1	0	0	0	0	0	0
4686	198	29	2009	7	21	2009-07-21	30	10:54:00	10:54:00	8334	0	11		1	1	1	35					Furvela	1	0	1	0	0	0	0	1								hospital
4863	204	30	2009	7	23	2009-07-23	30	11:34:00	11:34:00	8695	0	5		1	1	2	36.5	0	2			Furvela	1	0	1	0	0	0	0	1
4858	204	30	2009	7	23	2009-07-23	30	09:16:00	09:16:00		1			1	1	2	37.3	0	3			Furvela	3	0	0	0	1	0	0	1
4872	204	30	2009	7	24	2009-07-24	30	11:49:00	11:49:00	8528	0	8		1	1	2	36.4	0	2			jogo	3	0	0	0	1	0	0	1
2398	88	30	2003	7	28	2003-07-28	31	0	0.419444	4326	0	10		1	1	2			2		TR	matumbela	4	0	0	0	0	1	0	1
2401	88	30	2003	7	28	2003-07-28	31	0	0.427083	4328	0	10		1	1	2			2			jogo	3	0	0	0	1	0	0	1								hospital
2389	88	30	2003	7	28	2003-07-28	31	0	0.378472	3539	0	11		1	1	2	36	0				balavala	0	1	0	0	0	0	0	0						97	504
2355	87	31	2003	7	30	2003-07-30	31	0	0.411806	4340	0	11		1	1	2						Furvela	1	0	1	0	0	0	0	1
2360	87	31	2003	7	31	2003-07-31	31	0	0.329861	4344	0	5		1	1	2	36.9	0	2			Furvela	3	0	0	0	1	0	0	1
2371	87	31	2003	7	31	2003-07-31	31	0	0.399306	3888	0	6		1	1	2	35.9	0	2			jogo	1	0	1	0	0	0	0	1
1540	55	30	2004	7	27	2004-07-27	31	9	9	6319	0	4		1	1	2	36	0	3			Ucucho	3	0	0	0	1	0	0	1
1542	55	30	2004	7	27	2004-07-27	31	10	10	6320	0	4		1	1	2	36.7	0		control		Furvela	3	0	0	0	1	0	0	1
1549	56	31	2004	7	29	2004-07-29	31	0	0.378472	6324	0	3		1	1	1			2			Matumbela	0	1	0	0	0	0	0	0
4109	178	31	2008	7	29	2008-07-29	31	10:50:00	10:50:00	8193	0	11		1	1	1			2			matumbela	0	1	0	0	0	0	0	0
4120	178/9	31	2008	8	1	2008-08-01	31			8066	0	11		1	1	2	37.1	0	14			Furvela	0	1	0	0	0	0	0	0
4633	196	31	2009	7	29	2009-07-29	31	10:40:00	10:40:00	8791	0	7		1	1	1	37.1	0	5			lihuwa	0	1	0	0	0	0	0	0
4639	196	31	2009	7	30	2009-07-30	31	09:28:00	09:28:00		0	9		1	1	2						jogo	4	0	0	0	0	1	0	1
4643	196	31	2009	7	31	2009-07-31	31	09:40:00	09:40:00		1			1	1	2						Furvela	0	1	0	0	0	0	0	0			0	0
2323	85	32	2003	8	5	2003-08-05	32	0	0.407639	4358	1			1	1	2	40.1	1	3			jogo	0	1	0	0	0	0	0	0
2274	84	32	2003	8	6	2003-08-06	32	0	0.41875	4360	0	2		1	1	2	36.9	0	2			Furvela	0	1	0	0	0	0	0	0
2278	84	32	2003	8	6	2003-08-06	32	0	0.489583	4328	0	11		1	1	1	38.6	1				bovane	4	0	0	0	0	1	0	1
2290	84	32	2003	8	8	2003-08-08	32	9	9	3889	0	7		1	1	2			2			matumbela	0	1	0	0	0	0	0	0			0	0				hospital		urgente
1563	57	31	2004	8	4	2004-08-04	32	0	0.375694	4715	1			1	1	2			14			Furvela	0	1	0	0	0	0	0	0
1571	57	32	2004	8	5	2004-08-05	32	0	0.461806	6321	0	5		1	1	1	36	0	2			Gaza	0	1	0	0	0	0	0	0
1575	57	32	2004	8	6	2004-08-06	32	0	0.45		0	11		1	1	1			2			Furvela	3	0	0	0	1	0	0	1
4653	196	31	2009	8	3	2009-08-03	32	09:50:00	09:50:00		1			1	1	1	37	0	1			Furvela	4	0	0	0	0	1	0	1
4599	195	31	2009	8	4	2009-08-04	32	09:54:00	09:54:00	8660	0	10		1	1	2	37.3	0	2			jogo	3	0	0	0	1	0	0	1			0	0
4608	195	32	2009	8	5	2009-08-05	32	09:46:00	09:46:00	8673	0	4		1	1	1			2			jogo	0	1	0	0	0	0	0	0
4609	195	32	2009	8	5	2009-08-05	32	10:00:00	10:00:00	8798	0	5		1	1	1	36.6	0	3			jogo	1	0	1	0	0	0	0	1
4607	195	32	2009	8	5	2009-08-05	32	09:40:00	09:40:00		1			1	1	2						Furvela	0	1	0	0	0	0	0	0
4619	195	32	2009	8	6	2009-08-06	32	08:54:00	08:54:00	8468	0	11		1	1	2	36.6	0	2			Furvela	1	0	1	0	0	0	0	1
4621	195	32	2009	8	6	2009-08-06	32	09:19:00	09:19:00	8672	0	7		1	1	2	38	1				matumbela	3	0	0	0	1	0	0	1
2244	83	33	2003	8	12	2003-08-12	33	0	0.336806	3767	0	10		1	1	1	36.6	0	2			matumbela	1	0	1	0	0	0	0	1
2241	83	33	2003	8	12	2003-08-12	33	0	0.334722		1			1	1	2			2			Furvela	3	0	0	0	1	0	0	1			0	3	0
2243	83	33	2003	8	12	2003-08-12	33	0	0.363889	4369	0	6		1	1	2	36	0	3			jogo	3	0	0	0	1	0	0	1
2251	83	33	2003	8	13	2003-08-13	33	0	0.385417	3830	0	7		1	1	2	39.4	1	2			jogo	1	0	1	0	0	0	0	1			0	0
2264	83	33	2003	8	14	2003-08-14	33	0	0.465972	4374	0	11		1	1	1	37	0	2			matumbela	1	0	1	0	0	0	0	1
2261	83	33	2003	8	14	2003-08-14	33	0	0.405556	4360	0	3		1	1	2	35.9	0				Furvela	4	0	0	0	0	1	0	1
2262	83	33	2003	8	14	2003-08-14	33	0	0.440278	4358	1			1	1	2						jogo	3	0	0	0	1	0	0	1
2268	83	33	2003	8	15	2003-08-15	33	0	0.392361	4376	0	1		1	1	1	39	1	1			Jogo	0	1	0	0	0	0	0	0
2267	83	33	2003	8	15	2003-08-15	33	9	9	4375	0	6		1	1	1	36.8	0	4			jogo	4	0	0	0	0	1	0	1
1581	57	32	2004	8	9	2004-08-09	33	11	11	6329	0	3		1	1	1			2			Jogo	4	0	0	0	0	1	0	1
1587	58	32	2004	8	10	2004-08-10	33	0	0.399306	6331	0	11		1	1	1	35.6	0	2			Jogo	3	0	0	0	1	0	0	1
4575	194	32	2009	8	10	2009-08-10	33	09:16:00	09:16:00	8592	0	11		1	1	2						matumbela	0	1	0	0	0	0	0	0
4548	193	33	2009	8	12	2009-08-12	33			8733	0	5		1	1	2			2			Furvela	3	0	0	0	1	0	0	1
4553	193	33	2009	8	12	2009-08-12	33			8672	0	7		1	1	2						Furvela	0	1	0	0	0	0	0	0
4561	193	33	2009	8	13	2009-08-13	33			8809	0	9		1	1	1	36.2	0	2			jogo	0	1	0	0	0	0	0	0
4557	193	33	2009	8	13	2009-08-13	33	09:49:00	09:49:00	8808	0	5		1	1	2	36	0	3			jogo	3	0	0	0	1	0	0	1
4507	192	33	2009	8	14	2009-08-14	33	09:58:00	09:58:00		0	6		1	1	1	38.3	1	3			jogo	0	1	0	0	0	0	0	0
2214	82	33	2003	8	18	2003-08-18	34	0	0.351389		1			1	1	1			3			Furvela	4	0	0	0	0	1	0	1
2237	82	34	2003	8	21	2003-08-21	34	0	0.38125		0	6		1	1	1	37.1	0	2				1	0	1	0	0	0	0	1
2239	82	34	2003	8	21	2003-08-21	34	0	0.411806	4233	0	6		1	1	2			2			jogo	5	0	0	0	0	0	1	1
2183	81	34	2003	8	22	2003-08-22	34	0	0.399306	4390	0	3		1	1	2	39.2	1	2			Furvela	4	0	0	0	0	1	0	1
1596	58	33	2004	8	16	2004-08-16	34	0	0.335417	4604	0			1	1	2	39.1	1	3			Matumbela	1	0	1	0	0	0	0	1
1602	58	33	2004	8	17	2004-08-17	34	0	0.427778		1			1	1	1			3			Jogo	3	0	0	0	1	0	0	1
1609	58	34	2004	8	19	2004-08-19	34	0	0.363889	6067	0	11		1	1	1						Jogo	0	1	0	0	0	0	0	0
1612	58	34	2004	8	19	2004-08-19	34	0	0.461111	6335	0	10		1	1							Furvela	0	1	0	0	0	0	0	0
2189	81	34	2003	8	25	2003-08-25	35	0	0.419444	4392	0	6		1	1	1	36.7	0	2			nharrumbo	3	0	0	0	1	0	0	1				3				hospital
2192	81	35	2003	8	26	2003-08-26	35	0	0.357639	4393	0	4		1	1	2	40	1	2			matumbela	4	0	0	0	0	1	0	1
2196	81	35	2003	8	26	2003-08-26	35	0	0.434722	3396	0	11		1	1	1			2			jogo	4	0	0	0	0	1	0	1
2197	81	35	2003	8	26	2003-08-26	35	0	0.419444	4396	0	8		1	1	2	35.8	0	2			jogo	3	0	0	0	1	0	0	1
2176	80	35	2003	8	29	2003-08-29	35	0	0.359722	4250	0	10		1	1	2	37.6	1	1			maxixe	5	0	0	0	0	0	1	1
2177	80	35	2003	8	29	2003-08-29	35	0	0.419444		0	9		1	1	2			2			jogo	3	0	0	0	1	0	0	1								hospital
1619	59	34	2004	8	23	2004-08-23	35	0	0.295139	6336	0	10		1	1	1			2			C. Maputo	5	0	0	0	0	0	1	1
1624	59	34	2004	8	23	2004-08-23	35	0	0.376389	6263	0	8		1	1	1	36.2	0	2			Furvela	4	0	0	0	0	1	0	1
1621	59	34	2004	8	23	2004-08-23	35	0	0.357639	6338	0	5		1	1	1						Furvela	0	1	0	0	0	0	0	0
1629	59	34	2004	8	24	2004-08-24	35	0	0.377778	6131	0	7		1	1	1			2			Matumbela	3	0	0	0	1	0	0	1
1640	59	35	2004	8	26	2004-08-26	35	11	11	6345	0	6		1	1	1	37.7	1	2				4	0	0	0	0	1	0	1
1641	60	35	2004	8	26	2004-08-26	35	0	0.491667		0	7		1	1	1			2			Furvela	1	0	1	0	0	0	0	1
1639	59	35	2004	8	26	2004-08-26	35	0	0.419444	6344	1			1	1	1						Jogo	3	0	0	0	1	0	0	1
2150	79	35	2003	9	1	2003-09-01	36	0	0.377083		0	7		1	1	1			3			Furvela	1	0	1	0	0	0	0	1
2157	79	36	2003	9	2	2003-09-02	36	9	9	4410	0	6		1	1	2	36.4	0	2			matumbela	4	0	0	0	0	1	0	1
2159	79	36	2003	9	2	2003-09-02	36	0	0.459722		0	8		1	1	1	39.4	1	2			bovane	4	0	0	0	0	1	0	1
2163	79	36	2003	9	3	2003-09-03	36	0	0.350694	4414	0	6		1	1	1	39.6	1	3			Furvela	3	0	0	0	1	0	0	1
2162	79	36	2003	9	3	2003-09-03	36	0	0.345833	3844	0	11		1	1	2	37.4	0	4			matumbela	3	0	0	0	1	0	0	1
2117	78	36	2003	9	4	2003-09-04	36	0	0.455556	3669	1			1	1	2	38.9	1	3			Furvela	1	0	1	0	0	0	0	1
1646	60	35	2004	8	30	2004-08-30	36			1981	1			1	1	1	39.4	1	3			Furvela	4	0	0	0	0	1	0	1
1648	60	35	2004	8	30	2004-08-30	36	9	9	6349	0	2		1	1	1						Jogo	0	1	0	0	0	0	0	0
1651	60	35	2004	8	30	2004-08-30	36	0	0.392361	4604	1			1	1	2						Matumbela	0	1	0	0	0	0	0	0
1655	60	35	2004	8	31	2004-08-31	36	0	0.352083	6215	0	6		1	1	1			3			Jogo	5	0	0	0	0	0	1	1
1658	61	35	2004	9	1	2004-09-01	36	0	0.377083	6351	0	5		1	1	1	37.8	1	2			Jogo	3	0	0	0	1	0	0	1
1662	61	36	2004	9	2	2004-09-02	36	0	0.413194	6335	0	10		1	1	2	36.4	0	2			Furvela	3	0	0	0	1	0	0	1			0	0
2128	78	37	2003	9	9	2003-09-09	37	0	0.357639	4420	0	8		1	1	2						Furvela	3	0	0	0	1	0	0	1
2080	77	37	2003	9	10	2003-09-10	37	0	0.358333	4427	0	7		1	1	2	38	1	2			Furvela	0	1	0	0	0	0	0	0			0	3
2090	77	37	2003	9	11	2003-09-11	37	0	0.3875		0	11		1	1	2	37.1	0	4			jogo	3	0	0	0	1	0	0	1
2099	77	37	2003	9	12	2003-09-12	37	0	0.376389	3888	0	8		1	1	2	36.6	0	2			Furvela	3	0	0	0	1	0	0	1			0	0
3412	154	37	2003	9	12	2003-09-12	37	0	0.363889	4369	0	6		1	1	1			2			nhabanda	5	0	0	0	0	0	1	1
3413	154	37	2003	9	12	2003-09-12	37	0	0.336806	3767	0	10		1	1	2	39.2	1	2			matumbela	3	0	0	0	1	0	0	1
3410	154	37	2003	9	12	2003-09-12	37	0	0.334722		1			1	1	2			2			Furvela	3	0	0	0	1	0	0	1
3420	154	37	2003	9	13	2003-09-13	37	0	0.413194	3830	0	7		1	1	2	39.4	1	2			jogo	1	0	1	0	0	0	0	1			0	0
3430	154	37	2003	9	14	2003-09-14	37	0	0.405556	4360	0	3		1	1	2	39.9	1	2			2nhabundo	4	0	0	0	0	1	0	1
3433	154	37	2003	9	14	2003-09-14	37	0	0.465972	4374	0	11		1	1	2	38.6	1	4			matumbela	1	0	1	0	0	0	0	1
3431	154	37	2003	9	14	2003-09-14	37	0	0.440278	4358	1			1	1	2						jogo	3	0	0	0	1	0	0	1
1675	61	36	2004	9	7	2004-09-07	37	0	0.461111		0	11		1	1	2	38.6	1	2			Matumbela	4	0	0	0	0	1	0	1
1679	61	36	2004	9	8	2004-09-08	37	0	0.383333	6131	0	8		1	1	1			2			Furvela	0	1	0	0	0	0	0	0
1680	61	36	2004	9	8	2004-09-08	37	0	0.386806	6355	0	5		1	1	1	36.6	0	3			Vala	3	0	0	0	1	0	0	1
1685	62	37	2004	9	9	2004-09-09	37	0	0.436111	6345	0	6		1	1	1						Furvela	0	1	0	0	0	0	0	0			3
1687	62	37	2004	9	10	2004-09-10	37	0	0.386111	1858	1			1	1	2	37.5	1	2			Furvela	3	0	0	0	1	0	0	1
3949	172	37	2008	9	10	2008-09-10	37			8198	0	10		1	1	1	39.3	1	2			chibaela	3	0	0	0	1	0	0	1								hospital
3948	172	37	2008	9	10	2008-09-10	37			8108	0	6		1	1	1	36.6	0	9			Tinga-tinga	0	1	0	0	0	0	0	0
3952	172	37	2008	9	11	2008-09-11	37	09:33:00	09:33:00	8199	0	10		1	1	1			2			Furvela	3	0	0	0	1	0	0	1
3954	172	37	2008	9	11	2008-09-11	37	10:12:00	10:12:00		1			1	1	1	37.4	0	2			jogo	3	0	0	0	1	0	0	1
3950	172	37	2008	9	11	2008-09-11	37	08:54:00	08:54:00	7806	1			1	1	2	39	1				Furvela	5	0	0	0	0	0	1	1
3958	172	37	2008	9	12	2008-09-12	37	10:00:00	10:00:00	8202	0	10		1	1	1	37.7	1	3			Furvela	0	1	0	0	0	0	0	0
2101	77	37	2003	9	15	2003-09-15	38	8	8	4432	0	4		1	1	2			2			jogo	5	0	0	0	0	0	1	1
3437	154	37	2003	9	15	2003-09-15	38	0	0.392361	4376	0	1		1	1	2	39.9	1	3				0	1	0	0	0	0	0	0								hospital
3436	154	37	2003	9	15	2003-09-15	38	9	9	4375	0	6		1	1	1	36.8	0	4			jogo	4	0	0	0	0	1	0	1
2058	76	38	2003	9	18	2003-09-18	38	0	0.338889	3830	0	8		1	1	2	38.1	1	2			jogo	3	0	0	0	1	0	0	1
2063	76	38	2003	9	18	2003-09-18	38	0	0.413889	3669	1			1	1	2			2			Furvela	0	1	0	0	0	0	0	0
2072	76	38	2003	9	19	2003-09-19	38	0	0.405556	4444	0	9		1	1	1	37.8	1	2			Furvela	0	0	0	0	0	0	0	0
1697	62	37	2004	9	13	2004-09-13	38	12	12	6360	0	9		1	1	1	38.4	1	2			Furvela	1	0	1	0	0	0	0	1			0	0
1698	62	37	2004	9	14	2004-09-14	38	0	0.386111	6331	1			1	1	1	38.2	1	2			Jogo	0	1	0	0	0	0	0	0			0	0
1706	62	37	2004	9	15	2004-09-15	38	0	0.419444	5068	0	10		1	1	1						C. Maputo	0	1	0	0	0	0	0	0
1708	62	37	2004	9	15	2004-09-15	38	0	0.4625	6111	0	8		1	1	2	35.3	0				Matumbela	1	0	1	0	0	0	0	1
1709	62	37	2004	9	15	2004-09-15	38	0	0.477083		0	6		1	1	1						Jogo	0	1	0	0	0	0	0	0
1712	63	38	2004	9	16	2004-09-16	38	0	0.41875	6364	0	4		1	1	2	36	0	2	control		Furvela	0	1	0	0	0	0	0	0
1714	63	38	2004	9	17	2004-09-17	38	9	9		0	10		1	1	2	39.5	1	2			Matumbela	4	0	0	0	0	1	0	1
3961	172	37	2008	9	15	2008-09-15	38	08:55:00	08:55:00	8203	0	3		1	1	2	37.1	0	2			jogo	0	1	0	0	0	0	0	0
3924		38	2008	9	17	2008-09-17	38	10:04:00	10:04:00	8211	0	5		1	1	2	36.6	0				Furvela	3	0	0	0	1	0	0	1
2014	75	38	2003	9	22	2003-09-22	39	0	0.325	4445	0	3		1	1	1	38.4	1	2			Vala	3	0	0	0	1	0	0	1
2017	75	38	2003	9	22	2003-09-22	39	8	8	4432	0	4		1	1	1	36.4	0	2			unguana	0	1	0	0	0	0	0	0
2024	75	38	2003	9	22	2003-09-22	39	0	0.336111	4448	0	2		1	1	2	36.1	0	2			Jogo	3	0	0	0	1	0	0	1
2030	75	38	2003	9	22	2003-09-22	39	0	0.436806	4452	0	4		1	1	2			2			Furvela	5	0	0	0	0	0	1	1
2031	75	38	2003	9	22	2003-09-22	39	11	11	4233	0	7		1	1	2	37.5	1	2			balavala	4	0	0	0	0	1	0	1
2026	75	38	2003	9	22	2003-09-22	39	0	0.400694	4063	0	7		1	1	1	37.9	1	3			Furvela	5	0	0	0	0	0	1	1
2020	75	38	2003	9	22	2003-09-22	39	0	0.344444	4390	0	4		1	1	2			5			matumbela	0	1	0	0	0	0	0	0
2029	75	38	2003	9	22	2003-09-22	39	0	0.426389	4451	0	10		1	1	2						Jogo	0	1	0	0	0	0	0	0								hospital
1992	74	39	2003	9	26	2003-09-26	39	0	0.363889	4458	0	4		1	1	1			2			Bovane	4	0	0	0	0	1	0	1
1716	63	38	2004	9	20	2004-09-20	39	9	9	6366	0	3		1	1	2	36.8	0	2			Furvela	0	1	0	0	0	0	0	0
1727	63	38	2004	9	22	2004-09-22	39	0	0.336806	6371	0	2		1	1	2	36.3	0	3			Furvela	3	0	0	0	1	0	0	1
1725	63	38	2004	9	22	2004-09-22	39	0	0.344444	6370	0	6		1	1	2						Matumbela	0	1	0	0	0	0	0	0
1728	63	38	2004	9	22	2004-09-22	39	0	0.392361	6164	0	9		1	1	2	36.3	0				Jogo	1	0	1	0	0	0	0	1			0	0
1733	63	39	2004	9	23	2004-09-23	39	0	0.419444	6373	0	3		1	1	1	38.4	1	2			Bovane	4	0	0	0	0	1	0	1			3		1
3890	170	38	2008	9	22	2008-09-22	39	10:55:00	10:55:00		1			1	1	1	39.6	1	1			Furvela	4	0	0	0	0	1	0	1
3884	170	38	2008	9	22	2008-09-22	39	09:25:00	09:25:00	8168	0	4		1	1	2	37.1	0	3			jogo	3	0	0	0	1	0	0	1
3879	170	38	2008	9	22	2008-09-22	39	08:44:00	08:44:00	8071	0	9		1	1	1	40.7	1	4			jogo	3	0	0	0	1	0	0	1
3891	170	39	2008	9	23	2008-09-23	39	08:50:00	08:50:00	8219	0	10		1	1	2	36.4	0	2			Furvela	2	0	0	1	0	0	0	1
3906	170	39	2008	9	23	2008-09-23	39	11:11:00	11:11:00	8225	1			1	1	1	37.9	1	2			Furvela	2	0	0	1	0	0	0	1
4523	192	38	2009	9	22	2009-09-22	39	09:31:00	09:31:00	8767	0	8		1	1	1	38	1				Furvela	4	0	0	0	0	1	0	1
4527	192	39	2009	9	23	2009-09-23	39	09:10:00	09:10:00	8742	0	7		1	1	2	39.2	1	2			Furvela	2	0	0	1	0	0	0	1
4526	192	39	2009	9	23	2009-09-23	39	08:50:00	08:50:00	8817	0	6		1	1	2	37.4	0				Furvela	3	0	0	0	1	0	0	1
4662	197	39	2009	9	24	2009-09-24	39	10:58:00	10:58:00	8821	0	5		1	1	1	39.4	1	2			jogo	3	0	0	0	1	0	0	1
2003	74	39	2003	9	29	2003-09-29	40	0	0.335417		0	11		1	1	1	37.4	0	1			Jogo	0	1	0	0	0	0	0	0
2011	74	39	2003	9	29	2003-09-29	40	0	0.463194	4466	0	6		1	1	1	35		2			Matumbela	3	0	0	0	1	0	0	1
2005	74	39	2003	9	29	2003-09-29	40	0	0.377778	4465	1			1	1	2	40.2	1	3			paindane	0	1	0	0	0	0	0	0
1981	73	40	2003	9	30	2003-09-30	40	0	0.419444	4468	0.0246575			1	1	1	38.3	1	2			matumbela	0	1	0	0	0	0	0	0
1982	73	40	2003	9	30	2003-09-30	40	0	0.448611	4063	0	7		1	1	1						Furvela	0	1	0	0	0	0	0	0
1743	64	39	2004	9	27	2004-09-27	40	0	0.420139	6377	0	4		1	1	2	38.5	1	2			Furvela	0	1	0	0	0	0	0	0
1746	64	39	2004	9	27	2004-09-27	40	0	0.454167	4675	0	11		1	1	2			2			Furvela	0	1	0	0	0	0	0	0
1752	64	39	2004	9	28	2004-09-28	40	0	0.447917	6324	0	5		1	1	1	35.6	0				Vala	0	1	0	0	0	0	0	0
1763	64	40	2004	9	30	2004-09-30	40	0	0.405556	4021	0	1		1	1	1	36.4	0	2			Furvela	3	0	0	0	1	0	0	1
1764	64	40	2004	9	30	2004-09-30	40	10	10		0	8		1	1	1						Furvela	0	1	0	0	0	0	0	0
5707	231		2008	9	29	2008-09-29	40				0.7			1		1	361		2			Furvela
5710	231		2008	9	29	2008-09-29	40				0.9			1		1			2	1		jogo	0															hospital
5714	231		2008	9	29	2008-09-29	40				0.9			1								Furvela	3
5720	231		2008	9	30	2008-09-30	40				0.6			1		2	364		2			jogo	0
5721	231		2008	9	30	2008-09-30	40				0.6			1		2	376		2			jogo	0
5730	231		2008	9	30	2008-09-30	40				0.4			1		2	367					Furvela	3
1776	65	40	2004	10	4	2004-10-04	41	0	0.418056	6263	0	9		1	1	1	37.4	0	2			Furvela	0	1	0	0	0	0	0	0
1784	65	40	2004	10	6	2004-10-06	41	0	0.334722	6384	0	11		1	1	1			3			Furvela	4	0	0	0	0	1	0	1
1790	65	41	2004	10	8	2004-10-08	41	9	9	6386	0	4		1	1	1			2			Jogo	0	1	0	0	0	0	0	0
1952	72	41	2004	10	8	2004-10-08	41	0	0.41875	6366	0	4		1	1	2	39.1	1	3			Furvela	4	0	0	0	0	1	0	1
1951	72	41	2004	10	8	2004-10-08	41	0	0.377778		0	8		1	1	2						Nhacoo	0	1	0	0	0	0	0	0			1
5751	232		2008	10	7	2008-10-07	41				0.9			1		2	369		1		s	jogo	4
5747	232		2008	10	7	2008-10-07	41				10m			1		2	390					Furvela	5
1956	72	41	2004	10	11	2004-10-11	42	0	0.378472	6387	0	6		1	1	1	39.3	1	2			Furvela	4	0	0	0	0	1	0	1
1958	72	41	2004	10	11	2004-10-11	42	0	0.411111	6388	0	6		1	1	1	37.7	1	4			furvela	1	0	1	0	0	0	0	1
1963	72	41	2004	10	12	2004-10-12	42	0	0.386111	6391	0	3		1	1	2	36.8	0	3			Jogo	0	1	0	0	0	0	0	0
1966	72	41	2004	10	13	2004-10-13	42	0	0.336111	6336	1			1	1	2	38	1	2			furvela	1	0	1	0	0	0	0	1
1968	72	41	2004	10	13	2004-10-13	42	0	0.401389	6392	0	8		1	1	2	37.6	1	4			furvela	1	0	1	0	0	0	0	1
1794	66	42	2004	10	14	2004-10-14	42	0	0.469444	1920	1			1	1	2	36.7	0	2			Furvela	3	0	0	0	1	0	0	1
1803	66	42	2004	10	18	2004-10-18	43	0	0.448611	5027	0	11		1	1	1	37.7	1	2			Furvela	3	0	0	0	1	0	0	1
1806	66	42	2004	10	19	2004-10-19	43	0	0.35625	6131	0	9		1	1	1	36.4	0	3		s	Furvela	0	1	0	0	0	0	0	0
1812	66	42	2004	10	20	2004-10-20	43	0	0.295139	6378	0	7		1	1	1	36.1	0				Jogo	4	0	0	0	0	1	0	1
1814	66	42	2004	10	20	2004-10-20	43	0	0.350694	6215	0	8		1	1	1						Furvela	0	1	0	0	0	0	0	0
1823	67	43	2004	10	21	2004-10-21	43	0	0.336806	6406	0	2		1	1	1	36	0	3			Jogo	1	0	1	0	0	0	0	1
1822	67	43	2004	10	21	2004-10-21	43	0	0.364583	6408	0	2		1	1	2	36.9	0				Furvela	0	1	0	0	0	0	0	0
1831	67	43	2004	10	22	2004-10-22	43	0	0.461111	6410	0	6		1	1	2			2			Vala	0	1	0	0	0	0	0	0
1832	67	43	2004	10	22	2004-10-22	43	0	0.489583	6411	0	6		1	1	1						Furvela	0	1	0	0	0	0	0	0
1835	67	43	2004	10	25	2004-10-25	44	0	0.401389	6413	0	3		1	1	2	36	0	2			Furvela	4	0	0	0	0	1	0	1			0	0
1834	67	43	2004	10	25	2004-10-25	44	0	0.330556	6412	1			1	1	1	39.8	1	3			Ucucho	0	1	0	0	0	0	0	0
1840	67	44	2004	10	28	2004-10-28	44	0	0.460417	6388	0	6		1	1	1						Furvela	0	1	0	0	0	0	0	0
1845	67	44	2004	10	30	2004-10-30	44			6415	0	6		1	1	1							0	1	0	0	0	0	0	0
5770	233		2008	10	27	2008-10-27	44				11m			1		1	395		1			mchavale	3										0	0
5773	233		2008	10	27	2008-10-27	44				3m			1		1						jogo	0
5775	233		2008	10	27	2008-10-27	44				5m			1		1	360				n	Furvela	3
5780	233		2008	10	27	2008-10-27	44				9m			1		1						jogo	0
5785	233		2008	10	27	2008-10-27	44				9m			1		1						Furvela	4
1847	68	44	2004	11	1	2004-11-01	45	0	0.34375	6415	0	6		1	1	2	39.5	1	1			Furvela	0	1	0	0	0	0	0	0
1860	68	44	2004	11	4	2004-11-04	45	0	0.420139	6422	0	5		1	1	1	36.7	0	2	control		Jogo	3	0	0	0	1	0	0	1
1861	68	45	2004	11	5	2004-11-05	45	0	0.34375	6423	0	2		1	1	1	37	0	3			Jogo	1	0	1	0	0	0	0	1
5248	216	45	2008	11	6	2008-11-06	45	08:38:00	08:38:00	8324	0	8		1	1	2	35.9	0	2			jogo	0	1	0	0	0	0	0	0
5255	216	45	2008	11	6	2008-11-06	45	10:49:00	10:49:00	8327	1			1	1	2	38.4	1				muengue	0	1	0	0	0	0	0	0
5257	216	45	2008	11	7	2008-11-07	45	08:47:00	08:47:00	8328	0	8		1	1	2						matumbela	0	1	0	0	0	0	0	0
1872	68	45	2004	11	10	2004-11-10	46	0	0.296528	6427	0	5		1	1	1			2			Furvela	0	1	0	0	0	0	0	0
1876	68	45	2004	11	10	2004-11-10	46	0	0.379861	6428	0	4		1	1	2	36.1	0				Furvela	0	1	0	0	0	0	0	0
1884	69	45	2004	11	11	2004-11-11	46	0	0.385417	4973	0	11		1	1	1	37.1	0	3			Furvela	4	0	0	0	0	1	0	1
1883	69	45	2004	11	11	2004-11-11	46	0	0.336806	6416	0	6		1	1	2	37.7	1				Furvela	0	1	0	0	0	0	0	0
1887	69	46	2004	11	12	2004-11-12	46	0	0.376389	6366	0	5		1	1	1			2			Furvela	0	1	0	0	0	0	0	0
5261	216	45	2008	11	10	2008-11-10	46	11:40:00	11:40:00	7996	1			1	1	1						Furvela	0	1	0	0	0	0	0	0
5212	215	46	2008	11	12	2008-11-12	46	09:02:00	09:02:00	8334	0	2		1	1	2						jogo	1	0	1	0	0	0	0	1								hospital
5235	215	46	2008	11	13	2008-11-13	46	10:57:00	10:57:00	8067	1			1	1	1	38.6	1				Furvela	4	0	0	0	0	1	0	1
1893	69	46	2004	11	15	2004-11-15	47	0	0.427083	6432	0	6		1	1	1	36.8	0	1			Jogo	0	1	0	0	0	0	0	0
1895	69	46	2004	11	15	2004-11-15	47	0	0.470139	6366	0	5		1	1	2	36.7	0	1			Furvela	0	1	0	0	0	0	0	0
1896	69	46	2004	11	15	2004-11-15	47	0	0.503472	6320	0	8		1	1	2	36.9	0	2			Furvela	0	1	0	0	0	0	0	0
1897	69	46	2004	11	16	2004-11-16	47	0	0.372917	1855	1			1	1	2	39	1	2			M´bene	0	1	0	0	0	0	0	0
1898	69	46	2004	11	16	2004-11-16	47	0	0.392361	6433	0	8		1	1	1	36.9	0	3			Jogo	0	1	0	0	0	0	0	0
1902	69	46	2004	11	17	2004-11-17	47	0	0.334028		0	4		1	1	1			3			Jogo	0	1	0	0	0	0	0	0
1905	70	46	2004	11	18	2004-11-18	47	0	0.339583	6434	1			1	1	1	37.1	0	2			kulos	1	0	1	0	0	0	0	1
1906	70	46	2004	11	18	2004-11-18	47	0	0.352083	6435	0	1		1	1	1						Furvela	3	0	0	0	1	0	0	1			0	0
1912	70	47	2004	11	19	2004-11-19	47	0	0.336806	6437	0	3		1	1	1	37.3	0	2			Matumbela	0	1	0	0	0	0	0	0
1914	70	47	2004	11	19	2004-11-19	47	0	0.385417	6439	0	3		1	1	1	37.2	0	2			Jogo	1	0	1	0	0	0	0	1
1916	70	47	2004	11	19	2004-11-19	47	10	10	5387	0	6		1	1	1	39.1	1	2			Furvela	0	1	0	0	0	0	0	0
1917	70	47	2004	11	19	2004-11-19	47	0	0.41875	6440	0	8		1	1	1	39.1	1	2			furvela	1	0	1	0	0	0	0	1
5270	217	46	2008	11	17	2008-11-17	47	11:11:00	11:11:00	8108	0	8		1	1	1			2			Furvela	0	1	0	0	0	0	0	0
5323	218	46	2008	11	17	2008-11-17	47	09:30:00	09:30:00	8340	0	7		1	1	2	38	1	2			jogo	2	0	0	1	0	0	0	1
5315	218	46	2008	11	17	2008-11-17	47	08:48:00	08:48:00	8338	0	9		1	1	2	38.5	1				muengue	4	0	0	0	0	1	0	1
5329	218	46	2008	11	17	2008-11-17	47	10:17:00	10:17:00	8342	0	10		1	1	2	37.7	1				Furvela	0	1	0	0	0	0	0	0
5292	217	47	2008	11	19	2008-11-19	47	09:49:00	09:49:00	8319	0	10		1	1	2	36.5	0				ucucho	0	1	0	0	0	0	0	0
5346	219	47	2008	11	20	2008-11-20	47	10:36:00	10:36:00	8067	1			1	1	1						Furvela	0	1	0	0	0	0	0	0
5351	219	47	2008	11	21	2008-11-21	47	08:31:00	08:31:00	8349	0	2		1	1	2	38.8	1				matumbela	1	0	1	0	0	0	0	1			0	1	0
5362	219	47	2008	11	21	2008-11-21	47	11:11:00	11:11:00	7976	0	11		1	1	1							3	0	0	0	1	0	0	1
5359	219	47	2008	11	21	2008-11-21	47	09:46:00	09:46:00	8202	1			1	1	1						Furvela	2	0	0	1	0	0	0	1
1920	70	47	2004	11	22	2004-11-22	48	0	0.377083	6442	0	4		1	1	2	38.4	1	2			furvela	0	1	0	0	0	0	0	0
1924	70	47	2004	11	23	2004-11-23	48	0	0.336806	5444	0	5		1	1	1	38.5	1				Furvela	0	1	0	0	0	0	0	0			3
1928	70	47	2004	11	24	2004-11-24	48	0	0.334028	6445	0	8		1	1	2	37.8	1	2			Jogo	1	0	1	0	0	0	0	1			0	0
1927	70	47	2004	11	24	2004-11-24	48	0	0.364583	6244	1			1	1	2	40.3	1	2			Chidanga	1	0	1	0	0	0	0	1
1931	70	47	2004	11	25	2004-11-25	48	0	0.385417	6384	1			1	1	1	37.9	1	2			Furvela	1	0	1	0	0	0	0	1								hospital
1934	71	48	2004	11	26	2004-11-26	48	0	0.420139	6446	0	1		1	1	1	36.8	0	2			Jogo	0	1	0	0	0	0	0	0
5182	214	47	2008	11	24	2008-11-24	48	09:32:00	09:32:00	8354	0	4		1	1	2			3			bovane	5	0	0	0	0	0	1	1
5193	214	47	2008	11	25	2008-11-25	48	09:26:00	09:26:00	8357	0	10		1	1	2	38.5	1	2			Furvela	3	0	0	0	1	0	0	1
5142	213	48	2008	11	26	2008-11-26	48	10:38:00	10:38:00	8342	0	10		1	1	2			2			Furvela	3	0	0	0	1	0	0	1								hospital
5200	214	48	2008	11	26	2008-11-26	48	09:16:00	09:16:00	8360	0	9		1	1	1	39.3	1				matumbela	4	0	0	0	0	1	0	1											r
5152	213	48	2008	11	27	2008-11-27	48	09:30:00	09:30:00	7617	0	7		1	1	1	36.7	0	2			jogo	5	0	0	0	0	0	1	1			0	0
5151	213	48	2008	11	27	2008-11-27	48	09:22:00	09:22:00	8367	0	7		1	1	1			3			balavala	0	1	0	0	0	0	0	0
5154	213	48	2008	11	27	2008-11-27	48			8108	0	8		1	1	2	37.8	1	3			Furvela	3	0	0	0	1	0	0	1			0	0
5162	213	48	2008	11	28	2008-11-28	48	09:08:00	09:08:00	8370	0	10		1	1	2						Furvela	0	1	0	0	0	0	0	0								hospital
5163	213	48	2008	11	28	2008-11-28	48	09:16:00	09:16:00	8371	0	6		1	1	1						matumbela	0	1	0	0	0	0	0	0
5166	213	48	2008	11	28	2008-11-28	48	09:49:00	09:49:00	8373	0	5		1	1	1	37.5	1				jogo	0	1	0	0	0	0	0	0
1938	71	48	2004	11	29	2004-11-29	49	0	0.334028	6448	1			1	1	2	38.2	1	1			furvela	5	0	0	0	0	0	1	1								hospital
1936	71	48	2004	11	29	2004-11-29	49	0	0.294444	6447	0	2		1	1	2	38.2	1	2			Furvela	0	1	0	0	0	0	0	0
4239	182	48	2008	12	1	2008-12-01	49	10:28:00	10:28:00	8375	0	3		1	1	1						jogo	0	1	0	0	0	0	0	0
4241	182	48	2008	12	2	2008-12-02	49	08:45:00	08:45:00	8376	0	2		1	1	1			2			jogo	0	1	0	0	0	0	0	0
4249	182	48	2008	12	2	2008-12-02	49	09:49:00	09:49:00	8258	0	10		1	1	2	40	1	2			Furvela	3	0	0	0	1	0	0	1
4246	182	48	2008	12	2	2008-12-02	49	09:22:00	09:22:00	8378	0	9		1	1	2	39.1	1				jogo	4	0	0	0	0	1	0	1
4255	182	49	2008	12	3	2008-12-03	49	08:33:00	08:33:00	8113	0	10		1	1	2	39.1	1	2			Furvela	3	0	0	0	1	0	0	1
4212	181	49	2008	12	8	2008-12-08	50	10:54:00	10:54:00	8383	0	4		1	1	1	36.4	0	2			Furvela	0	1	0	0	0	0	0	0
4197	181	49	2008	12	8	2008-12-08	50	09:36:00	09:36:00	8381	0	4		1	1	2	37.5	1				jogo	3	0	0	0	1	0	0	1
4171	180	50	2008	12	10	2008-12-10	50	10:11:00	10:11:00	8168	0	7		1	1	2	36.9	0	2			jogo	3	0	0	0	1	0	0	1			0	0
4176	180	50	2008	12	10	2008-12-10	50	10:40:00	10:40:00	8392	1			1	1	2	37.8	1				Furvela	3	0	0	0	1	0	0	1
4183	180	50	2008	12	11	2008-12-11	50	10:16:00	10:16:00	8260	0	4		1	1	1			2			jogo	0	1	0	0	0	0	0	0
4192	180	50	2008	12	12	2008-12-12	50	08:55:00	08:55:00	8399	0	8		1	1	2	37.7	1	2		TR	jogo	0	0	0	0	0	0	0	1			0	0
4194	180	50	2008	12	12	2008-12-12	50	09:09:00	09:09:00	8349	0	3		1	1	2					TR	jogo	0	1	0	0	0	0	0	0
4273	183	50	2008	12	12	2008-12-12	50	11:00:00	11:00:00	8036	0	11		1	1	1						jogo	3	0	0	0	1	0	0	1
4284	183	50	2008	12	15	2008-12-15	51	09:34:00	09:34:00	8404	0	3		1	1	2						matumbela	0	1	0	0	0	0	0	0
4294	183	50	2008	12	15	2008-12-15	51	11:01:00	11:01:00	8282	0	5		1	1	2	38	1				bovane	3	0	0	0	1	0	0	1
4129	179	51	2008	12	17	2008-12-17	51	09:52:00	09:52:00	8408	0	5		1	1	1			2			Furvela	1	0	1	0	0	0	0	1
4130	179	51	2008	12	17	2008-12-17	51			8409	0	7		1	1	2						Furvela	2	0	0	1	0	0	0	1
4142	179	51	2008	12	18	2008-12-18	51	08:57:00	08:57:00		0	9		1	1	2	36.9	0	2			maxixe	3	0	0	0	1	0	0	1
4153	179	51	2008	12	19	2008-12-19	51	08:16:00	08:16:00	8231	1			1	1	1						Furvela	1	0	1	0	0	0	0	1
4154	179	51	2008	12	19	2008-12-19	51	08:21:00	08:21:00	8091	1			1	1	1						jogo	2	0	0	1	0	0	0	1
4323	184	51	2008	12	23	2008-12-23	52	08:38:00	08:38:00	8418	0	6		1	1	1	36.7	0				Furvela	0	1	0	0	0	0	0	0
4333	185	1	2007	1	3	2007-01-03	1	08:44:00	08:44:00	6868	1	8		2	1	1	38.4	1				matumbela	3	0	0	0	1	0	0	1
4337	185	1	2007	1	3	2007-01-03	1	10:00:00	10:00:00	7063	1	2		2	1	2						Furvela	3	0	0	0	1	0	0	1
4352	185	1	2007	1	5	2007-01-05	1	10:58:00	10:58:00	7315	2			2	1	1	39.1	1	2			h RSA	1	0	1	0	0	0	0	1
296	11	2	2004	1	7	2004-01-07	2	0	0.401389	3132	1	7		2	1	2	38.5	1	2			Matumbela	3	0	0	0	1	0	0	1
305	11	2	2004	1	8	2004-01-08	2	0	0.334028	4850	1	7		2	1	1	38.8	1	2			Matumbela	1	0	1	0	0	0	0	1
30	2	2	2004	1	8	2004-01-08	2	0	0.417361	1983	2			2	1	2	39.7	1	2			Furvela	4	0	0	0	0	1	0	1
313	11	2	2004	1	8	2004-01-08	2	9	9	382	2			2	1	1	38.6	1	2			Furvela	3	0	0	0	1	0	0	1
31	2	2	2004	1	8	2004-01-08	2	0	0.431944	3669	1	4		2	1	1			5			jogo	5	0	0	0	0	0	1	1
4362	186	2	2007	1	8	2007-01-08	2	11:00:00	11:00:00	6700	1	11		2	1	1	38.6	1	2			Furvela	0	1	0	0	0	0	0	0
4372	186	2	2007	1	9	2007-01-09	2	10:54:00	10:54:00	7064	1	3		2	1	2			2			Furvela	0	1	0	0	0	0	0	0
4371	186	2	2007	1	9	2007-01-09	2	09:55:00	09:55:00	7045	2			2	1	1	36.5	0	2			jogo	0	1	0	0	0	0	0	0
4385	187	2	2007	1	11	2007-01-11	2	12:01:00	12:01:00	7328	1	7		2	1	2	39.3	1	2			Furvela	0	1	0	0	0	0	0	0
4380	187	2	2007	1	11	2007-01-11	2	09:38:00	09:38:00	7130	1	1		2	1	1						jogo	0	1	0	0	0	0	0	0
4388	187	2	2007	1	12	2007-01-12	2	09:06:00	09:06:00	7065	1	6		2	1	1						jogo	5	0	0	0	0	0	1	1
3461	155	2	2008	1	7	2008-01-07	2	0	0.370833	7722	1	7		2	1	2	39.8	1	2			Furvela	4	0	0	0	0	1	0	1								hospital
3491	157	2	2008	1	10	2008-01-10	2	0	0.336111	7264	1	4		2	1	2	34.6		2			matumbela	0	1	0	0	0	0	0	0
3498	157	2	2008	1	10	2008-01-10	2	11	11	7144	1	10		2	1	2	39.2	1	2			Furvela	0	1	0	0	0	0	0	0
3502	157	2	2008	1	11	2008-01-11	2	0	0.350694		1	4		2	1	1	38.4	1	2			jogo	5	0	0	0	0	0	1	1
264	10	2	2004	1	12	2004-01-12	3	0	0.378472		1	6		2	1	1	37	0	2			Furvela	1	0	1	0	0	0	0	1			0	0
266	10	2	2004	1	12	2004-01-12	3	10	10	4865	1	10		2	1	2	39.4	1	2		TR	Furvela	4	0	0	0	0	1	0	1
279	10	2	2004	1	12	2004-01-12	3	0	0.465972		1	2		2	1	1	36.6	0	2			Matumbela	3	0	0	0	1	0	0	1
193	8	2	2004	1	13	2004-01-13	3	0	0.350694	4872	1	9		2	1	2	35.5	0	2			matumbela	3	0	0	0	1	0	0	1
196	8	2	2004	1	13	2004-01-13	3	0	0.365278	3649	1	5		2	1	2	36.7	0	2			matumbela	3	0	0	0	1	0	0	1			1	0	0
203	8	2	2004	1	13	2004-01-13	3	0	0.413194	4874	1	2		2	1	1	35.9	0	2			Jogo	1	0	1	0	0	0	0	1
200	8	2	2004	1	13	2004-01-13	3	0	0.3875	4873	2			2	1	1	38.6	1	2			Matumbela	3	0	0	0	1	0	0	1
208	8	2	2004	1	13	2004-01-13	3	0	0.448611		2			2	1	1	36.7	0	2			Jogo	4	0	0	0	0	1	0	1
195	8	2	2004	1	13	2004-01-13	3	0	0.363889	2198	1	3		2	1		36.8	0				Matumbela	1	0	1	0	0	0	0	1
213	8	3	2004	1	14	2004-01-14	3	0	0.359722	4879	1	5		2	1	1	39.4	1	3		TR	jogo	5	0	0	0	0	0	1	1			0	3	0
171	7	3	2004	1	15	2004-01-15	3	0	0.369444	1760	1	10		2	1	2	36.6	0	4			Jogo	3	0	0	0	1	0	0	1
181	7	3	2004	1	15	2004-01-15	3	0	0.419444	3189	1	8		2	1	2						Jogo	3	0	0	0	1	0	0	1
230	9	3	2004	1	16	2004-01-16	3	0	0.441667	4899	1	1		2	1	1	39.5	1	2			Matumbela	0	1	0	0	0	0	0	0
231	9	3	2004	1	16	2004-01-16	3	0	0.456944	4109	1	6		2	1	1			2			Jogo	4	0	0	0	0	1	0	1			0	0
234	9	3	2004	1	16	2004-01-16	3	0	0.477778		1	11		2	1	1			2			Arrame	3	0	0	0	1	0	0	1
4405	188	3	2007	1	15	2007-01-15	3	10:30:00	10:30:00	6926	1	8		2	1	1	39.6	1	2			Furvela	1	0	1	0	0	0	0	1
4399	187	3	2007	1	15	2007-01-15	3	09:25:00	09:25:00	7332	1	1		2	1	2	39.8	1	3			jogo	1	0	1	0	0	0	0	1
4400	187	3	2007	1	15	2007-01-15	3	09:34:00	09:34:00	7315	2			2	1	1						h RSA	0	1	0	0	0	0	0	0
4410	188	3	2007	1	16	2007-01-16	3	08:40:00	08:40:00	7207	1	7		2	1	2	36.5	0	3			bovane	0	1	0	0	0	0	0	0
4418	188	3	2007	1	17	2007-01-17	3	09:17:00	09:17:00	6700	1	11		2	1	1	36.4	0	2			jogo	5	0	0	0	0	0	1	1
4421	188	3	2007	1	17	2007-01-17	3			7136	1	10		2	1	2						Furvela	4	0	0	0	0	1	0	1
3528	158	3	2008	1	14	2008-01-14	3	0	0.417361		1	8		2	1	1	39.3	1	2			Furvela	4	0	0	0	0	1	0	1
3532	158	3	2008	1	14	2008-01-14	3	0	0.420139	7417	1	4		2	1	1	37	0	2			jogo	3	0	0	0	1	0	0	1
3533	158	3	2008	1	14	2008-01-14	3	0	0.461111	7833	1	6		2	1	1			2			jogo	0	1	0	0	0	0	0	0			0	0
3529	158	3	2008	1	14	2008-01-14	3	0	0.418056	7411	1	9		2	1	2						Furvela	0	1	0	0	0	0	0	0
3548	159	3	2008	1	15	2008-01-15	3	0	0.477778	7741	1	5		2	1	2	38.2	1	2			jogo	5	0	0	0	0	0	1	1
3541	158	3	2008	1	15	2008-01-15	3	0	0.415278	7410	1	5		2	1	2			3			mbatane	0	1	0	0	0	0	0	0
3564	159	3	2008	1	16	2008-01-16	3	0	0.459028	7848	1	2		2	1	1	38.5	1	3			Furvela	5	0	0	0	0	0	1	1
3561	159	3	2008	1	16	2008-01-16	3	0	0.377778	7614	1	7		2	1	1						jogo	1	0	1	0	0	0	0	1			0	0
3582	160	3	2008	1	17	2008-01-17	3	0	0.461806	7856	1	1		2	1	2						Furvela	0	1	0	0	0	0	0	0
3590	160	3	2008	1	18	2008-01-18	3	0	0.434028	7861	1	2		2	1	2	36.9	0	2			Furvela	1	0	1	0	0	0	0	1
3589	160	3	2008	1	18	2008-01-18	3	0	0.429167	7860	2			2	1	1	37	0	3			Furvela	4	0	0	0	0	1	0	1			0	0
242	9	3	2004	1	19	2004-01-19	4	0	0.359722	4903	1	11		2	1	2	38	1	2			Singa	5	0	0	0	0	0	1	1
247	9	3	2004	1	19	2004-01-19	4	0	0.373611	4905	1	1		2	1	2			2			Wengue	1	0	1	0	0	0	0	1
138	6	3	2004	1	19	2004-01-19	4	0	0.41875		2			2	1	2	35.8	0	2			xixe	1	0	1	0	0	0	0	1			0	0
150	6	3	2004	1	20	2004-01-20	4	0	0.376389		1	3		2	1	1	35.9	0	2			Furvela	4	0	0	0	0	1	0	1
157	6	3	2004	1	20	2004-01-20	4	0	0.475694		1	3		2	1	2			2			Furvela	1	0	1	0	0	0	0	1			0	0
104	5	4	2004	1	22	2004-01-22	4	0	0.330556	4925	1	10		2	1	2	36.6	0	2			Furvela	3	0	0	0	1	0	0	1
106	5	4	2004	1	22	2004-01-22	4	0	0.371528	4801	1	6		2	1	2	37	0	2			Jogo	0	1	0	0	0	0	0	0
108	5	4	2004	1	22	2004-01-22	4	0	0.376389	4927	2			2	1	1	38	1	2			Wengue	1	0	1	0	0	0	0	1
107	5	4	2004	1	22	2004-01-22	4	0	0.3875	3747	1	7		2	1	1	38.6	1				jogo	0	1	0	0	0	0	0	0
722	26	4	2004	1	24	2004-01-24	4	0	0.399306	4988	1	7		2	1	1	35.6	0	2			Psaela	0	1	0	0	0	0	0	0						571	58
725	26	4	2004	1	24	2004-01-24	4	0	0.418056		1	5		2	1	2	36	0	2			Maivene	1	0	1	0	0	0	0	1
729	26	4	2004	1	24	2004-01-24	4	0	0.440278	6106	1	2		2	1	2	37.3	0	2			Wengue	3	0	0	0	1	0	0	1
4441	189	4	2007	1	22	2007-01-22	4	08:38:00	08:38:00	7346	1	4		2	1	2			2			jogo	0	1	0	0	0	0	0	0
4448	189	4	2007	1	22	2007-01-22	4	10:50:00	10:50:00	7348	1	3		2	1	2	37.2	0	2			jogo	3	0	0	0	1	0	0	1
4449	189	4	2007	1	22	2007-01-22	4	11:45:00	11:45:00	7064	1	3		2	1	1	39	1	2			Furvela	4	0	0	0	0	1	0	1
4466	190	4	2007	1	24	2007-01-24	4	08:41:00	08:41:00	6756	1	11		2	1	1						jogo	0	1	0	0	0	0	0	0
4469	190	4	2007	1	25	2007-01-25	4	08:39:00	08:39:00	6528	1	8		2	1	2	37.5	1	2			Furvela	3	0	0	0	1	0	0	1
3608	161	4	2008	1	21	2008-01-21	4	0	0.489583	7122	2			2	1	1	39.4	1	1			Furvela	1	0	1	0	0	0	0	1
3595	160	4	2008	1	21	2008-01-21	4	0	0.350694	7863	1	9		2	1	2			2			Furvela	3	0	0	0	1	0	0	1
3604	161	4	2008	1	21	2008-01-21	4	0	0.419444	7472	1	3		2	1	1	38.2	1	2			Furvela	5	0	0	0	0	0	1	1			3
3602	160	4	2008	1	21	2008-01-21	4	0	0.417361	7868	1	2		2	1	1	36	0				Furvela	3	0	0	0	1	0	0	1
3615	161	4	2008	1	22	2008-01-22	4	10	10	7302	1	4		2	1	1	37	0	3			Furvela	3	0	0	0	1	0	0	1
3629	162	4	2008	1	23	2008-01-23	4	0	0.394444	7411	1	9		2	1	1	37.1	0	3			hospede de Maputo	3	0	0	0	1	0	0	1
3632	162	4	2008	1	23	2008-01-23	4	0	0.420139	7878	1	6		2	1	1	36.6	0	3			Furvela	3	0	0	0	1	0	0	1
3633	162	4	2008	1	23	2008-01-23	4	0	0.434028	7741	1	5		2	1	2	36.8	0	3			jogo	3	0	0	0	1	0	0	1			3
3622	161	4	2008	1	23	2008-01-23	4	0	0.343056	7519	1	11		2	1	2			5			Furvela	0	1	0	0	0	0	0	0			0	0
3641	162	4	2008	1	24	2008-01-24	4	0	0.432639	7705	1	3		2	1	1	39.2	1	2			Furvela	4	0	0	0	0	1	0	1
3650	162	4	2008	1	24	2008-01-24	4	0	0.502778	7886	1	8		2	1	2	38.1	1	2			Furvela	4	0	0	0	0	1	0	1			0	0
3645	162	4	2008	1	24	2008-01-24	4	0	0.454167	7885	1	4		2	1	2	37	0	4			jogo	3	0	0	0	1	0	0	1
3640	162	4	2008	1	24	2008-01-24	4	0	0.417361	7881	2			2	1	1	38.2	1	5			hospede de massinga	4	0	0	0	0	1	0	1			0	0
3656	162	4	2008	1	25	2008-01-25	4	0	0.43125	7890	1	11		2	1	1	38.4	1	2			jogo	3	0	0	0	1	0	0	1
127	5	4	2004	1	26	2004-01-26	5	0	0.377083	7784	1	2		2	1	2	36.8	0	2			Chidanga	4	0	0	0	0	1	0	1
320	12	4	2004	1	26	2004-01-26	5	0	0.426389	3132	1	8		2	1	1	39.8	1	2			jogo	2	0	0	1	0	0	0	1
337	12	4	2004	1	27	2004-01-27	5	0	0.427083		1	4		2	1	2			2			Furvela	5	0	0	0	0	0	1	1
338	12	4	2004	1	27	2004-01-27	5	0	0.428472	4946	1	7		2	1	2	36.1	0	2			Furvela	3	0	0	0	1	0	0	1
344	12	4	2004	1	27	2004-01-27	5	0	0.459722	4948	1	2		2	1	2	36.5	0	2		TR	jogo	5	0	0	0	0	0	1	1
345	12	4	2004	1	27	2004-01-27	5	0	0.460417	1857	1	8		2	1	1	36	0	2			Matumbela	0	1	0	0	0	0	0	0
346	12	4	2004	1	27	2004-01-27	5	0	0.482639	2986	1	11		2	1	1	36.7	0	2			Jogo	1	0	1	0	0	0	0	1
335	12	4	2004	1	27	2004-01-27	5	0	0.394444	23203	2			2	1	1	37.7	1	2			Matumbela	0	1	0	0	0	0	0	0
328	12	4	2004	1	27	2004-01-27	5	0	0.352778		2			2	1	1	38.7	1	3			Furvela	4	0	0	0	0	1	0	1
14	1	5	2004	1	28	2004-01-28	5	0	0.404167		1	6		2	1	2			2				3	0	0	0	1	0	0	1
7	1	5	2004	1	28	2004-01-28	5	0	0.357639	4952	1	2		2	1	2	36.9	0	3			xidanga	4	0	0	0	0	1	0	1
11	1	5	2004	1	28	2004-01-28	5			1945	1	3		2	1	1						jogo	2	0	0	1	0	0	0	1
78	4	5	2004	1	29	2004-01-29	5	0	0.352778	4962	1	2		2	1	2	37.9	1	2			Jogo	3	0	0	0	1	0	0	1								Hospital
84	4	5	2004	1	29	2004-01-29	5	10	10	5110	2			2	1	1	36.6	0	2			Furvela	4	0	0	0	0	1	0	1								hospital
61	3	5	2004	1	30	2004-01-30	5	0	0.400694		1	1		2	1	2	37.5	1	2			jogo	4	0	0	0	0	1	0	1
67	3	5	2004	1	30	2004-01-30	5	0	0.427778		1	3		2	1	1	37.7	1	2			Furvela	4	0	0	0	0	1	0	1
74	3	5	2004	1	30	2004-01-30	5	0	0.46875	3767	1	4		2	1	2	36.2	0	2			Furvela	3	0	0	0	1	0	0	1
62	3	5	2004	1	30	2004-01-30	5	0	0.378472		1	11		2	1	1						Furvela	0	1	0	0	0	0	0	0
4492	191	5	2007	1	30	2007-01-30	5	09:44:00	09:44:00	6817	1	4		2	1	1	37.9	1	2			h funhalouro	3	0	0	0	1	0	0	1
3674	163	5	2008	1	28	2008-01-28	5	0	0.447222	7216	1	8		2	1	2	36.6	0	2			Furvela	1	0	1	0	0	0	0	1
3669	163	5	2008	1	28	2008-01-28	5	0	0.408333	7149	1	9		2	1	2						Furvela	0	1	0	0	0	0	0	0
3694	164	5	2008	1	29	2008-01-29	5	0	0.502083	7135	1	8		2	1	1	37	0	3			Furvela	2	0	0	1	0	0	0	1
3685	163	5	2008	1	29	2008-01-29	5	0	0.4125	7550	1	5		2	1	2						jogo	0	1	0	0	0	0	0	0			0	0
3687	163	5	2008	1	29	2008-01-29	5	0	0.465972	7122	2			2	1	1						Furvela	0	1	0	0	0	0	0	0
3707	164	5	2008	1	30	2008-01-30	5	0	0.461111	7691	1	1		2	1	2	39.1	1	1			Furvela	2	0	0	1	0	0	0	1			0	0
3706	164	5	2008	1	30	2008-01-30	5	0	0.475	7134	2			2	1	2	40	1	2			jogo	1	0	1	0	0	0	0	1
3714	164	5	2008	1	31	2008-01-31	5	0	0.378472	7910	1	5		2	1	2	39.1	1	2			Furvela	0	1	0	0	0	0	0	0
3720	164	5	2008	1	31	2008-01-31	5	0	0.445833	7890	1	11		2	1	1	38	1	2			Furvela	4	0	0	0	0	1	0	1
3721	164	5	2008	1	31	2008-01-31	5				2			2	1	1	39	1				Furvela	3	0	0	0	1	0	0	1
3756	166	5	2008	2	1	2008-02-01	5	0	0.336111	7915	2			2	1	1	36.4	0	2			nharrumbo	0	1	0	0	0	0	0	0
1245	44	5	2004	2	2	2004-02-02	6	0	0.392361	3505	1	3		2	1	1	37.3	0	2			Furvela	4	0	0	0	0	1	0	1
522	19	5	2004	2	2	2004-02-02	6	0	0.432639	49.88	1	7		2	1	2						Furvela	3	0	0	0	1	0	0	1
1234	44	5	2004	2	2	2004-02-02	6	0	0.356944	4980	1	5		2	1	1	36.7	0			TR	Jogo	4	0	0	0	0	1	0	1
530	19	5	2004	2	3	2004-02-03	6	0	0.370139	4991	1	4		2	1	2	35.3	0	2			Bovane	1	0	1	0	0	0	0	1								hospital
499	18	6	2004	2	4	2004-02-04	6	0	0.370833	7784	1	2		2	1	2			2			Jogo	4	0	0	0	0	1	0	1
503	18	6	2004	2	4	2004-02-04	6	0	0.376389		1	4		2	1	2	37.3	0	2			Wengue	3	0	0	0	1	0	0	1
467	17	6	2004	2	4	2004-02-04	6	0	0.468056	3585	1	4		2	1	1			3			Furvela	1	0	1	0	0	0	0	1
502	18	6	2004	2	4	2004-02-04	6	0	0.384722	6009	1	4		2	1	1			3			Matumbela	1	0	1	0	0	0	0	1
509	18	6	2004	2	4	2004-02-04	6	0	0.377778	4937	1	11		2	1	1	36.7	0	3			Wengue	3	0	0	0	1	0	0	1			0	0
515	18	6	2004	2	4	2004-02-04	6	0	0.41875		1	2		2	1	1						Jogo	0	1	0	0	0	0	0	0
482	17	6	2004	2	5	2004-02-05	6	0	0.379167		1	8		2	1	2			2			Furvela	1	0	1	0	0	0	0	1
485	17	6	2004	2	5	2004-02-05	6	0	0.404861		1	8		2	1	2	36.8	0	2			Matumbela	3	0	0	0	1	0	0	1
486	17	6	2004	2	5	2004-02-05	6	0	0.406944		1	2		2	1	1	38.4	1	2			Furvela	4	0	0	0	0	1	0	1
488	17	6	2004	2	5	2004-02-05	6	0	0.421528	4946	1	7		2	1	2	37	0	2			jogo	3	0	0	0	1	0	0	1			0	0
491	17	6	2004	2	5	2004-02-05	6	0	0.418056	3390	1	4		2	1	1	38	1	2			Jogo	1	0	1	0	0	0	0	1
477	17	6	2004	2	5	2004-02-05	6	0	0.357639	3059	2			2	1	2	38.4	1	2		s	Furvela	1	0	1	0	0	0	0	1
472	17	6	2004	2	5	2004-02-05	6	0	0.323611	3189	1	9		2	1	1						Furvela	3	0	0	0	1	0	0	1
452	16	6	2004	2	6	2004-02-06	6	0	0.427083		1	2		2	1	2			2			Matumbela	0	1	0	0	0	0	0	0
448	16	6	2004	2	6	2004-02-06	6	0	0.376389	4937	2			2	1	1			2			Jogo	0	1	0	0	0	0	0	0
450	16	6	2004	2	6	2004-02-06	6	0	0.408333	6025	2			2	1	1			2			Furvela	1	0	1	0	0	0	0	1
405	15	6	2004	2	9	2004-02-09	7	0	0.386111		1	3		2	1	2	38.6	1	2			Furvela	3	0	0	0	1	0	0	1
407	15	6	2004	2	9	2004-02-09	7	0	0.392361	4148	1	5		2	1	2	35.9	0	2			Jogo	4	0	0	0	0	1	0	1
424	15	6	2004	2	9	2004-02-09	7	0	0.461806		1	4		2	1	1			2			Jogo	5	0	0	0	0	0	1	1
456	16	6	2004	2	9	2004-02-09	7	0	0.336111	3190	1	2		2	1	2	35.6	0	2			Chidanga	4	0	0	0	0	1	0	1											r
458	16	6	2004	2	9	2004-02-09	7	0	0.344444	4328	1	6		2	1	1	38.6	1	2			Furvela	2	0	0	1	0	0	0	1
413	15	6	2004	2	9	2004-02-09	7	0	0.415278	1639	2			2	1	1			2			Furvela	0	1	0	0	0	0	0	0			0	1	1	389	531
423	15	6	2004	2	9	2004-02-09	7	11	11	5110	2			2	1	1			3			Furvela	4	0	0	0	0	1	0	1
391	14	6	2004	2	10	2004-02-10	7	0	0.447917		1	8		2	1	2	38.6	1	1			Furvela	0	1	0	0	0	0	0	0
378	14	6	2004	2	10	2004-02-10	7	0	0.335417	3260	1	5		2	1	1	37	0	3			Matumbela	0	1	0	0	0	0	0	0
383	14	6	2004	2	10	2004-02-10	7	0	0.384028		1	5		2	1	1	36.4	0	3				2	0	0	1	0	0	0	1			0	0
390	14	6	2004	2	10	2004-02-10	7	0	0.440972	4988	1	7		2	1	2	35.9	0	3			Wengue	0	1	0	0	0	0	0	0
349	13	7	2004	2	11	2004-02-11	7	0	0.398611	4621	1	11		2	1	2	36.6	0	2			Furvela	1	0	1	0	0	0	0	1
353	13	7	2004	2	11	2004-02-11	7	0	0.420833		1	9		2	1		38.6	1	2			C. Maputo	3	0	0	0	1	0	0	1
355	13	7	2004	2	11	2004-02-11	7	0	0.427778	3669	1	5		2	1	2			2			Jogo	3	0	0	0	1	0	0	1			0	0				hospital
396	14	7	2004	2	11	2004-02-11	7	0	0.329861		1	5		2	1	1	36.2	0	3			Furvela	5	0	0	0	0	0	1	1
370	13	7	2004	2	12	2004-02-12	7	0	0.3875	6053	1	4		2	1	2			2			Furvela	5	0	0	0	0	0	1	1
668	24	7	2004	2	12	2004-02-12	7	0	0.469444	3189	1	9		2	1	2	36.1	0	2			Furvela	5	0	0	0	0	0	1	1
367	13	7	2004	2	12	2004-02-12	7	0	0.366667		1	9		2	1	2						jogo	4	0	0	0	0	1	0	1
663	24	7	2004	2	12	2004-02-12	7	0	0.418056	3889	1	1		2	1	1						Furvela	4	0	0	0	0	1	0	1
673	24	7	2004	2	13	2004-02-13	7	0	0.344444	1964	1	8		2	1	1	39.6	1	3			Furvela	4	0	0	0	0	1	0	1
672	24	7	2004	2	13	2004-02-13	7	8	8	4006	1	9		2	1	2							0	1	0	0	0	0	0	0
3775	166	7	2008	2	13	2008-02-13	7	0	0.336111	7533	1	6		2	1	1	39.6	1	2			Furvela	4	0	0	0	0	1	0	1
3778	166	7	2008	2	13	2008-02-13	7	0	0.403472		2			2	1	2	37.4	0	3			Furvela	2	0	0	1	0	0	0	1								hospital
3777	166	7	2008	2	13	2008-02-13	7	0	0.376389	7534	1	4		2	1	2			8			muengue	0	1	0	0	0	0	0	0
3782	166	7	2008	2	14	2008-02-14	7	0	0.484722	7555	1	4		2	1	1	38.4	1	2			jogo	5	0	0	0	0	0	1	1
3848	169	7	2009	2	15	2009-02-15	7	0	0.377778	7308	1	7		2	1	2	39.2	1	2			Furvela	0	1	0	0	0	0	0	0											r
3847	169	7	2009	2	15	2009-02-15	7	0	0.383333	7040	2			2	1	2	37	0	2			jogo	3	0	0	0	1	0	0	1
643	23	7	2004	2	16	2004-02-16	8	0	0.465972	3579	1	8		2	1	2	39.3	1	2			Matumbela	5	0	0	0	0	0	1	1
690	24	7	2004	2	16	2004-02-16	8	8	8	3003	1	9		2	1	2	36.8	0	2			Matumbela	3	0	0	0	1	0	0	1			0	0
689	24	7	2004	2	16	2004-02-16	8	0	0.329167	6065	1	5		2	1	1						Furvela	1	0	1	0	0	0	0	1
608	22	7	2004	2	17	2004-02-17	8	0	0.463194	4148	1	5		2	1	1	40	1	1			Furvela	3	0	0	0	1	0	0	1
609	22	7	2004	2	17	2004-02-17	8	0	0.470139	3190	1	1		2	1		35.9	0	2			Jogo	0	1	0	0	0	0	0	0
658	23	7	2004	2	17	2004-02-17	8	0	0.397222	1897	1	1		2	1	2	38.8	1	2			Furvela	5	0	0	0	0	0	1	1
661	23	7	2004	2	17	2004-02-17	8	0	0.40625	4021	1	1		2	1	2	36.9	0	2			Furvela	0	1	0	0	0	0	0	0			0	0
603	22	7	2004	2	17	2004-02-17	8	0	0.417361	6077	1	1		2	1	1						jogo	0	1	0	0	0	0	0	0
611	22	7	2004	2	17	2004-02-17	8	0	0.4875	1760	1	1		2	1	1	36.2	0				Furvela	0	1	0	0	0	0	0	0
619	22	8	2004	2	18	2004-02-18	8	0	0.34375		1	6		2	1	1	36.1	0	2			Furvela	1	0	1	0	0	0	0	1
578	21	8	2004	2	18	2004-02-18	8	0	0.469444	5021	2			2	1	1	37.4	0	2			Furvela	1	0	1	0	0	0	0	1
629	22	8	2004	2	18	2004-02-18	8	0	0.418056		1	1		2	1	1	37.1	0	3			matumbela	4	0	0	0	0	1	0	1
581	21	8	2004	2	19	2004-02-19	8	0	0.330556	2975	1	8		2	1	1			2			Furvela	5	0	0	0	0	0	1	1
594	21	8	2004	2	19	2004-02-19	8	0	0.378472	6092	2			2	1	1	36.8	0	3		s	Jogo	1	0	1	0	0	0	0	1
589	21	8	2004	2	19	2004-02-19	8	0	0.39375	6090	1	7		2	1	1	36.6	0				Furvela	4	0	0	0	0	1	0	1
592	21	8	2004	2	19	2004-02-19	8	0	0.400694	4621	1	11		2	1	1						Jogo	0	1	0	0	0	0	0	0			0	0
598	21	8	2004	2	19	2004-02-19	8	0	0.459028	3990	1	2		2	1	1						Matumbela	0	1	0	0	0	0	0	0
564	20	8	2004	2	20	2004-02-20	8	0	0.378472		2			2	1	2	34.9		2			Jogo	1	0	1	0	0	0	0	1
561	20	8	2004	2	20	2004-02-20	8	0	0.3875	3035	2			2	1	2						Jogo	1	0	1	0	0	0	0	1
3867	169	8	2009	2	19	2009-02-19	8	0	0.491667	7323	1	8		2	1	2	38	1				jogo	4	0	0	0	0	1	0	1
3871	169	8	2009	2	20	2009-02-20	8	0	0.365972	7342	1	9		2	1	1	35.8	0	2			jogo	0	1	0	0	0	0	0	0
3873	169	8	2009	2	20	2009-02-20	8	0	0.376389	7657	1	3		2	1	1	36.6	0	2			Furvela	1	0	1	0	0	0	0	1
3874	169	8	2009	2	20	2009-02-20	8	0	0.377083	7939	1	1		2	1	1	38.5	1	3			Furvela	1	0	1	0	0	0	0	1
574	20	8	2004	2	23	2004-02-23	9	0	0.336111	6101	1	2		2	1	1	36	0	2			Inharumbo	0	1	0	0	0	0	0	0
701	25	8	2004	2	23	2004-02-23	9	0	0.377083	4109	1	2		2	1	2	36.7	0	2			Furvela	1	0	1	0	0	0	0	1
710	25	8	2004	2	23	2004-02-23	9	0	0.449306	4014	2			2	1	1	37	0	2			Jogo	0	1	0	0	0	0	0	0
703	25	8	2004	2	23	2004-02-23	9	0	0.376389	3003	1	9		2	1	2	38.8	1	3			Furvela	3	0	0	0	1	0	0	1								Hospital
734	26	9	2004	2	25	2004-02-25	9	0	0.29375	2975	1	8		2	1	1			2			Furvela	0	1	0	0	0	0	0	0
735	26	9	2004	2	25	2004-02-25	9	0	0.318056		1	11		2	1	1						Wengue	0	1	0	0	0	0	0	0
1190	42	9	2004	2	26	2004-02-26	9	0	0.336806	3910	1	9		2	1	1	37.1	0	2			Furvela	1	0	1	0	0	0	0	1
1200	42	9	2004	2	26	2004-02-26	9	0	0.378472	6116	1	9		2	1	1	38.4	1	3			Matumbela	0	1	0	0	0	0	0	0
1193	42	9	2004	2	26	2004-02-26	9	0	0.335417	3780	1	4		2	1	2	37.5	1				Wengue	3	0	0	0	1	0	0	1
1219	43	9	2004	2	27	2004-02-27	9	0	0.370833	2848	1	11		2	1	1						Matumbela	0	1	0	0	0	0	0	0
1032	36	10	2004	3	4	2004-03-04	10	0	0.421528	3669	1	8		2	1	1	37.3	0	2			Wengue	4	0	0	0	0	1	0	1
1019	36	10	2004	3	4	2004-03-04	10	0	0.322917		1	5		2	1	1	37.9	1	3			Wengue	4	0	0	0	0	1	0	1
1029	36	10	2004	3	4	2004-03-04	10	0	0.392361		1	5		2	1	1	37.1	0	4			Matumbela	3	0	0	0	1	0	0	1								Hospital
1023	36	10	2004	3	4	2004-03-04	10	0	0.34375	6143	1	4		2	1	2						Matacalane	0	1	0	0	0	0	0	0
994	35	10	2004	3	5	2004-03-05	10	0	0.453472	6149	1	6		2	1	1			2			Matumbela	3	0	0	0	1	0	0	1			0	0
996	35	10	2004	3	5	2004-03-05	10	0	0.459722		2			2	1	1	39	1	2			Matumbela	4	0	0	0	0	1	0	1
5522	225	9	2008	3	3	2008-03-03	10	09:22:00	09:22:00	7955	1	3		2	1	2						balavala	0	1	0	0	0	0	0	0
5528	225	9	2008	3	3	2008-03-03	10	10:34:00	10:34:00	7376	1	11		2	1	2	37.2	0				jogo	4	0	0	0	0	1	0	1
5535	225	9	2008	3	3	2008-03-03	10	11:25:00	11:25:00	7217	1	10		2	1	1	39.6	1				jogo	3	0	0	0	1	0	0	1
5548	226	10	2008	3	5	2008-03-05	10	10:28:00	10:28:00	7146	1	7		2	1	2			2			matumbela	3	0	0	0	1	0	0	1
5544	225	10	2008	3	5	2008-03-05	10	08:10:00	08:10:00	7731	1	9		2	1	1	38.9	1				Furvela	5	0	0	0	0	0	1	1
5562	226	10	2008	3	6	2008-03-06	10	11:04:00	11:04:00	7365	1	8		2	1	1	36.9	0	2			Furvela	2	0	0	1	0	0	0	1
5564	226	10	2008	3	7	2008-03-07	10	09:15:00	09:15:00		1	5		2	1	2	37.4	0				Furvela	3	0	0	0	1	0	0	1
955	34	10	2004	3	8	2004-03-08	11	10	10		1	8		2	1	2	38.7	1	1			Furvela	3	0	0	0	1	0	0	1
1002	35	10	2004	3	8	2004-03-08	11	0	0.331944	4180	1	5		2	1	2	36.4	0	2			Furvela	4	0	0	0	0	1	0	1			0	0
1003	35	10	2004	3	8	2004-03-08	11	8	8	3715	2			2	1	1	35.9	0	3			Jogo	3	0	0	0	1	0	0	1
952	34	10	2004	3	8	2004-03-08	11	0	0.390972		1	3		2	1	1						Wengue	0	1	0	0	0	0	0	0
976	34	10	2004	3	9	2004-03-09	11	0	0.461806	1968	2			2	1	1						Furvela	0	1	0	0	0	0	0	0
934	33	10	2004	3	10	2004-03-10	11	0	0.390278	3157	1	1		2	1	1	36.3	0	2			Furvela	0	1	0	0	0	0	0	0			0	0
938	33	10	2004	3	10	2004-03-10	11	0	0.378472		1	10		2	1	1			2			Furvela	3	0	0	0	1	0	0	1
940	33	10	2004	3	10	2004-03-10	11	0	0.419444	6159	1	7		2	1	2	37.4	0	2			Jogo	1	0	1	0	0	0	0	1
933	33	10	2004	3	10	2004-03-10	11	0	0.375694	3649	1	7		2	1	1						Furvela	3	0	0	0	1	0	0	1
905	32	11	2004	3	11	2004-03-11	11	11	11	4109	1	3		2	1	1	35.9	0	2			Furvela	1	0	1	0	0	0	0	1
950	33	11	2004	3	11	2004-03-11	11	0	0.336806		1	1		2	1	2	39.7	1	2			Chidanga	5	0	0	0	0	0	1	1
907	32	11	2004	3	11	2004-03-11	11	12	12	6143	1	4		2	1	1	39.1	1	3			Jogo	3	0	0	0	1	0	0	1
911	32	11	2004	3	12	2004-03-12	11	0	0.336806	6106	1	2		2	1	1	37.1	0	1			Furvela	5	0	0	0	0	0	1	1			0	0
916	32	11	2004	3	12	2004-03-12	11	0	0.4125	1906	2			2	1	2	35.7	0	2			Furvela	0	1	0	0	0	0	0	0
5572	226	10	2008	3	10	2008-03-10	11	08:50:00	08:50:00	7096	2			2	1	1	36.8	0	6			Furvela	4	0	0	0	0	1	0	1
873	31	11	2004	3	15	2004-03-15	12	0	0.393056	3500	1	8		2	1	1						Furvela	0	1	0	0	0	0	0	0
889	31	11	2004	3	16	2004-03-16	12	0	0.371528	4180	1	5		2	1	2						Jogo	1	0	1	0	0	0	0	1
897	31	11	2004	3	16	2004-03-16	12	0	0.427778	6179	1	3		2	1	2						Jogo	0	1	0	0	0	0	0	0
891	31	11	2004	3	16	2004-03-16	12	9	9	3715	2			2	1	1						Jogo	0	1	0	0	0	0	0	0
855	30	11	2004	3	17	2004-03-17	12	0	0.427778		2			2	1	1	39	1	2			Matumbela	0	1	0	0	0	0	0	0
857	30	11	2004	3	17	2004-03-17	12	0	0.41875	4937	2			2	1	1						Jogo	0	1	0	0	0	0	0	0
812	29	12	2004	3	18	2004-03-18	12	0	0.420139		1	4		2	1	2	37.7	1	2	control		Matumbela	3	0	0	0	1	0	0	1
810	29	12	2004	3	18	2004-03-18	12	0	0.440972	6185	2			2	1	2	37.7	1	3			Jogo	1	0	1	0	0	0	0	1
865	30	12	2004	3	18	2004-03-18	12	0	0.376389	3649	1	7		2	1	1						Furvela	5	0	0	0	0	0	1	1			0	0
868	30	12	2004	3	18	2004-03-18	12	0	0.405556	6157	1	1		2	1	1						Furvela	0	1	0	0	0	0	0	0			0	0
818	29	12	2004	3	19	2004-03-19	12	0	0.378472	4503	1	5		2	1	2	38.6	1	3			Jogo	5	0	0	0	0	0	1	1			0	0
5621	228	11	2008	3	17	2008-03-17	12	11:20:00	11:20:00	7969	1	1		2	1	1	40.4	1	2			jogo	0	1	0	0	0	0	0	0			0	0
5612	228	11	2008	3	17	2008-03-17	12	09:31:00	09:31:00	7411	1	11		2	1	2	37	0	3			bovane	4	0	0	0	0	1	0	1
5637	228	12	2008	3	19	2008-03-19	12	11:30:00	11:30:00		1	7		2	1	2	39.5	1	2			Furvela	0	1	0	0	0	0	0	0
5650	229	12	2008	3	21	2008-03-21	12	09:41:00	09:41:00	7997	2			2	1	1	36.6	0				jogo	3	0	0	0	1	0	0	1
834	29	12	2004	3	22	2004-03-22	13	0	0.411806	6193	1	1		2	1	1	35.6	0	2			Matumbela	1	0	1	0	0	0	0	1
781	28	12	2004	3	23	2004-03-23	13	0	0.370139		1	3		2	1	2	37.9	1	2			Furvela	3	0	0	0	1	0	0	1
784	28	12	2004	3	23	2004-03-23	13	0	0.420139	6196	2			2	1	2	36.8	0	2			Wengue	1	0	1	0	0	0	0	1
783	28	12	2004	3	23	2004-03-23	13	0	0.375694	3500	1	8		2	1	2						Furvela	0	1	0	0	0	0	0	0
744	27	13	2004	3	25	2004-03-25	13	0	0.376389	3132	1	1		2	1	2	39.1	1	2			Furvela	3	0	0	0	1	0	0	1
749	27	13	2004	3	25	2004-03-25	13	0	0.41875	6208	2			2	1	1			2			Vala	1	0	1	0	0	0	0	1
750	27	13	2004	3	25	2004-03-25	13	0	0.440972	6209	2			2	1	2	37.4	0	2			Vala	0	1	0	0	0	0	0	0
5665	229	13	2008	3	25	2008-03-25	13	12:00:00	12:00:00	7313	1	6		2	1	2	37.6	1	3			jogo	5	0	0	0	0	0	1	1
3402	153	14	2003	4	1	2003-04-01	14	0	0.420139	3802	1	1		2	1	1			1			Furvela	0	1	0	0	0	0	0	0
3400	152	14	2003	4	1	2003-04-01	14	0	0.345833	2930	1	3		2	1	2	38.7	1	2			jogo	0	1	0	0	0	0	0	0
3392	151	14	2003	4	2	2003-04-02	14	10	10	2003	1	1		2	1	1	40.4	1	3			jogo	5	0	0	0	0	0	1	1
3364	148	14	2003	4	3	2003-04-03	14	0	0.420139		1	4		2	1	1			2			Furvela	1	0	1	0	0	0	0	1
3367	148	14	2003	4	3	2003-04-03	14	0	0.46875		2			2	1	1	39	1	2			Furvela	1	0	1	0	0	0	0	1
3363	148	14	2003	4	3	2003-04-03	14	10	10	3137	1	6		2	1	1	36	0	3			jogo	1	0	1	0	0	0	0	1			0	3
3353	146	14	2003	4	4	2003-04-04	14	0	0.375694	3934	2			2	1	1			2			malaia	0	1	0	0	0	0	0	0			0	0
767	27	13	2004	3	30	2004-03-30	14	0	0.394444	1660	1	11		2	1	1	36.7	0	2			Jogo	4	0	0	0	0	1	0	1
1130	40	14	2004	4	2	2004-04-02	14	0	0.475694		2			2	1	1	37.4	0	2			Inharime	3	0	0	0	1	0	0	1											r
1127	40	14	2004	4	2	2004-04-02	14	0	0.336111	3333	1	9		2	1	1	35.8	0	3			Chidanga	0	1	0	0	0	0	0	0
5697	230	13	2008	3	31	2008-03-31	14	11:25:00	11:25:00	7648	1	5		2	1	1	37.1	0	2			jogo	3	0	0	0	1	0	0	1
5692	230	13	2008	3	31	2008-03-31	14	9?	9?	7264	1	6		2	1	2	37.2	0				Furvela	0	1	0	0	0	0	0	0
5488	224	14	2008	4	1	2008-04-01	14	10!!	10!!	7653	1	8		2	1	2	39	1				Furvela	4	0	0	0	0	1	0	1
5494	224	14	2008	4	2	2008-04-02	14	10:00:00	10:00:00	8021	1	8		2	1	1	36.9	0	2			Furvela	5	0	0	0	0	0	1	1
5490	224	14	2008	4	2	2008-04-02	14	08:25:00	08:25:00	7532	1	6		2	1	1	38.4	1				Furvela	5	0	0	0	0	0	1	1			0	0
3361	147	14	2003	4	7	2003-04-07	15	0	0.411806		1	9		2	1	2			2			Furvela	3	0	0	0	1	0	0	1			0	0				hospital
3312	141	15	2003	4	8	2003-04-08	15	11	11		1	4		2	1	2	36	0	1			mocoduene	0	1	0	0	0	0	0	0			0	1	0
3331	144	15	2003	4	8	2003-04-08	15	0	0.377778	3949	2			2	1	2			3			matumbela	0	1	0	0	0	0	0	0
3283	138	15	2003	4	9	2003-04-09	15	0	0.469444	3059	1	1		2	1	2			2			Furvela	1	0	1	0	0	0	0	1
3282	138	15	2003	4	9	2003-04-09	15	0	0.440972	3953	1	6		2	1	2			3			Furvela	3	0	0	0	1	0	0	1
3279	137	15	2003	4	10	2003-04-10	15	0	0.413889	3956	1	5		2	1	2	37.8	1				m`bene	0	1	0	0	0	0	0	0
3260	135	15	2003	4	11	2003-04-11	15	9	9	3971	1	5		2	1	2	37.6	1	3			jogo	3	0	0	0	1	0	0	1
1090	39	15	2004	4	8	2004-04-08	15	0	0.376389	6227	1	7		2	1	1	39.2	1	1		TR	Furvela	5	0	0	0	0	0	1	1
1088	39	15	2004	4	8	2004-04-08	15	0	0.334028	3132	1	11		2	1	1	39.6	1	2			Jogo	3	0	0	0	1	0	0	1
1097	39	15	2004	4	9	2004-04-09	15	0	0.427083	4109	1	4		2	1	1						Furvela	0	1	0	0	0	0	0	0			0	0
5451	223	15	2008	4	9	2008-04-09	15	10:17:00	10:17:00	7135	1	11		2	1	1	38.4	1				Furvela	5	0	0	0	0	0	1	1
3236	132	15	2003	4	14	2003-04-14	16	0	0.377083	3978	1	6		2	1	1	40.4	1	2			m`bene	5	0	0	0	0	0	1	1
3247	133	15	2003	4	14	2003-04-14	16	0	0.477778	3984	1	8		2	1	2			2			Furvela	4	0	0	0	0	1	0	1
3233	131	16	2003	4	15	2003-04-15	16	0	0.46875	3994	1	6		2	1	2	39.4	1	1			Furvela	3	0	0	0	1	0	0	1
3209	128	16	2003	4	16	2003-04-16	16	0	0.454861	2003	1	11		2	1	2	39.7	1	2			Furvela	4	0	0	0	0	1	0	1
3208	128	16	2003	4	16	2003-04-16	16	0	0.419444	1235	2			2	1	1			5			Furvela	3	0	0	0	1	0	0	1			0	0
3202	128	16	2003	4	16	2003-04-16	16	0	0.377083	3192	1	1		2	1	2						jogo	0	1	0	0	0	0	0	0
3340	145	16	2003	4	18	2003-04-18	16	0	0.420139	2268	1	8		2	1	2			2			Furvela	5	0	0	0	0	0	1	1
3193	126	16	2003	4	18	2003-04-18	16	0	0.427083	2722	1	1		2	1	2			3			jogo	3	0	0	0	1	0	0	1
3339	145	16	2003	4	18	2003-04-18	16	0	0.45		1	8		2	1	1			3			jogo	3	0	0	0	1	0	0	1
1112	39	15	2004	4	13	2004-04-13	16	0	0.334722	6231	1	2		2	1	2						Jogo	4	0	0	0	0	1	0	1
1111	39	15	2004	4	13	2004-04-13	16	0	0.344444	23203	2			2	1	1	36.2	0				Matumbela	3	0	0	0	1	0	0	1
1116	39	15	2004	4	14	2004-04-14	16	0	0.366667	6234	1	5		2	1	2	38.9	1				Furvela	3	0	0	0	1	0	0	1
1156	42	16	2004	4	16	2004-04-16	16	0	0.463889	4021	1	3		2	1	2	35.6	0	2			Jogo	3	0	0	0	1	0	0	1
1157	42	16	2004	4	16	2004-04-16	16	0	0.507639	6238	1	9		2	1	1			2			Furvela	1	0	1	0	0	0	0	1
5469	223	16	2008	4	15	2008-04-15	16	09:20:00	09:20:00	8032	1	6		2	1	2	37.2	0	1			Furvela	3	0	0	0	1	0	0	1
5471	223	16	2008	4	15	2008-04-15	16	10:45:00	10:45:00		1	9		2	1	1			4			jogo	3	0	0	0	1	0	0	1						490	532
5415	222	16	2008	4	16	2008-04-16	16	11:11:00	11:11:00	7511	1	8		2	1	1	38.2	1				matumbela	0	0	0	0	0	0	0	1
5475	223	16	2008	4	16	2008-04-16	16	08:44:00	08:44:00	7722	1	10		2	1	1						matumbela	0	1	0	0	0	0	0	0
3179	125	16	2003	4	21	2003-04-21	17	0	0.404861	3167	1	5		2	1	1			2			bovane	4	0	0	0	0	1	0	1			3	0	0			hospital
3172	124	17	2003	4	22	2003-04-22	17	0	0.377083	2901	1	7		2	1	2			2			jogo	3	0	0	0	1	0	0	1
3173	124	17	2003	4	22	2003-04-22	17	0	0.419444	4014	1	3		2	1	2			3				3	0	0	0	1	0	0	1
3175	124	17	2003	4	22	2003-04-22	17	0	0.459028	2718	1	7		2	1	2	39	1	3			Furvela	1	0	1	0	0	0	0	1						529	40
3178	124	17	2003	4	23	2003-04-23	17	0	0.336111	3705	1	1		2	1	2			2			matumbela	4	0	0	0	0	1	0	1
3153	121	17	2003	4	25	2003-04-25	17	9	9	4031	2			2	1	2			5			jogo	3	0	0	0	1	0	0	1
1170	42	16	2004	4	20	2004-04-20	17	0	0.434028	3500	1	9		2	1	1			2			M´bene	3	0	0	0	1	0	0	1
1166	42	16	2004	4	20	2004-04-20	17	8	8	4952	1	5		2	1	1	36.8	0	4			Chidanga	0	1	0	0	0	0	0	0
1175	42	16	2004	4	21	2004-04-21	17	0	0.426389	6231	1	2		2	1	2			4			Furvela	3	0	0	0	1	0	0	1
1061	38	17	2004	4	23	2004-04-23	17	0	0.417361	3260	1	7		2	1	1	36.4	0	2			Xixe	3	0	0	0	1	0	0	1
5391	221	17	2008	4	25	2008-04-25	17	08:30:00	08:30:00	8044	1	3		2	1	2	37.4	0	2			Furvela	0	1	0	0	0	0	0	0
5393	221	17	2008	4	25	2008-04-25	17	09:04:00	09:04:00	7722	1	10		2	1	2	36.2	0	2			Furvela	3	0	0	0	1	0	0	1
3113	116	18	2003	4	29	2003-04-29	18	0	0.373611	2214	1	6		2	1	2	40.2	1	2			Furvela	1	0	1	0	0	0	0	1
3121	117	18	2003	4	29	2003-04-29	18	0	0.447917	4041	1	2		2	1	2			2			Furvela	4	0	0	0	0	1	0	1						170	509
3114	116	18	2003	4	29	2003-04-29	18	9	9	3327	1	8		2	1	1						Furvela	0	1	0	0	0	0	0	0
3095	114	18	2003	4	30	2003-04-30	18	0	0.419444	2268	1	8		2	1	1			2			Furvela	4	0	0	0	0	1	0	1			0	0
3098	114	18	2003	4	30	2003-04-30	18	0	0.463889	4047	1	6		2	1	1			2			jogo	3	0	0	0	1	0	0	1
3101	114	18	2003	4	30	2003-04-30	18	0	0.499306	2199	1	7		2	1	2			2			vilanculos	3	0	0	0	1	0	0	1
3066	112	18	2003	5	2	2003-05-02	18	0	0.427083		1	5		2	1	2			2			jogo	4	0	0	0	0	1	0	1
1080	38	18	2004	4	29	2004-04-29	18	0	0.475694	4021	1	4		2	1	2	38.8	1	3			Matacalane	4	0	0	0	0	1	0	1
5405	221	17	2008	4	28	2008-04-28	18	10:28:00	10:28:00	7216	1	11		2	1	2	37.3	0	2			Furvela	4	0	0	0	0	1	0	1
5408	221	17	2008	4	28	2008-04-28	18	11:25:00	11:25:00	8052	1	3		2	1	2			5			Furvela	4	0	0	0	0	1	0	1
5369	220	18	2008	4	29	2008-04-29	18	10:50:00	10:50:00	7140	1	9		2	1	1	35.4	0	2			jogo	3	0	0	0	1	0	0	1
5368	220	18	2008	4	29	2008-04-29	18	10:38:00	10:38:00	8015	1	1		2	1	2	37.6	1	4			jogo	4	0	0	0	0	1	0	1
5367	220	18	2008	4	29	2008-04-29	18	10:18:00	10:18:00	8053	1	1		2	1	2	37.6	1				h malaia	3	0	0	0	1	0	0	1
5411	221	18	2008	4	29	2008-04-29	18	09:35:00	09:35:00	7856	1	3		2	1	1	36.7	0				Furvela	2	0	0	1	0	0	0	1
5412	221	18	2008	4	29	2008-04-29	18	09:45:00	09:45:00	7326	1	3		2	1	2	37.7	1				jogo	5	0	0	0	0	0	1	1
3729	165	18	2008	5	2	2008-05-02	18	0	0.469444	7431	1	9		2	1	1	38.4	1	3			nharrumbo	4	0	0	0	0	1	0	1
5109	212	18	2009	4	29	2009-04-29	18			8199	1	5		2	1	1	37.8	1	2			Furvela	2	0	0	1	0	0	0	1
5113	212	18	2009	4	29	2009-04-29	18	10:24:00	10:24:00		2			2	1	2	37.7	1	2			matumbela	0	0	0	0	0	0	0	1
5128	212	18	2009	4	30	2009-04-30	18	09:41:00	09:41:00	8646	1	8		2	1	2	38.9	1	3			jogo	3	0	0	0	1	0	0	1
3071	112	18	2003	5	5	2003-05-05	19	0	0.338889	4057	2			2	1	2			3			jogo	4	0	0	0	0	1	0	1
3040	111	19	2003	5	6	2003-05-06	19	0	0.427083	1006	1	11		2	1	2			2			Furvela	5	0	0	0	0	0	1	1
3050	111	19	2003	5	7	2003-05-07	19	0	0.417361	3153	1	1		2	1	2			2			jogo	3	0	0	0	1	0	0	1
3051	111	19	2003	5	7	2003-05-07	19	0	0.427083	3667	1	1		2	1	1			2			matumbela	3	0	0	0	1	0	0	1
3044	111	19	2003	5	7	2003-05-07	19	0	0.373611	4073	2			2	1	1			2			Furvela	3	0	0	0	1	0	0	1
3010	110	19	2003	5	8	2003-05-08	19	0	0.370833	4077	1	8		2	1	2	39.4	1	2			Furvela	4	0	0	0	0	1	0	1
3013	110	19	2003	5	8	2003-05-08	19	0	0.40625	3327	1	9		2	1	2			2			Furvela	3	0	0	0	1	0	0	1
3014	110	19	2003	5	8	2003-05-08	19	0	0.378472	2150	1	8		2	1	2	38.6	1	2			jogo	1	0	1	0	0	0	0	1								hospital
3008	110	19	2003	5	8	2003-05-08	19	0	0.336111		1	11		2	1	2						Furvela	3	0	0	0	1	0	0	1
3020	110	19	2003	5	9	2003-05-09	19	8	8	4081	1	4		2	1	1			2			Furvela	5	0	0	0	0	0	1	1			0	0
3021	110	19	2003	5	9	2003-05-09	19	0	0.335417	3532	1	1		2	1	2						jogo	0	1	0	0	0	0	0	0
1309	47	18	2004	5	5	2004-05-05	19	0	0.350694	4765	1	2		2	1	1						Jogo	0	1	0	0	0	0	0	0
1310	47	18	2004	5	5	2004-05-05	19	0	0.335417	4952	1	6		2	1	1						Matumbela	0	1	0	0	0	0	0	0
1317	47	19	2004	5	6	2004-05-06	19	0	0.358333	6255	1	2		2	1	1	39.5	1	3			Jogo	3	0	0	0	1	0	0	1
1323	47	19	2004	5	7	2004-05-07	19	0	0.447917	3059	2			2	1	2	35.7	0				Furvela	3	0	0	0	1	0	0	1
3739	165	18	2008	5	5	2008-05-05	19	0	0.404861	8061	1	5		2	1	1	37.8	1	2			jogo	3	0	0	0	1	0	0	1
3752	165	19	2008	5	6	2008-05-06	19	0	0.378472	8053	1	2		2	1	2	38	1	2			jogo	4	0	0	0	0	1	0	1
3749	165	19	2008	5	6	2008-05-06	19	9	9	7552	1	1		2	1	1	39.1	1	3			Furvela	1	0	1	0	0	0	0	1
3753	165	19	2008	5	6	2008-05-06	19	0	0.413194	8015	1	2		2	1	2						jogo	0	1	0	0	0	0	0	0
3787	167	19	2008	5	7	2008-05-07	19	0	0.356944	8057	1	6		2	1	2	38.8	1	3			Furvela	3	0	0	0	1	0	0	1
3796	167	19	2008	5	8	2008-05-08	19	0	0.419444	7146	1	1		2	1	2	39	1	2			Furvela	3	0	0	0	1	0	0	1
5138	212	18	2009	5	4	2009-05-04	19		10?	7716	1	1		2	1	2						Furvela	0	1	0	0	0	0	0	0
5090	211	18	2009	5	5	2009-05-05	19	11:45:00	11:45:00	8238	1	1		2	1	1	37.6	1	3			matumbela	2	0	0	1	0	0	0	1
5091	211	18	2009	5	5	2009-05-05	19	11:50:00	11:50:00	8142	1	6		2	1	1			3			jogo	2	0	0	1	0	0	0	1
5082	211	18	2009	5	5	2009-05-05	19	09:13:00	09:13:00	8649	1	1		2	1	2	40	1	4			jogo	4	0	0	0	0	1	0	1
5079	211	18	2009	5	5	2009-05-05	19	08:50:00	08:50:00	7982	1	7		2	1	2						ucucho	0	1	0	0	0	0	0	0
5092	211	19	2009	5	6	2009-05-06	19	08:48:00	08:48:00		1	8		2	1	1	38.5	1				jogo	3	0	0	0	1	0	0	1
5100	211	19	2009	5	6	2009-05-06	19	10:16:00	10:16:00	8509	1	8		2	1	1	37.9	1				maputo	3	0	0	0	1	0	0	1
5049	210	19	2009	5	8	2009-05-08	19			8136	1	3		2	1	1	36	0				jogo	1	0	1	0	0	0	0	1
5051	210	19	2009	5	8	2009-05-08	19			8660	1	7		2	1	1						jogo	0	1	0	0	0	0	0	0
2954	108	19	2003	5	12	2003-05-12	20	0	0.392361		1	5		2	1	1			2			muengue	3	0	0	0	1	0	0	1
2967	108	19	2003	5	12	2003-05-12	20	0	0.419444	3543	1	1		2	1	1			2			Furvela	3	0	0	0	1	0	0	1
2950	108	19	2003	5	12	2003-05-12	20	0	0.342361	4086	1	7		2	1	1	39.5	1	3			matumbela	0	1	0	0	0	0	0	0
2952	108	19	2003	5	12	2003-05-12	20	0	0.335417	4087	1	11		2	1	2						Furvela	1	0	1	0	0	0	0	1
2957	108	19	2003	5	12	2003-05-12	20	0	0.377778	3005	1	1		2	1	2						jogo	0	1	0	0	0	0	0	0			0	0
2959	108	19	2003	5	12	2003-05-12	20	0	0.378472	4009	1	2		2	1	2						Furvela	3	0	0	0	1	0	0	1
2969	108	20	2003	5	13	2003-05-13	20	0	0.350694	1006	1	11		2	1	1			3			massinga	1	0	1	0	0	0	0	1
2983	109	20	2003	5	14	2003-05-14	20	0	0.399306	3642	1	1		2	1	1			2			Furvela	0	1	0	0	0	0	0	0
1325	48	19	2004	5	10	2004-05-10	20	0	0.460417	4579	1	1		2	1	1			2			Furvela	3	0	0	0	1	0	0	1			0	0
1330	48	19	2004	5	12	2004-05-12	20	0	0.461111	1950	1	3		2	1	1	37	0	2			Matumbela	0	1	0	0	0	0	0	0
1335	48	20	2004	5	14	2004-05-14	20	0	0.375694	3649	1	9		2	1	2	35.8	0	4			Jogo	3	0	0	0	1	0	0	1
1336	48	20	2004	5	14	2004-05-14	20	0	0.399306	3505	1	6		2	1	1						Jogo	0	1	0	0	0	0	0	0
1337	48	20	2004	5	14	2004-05-14	20	0	0.413194	4109	1	5		2	1	2						Wengue	0	1	0	0	0	0	0	0
3807	167	19	2008	5	12	2008-05-12	20	0	0.376389	7475	1	1		2	1	2	39.6	1	2			nharrumbo	5	0	0	0	0	0	1	1
3832	168	20	2008	5	13	2008-05-13	20	0	0.489583	7653	1	1		2	1	1	37.3	0	2			jogo	0	1	0	0	0	0	0	0
3833	168	20	2008	5	13	2008-05-13	20	0	0.507639	8070	1	1		2	1	2	38.1	1	2			Furvela	4	0	0	0	0	1	0	1
3827	168	20	2008	5	13	2008-05-13	20	0	0.438889		2			2	1	1	37.5	1	2			Furvela	3	0	0	0	1	0	0	1
3822	168	20	2008	5	13	2008-05-13	20	0	0.383333	8061	1	11		2	1	1						Furvela	0	1	0	0	0	0	0	0
3829	168	20	2008	5	13	2008-05-13	20	0	0.420139	7288	1	1		2	1	1	37.2	0				Furvela	5	0	0	0	0	0	1	1
3835	168	20	2008	5	14	2008-05-14	20	0	0.397222	7807	1	4		2	1	1	37.9	1	2			Furvela	4	0	0	0	0	1	0	1
3836	168	20	2008	5	14	2008-05-14	20	0	0.377778		1	1		2	1	2	36.4	0	3			Furvela	0	1	0	0	0	0	0	0
3837	168	20	2008	5	14	2008-05-14	20	0	0.4125	8072	1	2		2	1	1						jogo	0	1	0	0	0	0	0	0
3839	168	20	2008	5	14	2008-05-14	20	0	0.418056				2	2	1	1							0	1	0	0	0	0	0	0
5067	210	19	2009	5	11	2009-05-11	20	10:40:00	10:40:00		1	8		2	1	1			2			Furvela	5	0	0	0	0	0	1	1			0	0
5068	210	19	2009	5	11	2009-05-11	20	11:11:00	11:11:00	8231	1	5		2	1	2			2				0	1	0	0	0	0	0	0
5069	210	19	2009	5	11	2009-05-11	20	11:18:00	11:18:00		1	8		2	1	2			2			jogo	5	0	0	0	0	0	1	1
5065	210	19	2009	5	11	2009-05-11	20	10:07:00	10:07:00	8663	1	7		2	1	2						jogo	2	0	0	1	0	0	0	1
5018	209	20	2009	5	13	2009-05-13	20			8108	1	2		2	1	1	36.6	0	2			jogo	4	0	0	0	0	1	0	1
5019	209	20	2009	5	13	2009-05-13	20			8370	1	4		2	1	2	38.8	1	2			Furvela	2	0	0	1	0	0	0	1
5026	209	20	2009	5	13	2009-05-13	20	11:50:00	11:50:00	8117	1	8		2	1	2	37	0	3			Furvela	4	0	0	0	0	1	0	1
5017	209	20	2009	5	13	2009-05-13	20	08:46:00	08:46:00	8539	1	6		2	1	1						jogo	0	1	0	0	0	0	0	0
4980	208	20	2009	5	14	2009-05-14	20	11:31:00	11:31:00	8660	1	7		2	1	2	37.6	1	2			Furvela	0	1	0	0	0	0	0	0
4982	208	20	2009	5	14	2009-05-14	20	11:55:00	11:55:00	8677	1	5		2	1	1	36.6	0	2			jogo	0	1	0	0	0	0	0	0
5031	209	20	2009	5	14	2009-05-14	20	09:13:00	09:13:00	8182	1	1		2	1	2	39.1	1	2			balavala	5	0	0	0	0	0	1	1
5040	209	20	2009	5	14	2009-05-14	20	10:21:00	10:21:00	8675	1	6		2	1	1	39	1	3			jogo	5	0	0	0	0	0	1	1
4984	208	20	2009	5	15	2009-05-15	20	10:01:00	10:01:00	8679	1	4		2	1	2			3			Furvela	0	0	0	0	0	0	0	1
3004	109	20	2003	5	19	2003-05-19	21	0	0.376389	3875	1	3		2	1	1			2			jogo	1	0	1	0	0	0	0	1			0	0
2931	107	21	2003	5	20	2003-05-20	21	0	0.331944	4110	1	4		2	1	2			2			jogo	3	0	0	0	1	0	0	1			0	0
2939	107	21	2003	5	20	2003-05-20	21	0	0.377083	3005	1	1		2	1	1			2			balavala	0	1	0	0	0	0	0	0
2946	107	21	2003	5	20	2003-05-20	21	0	0.510417		1	1		2	1	1	38.8	1	2			jogo	4	0	0	0	0	1	0	1
2905	106	21	2003	5	21	2003-05-21	21	0	0.420139	2364	1	6		2	1	2			2			jogo	0	0	0	0	0	0	0	0
2895	106	21	2003	5	21	2003-05-21	21	0	0.34375	23109	1	6		2	1	2						jogo	4	0	0	0	0	1	0	1
2897	106	21	2003	5	21	2003-05-21	21	0	0.335417	4114	2			2	1	1	36.7	0				mahangue	1	0	1	0	0	0	0	1
2909	106	21	2003	5	22	2003-05-22	21	0	0.376389		1	9		2	1	1						jogo	3	0	0	0	1	0	0	1
2869	105	21	2003	5	23	2003-05-23	21	0	0.461806		1	1		2	1	2	36.8	0	1			Furvela	3	0	0	0	1	0	0	1
2922	106	21	2003	5	23	2003-05-23	21	0	0.40625		2			2	1	1						jogo	1	0	1	0	0	0	0	1
1344	48	20	2004	5	17	2004-05-17	21	0	0.418056	2975	1	11		2	1	2	38.3	1	2			Jogo	1	0	1	0	0	0	0	1			0	0
1354	48	20	2004	5	19	2004-05-19	21	0	0.352778	4740	1	1		2	1	1	38	1	4			Furvela	4	0	0	0	0	1	0	1
1269	46	21	2004	5	20	2004-05-20	21	0	0.334028	6255	1	2		2	1	2						Furvela	1	0	1	0	0	0	0	1
1273	46	21	2004	5	21	2004-05-21	21	0	0.392361	3505	1	6		2	1	2	38.5	1	2			Jogo	3	0	0	0	1	0	0	1
5003	208	20	2009	5	18	2009-05-18	21	10:21:00	10:21:00	8518	1	8		2	1	2	40.5	1	2			Furvela	5	0	0	0	0	0	1	1			0	0
5002	208	20	2009	5	18	2009-05-18	21	10:09:00	10:09:00		1	9		2	1	2						Furvela	0	1	0	0	0	0	0	0
4953	207	20	2009	5	19	2009-05-19	21	10:27:00	10:27:00	8091	1	5		2	1	2			2			Furvela	1	0	1	0	0	0	0	1
4975	207	21	2009	5	21	2009-05-21	21	9?	9?	8645	1	1		2	1	2						jogo	0	1	0	0	0	0	0	0			0	0
4978	207	21	2009	5	21	2009-05-21	21			8675	1	6		2	1	1						jogo	0	1	0	0	0	0	0	0
4927	206	21	2009	5	22	2009-05-22	21	11:30:00	11:30:00	8342	1	4		2	1	1	36.6	0				jogo	1	0	1	0	0	0	0	1
4929	206	21	2009	5	22	2009-05-22	21	11:50:00	11:50:00	8182	1	1		2	1	2	35.6	0				matumbela	1	0	1	0	0	0	0	1
2840	104	22	2003	5	28	2003-05-28	22	0	0.399306		2			2	1	1			2			jogo	1	0	1	0	0	0	0	1
2843	104	22	2003	5	28	2003-05-28	22	0	0.46875		1	1		2	1	1	39.3	1	4			Beula	1	0	1	0	0	0	0	1
2848	104	22	2003	5	29	2003-05-29	22	0	0.370139	1006	1	11		2	1	1			2			Furvela	0	1	0	0	0	0	0	0
2851	104	22	2003	5	29	2003-05-29	22	0	0.385417	3192	1	2		2	1	2			2			matumbela	5	0	0	0	0	0	1	1			0	0
2858	104	22	2003	5	29	2003-05-29	22	0	0.420833	4147	1	6		2	1	2						maxarula	3	0	0	0	1	0	0	1			0	0
2832	103	22	2003	5	30	2003-05-30	22	10	10	3904	1	5		2	1	1			2			Furvela	3	0	0	0	1	0	0	1
1277	46	21	2004	5	24	2004-05-24	22	0	0.4	3549	1	9		2	1	1	36.7	0	3			jogo	3	0	0	0	1	0	0	1
1281	46	21	2004	5	24	2004-05-24	22	0	0.465972	3500	1	10		2	1	2	37.7	1	3			Furvela	4	0	0	0	0	1	0	1
1282	46	21	2004	5	24	2004-05-24	22	0	0.489583	3669	1	8		2	1	1	36.7	0				Furvela	1	0	1	0	0	0	0	1
1285	46	21	2004	5	25	2004-05-25	22	0	0.405556	4579	1	1		2	1	2						Matumbela	3	0	0	0	1	0	0	1
1289	46	21	2004	5	25	2004-05-25	22		11?	4021	1	4		2	1	1	37.7	1				Jogo	4	0	0	0	0	1	0	1
1254	45	22	2004	5	28	2004-05-28	22	10	10	4109	1	5		2	1	1	39.7	1	2			Jogo	3	0	0	0	1	0	0	1			0	1	0
4936	206	21	2009	5	25	2009-05-25	22	09:40:00	09:40:00	8699	2			2	1	1			3			h maputo	5	0	0	0	0	0	1	1			1	0	0
4886	205	21	2009	5	26	2009-05-26	22	09:23:00	09:23:00	8703	1	5		2	1	2	37.3	0	2			Furvela	3	0	0	0	1	0	0	1
4895	205	21	2009	5	26	2009-05-26	22	10:40:00	10:40:00		1	9		2	1	2			2			Furvela	4	0	0	0	0	1	0	1
4898	205	21	2009	5	26	2009-05-26	22	11:16:00	11:16:00		1	8		2	1	1	36.6	0	2		TR	Furvela	5	0	0	0	0	0	1	1
4905	205	22	2009	5	27	2009-05-27	22	09:18:00	09:18:00	8156	1	5		2	1	2			2		TR pf(+)	jogo	4	0	0	0	0	1	0	1			0	0
2792	102	22	2003	6	2	2003-06-02	23	0	0.454861		1	1		2	1	2			2			nharrumbo	3	0	0	0	1	0	0	1
2800	102	23	2003	6	3	2003-06-03	23	0	0.334722	3453	1	1		2	1	1						Furvela	3	0	0	0	1	0	0	1
2773	101	23	2003	6	5	2003-06-05	23	0	0.500694	4178	1	6		2	1	1	38.2	1	2			Furvela	3	0	0	0	1	0	0	1
2779	101	23	2003	6	6	2003-06-06	23	0	0.336806		1	11		2	1	2	36	0	2			jogo	3	0	0	0	1	0	0	1
1262	45	22	2004	5	31	2004-05-31	23	0	0.391667	4875	1	4		2	1	1	37.1	0	2			Furvela	5	0	0	0	0	0	1	1
1371	49	22	2004	6	2	2004-06-02	23	0	0.447917	4573	1	6		2	1	1	36	0	3			Furvela	3	0	0	0	1	0	0	1			0	0
1374	49	23	2004	6	3	2004-06-03	23	0	0.454861	3132	2			2	1	1			2			Matumbela	3	0	0	0	1	0	0	1
1377	49	23	2004	6	4	2004-06-04	23	0	0.336806		1	6		2	1	1	36.8	0	2			Furvela	1	0	1	0	0	0	0	1
2733	100	23	2003	6	9	2003-06-09	24	0	0.376389		1	4		2	1	2	37.3	0	2			Furvela	4	0	0	0	0	1	0	1			3	0	0
2741	100	23	2003	6	9	2003-06-09	24	0	0.475694	4192	1	5		2	1	2	39.2	1	3			Furvela	4	0	0	0	0	1	0	1			0	0
2746	100	24	2003	6	10	2003-06-10	24	0	0.355556	4110	1	5		2	1	2	36.8	0	2			matumbela	4	0	0	0	0	1	0	1
2747	100	24	2003	6	10	2003-06-10	24	0	0.336111		1	8		2	1	2	38.6	1	2			Furvela	4	0	0	0	0	1	0	1
2753	100	24	2003	6	10	2003-06-10	24	0	0.378472		1	9		2	1	2	37.7	1	2			Furvela	4	0	0	0	0	1	0	1
2700	99	24	2003	6	10	2003-06-10	24	0	0.440972		1	2		2	1	1						Furvela	4	0	0	0	0	1	0	1
2702	99	24	2003	6	10	2003-06-10	24	0	0.478472	448	2			2	1	1						Furvela	1	0	1	0	0	0	0	1			0	0
2706	99	24	2003	6	11	2003-06-11	24	0	0.348611	4203	1	1		2	1	1	38.2	1	2			matumbela	4	0	0	0	0	1	0	1
2705	99	24	2003	6	11	2003-06-11	24	0	0.34375	2198	1	8		2	1	2	37.5	1				xidanga	1	0	1	0	0	0	0	1			0	0
2710	99	24	2003	6	11	2003-06-11	24	0	0.371528	3802	1	4		2	1	2						jogo	1	0	1	0	0	0	0	1
2648	97	24	2003	6	13	2003-06-13	24	0	0.378472	4014	1	3		2	1	2			2			bovane	5	0	0	0	0	0	1	1
1382	49	23	2004	6	7	2004-06-07	24	11	11	3500	1	11		2	1		37.6	1	2			Furvela	3	0	0	0	1	0	0	1
1390	50	23	2004	6	8	2004-06-08	24	0	0.465972		1	5		2	1	1						Wengue	0	1	0	0	0	0	0	0
1393	50	23	2004	6	9	2004-06-09	24	0	0.377778	3888	1	5		2	1	1	39	1	2			Furvela	3	0	0	0	1	0	0	1			1
1396	50	24	2004	6	10	2004-06-10	24	0	0.417361		1	6		2	1	1			2			Inharrumbo	3	0	0	0	1	0	0	1
1403	50	24	2004	6	11	2004-06-11	24	0	0.34375	6276	1	7		2	1	2						Jogo	0	1	0	0	0	0	0	0			0	3
2670	98	24	2003	6	16	2003-06-16	25	0	0.459028	3453	1	2		2	1	1	37.9	1	2			Furvela	3	0	0	0	1	0	0	1
2661	97	24	2003	6	16	2003-06-16	25	0	0.399306	1708	1	7		2	1	2						Furvela	0	1	0	0	0	0	0	0
2664	98	24	2003	6	16	2003-06-16	25	10	10		1	9		2	1	2							0	1	0	0	0	0	0	0
2672	98	25	2003	6	17	2003-06-17	25	8	8	3070	1	3		2	1	2	36.1	0	2			jogo	4	0	0	0	0	1	0	1
2687	98	25	2003	6	18	2003-06-18	25	0	0.377083	23167	1	7		2	1	2			2			Furvela	4	0	0	0	0	1	0	1
2691	98	25	2003	6	18	2003-06-18	25	0	0.420139		1	4		2	1	2	36.2	0	2			matumbela	5	0	0	0	0	0	1	1
2614	96	25	2003	6	19	2003-06-19	25	0	0.454861	3543	1	2		2	1	2	37.9	1	2			matumbela	5	0	0	0	0	0	1	1
2620	96	25	2003	6	20	2003-06-20	25	0	0.40625	4205			2	2	1	1	38.9	1	2			Furvela	4	0	0	0	0	1	0	1
2621	96	25	2003	6	20	2003-06-20	25	0	0.454861	2930	1	6		2	1	2						jogo	0	1	0	0	0	0	0	0
1423	51	25	2004	6	18	2004-06-18	25	0	0.377778	7880	1	8		2	1	1	38.7	1	3			Furvela	4	0	0	0	0	1	0	1
2626	96	25	2003	6	23	2003-06-23	26	0	0.359722	1708	1	7		2	1	1	39.6	1	2			Furvela	0	1	0	0	0	0	0	0
2630	96	25	2003	6	23	2003-06-23	26	0	0.377778		1	9		2	1	1	37.3	0	3			jogo	0	1	0	0	0	0	0	0
1428	51	25	2004	6	21	2004-06-21	26	0	0.376389	6283	1	5		2	1	1			2			Furvela	4	0	0	0	0	1	0	1
1429	51	25	2004	6	21	2004-06-21	26	0	0.40625	6284	1	3		2	1	2	37.8	1				Furvela	3	0	0	0	1	0	0	1
1432	51	25	2004	6	22	2004-06-22	26			6286	1	11		2	1	1						Furvela	0	1	0	0	0	0	0	0											r
1438	51	25	2004	6	23	2004-06-23	26	9	9	6289	1	1		2	1	2						Chidanga	0	1	0	0	0	0	0	0
2595	95	26	2003	6	30	2003-06-30	27	0	0.408333	3005	1	11		2	1	2	36	0	2			jogo	1	0	1	0	0	0	0	1
2599	95	26	2003	6	30	2003-06-30	27	0	0.41875	3189	1	1		2	1	1	40	1	3			Furvela	4	0	0	0	0	1	0	1			0	0
2567	94	27	2003	7	1	2003-07-01	27	0	0.427083	3490	1	1		2	1	2	38.4	1	2			matumbela	4	0	0	0	0	1	0	1
2574	94	27	2003	7	2	2003-07-02	27	0	0.463889	2758	1	9		2	1	2			3			Furvela	3	0	0	0	1	0	0	1
2588	94	27	2003	7	3	2003-07-03	27	11	11		1	6		2	1	1	38.5	1	3			jogo	5	0	0	0	0	0	1	1
2334	86	27	2003	7	3	2003-07-03	27	0	0.413889		1	9		2	1	2						Furvela	0	1	0	0	0	0	0	0
2579	94	27	2003	7	3	2003-07-03	27	0	0.351389	3132	1	2		2	1	1	36	0				matumbela	0	1	0	0	0	0	0	0			0	0
2526	93	27	2003	7	4	2003-07-04	27	0	0.350694	3910	1	1		2	1	2	39.5	1	2			matumbela	5	0	0	0	0	0	1	1
1442	51	26	2004	6	28	2004-06-28	27	0	0.336806	2198	2			2	1	1	38.6	1	2			Furvela	0	1	0	0	0	0	0	0
1448	52	26	2004	6	29	2004-06-29	27	0	0.401389	6276	1	7		2	1	2	36	0	2			M´bene	4	0	0	0	0	1	0	1
1453	52	26	2004	6	30	2004-06-30	27	0	0.336111	6204	1	3		2	1	2			2			Matumbela	0	1	0	0	0	0	0	0			0	0
1454	52	26	2004	6	30	2004-06-30	27	0	0.336806	6295	1	8		2	1	1	37.1	0	2			Furvela	1	0	1	0	0	0	0	1			0	0
1459	52	26	2004	6	30	2004-06-30	27	0	0.420139		1	6		2	1	1			2			Inharrumbo	0	1	0	0	0	0	0	0
1467	53	27	2004	7	2	2004-07-02	27	0	0.378472	4516	1	1		2	1	1			2			Chidanga	1	0	1	0	0	0	0	1			0	0
4001	174	27	2008	7	3	2008-07-03	27	08:47:00	08:47:00	8158	2			2	1	1	35.6	0	3			jogo	3	0	0	0	1	0	0	1
4007	174	27	2008	7	4	2008-07-04	27	08:34:00	08:34:00	8162	1	3		2	1	1	40	1	2			Furvela	3	0	0	0	1	0	0	1
4008	174	27	2008	7	4	2008-07-04	27	08:39:00	08:39:00	7639	1	4		2	1	2	36.9	0				jogo	3	0	0	0	1	0	0	1			0	0
4833	203	26	2009	6	29	2009-06-29	27	09:36:00	09:36:00	8761	1	6		2	1	2			1			jogo	3	0	0	0	1	0	0	1
4824	203	26	2009	6	29	2009-06-29	27	08:35:00	08:35:00	8703	1	6		2	1	1						Furvela	4	0	0	0	0	1	0	1
4834	203	26	2009	6	29	2009-06-29	27	09:48:00	09:48:00	8762	1	4		2	1	1	37	0				jogo	2	0	0	1	0	0	0	1
4840	203	26	2009	6	29	2009-06-29	27	11:30:00	11:30:00	8764	1	5		2	1	2						Furvela	0	1	0	0	0	0	0	0			0	1
4846	203	26	2009	6	30	2009-06-30	27	11:00:00	11:00:00	8356	1	11		2	1	1						Furvela	4	0	0	0	0	1	0	1			0	0
4796	202	27	2009	7	1	2009-07-01	27	09:25:00	09:25:00	8509	1	10		2	1	1	38.8	1	2			jogo	5	0	0	0	0	0	1	1
4798	202	27	2009	7	1	2009-07-01	27	10:00:00	10:00:00	8615	1	2		2	1	2	37.2	0	3			Furvela	3	0	0	0	1	0	0	1
4800	202	27	2009	7	1	2009-07-01	27	10:10:00	10:10:00		1	9		2	1	1			3			Furvela	4	0	0	0	0	1	0	1
4797	202	27	2009	7	1	2009-07-01	27	09:40:00	09:40:00	8642	1	1		2	1	1						Furvela	2	0	0	1	0	0	0	1
4808	202	27	2009	7	2	2009-07-02	27	10:11:00	10:11:00	7982	1	9		2	1	2							0	1	0	0	0	0	0	0
4815	202	27	2009	7	3	2009-07-03	27	08:50:00	08:50:00	8769	1	9		2	1	2	36.9	0	2			Furvela	4	0	0	0	0	1	0	1
2498	92	28	2003	7	9	2003-07-09	28	0	0.440972		1	9		2	1	1			2			bovane	4	0	0	0	0	1	0	1
2501	92	28	2003	7	9	2003-07-09	28	0	0.459028	4280	1	8		2	1	2	39.1	1	2			Furvela	4	0	0	0	0	1	0	1
2506	92	28	2003	7	9	2003-07-09	28	0	0.760417		1	9		2	1	1	36.8	0				Furvela	4	0	0	0	0	1	0	1
2512	92	28	2003	7	10	2003-07-10	28	0	0.378472	4205	1	5		2	1	1	38	1	2			barane	4	0	0	0	0	1	0	1
2516	92	28	2003	7	11	2003-07-11	28	0	0.334722	2930	1	7		2	1	1			2			muengue	4	0	0	0	0	1	0	1
2522	92	28	2003	7	11	2003-07-11	28	0	0.411111	3153	1	4		2	1	2	37.4	0	2			Furvela	4	0	0	0	0	1	0	1			0	0
2523	92	28	2003	7	11	2003-07-11	28	10	10	3667	1	4		2	1	1	37.8	1	2			matumbela	4	0	0	0	0	1	0	1
1473	53	27	2004	7	5	2004-07-05	28	0	0.336806	1722	1	1		2	1	1	35.6	0	2			Furvela	4	0	0	0	0	1	0	1
1477	53	27	2004	7	5	2004-07-05	28	0	0.418056	6275	2			2	1	2	39.1	1	2			Furvela	1	0	1	0	0	0	0	1			0	0
1474	53	27	2004	7	5	2004-07-05	28	9	9	6300	2			2	1	2			4			Inharrumbo	0	1	0	0	0	0	0	0
1475	53	27	2004	7	5	2004-07-05	28	0	0.38125	6301	2			2	1	1			4			Inharrumbo	0	1	0	0	0	0	0	0
1488	54	28	2004	7	9	2004-07-09	28	0	0.420139	3669	1	1		2	1	2	36.8	0	3			M`bene	3	0	0	0	1	0	0	1
4020	175	27	2008	7	7	2008-07-07	28	11:00:00	11:00:00	8079	1	3		2	1	1	36.7	0	3			nharrumbo	3	0	0	0	1	0	0	1
4015	174	27	2008	7	7	2008-07-07	28			7791	1	5		2	1	1	36.6	0				Furvela	2	0	0	1	0	0	0	1
4021	175	27	2008	7	7	2008-07-07	28	11:06:00	11:06:00	7550	1	11		2	1	1						Furvela	0	1	0	0	0	0	0	0
4029	175	28	2008	7	8	2008-07-08	28	09:50:00	09:50:00	8165	1	2		2	1	1	37.6	1	2			Furvela	4	0	0	0	0	1	0	1
4044	175	28	2008	7	9	2008-07-09	28	10:52:00	10:52:00	7555	1	11		2	1	2	37	0	3			Furvela	3	0	0	0	1	0	0	1
4051	176	28	2008	7	11	2008-07-11	28	08:48:00	08:48:00	7678	1	5		2	1	2			3			Furvela	0	1	0	0	0	0	0	0			0	0
4764	201	27	2009	7	6	2009-07-06	28				1	9		2	1	1	36.1	0	2			Furvela	0	1	0	0	0	0	0	0			0	0
4762	201	27	2009	7	6	2009-07-06	28	10:20:00	10:20:00	8771	1	9		2	1	1	37.9	1				Furvela	3	0	0	0	1	0	0	1			0	0
4774	201	27	2009	7	7	2009-07-07	28	10:07:00	10:07:00		1	1		2	1	2	40	1	2			bovane	3	0	0	0	1	0	0	1			0	0
4768	201	27	2009	7	7	2009-07-07	28	08:40:00	08:40:00	8324	1	4		2	1	1					TR	Furvela	0	1	0	0	0	0	0	0			0	0
4781	201	28	2009	7	8	2009-07-08	28	10:00:00	10:00:00		1	11		2	1	2	37	0	14			Furvela	0	1	0	0	0	0	0	0				3
4737	200	28	2009	7	10	2009-07-10	28			8108	1	4		2	1	1						balavala	0	1	0	0	0	0	0	0			0	0
2471	91	28	2003	7	14	2003-07-14	29	0	0.377778	4292	2			2	1	1			3			matumbela	3	0	0	0	1	0	0	1
2468	91	28	2003	7	14	2003-07-14	29	0	0.336111		1	7		2	1	1						jogo	0	1	0	0	0	0	0	0
2469	91	28	2003	7	14	2003-07-14	29	0	0.364583	3132	1	2		2	1	2	35.5	0				Furvela	3	0	0	0	1	0	0	1
2476	91	28	2003	7	14	2003-07-14	29	0	0.475694	3189	1	2		2	1	2						matumbela	4	0	0	0	0	1	0	1
2473	91	28	2003	7	14	2003-07-14	29	0	0.377083	3005	2			2	1	2						jogo	0	1	0	0	0	0	0	0
2483	91	29	2003	7	15	2003-07-15	29	0	0.417361	3904	1	7		2	1	1	37.8	1	3			matumbela	5	0	0	0	0	0	1	1
2487	91	29	2003	7	16	2003-07-16	29	0	954		1	3		2	1	2			1			Furvela	5	0	0	0	0	0	1	1
2439	90	29	2003	7	17	2003-07-17	29	0	0.413889	3550	1	3		2	1	2	37.1	0	2			mapinhane	3	0	0	0	1	0	0	1
2491	91	29	2003	7	17	2003-07-17	29	0	0.338194		1	5		2	1	2						Furvela	4	0	0	0	0	1	0	1			0	0
2451	90	29	2003	7	18	2003-07-18	29	0	0.377778	4244	1	5		2	1	1	39.4	1	2			Furvela	5	0	0	0	0	0	1	1
1494	54	28	2004	7	13	2004-07-13	29	0	0.376389	6307	1	3		2	1	2	36.1	0	3			Jogo	3	0	0	0	1	0	0	1
1497	54	28	2004	7	14	2004-07-14	29	11	11		2			2	1	1			4			Jogo	0	1	0	0	0	0	0	0
1503	54	29	2004	7	16	2004-07-16	29	9	9	4021	1	6		2	1	2	36.6	0	2			Chidanga	3	0	0	0	1	0	0	1
4060	176	28	2008	7	14	2008-07-14	29	11:11:00	11:11:00	8174	1	6		2	1	2	35.3	0	2			Vala	3	0	0	0	1	0	0	1
4063	176	29	2008	7	15	2008-07-15	29	09:33:00	09:33:00	8176	1	5		2	1	1	39.5	1	2			jogo	4	0	0	0	0	1	0	1
4062	176	29	2008	7	15	2008-07-15	29	08:34:00	08:34:00		1	3		2	1	1	36.7	0	3			matumbela	3	0	0	0	1	0	0	1
4069	176	29	2008	7	16	2008-07-16	29				2			2	1	1						Furvela	4	0	0	0	0	1	0	1						6	520
4747	200	28	2009	7	13	2009-07-13	29	12:28:00	12:28:00	7806	1	10		2	1	1	39.9	1	2			Furvela	3	0	0	0	1	0	0	1
4752	200	28	2009	7	14	2009-07-14	29	09:28:00	09:28:00	8066	1	10		2	1	2			2			Furvela	4	0	0	0	0	1	0	1
4760	200	28	2009	7	14	2009-07-14	29	11:14:00	11:14:00	8319	1	6		2	1	2	37.3	0				Furvela	5	0	0	0	0	0	1	1
4706	199	29	2009	7	15	2009-07-15	29	09:50:00	09:50:00		1	4		2	1	1	38	1	2		TR (+)	Furvela	5	0	0	0	0	0	1	1
4714	199	29	2009	7	16	2009-07-16	29	09:19:00	09:19:00		1	7		2	1	1	36.9	0				Furvela	5	0	0	0	0	0	1	1
2459	90	29	2003	7	21	2003-07-21	30	0	0.378472		1	1		2	1	1	37	0	2			jogo	4	0	0	0	0	1	0	1						303	500
2461	90	29	2003	7	21	2003-07-21	30	0	0.407639	1708	1	8		2	1	2	36	0	3			xidanga	3	0	0	0	1	0	0	1
2457	90	29	2003	7	21	2003-07-21	30	0	0.336111	4205	1	5		2	1	2						jogo	0	1	0	0	0	0	0	0			0	0
2408	89	30	2003	7	22	2003-07-22	30	0	0.376389	4309	1	4		2	1	2	38.9	1	1			Furvela	0	1	0	0	0	0	0	0
2404	89	30	2003	7	22	2003-07-22	30	0	0.336806	3860	1	11		2	1	2	38.4	1	3			jogo	3	0	0	0	1	0	0	1			0	0
2417	89	30	2003	7	23	2003-07-23	30	0	0.350694	4311	1	3		2	1	2	38.9	1	2			xidanga	1	0	1	0	0	0	0	1
2423	89	30	2003	7	23	2003-07-23	30	0	0.419444	4009	1	4		2	1	1			2			Furvela	4	0	0	0	0	1	0	1
2434	89	30	2003	7	24	2003-07-24	30	0	0.415278	3059	1	5		2	1	1	37.5	1	2			Furvela	4	0	0	0	0	1	0	1
2374	88	30	2003	7	24	2003-07-24	30	0	0.457639		2			2	1	2			2			Furvela	1	0	1	0	0	0	0	1
2379	88	30	2003	7	25	2003-07-25	30	0	0.365972	2223	2			2	1	2			3			jogo	3	0	0	0	1	0	0	1
1514	54	29	2004	7	19	2004-07-19	30	0	0.418056	3888	1	6		2	1	1			2			Furvela	4	0	0	0	0	1	0	1								hospital
1516	55	29	2004	7	20	2004-07-20	30	0	0.336111		1	1		2	1	1			2			Furvela	4	0	0	0	0	1	0	1								hospital
1519	55	29	2004	7	20	2004-07-20	30	0	0.441667	3333	2			2	1	1			2			Furvela	4	0	0	0	0	1	0	1
1527	55	30	2004	7	22	2004-07-22	30	11	11		1	3		2	1	1	39	1	2			C. Maputo	3	0	0	0	1	0	0	1
4085	177	29	2008	7	21	2008-07-21	30	11:00:00	11:00:00	7772	1	1		2	1	1	36.6	0				Furvela	0	1	0	0	0	0	0	0
4086	177	30	2008	7	22	2008-07-22	30	08:54:00	08:54:00	7956	1	3		2	1	1	37.6	1	2			h cumbana	4	0	0	0	0	1	0	1
4088	177	30	2008	7	23	2008-07-23	30			7532	1	9		2	1	2	39.7	1	2			jogo	4	0	0	0	0	1	0	1
4090	177	30	2008	7	23	2008-07-23	30	09:29:00	09:29:00	8189	1	8		2	1	1	35.6	0	3			Furvela	1	0	1	0	0	0	0	1			0	0
4098	177	30	2008	7	24	2008-07-24	30	09:21:00	09:21:00	7603	1	5		2	1	1	36.2	0	2			chiguelane	3	0	0	0	1	0	0	1
4100	177	30	2008	7	24	2008-07-24	30	10:00:00	10:00:00	7807	1	6		2	1	2	36	0	2			jogo	3	0	0	0	1	0	0	1
4672	198	29	2009	7	20	2009-07-20	30	11:07:00	11:07:00	8741	1	7		2	1	1						Furvela	0	1	0	0	0	0	0	0
4683	198	29	2009	7	21	2009-07-21	30	10:21:00	10:21:00	8430	1	3		2	1	2	36.4	0				jogo	0	1	0	0	0	0	0	0
4697	198	30	2009	7	22	2009-07-22	30	11:56:00	11:56:00	8273	1	2		2	1	1	38.6	1	2			Furvela	0	1	0	0	0	0	0	0
4689	198	30	2009	7	22	2009-07-22	30	09:00:00	09:00:00	7585	2			2	1	1			2			Furvela	3	0	0	0	1	0	0	1								hospital
4862	204	30	2009	7	23	2009-07-23	30	11:13:00	11:13:00	8602	1	2		2	1	2	36.8	0				matumbela	3	0	0	0	1	0	0	1
4868	204	30	2009	7	24	2009-07-24	30	09:04:00	09:04:00		1	11		2	1	2	37	0				jogo	0	1	0	0	0	0	0	0			1
4871	204	30	2009	7	24	2009-07-24	30	11:10:00	11:10:00	8731	1	2		2	1	1						matumbela	3	0	0	0	1	0	0	1											r
2388	88	30	2003	7	28	2003-07-28	31	9	9	4321	1	3		2	1	1			2			Furvela	3	0	0	0	1	0	0	1			0	0
2394	88	30	2003	7	28	2003-07-28	31	0	0.377083	4324	1	6		2	1	2	37.1	0				Furvela	0	1	0	0	0	0	0	0
2348	87	31	2003	7	29	2003-07-29	31	0	0.408333	4335	1	11		2	1	2			2			Furvela	4	0	0	0	0	1	0	1
2302	85	31	2003	8	1	2003-08-01	31	0	0.334028		1	11		2	1	2			5			Furvela	0	1	0	0	0	0	0	0
1532	55	30	2004	7	26	2004-07-26	31			4233	1	5		2	1	2			2			Jogo	4	0	0	0	0	1	0	1			1
1535	55	30	2004	7	26	2004-07-26	31	0	0.463889	6316	1	1		2	1	2	37.2	0	2				1	0	1	0	0	0	0	1
1547	56	30	2004	7	28	2004-07-28	31	0	0.417361	6323	2			2	1	2	39.2	1	1			C. Maputo	4	0	0	0	0	1	0	1			0	0
1548	56	31	2004	7	29	2004-07-29	31	0	0.373611	4021	1	4		2	1	2	36.9	0	2			Huwa	0	1	0	0	0	0	0	0			0	0
1554	56	31	2004	7	30	2004-07-30	31	0	0.461111		2			2	1	2			1			Furvela	3	0	0	0	1	0	0	1
1553	56	31	2004	7	30	2004-07-30	31	0	0.447917	3390	1	9		2	1	2			2			Furvela	1	0	1	0	0	0	0	1
1551	56	31	2004	7	30	2004-07-30	31				1	7		2	1	2						M´bene	0	1	0	0	0	0	0	0
4107	178	30	2008	7	28	2008-07-28	31	09:40:00	09:40:00	7215	2			2	1	2	39	1	4			jogo	3	0	0	0	1	0	0	1
4110	178	31	2008	7	30	2008-07-30	31	09:09:00	09:09:00	7861	1	8		2	1	1			3			Furvela	2	0	0	1	0	0	0	1			0	0
4112	178	31	2008	7	30	2008-07-30	31	09:50:00	09:50:00		2			2	1	1	39.2	1				Furvela	0	1	0	0	0	0	0	0
4119	178/9	31	2008	8	1	2008-08-01	31			8195	2			2	1	1	36.7	0				jogo	4	0	0	0	0	1	0	1
4873	204	30	2009	7	27	2009-07-27	31	08:42:00	08:42:00	8565	1	1		2	1	1	38.4	1	2			jogo	4	0	0	0	0	1	0	1			0	0
4881	204	30	2009	7	27	2009-07-27	31	11:47:00	11:47:00		1	6		2	1	2	37.5	1	2			Furvela	5	0	0	0	0	0	1	1
4876	204	30	2009	7	27	2009-07-27	31	09:54:00	09:54:00	8046	1	6		2	1	2	38.9	1	3			jogo	0	0	0	0	0	0	0	1
4875	204	30	2009	7	27	2009-07-27	31	09:48:00	09:48:00	8789	1	6		2	1	1	36.4	0				jogo	1	0	1	0	0	0	0	1			0	0
4630	196	31	2009	7	29	2009-07-29	31	09:31:00	09:31:00	8679	1	6		2	1	2	37	0	3			Furvela	0	1	0	0	0	0	0	0
2308	85	31	2003	8	4	2003-08-04	32	0	0.399306	4351	1	8		2	1	1	39.3	1	2			Furvela	4	0	0	0	0	1	0	1			0	0
2309	85	31	2003	8	4	2003-08-04	32	0	0.413194	4352	2			2	1	2	35.6	0	3			Furvela	1	0	1	0	0	0	0	1
2314	85	31	2003	8	4	2003-08-04	32	0	0.454861	1708	1	9		2	1	2						Furvela	0	1	0	0	0	0	0	0
2332	85	32	2003	8	6	2003-08-06	32	0	0.396528	4324	1	7		2	1	2	36	0	3			Furvela	5	0	0	0	0	0	1	1
2285	84	32	2003	8	7	2003-08-07	32	0	0.364583	3490	1	3		2	1	2	38.6	1	2			Furvela	1	0	1	0	0	0	0	1
2287	84	32	2003	8	7	2003-08-07	32	0	0.411111		1	4		2	1	2	34.6		2			matumbela	0	1	0	0	0	0	0	0
1565	57	31	2004	8	4	2004-08-04	32	0	0.496528		2			2	1	2							0	1	0	0	0	0	0	0
1566	57	32	2004	8	5	2004-08-05	32	0	0.375694	4855	1	6		2	1	1	37.9	1				Furvela	3	0	0	0	1	0	0	1
1570	57	32	2004	8	5	2004-08-05	32	0	0.447222		2			2	1	2						Furvela	0	1	0	0	0	0	0	0
1572	57	32	2004	8	6	2004-08-06	32			6276	1	8		2	1	2			2			Jogo	3	0	0	0	1	0	0	1
1573	57	32	2004	8	6	2004-08-06	32			9722	1	2		2	1	2			2			Jogo	4	0	0	0	0	1	0	1			0	0
1574	57	32	2004	8	6	2004-08-06	32			4448	1	1		2	1	1	39.6	1	3			Beula	5	0	0	0	0	0	1	1								hospital		TR
1577	57	32	2004	8	6	2004-08-06	32	0	0.454861	3888	1	7		2	1	1			3			Nhabundo	4	0	0	0	0	1	0	1											r
1576	57	32	2004	8	6	2004-08-06	32	0	0.452778	3333	2			2	1	1						Furvela	0	1	0	0	0	0	0	0
4655	196	31	2009	8	3	2009-08-03	32			8046	1	7		2	1	1	37.1	0	2			jogo	4	0	0	0	0	1	0	1			0	0
4654	196	31	2009	8	3	2009-08-03	32	10:33:00	10:33:00	8124	1	7		2	1	2	39.7	1				jogo	3	0	0	0	1	0	0	1
4605	195	32	2009	8	5	2009-08-05	32	09:27:00	09:27:00		1	7		2	1	1	39.1	1	2			Furvela	0	1	0	0	0	0	0	0
4614	195	32	2009	8	5	2009-08-05	32	11:40:00	11:40:00	8281	1	9		2	1	2	37.4	0	2			Furvela	1	0	1	0	0	0	0	1
4568	194	32	2009	8	7	2009-08-07	32	10:03:00	10:03:00	7941	1	11		2	1	2	36	0	3			Furvela	0	1	0	0	0	0	0	0
2245	83	33	2003	8	12	2003-08-12	33	9	9	4370	1	9		2	1	2	39.3	1	2			Furvela	5	0	0	0	0	0	1	1
2248	83	33	2003	8	12	2003-08-12	33	0	0.41875		1	11		2	1	2	36.6	0	2			m'bene	3	0	0	0	1	0	0	1
2266	83	33	2003	8	15	2003-08-15	33	0	0.371528	1708	1	9		2	1	2			2			nhalivala	0	1	0	0	0	0	0	0
2270	83	33	2003	8	15	2003-08-15	33	0	0.399306	3922	1	4		2	1	1	37.7	1	2			Furvela	4	0	0	0	0	1	0	1			0	0
2271	83	33	2003	8	15	2003-08-15	33	0	0.406944	2930	1	8		2	1	1	37.9	1	2			Jogo	3	0	0	0	1	0	0	1
1580	57	32	2004	8	9	2004-08-09	33	0	0.376389	1962	1	5		2	1	1	38.4	1	2			Jogo	3	0	0	0	1	0	0	1
1588	58	32	2004	8	10	2004-08-10	33	0	0.377778	4700	1	1		2	1	1	36.9	0	2			Furvela	5	0	0	0	0	0	1	1
1589	58	32	2004	8	11	2004-08-11	33	0	0.336111	4375	1	6		2	1	1			2			Jogo	3	0	0	0	1	0	0	1
1592	58	33	2004	8	12	2004-08-12	33	9	9	6276	1	8		2	1	2	37.9	1	4			M´bene	0	1	0	0	0	0	0	0											resistente
1593	58	33	2004	8	12	2004-08-12	33	0	0.418056	1722	1	7		2	1	1						Furvela	0	1	0	0	0	0	0	0
4586	194	32	2009	8	10	2009-08-10	33	11:07:00	11:07:00	8802	1	8		2	1	1	37.7	1	2			jogo	0	1	0	0	0	0	0	0
4585	194	32	2009	8	10	2009-08-10	33	11:00:00	11:00:00	8432	1	4		2	1	1						Furvela	4	0	0	0	0	1	0	1
4538	193	32	2009	8	11	2009-08-11	33	10?	10?	8562	1	1		2	1	2						Furvela	0	1	0	0	0	0	0	0
4543	193	33	2009	8	12	2009-08-12	33			8408	1	1		2	1	1	37.2	0	2			matumbela	1	0	1	0	0	0	0	1			0	0
4503	192	33	2009	8	13	2009-08-13	33	12:00:00	12:00:00	7941	1	1		2	1	1	37.4	0	1			Furvela	3	0	0	0	1	0	0	1
2215	82	33	2003	8	18	2003-08-18	34	0	0.3875	3327	2			2	1	2	37	0	2			Furvela	3	0	0	0	1	0	0	1
2223	82	34	2003	8	19	2003-08-19	34	0	0.40625	4382	1	1		2	1	2	36	0	2			Furvela	3	0	0	0	1	0	0	1
2227	82	34	2003	8	19	2003-08-19	34	0	0.419444	3210	1	2		2	1	1	36.7	0	2			maxixe	1	0	1	0	0	0	0	1
2231	82	34	2003	8	20	2003-08-20	34	0	0.34375	3612	1	10		2	1	2	38.5	1	2			Jogo	0	1	0	0	0	0	0	0			0	0
2234	82	34	2003	8	20	2003-08-20	34	0	0.378472	3453	1	4		2	1	1			2			matumbela	3	0	0	0	1	0	0	1
2238	82	34	2003	8	21	2003-08-21	34	0	0.377778	4206	1	6		2	1	2			3			jogo	1	0	1	0	0	0	0	1
1607	58	33	2004	8	18	2004-08-18	34	0	0.459722	4448	1	1		2	1	1						Jogo	0	1	0	0	0	0	0	0								hospital
2186	81	34	2003	8	25	2003-08-25	35	0	0.345833	4391	1	2		2	1	2	36.6	0	3			matumbela	3	0	0	0	1	0	0	1			0	0
2204	81	35	2003	8	27	2003-08-27	35	0	0.364583		1	11		2	1	1	39.4	1	1			bovane	3	0	0	0	1	0	0	1						16	530
2200	81	35	2003	8	27	2003-08-27	35	0	0.338889		1	1		2	1	2	37.5	1	2			Furvela	3	0	0	0	1	0	0	1
1633	59	34	2004	8	25	2004-08-25	35	0	0.372222		2			2	1	2			2			Furvela	0	1	0	0	0	0	0	0
1634	59	34	2004	8	25	2004-08-25	35	0	0.376389	4021	1	7		2	1	2						Furvela	0	1	0	0	0	0	0	0
1638	59	35	2004	8	26	2004-08-26	35	0	0.336806	4375	1	6		2	1	1	37	0	3			Jogo	3	0	0	0	1	0	0	1
2140	79	35	2003	9	1	2003-09-01	36	0	0.335417	4014	1	6		2	1	2	38.8	1	2			Furvela	4	0	0	0	0	1	0	1			0	0
2147	79	35	2003	9	1	2003-09-01	36	0	0.379167	3910	1	3		2	1	1	37.8	1	3			matumbela	4	0	0	0	0	1	0	1
2148	79	35	2003	9	1	2003-09-01	36	0	0.376389		1	2		2	1	1						matumbela	0	1	0	0	0	0	0	0
2107	78	36	2003	9	3	2003-09-03	36				1	3		2	1	1	39.2	1	2			bovane	1	0	1	0	0	0	0	1
2164	79	36	2003	9	3	2003-09-03	36	0	0.367361	4415	1	3		2	1	2	36.1	0	3			matumbela	1	0	1	0	0	0	0	1
2112	78	36	2003	9	4	2003-09-04	36				1	4		2	1	2	36.4	0	2			matumbela	0	1	0	0	0	0	0	0
2114	78	36	2003	9	4	2003-09-04	36	0	0.392361	1660	1	5		2	1	1			2			Furvela	4	0	0	0	0	1	0	1
2115	78	36	2003	9	4	2003-09-04	36			3327	1	1		2	1	1	37.4	0	2			Furvela	3	0	0	0	1	0	0	1
1649	60	35	2004	8	30	2004-08-30	36	0	0.379167		1	8		2	1	2						M´bene	0	1	0	0	0	0	0	0
1664	61	36	2004	9	2	2004-09-02	36	0	0.417361	3649	2			2	1	2	36.6	0	2			Jogo	3	0	0	0	1	0	0	1
2127	78	37	2003	9	9	2003-09-09	37	8	8	4006	1	3		2	1	2			2			matumbela	0	1	0	0	0	0	0	0			0	0				hospital
2132	78	37	2003	9	9	2003-09-09	37	0	0.375694	3900	1	2		2	1	2	38.4	1	4			matumbela	4	0	0	0	0	1	0	1											r
2083	77	37	2003	9	10	2003-09-10	37	0	0.407639		1	5		2	1	2	37.5	1	2			jogo	4	0	0	0	0	1	0	1
2085	77	37	2003	9	10	2003-09-10	37	0	0.426389	3759	1	3		2	1	1						matumbela	3	0	0	0	1	0	0	1
2089	77	37	2003	9	11	2003-09-11	37	9	9	4429	1	5		2	1	1						Furvela	0	1	0	0	0	0	0	0
2092	77	37	2003	9	11	2003-09-11	37	0	0.404167	4430	1	3		2	1	2	37.5	1				matumbela	0	1	0	0	0	0	0	0								hospital
2097	77	37	2003	9	12	2003-09-12	37			4431	1	7		2	1	2	36.8	0	2			bovane	0	0	0	0	0	0	0	0			0	0				hospital
2100	77	37	2003	9	12	2003-09-12	37	0	0.407639	3132	1	4		2	1	1	37.1	0	2			Furvela	0	1	0	0	0	0	0	0
3414	154	37	2003	9	12	2003-09-12	37	9	9	4370	1	9		2	1	2	39.9	1	3				0	1	0	0	0	0	0	0			0	0
2098	77	37	2003	9	12	2003-09-12	37	0	0.365278		1	5		2	1	2	40.6	1	4			vembane	3	0	0	0	1	0	0	1
3417	154	37	2003	9	12	2003-09-12	37	0	0.41875		1	11		2	1	2						Furvela	0	1	0	0	0	0	0	0
1678	61	36	2004	9	8	2004-09-08	37	0	0.380556	3659	2			2	1	1			2			Furvela	0	1	0	0	0	0	0	0
1677	61	36	2004	9	8	2004-09-08	37	0	0.35625	1962	1	6		2	1	1						Jogo	0	1	0	0	0	0	0	0			0	0	1
1684	62	37	2004	9	9	2004-09-09	37	0	0.413194	6344	1	1		2	1	1						Furvela	0	1	0	0	0	0	0	0
1690	62	37	2004	9	10	2004-09-10	37	0	0.465972	3888	1	8		2	1	2	37.3	0	3			Xibaela	0	1	0	0	0	0	0	0			0	0				hospital
3947	172	37	2008	9	10	2008-09-10	37	09:02:00	09:02:00	8197	1	3		2	1	2	37.7	1	3			Jogo	0	1	0	0	0	0	0	0						7	500
3435	154	37	2003	9	15	2003-09-15	38	0	0.371528	1708	1	9		2	1	2			2			nhalivala	0	1	0	0	0	0	0	0			0	0
3440	154	37	2003	9	15	2003-09-15	38	0	0.406944	2930	1	8		2	1	1	36.4	0	3			Furvela	3	0	0	0	1	0	0	1
2103	77	37	2003	9	15	2003-09-15	38	0	0.335417		1	1		2	1	2						Furvela	0	1	0	0	0	0	0	0
3439	154	37	2003	9	15	2003-09-15	38	0	0.413194	3922	1	4		2	1	2						jogo	0	1	0	0	0	0	0	0
2046	76	38	2003	9	16	2003-09-16	38	0	0.329861	3333	1	2		2	1	2	40.1	1	3			muengue	4	0	0	0	0	1	0	1
2047	76	38	2003	9	16	2003-09-16	38	0	0.336111	2848	1	6		2	1	2	39.5	1	3			Furvela	5	0	0	0	0	0	1	1
2056	76	38	2003	9	17	2003-09-17	38	11	11	3192	1	6		2	1	2	36	0	2			jogo	1	0	1	0	0	0	0	1			0	0
2054	76	38	2003	9	17	2003-09-17	38	0	0.445833	3042	1	5		2	1	2						jogo	0	1	0	0	0	0	0	0
2061	76	38	2003	9	18	2003-09-18	38	0	0.404167	3003	1	4		2	1	1	37.3	0	2			matumbela	0	1	0	0	0	0	0	0
2064	76	38	2003	9	18	2003-09-18	38	0	0.422917	3802	1	7		2	1	1	38.8	1				jogo	3	0	0	0	1	0	0	1
2065	76	38	2003	9	18	2003-09-18	38	0	0.453472				2	2	1	1						Furvela	0	1	0	0	0	0	0	0
2068	76	38	2003	9	19	2003-09-19	38	0	0.329861	4442	1	2		2	1	2	37.1	0	2			Furvela	5	0	0	0	0	0	1	1
1693	62	37	2004	9	13	2004-09-13	38	0	0.41875	6358	1	1		2	1	1						Jogo	0	1	0	0	0	0	0	0
1702	62	37	2004	9	14	2004-09-14	38	10	10		1	9		2	1	1						Matumbela	4	0	0	0	0	1	0	1
1705	62	37	2004	9	15	2004-09-15	38	0	0.40625		1	9		2	1	1						Furvela	3	0	0	0	1	0	0	1
1713	63	38	2004	9	17	2004-09-17	38	0	0.371528		1	9		2	1	2	36.9	0	2			Jogo	1	0	1	0	0	0	0	1
3963	172	37	2008	9	15	2008-09-15	38	09:08:00	09:08:00	7772	1	3		2	1	2	39.6	1	3			muengue	4	0	0	0	0	1	0	1
3969	172	38	2008	9	16	2008-09-16	38	09:18:00	09:18:00	8204	1	8		2	1	2						jogo	0	1	0	0	0	0	0	0			0	0
3928		38	2008	9	17	2008-09-17	38	11:27:00	11:27:00	8162	1	5		2	1	1	37.4	0	1				0	1	0	0	0	0	0	0
3918		38	2008	9	17	2008-09-17	38	10:16:00	10:16:00	8207	1	4		2	1	2	35.6	0	3			jogo	4	0	0	0	0	1	0	1
3931		38	2008	9	19	2008-09-19	38	08:41:00	08:41:00	7657	1	10		2	1	2	38.4	1	2			Furvela	0	1	0	0	0	0	0	0
3929		38	2008	9	19	2008-09-19	38	08:24:00	08:24:00		2			2	1	1	39.5	1				jogo	4	0	0	0	0	1	0	1			0	0
2033	75	39	2003	9	23	2003-09-23	39	0	0.334028	3333	1	1		2	1	1	36	0	2			furvela	3	0	0	0	1	0	0	1
2040	75	39	2003	9	23	2003-09-23	39	0	0.417361		1	6		2	1	2	37.9	1	3			furvela	3	0	0	0	1	0	0	1
2041	75	39	2003	9	23	2003-09-23	39	0	0.439583		1	2		2	1	2						matumbela	1	0	1	0	0	0	0	1
1985	74	39	2003	9	24	2003-09-24	39	0	0.334028	3900	1	3		2	1		37.9	1	2			Furvela	1	0	1	0	0	0	0	1
1722	63	38	2004	9	21	2004-09-21	39	0	0.377083	6367	1	4		2	1	1	36.4	0	3			Furvela	3	0	0	0	1	0	0	1			0	0
1735	63	39	2004	9	24	2004-09-24	39	0	0.378472	4232	1	6		2	1	1	38.6	1	1			Furvela	5	0	0	0	0	0	1	1								hospital
1738	63	39	2004	9	24	2004-09-24	39	0	0.434028		1	11		2	1	2			2			Matumbela	0	1	0	0	0	0	0	0
3901	170	39	2008	9	23	2008-09-23	39			8204	1	8		2	1	1	36	0	2			Furvela	0	1	0	0	0	0	0	0
3902	170	39	2008	9	23	2008-09-23	39	10:22:00	10:22:00	8222	1	9		2	1	1	35.8	0	2			Jogo	0	1	0	0	0	0	0	0			0	0
3976	173	39	2008	9	24	2008-09-24	39	09:35:00	09:35:00	8135	1	2		2	1	1	35					Jogo	3	0	0	0	1	0	0	1
3985	173	39	2008	9	26	2008-09-26	39	10:30:00	10:30:00	7555	1	11		2	1	1			3				0	1	0	0	0	0	0	0
3980	173	39	2008	9	26	2008-09-26	39	08:52:00	08:52:00	8129	1	4		2	1	2	36.5	0				Furvela	3	0	0	0	1	0	0	1											r
3983	173	39	2008	9	26	2008-09-26	39	09:25:00	09:25:00	7807	1	8		2	1	2	41	1				jogo	1	0	1	0	0	0	0	1
4522	192	38	2009	9	22	2009-09-22	39	08:41:00	08:41:00	8816	1	9		2	1	2	38.2	1	2			Furvela	3	0	0	0	1	0	0	1
2007	74	39	2003	9	29	2003-09-29	40	0	0.386111	4442	1	2		2	1	2	37.4	0	2			Jogo	1	0	1	0	0	0	0	1			0	0
2013	74	39	2003	9	29	2003-09-29	40	0	0.774306		1	7		2	1	1	37.4	0	2			Furvela	3	0	0	0	1	0	0	1
2009	74	39	2003	9	29	2003-09-29	40	0	0.392361	3189	1	4		2	1	1	38.7	1				furvela	4	0	0	0	0	1	0	1
1983	73	40	2003	9	30	2003-09-30	40	0	0.420139		1	11		2	1	2	36.6	0	2			Furvela	1	0	1	0	0	0	0	1
1980	73	40	2003	9	30	2003-09-30	40	0	0.429167	2214	1	11		2	1	2	39.4	1	3			Jogo	3	0	0	0	1	0	0	1
1977	73	40	2003	9	30	2003-09-30	40	0	0.334722	3042	1	5		2	1	1	36.7	0				Jogo	0	1	0	0	0	0	0	0
1750	64	39	2004	9	28	2004-09-28	40	0	0.371528	4328	2			2	1	1			2			Furvela	4	0	0	0	0	1	0	1			0	0
1751	64	39	2004	9	28	2004-09-28	40	0	0.376389	6365	2			2	1	1	36	0				singa	0	1	0	0	0	0	0	0
1757	64	39	2004	9	29	2004-09-29	40	0	0.415278		2			2	1	1			2			Jogo	0	1	0	0	0	0	0	0
1760	64	40	2004	9	30	2004-09-30	40	0	0.295139		1	3		2	1	1	37.4	0	2			Matumbela	3	0	0	0	1	0	0	1
1765	64	40	2004	9	30	2004-09-30	40	12	12		1	11		2	1	2	39.2	1				Jogo	0	1	0	0	0	0	0	0			0	0
1767	65	40	2004	10	1	2004-10-01	40	0	0.377083		1	5		2	1	2	37.8	1	2			Wengue	3	0	0	0	1	0	0	1
5700	231		2008	9	29	2008-09-29	40			8070	1.5			2		1	367					matumbela	4
5733	231		2008	9	30	2008-09-30	40				1.1			2		2	388					Furvela
5729	231		2008	9	30	2008-09-30	40				1.4			2		2	372					Furvela																hospital
1772	65	40	2004	10	4	2004-10-04	41	0	0.350694	1722	1	4		2	1	1	36	0				Jogo	1	0	1	0	0	0	0	1
1781	65	40	2004	10	5	2004-10-05	41	0	0.369444	6383	1	1		2	1	1	36.2	0				Jogo	4	0	0	0	0	1	0	1
5740	232		2008	10	6	2008-10-06	41				1.9			2		1			2		s	Furvela	3										0	0
5734	232		2008	10	6	2008-10-06	41				1.1			2		2			4			Furvela	0										0	0
5752	232		2008	10	7	2008-10-07	41				1.7			2		2			1		n	jogo	1										0	0
5756	232		2008	10	8	2008-10-08	41				1.11			2		1					s	Furvela	4
5763	232		2008	10	9	2008-10-09	41				1.1			2		2	388					Furvela	5										0	0
5765	232		2008	10	9	2008-10-09	41				1.3			2		2				1		jogo	0
5766	232		2008	10	9	2008-10-09	41				1.3			2		1	376				s	jogo	1
1957	72	41	2004	10	11	2004-10-11	42	0	0.386111	6316	1	1		2	1	2	37.7	1	3			Jogo	5	0	0	0	0	0	1	1			0	0
1973	72	41	2004	10	13	2004-10-13	42	0	0.470139	6367	1	5		2	1	2	37.7	1	1			furvela	1	0	1	0	0	0	0	1
1972	72	41	2004	10	13	2004-10-13	42	11	11	4488	1	4		2	1	2	37	0	2			Jogo	3	0	0	0	1	0	0	1
1971	72	41	2004	10	13	2004-10-13	42	0	0.450694	4328	2			2	1	1						furvela	0	1	0	0	0	0	0	0
1791	66	42	2004	10	14	2004-10-14	42	0	0.295139	4448	1	3		2	1	2	39	1	2			Furvela	5	0	0	0	0	0	1	1			0	0				hospital
1795	66	42	2004	10	14	2004-10-14	42	0	0.475694	6395	1	9		2	1	2	36.6	0	2			Jogo	0	1	0	0	0	0	0	0
1802	66	42	2004	10	18	2004-10-18	43	0	0.406944	4562	1	7		2	1	1	39	1	2			Xixe	4	0	0	0	0	1	0	1
1809	66	42	2004	10	19	2004-10-19	43	0	0.386111	6402	1	3		2	1	1	36	0	1			Furvela	1	0	1	0	0	0	0	1
1811	66	42	2004	10	19	2004-10-19	43	10	10	1722	1	4		2	1	2	39.2	1	2			Furvela	3	0	0	0	1	0	0	1
1805	66	42	2004	10	19	2004-10-19	43	0	0.334722		1	10		2	1	1			6			Furvela	4	0	0	0	0	1	0	1			0	0
1816	66	42	2004	10	20	2004-10-20	43	0	0.377778	1928	1	1		2	1	1	38.5	1	2			Jogo	1	0	1	0	0	0	0	1
1817	66	42	2004	10	20	2004-10-20	43	0	0.378472		1	2		2	1	1	34.6		5		TR	Jogo	4	0	0	0	0	1	0	1			0	0
1826	67	43	2004	10	21	2004-10-21	43	0	0.4		1	11		2	1	2						Furvela	0	1	0	0	0	0	0	0
1827	67	43	2004	10	21	2004-10-21	43	10	10	6407	1	4		2	1	2						Furvela	0	1	0	0	0	0	0	0								hospital
1830	67	43	2004	10	22	2004-10-22	43	0	0.375694	5045	1	7		2	1	2	35.6	0	3			Furvela	1	0	1	0	0	0	0	1			0	0
1836	67	43	2004	10	26	2004-10-26	44	0	0.34375	6414	2			2	1	2	38.6	1	3			Matumbela	0	1	0	0	0	0	0	0
1839	67	44	2004	10	28	2004-10-28	44	0	0.470833		1	9		2	1	1	35.6	0	2			Chocwe	3	0	0	0	1	0	0	1			0	0
1848	68	44	2004	11	1	2004-11-01	45	0	0.336806	6416	1	5		2	1	1	38.4	1	2			Matumbela	5	0	0	0	0	0	1	1
1851	68	44	2004	11	1	2004-11-01	45	0	0.41875	4706	1	3		2	1	2	35.5	0	2			Furvela	3	0	0	0	1	0	0	1
1854	68	44	2004	11	2	2004-11-02	45	0	0.377778	1882	1	3		2	1	1	39.2	1	2			Jogo	0	1	0	0	0	0	0	0
1864	68	45	2004	11	5	2004-11-05	45	0	0.377083	6425	2			2	1	2	40	1	2			Furvela	0	1	0	0	0	0	0	0			0	0				hospital
5246	216	45	2008	11	5	2008-11-05	45	10:50:00	10:50:00	8323	1	5		2	1	2	38.5	1	3			Furvela	3	0	0	0	1	0	0	1			0	0
5251	216	45	2008	11	6	2008-11-06	45	09:03:00	09:03:00	7751	1	4		2	1	2						jogo	1	0	1	0	0	0	0	1			0	0
1867	68	45	2004	11	8	2004-11-08	46	0	0.421528	6034	1	3		2	1	2			2			Furvela	0	1	0	0	0	0	0	0
1866	68	45	2004	11	8	2004-11-08	46	0	0.413194		2			2	1	2	38.2	1	2			Jogo	0	1	0	0	0	0	0	0			0	0
1870	68	45	2004	11	8	2004-11-08	46	11	11	6426	2			2	1	1	37.3	0	5			Jogo	0	1	0	0	0	0	0	0
1865	68	45	2004	11	8	2004-11-08	46	0	0.377083	1897	1	7		2	1	1	36.7	0				Furvela	0	1	0	0	0	0	0	0
1868	68	45	2004	11	8	2004-11-08	46	0	0.438889	1722	1	4		2	1	1						Nhaca	3	0	0	0	1	0	0	1			0	0
1874	68	45	2004	11	10	2004-11-10	46	0	0.336806	3035	1	10		2	1	2	36.9	0	3			Chibaela	0	1	0	0	0	0	0	0
1881	69	45	2004	11	11	2004-11-11	46	0	0.335417		2			2	1	1	36.4	0	1			Jogo	0	1	0	0	0	0	0	0
1889	69	46	2004	11	12	2004-11-12	46	0	0.378472	6430	1	5		2	1	2	38.1	1	4			Jogo	0	1	0	0	0	0	0	0
5259	216	45	2008	11	10	2008-11-10	46	08:29:00	08:29:00	8329	1	5		2	1	2						jogo	2	0	0	1	0	0	0	1			3	0	0
5266	216	45	2008	11	11	2008-11-11	46	10?	10?	7941	1	2		2	1	2	39	1	2			Furvela	3	0	0	0	1	0	0	1
5267	216	45	2008	11	11	2008-11-11	46	11:40:00	11:40:00	7692	1	5		2	1	2	37.8	1	2			matumbela	1	0	1	0	0	0	0	1			0	0
5206	215	46	2008	11	12	2008-11-12	46	08:18:00	08:18:00	8331	1	7		2	1	2			3			ucucho	0	1	0	0	0	0	0	0
5223	215	46	2008	11	13	2008-11-13	46	08:47:00	08:47:00	7657	2			2	1	2	37.3	0	2			jogo	1	0	1	0	0	0	0	1
5225	215	46	2008	11	13	2008-11-13	46	09:14:00	09:14:00	8103	1	4		2	1	2	37.1	0	3			Furvela	3	0	0	0	1	0	0	1
5310	218	46	2008	11	14	2008-11-14	46	09:58:00	09:58:00	8310	1	3		2	1	1			2			Furvela	4	0	0	0	0	1	0	1								hospital
5314	218	46	2008	11	14	2008-11-14	46	11:11:00	11:11:00		1	6		2	1	1	39.2	1				jogo	0	1	0	0	0	0	0	0
1894	69	46	2004	11	15	2004-11-15	47	0	0.420139	3669	2			2	1	1			2			Furvela	0	1	0	0	0	0	0	0			0	0
1904	69	46	2004	11	17	2004-11-17	47	0	0.421528		1	11		2	1	2						Jogo	1	0	1	0	0	0	0	1
1907	70	46	2004	11	18	2004-11-18	47	0	0.365972	4765	1	8		2	1	1	38.2	1	1			Furvela	4	0	0	0	0	1	0	1
1910	70	47	2004	11	19	2004-11-19	47	0	0.336806	4773	1	2		2	1	2	38.4	1	2			Furvela	1	0	1	0	0	0	0	1			0	0
5318	218	46	2008	11	17	2008-11-17	47	09:09:00	09:09:00	8258	1	2		2	1	2							1	0	1	0	0	0	0	1			0	0
5328	218	46	2008	11	17	2008-11-17	47	10:04:00	10:04:00	7438	1	10		2	1	1	37.1	0				Furvela	3	0	0	0	1	0	0	1
5274	217	46	2008	11	18	2008-11-18	47	08:28:00	08:28:00	7692	1	4		2	1	2	38.4	1				Furvela	4	0	0	0	0	1	0	1
5295	217	47	2008	11	19	2008-11-19	47	10:31:00	10:31:00	7594	1	10		2	1	2	37.2	0				matumbela	4	0	0	0	0	1	0	1			0	0
5293	217	47	2008	11	19	2008-11-19	47	09:56:00	09:56:00	7856	2			2	1	2	37.4	0				Furvela	2	0	0	1	0	0	0	1
5300	217	47	2008	11	20	2008-11-20	47	08:48:00	08:48:00	8017	1	2		2	1	2						Furvela	0	1	0	0	0	0	0	0
5356	219	47	2008	11	21	2008-11-21	47	09:27:00	09:27:00	8350	1	1		2	1	1			2			Furvela	2	0	0	1	0	0	0	1
5353	219	47	2008	11	21	2008-11-21	47	08:44:00	08:44:00	7678	1	9		2	1	2	38.6	1	3			Furvela	5	0	0	0	0	0	1	1
5355	219	47	2008	11	21	2008-11-21	47	09:17:00	09:17:00	8163	1	1		2	1	2	39.6	1				jogo	3	0	0	0	1	0	0	1
5360	219	47	2008	11	21	2008-11-21	47	09:51:00	09:51:00		2			2	1	2						jogo	0	1	0	0	0	0	0	0			0	0
1921	70	47	2004	11	22	2004-11-22	48	0	0.378472	4711	1	6		2	1	2						Furvela	0	1	0	0	0	0	0	0
1926	70	47	2004	11	23	2004-11-23	48	0	0.434028		2			2	1	2	38.9	1	1			Furvela	4	0	0	0	0	1	0	1			0	0
1923	70	47	2004	11	23	2004-11-23	48	0	0.357639	1950	1	9		2	1	1	37.5	1	2			Furvela	3	0	0	0	1	0	0	1
5173	214	47	2008	11	24	2008-11-24	48	08:34:00	08:34:00	8352	1	4		2	1	1	36.6	0	1			Furvela	0	1	0	0	0	0	0	0
5177	214	47	2008	11	24	2008-11-24	48	09:06:00	09:06:00	7966	1	4		2	1	2	39.9	1	3			jogo	4	0	0	0	0	1	0	1
5175	214	47	2008	11	24	2008-11-24	48	08:42:00	08:42:00	7590	1	5		2	1	1							3	0	0	0	1	0	0	1
5197	214	47	2008	11	25	2008-11-25	48	10:31:00	10:31:00	7806	1	2		2	1	2			3			Furvela	3	0	0	0	1	0	0	1			0	0
5195	214	47	2008	11	25	2008-11-25	48	10:04:00	10:04:00	8359	1	10		2	1	1						Furvela	0	1	0	0	0	0	0	0
5143	213	48	2008	11	26	2008-11-26	48	10:42:00	10:42:00	7561	2			2	1	1	36	0	2			Furvela	3	0	0	0	1	0	0	1
5141	213	48	2008	11	26	2008-11-26	48			8058	1	2		2	1	1	37.1	0				Furvela	2	0	0	1	0	0	0	1			0	0		10	500
5155	213	48	2008	11	27	2008-11-27	48			8368	1	7		2	1	2	39.7	1	2			Furvela	4	0	0	0	0	1	0	1											r
5153	213	48	2008	11	27	2008-11-27	48	9?	9?		1	2		2	1	2						nharrumbo	0	1	0	0	0	0	0	0			0	0
5161	213	48	2008	11	28	2008-11-28	48	08:50:00	08:50:00	7688	1	2		2	1	1	39	1	1			h de lihonzuane	5	0	0	0	0	0	1	1			0	0				hospital
5169	213	48	2008	11	28	2008-11-28	48	10:28:00	10:28:00	7594	1	10		2	1	2	37.1	0	3			jogo	5	0	0	0	0	0	1	1			0	0
1937	71	48	2004	11	29	2004-11-29	49	0	0.330556	5507	1	6		2	1	1	36.6	0	3			Matumbela	3	0	0	0	1	0	0	1
1941	71	48	2004	11	29	2004-11-29	49	9	9	4576	1	6		2	1	2	36.6	0	3			Jogo	3	0	0	0	1	0	0	1			0	0
1939	71	48	2004	11	29	2004-11-29	49	0	0.35625	6449	2			2	1	2	36.3	0	3			Jogo	4	0	0	0	0	1	0	1			0	0
1945	71	48	2004	11	30	2004-11-30	49	0	0.330556		1	5		2	1	2			2			Furvela	0	1	0	0	0	0	0	0
1949	71	48	2004	11	30	2004-11-30	49	0	0.382639		1	1		2	1	2	39.7	1	2			Jogo	5	0	0	0	0	0	1	1
1946	71	48	2004	11	30	2004-11-30	49	0	0.338889	6311	1	4		2	1	1						Furvela	0	1	0	0	0	0	0	0			0	0
4235	182	48	2008	12	1	2008-12-01	49	08:57:00	08:57:00	8034	1	5		2	1	2			2			matumbela	0	1	0	0	0	0	0	0			0	0
4248	182	48	2008	12	2	2008-12-02	49	09:41:00	09:41:00	7686	1	10		2	1	1			3			Furvela	0	1	0	0	0	0	0	0
4250	182	48	2008	12	2	2008-12-02	49	10:03:00	10:03:00		1	3		2	1	2	39	1	3			h homoine	0	1	0	0	0	0	0	0
4251	182	48	2008	12	2	2008-12-02	49	10:12:00	10:12:00		1	3		2	1	2	38.5	1				Furvela	3	0	0	0	1	0	0	1			1	0	0
4245	182	48	2008	12	2	2008-12-02	49	09:12:00	09:12:00	8377	2			2	1	2	36.9	0				jogo	0	0	0	0	0	0	0	0
4256	182	49	2008	12	3	2008-12-03	49	08:50:00	08:50:00	7639	1	9		2	1	1						Furvela	0	1	0	0	0	0	0	0
4200	181	49	2008	12	8	2008-12-08	50	09:50:00	09:50:00		1	3		2	1	1	38.1	1	2			jogo	1	0	1	0	0	0	0	1			0	0
4211	181	49	2008	12	8	2008-12-08	50	10:50:00	10:50:00		1	1		2	1	2			2			Furvela	1	0	1	0	0	0	0	1			1	0	0
4259	182	49	2008	12	8	2008-12-08	50	09:00:00	09:00:00	8379	1	10		2	1	1	38.6	1	3			Furvela	3	0	0	0	1	0	0	1			0	0
4204	181	49	2008	12	8	2008-12-08	50	10:17:00	10:17:00	7585	1	10		2	1	2	38	1				jogo	5	0	0	0	0	0	1	1			0	0
4214	181	49	2008	12	8	2008-12-08	50	11:02:00	11:02:00	8052	1	11		2	1	2						h cambine	4	0	0	0	0	1	0	1			0	3	1
4263	182	49	2008	12	8	2008-12-08	50	09:19:00	09:19:00	8258	1	3		2	1	1						h lihonzuane	0	1	0	0	0	0	0	0			0	0
4225	181	49	2008	12	9	2008-12-09	50	10:16:00	10:16:00	8386	1	5		2	1	2						Furvela	2	0	0	1	0	0	0	1
4172	180	50	2008	12	10	2008-12-10	50	10:22:00	10:22:00	7996	1	1		2	1	1	39.5	1	2			Furvela	2	0	0	1	0	0	0	1			0	0
4175	180	50	2008	12	10	2008-12-10	50			7691	1	9		2	1	1	36.1	0	2			jogo	4	0	0	0	0	1	0	1			0	0
4166	180	50	2008	12	10	2008-12-10	50	09:31:00	09:31:00		1	11		2	1	1	38	1				Furvela	1	0	1	0	0	0	0	1
4182	180	50	2008	12	11	2008-12-11	50	10:10:00	10:10:00	8070	1	8		2	1	2						Furvela	3	0	0	0	1	0	0	1			0	0
4288	183	50	2008	12	15	2008-12-15	51	10:13:00	10:13:00	8142	1	1		2	1	2			2			matumbela	0	1	0	0	0	0	0	0
4296	183	50	2008	12	15	2008-12-15	51	11:16:00	11:16:00	8030	1	2		2	1	1			2			jogo	4	0	0	0	0	1	0	1
4281	183	50	2008	12	15	2008-12-15	51	09:14:00	09:14:00	8403	1	6		2	1	1			3			Furvela	3	0	0	0	1	0	0	1			0	0
4285	183	50	2008	12	15	2008-12-15	51	09:41:00	09:41:00	7791	1	10		2	1	1	36.7	0	3			jogo	3	0	0	0	1	0	0	1
4298	183	50	2008	12	15	2008-12-15	51	11:35:00	11:35:00	7751	1	5		2	1	2	39	1	3			jogo	3	0	0	0	1	0	0	1
4286	183	50	2008	12	15	2008-12-15	51	09:53:00	09:53:00	8405	2			2	1	1			3			Furvela	5	0	0	0	0	0	1	1			0	0
4283	183	50	2008	12	15	2008-12-15	51	09:26:00	09:26:00		1	3		2	1	1						Furvela	1	0	1	0	0	0	0	1			0	0
4292	183	50	2008	12	15	2008-12-15	51	10:40:00	10:40:00	7671	1	10		2	1	2						Furvela	3	0	0	0	1	0	0	1
4133	179	51	2008	12	17	2008-12-17	51			7941	1	3		2	1	2	36.1	0	2			jogo	4	0	0	0	0	1	0	1
4136	179	51	2008	12	18	2008-12-18	51	08:19:00	08:19:00	8066	1	3		2	1	2						Furvela	0	1	0	0	0	0	0	0
4152	179	51	2008	12	18	2008-12-18	51	11:58:00	11:58:00		1	8		2	1	1	36	0				bovane	4	0	0	0	0	1	0	1			0	0				hospital
4304	184	51	2008	12	19	2008-12-19	51			7897	1	9		2	1	2			2			jogo	2	0	0	1	0	0	0	1			0	0
4308	184	51	2008	12	22	2008-12-22	52	08:57:00	08:57:00	7751	1	5		2	1	2	38.6	1	2			Furvela	5	0	0	0	0	0	1	1			0	0
4312	184	51	2008	12	22	2008-12-22	52	09:18:00	09:18:00	7688	1	3		2	1	2						homoine	0	1	0	0	0	0	0	0
4318	184	51	2008	12	22	2008-12-22	52	10:47:00	10:47:00	8142	1	1		2	1	1	38.4	1				jogo	4	0	0	0	0	1	0	1			0	0
4336	185	1	2007	1	3	2007-01-03	1	09:40:00	09:40:00	6681	3			3	2	1			3			Furvela	0	1	0	0	0	0	0	0
4339	185	1	2007	1	3	2007-01-03	1	10:35:00	10:35:00	3669	4	4		3	2	1			3			Furvela	0	1	0	0	0	0	0	0
4334	185	1	2007	1	3	2007-01-03	1	08:54:00	08:54:00		2	3		3	2	2	36.7	0	3			jogo	4	0	0	0	0	1	0	1
4335	185	1	2007	1	3	2007-01-03	1	09:12:00	09:12:00		3			3	2	1			3			jogo	1	0	1	0	0	0	0	1			0	0
4341	185	1	2007	1	4	2007-01-04	1	08:28:00	08:28:00	7296	2	5		3	2	2	38.4	1	3			Jogo	0	1	0	0	0	0	0	0			0	0
4344	185	1	2007	1	4	2007-01-04	1	10:04:00	10:04:00	6785	2	4		3	2	2	39.5	1				Furvela	0	1	0	0	0	0	0	0
4350	185	1	2007	1	5	2007-01-05	1	09:30:00	09:30:00	7210	2	4		3	2	2	37	0	3			m`bene	4	0	0	0	0	1	0	1
3445	155	1	2008	1	3	2008-01-03	1	0	0.407639	6817	2	5		3	2	2			3			Furvela	4	0	0	0	0	1	0	1
3454	155	1	2008	1	4	2008-01-04	1	0	0.407639	7054	2	2		3	2	2			3			jogo	0	1	0	0	0	0	0	0			0	0
3455	155	1	2008	1	4	2008-01-04	1	0	0.414583	7798	2	4		3	2	2						Furvela	0	1	0	0	0	0	0	0
301	11	2	2004	1	7	2004-01-07	2	0	0.456944	1747	4	6		3	2	1			2			Furvela	0	1	0	0	0	0	0	0
294	11	2	2004	1	7	2004-01-07	2	0	0.385417		4			3	2	1			2			Furvela	3	0	0	0	1	0	0	1
307	11	2	2004	1	8	2004-01-08	2	0	0.345833		2	1		3	2	1	36.6	0	2			Matumbela	1	0	1	0	0	0	0	1
29	2	2	2004	1	8	2004-01-08	2	0	0.421528	39	4			3	2	1			2			Furvela	1	0	1	0	0	0	0	1
308	11	2	2004	1	8	2004-01-08	2	0	0.350694		4			3	2	1	37.8	1	2			Furvela	0	1	0	0	0	0	0	0
39	2	2	2004	1	9	2004-01-09	2	0	0.359722	226	3	4		3	2	1			2			Furvela	1	0	1	0	0	0	0	1
38	2	2	2004	1	9	2004-01-09	2	0	0.334028	4857	4			3	2	1	38	1	2			Furvela	1	0	1	0	0	0	0	1			0	0
45	2	2	2004	1	9	2004-01-09	2	0	0.40625	4859	4			3	2	2	38.3	1	2			Furvela	1	0	1	0	0	0	0	1			0	0
44	2	2	2004	1	9	2004-01-09	2	0	0.377778		2	4		3	2	1	37.6	1	2			Furvela	0	1	0	0	0	0	0	0			0	0
4364	186	2	2007	1	8	2007-01-08	2	11:50:00	11:50:00		3	9		3	2	2			3			matumbela	1	0	1	0	0	0	0	1
4354	186	2	2007	1	8	2007-01-08	2	08:23:00	08:23:00		3	11		3	2	2	35.9	0	3			Chidanga	1	0	1	0	0	0	0	1
4367	186	2	2007	1	9	2007-01-09	2	09:07:00	09:07:00	7320	2	10		3	2	2	39.4	1	3			jogo	2	0	0	1	0	0	0	1
4366	186	2	2007	1	9	2007-01-09	2	08:38:00	08:38:00	6748	2	6		3	2	2							1	0	1	0	0	0	0	1								hospital
4383	187	2	2007	1	11	2007-01-11	2	10:47:00	10:47:00	7326	2	4		3	2	2	36.7	0	3		TR pf(+)	Furvela	4	0	0	0	0	1	0	1
4382	187	2	2007	1	11	2007-01-11	2	10:03:00	10:03:00	7325	2	1		3	2	2	37.1	0	3			Furvela	5	0	0	0	0	0	1	1
4394	187	2	2007	1	12	2007-01-12	2	10:30:00	10:30:00	1981	3			3	2	2			3			jogo	5	0	0	0	0	0	1	1
4389	187	2	2007	1	12	2007-01-12	2	09:13:00	09:13:00	1995	4	3		3	2	2	38	1	3			bovane	1	0	1	0	0	0	0	1			0	0
3473	155	2	2008	1	7	2008-01-07	2	0	0.477778	7022	2	3		3	2	1			3			Furvela	0	1	0	0	0	0	0	0			0	0
3484	156	2	2008	1	8	2008-01-08	2	0	0.461111	6410	3	9		3	2	2	37.6	1	3			Jogo	0	1	0	0	0	0	0	0
3479	156	2	2008	1	8	2008-01-08	2	0	0.336111	6984	3	4		3	2	1	36.4	0	3			Furvela	0	1	0	0	0	0	0	0
3508	157	2	2008	1	11	2008-01-11	2	0	0.377778		2	4		3	2	2						matumbela	0	1	0	0	0	0	0	0
259	10	2	2004	1	12	2004-01-12	3	0	0.377083	4861	2	6		3	2	2			2			Jogo	0	1	0	0	0	0	0	0
278	10	2	2004	1	12	2004-01-12	3	0	0.420139	269	3	4		3	2	1	37	0	2			Furvela	1	0	1	0	0	0	0	1
255	10	2	2004	1	12	2004-01-12	3	0	0.375694		2	3		3	2	1			2			Wengue	1	0	1	0	0	0	0	1
206	8	2	2004	1	13	2004-01-13	3	0	0.427083		2	8		3	2	1			2			Matumbela	1	0	1	0	0	0	0	1								hospital
219	8	3	2004	1	14	2004-01-14	3	0	0.398611		3	3		3	2	1	36.5	0	2			jogo	0	1	0	0	0	0	0	0
214	8	3	2004	1	14	2004-01-14	3	0	0.336111	4880	3			3	2	2	36.7	0	2			matumbela	1	0	1	0	0	0	0	1			0	0
222	8	3	2004	1	14	2004-01-14	3	0	0.454167		4			3	2	1	35.8	0				Furvela	0	1	0	0	0	0	0	0			0	0
174	7	3	2004	1	15	2004-01-15	3	0	0.375694		2	3		3	2	2			2			Furvela	0	1	0	0	0	0	0	0			0	0
172	7	3	2004	1	15	2004-01-15	3	9	9	4244	2	1		3	2	1			2			bovane	1	0	1	0	0	0	0	1
166	7	3	2004	1	15	2004-01-15	3	0	0.343056	4888	3			3	2	2			2			Furvela	3	0	0	0	1	0	0	1								hospital
178	7	3	2004	1	15	2004-01-15	3	0	0.404167	3167	2	2		3	2	1			2			nhabundo	0	1	0	0	0	0	0	0			0	0
179	7	3	2004	1	15	2004-01-15	3			1747	4	6		3	2	1			2			Furvela	1	0	1	0	0	0	0	1			1		3
187	7	3	2004	1	16	2004-01-16	3	0	0.350694	2718	2	4		3	2	1			2			Jogo	1	0	1	0	0	0	0	1
223	9	3	2004	1	16	2004-01-16	3	0	0.405556	634	3	1		3	2	1	36.9	0	2			Furvela	1	0	1	0	0	0	0	1			0	0
236	9	3	2004	1	16	2004-01-16	3	0	0.482639	4901	4			3	2	1	36.3	0	2			Furvela	2	0	0	1	0	0	0	1
4404	188	3	2007	1	15	2007-01-15	3	10:23:00	10:23:00	6846	2	3		3	2	2	37.9	1	3			Furvela	5	0	0	0	0	0	1	1
4422	188	3	2007	1	17	2007-01-17	3	11:00:00	11:00:00	6448	3	2		3	2	1			3		s	Furvela																hospital
4417	188	3	2007	1	17	2007-01-17	3	08:53:00	08:53:00		4			3	2	2						jogo	2	0	0	1	0	0	0	1
4430	188	3	2007	1	18	2007-01-18	3	09:16:00	09:16:00		4	3		3	2	2			3			Furvela	0	1	0	0	0	0	0	0			0	0
4431	189	3	2007	1	18	2007-01-18	3	09:45:00	09:45:00		4			3	2	2			3			jogo	1	0	1	0	0	0	0	1			0	0
4429	188	3	2007	1	18	2007-01-18	3	09:06:00	09:06:00	7340	2	11		3	2	2						Furvela	3	0	0	0	1	0	0	1
3530	158	3	2008	1	14	2008-01-14	3	0	0.434722	5609	3			3	2	1			3			Furvela	0	1	0	0	0	0	0	0
3514	158	3	2008	1	14	2008-01-14	3	0	0.344444	7821	2	4		3	2	2	38.2	1	3			Furvela	2	0	0	1	0	0	0	1
3535	158	3	2008	1	14	2008-01-14	3	0	0.488889		3			3	2	2			3			nharrumbo	3	0	0	0	1	0	0	1								hospital		TR
3536	158	3	2008	1	14	2008-01-14	3	0	0.461806		4			3	2	1			3			Furvela	0	1	0	0	0	0	0	0			0	0
3534	158	3	2008	1	14	2008-01-14	3	0	0.459722	6773	2	11		3	2	1						Furvela	4	0	0	0	0	1	0	1			0	0
3515	158	3	2008	1	14	2008-01-14	3	0	0.334722	822	4	6		3	2	2						Furvela	1	0	1	0	0	0	0	1
3550	159	3	2008	1	15	2008-01-15	3	0	0.491667	6748	3	6		3	2	2	38.2	1	3			matumbela	1	0	1	0	0	0	0	1			0	0
3538	158	3	2008	1	15	2008-01-15	3	0	0.373611	7835	4			3	2	2	37.9	1	3			jogo	3	0	0	0	1	0	0	1			0	0
3556	159	3	2008	1	15	2008-01-15	3	0	0.580556		3			3	2	2	37.7	1				jogo	0	1	0	0	0	0	0	0
3565	159	3	2008	1	16	2008-01-16	3	0	0.501389	6833	3			3	2	1	36.2	0	3			Furvela	0	1	0	0	0	0	0	0
3567	159	3	2008	1	16	2008-01-16	3	0	0.545833		4			3	2	2	36.6	0	3			Furvela	1	0	1	0	0	0	0	1
3558	159	3	2008	1	16	2008-01-16	3	0	0.373611	6464	3	5		3	2	2			3			Furvela	0	1	0	0	0	0	0	0					1
3559	159	3	2008	1	16	2008-01-16	3	0	0.376389	7104	3			3	2	2						matumbela	0	1	0	0	0	0	0	0			0	0
3580	160	3	2008	1	17	2008-01-17	3	0	0.460417	1101	4			3	2	1			3			Furvela	0	1	0	0	0	0	0	0
3581	160	3	2008	1	17	2008-01-17	3	0	0.461111	6935	2	5		3	2	1						Furvela	0	1	0	0	0	0	0	0
3577	160	3	2008	1	17	2008-01-17	3	0	0.459028	5078	4			3	2	1						Furvela	2	0	0	1	0	0	0	1			0	0
253	9	3	2004	1	19	2004-01-19	4	0	0.397222	4575	2	11		3	2	1			2			Furvela	0	1	0	0	0	0	0	0			0	0
248	9	3	2004	1	19	2004-01-19	4	9	9	4906	4			3	2	2			2			jogo	0	1	0	0	0	0	0	0			0	0
130	6	3	2004	1	19	2004-01-19	4	0	0.377778	608	2	7		3	2	2			2			Jogo	0	1	0	0	0	0	0	0
252	9	3	2004	1	19	2004-01-19	4	0	0.376389		3	3		3	2	2	38.1	1				Furvela	1	0	1	0	0	0	0	1
151	6	3	2004	1	20	2004-01-20	4	0	0.406944	2268	2	5		3	2	2			2			Jogo	1	0	1	0	0	0	0	1
155	6	3	2004	1	20	2004-01-20	4	0	0.468056	4192	2	1		3	2	2			2			Bovane	0	1	0	0	0	0	0	0			0	0
149	6	3	2004	1	20	2004-01-20	4	0	0.336806		3	4		3	2	2			2			matumbela	0	1	0	0	0	0	0	0
156	6	3	2004	1	20	2004-01-20	4	0	0.459722	4517	3			3	2		36.4	0				Matumbela	3	0	0	0	1	0	0	1
159	6	4	2004	1	21	2004-01-21	4	0	0.295139	4919	4			3	2	1			2			Furvela	1	0	1	0	0	0	0	1
110	5	4	2004	1	22	2004-01-22	4	0	0.431944	74	2	11		3	2	2			2			Furvela	1	0	1	0	0	0	0	1									hgb-68g
105	5	4	2004	1	22	2004-01-22	4	0	0.334028	4926	2	11		3	2	1	36.6	0				jogo	0	1	0	0	0	0	0	0
721	26	4	2004	1	24	2004-01-24	4	0	0.384722		3	1		3	2	1	36.5	0	2			Furvela	1	0	1	0	0	0	0	1
730	26	4	2004	1	24	2004-01-24	4	0	0.447222	5018	4			3	2	1			2			jogo	0	1	0	0	0	0	0	0			0	0
731	26	4	2004	1	24	2004-01-24	4	0	0.461111	5159	4	1		3	2	1			2			Furvela	0	1	0	0	0	0	0	0			0	0
4446	189	4	2007	1	22	2007-01-22	4	10:26:00	10:26:00	7378	2	10		3	2	2			3			jogo	0	1	0	0	0	0	0	0
4442	189	4	2007	1	22	2007-01-22	4	08:50:00	08:50:00	6280	4	8		3	2	2	36	0	3			Furvela	1	0	1	0	0	0	0	1
4453	189	4	2007	1	23	2007-01-23	4	10:00:00	10:00:00		2	4		3	2	2	39.6	1	3			Jogo	1	0	1	0	0	0	0	1			0	0
4452	189	4	2007	1	23	2007-01-23	4	09:38:00	09:38:00	6566	2	10		3	2	2	37.1	0	3			Jogo	1	0	1	0	0	0	0	1			0	0
4465	190	4	2007	1	24	2007-01-24	4	08:21:00	08:21:00	6961	2	6		3	2	2			3			jogo	0	1	0	0	0	0	0	0
4467	190	4	2007	1	24	2007-01-24	4	08:50:00	08:50:00	7356	2	2		3	2	2	37.9	1				Furvela	4	0	0	0	0	1	0	1			0	0
4476	190	4	2007	1	26	2007-01-26	4	08:16:00	08:16:00	7358	3			3	2	1	38	1				Furvela	4	0	0	0	0	1	0	1			0	0
3596	160	4	2008	1	21	2008-01-21	4	0	0.336806	7864	3	8		3	2	1	36.1	0	3			Furvela	2	0	0	1	0	0	0	1
3607	161	4	2008	1	21	2008-01-21	4	0	0.465972		2	6		3	2	1						Furvela	1	0	1	0	0	0	0	1
3613	161	4	2008	1	22	2008-01-22	4	0	0.392361	7542	2	9		3	2	1			3			Furvela	0	1	0	0	0	0	0	0			0	0
3610	161	4	2008	1	22	2008-01-22	4	0	0.336806	6591	3	1		3	2	1			3			Furvela	1	0	1	0	0	0	0	1
3612	161	4	2008	1	22	2008-01-22	4	0	0.382639	7763	4	2		3	2		35.9	0	3			Furvela	1	0	1	0	0	0	0	1
3614	161	4	2008	1	22	2008-01-22	4	0	0.397917	6825	2	8		3	2	2			3			Furvela	0	1	0	0	0	0	0	0
3617	161	4	2008	1	22	2008-01-22	4	0	0.447222	7775	2	2		3	2	2	37.6	1				Furvela	0	1	0	0	0	0	0	0
3624	161	4	2008	1	23	2008-01-23	4	0	0.352778	7835	4			3	2	2			3			jogo	1	0	1	0	0	0	0	1
3635	162	4	2008	1	23	2008-01-23	4	0	0.470833	6657	3	3		3	2	2			3			nharrumbo	0	1	0	0	0	0	0	0
3643	162	4	2008	1	24	2008-01-24	4	0	0.447222	7883	2	2		3	2	1			3			Furvela	0	1	0	0	0	0	0	0			0	0
3646	162	4	2008	1	24	2008-01-24	4	0	0.465972	6845	2	7		3	2	2			3			mahangue	0	1	0	0	0	0	0	0			0	0
3658	162	4	2008	1	25	2008-01-25	4	0	0.477778	7608	2	5		3	2	1	36.4	0	3			m`bene	4	0	0	0	0	1	0	1
3661	163	4	2008	1	25	2008-01-25	4	0	0.514583	7891	2	1		3	2	1			3			Furvela	1	0	1	0	0	0	0	1			0	0
112	5	4	2004	1	26	2004-01-26	5	0	0.338194	4928	3	4		3	2	2	37.5	1	2			jogo	0	1	0	0	0	0	0	0											r
113	5	4	2004	1	26	2004-01-26	5	0	0.334722		3	6		3	2	2	36.6	0	2			Furvela	0	1	0	0	0	0	0	0
125	5	4	2004	1	26	2004-01-26	5	0	0.376389	4935	4			3	2	2	36.7	0	2			jogo	0	1	0	0	0	0	0	0
326	12	4	2004	1	26	2004-01-26	5	0	0.502083	4944	2	9		3	2	2			2			Furvela	0	1	0	0	0	0	0	0
126	5	4	2004	1	26	2004-01-26	5	0	0.39375		2	11		3	2	2						Furvela	0	1	0	0	0	0	0	0
3	1	4	2004	1	27	2004-01-27	5	0	0.500694	4949	3			3	2	2			2			Furvela	1	0	1	0	0	0	0	1			0	0
330	12	4	2004	1	27	2004-01-27	5	0	0.336111		2	4		3	2	1			2			Jogo	0	1	0	0	0	0	0	0
339	12	4	2004	1	27	2004-01-27	5	0	0.429861	4845	3			3	2	1	38.9	1	2			Furvela	1	0	1	0	0	0	0	1
340	12	4	2004	1	27	2004-01-27	5	0	0.419444		3			3	2	1	37.1	0	9			Furvela	1	0	1	0	0	0	0	1
17	1	5	2004	1	28	2004-01-28	5	0	0.427778		3			3	2	1			2			jogo	0	1	0	0	0	0	0	0			0	0
90	4	5	2004	1	29	2004-01-29	5	0	0.442361	1964	2	8		3	2	1	37.1	0	2			Furvela	1	0	1	0	0	0	0	1
24	1	5	2004	1	29	2004-01-29	5	0	0.3375		3	4		3	2	2			2			Furvela	0	1	0	0	0	0	0	0
85	4	5	2004	1	29	2004-01-29	5	0	0.417361	2199	2	4		3	2	2			2			Furvela	0	1	0	0	0	0	0	0
57	3	5	2004	1	30	2004-01-30	5	0	0.365278	4969	3	8		3	2	1			2			Furvela	1	0	1	0	0	0	0	1
59	3	5	2004	1	30	2004-01-30	5	0	0.386111		3			3	2	2			2			jogo	0	1	0	0	0	0	0	0			0	0
76	3	5	2004	1	30	2004-01-30	5	0	0.482639	4977	4	7		3	2	2			2			matumbela	0	1	0	0	0	0	0	0								hospital
93	4	5	2004	1	30	2004-01-30	5	0	0.294444		3	1		3	2	2	39.6	1				Furvela	3	0	0	0	1	0	0	1
4483	190	5	2007	1	29	2007-01-29	5	09:47:00	09:47:00	7361	3	8		3	2	2	40	1				Furvela	3	0	0	0	1	0	0	1											resistente
4491	191	5	2007	1	30	2007-01-30	5	09:04:00	09:04:00	6686	2	2		3	2	2	36.4	0	3			Furvela	3	0	0	0	1	0	0	1			1
3676	163	5	2008	1	28	2008-01-28	5	11	11	6686	3	2		3	2	1			3			Furvela	4	0	0	0	0	1	0	1
3677	163	5	2008	1	28	2008-01-28	5	0	0.468056	6423	3	5		3	2	2			3			Furvela	4	0	0	0	0	1	0	1
3671	163	5	2008	1	28	2008-01-28	5	0	0.419444	7895	3			3	2	2	39.2	1	3			Furvela	4	0	0	0	0	1	0	1
3667	163	5	2008	1	28	2008-01-28	5	0	0.392361	7894	4	4		3	2	1						Furvela	0	1	0	0	0	0	0	0
3686	163	5	2008	1	29	2008-01-29	5	0	0.419444	6700	2	11		3	2	2	36.7	0	3			Furvela	4	0	0	0	0	1	0	1
3692	164	5	2008	1	29	2008-01-29	5	0	0.503472	7902	2	6		3	2	2	36.5	0	3			Furvela	0	1	0	0	0	0	0	0			0	0
3680	163	5	2008	1	29	2008-01-29	5	0	0.35625	6756	2	11		3	2	2	39	1	3			hospede de maputo	0	1	0	0	0	0	0	0
3693	164	5	2008	1	29	2008-01-29	5	0	0.5125	7775	2	2		3	2	1	35.6	0	3			Furvela	0	1	0	0	0	0	0	0
3682	163	5	2008	1	29	2008-01-29	5	0	0.394444	7437	3	8		3	2	2	36.8	0	3			Furvela	3	0	0	0	1	0	0	1			0	0
3683	163	5	2008	1	29	2008-01-29	5	0	0.396528	7898	2	8		3	2	1	35.6	0	3			Furvela	4	0	0	0	0	1	0	1
3689	163	5	2008	1	29	2008-01-29	5				2	3		3	2	1				control		jogo	1	0	1	0	0	0	0	1
3697	164	5	2008	1	30	2008-01-30	5	0	0.373611	7904	2	8		3	2	1			3			m´bene	2	0	0	1	0	0	0	1			0	0
3699	164	5	2008	1	30	2008-01-30	5	0	0.378472	6373	3	7		3	2	2	36.8	0	3			Furvela	1	0	1	0	0	0	0	1
3704	164	5	2008	1	30	2008-01-30	5	0	0.449306	7542	2	9		3	2	2			3			jogo	1	0	1	0	0	0	0	1
3696	164	5	2008	1	30	2008-01-30	5	0	0.336806	6932	3	4		3	2	2			3			Furvela	1	0	1	0	0	0	0	1								hospital
3701	164	5	2008	1	30	2008-01-30	5	10?	10?	7905	4	4		3	2	2	35.6	0	3			jogo	4	0	0	0	0	1	0	1
3700	164	5	2008	1	30	2008-01-30	5	0	0.413194	4800	4	3		3	2	2	35.8	0	3			jogo	2	0	0	1	0	0	0	1
3716	164	5	2008	1	31	2008-01-31	5	0	0.399306	7883	2	2		3	2	1			3			Furvela	1	0	1	0	0	0	0	1
521	19	5	2004	2	2	2004-02-02	6	0	0.427778	3167	2	3		3	2	2			2			Matumbela	0	1	0	0	0	0	0	0			0	0
1249	44	5	2004	2	2	2004-02-02	6	10	10	295	4			3	2	1	38.4	1	2			Furvela	0	1	0	0	0	0	0	0
1010	36	5	2004	2	3	2004-02-03	6	0	0.379861	4634	2	5		3	2	2			2			Furvela	3	0	0	0	1	0	0	1			0	0
1013	36	5	2004	2	3	2004-02-03	6	0	0.400694	1896	2	2		3	2	2			2			Furvela	0	1	0	0	0	0	0	0
1017	36	5	2004	2	3	2004-02-03	6	0	0.511806		2	10		3	2	2			2			Furvela	0	1	0	0	0	0	0	0			0	0
535	19	5	2004	2	3	2004-02-03	6	0	0.402083	114	4			3	2	1			2			Furvela	1	0	1	0	0	0	0	1
534	19	5	2004	2	3	2004-02-03	6	0	0.397917	4949	3			3	2	1						Furvela	3	0	0	0	1	0	0	1
497	18	6	2004	2	4	2004-02-04	6	0	0.361806	6006	3			3	2	1			2			Furvela	0	1	0	0	0	0	0	0
498	18	6	2004	2	4	2004-02-04	6	0	0.363889	23203	2	1		3	2	1			2			jogo	0	1	0	0	0	0	0	0
520	18	6	2004	2	4	2004-02-04	6	11	11	6014	4	7		3	2	1			2			xidanga	1	0	1	0	0	0	0	1
476	17	6	2004	2	5	2004-02-05	6	0	0.335417	6018	2	5		3	2	2			2			Furvela	0	1	0	0	0	0	0	0			0	0
483	17	6	2004	2	5	2004-02-05	6	0	0.392361	6019	2	4		3	2	2	36.9	0	2			Jogo	1	0	1	0	0	0	0	1								hospital
434	16	6	2004	2	5	2004-02-05	6	0	0.465972	4205	3			3	2	2			2			Furvela	0	1	0	0	0	0	0	0
489	17	6	2004	2	5	2004-02-05	6	0	0.424306	2364	2	3		3	2	2			2			Furvela	1	0	1	0	0	0	0	1
475	17	6	2004	2	5	2004-02-05	6	0	0.349306	1669	4	6		3	2	1			2			matumbela	3	0	0	0	1	0	0	1
492	17	6	2004	2	5	2004-02-05	6	0	0.441667	132	4			3	2	2			2			Furvela	0	1	0	0	0	0	0	0			0	0
441	16	6	2004	2	6	2004-02-06	6	0	0.331944	266	4			3	2	2	36.7	0	2			Furvela	0	1	0	0	0	0	0	0			0	0
410	15	6	2004	2	9	2004-02-09	7	0	0.404861	6031	2	6		3	2	1			2			Jogo	0	1	0	0	0	0	0	0			0	0
415	15	6	2004	2	9	2004-02-09	7	0	0.420833	6033	2	4		3	2	2			2			Jogo	0	1	0	0	0	0	0	0
459	16	6	2004	2	9	2004-02-09	7	0	0.350694	448	4			3	2	2	35.8	0	2			Inharumbo	0	1	0	0	0	0	0	0			0	0
462	16	6	2004	2	9	2004-02-09	7	0	0.336111	4693	4			3	2	1			2			Furvela	0	1	0	0	0	0	0	0
377	14	6	2004	2	10	2004-02-10	7	0	0.334722	6041	2	8		3	2	1	38	1	2			Furvela	1	0	1	0	0	0	0	1			0	0
386	14	6	2004	2	10	2004-02-10	7	0	0.377778	6046	3			3	2	2			2			Jogo	0	1	0	0	0	0	0	0
431	15	6	2004	2	10	2004-02-10	7	0	0.329861	6037	3			3	2	1			2			M´bene	1	0	1	0	0	0	0	1
389	14	6	2004	2	10	2004-02-10	7	0	0.424306	295	4			3	2	1						Furvela	0	1	0	0	0	0	0	0			0	0
347	13	7	2004	2	11	2004-02-11	7	0	0.391667		2	4		3	2	1			2			bovane	0	1	0	0	0	0	0	0			0	0
354	13	7	2004	2	11	2004-02-11	7	0	0.422222	6051	4	7		3	2	1	38.8	1	2			Furvela	2	0	0	1	0	0	0	1
364	13	7	2004	2	12	2004-02-12	7	0	0.357639		2	11		3	2	1			2			Furvela	3	0	0	0	1	0	0	1			0	0
373	13	7	2004	2	12	2004-02-12	7	0	0.378472	1973	3			3	2	2			2			Singa	1	0	1	0	0	0	0	1
374	13	7	2004	2	12	2004-02-12	7	10	10	5017	4			3	2	2			2			Furvela	0	1	0	0	0	0	0	0			0	0
361	13	7	2004	2	12	2004-02-12	7	0	0.332639	3319	3	7		3	2	2			2			Furvela	0	1	0	0	0	0	0	0			0	0
365	13	7	2004	2	12	2004-02-12	7	0	0.336111	3035	2	1		3	2	1						jogo	3	0	0	0	1	0	0	1
666	24	7	2004	2	12	2004-02-12	7	0	0.419444		2	1		3	2	1	36	0				Matumbela	0	1	0	0	0	0	0	0
683	24	7	2004	2	13	2004-02-13	7	0	0.442361	203	4			3	2	2			2			Furvela	0	1	0	0	0	0	0	0								hospital
676	24	7	2004	2	13	2004-02-13	7	0	0.358333	6059	2	1		3	2	1	37.6	1				Vala	1	0	1	0	0	0	0	1
678	24	7	2004	2	13	2004-02-13	7	0	0.377083	6006	3			3	2	1						Matumbela	0	1	0	0	0	0	0	0
3765	166	7	2008	2	11	2008-02-11	7	0	0.411111	7920	2	6		3	2	1			3			Matumbela	1	0	1	0	0	0	0	1			0	0
3767	166	7	2008	2	11	2008-02-11	7	0	0.500694	7921	2	6		3	2	1			3			Furvela	0	1	0	0	0	0	0	0
3761	166	7	2008	2	11	2008-02-11	7	9	9	6467	3	1		3	2	2	37	0				matumbela	0	1	0	0	0	0	0	0
3770	166	7	2008	2	12	2008-02-12	7	0	0.377083	7923	3	9		3	2	1	37	0	3			jogo	0	1	0	0	0	0	0	0
3779	166	7	2008	2	13	2008-02-13	7	0	0.484028	7904	2	9		3	2	2						matumbela	0	1	0	0	0	0	0	0
3783	166	7	2008	2	14	2008-02-14	7	0	0.508333		4			3	2	1	36.4	0	3			jogo	1	0	1	0	0	0	0	1
3781	166	7	2008	2	14	2008-02-14	7	0	0.473611	7244	2	11		3	2	1			3			Furvela	0	1	0	0	0	0	0	0
3846	169	7	2009	2	15	2009-02-15	7	0	0.336806	7488	3	3		3	2	1	36.6	0	4			nharrumbo	0	1	0	0	0	0	0	0			0	1
645	23	7	2004	2	16	2004-02-16	8	0	0.460417		2	2		3	2	2			2			Furvela	0	1	0	0	0	0	0	0
693	24	7	2004	2	16	2004-02-16	8	0	0.344444		2	5		3	2	1			2			Furvela	0	1	0	0	0	0	0	0			0	0	1			hospital
606	22	7	2004	2	17	2004-02-17	8	0	0.419444	6031	2	6		3	2	1	35.8	0	2			Jogo	4	0	0	0	0	1	0	1			0	0
654	23	7	2004	2	17	2004-02-17	8	0	0.363889	6075	2	6		3	2	1						Nhabundo 2	3	0	0	0	1	0	0	1
628	22	8	2004	2	18	2004-02-18	8	10	10	3760	2	4		3	2	1			2			Furvela	0	1	0	0	0	0	0	0
580	21	8	2004	2	18	2004-02-18	8	0	0.477778	6046	3			3	2	2						Matumbela	0	1	0	0	0	0	0	0			0	0
623	22	8	2004	2	18	2004-02-18	8	0	0.371528	448	4			3	2	2						Furvela	0	1	0	0	0	0	0	0
591	21	8	2004	2	19	2004-02-19	8	0	0.397917	4205	3			3	2	2						Furvela	0	1	0	0	0	0	0	0
566	20	8	2004	2	20	2004-02-20	8	0	0.434028	2123	2	8		3	2	2	35.7	0	2			Furvela	0	1	0	0	0	0	0	0			0	0				hospital
3862	169	8	2009	2	19	2009-02-19	8	0	0.465972	6817	2	5		3	2	1	36.7	0	4			Furvela	1	0	1	0	0	0	0	1			0	0	1
3868	169	8	2009	2	19	2009-02-19	8	12	12	7054	2	3		3	2	1	39.1	1	4			chiguelane	0	1	0	0	0	0	0	0
3854	169	8	2009	2	19	2009-02-19	8	0	0.336111	7168	3			3	2	1	37.1	0	4			Furvela	0	1	0	0	0	0	0	0			0	0
3872	169	8	2009	2	20	2009-02-20	8	0	0.377778	7938	4	5		3	2	1			4			jogo	1	0	1	0	0	0	0	1			0	0
3870	169	8	2009	2	20	2009-02-20	8	0	0.357639	7937	2	6		3	2	1	38.5	1				Furvela	4	0	0	0	0	1	0	1			0	0
3869	169	8	2009	2	20	2009-02-20	8	0	0.350694	5620	3	2		3	2	2	37.2	0				Furvela	4	0	0	0	0	1	0	1			0	0
711	25	8	2004	2	23	2004-02-23	9	0	0.456944		3			3	2	2			2			jogo	0	1	0	0	0	0	0	0						20	500
695	25	8	2004	2	23	2004-02-23	9	0	0.357639		2	11		3	2	1	36.6	0	2			Furvela	1	0	1	0	0	0	0	1
717	25	8	2004	2	24	2004-02-24	9	0	0.338889	2718	2	5		3	2	1			2			Jogo	1	0	1	0	0	0	0	1			0	0
1185	42	9	2004	2	25	2004-02-25	9	0	0.425694	778	4			3	2	2	36.8	0	2			matumbela	1	0	1	0	0	0	0	1
1181	42	9	2004	2	25	2004-02-25	9	0	0.390278	23109	2	3		3	2	2	38.2	1				Furvela	3	0	0	0	1	0	0	1
1188	42	9	2004	2	26	2004-02-26	9	0	0.315972	2	3	1		3	2	1			2			Furvela	0	1	0	0	0	0	0	0			0	0
1198	42	9	2004	2	26	2004-02-26	9	0	0.397222	267	3	4		3	2	2			2			Furvela	1	0	1	0	0	0	0	1			0	0
1224	43	9	2004	2	27	2004-02-27	9	0	0.427083	634	3	5		3	2	2			2			Bovane	1	0	1	0	0	0	0	1
1214	43	9	2004	2	27	2004-02-27	9	8	8	2106	2	9		3	2	1	39.9	1				Vala	4	0	0	0	0	1	0	1								hospital
5515	225	9	2008	2	29	2008-02-29	9	11:02:00	11:02:00	7437	3	9		3	2	2	37.8	1				Furvela	4	0	0	0	0	1	0	1
1038	37	9	2004	3	1	2004-03-01	10	0	0.336111		4			3	2				2			Furvela	0	1	0	0	0	0	0	0
1045	37	9	2004	3	1	2004-03-01	10	0	0.391667	6130	3			3	2	2			2			Jogo	0	1	0	0	0	0	0	0
1052	37	9	2004	3	1	2004-03-01	10	0	0.434028	266	4			3	2	2	35.9	0	2			Furvela	1	0	1	0	0	0	0	1
1058	37	9	2004	3	1	2004-03-01	10	0	0.454861	44	4			3	2	1			2			Furvela	0	1	0	0	0	0	0	0
1043	37	9	2004	3	1	2004-03-01	10	0	0.386111		3	4		3	2	2	35.7	0				Furvela	3	0	0	0	1	0	0	1
1009	36	9	2004	3	3	2004-03-03	10	0	0.294444		4			3	2	1						Furvela	4	0	0	0	0	1	0	1			0	0
1021	36	10	2004	3	4	2004-03-04	10	0	0.331944	6141	2	11		3	2	1			2			Matumbela	1	0	1	0	0	0	0	1			0	0
1022	36	10	2004	3	4	2004-03-04	10	8	8	6142	4	7		3	2	1			2			Furvela	1	0	1	0	0	0	0	1
982	35	10	2004	3	4	2004-03-04	10	11	11	342	4			3	2	2	37.6	1				Furvela	4	0	0	0	0	1	0	1
990	35	10	2004	3	5	2004-03-05	10	0	0.434028		2	2		3	2	1			2			Furvela	0	1	0	0	0	0	0	0
985	35	10	2004	3	5	2004-03-05	10	0	0.384722		3			3	2	2			2			matumbela	0	1	0	0	0	0	0	0			0	0
986	35	10	2004	3	5	2004-03-05	10	0	0.377778	96	3	5		3	2	2			2			matumbela	0	1	0	0	0	0	0	0			0	0
991	35	10	2004	3	5	2004-03-05	10	0	0.41875		4			3	2	2			2			Furvela	0	1	0	0	0	0	0	0
993	35	10	2004	3	5	2004-03-05	10	0	0.446528	1741	4			3	2	2			2			Furvela	0	1	0	0	0	0	0	0
989	35	10	2004	3	5	2004-03-05	10	0	0.428472	4937	2	1		3	2	2			2			Furvela	0	1	0	0	0	0	0	0
[truncated: 3,785 more rows]

## Sheet: weekly means
week	Negative	f1	f2	f3	f4	f5	falciparum pos			Week number	falciparum	Negative	f1	f2	f3	f4	f5	falciparum pos	Negative	f1	f2	f3	f4	f5	falciparum pos	Negative	f1	f2	f3	f4	f5	falciparum pos			Week number	Negative	f1	f2	f3	f4	f5	falciparum pos	cases	positive	ovale	malariae	gametocytes
1	0.585366	0.195122	0.0731707	0.146341	0	0	0.414634			1 Average		0.5	0.2	0.1	0.2	0	0	0.5	0.5	0.142857	0.142857	0.214286	0	0	0.5	0.636364	0.363636	0	0	0	0	0.363636			1 Total	5	2	1	2	0	0	5	10	0.5	0	0	0
2	0.458937	0.280193	0.0386473	0.135266	0.057971	0.0289855	0.541063			2 Average		0.327273	0.181818	0.0545455	0.218182	0.145455	0.0727273	0.672727	0.462687	0.268657	0.0447761	0.149254	0.0447761	0.0298507	0.537313	0.538462	0.353846	0.0307692	0.0615385	0.0153846	0	0.461538			2 Total	18	10	3	12	8	4	37	55	0.672727	0	0	0
3	0.431034	0.25431	0.0517241	0.125	0.0646552	0.0646552	0.564655			3 Average		0.253521	0.253521	0	0.169014	0.169014	0.15493	0.746479	0.36	0.2	0.133333	0.186667	0.04	0.0533333	0.626667	0.54	0.38	0.02	0.06	0	0	0.46			3 Total	18	18	0	12	12	11	53	71	0.746479	0	0	0
4	0.411765	0.181818	0.0695187	0.171123	0.101604	0.0588235	0.582888			4 Average		0.314286	0.1	0.0285714	0.3	0.185714	0.0714286	0.685714	0.321429	0.160714	0.125	0.196429	0.0892857	0.107143	0.678571	0.578947	0.368421	0.0526316	0	0	0	0.421053			4 Total	22	7	2	21	13	5	48	70	0.685714	0	0	3
5	0.423645	0.221675	0.0689655	0.152709	0.0837438	0.0344828	0.55665			5 Average		0.298246	0.122807	0.0877193	0.245614	0.157895	0.0877193	0.701754	0.390625	0.21875	0.09375	0.15625	0.09375	0.03125	0.578125	0.535714	0.267857	0.0535714	0.0892857	0.0178571	0	0.428571			5 Total	17	7	5	14	9	5	40	57	0.701754	0	3	0
6	0.390411	0.308219	0.0136986	0.184932	0.0616438	0.0342466	0.60274			6 Average		0.214286	0.238095	0.047619	0.238095	0.190476	0.0714286	0.785714	0.305556	0.333333	0	0.277778	0.0277778	0.0555556	0.694444	0.509434	0.339623	0	0.132075	0	0	0.471698			6 Total	9	10	2	10	8	3	33	42	0.785714	0	0	0
7	0.438849	0.251799	0.0215827	0.129496	0.0791367	0.0791367	0.561151			7 Average		0.277778	0.166667	0.0185185	0.203704	0.166667	0.166667	0.722222	0.463415	0.268293	0.0487805	0.146341	0.0243902	0.0487805	0.536585	0.611111	0.333333	0	0.0277778	0.0277778	0	0.388889			7 Total	15	9	1	11	9	9	39	54	0.722222	0	1	0
8	0.417323	0.259843	0	0.149606	0.141732	0.0314961	0.582677			8 Average		0.225	0.275	0	0.15	0.25	0.1	0.775	0.357143	0.25	0	0.25	0.142857	0	0.642857	0.627451	0.254902	0	0.0784314	0.0392157	0	0.372549			8 Total	9	11	0	6	10	4	31	40	0.775	1	0	0
9	0.37037	0.240741	0.0185185	0.138889	0.185185	0.037037	0.62037			9 Average		0.351351	0.162162	0	0.189189	0.27027	0.027027	0.648649	0.225	0.3	0.025	0.15	0.2	0.075	0.75	0.55	0.3	0	0.05	0.1	0	0.45			9 Total	13	6	0	7	10	1	24	37	0.648649	1	0	0
10	0.380597	0.30597	0.0298507	0.171642	0.0970149	0.0149254	0.619403			10 Average		0.346939	0.102041	0.0204082	0.285714	0.204082	0.0408163	0.653061	0.411765	0.372549	0.0392157	0.117647	0.0588235	0	0.588235	0.32	0.56	0.04	0.08	0	0	0.68			10 Total	17	5	1	14	10	2	32	49	0.653061	1	0	0
11	0.464	0.224	0.048	0.128	0.056	0.072	0.536			11 Average		0.424242	0.151515	0.030303	0.181818	0.0606061	0.151515	0.575758	0.295455	0.181818	0.0909091	0.204545	0.113636	0.0909091	0.704545	0.586207	0.344828	0.0344828	0.0344828	0	0	0.413793			11 Total	14	5	1	6	2	5	19	33	0.575758	0	0	0
12	0.464646	0.262626	0.010101	0.111111	0.10101	0.040404	0.535354			12 Average		0.25	0.25	0.0357143	0.25	0.107143	0.107143	0.75	0.392857	0.285714	0	0.0714286	0.214286	0.0357143	0.607143	0.586207	0.310345	0	0.0689655	0	0	0.413793			12 Total	7	7	1	7	3	3	21	28	0.75	3	7	0
13	0.385542	0.253012	0.0240964	0.144578	0.156627	0.0120482	0.614458			13 Average		0.26087	0.173913	0	0.26087	0.26087	0.0434783	0.73913	0.2	0.28	0.04	0.2	0.24	0	0.8	0.636364	0.318182	0	0	0	0	0.363636			13 Total	6	4	0	6	6	1	17	23	0.73913	0	3	0
14	0.5	0.20339	0	0.127119	0.0932203	0.0677966	0.491525			14 Average		0.311111	0.155556	0	0.222222	0.2	0.111111	0.688889	0.551724	0.172414	0	0.137931	0.0689655	0.0689655	0.448276	0.592593	0.333333	0	0.037037	0	0	0.37037			14 Total	14	7	0	10	9	5	31	45	0.688889	0	0	0
15	0.542683	0.134146	0.00609756	0.121951	0.103659	0.054878	0.420732			15 Average		0.3	0.08	0	0.18	0.24	0.14	0.64	0.547619	0.119048	0	0.166667	0.119048	0.047619	0.452381	0.666667	0.214286	0.0238095	0.0714286	0	0	0.309524			15 Total	15	4	0	9	12	7	32	47	0.680851	1	5	0
16	0.457364	0.116279	0.0387597	0.155039	0.139535	0.0387597	0.496124			16 Average		0.166667	0.0952381	0.0238095	0.309524	0.238095	0.119048	0.809524	0.439024	0.121951	0.097561	0.121951	0.170732	0	0.512195	0.6875	0.1875	0	0.0625	0.03125	0	0.28125			16 Total	7	4	1	13	10	5	34	41	0.829268	2	1	1
17	0.431193	0.146789	0.0275229	0.229358	0.0642202	0.0733945	0.550459			17 Average		0.222222	0.037037	0.0740741	0.333333	0.148148	0.148148	0.777778	0.290323	0.193548	0.0322581	0.290323	0.0645161	0.129032	0.709677	0.548387	0.193548	0	0.193548	0	0	0.387097			17 Total	6	1	2	9	4	4	21	27	0.777778	0	3	0
18	0.473958	0.182292	0.0364583	0.130208	0.109375	0.0572917	0.520833			18 Average		0.264151	0.0943396	0.0754717	0.226415	0.207547	0.113208	0.735849	0.37931	0.206897	0.0517241	0.155172	0.155172	0.0517241	0.62069	0.644068	0.237288	0	0.0677966	0.0169492	0.0169492	0.338983			18 Total	14	5	4	12	11	6	39	53	0.735849	0	3	0
19	0.449198	0.165775	0.0320856	0.213904	0.0534759	0.0588235	0.534759			19 Average		0.245283	0.132075	0.0188679	0.377358	0.0754717	0.132075	0.754717	0.360656	0.163934	0.0655738	0.278689	0.0819672	0.0491803	0.639344	0.636364	0.218182	0.0181818	0.0363636	0.0181818	0	0.309091			19 Total	13	7	1	20	4	7	40	53	0.754717	3	0	0
20	0.445087	0.17341	0.0404624	0.132948	0.0924855	0.0924855	0.543353			20 Average		0.378788	0.106061	0.0454545	0.151515	0.136364	0.151515	0.606061	0.326923	0.192308	0.0769231	0.173077	0.0961538	0.115385	0.653846	0.589744	0.282051	0	0.0512821	0.0512821	0	0.410256			20 Total	25	7	3	10	9	10	40	65	0.615385	1	1	0
21	0.460526	0.210526	0.0394737	0.131579	0.0986842	0.0394737	0.526316			21 Average		0.270833	0.1875	0.0208333	0.208333	0.208333	0.0625	0.708333	0.413043	0.195652	0.108696	0.130435	0.0869565	0.0652174	0.586957	0.666667	0.242424	0	0.0909091	0	0	0.333333			21 Total	13	9	1	10	10	3	34	47	0.723404	0	6	0
22	0.495798	0.168067	0.0168067	0.117647	0.109244	0.0672269	0.478992			22 Average		0.28125	0.125	0	0.28125	0.15625	0.15625	0.71875	0.387097	0.193548	0.0322581	0.0967742	0.16129	0.0967742	0.580645	0.645161	0.193548	0.0322581	0	0.0967742	0	0.322581			22 Total	9	4	0	9	5	5	23	32	0.71875	0	0	1
23	0.516854	0.157303	0	0.224719	0.0898876	0.011236	0.483146			23 Average		0.259259	0.148148	0	0.37037	0.185185	0.037037	0.740741	0.583333	0.166667	0	0.208333	0.0416667	0	0.416667	0.565217	0.217391	0	0.173913	0.0434783	0	0.434783			23 Total	7	4	0	10	5	1	20	27	0.740741	1	3	0
24	0.490385	0.144231	0	0.201923	0.134615	0.0288462	0.509615			24 Average		0.285714	0.0857143	0	0.314286	0.285714	0.0285714	0.714286	0.461538	0.0769231	0	0.230769	0.153846	0.0769231	0.538462	0.714286	0.214286	0	0.0714286	0	0	0.285714			24 Total	10	3	0	11	10	1	25	35	0.714286	3	0	1
25	0.5	0.175	0.025	0.1375	0.1	0.05	0.4875			25 Average		0.269231	0.115385	0	0.192308	0.269231	0.153846	0.730769	0.421053	0.105263	0.0526316	0.315789	0.0526316	0	0.526316	0.615385	0.346154	0.0384615	0	0	0	0.384615			25 Total	7	3	0	5	7	4	19	26	0.730769	0	3	0
26	0.421875	0.203125	0.03125	0.125	0.109375	0.046875	0.546875			26 Average		0.285714	0.190476	0.047619	0.142857	0.238095	0.0952381	0.714286	0.461538	0.115385	0.0384615	0.192308	0.0769231	0.0384615	0.5	0.8	0.1	0	0	0	0	0.2			26 Total	6	4	1	3	5	2	15	21	0.714286	0	1	0
27	0.464286	0.190476	0.0654762	0.119048	0.0833333	0.0654762	0.529762			27 Average		0.304348	0.108696	0.0434783	0.26087	0.173913	0.108696	0.695652	0.411765	0.137255	0.0980392	0.117647	0.117647	0.117647	0.588235	0.541667	0.354167	0.0416667	0.0416667	0	0	0.4375			27 Total	14	5	2	12	8	5	32	46	0.695652	0	1	1
28	0.448052	0.233766	0.0454545	0.0974026	0.142857	0.012987	0.538961			28 Average		0.325	0.075	0.025	0.2	0.325	0.05	0.675	0.319149	0.297872	0.106383	0.106383	0.148936	0	0.659574	0.6	0.32	0.02	0.02	0.02	0	0.4			28 Total	13	3	1	8	13	2	27	40	0.675	0	0	0
29	0.473684	0.144737	0.0460526	0.125	0.131579	0.0723684	0.526316			29 Average		0.276596	0.0638298	0.0212766	0.212766	0.212766	0.212766	0.723404	0.428571	0.160714	0.0714286	0.142857	0.178571	0.0178571	0.571429	0.675	0.25	0.05	0	0	0	0.325			29 Total	13	3	1	10	10	10	34	47	0.723404	1	0	0
30	0.387097	0.212903	0.0387097	0.193548	0.116129	0.0451613	0.612903			30 Average		0.148936	0.148936	0.0212766	0.361702	0.234043	0.0638298	0.851064	0.361702	0.212766	0.0425532	0.212766	0.0851064	0.0851064	0.638298	0.581395	0.255814	0.0697674	0.0697674	0.0232558	0	0.418605			30 Total	7	7	1	17	11	3	40	47	0.851064	1	0	0
31	0.513043	0.226087	0.0173913	0.121739	0.113043	0	0.486957			31 Average		0.464286	0.142857	0.0357143	0.142857	0.214286	0	0.535714	0.296296	0.185185	0.037037	0.296296	0.185185	0	0.703704	0.526316	0.368421	0	0.0263158	0.0526316	0	0.473684			31 Total	13	4	1	4	6	0	15	28	0.535714	0	0	0
32	0.44697	0.234848	0.0378788	0.166667	0.0757576	0.030303	0.545455			32 Average		0.424242	0.121212	0	0.212121	0.151515	0.0909091	0.575758	0.403846	0.25	0.0576923	0.153846	0.0961538	0.0192308	0.576923	0.485714	0.342857	0.0285714	0.142857	0	0	0.514286			32 Total	14	4	0	7	5	3	19	33	0.575758	0	0	0
33	0.5	0.204082	0.0408163	0.153061	0.0816327	0.0204082	0.5			33 Average		0.285714	0.178571	0	0.357143	0.142857	0.0357143	0.714286	0.413793	0.137931	0.137931	0.172414	0.103448	0.0344828	0.586207	0.692308	0.269231	0	0	0.0384615	0	0.307692			33 Total	8	5	0	10	4	1	20	28	0.714286	0	3	0
34	0.459016	0.213115	0	0.180328	0.0819672	0.0491803	0.52459			34 Average		0.333333	0.166667	0	0.277778	0.111111	0.111111	0.666667	0.333333	0.238095	0	0.238095	0.142857	0.047619	0.666667	0.764706	0.176471	0	0	0	0	0.176471			34 Total	6	3	0	5	2	2	12	18	0.666667	0	0	0
35	0.453125	0.203125	0.015625	0.1875	0.09375	0.046875	0.546875			35 Average		0.190476	0.0952381	0	0.333333	0.285714	0.0952381	0.809524	0.529412	0.235294	0	0.176471	0	0.0588235	0.470588	0.578947	0.315789	0.0526316	0.0526316	0	0	0.421053			35 Total	4	2	0	7	6	2	17	21	0.809524	0	0	0
36	0.418182	0.254545	0	0.181818	0.109091	0.0181818	0.563636			36 Average		0.235294	0.176471	0	0.352941	0.235294	0	0.764706	0.5	0.277778	0	0.111111	0.0555556	0.0555556	0.5	0.363636	0.363636	0	0.181818	0	0	0.545455			36 Total	4	3	0	6	4	0	13	17	0.764706	0	0	0
37	0.541353	0.135338	0.0225564	0.195489	0.075188	0.0225564	0.451128			37 Average		0.44	0.08	0	0.28	0.12	0.06	0.54	0.472222	0.138889	0.0555556	0.25	0.0833333	0	0.527778	0.666667	0.242424	0.030303	0.0606061	0	0	0.333333			37 Total	22	4	0	14	6	3	27	49	0.55102	3	0	0
38	0.472441	0.204724	0.015748	0.133858	0.11811	0.0472441	0.519685			38 Average		0.342105	0.0789474	0	0.263158	0.184211	0.105263	0.631579	0.378378	0.27027	0.0540541	0.135135	0.108108	0.0540541	0.621622	0.658537	0.243902	0	0	0.097561	0	0.341463			38 Total	13	3	0	10	7	4	24	37	0.648649	1	5	1
39	0.465517	0.198276	0.0603448	0.172414	0.0775862	0.0258621	0.534483			39 Average		0.354839	0.129032	0.0967742	0.258065	0.129032	0.0322581	0.645161	0.333333	0.214286	0.0714286	0.214286	0.119048	0.047619	0.666667	0.617647	0.294118	0	0.0882353	0	0	0.382353			39 Total	11	4	3	8	4	1	20	31	0.645161	0	0	0
40	0.527778	0.222222	0	0.166667	0.0833333	0	0.472222			40 Average		0.428571	0.142857	0	0.285714	0.142857	0	0.571429	0.375	0.25	0	0.25	0.125	0	0.625	0.875	0.125	0	0	0	0	0.125			40 Total	6	2	0	4	2	0	8	14	0.571429	0	0	0
41	0.571429	0.178571	0.0357143	0.0714286	0.0714286	0.0714286	0.428571			41 Average		0.333333	0.333333	0	0.0833333	0.166667	0.0833333	0.666667	0.714286	0.142857	0	0	0	0.142857	0.285714	0.75	0	0	0.25	0	0	0.25			41 Total	4	4	0	1	2	1	8	12	0.666667	0	0	0
42	0.5	0.115385	0	0.153846	0.192308	0.0384615	0.5			42 Average		0.230769	0.153846	0	0.230769	0.307692	0.0769231	0.769231	0.714286	0	0	0.142857	0.142857	0	0.285714	0.8	0.2	0	0	0	0	0.2			42 Total	3	2	0	3	4	1	10	13	0.769231	0	0	0
43	0.65	0.25	0	0.05	0.05	0	0.35			43 Average		0.7	0.2	0	0	0.1	0	0.3	0.5	0.5	0	0	0	0	0.5	1	0	0	0	0	0	0			43 Total	7	2	0	0	1	0	3	10	0.3	0	0	0
44	0.666667	0.0833333	0	0.166667	0.0416667	0.0416667	0.333333			44 Average		0.5	0	0	0.375	0	0.125	0.5	0.666667	0	0	0.166667	0.166667	0	0.333333	0.875	0.125	0	0	0	0	0.125			44 Total	4	0	0	3	0	1	4	8	0.5	0	0	0
45	0.611111	0.111111	0.0555556	0.12963	0.0740741	0	0.388889			45 Average		0.636364	0.136364	0.0454545	0.136364	0.0454545	0	0.363636	0.5	0.0555556	0.111111	0.166667	0.111111	0	0.5	0.5	0.25	0	0.125	0.125	0	0.5			45 Total	14	3	1	3	1	0	8	22	0.363636	0	0	0
46	0.490909	0.236364	0.0545455	0.109091	0.0818182	0	0.5			46 Average		0.481481	0.185185	0.037037	0.111111	0.185185	0	0.518519	0.490909	0.181818	0.0909091	0.127273	0.0727273	0	0.509091	0.44	0.44	0	0.08	0	0	0.52			46 Total	13	5	1	3	5	0	14	27	0.518519	0	0	0
47	0.425532	0.244681	0.0744681	0.148936	0.0425532	0.0531915	0.574468			47 Average		0.34375	0.21875	0.09375	0.1875	0.09375	0.0625	0.65625	0.425	0.2	0.1	0.175	0.025	0.05	0.575	0.555556	0.388889	0	0	0	0.0555556	0.444444			47 Total	11	7	3	6	3	2	21	32	0.65625	0	0	0
48	0.432099	0.209877	0.0246914	0.111111	0.111111	0.0740741	0.555556			48 Average		0.4375	0	0.03125	0.21875	0.125	0.15625	0.53125	0.354839	0.387097	0.0322581	0.0322581	0.129032	0.0322581	0.645161	0.533333	0.266667	0	0.0666667	0.0666667	0	0.466667			48 Total	14	0	1	7	4	5	17	31	0.548387	0	1	0
49	0.613636	0.181818	0.0454545	0.113636	0.0227273	0.0227273	0.386364			49 Average		0.272727	0.181818	0.0909091	0.272727	0.0909091	0.0909091	0.727273	0.631579	0.263158	0.0526316	0.0526316	0	0	0.368421	0.909091	0.0909091	0	0	0	0	0.0909091			49 Total	3	2	1	3	1	1	8	11	0.727273	0	0	0
50	0.422535	0.211268	0.0704225	0.225352	0.0422535	0.0140845	0.577465			50 Average		0.2	0.1	0.05	0.45	0.1	0.05	0.8	0.392857	0.25	0.107143	0.214286	0.0357143	0	0.607143	0.647059	0.294118	0	0.0588235	0	0	0.352941			50 Total	4	2	1	9	2	1	16	20	0.8	0	0	0
51	0.397059	0.279412	0.102941	0.0588235	0.132353	0.0294118	0.602941			51 Average		0.230769	0.153846	0.230769	0.0769231	0.230769	0.0769231	0.769231	0.3	0.266667	0.133333	0.1	0.2	0	0.7	0.5	0.5	0	0	0	0	0.5			51 Total	3	2	3	1	3	1	10	13	0.769231	0	0	0
average	0.458838	0.207829	0.0349307	0.148148	0.0940846	0.0433562	0.532912			1 Average																									1 Total	7	2	2	3	0	0	7	14	0.5	3	0	0
										2 Average																									2 Total	31	18	3	10	3	2	36	67	0.537313	0	0	0
										3 Average																									3 Total	27	15	10	14	3	4	47	74	0.635135	0	3	0
										4 Average																									4 Total	18	9	7	11	5	6	38	56	0.678571	3	0	0
										5 Average																									5 Total	25	14	6	10	6	2	37	62	0.596774	0	1	0
										6 Average																									6 Total	11	12	0	10	1	2	25	36	0.694444	0	4	0
										7 Average																									7 Total	19	11	2	6	1	2	22	41	0.536585	0	0	0
										8 Average																									8 Total	10	7	0	7	4	0	18	28	0.642857	0	0	0
										9 Average																									9 Total	9	12	1	6	8	3	30	39	0.769231	0	2	0
										10 Average																									10 Total	21	19	2	6	3	0	30	51	0.588235	0	0	0
										11 Average																									11 Total	13	8	4	9	5	4	31	44	0.704545	0	0	0
										12 Average																									12 Total	11	8	0	2	6	1	17	28	0.607143	0	0	0
										13 Average																									13 Total	5	7	1	5	6	0	20	25	0.8	1	0	0
										14 Average																									14 Total	16	5	0	4	2	2	13	29	0.448276	0	0	1
										15 Average																									15 Total	23	5	0	7	5	2	19	42	0.452381	3	0	0
										16 Average																									16 Total	18	5	4	5	7	0	21	39	0.538462	2	3	3
										17 Average																									17 Total	9	6	1	9	2	4	22	31	0.709677	0	1	0
										18 Average																									18 Total	22	12	3	9	9	3	36	58	0.62069	1	3	3
										19 Average																									19 Total	22	10	4	17	5	3	39	61	0.639344	0	0	0
										20 Average																									20 Total	17	10	4	9	5	6	34	51	0.666667	4	3	0
										21 Average																									21 Total	19	9	5	6	4	3	27	46	0.586957	0	0	0
										22 Average																									22 Total	12	6	1	3	5	3	18	30	0.6	1	1	1
										23 Average																									23 Total	14	4	0	5	1	0	10	24	0.416667	0	3	0
										24 Average																									24 Total	12	2	0	6	4	2	14	26	0.538462	0	0	0
										25 Average																									25 Total	8	2	1	6	1	0	10	18	0.555556	3	3	3
										26 Average																									26 Total	12	3	1	5	2	1	13	25	0.52	1	0	0
										27 Average																									27 Total	21	7	5	6	6	6	30	51	0.588235	0	0	1
										28 Average																									28 Total	15	14	5	5	7	0	31	46	0.673913	4	1	0
										29 Average																									29 Total	24	9	4	8	10	1	32	56	0.571429	0	0	0
										30 Average																									30 Total	17	10	2	10	4	4	30	47	0.638298	0	1	0
										31 Average																									31 Total	8	5	1	8	5	0	19	27	0.703704	0	0	0
										32 Average																									32 Total	21	13	3	8	5	1	30	51	0.588235	0	3	1
										33 Average																									33 Total	12	4	4	5	3	1	17	29	0.586207	0	0	0
										34 Average																									34 Total	7	5	0	5	3	1	14	21	0.666667	0	0	0
										35 Average																									35 Total	9	4	0	3	0	1	8	17	0.470588	0	0	0
										36 Average																									36 Total	9	5	0	2	1	1	9	18	0.5	0	0	0
										37 Average																									37 Total	17	5	2	9	3	0	19	36	0.527778	0	0	0
										38 Average																									38 Total	14	10	2	5	4	2	23	37	0.621622	0	0	0
										39 Average																									39 Total	14	9	3	9	5	2	28	42	0.666667	0	0	0
										40 Average																									40 Total	3	2	0	2	1	0	5	8	0.625	0	0	0
										41 Average																									41 Total	5	1	0	0	0	1	2	7	0.285714	0	0	0
										42 Average																									42 Total	5	0	0	1	1	0	2	7	0.285714	0	0	0
										43 Average																									43 Total	2	2	0	0	0	0	2	4	0.5	0	0	0
										44 Average																									44 Total	4	0	0	1	1	0	2	6	0.333333	0	0	0
										45 Average																									45 Total	9	1	2	3	2	0	9	18	0.5	0	0	0
										46 Average																									46 Total	27	10	5	7	4	0	28	55	0.509091	0	0	0
										47 Average																									47 Total	17	8	4	7	1	2	23	40	0.575	0	0	0
										48 Average																									48 Total	11	12	1	1	4	1	20	31	0.645161	0	0	0
										49 Average																									49 Total	12	5	1	1	0	0	7	19	0.368421	0	0	0
										50 Average																									50 Total	11	7	3	6	1	0	17	28	0.607143	1	0	0
										51 Average																									51 Total	9	8	4	3	6	0	21	30	0.7	0	0	0
										1 Average																									1 Total	7	4	0	0	0	0	4	11	0.363636	0	0	0
										2 Average																									2 Total	35	23	2	4	1	0	30	65	0.461538	0	0	0
										3 Average																									3 Total	27	19	1	3	0	0	23	50	0.46	0	0	1
										4 Average																									4 Total	22	14	2	0	0	0	16	38	0.421053	0	0	1
										5 Average																									5 Total	30	15	3	5	1	0	24	54	0.444444	4	0	0
										6 Average																									6 Total	27	18	0	7	0	0	25	52	0.480769	0	1	1
										7 Average																									7 Total	22	12	0	1	1	0	14	36	0.388889	0	0	0
										8 Average																									8 Total	32	13	0	4	2	0	19	51	0.372549	0	4	0
										9 Average																									9 Total	11	6	0	1	2	0	9	20	0.45	0	0	0
										10 Average																									10 Total	8	14	1	2	0	0	17	25	0.68	0	0	0
										11 Average																									11 Total	17	10	1	1	0	0	12	29	0.413793	0	0	0
										12 Average																									12 Total	17	9	0	2	0	0	12	29	0.413793	0	0	1
										13 Average																									13 Total	14	7	0	0	0	0	8	22	0.363636	0	0	0
										14 Average																									14 Total	16	9	0	1	0	0	10	26	0.384615	0	4	2
										15 Average																									15 Total	28	9	1	3	0	0	13	41	0.317073	1	0	0
										16 Average																									16 Total	22	6	0	2	1	0	9	31	0.290323	1	1	3
										17 Average																									17 Total	17	6	0	6	0	0	12	29	0.413793	2	0	0
										18 Average																									18 Total	38	14	0	4	1	1	20	58	0.344828	1	0	1
										19 Average																									19 Total	35	12	1	2	1	0	17	52	0.326923	2	1	0
										20 Average																									20 Total	23	11	0	2	2	0	16	39	0.410256	1	0	0
										21 Average																									21 Total	22	8	0	3	0	0	11	33	0.333333	0	0	1
										22 Average																									22 Total	20	6	1	0	3	0	10	30	0.333333	1	0	0
										23 Average																									23 Total	13	5	0	4	1	0	10	23	0.434783	1	0	0
										24 Average																									24 Total	20	6	0	2	0	0	8	28	0.285714	0	0	0
										25 Average																									25 Total	16	9	1	0	0	0	10	26	0.384615	0	0	0
										26 Average																									26 Total	8	1	0	0	0	0	2	10	0.2	0	0	1
										27 Average																									27 Total	26	17	2	2	0	0	21	47	0.446809	1	0	0
										28 Average																									28 Total	30	16	1	1	1	0	20	50	0.4	0	0	1
										29 Average																									29 Total	27	10	2	0	0	0	13	40	0.325	0	0	0
										30 Average																									30 Total	25	11	3	3	1	0	18	43	0.418605	0	0	0
										31 Average																									31 Total	20	14	0	1	2	0	18	38	0.473684	0	0	1
										32 Average																									32 Total	17	12	1	5	0	0	18	35	0.514286	0	0	0
										33 Average																									33 Total	18	7	0	0	1	0	8	26	0.307692	0	0	0
										34 Average																									34 Total	13	3	0	0	0	0	3	16	0.1875	0	3	1
										35 Average																									35 Total	11	6	1	1	0	0	8	19	0.421053	0	0	0
										36 Average																									36 Total	4	4	0	2	0	0	6	10	0.6	0	1	0
										37 Average																									37 Total	22	8	1	2	0	0	11	33	0.333333	0	0	1
										38 Average																									38 Total	27	10	0	0	4	0	14	41	0.341463	0	0	0
										39 Average																									39 Total	21	10	0	3	0	0	13	34	0.382353	0	0	0
										40 Average																									40 Total	7	1	0	0	0	0	1	8	0.125	0	0	0
										41 Average																									41 Total	3	0	0	1	0	0	1	4	0.25	0	0	0
										42 Average																									42 Total	4	1	0	0	0	0	1	5	0.2	0	0	0
										43 Average																									43 Total	2	0	0	0	0	0	0	2	0	0	0	0
										44 Average																									44 Total	7	1	0	0	0	0	1	8	0.125	0	0	0
										45 Average																									45 Total	4	2	0	1	1	0	4	8	0.5	0	0	0
										46 Average																									46 Total	11	11	0	2	0	0	13	24	0.541667	0	1	0
										47 Average																									47 Total	10	7	0	0	0	1	8	18	0.444444	0	0	0
										48 Average																									48 Total	8	4	0	1	1	0	7	15	0.466667	0	0	0
										49 Average																									49 Total	10	1	0	0	0	0	1	11	0.0909091	0	0	0
										50 Average																									50 Total	11	5	0	1	0	0	6	17	0.352941	0	0	0
										51 Average																									51 Total	8	8	0	0	0	0	8	16	0.5	0	0	0
										1 Average		1	0	0	0	0	0	0																	1 Total	3	0	0	0	0	0	0	3	0	0	0	0
										2 Average		0.647059	0.294118	0	0.0588235	0	0	0.352941																	2 Total	11	5	0	1	0	0	6	17	0.352941	0	0	0
										3 Average		0.771429	0.2	0.0285714	0	0	0	0.228571																	3 Total	27	7	1	0	0	0	8	35	0.228571	0	0	0
										4 Average		0.769231	0.0769231	0.0769231	0	0	0	0.153846																	4 Total	10	1	1	0	0	0	2	12	0.166667	0	1	0
										5 Average		0.52381	0.380952	0	0.0952381	0	0	0.47619																	5 Total	11	8	0	2	0	0	10	21	0.47619	0	0	0
										6 Average		0.714286	0.285714	0	0	0	0	0.285714																	6 Total	10	4	0	0	0	0	4	14	0.285714	0	0	0
										7 Average		0.714286	0.285714	0	0	0	0	0.285714																	7 Total	5	2	0	0	0	0	2	7	0.285714	0	0	0
										8 Average		0.285714	0.142857	0	0.285714	0.285714	0	0.714286																	8 Total	2	1	0	2	2	0	5	7	0.714286	0	0	0
										9 Average		0.555556	0.222222	0.111111	0.111111	0	0	0.444444																	9 Total	5	2	1	1	0	0	4	9	0.444444	0	0	0
										10 Average		0.5	0.5	0	0	0	0	0.5																	10 Total	3	3	0	0	0	0	3	6	0.5	0	0	0
										11 Average		0.75	0.25	0	0	0	0	0.25																	11 Total	12	4	0	0	0	0	4	16	0.25	0	0	0
										12 Average		0.75	0.166667	0	0	0.0833333	0	0.25																	12 Total	9	2	0	0	1	0	3	12	0.25	0	0	0
										13 Average		0.571429	0.285714	0.142857	0	0	0	0.428571																	13 Total	4	2	1	0	0	0	3	7	0.428571	0	0	0
										14 Average		0.916667	0	0	0	0	0.0833333	0.0833333																	14 Total	11	0	0	0	0	1	1	12	0.0833333	0	0	0
										15 Average		0.8	0.16	0	0	0	0	0.16																	15 Total	20	4	0	0	0	0	4	24	0.166667	1	0	0
										16 Average		0.846154	0	0	0	0	0	0																	16 Total	11	0	0	0	0	0	0	11	0	1	3	0
										17 Average		0.714286	0.214286	0	0.0714286	0	0	0.285714																	17 Total	10	3	0	1	0	0	4	14	0.285714	1	0	0
										18 Average		0.809524	0.190476	0	0	0	0	0.190476																	18 Total	17	4	0	0	0	0	4	21	0.190476	0	0	0
										19 Average		0.727273	0.181818	0	0.0909091	0	0	0.272727																	19 Total	8	2	0	1	0	0	3	11	0.272727	0	1	0
										20 Average		0.714286	0.142857	0	0.142857	0	0	0.285714																	20 Total	10	2	0	2	0	0	4	14	0.285714	0	3	0
										21 Average		0.526316	0.315789	0	0.0526316	0.0526316	0	0.421053																	21 Total	10	6	0	1	1	0	8	18	0.444444	1	0	0
										22 Average		0.75	0.15	0	0.05	0	0	0.2																	22 Total	15	3	0	1	0	0	4	19	0.210526	1	0	0
										23 Average		0.846154	0	0	0.0769231	0.0769231	0	0.153846																	23 Total	11	0	0	1	1	0	2	13	0.153846	0	0	0
										24 Average		0.6	0.266667	0	0.133333	0	0	0.4																	24 Total	9	4	0	2	0	0	6	15	0.4	0	0	0
										25 Average		1	0	0	0	0	0	0																	25 Total	8	0	0	0	0	0	0	8	0	0	0	0
										26 Average		0.166667	0.666667	0	0	0	0	0.666667																	26 Total	1	4	0	0	0	0	4	5	0.8	1	0	0
										27 Average		0.789474	0.105263	0.0526316	0	0	0	0.210526																	27 Total	15	2	1	0	0	0	4	19	0.210526	0	0	0
										28 Average		0.642857	0.214286	0	0.0714286	0	0	0.285714																	28 Total	9	3	0	1	0	0	4	13	0.307692	1	0	0
										29 Average		1	0	0	0	0	0	0																	29 Total	7	0	0	0	0	0	0	7	0	0	0	0
										30 Average		0.588235	0.294118	0	0	0.117647	0	0.411765																	30 Total	10	5	0	0	2	0	7	17	0.411765	0	0	0
										31 Average		0.8125	0.1875	0	0	0	0	0.1875																	31 Total	13	3	0	0	0	0	3	16	0.1875	0	0	0
										32 Average		0.6	0.1	0.1	0.2	0	0	0.4																	32 Total	6	1	1	2	0	0	4	10	0.4	0	0	0
										33 Average		0.714286	0.285714	0	0	0	0	0.285714																	33 Total	10	4	0	0	0	0	4	14	0.285714	0	0	0
										34 Average		0.4	0.4	0	0.2	0	0	0.6																	34 Total	2	2	0	1	0	0	3	5	0.6	0	0	0
										35 Average		0.714286	0.142857	0	0.142857	0	0	0.285714																	35 Total	5	1	0	1	0	0	2	7	0.285714	0	0	0
										36 Average		0.5	0.333333	0	0	0.166667	0	0.5																	36 Total	3	2	0	0	1	0	3	6	0.5	0	0	0
										37 Average		0.818182	0.0909091	0	0.0909091	0	0	0.181818																	37 Total	9	1	0	1	0	0	2	11	0.181818	0	0	0
										38 Average		0.6	0.2	0	0.2	0	0	0.4																	38 Total	6	2	0	2	0	0	4	10	0.4	0	0	0
										39 Average		1	0	0	0	0	0	0																	39 Total	8	0	0	0	0	0	0	8	0	0	0	0
										40 Average		0.5	0.5	0	0	0	0	0.5																	40 Total	3	3	0	0	0	0	3	6	0.5	0	0	0
										41 Average		1	0	0	0	0	0	0																	41 Total	3	0	0	0	0	0	0	3	0	0	0	0
										42 Average		1	0	0	0	0	0	0																	42 Total	1	0	0	0	0	0	0	1	0	0	0	0
										43 Average		0.333333	0.333333	0	0.333333	0	0	0.666667																	43 Total	1	1	0	1	0	0	2	3	0.666667	0	0	0
										44 Average		0.5	0.5	0	0	0	0	0.5																	44 Total	1	1	0	0	0	0	1	2	0.5	0	0	0
										45 Average		1	0	0	0	0	0	0																	45 Total	1	0	0	0	0	0	0	1	0	0	0	0
										46 Average		1	0	0	0	0	0	0																	46 Total	1	0	0	0	0	0	0	1	0	0	0	0
										47 Average		0.333333	0.333333	0	0.333333	0	0	0.666667																	47 Total	1	1	0	1	0	0	2	3	0.666667	0	0	0
										48 Average		0.666667	0.333333	0	0	0	0	0.333333																	48 Total	2	1	0	0	0	0	1	3	0.333333	0	0	0
										49 Average		1	0	0	0	0	0	0																	49 Total	1	0	0	0	0	0	0	1	0	0	0	0
										50 Average		0.5	0	0.5	0	0	0	0.5																	50 Total	1	0	1	0	0	0	1	2	0.5	0	0	0
										51 Average		0.6	0.2	0	0	0	0.2	0.4																	51 Total	3	1	0	0	0	1	2	5	0.4	0	0	0
										1 Average		1	0	0	0	0	0	0																	1 Total	2	0	0	0	0	0	0	2	0	0	0	0
										2 Average		0	0.666667	0	0.333333	0	0	1																	2 Total	0	2	0	1	0	0	3	3	1	0	0	0
										3 Average		1	0	0	0	0	0	0																	3 Total	1	0	0	0	0	0	0	1	0	0	0	0
										4 Average		0.5	0.3	0.1	0	0.1	0	0.5																	4 Total	5	3	1	0	1	0	5	10	0.5	0	0	0
										5 Average		0.6	0.2	0	0	0.2	0	0.4																	5 Total	3	1	0	0	1	0	2	5	0.4	0	0	0
										6 Average		0	1	0	0	0	0	1																	6 Total	0	1	0	0	0	0	1	1	1	1	0	0
										7 Average		0	1	0	0	0	0	1																	7 Total	0	1	0	0	0	0	1	1	1	0	0	0
										8 Average		0	1	0	0	0	0	1																	8 Total	0	1	0	0	0	0	1	1	1	0	0	0
										9 Average		1	0	0	0	0	0	0																	9 Total	2	0	0	0	0	0	0	2	0	0	0	0
										10 Average		0.666667	0	0	0.333333	0	0	0.333333																	10 Total	2	0	0	1	0	0	1	3	0.333333	0	0	0
										11 Average		0.666667	0.333333	0	0	0	0	0.333333																	11 Total	2	1	0	0	0	0	1	3	0.333333	0	0	0
										12 Average		1	0	0	0	0	0	0																	12 Total	2	0	0	0	0	0	0	2	0	0	0	0
										13 Average		0.5	0.166667	0	0.166667	0.166667	0	0.5																	13 Total	3	1	0	1	1	0	3	6	0.5	0	0	0
										14 Average		0.4	0.6	0	0	0	0	0.6																	14 Total	2	3	0	0	0	0	3	5	0.6	0	0	0
										15 Average		0.6	0	0	0.2	0	0	0.2																	15 Total	3	0	0	1	0	0	1	4	0.25	0	1	0
										16 Average		1	0	0	0	0	0	0																	16 Total	1	0	0	0	0	0	0	1	0	0	0	0
										17 Average		0.833333	0	0	0	0.166667	0	0.166667																	17 Total	5	0	0	0	1	0	1	6	0.166667	0	0	0
										18 Average		0	0	0	0	0	1	1																	18 Total	0	0	0	0	0	1	1	1	1	0	0	0
										19 Average		0.857143	0	0	0	0	0.142857	0.142857																	19 Total	6	0	0	0	0	1	1	7	0.142857	0	0	2
										20 Average		1	0	0	0	0	0	0																	20 Total	2	0	0	0	0	0	0	2	0	0	0	0
										21 Average		1	0	0	0	0	0	0																	21 Total	6	0	0	0	0	0	0	6	0	0	0	0
										22 Average		0.6	0.2	0	0.2	0	0	0.4																	22 Total	3	1	0	1	0	0	2	5	0.4	0	0	0
										23 Average		0.5	0.5	0	0	0	0	0.5																	23 Total	1	1	0	0	0	0	1	2	0.5	0	0	0
										25 Average		1	0	0	0	0	0	0																	25 Total	1	0	0	0	0	0	0	1	0	0	0	0
										26 Average		0	1	0	0	0	0	1																	26 Total	0	1	0	0	0	0	1	1	1	0	0	0
										27 Average		0.5	0.25	0.25	0	0	0	0.5																	27 Total	2	1	1	0	0	0	2	4	0.5	0	0	0
										28 Average		0.666667	0	0	0	0.333333	0	0.333333																	28 Total	2	0	0	0	1	0	1	3	0.333333	0	0	0
										29 Average		0.5	0	0	0.5	0	0	0.5																	29 Total	1	0	0	1	0	0	1	2	0.5	0	0	0
										30 Average		1	0	0	0	0	0	0																	30 Total	1	0	0	0	0	0	0	1	0	0	0	0
										31 Average		0.833333	0	0	0.166667	0	0	0.166667																	31 Total	5	0	0	1	0	0	1	6	0.166667	0	0	0
										32 Average		0.5	0.5	0	0	0	0	0.5																	32 Total	1	1	0	0	0	0	1	2	0.5	0	0	0
										33 Average		1	0	0	0	0	0	0																	33 Total	1	0	0	0	0	0	0	1	0	0	0	0
										36 Average		1	0	0	0	0	0	0																	36 Total	3	0	0	0	0	0	0	3	0	0	0	0
										37 Average		0.666667	0	0	0	0.333333	0	0.333333																	37 Total	2	0	0	0	1	0	1	3	0.333333	0	0	0
										38 Average		0	1	0	0	0	0	1																	38 Total	0	1	0	0	0	0	1	1	1	0	0	0
										39 Average		0	0	1	0	0	0	1																	39 Total	0	0	1	0	0	0	1	1	1	0	0	0
										41 Average		0.5	0	0.5	0	0	0	0.5																	41 Total	1	0	1	0	0	0	1	2	0.5	0	0	0
										43 Average		1	0	0	0	0	0	0																	43 Total	1	0	0	0	0	0	0	1	0	0	0	0
										45 Average		1	0	0	0	0	0	0																	45 Total	5	0	0	0	0	0	0	5	0	0	0	0
										46 Average		1	0	0	0	0	0	0																	46 Total	2	0	0	0	0	0	0	2	0	0	0	0
										47 Average		1	0	0	0	0	0	0																	47 Total	1	0	0	0	0	0	0	1	0	0	0	0
										49 Average		0.5	0	0	0.5	0	0	0.5																	49 Total	1	0	0	1	0	0	1	2	0.5	0	0	0
										50 Average		0.75	0.25	0	0	0	0	0.25																	50 Total	3	1	0	0	0	0	1	4	0.25	0	0	0
										51 Average		1	0	0	0	0	0	0																	51 Total	4	0	0	0	0	0	0	4	0	0	0	0
																																			Grand Total	2614	1184	199	843	536	247	3035	5649	0.537263	73	107	39

## Sheet: Explanations
Number	Sheet	Day	Month	Year	Time	Time	formatted_time	approximate_time	PIN	Name	Years	months	approx age	Sex	Temp	Days ill	Residence	Negative	falciparum	falciparum pos	ovale	malariae	gametocytes	count	leucocytes	transferred	haemoglobin	comments	resistant	trap	use net?
		of collection			of arrival	copy	only those with proper format	with '?' in data			age	age					by village	1=neg, 0 = not neg, blank no slide	Grade	if positive (sometimes no grade) 0 if not pos for falciparum				when done + parasites		to hospital			either resistant or a control slide (if pos is also resistant!)
																										otherwise not

## Sheet: Definitive data set sorted
Number	Sheet	Year	Month	Day	Date	ISO week	Time	formatted_time	approximate_time	PIN	Name	Years	months	approx age	Sex	Temp	Days ill	Residence	Negative	falciparum	falciparum pos	ovale	malariae	gametocytes	count	leucocytes	transferred	haemoglobin (g)	comments	resistant	trap	use net?
3385	150	2003	4	1	2003-04-01	14	00:00:00	09:04:00		3403	Dario Paulo	0	6		2		1	Furvela	0	3	1	0	3	0
3402	153	2003	4	1	2003-04-01	14	00:00:00	10:05:00		3802	Mira Constantino	1	1		1		1	Furvela
3306	141	2003	4	8	2003-04-08	15	00:00:00	10:15:00		3953	Palmira Bambo			50	2		1	jogo	0	0	0	1	0	0	0	0
3326	143	2003	4	8	2003-04-08	15	1900-01-08	1900-01-08		3942	Fatima Herinque	29			1		1	Furvela	0	1	1	0	0	1
3312	141	2003	4	8	2003-04-08	15	1900-01-11	1900-01-11			Celso Sergio	1	4		2	36	1	mocoduene	1	0	0	0	0	0
3240	132	2003	4	14	2003-04-14	16	00:00:00	10:15:00		382	Carla Antonio	2	11		2	39.6	1	Furvela	0	5	1	0	0	0
3233	131	2003	4	15	2003-04-15	16	00:00:00	11:15:00		3994	Milton J.Damiao	1	6		2	39.4	1	Furvela	0	3	1	0	0	0
3207	128	2003	4	16	2003-04-16	16				1234	Ricardina Afonso	8			2		1	Furvela	0	0	0	1	0	3	0	0
3166	123	2003	4	23	2003-04-23	17	00:00:00	11:03:00		4019	Rosa Ricardo	30			1		1	jogo	1	0	0	0	0	0
3163	123	2003	4	23	2003-04-23	17	1900-01-09	1900-01-09		4118	Julia Alberto	2	4		2	38	1	nharrumbo	0	4	1	0	0	0
3145	120	2003	4	25	2003-04-25	17	00:00:00	11:03:00		370	Olivia G.Ernesto	5			2		1	Furvela	0	3	1	0	0	0
3097	114	2003	4	30	2003-04-30	18	00:00:00	11:05:00		135	Nura Abdul	5			2	38.4	1	Furvela	0	4	1	0	0	0
3062	112	2003	5	2	2003-05-02	18	00:00:00	09:03:00		334	Claudio Felizberto	6			1		1	Furvela	0	1	1	0	0	0
3028	110	2003	5	9	2003-05-09	19	00:00:00	09:55:00		3054	Amelia Uachele	45			1		1	Furvela	0	1	1	0	0	0
2975	109	2003	5	13	2003-05-13	20	00:00:00	11:02:00		4096	Dirce Adriano	2	11		1		1	Furvela	0	4	1	0	0	0
2865	105	2003	5	23	2003-05-23	21	00:00:00	10:01:00			Aida Joaquim	4			2	38.8	1	matumbela	1	0	0	0	0	0
2869	105	2003	5	23	2003-05-23	21	00:00:00	11:05:00			Francisco Alexandre	1	1		2	36.8	1	Furvela	0	3	1	0	0	0
2815	102	2003	6	4	2003-06-04	23	00:00:00	10:18:00		4172	Carlos Ernesto	16			1		1	Furvela	1	0	0	0	0	0
2610	96	2003	6	19	2003-06-19	25	00:00:00	09:35:00		4206	Anivalda Herinque	11			1	37.1	1	Furvela	1	0	0	0	0	0
2600	95	2003	6	30	2003-06-30	27	00:00:00	10:04:00		3043	Cristina Americo	4			2	39.1	1	matumbela	0	4	1	0	0	0	310	510
2601	95	2003	6	30	2003-06-30	27	00:00:00	11:02:00		2074	Marta Rafael	5			2	39	1	Furvela
2546	93	2003	7	8	2003-07-08	28	1900-01-10	1900-01-10		4271	Xavito Tomas	2	4		2	39.1	1	Furvela	0	4	1	0	0	0
2504	92	2003	7	9	2003-07-09	28	00:00:00	11:04:00		4283	Josina Sabao	19			2		1	Furvela	0	0	1	0	0	1
2472	91	2003	7	14	2003-07-14	29	00:00:00	09:15:00		383	Isabel Armando	4			2	36.7	1	Furvela	0	0	0	0	1	0
2489	91	2003	7	16	2003-07-16	29	00:00:00	10:01:00		4297	Cabral C.Madrado	14			1		1	Furvela	0	1	1	0	0	0
2487	91	2003	7	16	2003-07-16	29	00:00:00	1902-08-11			Assucena Patricio	1	3		2		1	Furvela	0	5	1	0	0	0
2408	89	2003	7	22	2003-07-22	30	00:00:00	09:02:00		4309	Ginoca de Graca	1	4		2	38.9	1	Furvela
2427	89	2003	7	23	2003-07-23	30	00:00:00	11:04:00			Alberto Luis			19	1		1	Furvela	0	3	1	0	0	0
2395	88	2003	7	28	2003-07-28	31				4325	Amelia Jossias			48	1	38.5	1	Furvela	0	2	1	0	0	0
2313	85	2003	8	4	2003-08-04	32	00:00:00	10:35:00		1684	Ofelia Feliciano	4			2	38.4	1	jogo	0	4	1	0	0	0
2322	85	2003	8	5	2003-08-05	32	1900-01-09	1900-01-09		4357	Janeta Alberto	10			2		1	Furvela
2252	83	2003	8	13	2003-08-13	33	00:00:00	09:25:00		3847	Ernesto Mateus	33			2		1	Furvela	1	0	0	0	0	0
2263	83	2003	8	14	2003-08-14	33	00:00:00	10:04:00		6	Televina Samuel	16			1	37.4	1	Furvela
2268	83	2003	8	15	2003-08-15	33	00:00:00	09:25:00		4376	Osvaldo Alberto	0	1		1	39	1	Jogo
2222	82	2003	8	19	2003-08-19	34	00:00:00	09:38:00		1669	Diogo Jordao	3	8		1	37.3	1	furvela	0	4	1	0	0	0
2204	81	2003	8	27	2003-08-27	35	00:00:00	08:45:00			Arminda Joaquim	1	11		1	39.4	1	bovane	0	3	1	0	0	0
2176	80	2003	8	29	2003-08-29	35	00:00:00	08:38:00		4250	Vivaldo Miguel	0	10		2	37.6	1	maxixe	0	5	1	0	0	0
2151	79	2003	9	1	2003-09-01	36	00:00:00	09:45:00		562	Herculano Rafael	18			2		1	matumbela	1	0	0	0	0	0
2124	78	2003	9	8	2003-09-08	37	00:00:00	12:02:00							1	37.9	1	Furvela	1	0	0	0	0	0
2084	77	2003	9	10	2003-09-10	37	00:00:00	09:05:00		3642				30	2	38.6	1	bovane	0	1	1	0	0	0
3421	154	2003	9	13	2003-09-13	37	00:00:00	09:25:00		3847	Ernesto Mateus	33			1		1	Furvela	1	0	0	0	0	0
3434	154	2003	9	15	2003-09-15	38	00:00:00	08:05:00		269	Cremildo Antonio	2	11		2	39	1	Furvela	0	4	1	0	0	0
2102	77	2003	9	15	2003-09-15	38	00:00:00	08:18:00				14			1	38.8	1	Furvela
2104	77	2003	9	15	2003-09-15	38	1900-01-10	1900-01-10				26			2	39.6	1	nharrumbo
2034	75	2003	9	23	2003-09-23	39	00:00:00	08:22:00		4453		20			2		1	matumbela
1986	74	2003	9	24	2003-09-24	39	00:00:00	08:03:00		2378		2	7		1	38.6	1	Furvela
1996	74	2003	9	26	2003-09-26	39	00:00:00	10:54:00		308		11			2		1	Furvela
2003	74	2003	9	29	2003-09-29	40	00:00:00	08:03:00				0	11		1	37.4	1	Jogo
53	2	2004	1	9	2004-01-09	2						16			1		1	jogo	1	0	0	0	0	0
168	7	2004	1	15	2004-01-15	3	00:00:00	08:25:00		4890		11			1	36.1	1	Matumbela	1	0	0	0	0	0
174	7	2004	1	15	2004-01-15	3	00:00:00	09:01:00				2	3		2	39	1	Furvela	0	3	1	0	0	0
316	12	2004	1	26	2004-01-26	5	1900-01-09	1900-01-09		4937		1			1	38	1	matumbela	0	4	1	0	0	0
3	1	2004	1	27	2004-01-27	5	00:00:00	12:01:00		4949		3			2	38.2	1	RSA	0	3	1	0	0	0
20	1	2004	1	28	2004-01-28	5	00:00:00	10:57:00		4958		10			2		1	Furvela	1	0	0	0	0	0
470	17	2004	2	4	2004-02-04	6	00:00:00	11:45:00		1631		1			1	39.1	1	Furvela	0	4	1	0	0	0
391	14	2004	2	10	2004-02-10	7	00:00:00	10:45:00				1	8		2	38.6	1	Furvela
380	14	2004	2	10	2004-02-10	7	1900-01-10	1900-01-10				45			2		1	Furvela									hospital
608	22	2004	2	17	2004-02-17	8	00:00:00	11:07:00		4148		1	5		1	40	1	Furvela	0	3	1	0	0	0
566	20	2004	2	20	2004-02-20	8	00:00:00	10:25:00		2123		2	8		2	39	1	Furvela	0	3	1	0	0	0
569	20	2004	2	23	2004-02-23	9	00:00:00	07:38:00				19			2		1	Matumbela
716	25	2004	2	24	2004-02-24	9	00:00:00	07:58:00		6105		0	2		2	38.4	1	Furvela	0	1	1	0	0	0
1210	43	2004	2	26	2004-02-26	9	00:00:00	11:17:00		6123		5			1	39	1	Matumbela	1	0	0	0	0	0
1038	37	2004	3	1	2004-03-01	10	00:00:00	08:04:00				4				38.5	1	Furvela	0	3	1	0	0	0
984	35	2004	3	5	2004-03-05	10	00:00:00	09:01:00		6147		7			1	38.1	1	Bovane	1	0	0	0	0	0
955	34	2004	3	8	2004-03-08	11	1900-01-10	1900-01-10				1	8		2	38.7	1	Furvela	0	3	1	0	0	0
927	33	2004	3	10	2004-03-10	11	00:00:00	08:14:00		379		84			2		1	Furvela	0	1	1	0	0	0
978	34	2004	3	10	2004-03-10	11	1900-01-08	1900-01-08				50			1		1	Furvela	1	0	0	0	0	0
911	32	2004	3	12	2004-03-12	11	00:00:00	08:05:00		6106		1	2		1	37.1	1	Furvela	0	5	1	0	0	0
913	32	2004	3	12	2004-03-12	11	00:00:00	09:18:00		4147		2	4		1	39.3	1	Furvela	0	3	1	0	0	0
839	30	2004	3	16	2004-03-16	12	00:00:00	10:03:00		6180		0.0575342			2	37.3	1	jogo	0	3	1	0	0	0
807	29	2004	3	18	2004-03-18	12	00:00:00	10:08:00		2198		2	5		2	39	1	Furvela	0	4	1	0	0	0
823	29	2004	3	22	2004-03-22	13	00:00:00	07:55:00		6188		2	9		2	39.4	1	Jogo	0	5	1	0	0	0
766	27	2004	3	30	2004-03-30	14	00:00:00	08:05:00		4205		3	1		2	38.4	1	Furvela	0	3	1	0	0	0
775	27	2004	3	31	2004-03-31	14	00:00:00	07:05:00		3167		2	4		1	36.8	1	Jogo	0	4	1	0	0	0
1090	39	2004	4	8	2004-04-08	15	00:00:00	09:02:00		6227		1	7		1	39.2	1	Furvela	0	5	1	0	0	0								TR
1318	47	2004	5	6	2004-05-06	19	00:00:00	08:44:00				7			1		1	Furvela	0	3	1	0	0	0
1322	47	2004	5	7	2004-05-07	19	00:00:00	08:25:00				23			1		1	Uwa
1404	50	2004	6	14	2004-06-14	25	1900-01-09	1900-01-09		6277		0	8		2	35.8	1	Jogo	0	3	1	0	0	0
1482	53	2004	7	6	2004-07-06	28	00:00:00	09:05:00		6302		0	3		1	38.8	1	Furvela	1	0	0	0	0	0
1487	53	2004	7	9	2004-07-09	28	00:00:00	10:04:00		1855							1	Furvela	0	4	1	0	0	0
1502	54	2004	7	16	2004-07-16	29	1900-01-08	1900-01-08				0	8		2	38.1	1	Jogo	0	3	1	0	0	0
1517	55	2004	7	20	2004-07-20	30	00:00:00	09:01:00				2	5		2	36.8	1	Furvela	0	1	1	0	0	0
1547	56	2004	7	28	2004-07-28	31	00:00:00	10:01:00		6323		2			2	39.2	1	C. Maputo	0	4	1	0	0	0
1554	56	2004	7	30	2004-07-30	31	00:00:00	11:04:00				2			2		1	Furvela	0	3	1	0	0	0
1599	58	2004	8	16	2004-08-16	34	00:00:00	10:55:00				5			1		1	Furvela	0	3	1	0	0	0
1614	59	2004	8	20	2004-08-20	34	00:00:00	09:04:00		3120		2	1		2	39.7	1	Furvela	0	4	1	0	0	0			hospital
1663	61	2004	9	2	2004-09-02	36	1900-01-10	1900-01-10		6077		2	4		2	37.1	1	Furvela	0	4	1	0	0	0
1735	63	2004	9	24	2004-09-24	39	00:00:00	09:05:00		4232		1	6		1	38.6	1	Furvela	0	5	1	0	0	0
1766	65	2004	10	1	2004-10-01	40	00:00:00	08:02:00		4969		4	6		1	39.3	1	Furvela	0	4	1	0	0	0
1775	65	2004	10	4	2004-10-04	41	00:00:00	09:16:00				3			1	37	1	Furvela	1	0	0	0	0	0
1953	72	2004	10	8	2004-10-08	41	00:00:00	11:04:00		294		5			1	39.3	1	furvela	0	1	1	0	0	0
1973	72	2004	10	13	2004-10-13	42	00:00:00	11:17:00		6367		1	5		2	37.7	1	furvela	0	1	1	0	0	0
1809	66	2004	10	19	2004-10-19	43	00:00:00	09:16:00		6402		1	3		1	36	1	Furvela	0	1	1	0	0	0
1843	67	2004	10	29	2004-10-29	44	00:00:00	10:05:00		2848		4			2	38.2	1	Jogo
1847	68	2004	11	1	2004-11-01	45	00:00:00	08:15:00		6415		0	6		2	39.5	1	Furvela
1880	69	2004	11	11	2004-11-11	46	00:00:00	08:02:00				4			2	37.3	1	Furvela
1882	69	2004	11	11	2004-11-11	46	00:00:00	08:03:00				2	4		1	39	1	Jogo	0	1	1	0	0	0
1881	69	2004	11	11	2004-11-11	46	00:00:00	08:03:00				2			1	36.4	1	Jogo
1885	69	2004	11	12	2004-11-12	46	00:00:00	08:05:00		269		4			1	37.7	1
1888	69	2004	11	12	2004-11-12	46	00:00:00	09:02:00		6429		4			2	37.9	1	Furvela
1892	69	2004	11	15	2004-11-15	47	00:00:00	09:25:00		5110		3			1	39.2	1	Furvela
1893	69	2004	11	15	2004-11-15	47	00:00:00	10:15:00		6432		0	6		1	36.8	1	Jogo
1895	69	2004	11	15	2004-11-15	47	00:00:00	11:17:00		6366		0	5		2	36.7	1	Furvela
1901	69	2004	11	16	2004-11-16	47	00:00:00	11:58:00		6369		2	4		2	36.5	1	Jogo
1907	70	2004	11	18	2004-11-18	47	00:00:00	08:47:00		4765		1	8		1	38.2	1	Furvela	0	4	1	0	0	0
1926	70	2004	11	23	2004-11-23	48	00:00:00	10:25:00				2			2	38.9	1	Furvela	0	4	1	0	0	0
1938	71	2004	11	29	2004-11-29	49	00:00:00	08:01:00		6448		1			2	38.2	1	furvela	0	5	1	0	0	0
1944	71	2004	11	29	2004-11-29	49	00:00:00	11:05:00		6451		7			1	37.7	1	furvela	0	4	1	0	0	0	470	500
4384	187	2007	1	11	2007-01-11	2	11:47:00	11:47:00		7327	Gledisse O.Calisto	0	7		2	38.2	1	bovane	0	2	1	0	0	0
4426	188	2007	1	17	2007-01-17	3	11:38:00	11:38:00		1744	Halima Francisco	18			2	38.5	1	nharrumbo	0	1	1	0	0	0
3484	156	2008	1	8	2008-01-08	2	00:00:00	11:04:00		6410	Nilsa Francisco	3	9		2	36.5	1	Furvela	0	1	1	0	0	0
3531	158	2008	1	14	2008-01-14	3	00:00:00	10:31:00			Castigo Bernardo 3837			50	2	35.7	1	Furvela	1	0	0	0	0	0
3562	159	2008	1	16	2008-01-16	3	00:00:00	10:04:00			Acumiro Manuel	5			1	39.1	1	jogo	0	2	1	0	0	0
3608	161	2008	1	21	2008-01-21	4	00:00:00	11:45:00		7122	Alex Rui	2			1	39.4	1	Furvela	0	1	1	0	0	0
3657	162	2008	1	25	2008-01-25	4	00:00:00	10:51:00			Vanil da Sarifa	6			1	38	1	Furvela	0	1	1	0	0	0
3707	164	2008	1	30	2008-01-30	5	00:00:00	11:04:00		7691	Inocencio Jacinto	1	1		2	39.1	1	Furvela	0	2	1	0	0	0
3765	166	2008	2	11	2008-02-11	7	00:00:00	09:52:00		7920	Arcadio Marden	2	6		1	39	1	Furvela	0	5	1	0	0	0
3766	166	2008	2	11	2008-02-11	7	00:00:00	11:02:00			Calton Sidonio	14			2	38.8	1	matumbela	1	0	0	0	0	0
5550	226	2008	3	5	2008-03-05	10	11:00:00	11:00:00		6415	Quitao Francisco	4			1	38	1	Furvela	0	3	1	0	0	0
5571	226	2008	3	10	2008-03-10	11	08:45:00	08:45:00		7969	Nelson Antonio	1			1	38.8	1	Furvela	0	1	1	0	0	0
5620	228	2008	3	17	2008-03-17	12	11:19:00	11:19:00		7988	Filoca Tomas	3	7		1	36	1	jogo	0	4	1	0	0	0
5469	223	2008	4	15	2008-04-15	16	09:20:00	09:20:00		8032	Jorge Albino	1	6		2	37.2	1	Furvela	0	3	1	0	0	0
5443	222	2008	4	22	2008-04-22	17	11:45:00	11:45:00			Clesio da Teresa	4			1	39.2	1	Furvela	0	5	1	0	0	0
3736	165	2008	5	5	2008-05-05	19	00:00:00	09:19:00		8060	Rosa Zefanias	16			1		1	jogo
3788	167	2008	5	7	2008-05-07	19	00:00:00	08:51:00		8058	Celso Antonio	4			1	38.5	1	jogo	0	4	1	0	0	0
3825	168	2008	5	13	2008-05-13	20	00:00:00	09:49:00		7049	Nelson Jose	2	6		1	40.2	1	Furvela	0	4	1	0	0	0
4006	174	2008	7	3	2008-07-03	27	10:39:00	10:39:00		8161	Idalencia Armando	2	3		2	39.8	1	Furvela	0	5	1	0	0	0
3910	171	2008	9	16	2008-09-16	38	09:53:00	09:53:00		7698	Orcidia da E. Damiao	2	5		1	38	1	Inharrumbo
3928		2008	9	17	2008-09-17	38	11:27:00	11:27:00		8162	Jose Horacio	1	5		1	37.4	1
3890	170	2008	9	22	2008-09-22	39	10:55:00	10:55:00			Chelton Gildo	1			1	39.6	1	Furvela	0	4	1	0	0	0			hospital
3896	170	2008	9	23	2008-09-23	39	09:36:00	09:36:00		7387	Fidel Joaquim	2	4		2		1	Matumbela
3907	170	2008	9	23	2008-09-23	39	11:34:00	11:34:00		8226	Cecilia Inosse			11	1	39.1	1	Furvela	0	1	1	0	0	0
5364	219	2008	11	24	2008-11-24	48	08:04:00	08:04:00		8351	Crimildo Jose	4	3		2	37.1	1	Furvela	0	2	1	0	0	0
5173	214	2008	11	24	2008-11-24	48	08:34:00	08:34:00		8352	Ainura Herinque	1	4		1	36.6	1	Furvela	1	0	0	0	0	0
5187	214	2008	11	25	2008-11-25	48	08:18:00	08:18:00		8356	Regina Antonio	13			1	39.1	1	matumbela	0	1	1	0	0	0
5161	213	2008	11	28	2008-11-28	48	08:50:00	08:50:00		7688	Lucia Helario	1	2		1	39	1	h de lihonzuane	0	5	1	0	0	0
5170	213	2008	11	28	2008-11-28	48	11:11:00	11:11:00			Pai Raimo	11			2	38.5	1	Furvela	0	1	1	0	0	0
4238	182	2008	12	1	2008-12-01	49	09:57:00	09:57:00		7134	Anicha Sebastiao	2	10		1	36.9	1	Furvela	0	2	1	0	0	0
4205	181	2008	12	8	2008-12-08	50	10:13!!??		10:00:00		Andre Maelane			90?	1		1	Furvela	0	3	1	0	0	0
4274	183	2008	12	15	2008-12-15	51	08:27:00	08:27:00			Jose Fernando	8			2		1	jogo	1	0	0	0	0	0
4276	183	2008	12	15	2008-12-15	51	08:41:00	08:41:00			Ivone Geremias	17			1		1	jogo	0	3	1	0	0	0
3861	169	2009	2	19	2009-02-19	8	00:00:00	10:58:00		7934	Jorge Luis			15	1	35.7	1	jogo	1	0	0	0	0	0
4894	205	2009	5	26	2009-05-26	22	10:35:00	10:35:00		8706	Constancia Orlando	3			2		1	jogo	0	4	1	0	0	0
4833	203	2009	6	29	2009-06-29	27	09:36:00	09:36:00		8761	Victor Ricardo	1	6		2		1	jogo	0	3	1	0	0	0
4794	202	2009	7	1	2009-07-01	27	08:36:00	08:36:00		7554	Elva da Olencia	2	8		2	39.5	1	Furvela	0	3	1	0	0	0
4776	201	2009	7	7	2009-07-07	28	10:49:00	10:49:00		7059	Gercia Eduardo	3	10		2	39	1	Furvela	1	0	0	0	0	0
4789	201	2009	7	9	2009-07-09	28	10:00:00	10:00:00			Edvalda Simiao	0	4		1	38.1	1	Furvela	0	4	1	0	0	0
4736	200	2009	7	10	2009-07-10	28	10:04:00	10:04:00			Filaderfia Aunora	12			2		1	Furvela
4749	200	2009	7	14	2009-07-14	29	08:50:00	08:50:00		8500	Daizinha Carlos	2	1		2	39.6	1	Furvela	0	4	1	0	0	0
4720	199	2009	7	16	2009-07-16	29	11:07:00	11:07:00			Roberto Emidio	8			2	37.5	1	Furvela	1	0	0	0	0	0
4726	199	2009	7	17	2009-07-17	29				7387	Fidel Joaquim	3	2		1	38.6	1	Furvela	0	2	1	0	0	0						resistente
4725	199	2009	7	17	2009-07-17	29					Edvania da Zelia	6			2		1	jogo	0	2	1	0	0	0
4653	196	2009	8	3	2009-08-03	32	09:50:00	09:50:00			Felix Afonso	1			1	37	1	Furvela	0	4	1	0	0	0
4503	192	2009	8	13	2009-08-13	33	12:00:00	12:00:00		7941	Zanita Reginaldo	1	1		1	37.4	1	Furvela	0	3	1	0	0	0
4504	192	2009	8	14	2009-08-14	33	08:47:00	08:47:00		8812	Albertina Ricardo			30	2	35.8	1	Furvela	1	0	0	0	0	0
4506	192	2009	8	14	2009-08-14	33	09:50:00	09:50:00			Catarina Manuel			40	1		1	jogo	1	0	0	0	0	0
4508	192	2009	8	14	2009-08-14	33	10:32:00	10:32:00			Efraime Alfredo	3			1	38.7	1	Furvela	0	1	1	0	0	0
2120	78	2003	1	5	2003-01-05	1	00:00:00	07:55:00				17			1	36.7	2	matumbela	0	1	1	0	0	0
2121	78	2003	1	5	2003-01-05	1	00:00:00	08:36:00		2127		5			2	37.1	2	jogo	0	1	1	0	0	0
2122	78	2003	1	5	2003-01-05	1	00:00:00	08:44:00						55	2		2	Furvela
2123	78	2003	1	5	2003-01-05	1	00:00:00	10:21:00							2		2	Furvela	0	3	1	0	0	0
3394	152	2003	4	1	2003-04-01	14	00:00:00	07:05:00		3910	Fania B.Jose	0	11		2	38.2	2	matumbela	0	5	1	0	0	0								TR
3398	152	2003	4	1	2003-04-01	14	00:00:00	08:01:00		887	Jorge Simiao	14			2		2	Furvela	1	0	0	0	0	0			hospital
3401	152	2003	4	1	2003-04-01	14	00:00:00	08:04:00			Olga Simiao	23			2		2	Furvela
3378	150	2003	4	1	2003-04-01	14	00:00:00	08:05:00		3914	Pedro Penicela			55	1		2	nharrumbo												control
3399	152	2003	4	1	2003-04-01	14	00:00:00	08:13:00		3913	Carlos Jose	13			2		2	Furvela	1	0	0	0	0	0
3400	152	2003	4	1	2003-04-01	14	00:00:00	08:18:00		2930	Carlitos Bernardo	1	3		2	38.7	2	jogo	1	0	0	0	0	0
3383	150	2003	4	1	2003-04-01	14	00:00:00	09:03:00		1088	Beatriz Lifanequico	60			1		2	Furvela	1	0	0	0	0	0
3384	150	2003	4	1	2003-04-01	14	00:00:00	09:35:00			Isabel Samuel				2		2	Furvela	0	1	1	0	0	0
3404	153	2003	4	1	2003-04-01	14	00:00:00	10:02:00		3132	Fernanda Jose	0	10		1		2	matumbela	0	3	1	0	0	0
3403	153	2003	4	1	2003-04-01	14	00:00:00	10:12:00			Gilda Antonio	20			2		2	chidanga
3406	153	2003	4	1	2003-04-01	14	00:00:00	11:03:00		3918	Custodio Joao	13			1		2	mbatane	0	5	1	0	0	0
3395	152	2003	4	1	2003-04-01	14	1900-01-08	1900-01-08		3911	Dulce Mario	13			2		2	Furvela
3409	153	2003	4	2	2003-04-02	14	00:00:00	08:24:00		3921	Celina Ernesto	21			2		2	matumbela	1	0	0	0	0	0
3389	151	2003	4	2	2003-04-02	14	00:00:00	09:03:00		141	Raimundo Tomas	17			2		2	matumbela	0	0	1	0	0	1
3372	149	2003	4	2	2003-04-02	14	00:00:00	10:03:00		383	Isabel Armando	3			2		2	Furvela	0	4	1	0	0	0	529	40
3371	149	2003	4	2	2003-04-02	14	00:00:00	10:25:00		4021	Marta Julio	21			2		2	jogo
3374	149	2003	4	3	2003-04-03	14	00:00:00	08:45:00		3926	Ana Roberto	0	4		1		2	Furvela	0	4	1	0	0	0
3364	148	2003	4	3	2003-04-03	14	00:00:00	10:05:00			Ginoca Isabel	1	4		1		2	Furvela	0	1	1	0	0	0
3366	148	2003	4	3	2003-04-03	14	00:00:00	11:11:00		51	Dalila Samuel	2	2		2		2	Furvela	0	3	1	0	0	0
3367	148	2003	4	3	2003-04-03	14	00:00:00	11:15:00			Dina Samuel	2			1	39	2	Furvela	0	1	1	0	0	0
3377	149	2003	4	3	2003-04-03	14	1900-01-09	1900-01-09		117	Benilde Francisco	13			2		2	Furvela	0	1	1	0	0	0
3369	148	2003	4	4	2003-04-04	14	00:00:00	08:05:00		3931	Fausia Luis	0	2		2	38.4	2	Furvela	0	4	1	0	0	0
3347	146	2003	4	4	2003-04-04	14	00:00:00	08:32:00		3570	Arnaldo Jonas	5			1		2	Furvela
3349	146	2003	4	4	2003-04-04	14	00:00:00	08:38:00		3070	Joaquim Armando	1			1	40.4	2	jogo
3353	146	2003	4	4	2003-04-04	14	00:00:00	09:01:00		3934	Ranito Manuel	2			1		2	malaia
3355	147	2003	4	4	2003-04-04	14	00:00:00	10:47:00		3047	Lucia Antonio	8			1		2	Furvela	0	0	1	0	0	1
3357	147	2003	4	4	2003-04-04	14	00:00:00	11:05:00		3936	Arao Alberto	3			1	36.6	2	matumbela
3368	148	2003	4	4	2003-04-04	14	1900-01-08	1900-01-08		3930	Belarmino Carlos	41			2		2	Furvela	0	0	1	0	0	1
3358	147	2003	4	7	2003-04-07	15	00:00:00	08:21:00		3637	Maria Jacinto	0	1		1		2	jogo	1	0	0	0	0	0
3359	147	2003	4	7	2003-04-07	15	00:00:00	09:02:00		18	Tomas Raimundo	4			1	38.6	2
3361	147	2003	4	7	2003-04-07	15	00:00:00	09:53:00			Ivone Mauricio	1	9		2		2	Furvela	0	3	1	0	0	0
3324	143	2003	4	8	2003-04-08	15	00:00:00	07:05:00		3940	Alzira Mateus	11			1		2	Furvela	1	0	0	0	0	0
3323	143	2003	4	8	2003-04-08	15	00:00:00	07:44:00		3939	Filipe Amone	15			2		2	matumbela	1	0	0	0	0	0
3325	143	2003	4	8	2003-04-08	15	00:00:00	07:58:00		3941	Victor Oliveira	2	3		2	36	2	Furvela	0	3	1	0	0	0
3327	143	2003	4	8	2003-04-08	15	00:00:00	08:01:00		3127	Ernesto Gildo	12			2		2	jogo	1	0	0	0	0	0
3315	142	2003	4	8	2003-04-08	15	00:00:00	08:48:00		3946	Emilia Damingos	0	4		2		2	Furvela	0	5	1	0	0	0
3319	142	2003	4	8	2003-04-08	15	00:00:00	09:02:00		1176	Vicente Mufanequico	61			2		2	Furvela	1	0	0	0	0	0
3333	144	2003	4	8	2003-04-08	15	00:00:00	09:05:00		3951	Gildo Orlando	0	4		1		2	Furvela	0	4	1	0	0	0
3332	144	2003	4	8	2003-04-08	15	00:00:00	09:45:00		3950	Severiano Orlando	0	4		2	37.1	2	jogo	0	5	1	0	0	0
3334	144	2003	4	8	2003-04-08	15	00:00:00	09:58:00		12	Celito Raimundo	3			1		2	Furvela	0	4	1	0	0	0
3337	144	2003	4	8	2003-04-08	15	00:00:00	10:01:00		3952	Emilia Rafael	13			1		2	jogo	1	0	0	0	0	0
3307	141	2003	4	8	2003-04-08	15	00:00:00	10:02:00		1658	Oscar Zacarias	24			1		2	Furvela	1	0	0	0	0	0
3308	141	2003	4	8	2003-04-08	15	00:00:00	10:25:00		3954	Paiva Victorino	11			2		2	Furvela
3310	141	2003	4	8	2003-04-08	15	00:00:00	10:45:00		3955	Delefina Pascoal	25			2		2	jogo	0	1	1	0	0	0						resistente
3311	141	2003	4	8	2003-04-08	15	00:00:00	10:58:00		372	Pedro Ernesto	11			1		2	jogo	1	0	0	0	0	0
3313	141	2003	4	8	2003-04-08	15	00:00:00	11:01:00		3956	Ilda Alfredo	0.0575342			1	38.7	2	Huwa	1	0	0	0	0	0						resistente
3298	140	2003	4	8	2003-04-08	15	00:00:00	11:03:00		3870	Teresa Antonio	23			2	36.8	2	jogo	0	1	1	0	0	0
3299	140	2003	4	8	2003-04-08	15	00:00:00	11:35:00		2797	Ginoca Joaquim	0	6		1		2	nharrumbo	1	0	0	0	0	0
3318	142	2003	4	8	2003-04-08	15	1900-01-09	1900-01-09		3947	Rafael Faduco			65	2		2	nhalivala
3314	142	2003	4	8	2003-04-08	15				3945	Alberto Armando	0	3		2		2	Furvela	0	0	0	1	0	0	0	0
3305	140	2003	4	9	2003-04-09	15	00:00:00	08:04:00		3715	Claudia Mauricio	1			2	41	2	jogo	0	0	0	0	1	0
3301	140	2003	4	9	2003-04-09	15	00:00:00	08:15:00		2076	Mirsa Marta	17			2		2	Furvela	0	3	1	0	0	0
3303	140	2003	4	9	2003-04-09	15	00:00:00	08:34:00		3958	Januario Judiao	16			1		2	Furvela
3294	139	2003	4	9	2003-04-09	15	00:00:00	09:02:00		3964	Americo Jose	0	6		1	36.4	2	chidanga	0	3	1	0	0	0
3296	139	2003	4	9	2003-04-09	15	00:00:00	09:58:00		3966	Olinda Sebastiao	0	2		1		2	Furvela	0	4	1	0	0	0
3283	138	2003	4	9	2003-04-09	15	00:00:00	11:16:00		3059	Aderito Felizberto	1	1		2		2	Furvela	0	1	1	0	0	0
3284	138	2003	4	9	2003-04-09	15	00:00:00	11:42:00		1435	Beatriz Fernando	17			2		2	bovane	0	1	1	0	0	0
3286	138	2003	4	10	2003-04-10	15	00:00:00	08:05:00		311	Emilia Alberto	41			2		2	Furvela	1	0	0	0	0	0
3285	138	2003	4	10	2003-04-10	15	00:00:00	08:48:00		310	Nelio Jose	2	1		1		2	Furvela
3287	138	2003	4	10	2003-04-10	15	00:00:00	08:55:00			Jorge Anibal	6			1		2	Furvela	0	3	1	0	0	0
3276	137	2003	4	10	2003-04-10	15	00:00:00	09:03:00		1634	Vasco Sumburane	60			2		2	Furvela	1	0	0	0	0	0
3278	137	2003	4	10	2003-04-10	15	00:00:00	09:53:00		3955	Isabel Fernando			55	2		2	Furvela	1	0	0	0	0	0
3266	136	2003	4	10	2003-04-10	15	00:00:00	10:02:00		3949	Taliba Junabaia	0	6		2		2	lihuwa
3269	136	2003	4	10	2003-04-10	15	00:00:00	10:05:00		8	Inancio Samuel	6			1		2	Furvela	1	0	0	0	0	0
3280	137	2003	4	10	2003-04-10	15	00:00:00	10:09:00		3957	Acacio Ernesto	0	6		1	37.4	2	matumbela	0	0	0	0	4	0
3281	137	2003	4	10	2003-04-10	15	00:00:00	10:15:00		3958	Constancia Alfeu	20			2		2	Furvela
3272	136	2003	4	10	2003-04-10	15	00:00:00	11:02:00			Gina Ernesto	25			2		2	Furvela	0	1	1	0	0	0
3270	136	2003	4	10	2003-04-10	15	00:00:00	11:09:00			Armando Fernando				1		2	Furvela	0	0	0	0	1	0
3271	136	2003	4	10	2003-04-10	15	00:00:00	11:15:00		3969	Artezinha Ernesto	0	4		2		2	jogo
3258	135	2003	4	11	2003-04-11	15	00:00:00	08:08:00		3970	Isaura Bernardo	21			2		2	Furvela	0	1	1	0	0	0
3263	135	2003	4	11	2003-04-11	15	00:00:00	09:02:00		3973	Irene Francisco			45	2		2	mahangue	0	3	1	0	0	0
3251	134	2003	4	11	2003-04-11	15	00:00:00	10:45:00			Egelina Carlos	0	5		1		2	jogo	0	4	1	0	0	0
3253	134	2003	4	14	2003-04-14	16	00:00:00	08:01:00		3975	Roque Tomas	10			2		2	Furvela	1	0	0	0	0	0
3255	134	2003	4	14	2003-04-14	16	00:00:00	08:05:00		3976	Luisa Mateus	0	6		1	39.1	2	Furvela	0	4	1	0	0	0
3236	132	2003	4	14	2003-04-14	16	00:00:00	09:03:00		3978	Sonia Manuel	1	6		1	40.4	2	m`bene	0	5	1	0	0	0
3234	132	2003	4	14	2003-04-14	16	00:00:00	09:18:00		3888	Arsenia J.Pedro	0	3		1	36.4	2	nharrumbo	0	5	1	0	0	0
3237	132	2003	4	14	2003-04-14	16	00:00:00	09:35:00		3670	Emilia Izidro	0	6		1	39.1	2	jogo	0	4	1	0	0	0
3238	132	2003	4	14	2003-04-14	16	00:00:00	09:45:00		3979	Amelia Francisco	4			2		2	jogo	1	0	0	0	0	0
3241	132	2003	4	14	2003-04-14	16	00:00:00	10:01:00		3992	Julinho Alfredo	18			2		2	Furvela	1	0	0	0	0	0
3242	133	2003	4	14	2003-04-14	16	00:00:00	10:54:00			Joana Joao	37			2		2	Furvela	1	0	0	0	0	0
3243	133	2003	4	14	2003-04-14	16	00:00:00	10:58:00			Nilsa Teofel	1			2	39.4	2	iharrime	0	4	1	0	0	0
3246	133	2003	4	14	2003-04-14	16	00:00:00	11:01:00		3983	Joao Antonio	14			2		2	Furvela	0	1	1	0	0	0
3249	133	2003	4	14	2003-04-14	16	00:00:00	11:04:00		3986	Carlos Fabiao	30			2	37.8	2	Furvela	1	0	0	0	0	0
3247	133	2003	4	14	2003-04-14	16	00:00:00	11:28:00		3984	Arlindo Antonio	1	8		2		2	Furvela	0	4	1	0	0	0			hospital
3256	134	2003	4	14	2003-04-14	16	1900-01-09	1900-01-09		448	Alberto Jossai	3			1		2	Furvela	0	1	0	3	0	0			hospital
3218	130	2003	4	15	2003-04-15	16	00:00:00	08:01:00		3987	Castro Antonio	0	2		2	36.8	2	Furvela
3221	130	2003	4	15	2003-04-15	16	00:00:00	08:46:00		3989	Helena Joao			50	2		2	Furvela	1	0	0	0	0	0
3222	130	2003	4	15	2003-04-15	16	00:00:00	08:53:00		3990	Fenice Pedro	0	4		2	38.1	2	Furvela	0	4	1	0	0	0
3226	131	2003	4	15	2003-04-15	16	00:00:00	09:04:00		3993	Joaquina Alfredo	5			2		2	Furvela	1	0	0	0	0	0
3227	131	2003	4	15	2003-04-15	16	00:00:00	09:05:00		121	Lopes Herinque	5			1		2	Furvela	1	0	0	0	0	0
3231	131	2003	4	15	2003-04-15	16	00:00:00	10:04:00		3900	Americo Joaquim	0	10		1	37.1	2	matumbela	1	0	0	0	0	0
3230	131	2003	4	15	2003-04-15	16	00:00:00	10:35:00		1468	Pascoal Vasco	16			1		2	Furvela	0	3	1	0	0	0
3210	129	2003	4	15	2003-04-15	16	00:00:00	11:44:00			Antonio Rafael				1		2	Furvela
3211	129	2003	4	16	2003-04-16	16	00:00:00	07:04:00		3995	Joaquina Domingos	0	10		1	37.5	2	jogo	0	4	1	0	0	0
3215	129	2003	4	16	2003-04-16	16	00:00:00	08:55:00		3998	Florencia Francisco	13			2		2	Furvela
3204	128	2003	4	16	2003-04-16	16	00:00:00	09:04:00		3999	Beatriz Jacinto	6	4		2		2	jogo	0	1	1	0	0	0						resistente
3205	128	2003	4	16	2003-04-16	16	00:00:00	09:55:00		4000	Celia Lourenco	0	4		1	37.1	2	Furvela	0	5	1	0	0	0
3206	128	2003	4	16	2003-04-16	16	00:00:00	10:25:00		465	Graca Bejamim	30			2		2	Furvela	1	0	0	0	0	0
3209	128	2003	4	16	2003-04-16	16	00:00:00	10:55:00		2003	Gloria Joao	1	11		2	39.7	2	Furvela	0	4	1	0	0	0
3212	129	2003	4	16	2003-04-16	16				3996	Julio Domingos	0	10		2	38.9	2	matumbela	0	0	0	1	0	0	0	0
3197	127	2003	4	17	2003-04-17	16	00:00:00	09:15:00		4003	Luisa Almeida			70	2	37	2	Furvela	0	0	0	1	0	0	0	0
3198	127	2003	4	17	2003-04-17	16	00:00:00	09:22:00		4004	Florencia Ernesto	12			2		2	Furvela
3200	127	2003	4	17	2003-04-17	16	00:00:00	10:58:00		3716	Manuel Miguel	0	5		1		2	jogo	0	4	1	0	0	0
3187	126	2003	4	18	2003-04-18	16	00:00:00	07:45:00		3291	Rafael Armando	46			2		2	jogo	1	0	0	0	0	0
3189	126	2003	4	18	2003-04-18	16	00:00:00	08:52:00			Constntino Manecas	42			2		2	Furvela	1	0	0	0	0	0
3190	126	2003	4	18	2003-04-18	16	00:00:00	09:04:00		2810	Salgencia Carlos	4			2		2	muengue	1	0	0	0	0	0
3191	126	2003	4	18	2003-04-18	16	00:00:00	09:45:00		4006	Rosa da Silva			50	2		2	Furvela	0	0	0	0	3	0
3340	145	2003	4	18	2003-04-18	16	00:00:00	10:05:00		2268	Deniva A.Eduardo	1	8		2		2	Furvela	0	5	1	0	0	0
3192	126	2003	4	18	2003-04-18	16	00:00:00	10:08:00		3528	Helton Jose	0	6		2	38	2	matumbela	0	3	1	0	0	0
3338	145	2003	4	18	2003-04-18	16	00:00:00	10:43:00		4008	Helena Rafael			50	2		2	Furvela	1	0	0	0	0	0
3188	126	2003	4	18	2003-04-18	16	1900-01-08	1900-01-08			Arlindo Armando	23			2		2	Furvela	0	4	1	0	0	0
3344	145	2003	4	21	2003-04-21	17	00:00:00	08:55:00		2004	Alberto Daniel	4			1		2	Furvela	1	0	0	0	0	0
3345	145	2003	4	21	2003-04-21	17	00:00:00	09:34:00		3205	Amelia Sainda	53			2		2	Furvela	1	0	0	0	0	0
3179	125	2003	4	21	2003-04-21	17	00:00:00	09:43:00		3167	Dercia Tucha	1	5		1		2	bovane	0	4	1	0	0	0
3181	125	2003	4	21	2003-04-21	17	00:00:00	10:01:00		83	Anita Seneta	31			2		2	jogo	1	0	0	0	0	0						control
3183	125	2003	4	21	2003-04-21	17	00:00:00	10:02:00		4011	Felizberto Alfredo	6			1		2	Furvela	0	3	1	1	0	0	0	0
3180	125	2003	4	21	2003-04-21	17	1900-01-10	1900-01-10		208	Nando Andre	16			1		2	jogo	0	0	0	1	0	3	0	0
3184	125	2003	4	22	2003-04-22	17	00:00:00	08:36:00		4012	Adelia Raul	17			2	37	2	Furvela	0	3	1	0	0	0
3185	125	2003	4	22	2003-04-22	17	00:00:00	09:01:00		4013	Neto Luis	27			1		2	matumbela
3171	124	2003	4	22	2003-04-22	17	00:00:00	09:02:00		3250	Simiao Raul	4	8		1		2	bovane	0	3	1	0	0	0
3172	124	2003	4	22	2003-04-22	17	00:00:00	09:03:00		2901	Laura Armando	1	7		2		2	jogo	0	3	1	0	3	0			hospital
3174	124	2003	4	22	2003-04-22	17	00:00:00	10:05:00		4015	Sonia Baptista	22			1		2	jogo
3178	124	2003	4	23	2003-04-23	17	00:00:00	08:04:00		3705	Claudia Mauricio	1	1		2		2	matumbela	0	4	1	0	0	0
3177	124	2003	4	23	2003-04-23	17	00:00:00	08:35:00		4017	Americo Sebastiao	26			1		2	Furvela	1	0	0	0	0	0
3164	123	2003	4	23	2003-04-23	17	00:00:00	09:02:00			Matilde Canhala			60	1		2	muengue	1	0	0	0	0	0
3168	123	2003	4	24	2003-04-24	17	00:00:00	08:01:00		4021	Ednercia A. Ventura	0	2		2		2	jogo	0	3	1	0	0	0
3167	123	2003	4	24	2003-04-24	17	00:00:00	08:04:00		4020	Emidio Bata	27			2		2	mapinhane	0	1	1	0	0	0
3157	122	2003	4	24	2003-04-24	17	00:00:00	08:55:00		23157	Rosalina Daniel	46			1		2	Furvela	1	0	0	0	0	0
3160	122	2003	4	24	2003-04-24	17	00:00:00	09:15:00		3785	Virginia Castro	6			2		2	Furvela	0	1	1	0	0	0
3148	121	2003	4	24	2003-04-24	17	00:00:00	10:01:00		4029	Amelia Elidio	6			1		2	matumbela	1	0	0	0	0	0			hospital
3147	121	2003	4	24	2003-04-24	17	1900-01-10	1900-01-10		1037	Gervasio Miguel	3			1		2	matumbela	0	3	1	0	0	0
3140	120	2003	4	25	2003-04-25	17	00:00:00	09:04:00		117	Benilde Francisco	13			2		2	Furvela
3141	120	2003	4	25	2003-04-25	17	00:00:00	09:48:00		4033	Carlolina Fernando	8			2	36	2	jogo	0	1	1	0	0	0
3133	119	2003	4	28	2003-04-28	18	00:00:00	08:28:00			Maria Alfredo	23			2		2	matumbela
3136	119	2003	4	28	2003-04-28	18	00:00:00	09:02:00		3792	Miguel Patricio	0	6		1	39.4	2	mahangue	0	5	1	0	0	0
3123	118	2003	4	28	2003-04-28	18	00:00:00	09:05:00			Malaquias Mario	22			2		2	jogo	0	1	1	0	0	0
3138	119	2003	4	28	2003-04-28	18	00:00:00	09:46:00		4038	Teresa Alberto	19			1		2	Furvela	1	0	0	0	0	0
3126	118	2003	4	28	2003-04-28	18	00:00:00	11:01:00		3142	Florentina Filipe	53			2		2	Furvela	1	0	0	0	0	0
3127	118	2003	4	28	2003-04-28	18	00:00:00	11:04:00			Zabiba Abdul			69	2	38.3	2	h massinga	1	0	0	0	0	0
3129	118	2003	4	28	2003-04-28	18	00:00:00	11:48:00		3334	Arsenio J.Pedro	0	3		2	38.8	2	balavala	0	5	1	0	0	0
3111	116	2003	4	29	2003-04-29	18	00:00:00	08:04:00		63	Teresa Lanicela	32			2		2	nharrumbo	0	1	1	0	0	0
3112	116	2003	4	29	2003-04-29	18	00:00:00	08:05:00			Felizmina Jacinto	10			2	36.8	2	bovane	1	0	0	0	0	0
3113	116	2003	4	29	2003-04-29	18	00:00:00	08:58:00		2214	Otilia Sarifa	1	6		2	40.2	2	Furvela	0	1	1	0	0	0
3120	117	2003	4	29	2003-04-29	18	00:00:00	10:01:00		133	Heriqueta Rafael	61			1		2	Furvela	1	0	0	0	0	0
3119	117	2003	4	29	2003-04-29	18	00:00:00	10:04:00		303	Cidalia R. Francisco	20			2		2	xidanga	1	0	0	0	0	0
3121	117	2003	4	29	2003-04-29	18	00:00:00	10:45:00		4041	Antonio Tomas	1	2		2		2	Furvela	0	4	1	0	0	0
3118	117	2003	4	29	2003-04-29	18	1900-01-10	1900-01-10		161	Bevinda Manuel	6			2		2	Furvela	0	1	1	0	0	0
3103	115	2003	4	30	2003-04-30	18	00:00:00	08:03:00			Angelica David			50	2		2	jogo	1	0	0	0	0	0
3106	115	2003	4	30	2003-04-30	18	00:00:00	08:04:00		3868	Mateus Miguel	26			2		2	xidanga	1	0	0	0	0	0
3107	115	2003	4	30	2003-04-30	18	00:00:00	09:28:00		137	Purfilia A. Ernesto	33			2		2	matumbela	1	0	0	0	0	0
3095	114	2003	4	30	2003-04-30	18	00:00:00	10:04:00		2268	Deniva A. Eduardo	1	8		1		2	Furvela	0	4	1	0	0	0
3094	114	2003	4	30	2003-04-30	18	00:00:00	10:35:00		4046	Rafael Antonio	0	4		2	37.1	2	jogo	0	3	1	0	0	0			Hospital
3098	114	2003	4	30	2003-04-30	18	00:00:00	11:08:00		4047	Mercia Abdul	1	6		1		2	jogo	0	3	1	0	0	0
3100	114	2003	4	30	2003-04-30	18	00:00:00	11:55:00		3740	Ronaldo Bento	4			1	36.8	2	jogo	0	1	1	1	0	0	0	0
3101	114	2003	4	30	2003-04-30	18	00:00:00	11:59:00		2199	Nina da Rosa	1	7		2		2	vilanculos	0	3	1	0	0	0
3085	113	2003	5	1	2003-05-01	18	00:00:00	08:01:00			Florencia Simiricio	35			2		2	Furvela	1	0	0	0	0	0
3086	113	2003	5	1	2003-05-01	18	00:00:00	08:18:00		4049	Rafael Bento	0	11		2		2	matumbela	1	0	0	0	0	0
3091	113	2003	5	2	2003-05-02	18	00:00:00	08:05:00		22	Suzana Mauricio	2	8		1		2	Furvela	0	3	1	0	0	0
3092	113	2003	5	2	2003-05-02	18	00:00:00	08:55:00		1669	Diogo Jordao	3	8		2	36.6	2	jogo	0	1	1	0	0	0
3066	112	2003	5	2	2003-05-02	18	00:00:00	10:15:00			Celso Sergio	1	5		2		2	jogo	0	4	1	0	0	0			hospital
3068	112	2003	5	2	2003-05-02	18	00:00:00	11:07:00		4065	Gilda Artur	10			2		2	muengue
3072	112	2003	5	5	2003-05-05	19	00:00:00	08:01:00		4058	Sonia Augusto	8			1		2	Furvela	0	1	1	0	0	0
3075	112	2003	5	5	2003-05-05	19	00:00:00	09:01:00		1718	Zefanias Simoes	15			2	36.8	2	Furvela	1	0	0	0	0	0
3076	112	2003	5	5	2003-05-05	19	00:00:00	09:28:00		4059	Adelvia Antonio	0	4		1		2	nharrumbo	0	1	1	0	0	0
3077	112	2003	5	5	2003-05-05	19	00:00:00	09:35:00		4060	Crimilda Ernesto	2	5		2		2	jogo	0	3	1	0	0	0
3079	112	2003	5	5	2003-05-05	19	00:00:00	09:45:00		4062	Irene Amosse			60	2		2	Furvela	1	0	0	0	0	0
3080	112	2003	5	5	2003-05-05	19	00:00:00	09:49:00		4063	Orlando Francisco	0	2		1	36.2	2	xidanga	0	1	1	0	3	0
3081	112	2003	5	5	2003-05-05	19	00:00:00	10:13:00		2079	Eugenia Manuel	3	6		2	37.9	2	jogo	0	4	1	0	0	0
3084	112	2003	5	5	2003-05-05	19	00:00:00	10:25:00		3027	Graca Joao	21			2		2	Furvela	0	0	1	0	0	1			hospital
3029	111	2003	5	6	2003-05-06	19	00:00:00	08:03:00		20	Felizarda Fecela	45			2		2	jogo	0	0	0	1	0	0	0	0
3031	111	2003	5	6	2003-05-06	19	00:00:00	08:48:00		4066	Rosa Jorge	21			1		2	matumbela	0	4	1	0	0	0
3032	111	2003	5	6	2003-05-06	19	00:00:00	09:04:00		4067	Rosa Jose	34			2	36.1	2	Furvela	1	0	0	0	0	0
3036	111	2003	5	6	2003-05-06	19	00:00:00	09:33:00		4072	Oscar Manuel	0	2		2	37.9	2	jogo	1	0	0	0	0	0
3037	111	2003	5	6	2003-05-06	19	00:00:00	09:45:00		3042	Laura Baptista	1			2	39.7	2	jogo	0	5	1	0	0	0
3040	111	2003	5	6	2003-05-06	19	00:00:00	10:15:00		1006	Sonia Timoteo	1	11		2		2	Furvela	0	5	1	0	0	0
3041	111	2003	5	6	2003-05-06	19	00:00:00	10:55:00		1	Nito Arnaldo	3			1	38.7	2	Furvela	0	1	1	0	0	0
3042	111	2003	5	7	2003-05-07	19	00:00:00	08:03:00		1638	Palmira Daniel	41			2		2	Furvela
3044	111	2003	5	7	2003-05-07	19	00:00:00	08:58:00		4073	Francisco Alexandre	2			1		2	Furvela	0	3	1	0	0	0
3046	111	2003	5	7	2003-05-07	19	00:00:00	09:16:00			Edna Victorino	3	6		1	37.2	2	jogo	1	0	0	0	0	0
3048	111	2003	5	7	2003-05-07	19	00:00:00	09:53:00		4075	Acussena Jaime	20			2		2	Furvela	1	0	0	0	0	0
3050	111	2003	5	7	2003-05-07	19	00:00:00	10:01:00		3153	Valdimiro Sara	1	1		2		2	jogo	0	3	0	3	0	0	0	0
3054	111	2003	5	7	2003-05-07	19	00:00:00	10:03:00		304	Marcia R.Francisco	19			2		2	Furvela	0	0	0	1	0	0	0	0
3049	111	2003	5	7	2003-05-07	19	00:00:00	10:05:00		3539	Jose Antonio	0	8		1	39.4	2	jogo	0	3	1	0	0	0
3051	111	2003	5	7	2003-05-07	19	00:00:00	10:15:00		3667	Alcina Sara	1	1		1		2	matumbela	0	3	1	0	0	0
3052	111	2003	5	7	2003-05-07	19	00:00:00	10:18:00		3801	Sara Afonso	23			2		2	Furvela	0	3	1	0	0	0
3057	111	2003	5	7	2003-05-07	19	00:00:00	10:45:00		1058	Ednercio Isabel	11			2		2	xidanga	1	0	0	0	0	0
3058	111	2003	5	7	2003-05-07	19	00:00:00	10:53:00		259	Candida Roberto	24			1		2	Furvela	1	0	0	0	0	0
3005	110	2003	5	7	2003-05-07	19	00:00:00	11:05:00		4076	Virginia Azarias	27			2		2	Furvela	1	0	0	0	0	0
3045	111	2003	5	7	2003-05-07	19	1900-01-09	1900-01-09		4074	Rosa Jose	25			2		2	jogo
3006	110	2003	5	8	2003-05-08	19	00:00:00	08:03:00		2088	Simplicio Jossai	5			1		2	Furvela	1	0	0	0	0	0
3007	110	2003	5	8	2003-05-08	19	00:00:00	08:35:00		23307	Albertina Oficio	35			2		2	vis.furvela
3009	110	2003	5	8	2003-05-08	19	00:00:00	08:44:00			Alfa da Oliveira	17			2		2	Furvela	1	0	0	0	0	0
3010	110	2003	5	8	2003-05-08	19	00:00:00	08:54:00		4077	Rosalia Fortunato	1	8		2	39.4	2	Furvela	0	4	1	0	0	0
3014	110	2003	5	8	2003-05-08	19	00:00:00	09:05:00		2150	Custodio Sergio	1	8		2	38.6	2	jogo	0	1	1	0	0	0
3012	110	2003	5	8	2003-05-08	19	00:00:00	09:06:00			Ernesto Cossa	24			1		2	Furvela	1	0	0	0	0	0
3013	110	2003	5	8	2003-05-08	19	00:00:00	09:45:00		3327	Marta Armando	1	9		2		2	Furvela	0	3	1	0	0	0
3015	110	2003	5	8	2003-05-08	19	00:00:00	09:55:00		4078	Ernesto Arnaldo	11			1		2	Furvela	1	0	0	0	0	0
3019	110	2003	5	9	2003-05-09	19	00:00:00	07:53:00		4080	Olga Fernando	28			2		2	Furvela	1	0	0	0	0	0
3022	110	2003	5	9	2003-05-09	19	00:00:00	08:05:00		4082	Maria Carlos	32			2		2	nhalivala	1	0	0	0	0	0
3023	110	2003	5	9	2003-05-09	19	00:00:00	08:55:00		4037	Estevao Rafael	0	4		2	39.5	2	bovane	0	3	1	0	0	0
3026	110	2003	5	9	2003-05-09	19	00:00:00	09:02:00			Clarinda Francisco	13			2		2	jogo	1	0	0	0	0	0
3025	110	2003	5	9	2003-05-09	19	00:00:00	09:15:00		266	Regina Andre	3			1		2	Furvela	0	3	1	0	0	0
3020	110	2003	5	9	2003-05-09	19	1900-01-08	1900-01-08		4081	Deolinda Pedro	1	4		1		2	Furvela	0	5	1	0	0	0
2948	108	2003	5	12	2003-05-12	20	00:00:00	07:55:00		230	Isaura Francisco	43			1		2	m`bene	1	0	0	0	0	0			hospital
2954	108	2003	5	12	2003-05-12	20	00:00:00	09:25:00			Adelina Gildo	1	5		1		2	muengue	0	3	1	0	0	0
2956	108	2003	5	12	2003-05-12	20	00:00:00	09:35:00		4052	Bartilale Januario	9			2		2	Furvela	1	0	0	0	0	0
2960	108	2003	5	12	2003-05-12	20	00:00:00	09:58:00		4088	Luisa Joao	4			2		2	Furvela	0	4	1	0	0	0
2964	108	2003	5	12	2003-05-12	20	00:00:00	10:02:00			Paulo Joao	21			1		2	Furvela	0	0	0	0	1	0
2967	108	2003	5	12	2003-05-12	20	00:00:00	10:04:00		3543	Agostinho Bernardo	1	1		1		2	Furvela	0	3	1	0	0	0
2949	108	2003	5	12	2003-05-12	20	1900-01-08	1900-01-08		4085	Pascoal Bata	59			1		2	Furvela	0	3	1	0	0	0
2953	108	2003	5	12	2003-05-12	20	1900-01-09	1900-01-09			Paito Feliciano	8			2		2	Furvela	1	0	0	0	0	0
2971	108	2003	5	13	2003-05-13	20	00:00:00	09:04:00		4093	Lurdes Alexandre			35	2		2	muengue	0	1	1	0	0	0
2972	108	2003	5	13	2003-05-13	20	00:00:00	10:02:00		1270	Jose Joaquim	33			2		2	Furvela	1	0	0	0	0	0
2973	108	2003	5	13	2003-05-13	20	00:00:00	10:27:00		4094	Mariana Augusto	0	4		1		2	Furvela	0	1	1	0	0	0
2976	109	2003	5	13	2003-05-13	20	00:00:00	11:04:00		4097	Ernesto Xavier	16			2		2	jogo
2978	109	2003	5	14	2003-05-14	20	00:00:00	08:05:00		4099	Mae: Felizarda Miguel	0	9		1		2	xidanga	0	4	1	0	0	0
2982	109	2003	5	14	2003-05-14	20	00:00:00	09:03:00		4100	Andre Augusto	0	9		1	36.6	2	jogo	0	3	1	1	0	0	0	0
2983	109	2003	5	14	2003-05-14	20	00:00:00	09:35:00		3642	Laura Baptista	1	1		1		2	Furvela	1	0	0	0	0	0
2985	109	2003	5	14	2003-05-14	20	00:00:00	10:03:00		839	Ana Macassa	36			2		2	Furvela	1	0	0	0	0	0
2984	109	2003	5	14	2003-05-14	20	00:00:00	10:22:00			Jacinto Joao	24			2		2	matumbela	0	3	1	0	0	0
2977	109	2003	5	14	2003-05-14	20	1900-01-08	1900-01-08		4098	Joaquim Vicente	32			2		2	Furvela	1	0	0	0	0	0
2989	109	2003	5	15	2003-05-15	20	00:00:00	08:04:00		4102	Marcelino Alfeu	0	8		1		2	matumbela	1	0	0	0	0	0
2990	109	2003	5	15	2003-05-15	20	00:00:00	09:14:00			Elidio Alberto	0	10		2		2	Furvela	0	3	1	0	0	0
2991	109	2003	5	15	2003-05-15	20	00:00:00	09:38:00		4079	Marlena Miguel	0	4		2		2	Furvela	0	5	1	0	0	0
2993	109	2003	5	15	2003-05-15	20	00:00:00	11:11:00		3805	Vasco Antonio	4			1		2	jogo	0	1	0	3	0	0	0	0
2995	109	2003	5	16	2003-05-16	20	00:00:00	08:08:00		3319	Naldo Antonio	2	1		2		2	matumbela	0	1	1	0	0	0
2996	109	2003	5	16	2003-05-16	20	00:00:00	09:22:00			Marlina Facitela			50	2		2	jogo
2999	109	2003	5	19	2003-05-19	21	00:00:00	08:35:00		4105	Victoria Jorge			50	2		2	Furvela
3004	109	2003	5	19	2003-05-19	21	00:00:00	09:02:00		3875	Nilsa Rodrigues	1	3		1		2	jogo	0	1	1	0	0	0
2926	107	2003	5	19	2003-05-19	21	00:00:00	09:15:00			Ermenegildo Miguel	0	9		1		2	matumbela	0	5	1	0	0	0
2925	107	2003	5	19	2003-05-19	21	00:00:00	09:55:00		4083	Regina Ngovene	23			1		2	jogo	0	1	1	1	0	0	0	0
2927	107	2003	5	19	2003-05-19	21	00:00:00	10:18:00		3674	Julia Armando	0	7		2	37.1	2	Furvela	0	5	1	0	0	0
2928	107	2003	5	19	2003-05-19	21	00:00:00	10:38:00		4108	Sonia Armando	19			2		2	Furvela	0	1	1	0	0	0						resistente
2929	107	2003	5	19	2003-05-19	21	00:00:00	11:05:00			Albertina Carlos	0	9		2		2	jogo	0	3	1	0	0	0			hospital
2930	107	2003	5	19	2003-05-19	21	00:00:00	13:03:00		4109	Jose Ricardo	0	5		1		2	muengue	1	0	0	0	0	0
3001	109	2003	5	19	2003-05-19	21	1900-01-09	1900-01-09			Alberto Luis	18			2		2	Furvela	1	0	0	0	0	0
2923	107	2003	5	19	2003-05-19	21				4015	Felizberto Alfredo	6			1		2	Furvela	0	0	0	1	0	0	0	0
2931	107	2003	5	20	2003-05-20	21	00:00:00	07:58:00		4110	Deny Gil	1	4		2		2	jogo	0	3	1	0	0	0
2933	107	2003	5	20	2003-05-20	21	00:00:00	08:01:00		4111	Telma Simiao			14	1	36.6	2	jogo	0	1	1	0	0	0
2934	107	2003	5	20	2003-05-20	21	00:00:00	08:28:00			Arnaldo Alexandre			65	2	37.7	2	nhalivala	0	0	0	1	0	0	0	0
2939	107	2003	5	20	2003-05-20	21	00:00:00	09:03:00		3005	Edicia Alfiado	1	1		1		2	balavala
2941	107	2003	5	20	2003-05-20	21	00:00:00	09:04:00		4053	Osvalda da Graca	20			1		2	jogo	1	0	0	0	0	0
2940	107	2003	5	20	2003-05-20	21	00:00:00	09:35:00		4090	Iolanda Alima	14			2		2	Furvela	1	0	0	0	0	0
2942	107	2003	5	20	2003-05-20	21	00:00:00	09:48:00		79	Laura Seneta	54			1		2	Furvela	1	0	0	0	0	0
2946	107	2003	5	20	2003-05-20	21	00:00:00	12:15:00			Aderito Joao	1	1		1	38.8	2	jogo	0	4	1	0	0	0
2898	106	2003	5	21	2003-05-21	21	00:00:00	08:05:00		203	Samaria Catingue	63			1		2	matumbela	0	4	1	0	0	0
2896	106	2003	5	21	2003-05-21	21	00:00:00	08:18:00		4113	Emilia Macavane			54	1	35.9	2	Furvela	1	0	0	0	0	0
2899	106	2003	5	21	2003-05-21	21	00:00:00	08:55:00		4115	Narciso Joaquim	26			2		2	Furvela	0	3	1	0	0	0
2902	106	2003	5	21	2003-05-21	21	00:00:00	10:02:00		919	Teresa Rafael	55			2		2	Furvela	0	1	1	0	0	0
2905	106	2003	5	21	2003-05-21	21	00:00:00	10:05:00		2364	Alberto Nelson	1	6		2		2	jogo	0	0	0	0	3	0
2904	106	2003	5	21	2003-05-21	21	00:00:00	10:26:00		4118	Felizarda Jorge	43			2		2	Furvela
2907	106	2003	5	22	2003-05-22	21	00:00:00	08:05:00		3143	Joaneta Manuel			50	2		2	Furvela
2912	106	2003	5	22	2003-05-22	21	00:00:00	09:05:00		4120	Lidia Francisco	23			2		2	jogo	0	3	1	0	0	0
2908	106	2003	5	22	2003-05-22	21	00:00:00	09:18:00		4119	Joana Luis	0	8		2	37.1	2	Furvela	0	4	1	0	0	0
2910	106	2003	5	22	2003-05-22	21	00:00:00	09:26:00		453	Diocencia Alexandre	3	7		2		2	Furvela	0	3	1	0	0	0
2911	106	2003	5	22	2003-05-22	21	00:00:00	09:45:00			Renalda Jacinto	14			1		2	Furvela	0	1	1	0	0	0
2913	106	2003	5	22	2003-05-22	21	00:00:00	09:58:00			Nercia Ricardo	10			2		2	Furvela	1	0	0	0	0	0
2915	106	2003	5	22	2003-05-22	21	00:00:00	10:04:00		217	Paulo Binguane	40			1		2	jogo	0	0	1	0	0	1
2914	106	2003	5	22	2003-05-22	21	1900-01-10	1900-01-10		4121	Bores Tausene	23			2		2	jogo	1	0	0	0	0	0
2919	106	2003	5	23	2003-05-23	21	00:00:00	08:55:00		4124	Fileria Gonsalves	0	9		2	36.8	2	mapinhane	1	0	0	0	0	0
2867	105	2003	5	23	2003-05-23	21	00:00:00	10:38:00		4127	Macilia Alexandre	3			2		2	vilanculos	0	3	1	0	0	0	170	509
2868	105	2003	5	23	2003-05-23	21	00:00:00	10:53:00		4128	Carlos Constantino	0	8		1	38.8	2	mbatane	0	4	1	0	0	0
2870	105	2003	5	26	2003-05-26	22	00:00:00	07:45:00		4129	Marta Fernando			50	2		2	jogo	1	0	0	0	0	0
2871	105	2003	5	26	2003-05-26	22	00:00:00	08:02:00		4130	Juliao Fernando	65			2		2	Furvela	0	1	1	0	0	0
2872	105	2003	5	26	2003-05-26	22	00:00:00	08:25:00		384	Dercia Armando	5			2	37	2	Furvela	1	0	0	0	0	0
2874	105	2003	5	26	2003-05-26	22	00:00:00	09:16:00		1650	Angelica Adalaide	15			2		2	Furvela
2877	105	2003	5	26	2003-05-26	22	00:00:00	10:18:00		4131	Ananias Fernando	3			1	36.5	2	jogo	1	0	0	0	0	0
2878	105	2003	5	26	2003-05-26	22	00:00:00	10:35:00		4132	Domingos Antonio	22			2		2	bovane	1	0	0	0	0	0
2880	105	2003	5	26	2003-05-26	22	00:00:00	11:55:00		1628	Aida Alexandre				2		2	Furvela	1	0	0	0	0	0
2882	105	2003	5	27	2003-05-27	22	00:00:00	08:08:00		4133	Joaquina Manuel			50	2	36.1	2	jogo	1	0	0	0	0	0
2885	105	2003	5	27	2003-05-27	22	00:00:00	08:15:00		4135	Adelso Severiano	14			1		2	Furvela	1	0	0	0	0	0
2888	105	2003	5	27	2003-05-27	22	00:00:00	09:05:00		4138	Clara Jose	3			2	36	2	cambine
2887	105	2003	5	27	2003-05-27	22	00:00:00	09:48:00		4137	Neulite Elite	4			1		2	nharrumbo
2889	105	2003	5	27	2003-05-27	22	00:00:00	09:55:00		582	Lucia Antonio	26			2		2	muengue	0	1	1	0	0	0
2890	105	2003	5	27	2003-05-27	22	00:00:00	09:57:00		4139	Catarina Bernardo	25			2		2	Furvela	1	0	0	0	0	0
2893	105	2003	5	27	2003-05-27	22	00:00:00	10:01:00		4161	Abilio Amorane	14			1		2	Furvela	1	0	0	0	0	0
2892	105	2003	5	27	2003-05-27	22	00:00:00	10:05:00		4060	Joaquina Jorge			50	2		2	Furvela	1	0	0	0	0	0
2835	104	2003	5	28	2003-05-28	22	00:00:00	09:01:00		383	Isabel Armando	4			2		2	Furvela	1	0	0	0	0	0
2839	104	2003	5	28	2003-05-28	22	00:00:00	09:03:00		3767	Isabel Fernando	0	7		2		2	matumbela	0	5	1	0	0	0
2836	104	2003	5	28	2003-05-28	22	00:00:00	09:22:00		4142	Armindo Armando	6			1		2	Furvela	0	1	1	0	0	0
2837	104	2003	5	28	2003-05-28	22	00:00:00	09:25:00		4143	Amelia Jorge	17			1		2	Furvela
2840	104	2003	5	28	2003-05-28	22	00:00:00	09:35:00			Anselmo Herinque	2			1		2	jogo	0	1	1	0	0	0
2841	104	2003	5	28	2003-05-28	22	1900-01-10	1900-01-10			Ana Simoes	17			2	37	2	Furvela	0	4	1	0	0	0
2845	104	2003	5	29	2003-05-29	22	00:00:00	07:05:00			Gracinda Eduardo	27			1		2	jogo	0	4	1	0	0	0
2844	104	2003	5	29	2003-05-29	22	00:00:00	07:48:00		2076	Mirsa da Marta	17			2	37.9	2	Furvela	0	1	1	0	0	0
2848	104	2003	5	29	2003-05-29	22	00:00:00	08:53:00		1006	Sonia Timoteo	1	11		1		2	Furvela	1	0	0	0	0	0
2854	104	2003	5	29	2003-05-29	22	00:00:00	09:05:00		4146	Sergio Francsco	2	7		2	37.4	2	Furvela	0	3	1	0	1	1	389	531
2851	104	2003	5	29	2003-05-29	22	00:00:00	09:15:00		3192	Abcina Jose	1	2		2		2	matumbela	0	5	1	0	0	0
2859	104	2003	5	29	2003-05-29	22	00:00:00	10:01:00		4148	Maria Lourenco	0	8		2		2	Furvela	0	5	1	0	0	0
2864	104	2003	5	29	2003-05-29	22	00:00:00	10:35:00		4150	Dulce Francisco	19			2		2	matumbela	1	0	0	0	0	0
2818	103	2003	5	29	2003-05-29	22	00:00:00	10:42:00			Belinha Naichela	36			2		2	Furvela	0	1	1	0	0	0
2823	103	2003	5	29	2003-05-29	22	00:00:00	11:05:00			Horacio Sebastiao	45			2		2	jogo	1	0	0	0	0	0
2819	103	2003	5	29	2003-05-29	22	00:00:00	11:17:00		448	Alberto Jossai	3	2		1	37.6	2	jogo	0	5	1	0	0	0
2820	103	2003	5	29	2003-05-29	22	00:00:00	11:27:00		3936	Arao Alberto	3			1	37.9	2	matumbela	0	5	1	0	0	0
2821	103	2003	5	29	2003-05-29	22	00:00:00	11:32:00		4152	Justino Gustavo	0	11		2		2	lihuwa	0	1	1	0	0	0
2828	103	2003	5	30	2003-05-30	22	00:00:00	08:03:00		4157	Luisa Alfredo			51	2		2	jogo	0	3	1	0	0	0
2827	103	2003	5	30	2003-05-30	22	00:00:00	08:25:00		4156	Samaria Nhiwane			50	2		2	Furvela	0	0	0	1	0	0	0	0						TR
2829	103	2003	5	30	2003-05-30	22	00:00:00	08:45:00			Constantino Artur	23			1		2	Furvela	1	0	0	0	0	0
2825	103	2003	5	30	2003-05-30	22	1900-01-08	1900-01-08		4154	Minoca Augusto	13			2		2	matumbela	0	1	1	1	0	0	0	0
2832	103	2003	5	30	2003-05-30	22	1900-01-10	1900-01-10		3904	Vinadio S. Roberto	1	5		1		2	Furvela	0	3	1	0	0	0
2793	102	2003	6	2	2003-06-02	23	00:00:00	10:01:00			Joao Fernando	26			2		2	Furvela	1	0	0	0	0	0
2792	102	2003	6	2	2003-06-02	23	00:00:00	10:55:00			Aderito Joao	1	1		2		2	nharrumbo	0	3	1	0	0	0
2796	102	2003	6	2	2003-06-02	23	00:00:00	11:25:00		4162	Evidencio Victorino	0	6		1	37	2	jogo	0	5	1	0	0	0
2798	102	2003	6	3	2003-06-03	23	00:00:00	08:14:00		4164	Coragio Rogerio	7			1		2	matumbela	0	3	1	0	0	0
2799	102	2003	6	3	2003-06-03	23	00:00:00	08:16:00		4165	Helena Jorge	24			2		2	Furvela	0	3	1	0	0	0
2801	102	2003	6	3	2003-06-03	23	00:00:00	08:44:00		210	Ricardo Mario	10			2		2	Furvela	1	0	0	0	0	0
2804	102	2003	6	3	2003-06-03	23	00:00:00	09:42:00		4167	Raimundo Jose	26			1		2	Furvela	1	0	0	0	0	0
2806	102	2003	6	3	2003-06-03	23	00:00:00	11:02:00		3842	Laura Baptista	10	1		2	38.9	2	Furvela	0	3	1	0	0	0
2809	102	2003	6	4	2003-06-04	23	00:00:00	08:22:00		4169	Zaida Ernesto	22			2		2	Furvela	0	3	1	0	0	0
2810	102	2003	6	4	2003-06-04	23	00:00:00	08:47:00		468	Ivone Bejamim	15			1		2		0	3	1	0	0	0
2814	102	2003	6	4	2003-06-04	23	00:00:00	09:05:00		3889	Esmenia Daniel	0	5		2	36.9	2	Furvela	0	4	1	0	0	0
2812	102	2003	6	4	2003-06-04	23	00:00:00	09:25:00		1340	Ana Moizes	73			2		2	Furvela	1	0	0	0	0	0
2816	102	2003	6	4	2003-06-04	23	00:00:00	10:54:00			Maria Pascoal			9	2		2	matumbela	1	0	0	0	0	0
2760	101	2003	6	5	2003-06-05	23	00:00:00	07:55:00		379	Antonio Laice	80			1		2	Furvela	1	0	0	0	0	0
2762	101	2003	6	5	2003-06-05	23	00:00:00	08:02:00		4173	Isabel Joao			55	2		2	jogo	1	0	0	0	0	0
2764	101	2003	6	5	2003-06-05	23	00:00:00	08:03:00		4175	Victoria Ernesto			55	2		2	jogo	1	0	0	0	0	0
2766	101	2003	6	5	2003-06-05	23	00:00:00	08:45:00		4176	Maria Ferao	77			1		2	Furvela
2768	101	2003	6	5	2003-06-05	23	00:00:00	10:35:00		1187	Gildo Francisco	16			1		2	Furvela	0	1	1	0	0	0
2769	101	2003	6	5	2003-06-05	23	00:00:00	10:54:00		453	Diocencia Alexandre	3	5		1		2	Furvela	0	3	1	0	0	0						control
2770	101	2003	6	5	2003-06-05	23	00:00:00	11:01:00		3333	Alzira Jaime	0	11		1	38	2	Furvela	0	3	1	0	3	0			hospital
2772	101	2003	6	5	2003-06-05	23	00:00:00	11:33:00		4177	Cacilda Fernando	0	3		2	38.2	2	jogo	0	5	1	0	0	0
2773	101	2003	6	5	2003-06-05	23	00:00:00	12:01:00		4178	Izaura de Clesia	1	6		1	38.2	2	Furvela	0	3	1	0	0	0
2779	101	2003	6	6	2003-06-06	23	00:00:00	08:05:00			Arlindo Antonio	1	11		2	36	2	jogo	0	3	1	0	0	0
2776	101	2003	6	6	2003-06-06	23	00:00:00	08:25:00		1102	Luisa Armando	33			2		2	matumbela	1	0	0	0	0	0
2777	101	2003	6	6	2003-06-06	23	00:00:00	08:32:00		4181	Crimilda Jacinto	0	2		1	36.8	2	balavala	0	1	1	0	0	0
2730	100	2003	6	9	2003-06-09	24	00:00:00	08:04:00		4186	Albino Pascoal	7			1		2	Furvela	1	0	0	0	0	0
2787	101	2003	6	9	2003-06-09	24	00:00:00	08:27:00		620	Jose Ricardo	14			1		2	maxixe	1	0	0	0	0	0
2728	100	2003	6	9	2003-06-09	24	00:00:00	08:32:00		23337	Ana Armando	22			1		2	matumbela	0	4	1	0	0	0
2733	100	2003	6	9	2003-06-09	24	00:00:00	09:02:00			Marta Ernesto	1	4		2	37.3	2	Furvela	0	4	1	0	0	0
2736	100	2003	6	9	2003-06-09	24	00:00:00	10:07:00		3888	Armenia Jose	0	5		1		2	jogo	0	3	1	0	0	0
2739	100	2003	6	9	2003-06-09	24	00:00:00	11:14:00		3900	Americo Joaquim	1			1	37.1	2	matumbela	0	3	1	0	0	0
2744	100	2003	6	10	2003-06-10	24	00:00:00	08:02:00		4194	Figencia Pedro	20			2		2	Furvela
2747	100	2003	6	10	2003-06-10	24	00:00:00	08:04:00			Elisa G. Sebastiao	1	8		2	38.6	2	Furvela	0	4	1	0	0	0
2742	100	2003	6	10	2003-06-10	24	00:00:00	08:05:00			Fernando Manuel	0	6		1		2	chibaela	0	3	1	0	0	0
2743	100	2003	6	10	2003-06-10	24	00:00:00	08:08:00		4193	Lucia Fernando	23			2		2	jogo	1	0	0	0	0	0
2745	100	2003	6	10	2003-06-10	24	00:00:00	08:28:00		4195	Joaquim Ernesto	20			2		2	matumbela
2746	100	2003	6	10	2003-06-10	24	00:00:00	08:32:00		4110	Deny Gil	1	5		2	36.8	2	matumbela	0	4	1	0	0	0
2749	100	2003	6	10	2003-06-10	24	00:00:00	08:58:00			Gracinda Lucas	2	4		1		2	Furvela	0	3	1	0	0	0
2753	100	2003	6	10	2003-06-10	24	00:00:00	09:05:00			Ramos Andre	1	9		2	37.7	2	Furvela	0	4	1	0	0	0
2752	100	2003	6	10	2003-06-10	24	00:00:00	09:45:00		4198	Luisa Leonardo			30	2		2	matumbela
2754	100	2003	6	10	2003-06-10	24	00:00:00	09:55:00		4199	Felizarda Muando			45	2	36.4	2	jogo	0	1	1	0	0	0
2697	99	2003	6	10	2003-06-10	24	00:00:00	10:02:00		1639	Preciosa Jose	12			1		2	Furvela	1	0	0	0	0	0
2698	99	2003	6	10	2003-06-10	24	00:00:00	10:25:00		4200	Julio Rafael	7			1	38.4	2	nharrumbo	1	0	0	0	0	0
2704	99	2003	6	11	2003-06-11	24	00:00:00	08:01:00		4202	Teresa Samuel	33			2		2	Furvela	1	0	0	0	0	0
2707	99	2003	6	11	2003-06-11	24	00:00:00	08:02:00		4204	Esperanca Francsco			40	2		2	Furvela	1	0	0	0	0	0
2703	99	2003	6	11	2003-06-11	24	00:00:00	08:08:00		4201	Marta Samuel	5			2		2	matumbela	0	3	1	0	0	0
2708	99	2003	6	11	2003-06-11	24	00:00:00	08:21:00		4205	vanil da Sarifa	2	4		2	37.3	2	Furvela	0	5	1	0	0	0
2706	99	2003	6	11	2003-06-11	24	00:00:00	08:22:00		4203	Fidelia Juliao	1	1		1	38.2	2	matumbela	0	4	1	0	0	0
2711	99	2003	6	11	2003-06-11	24	00:00:00	09:36:00			Amelia Sabao			50	2		2	jogo	0	1	1	0	0	0						resistente
2715	99	2003	6	11	2003-06-11	24	00:00:00	09:55:00		4017	Rita Daniel	5			2		2	jogo	0	1	1	0	0	0
2717	99	2003	6	11	2003-06-11	24	00:00:00	10:05:00		4211	Helena Elias	23			2		2	Furvela
2718	99	2003	6	11	2003-06-11	24	00:00:00	10:25:00		3649	Helio da Beatriz	0	10		1	36.9	2	jogo	1	0	0	0	0	0
2721	99	2003	6	11	2003-06-11	24	00:00:00	11:02:00		263	Clarencia Joaquim	14			2		2	Furvela
2716	99	2003	6	11	2003-06-11	24	1900-01-10	1900-01-10		4210	Miranda E.Elias	7			2		2	jogo	1	0	0	0	0	0
2722	99	2003	6	12	2003-06-12	24	00:00:00	08:01:00			Armija Meleco			50	2		2	jogo	0	3	1	0	0	0
2724	99	2003	6	12	2003-06-12	24	00:00:00	08:25:00		4212	Graca Raul	8			1	37.2	2	Furvela	1	0	0	0	0	0
2726	99	2003	6	12	2003-06-12	24	00:00:00	08:55:00		3574	Lina Borge	2	5		2		2	matumbela	0	4	1	0	0	0
2636	97	2003	6	12	2003-06-12	24	00:00:00	09:04:00		4101	Maria Virgilio	0	4		1	38.4	2	balavala	1	0	0	0	0	0
2635	97	2003	6	12	2003-06-12	24	00:00:00	09:35:00		4213	Julia Ricardo	21			2		2	jogo
2637	97	2003	6	12	2003-06-12	24	00:00:00	09:55:00		4214	Maria Eduardo	0	2		2	36.1	2	matumbela	0	3	1	0	0	0
2638	97	2003	6	12	2003-06-12	24	00:00:00	10:02:00		4046	Rafael Antonio	0	6		1	38.5	2	Furvela	0	3	1	0	0	0
2640	97	2003	6	12	2003-06-12	24	00:00:00	10:42:00			Dirce Eduardo	3			2	37.8	2	Furvela	0	5	1	0	0	0
2642	97	2003	6	12	2003-06-12	24	00:00:00	11:03:00		4216	Domingos Rodrigues	3	6		2	35.8	2	Furvela	0	3	1	0	0	0
2645	97	2003	6	12	2003-06-12	24	00:00:00	11:05:00		4079	Marcelina Miguel	0	4		2	38.9	2	balavala	0	4	1	0	0	0
2643	97	2003	6	12	2003-06-12	24	00:00:00	11:35:00		4217	Helena Chipende	42			2		2	Furvela	1	0	0	0	0	0
2644	97	2003	6	12	2003-06-12	24	00:00:00	11:38:00		4150	Dulce Francisco	19			1		2	Furvela	0	1	1	0	0	0
2646	97	2003	6	13	2003-06-13	24	00:00:00	08:15:00		326	Raimo Zacarias	61			1		2	Furvela	0	1	1	0	0	0
2648	97	2003	6	13	2003-06-13	24	00:00:00	09:05:00		4014	Inocencia Francisco	1	3		2		2	bovane	0	5	0	3	0	1	0	0
2649	97	2003	6	13	2003-06-13	24	00:00:00	09:55:00		3390	Edna Castigo	0	8		2	39.1	2	matumbela	0	3	1	0	0	0
2652	97	2003	6	13	2003-06-13	24	00:00:00	10:36:00		4219	Joana Uachisso			50	2		2	mbatane	1	0	0	0	0	0
2653	97	2003	6	13	2003-06-13	24	00:00:00	10:48:00			Nuro Miguel	0	6		1	38	2	Furvela	0	4	1	0	0	0
2658	97	2003	6	16	2003-06-16	25	00:00:00	08:36:00		4221	Otildo C. Jorge	0	6		1		2	jogo	0	3	1	0	0	0
2659	97	2003	6	16	2003-06-16	25	00:00:00	08:42:00		4222	Armando Manhice	59			2		2	Matumbela	1	0	0	0	0	0
2662	97	2003	6	16	2003-06-16	25	00:00:00	09:04:00		1707	Saquina Ussene	21			2		2	nhalivala	1	0	0	0	0	0
2660	97	2003	6	16	2003-06-16	25	00:00:00	09:25:00		4223	Samito Arbanoso	4			1		2	jogo	1	0	0	0	0	0
2663	97	2003	6	16	2003-06-16	25	00:00:00	09:53:00		1688	Armando Jose	0	5		1	36.8	2	bovane	0	4	1	0	0	0
2668	98	2003	6	16	2003-06-16	25	00:00:00	10:04:00			Graca Eduardo	37			2		2	matumbela	1	0	0	0	0	0
2666	98	2003	6	16	2003-06-16	25	00:00:00	10:15:00			Chico Tomas	23			2		2	Furvela	0	3	1	0	0	0
2669	98	2003	6	16	2003-06-16	25	00:00:00	10:48:00		292	Luis Francisco	25			2		2	Furvela	1	0	0	0	0	0
2670	98	2003	6	16	2003-06-16	25	00:00:00	11:01:00		3453	Edson Constantino	1	2		1	37.9	2	Furvela	0	3	1	0	0	0
2671	98	2003	6	16	2003-06-16	25	00:00:00	11:02:00		4225	Elvio Antonio	0	2		2		2	jogo	0	3	1	0	0	0
2674	98	2003	6	17	2003-06-17	25	00:00:00	08:56:00		2008	Albertina Fernando	33			1		2	balavala	0	1	1	0	0	0
2679	98	2003	6	17	2003-06-17	25	00:00:00	10:38:00		227	Afonso Andre	16			1		2	jogo	0	1	1	0	0	0			hospital
2680	98	2003	6	17	2003-06-17	25	00:00:00	10:56:00		3767	Isabel Fernando	0	8		2	37	2	matumbela	0	4	1	0	0	0
2682	98	2003	6	17	2003-06-17	25	00:00:00	11:03:00		59	Teresa Jotamo	36			2		2	Furvela	0	1	1	0	0	0
2672	98	2003	6	17	2003-06-17	25	1900-01-08	1900-01-08		3070	Joaquina Armando	1	3		2	36.1	2	jogo	0	4	1	0	0	0
2675	98	2003	6	17	2003-06-17	25	1900-01-09	1900-01-09		4227	Dercio Tomas	6			1		2	muengue	1	0	0	0	0	0
2683	98	2003	6	18	2003-06-18	25	00:00:00	07:05:00			David Manuel	21			2		2	Furvela
2684	98	2003	6	18	2003-06-18	25	00:00:00	08:45:00		4230	Maria Antonio			45	2		2	Furvela	0	1	1	0	0	0
2687	98	2003	6	18	2003-06-18	25	00:00:00	09:03:00		23167	Heldo Jeremias	1	7		2		2	Furvela	0	4	1	0	0	0
2688	98	2003	6	18	2003-06-18	25	00:00:00	09:38:00		4231	Angelina Vasco	17			2		2	nhabundo
2692	98	2003	6	18	2003-06-18	25	00:00:00	10:03:00		2794	Armando Francisco	44			2		2	Furvela
2694	98	2003	6	18	2003-06-18	25	00:00:00	10:04:00		4233	Victoria Orlando	0	4		2	36.6	2	jogo	0	1	1	0	0	0
2691	98	2003	6	18	2003-06-18	25	00:00:00	10:05:00			Marta Ernesto	1	4		2	36.2	2	matumbela	0	5	1	0	0	0
2693	98	2003	6	18	2003-06-18	25	00:00:00	10:35:00		4232	Celso Geraldo	0	2		1	37.2	2	Furvela	0	3	1	0	0	0
2695	98	2003	6	18	2003-06-18	25	00:00:00	10:45:00		3198	Domingos Herinque	37			2		2	Furvela	1	0	0	0	0	0
2605	96	2003	6	18	2003-06-18	25	00:00:00	11:03:00		4190	Filipe Luis	0	11		1		2	jogo	0	3	1	0	0	0
2690	98	2003	6	18	2003-06-18	25	1900-01-10	1900-01-10		1	Nito Arnaldo	8			1	35.9	2	jogo	0	1	1	0	0	0
2606	96	2003	6	19	2003-06-19	25	00:00:00	07:55:00		4220	Carlos Antonio	20			2		2	jogo	0	1	1	0	0	0
2607	96	2003	6	19	2003-06-19	25	00:00:00	07:56:00		117	Benilde Francisco	14			2	37.8	2	Furvela	1	0	0	0	0	0
2614	96	2003	6	19	2003-06-19	25	00:00:00	10:55:00		3543	Agostinho Bernardo	1	2		2	37.9	2	matumbela	0	5	1	0	0	0
2616	96	2003	6	19	2003-06-19	25	00:00:00	11:03:00		4235	Joao Penicela			60	2		2	Furvela
2617	96	2003	6	19	2003-06-19	25	00:00:00	11:04:00			Alberto Luis			19	1		2		0	1	1	0	0	0
2609	96	2003	6	19	2003-06-19	25	1900-01-09	1900-01-09			Regina Joao			60	2		2	vilanculos	1	0	0	0	0	0
2615	96	2003	6	19	2003-06-19	25	1900-01-11	1900-01-11		4091	Evelia Bernardo	4			2		2	Furvela	0	3	1	0	0	0
2618	96	2003	6	20	2003-06-20	25	00:00:00	08:04:00		4236	Joana Tonela			55	2		2	jogo	1	0	0	0	0	0
2619	96	2003	6	20	2003-06-20	25	00:00:00	09:04:00		4237	Ricardo Pedro	16			2	37.7	2	matumbela	0	1	1	0	0	0
2620	96	2003	6	20	2003-06-20	25	00:00:00	09:45:00		4205	vanil da Sarifa			2	1	38.9	2	Furvela	0	4	1	0	0	0
2623	96	2003	6	23	2003-06-23	26	00:00:00	08:02:00		4239	Maria Gustavo			45	2		2	jogo	1	0	0	0	0	0
2624	96	2003	6	23	2003-06-23	26	00:00:00	08:03:00		4240	Mariana Armindo	4			2	37.3	2	bovane	0	0	0	0	3	0
2622	96	2003	6	23	2003-06-23	26	00:00:00	08:18:00		4238	Beatriz Mbata			60	1		2	jogo
2625	96	2003	6	23	2003-06-23	26	00:00:00	08:35:00		4241	Rita Joao	21			2		2	Furvela
2626	96	2003	6	23	2003-06-23	26	00:00:00	08:38:00		1708	Suema Manecas	1	7		1	39.6	2	Furvela
2627	96	2003	6	23	2003-06-23	26	00:00:00	08:55:00		4107	Lucia Francisco	0	10		2	38.2	2	Furvela	0	5	1	0	0	0
2634	96	2003	6	23	2003-06-23	26	11?				Rabileta Eusebio			38	2		2	nhabundo2
2590	95	2003	6	24	2003-06-24	26	00:00:00	09:01:00		1628	Aida Alexandre	28			1		2	matumbela	0	0	1	0	0	1
2591	95	2003	6	27	2003-06-27	26				4243	Pedro Raul	4			1	35.8	2	Furvela	0	0	0	1	0	0	0	0
2594	95	2003	6	30	2003-06-30	27	00:00:00	09:26:00		4244	Clesia da Beatriz	2	4		1	37.9	2	vilanculos	0	1	1	0	0	0
2595	95	2003	6	30	2003-06-30	27	00:00:00	09:48:00		3005	Edna Alfiado	1	11		2	36	2	jogo	0	1	1	0	0	0
2598	95	2003	6	30	2003-06-30	27	00:00:00	10:02:00		4079	Marlene Miguel	0	5		1	36.8	2	vilanculos	0	1	1	0	1	0
2597	95	2003	6	30	2003-06-30	27	00:00:00	10:15:00			Clarinda Francisco	14			1		2	bato	0	3	1	0	0	0
2602	95	2003	6	30	2003-06-30	27	00:00:00	11:25:00			Severiano Orlando	0	6		1		2	Furvela	0	5	1	0	0	0			hospital
2604	95	2003	6	30	2003-06-30	27	00:00:00	11:56:00		746	Isabel Antonio	53			2		2	Furvela
2592	95	2003	6	30	2003-06-30	27	1900-01-09	1900-01-09		4002	Laura Jacinto	24			1		2	jogo	1	0	0	0	0	0
2559	94	2003	7	1	2003-07-01	27	00:00:00	08:05:00			Otildo C. Jorge	0	7		1	37.2	2	chibaela	1	0	0	0	0	0
2563	94	2003	7	1	2003-07-01	27	00:00:00	09:03:00		4246	Mae=Alda Fernando	0	3		2	37.8	2	beula	0	4	1	0	0	0
2566	94	2003	7	1	2003-07-01	27	00:00:00	09:05:00		230	Isaura Francisco	44			1		2	Furvela	1	0	0	0	0	0
2561	94	2003	7	1	2003-07-01	27	00:00:00	09:06:00		4109	Jose Ricardo	0	7		1	39	2	muengue	0	5	1	0	0	0
2567	94	2003	7	1	2003-07-01	27	00:00:00	10:15:00		3490	Armando Ricardo	1	1		2	38.4	2	matumbela	0	4	1	0	0	0
2568	94	2003	7	2	2003-07-02	27	00:00:00	08:15:00		4248	Joana Laquene			55	2		2	Furvela	1	0	0	0	0	0
2586	94	2003	7	3	2003-07-03	27	00:00:00				Ilda Alfredo	0	3		1	37.6	2	pambara	0	4	1	0	0	0
2576	94	2003	7	3	2003-07-03	27	00:00:00	07:05:00		4254	Laura Miguel			50	2		2	vilanculos	0	1	1	0	0	0								TR
2577	94	2003	7	3	2003-07-03	27	00:00:00	08:01:00			Almera Quilambo			58	2		2	Furvela	1	0	0	0	0	0
2581	94	2003	7	3	2003-07-03	27	00:00:00	08:35:00			Virginia Juliao	33			2		2	Furvela
2583	94	2003	7	3	2003-07-03	27	00:00:00	09:18:00		4257	Delia Eugenio	23			2		2	Furvela	0	2	1	0	0	0
2333	86	2003	7	3	2003-07-03	27	00:00:00	09:38:00		4345	Nilsa Joao	7			2		2	Furvela	1	0	0	0	0	0
2337	86	2003	7	3	2003-07-03	27	00:00:00	10:01:00		4347	Gercia Artiel	10			2		2	matumbela	0	3	1	0	0	0
2339	86	2003	7	3	2003-07-03	27	00:00:00	10:02:00		4032	Felizarda Faife			70	2		2	Furvela	1	0	0	0	0	0
2338	86	2003	7	3	2003-07-03	27	00:00:00	10:15:00		4348	Amelia Rafael	39			2		2	jogo	1	0	0	0	0	0
2335	86	2003	7	3	2003-07-03	27	1900-01-10	1900-01-10			Lostina Gildo	4	8		1		2	Matumbela	1	0	0	0	0	0
2526	93	2003	7	4	2003-07-04	27	00:00:00	08:25:00		3910	Tania B. Jose	1	1		2	39.5	2	matumbela	0	5	1	0	0	0
2530	93	2003	7	4	2003-07-04	27	00:00:00	10:01:00		4151	Luis Pedro	22			2		2	Furvela	1	0	0	0	0	0
2534	93	2003	7	7	2003-07-07	28	00:00:00	08:25:00			Graca Joao	24			2		2	matumbela	1	0	0	0	0	0
2537	93	2003	7	7	2003-07-07	28	00:00:00	09:02:00		4265	Vanecha Joaquim	0	5		2		2	xidanga	0	1	1	0	0	0
2540	93	2003	7	7	2003-07-07	28	00:00:00	10:05:00		4266	Celia Lourenco	0	8		2	38.8	2	Furvela	0	5	1	0	0	0
2539	93	2003	7	7	2003-07-07	28	00:00:00	10:45:00		74	Domingos Jose	3			1	37.9	2	Furvela	0	5	1	0	0	0								TR
2542	93	2003	7	7	2003-07-07	28	00:00:00	11:11:00		4268	Sonia Joao	17			2		2	Furvela	0	3	1	0	0	0
2535	93	2003	7	7	2003-07-07	28	1900-01-09	1900-01-09			Suzana Albino	23			2		2	jogo	0	1	1	0	0	0
2544	93	2003	7	8	2003-07-08	28	00:00:00	09:04:00		555	Madalena Jonas	0	7		2		2	Furvela	0	1	1	0	0	0
2549	93	2003	7	9	2003-07-09	28	00:00:00	07:55:00			Melucha Carlos	2	1		2	37.4	2	jogo	0	4	1	0	0	0
2554	93	2003	7	9	2003-07-09	28	00:00:00	09:15:00		4275	Noemia Antonio	13			1		2	jogo	0	1	1	1	0	0	0	0
2498	92	2003	7	9	2003-07-09	28	00:00:00	10:35:00			Carlos Elias	1	9		1		2	bovane	0	4	1	0	0	0
2501	92	2003	7	9	2003-07-09	28	00:00:00	11:01:00		4280	Alexandrina Antonio	1	8		2	39.1	2	Furvela	0	4	1	0	0	0
2502	92	2003	7	9	2003-07-09	28	00:00:00	11:22:00		4281	Joaquina Carlos	48			2		2	Furvela
2503	92	2003	7	9	2003-07-09	28	00:00:00	11:25:00		4282	Filomena Sambula			60	2		2	nhabundo2	1	0	0	0	0	0
2552	93	2003	7	9	2003-07-09	28	1900-01-09	1900-01-09		4274	Bendita Antonio	5			2		2	Furvela	0	3	1	0	0	0
2555	93	2003	7	9	2003-07-09	28	1900-01-10	1900-01-10		4276	Osvaldo Francisco	5			1		2	jogo	0	1	1	0	0	0
2512	92	2003	7	10	2003-07-10	28	00:00:00	09:05:00		4205	vanil da Sarifa	1	5		1	38	2	barane	0	4	1	0	0	0
2510	92	2003	7	10	2003-07-10	28	00:00:00	09:35:00			Angelica Alexandre	18			2		2	jogo
2513	92	2003	7	10	2003-07-10	28	00:00:00	10:03:00		4287	Joaquina Lucas			50	2		2	Furvela	0	3	1	0	0	0
2516	92	2003	7	11	2003-07-11	28	00:00:00	08:02:00		2930	Carlitos Bernardo	1	7		1		2	muengue	0	4	1	0	0	0
2517	92	2003	7	11	2003-07-11	28	00:00:00	09:05:00		2794	Armando Francisco	44			2		2	Furvela	0	1	1	0	0	0
2522	92	2003	7	11	2003-07-11	28	00:00:00	09:52:00		3153	Valdimiro F. Afonso	1	4		2	37.4	2	Furvela	0	4	1	0	0	0
2524	92	2003	7	11	2003-07-11	28	00:00:00	10:03:00		4290	Luis Zefanias	60			2		2	Furvela	1	0	0	0	0	0
2525	92	2003	7	11	2003-07-11	28	00:00:00	10:04:00		4197	Nercia Lucas	11			2		2	matumbela	0	1	0	3	0	0	0	0
2523	92	2003	7	11	2003-07-11	28	1900-01-10	1900-01-10		3667	Alcina F. Afonso	1	4		1	37.8	2	matumbela	0	4	1	0	0	0
2520	92	2003	7	11	2003-07-11	28				3639	Joao Januario			38	2	38.4	2	Furvela	0	2	1	0	0	0
2467	91	2003	7	14	2003-07-14	29	00:00:00	08:35:00		2911	Jorgina Raimundo			45	1		2	Jogo									hospital
2470	91	2003	7	14	2003-07-14	29	00:00:00	08:58:00		4291	Julieta Herinque	0	2		2	36	2	jogo
2474	91	2003	7	14	2003-07-14	29	00:00:00	09:33:00		4293	Nedia Jorge	7			2		2		1	0	0	0	0	0
2480	91	2003	7	15	2003-07-15	29	00:00:00	09:01:00		4294	Helena Jorge	24			2		2	Furvela	0	1	1	0	0	0
2481	91	2003	7	15	2003-07-15	29	00:00:00	09:13:00		4295	Ezbeida Benedito	16			1		2	Furvela	0	1	1	0	0	0
2482	91	2003	7	15	2003-07-15	29	00:00:00	10:08:00		4244	Clesia da Beatriz	2	5		2		2	jogo	0	3	1	0	0	0
2485	91	2003	7	16	2003-07-16	29	00:00:00	08:01:00		3872	Cecilia Alberto	11			2		2	Furvela	0	3	1	0	0	0
2486	91	2003	7	16	2003-07-16	29	00:00:00	09:04:00			Victoria Joao			40	2		2	jogo
2492	91	2003	7	17	2003-07-17	29	00:00:00	08:38:00		280	Alexandrina Antonio	1			2		2	jogo
2496	91	2003	7	17	2003-07-17	29	00:00:00	08:53:00		304	Jose Carlos	68			1	36.6	2	Ongue	1	0	0	0	0	0
2436	90	2003	7	17	2003-07-17	29	00:00:00	09:02:00		2291	Fausto Alberto	2	4		2	35.6	2	Furvela	0	3	1	0	0	0
2439	90	2003	7	17	2003-07-17	29	00:00:00	09:56:00		3550	Ana R. Alberto	1	3		2	37.1	2	mapinhane	0	3	1	0	0	0
2441	90	2003	7	17	2003-07-17	29	00:00:00	10:01:00		4190	Filipe Luis	1			1		2	Furvela	0	5	1	0	0	0
2442	90	2003	7	17	2003-07-17	29	00:00:00	10:03:00			Ilda Alfredo	0	4		1	38	2	balavala	0	3	1	0	0	0
2440	90	2003	7	17	2003-07-17	29	00:00:00	10:05:00		168	Amelia Miguel	41			2		2	matumbela	1	0	0	0	0	0
2445	90	2003	7	17	2003-07-17	29	00:00:00	11:03:00		3767	Isabel Fernando	0	9		1		2	matumbela	0	3	1	0	0	0
2446	90	2003	7	17	2003-07-17	29	00:00:00	11:35:00		4284	Maria Francisco	26			2		2	Furvela	1	0	0	0	0	0
2490	91	2003	7	17	2003-07-17	29	1900-01-08	1900-01-08		4298	Nevia Joaquim	0	5		1	37.6	2	Furvela	0	4	1	0	0	0
2447	90	2003	7	18	2003-07-18	29	00:00:00	08:01:00		620	Jose Ricardo	14			2		2	Furvela	0	1	1	0	0	0
2448	90	2003	7	18	2003-07-18	29	00:00:00	08:33:00		4302	Luisa Jose	7			2		2	jogo	1	0	0	0	0	0
2451	90	2003	7	18	2003-07-18	29	00:00:00	09:04:00		4244	Clesia da Beatriz	1	5		1	39.4	2	Furvela	0	5	1	0	0	0
2450	90	2003	7	18	2003-07-18	29	00:00:00	09:36:00		4303	Judite Manuel	30			2		2	matumbela
2456	90	2003	7	21	2003-07-21	30	00:00:00	08:03:00		3260	Alzira Orlando	0	10		1		2	jogo	0	3	1	0	0	0
2454	90	2003	7	21	2003-07-21	30	00:00:00	08:11:00		379	Antonio Laice	80			2		2	Furvela
2455	90	2003	7	21	2003-07-21	30	00:00:00	08:15:00		382	Carla Antonio	2	8		2	36	2	Matumbela	0	1	1	0	0	0
2458	90	2003	7	21	2003-07-21	30	00:00:00	08:55:00		4304	Sarifa Ussene	28			2		2	Furvela	0	1	1	0	0	0
2459	90	2003	7	21	2003-07-21	30	00:00:00	09:05:00			Olga Rogerio	1	1		1	37	2	jogo	0	4	1	1	0	0	0	0
2460	90	2003	7	21	2003-07-21	30	00:00:00	09:22:00		3880	Elsa Alfiado	0	8		2	40.1	2	jogo	0	4	1	0	0	0
2407	89	2003	7	22	2003-07-22	30	00:00:00	09:01:00		418	Sarneta Xavier	38			2		2	Furvela	0		1	0	0	0							TRAP
2412	89	2003	7	22	2003-07-22	30	00:00:00	10:01:00		4310	Jose Manuel	8			1		2	matumbela	1	0	0	0	0	0
2413	89	2003	7	22	2003-07-22	30	00:00:00	10:55:00		1707	Saquina Ussene	21			2		2	m`bene	1	0	0	0	0	0
2417	89	2003	7	23	2003-07-23	30	00:00:00	08:25:00		4311	Angelica Zacarias	1	3		2	38.9	2	xidanga	0	1	1	0	0	0
2419	89	2003	7	23	2003-07-23	30	00:00:00	09:35:00			Dercio Armando	15			1		2	vilanculos	0	3	1	0	0	0
2423	89	2003	7	23	2003-07-23	30	00:00:00	10:04:00		4009	Gloria Arnaldo	1	4		1		2	Furvela	0	4	1	0	0	0
2424	89	2003	7	23	2003-07-23	30	00:00:00	10:45:00		600	Xavier Joaquim	7			1		2	Furvela		1	1	0	0	0	16	530
2425	89	2003	7	23	2003-07-23	30	00:00:00	10:55:00			Alfredo Alberto	0	10		2		2	Furvela	0	5	1	0	0	0
2426	89	2003	7	23	2003-07-23	30	00:00:00	11:36:00		203	Mauricio Sebastiao	4			1		2	Furvela	0	3	1	0	0	0
2432	89	2003	7	24	2003-07-24	30	00:00:00	09:02:00		3429	Carolina Rafael	1			2	38.2	2	jogo	0	3	1	0	0	0
2433	89	2003	7	24	2003-07-24	30	00:00:00	09:03:00		2847	Recelia Alexandre	3			2		2	Furvela	0	4	1	0	0	0			hospital
2431	89	2003	7	24	2003-07-24	30	00:00:00	09:15:00		4228	Sonia Oscar	0	5		1	36.6	2	Furvela	0	4	1	0	0	0
2434	89	2003	7	24	2003-07-24	30	00:00:00	09:58:00		3059	Aderito Felizberto	1	5		1	37.5	2	Furvela	0	4	1	0	0	0
2374	88	2003	7	24	2003-07-24	30	00:00:00	10:59:00			Iolanda Salvador	2			2		2	Furvela	0	1	1	0	0	0
2376	88	2003	7	24	2003-07-24	30	00:00:00	11:03:00		464	Sebastiao Rungo	67			1		2	Furvela	0	1	1	0	0	0
2378	88	2003	7	25	2003-07-25	30	00:00:00	08:03:00		4317	Marta Ricardo	55			2		2	jogo	1	0	0	0	0	0
2380	88	2003	7	25	2003-07-25	30	00:00:00	09:02:00		4318	Zelia Francisco	0	3		1	37	2	jogo	0	5	1	0	0	0								TR
2381	88	2003	7	25	2003-07-25	30	00:00:00	09:35:00		171	Arnaldo Alfredo	12			2		2	jogo	1	0	0	0	0	0
2382	88	2003	7	25	2003-07-25	30	00:00:00	09:55:00			Gloria Mario	14			2		2	jogo
2384	88	2003	7	25	2003-07-25	30	00:00:00	10:02:00		4207	Cacilda Joao	18			2		2	Furvela	1	0	0	0	0	0
2386	88	2003	7	28	2003-07-28	31	00:00:00	08:05:00		4320	Julinha Xavier			20	2		2	Furvela	1	0	0	0	0	0
2392	88	2003	7	28	2003-07-28	31	00:00:00	09:02:00		121	Lopes Herinque	4			1		2	matumbela	0	1	1	0	0	0
2391	88	2003	7	28	2003-07-28	31	00:00:00	09:15:00		4323	Otilia Eduardo	21			2		2	jogo	1	0	0	0	0	0
2393	88	2003	7	28	2003-07-28	31	00:00:00	09:26:00		870	Joana Alberto	29			1		2	Jogo
2400	88	2003	7	28	2003-07-28	31	00:00:00	10:01:00		23307	Albertina Ofisso	36			1	37.3	2	Jogo
2398	88	2003	7	28	2003-07-28	31	00:00:00	10:04:00		4326	Graca Alexandre	0	10		2		2	matumbela	0	4	1	0	0	0								TR
2399	88	2003	7	28	2003-07-28	31	00:00:00	10:06:00		4327	Nelson Fernando	6			1		2	jogo	0	1	1	0	0	0
2401	88	2003	7	28	2003-07-28	31	00:00:00	10:15:00		4328	Gracinda Artur	0	10		2		2	jogo	0	3	1	0	0	0
2342	87	2003	7	28	2003-07-28	31	00:00:00	11:22:00		4331	Victoria Fernando	26			1		2	Furvela	1	0	0	0	0	0
2388	88	2003	7	28	2003-07-28	31	1900-01-09	1900-01-09		4321	Amelia Luis	1	3		1		2	Furvela	0	3	1	0	0	0
2346	87	2003	7	29	2003-07-29	31	00:00:00	08:02:00		4334	Afonso Covene	16			1		2	Furvela	1	0	0	0	0	0
2344	87	2003	7	29	2003-07-29	31	00:00:00	08:02:00		4332	Ana Tomas	30			2		2	Furvela	1	0	0	0	0	0
2343	87	2003	7	29	2003-07-29	31	00:00:00	08:18:00		381	Aida Manuel	25			1		2	nharrumbo	0	3	1	0	0	0						resistente
2348	87	2003	7	29	2003-07-29	31	00:00:00	09:48:00		4335	Victoria Joao	1	11		2		2	Furvela	0	4	1	0	0	0
2349	87	2003	7	29	2003-07-29	31	00:00:00	09:58:00		4336	Beatriz Francisco	20			2		2	xidanga
2356	87	2003	7	30	2003-07-30	31	00:00:00	09:58:00		4341	Elsa Armando			17	2		2	Furvela	0	1	1	0	0	0
2359	87	2003	7	30	2003-07-30	31	00:00:00	11:15:00		302	Carolina Simoes	44			2		2	Furvela	1	0	1	0	0	0								TR
2360	87	2003	7	31	2003-07-31	31	00:00:00	07:55:00		4344	Joaqum Eugenio	0	5		2	36.9	2	Furvela	0	3	1	0	0	0
2364	87	2003	7	31	2003-07-31	31	00:00:00	08:03:00			Rafael Magoque			35	2		2	Furvela	1	0	0	0	0	0
2367	87	2003	7	31	2003-07-31	31	00:00:00	08:04:00		1	Nito Arnaldo	3	5		2	37.4	2	Furvela	0	1	1	0	0	0
2363	87	2003	7	31	2003-07-31	31	00:00:00	08:28:00		2983	Domingos Rafael	28			2		2	Furvela	1	0	0	0	0	0
2370	87	2003	7	31	2003-07-31	31	00:00:00	09:03:00			Jamalso Sulemane	13			1		2	bovane
2369	87	2003	7	31	2003-07-31	31	00:00:00	09:16:00			Cacilda Pedro	27			1		2	nharrumbo	1	0	0	0	0	0			hospital
2371	87	2003	7	31	2003-07-31	31	00:00:00	09:35:00		3888	Arsenio J.Pedro	0	6		2	35.9	2	jogo	0	1	1	0	0	0
2368	87	2003	7	31	2003-07-31	31	1900-01-09	1900-01-09		2910	Crimilda Candido	16			1		2	matumbela	0	1	1	0	0	0
2304	85	2003	8	1	2003-08-01	31	00:00:00	10:15:00		1707	Joaquina Ussene	21			1		2	Furvela
2303	85	2003	8	1	2003-08-01	31	1900-01-09	1900-01-09		4349	Janete Mario	6			2		2	Furvela	0	3	1	0	0	0
2307	85	2003	8	4	2003-08-04	32	00:00:00	08:05:00		4350	Luisa Carlos	22			2		2	Furvela	0	1	1	0	0	0
2306	85	2003	8	4	2003-08-04	32	00:00:00	08:37:00		229	Antonio Alberto	15			2		2	Furvela	0	1	1	0	0	0
2308	85	2003	8	4	2003-08-04	32	00:00:00	09:35:00		4351	Gercia Fernando	1	8		1	39.3	2	Furvela	0	4	1	0	0	0
2312	85	2003	8	4	2003-08-04	32	00:00:00	10:01:00		4354	Joana Augusto	18			2		2	matumbela	0	1	1	0	0	0
2318	85	2003	8	4	2003-08-04	32	00:00:00	11:03:00		4296	Ivone Adzinda				2		2	Furvela
2305	85	2003	8	4	2003-08-04	32	1900-01-08	1900-01-08		1434	Florencia Simericio	42			1		2	nharrumbo	0	0	1	0	0	1	0	0
2319	85	2003	8	5	2003-08-05	32	00:00:00	08:01:00		4356	Teresa Pascoal	32			1	36.8	2	matumbela	0	1	1	0	0	0
2321	85	2003	8	5	2003-08-05	32	00:00:00	08:33:00		4	Amelia Facela	43			2		2	Furvela
2326	85	2003	8	5	2003-08-05	32	00:00:00	10:04:00		4205	Vanil da Sarifa	2	6		1		2	Beula	0	3	1	0	0	0
2327	85	2003	8	5	2003-08-05	32	00:00:00	11:13:00		4359	Esperanca Pedro	5			2		2	nhachengwe
2329	85	2003	8	6	2003-08-06	32	00:00:00	08:55:00		599	Julieta Joao	28			1		2	matumbela	0	3	1	0	0	0
2331	85	2003	8	6	2003-08-06	32	00:00:00	09:28:00			Maria Fernando			60	2		2	jogo	1	0	0	0	0	0
2273	84	2003	8	6	2003-08-06	32	00:00:00	09:44:00		49	Maria Rungo	65			1	36.7	2	Furvela
2274	84	2003	8	6	2003-08-06	32	00:00:00	10:03:00		4360	Lucrenca Ernesto	0	2		2	36.9	2	Furvela	1	0	0	0	0	0
2277	84	2003	8	6	2003-08-06	32	00:00:00	10:54:00		1251	Joana Alberto	50			1		2	Jogo	0	3	1	0	0	0
2281	84	2003	8	6	2003-08-06	32	00:00:00	12:01:00			Belmiro Timoteo	11			1		2	Furvela	0	1	1	0	0	0
2280	84	2003	8	6	2003-08-06	32	00:00:00	12:04:00		4090	Iolanda Halima	13			1		2	Furvela	0	0	1	0	3	1	0	0
2282	84	2003	8	6	2003-08-06	32	00:00:00	12:12:00			Nelson Pascoal				1		2	Furvela	0	1	1	0	0	0
2330	85	2003	8	6	2003-08-06	32	1900-01-09	1900-01-09			Lucinda Alfiado	18			2		2	jogo	0	3	1	0	0	0
2286	84	2003	8	7	2003-08-07	32	00:00:00	08:05:00		4363	Diana Alberto	22			2		2	Furvela	1	0	0	0	0	0
2283	84	2003	8	7	2003-08-07	32	00:00:00	08:25:00		4362	Roberto Frederico	8			2		2	bovane	0	3	1	0	0	0						control
2285	84	2003	8	7	2003-08-07	32	00:00:00	08:45:00		3490	Armando Ricardo	1	3		2	38.6	2	Furvela	0	1	1	0	0	0
2287	84	2003	8	7	2003-08-07	32	00:00:00	09:52:00			Aderito Joao	1	4		2	34.6	2	matumbela	1	0	0	0	0	0
2291	84	2003	8	8	2003-08-08	32	00:00:00	09:05:00		4364	Frederico Miguel	13			2		2	Furvela	1	0	0	0	0	0
2292	84	2003	8	8	2003-08-08	32	00:00:00	09:47:00		4365	Adelia Augusto	14			2		2	Furvela	0	1	1	0	0	0
2293	84	2003	8	8	2003-08-08	32	00:00:00	10:06:00		4366	Eugenio Antonio	21			2		2	jogo	0	3	1	0	0	0
2290	84	2003	8	8	2003-08-08	32	1900-01-09	1900-01-09		3889	Esmenia Daniel	0	7		2		2	matumbela
2294	84	2003	8	8	2003-08-08	32	1900-01-11	1900-01-11		83	Anita Seneta	31			1	36.2	2	Furvela	0	1	1	0	0	0
2296	84	2003	8	11	2003-08-11	33	00:00:00	08:54:00		4367	Rosa Jamal	28			2		2	Furvela	0	1	1	0	0	0
2297	84	2003	8	11	2003-08-11	33	00:00:00	09:18:00		23337	Ana Armando	22			2		2	Furvela	0	1	1	0	0	0
2298	84	2003	8	11	2003-08-11	33	00:00:00	09:21:00		4167	Raimundo Jose	26			1		2	nhalivala
2301	84	2003	8	11	2003-08-11	33	00:00:00	10:47:00		1641	Delefina Alberto	20			1		2	jogo	1	0	0	0	0	0
2299	84	2003	8	11	2003-08-11	33	1900-01-10	1900-01-10		4368	Fernando Nguila	28			2		2	Furvela	0	1	1	0	0	0			hospital
2241	83	2003	8	12	2003-08-12	33	00:00:00	08:02:00			Josefa Joaquim	1			2		2	Furvela	0	3	1	0	0	0
2244	83	2003	8	12	2003-08-12	33	00:00:00	08:05:00		3767	Isabel Fernando	0	10		1	36.6	2	matumbela	0	1	1	0	0	0
2242	83	2003	8	12	2003-08-12	33	00:00:00	08:36:00		114	Naiva Augusto	3			1	37.8	2	Furvela	0	3	1	0	0	0
2248	83	2003	8	12	2003-08-12	33	00:00:00	10:03:00			Elisa O. Sebastiao	1	11		2	36.6	2	m'bene	0	3	1	0	0	0			hospital
2245	83	2003	8	12	2003-08-12	33	1900-01-09	1900-01-09		4370	Julieta Luis	1	9		2	39.3	2	Furvela	0	5	1	0	0	0
2249	83	2003	8	13	2003-08-13	33	00:00:00	08:04:00		3942	Fatima Herinque	39			2		2	Furvela	1	0	0	0	0	0
2251	83	2003	8	13	2003-08-13	33	00:00:00	09:15:00		3830	Argentina Carlos	0	7		2	39.4	2	jogo	0	1	1	0	0	0
2253	83	2003	8	13	2003-08-13	33	00:00:00	10:03:00			Graca Fenicela	38			1		2	Furvela
2258	83	2003	8	14	2003-08-14	33	00:00:00	08:04:00		4083	Regina Ngovene	24			2	36.7	2	Furvela
2257	83	2003	8	14	2003-08-14	33	00:00:00	08:36:00		4372	Isabel Joaquim			50	2		2	jogo	1	0	0	0	0	0
2260	83	2003	8	14	2003-08-14	33	00:00:00	09:05:00			Angelica Ernesto	26			1	36.4	2	Furvela	1	0	0	0	0	0
2264	83	2003	8	14	2003-08-14	33	00:00:00	11:11:00		4374	Jacinto Filipe	0	11		1	37	2	matumbela	0	1	1	0	3	0
2255	83	2003	8	14	2003-08-14	33	1900-01-08	1900-01-08		4371	Ernesto Milisse	73			1		2	Furvela	1	0	0	0	0	0
2259	83	2003	8	14	2003-08-14	33	1900-01-09	1900-01-09		4373	Maria Romeu	8			1		2	xidanga	1	0	0	0	0	0
2266	83	2003	8	15	2003-08-15	33	00:00:00	08:55:00		1708	Suema Manecas	1	9		2		2	nhalivala	1	0	0	0	0	0
2270	83	2003	8	15	2003-08-15	33	00:00:00	09:35:00		3922	Agnalda Agostinho	1	4		1	37.7	2	Furvela	0	4	1	0	0	0
2271	83	2003	8	15	2003-08-15	33	00:00:00	09:46:00		2930	Calisto Bernardo	1	8		1	37.9	2	Jogo	0	3	1	0	0	0
2272	83	2003	8	15	2003-08-15	33	00:00:00	09:55:00		165	Albertina Americo	23			2		2	jogo	0	1	1	0	0	0
2210	82	2003	8	15	2003-08-15	33	00:00:00	10:05:00			Catarina Alberto	5			2		2	matumbela	1	0	0	0	0	0
2209	82	2003	8	15	2003-08-15	33	00:00:00	10:47:00			Sergio Ernesto	30			1		2	matumbela	0	4	1	0	0	0
2213	82	2003	8	18	2003-08-18	34	00:00:00	08:15:00		3005	Elencia Alfiado	2	1		1		2	Furvela	0	4	1	0	0	0
2216	82	2003	8	18	2003-08-18	34	00:00:00	09:02:00		3329	Fatima Salatiel	28			2		2	matumbela	1	0	0	0	0	0
2217	82	2003	8	18	2003-08-18	34	00:00:00	09:03:00		4379	Lidia Francisco	9			2		2	jogo	1	0	0	0	0	0
2215	82	2003	8	18	2003-08-18	34	00:00:00	09:18:00		3327	Marta Armando	2			2	37	2	Furvela	0	3	1	0	0	0
2219	82	2003	8	18	2003-08-18	34	00:00:00	11:05:00		4381	Amelia Jose	23			2		2	xidanga	0	1	1	0	0	0
2220	82	2003	8	18	2003-08-18	34	00:00:00	11:11:00			Ricardo Francisco	42			2		2	Furvela
2211	82	2003	8	18	2003-08-18	34	1900-01-08	1900-01-08		4378	Miloca Fernando	3	7		1	37.1	2	Furvela	0	3	1	0	0	0
2224	82	2003	8	19	2003-08-19	34	00:00:00	09:05:00		4383	Amelia Joao	21			2		2	Furvela	0	0	0	0	0	1
2221	82	2003	8	19	2003-08-19	34	00:00:00	09:09:00			Gracinda Lucas	2	3		2		2	Jogo	0	1	1	0	0	0
2223	82	2003	8	19	2003-08-19	34	00:00:00	09:45:00		4382	Celeste Rui	1	1		2	36	2	Furvela	0	3	1	0	0	0
2227	82	2003	8	19	2003-08-19	34	00:00:00	10:04:00		3210	Dulce Zacarias	1	2		1	36.7	2	maxixe	0	1	1	0	0	0
2228	82	2003	8	19	2003-08-19	34	00:00:00	10:05:00		3211	Matilda Feliciano	30			1		2	Furvela	0	0	0	0	3	0	0	0
2226	82	2003	8	19	2003-08-19	34	00:00:00	10:07:00				18			2		2	jogo
2231	82	2003	8	20	2003-08-20	34	00:00:00	08:15:00		3612	Eunice da Claudia	1	10		2	38.5	2	Jogo
2232	82	2003	8	20	2003-08-20	34	00:00:00	09:03:00		4385	Lucrencia Roberto	3			2		2	Furvela	0	1	1	0	0	0
2233	82	2003	8	20	2003-08-20	34	00:00:00	09:04:00		4386	Zita Solomone	4			2		2	Furvela	0	5	1	0	0	0
2234	82	2003	8	20	2003-08-20	34	00:00:00	09:05:00		3453	Edson Constantino	1	4		1		2	matumbela	0	3	1	0	0	0
2229	82	2003	8	20	2003-08-20	34	1900-01-08	1900-01-08		4196	Albertina Bambo			60	2		2	Lihuklo	0	3	1	0	0	0
2237	82	2003	8	21	2003-08-21	34	00:00:00	09:09:00			Rosta Antonio	0	6		1	37.1	2		0	1	1	0	0	0
2239	82	2003	8	21	2003-08-21	34	00:00:00	09:53:00		4233	Victoria Orlando	0	6		2		2	jogo	0	5	1	0	0	0
2179	81	2003	8	21	2003-08-21	34	1900-01-12	1900-01-12		4388	Flavio Alberto	4			2	36.6	2	matumbela	0	3	1	0	0	0
2182	81	2003	8	22	2003-08-22	34	00:00:00	09:15:00		171	Joana Alberto	55			2		2	nharrumbo
2183	81	2003	8	22	2003-08-22	34	00:00:00	09:35:00		4390	Maria Antonio	0	3		2	39.2	2	Furvela	0	4	1	0	0	0
2180	81	2003	8	22	2003-08-22	34	1900-01-08	1900-01-08		4389	Miguel Luis	30			2	36.8	2	Furvela	1	0	0	0	0	0
2189	81	2003	8	25	2003-08-25	35	00:00:00	10:04:00		4392	Arnaldo Carlos	0	6		1	36.7	2	nharrumbo	0	3	1	0	0	0
2187	81	2003	8	25	2003-08-25	35	1900-01-09	1900-01-09		255	Ivete Armando	14			1		2	Furvela
2191	81	2003	8	26	2003-08-26	35	00:00:00	08:03:00		468	Ivone Bejamim	15			2		2	matumbela	1	0	0	0	0	0
2190	81	2003	8	26	2003-08-26	35	00:00:00	08:14:00		972	Regina Fernando	44			1		2	Furvela	0	1	1	0	0	0
2192	81	2003	8	26	2003-08-26	35	00:00:00	08:35:00		4393	Delton Carlitos	0	4		2	40	2	matumbela	0	4	1	0	0	0
2193	81	2003	8	26	2003-08-26	35	00:00:00	09:01:00		267	Zefanias Armando	2	9		2	38.9	2	Jogo
2194	81	2003	8	26	2003-08-26	35	00:00:00	09:38:00		4394	Carlos Niquisse	30			1		2	jogo	1	0	0	0	0	0
2195	81	2003	8	26	2003-08-26	35	00:00:00	10:01:00		4395	Catarina Andre	9			2	37.1	2	Furvela	1	0	0	0	0	0
2197	81	2003	8	26	2003-08-26	35	00:00:00	10:04:00		4396	Candida Mateus	0	8		2	35.8	2	jogo	0	3	1	0	0	0
2196	81	2003	8	26	2003-08-26	35	00:00:00	10:26:00		3396	Revaldo Jacinto	0	11		1		2	jogo	0	4	1	0	0	0
2199	81	2003	8	26	2003-08-26	35	00:00:00	11:11:00		4397	Hilario Jose	8			2		2	Furvela	0	1	1	0	0	0
2203	81	2003	8	27	2003-08-27	35	00:00:00	08:04:00		4399	Angelica Marcelina	18			2		2	Furvela	0	1	1	0	0	0
2200	81	2003	8	27	2003-08-27	35	00:00:00	08:08:00			Josefa Joaquim	1	1		2	37.5	2	Furvela	0	3	1	0	0	0
2205	81	2003	8	27	2003-08-27	35	00:00:00	09:05:00		4400	Julia Ernesto	23			2		2	jogo	1	0	0	0	0	0
2207	81	2003	8	28	2003-08-28	35	00:00:00	10:01:00			Asilda Ernesto	5			2		2	Furvela	0	3	1	0	0	0
2208	81	2003	8	28	2003-08-28	35	00:00:00	10:25:00		1082	Nunes Jacinto	11			2		2	Furvela	1	0	0	0	0	0
2175	80	2003	8	29	2003-08-29	35	00:00:00	08:01:00		3694	Auneta Johane	55			1	36	2	muengue	1	0	0	0	0	0						resistente
2174	80	2003	8	29	2003-08-29	35	00:00:00	08:06:00		4220	Carlos Antonio	20			1		2	Furvela	1	0	0	0	0	0
2177	80	2003	8	29	2003-08-29	35	00:00:00	10:04:00			Elsa Alfiado	0	9		2		2	jogo	0	3	1	0	0	0			hospital
2173	80	2003	8	29	2003-08-29	35	1900-01-08	1900-01-08		4402	Argentina Jorge	12			1		2	jogo	1	0	0	0	0	0
2139	79	2003	9	1	2003-09-01	36	00:00:00	08:02:00		13	Jose Mauricio	14			2		2	Furvela	0	1	1	0	0	0
2140	79	2003	9	1	2003-09-01	36	00:00:00	08:03:00		4014	Diocencia Francisco	1	6		2	38.8	2	Furvela	0	4	1	0	0	0			hospital
2141	79	2003	9	1	2003-09-01	36	00:00:00	08:28:00		4403	Laura Covane			60	1		2	Furvela
2144	79	2003	9	1	2003-09-01	36	00:00:00	08:46:00		4406	Elisa Chamussa	25			2		2	matumbela	1	0	0	0	0	0
2146	79	2003	9	1	2003-09-01	36	1900-01-09	1900-01-09		4407	Julia Jacinto	21			2		2	Furvela	1	0	0	0	0	0
2154	79	2003	9	2	2003-09-02	36	00:00:00	08:03:00		4409	Adalaida Joaquim			50	1		2	Furvela	0	1	1	0	0	0
2155	79	2003	9	2	2003-09-02	36	00:00:00	08:05:00			Recelia Armando	18			1		2	Furvela	1	0	0	0	0	0
2159	79	2003	9	2	2003-09-02	36	00:00:00	11:02:00			Bernardino Jose	0	8		1	39.4	2	bovane	0	4	1	0	0	0
2157	79	2003	9	2	2003-09-02	36	1900-01-09	1900-01-09		4410	Rogerio Geraldo	0	6		2	36.4	2	matumbela	0	4	1	0	0	0
2161	79	2003	9	3	2003-09-03	36	00:00:00	08:13:00		4413	Feniasse Mauricio	2	1		2		2	jogo	0	3	1	0	0	0
2165	79	2003	9	3	2003-09-03	36	00:00:00	09:18:00		3076	Anavalda Alexandre	2	5		1	38.2	2	Furvela
2166	79	2003	9	3	2003-09-03	36	00:00:00	09:21:00		4416	Elencia Alexandre	5			2		2	jogo	1	0	0	0	0	0
2168	79	2003	9	3	2003-09-03	36	00:00:00	09:36:00		4417	Angelina Mufanequisso				2		2	jogo	1	0	0	0	0	0
2169	79	2003	9	3	2003-09-03	36	00:00:00	11:07:00			Princesa Jose	11			2		2	matumbela	1	0	0	0	0	0
2170	79	2003	9	3	2003-09-03	36	00:00:00	11:11:00		4418	Halima Ussene	11			2		2	Furvela	1	0	0	0	0	0
2107	78	2003	9	3	2003-09-03	36						1	3		1	39.2	2	bovane	0	1	1	0	0	0
2108	78	2003	9	3	2003-09-03	36				4419		5			1		2	matumbela	0	1	1	0	0	0
2116	78	2003	9	4	2003-09-04	36	00:00:00	09:04:00		137		6			1		2	Furvela	1	0	0	0	0	0
2113	78	2003	9	4	2003-09-04	36	00:00:00	09:18:00						50	2		2	Furvela	0	1	1	0	0	0
2114	78	2003	9	4	2003-09-04	36	00:00:00	09:25:00		1660		1	5		1		2	Furvela	0	4	1	0	0	0
2118	78	2003	9	4	2003-09-04	36	00:00:00	11:25:00				41			1		2	matumbela	0	0	0	0	1	0			hospital
2112	78	2003	9	4	2003-09-04	36						1	4		2	36.4	2	matumbela	1	0	0	0	0	0			hospital
2115	78	2003	9	4	2003-09-04	36				3327		1	1		1	37.4	2	Furvela	0	3	1	0	0	0
2110	78	2003	9	4	2003-09-04	36				3005		2	1		2	36.6	2	Jogo	0	1	1	0	0	0
2111	78	2003	9	4	2003-09-04	36				590		22			2		2	Furvela	0	1	1	0	0	0
2125	78	2003	9	9	2003-09-09	37	00:00:00	07:15:00		3739		28			2		2	Jogo	1	0	0	0	0	0
2126	78	2003	9	9	2003-09-09	37	00:00:00	07:45:00		4421		24			2		2	matumbela	0	0	1	0	0	1	0	0
2130	78	2003	9	9	2003-09-09	37	00:00:00	08:05:00		4422		11			2		2	matumbela	0	1	1	0	0	0			hospital
2134	78	2003	9	9	2003-09-09	37	00:00:00	09:42:00		4423		33			1		2	Bovane									hospital
2075	77	2003	9	9	2003-09-09	37	00:00:00	11:37:00		3917		14			2		2	bovane	0	3	1	0	0	0
2127	78	2003	9	9	2003-09-09	37	1900-01-08	1900-01-08		4006		1	3		2		2	matumbela
2077	77	2003	9	10	2003-09-10	37	00:00:00	08:01:00		4425				50	1		2	jogo	1	0	0	0	0	0
2082	77	2003	9	10	2003-09-10	37	00:00:00	08:05:00							2	39.6	2	Furvela	0	4	1	0	0	0			hospital
2078	77	2003	9	10	2003-09-10	37	00:00:00	08:15:00		4426		3			2	38.5	2	chibaela	0	1	1	0	0	0
2079	77	2003	9	10	2003-09-10	37	00:00:00	08:26:00		1411		38			1	36.4	2	massinga	1	0	0	0	0	0
2080	77	2003	9	10	2003-09-10	37	00:00:00	08:36:00		4427		0	7		2	38	2	Furvela	1	0	0	0	0	0
2083	77	2003	9	10	2003-09-10	37	00:00:00	09:47:00				1	5		2	37.5	2	jogo	0	4	1	0	0	0
2087	77	2003	9	11	2003-09-11	37	00:00:00	08:03:00		4428		32			2		2	Furvela	1	0	0	0	0	0
2088	77	2003	9	11	2003-09-11	37	00:00:00	08:04:00		23307		35			1	36	2	Jogo	0	1	1	0	0	0
2091	77	2003	9	11	2003-09-11	37	00:00:00	09:03:00				25			1	36	2	Furvela	1	0	0	0	0	0
2093	77	2003	9	11	2003-09-11	37	00:00:00	11:04:00				20			1		2	Furvela	1	0	0	0	0	0
3410	154	2003	9	12	2003-09-12	37	00:00:00	08:02:00			Josefa Joaquim	1			2		2	Furvela	0	3	1	0	0	0						resistente
3411	154	2003	9	12	2003-09-12	37	00:00:00	08:03:00		114	Naiva Augusto	3			1	37.8	2	Furvela	0	3	1	0	0	0
3413	154	2003	9	12	2003-09-12	37	00:00:00	08:05:00		3767	Isabel Fernando	0	10		2	39.2	2	matumbela	0	3	1	0	0	0
2096	77	2003	9	12	2003-09-12	37	00:00:00	08:15:00		1657		25			1	36.1	2	nharrumbo	0	3	1	0	0	0
3412	154	2003	9	12	2003-09-12	37	00:00:00	08:44:00		4369	Amosse Isaias	0	6		1		2	nhabanda	0	5	1	0	0	0
2099	77	2003	9	12	2003-09-12	37	00:00:00	09:02:00		3888		0	8		2	36.6	2	Furvela	0	3	1	0	0	0
2100	77	2003	9	12	2003-09-12	37	00:00:00	09:47:00		3132		1	4		1	37.1	2	Furvela	1	0	0	0	0	0
2097	77	2003	9	12	2003-09-12	37				4431		1	7		2	36.8	2	bovane	0	0	0	3	0	0	0	0
3418	154	2003	9	13	2003-09-13	37	00:00:00	08:04:00		3942	Fatima Herinque	39			1		2	mahangue
3420	154	2003	9	13	2003-09-13	37	00:00:00	09:55:00		3830	Argentina Carlos	0	7		2	39.4	2	jogo	0	1	1	0	0	0
3422	154	2003	9	13	2003-09-13	37	00:00:00	10:03:00			Graca Penicela	38			1	36.8	2	Furvela	1	0	0	0	0	0
3419	154	2003	9	13	2003-09-13	37	1900-01-09	1900-01-09		2923	Armando Tique	61			1		2	Furvela	1	0	0	0	0	0
3427	154	2003	9	14	2003-09-14	37	00:00:00	08:04:00		4083	Regina Ngovene	24			1		2	Furvela	1	0	0	0	0	0
3426	154	2003	9	14	2003-09-14	37	00:00:00	08:36:00		4372	Isabel Joaquim			50	2		2	jogo	1	0	0	0	0	0
3429	154	2003	9	14	2003-09-14	37	00:00:00	09:05:00			Angelica Ernesto	26			1		2	bovane	1	0	0	0	0	0
3430	154	2003	9	14	2003-09-14	37	00:00:00	09:44:00		4360	Lucrencia Ernesto	0	3		2	39.9	2	2nhabundo	0	4	1	0	0	0
3432	154	2003	9	14	2003-09-14	37	00:00:00	10:04:00		6	Televina Samuel	16			1		2	Furvela	1	0	0	0	0	0
3424	154	2003	9	14	2003-09-14	37	1900-01-08	1900-01-08		4371	Ernesto Milisse	73			1		2	Furvela	0	3	1	0	0	0
3428	154	2003	9	14	2003-09-14	37	1900-01-09	1900-01-09		4373	Maria Romeu	8			2	38.8	2	Furvela
3435	154	2003	9	15	2003-09-15	38	00:00:00	08:55:00		1708	Suema Manecas	1	9		2		2	nhalivala	1	0	0	0	0	0						resistente
3441	154	2003	9	15	2003-09-15	38	00:00:00	09:55:00		165	Albertina Americo	23			2		2	muengue	1	0	0	0	0	0
2106	77	2003	9	15	2003-09-15	38	00:00:00	10:18:00		170		4	5		1	38.5	2	Furvela	0	3	1	0	0	0
2044	76	2003	9	15	2003-09-15	38	00:00:00	10:38:00		51		2	7		1	37.9	2	jogo	0	4	1	0	0	0
2101	77	2003	9	15	2003-09-15	38	1900-01-08	1900-01-08		4432		0	4		2		2	jogo	0	5	1	0	0	0
2048	76	2003	9	16	2003-09-16	38	00:00:00	10:04:00				41			1		2	Furvela	0	1	1	0	0	0
2052	76	2003	9	17	2003-09-17	38	00:00:00	09:33:00		4437		15			2		2	Chibuto	0	1	1	0	0	0
2053	76	2003	9	17	2003-09-17	38	00:00:00	09:36:00		4438		14			2	38	2	Furvela	0	1	1	0	0	0
2055	76	2003	9	17	2003-09-17	38	00:00:00	10:05:00		1707		21			1	36.2	2	furvela	1	0	0	0	0	0
2056	76	2003	9	17	2003-09-17	38	1900-01-11	1900-01-11		3192		1	6		2	36	2	jogo	0	1	1	0	1	0
2058	76	2003	9	18	2003-09-18	38	00:00:00	08:08:00		3830		0	8		2	38.1	2	jogo	0	3	1	0	1	0
2060	76	2003	9	18	2003-09-18	38	00:00:00	09:05:00		4440		20			2	37.1	2	Furvela	0	1	1	0	0	0
2061	76	2003	9	18	2003-09-18	38	00:00:00	09:42:00		3003		1	4		1	37.3	2	matumbela	1	0	0	0	0	0
2063	76	2003	9	18	2003-09-18	38	00:00:00	09:56:00		3669		1			2		2	Furvela	1	0	0	0	0	0
2067	76	2003	9	19	2003-09-19	38	00:00:00	07:05:00				45			1	36.5	2	Furvela
2068	76	2003	9	19	2003-09-19	38	00:00:00	07:55:00		4442		1	2		2	37.1	2	Furvela	0	5	1	0	0	0
2069	76	2003	9	19	2003-09-19	38	00:00:00	08:08:00		4443		17			1		2	balavala	1	0	0	0	0	0
2072	76	2003	9	19	2003-09-19	38	00:00:00	09:44:00		4444		0	9		1	37.8	2	Furvela	0	0	0	0	3	0	0	0
2014	75	2003	9	22	2003-09-22	39	00:00:00	07:48:00		4445		0	3		1	38.4	2	Vala	0	3	1	0	0	0
2018	75	2003	9	22	2003-09-22	39	00:00:00	08:04:00		266		4			1	36.6	2	Furvela	1	0	0	0	0	0
2024	75	2003	9	22	2003-09-22	39	00:00:00	08:04:00		4448		0	2		2	36.1	2	Jogo	0	3	1	0	0	0
2025	75	2003	9	22	2003-09-22	39	00:00:00	08:05:00		4449		25			2		2	jogo	1	0	0	0	0	0
2023	75	2003	9	22	2003-09-22	39	00:00:00	08:36:00		172		65			2		2	Furvela
2030	75	2003	9	22	2003-09-22	39	00:00:00	10:29:00		4452		0	4		2		2	Furvela	0	5	1	0	0	0							TRAP
2032	75	2003	9	22	2003-09-22	39	00:00:00	11:03:00							2		2		0	1	1	0	0	0
2017	75	2003	9	22	2003-09-22	39	1900-01-08	1900-01-08		4432		0	4		1	36.4	2	unguana	0	1	1	0	0	1
2031	75	2003	9	22	2003-09-22	39	1900-01-11	1900-01-11		4233		0	7		2	37.5	2	balavala	0	4	1	0	0	0
2033	75	2003	9	23	2003-09-23	39	00:00:00	08:01:00		3333		1	1		1	36	2	furvela	0	3	1	0	0	0
2036	75	2003	9	23	2003-09-23	39	00:00:00	08:52:00	08:52:00			42			2		2	Wengue									hospital					TR
2039	75	2003	9	23	2003-09-23	39	00:00:00	09:38:00				46			1		2	Jogo	1	0	0	0	0	0
1985	74	2003	9	24	2003-09-24	39	00:00:00	08:01:00		3900		1	3			37.9	2	Furvela	0	1	1	0	0	0
1990	74	2003	9	24	2003-09-24	39	00:00:00	10:03:00		4456		25			1		2	Chocwe	1	0	0	0	0	0
1993	74	2003	9	26	2003-09-26	39	00:00:00	08:05:00		4459		12			2		2	Bovane	0	4	1	0	0	0
1992	74	2003	9	26	2003-09-26	39	00:00:00	08:44:00		4458		0	4		1		2	Bovane	0	4	1	0	0	0	404	510
1994	74	2003	9	26	2003-09-26	39	00:00:00	08:55:00				11			1	36.6	2	Jogo	0	3	1	0	0	0
1995	74	2003	9	26	2003-09-26	39	00:00:00	09:05:00				27			2		2	Furvela
1997	74	2003	9	26	2003-09-26	39	00:00:00	11:11:00				22			1		2	Jogo	1	0	0	0	0	0
2002	74	2003	9	29	2003-09-29	40	00:00:00	08:25:00		4463		10			2		2	Furvela									hospital
2006	74	2003	9	29	2003-09-29	40	00:00:00	09:09:00				30			1		2	furvela	0	1	1	0	0	0
2007	74	2003	9	29	2003-09-29	40	00:00:00	09:16:00		4442		1	2		2	37.4	2	Jogo	0	1	1	0	0	0
2011	74	2003	9	29	2003-09-29	40	00:00:00	11:07:00		4466		0	6		1	35	2	Matumbela	0	3	1	0	0	0
2013	74	2003	9	29	2003-09-29	40	00:00:00	18:35:00				1	7		1	37.4	2	Furvela	0	3	1	0	0	0
1976	73	2003	9	30	2003-09-30	40	00:00:00	08:08:00						40	2		2	jogo	1	0	0	0	0	0
1979	73	2003	9	30	2003-09-30	40	00:00:00	09:18:00		4467		4			2		2	jogo	0	1	1	0	0	0
1981	73	2003	9	30	2003-09-30	40	00:00:00	10:04:00		4468		0.0246575			1	38.3	2	matumbela	1	0	0	0	0	0
1983	73	2003	9	30	2003-09-30	40	00:00:00	10:05:00				1	11		2	36.6	2	Furvela	0	1	1	0	0	0
1975	73	2003	9	30	2003-09-30	40	1900-01-08	1900-01-08		2859		63			2		2	Furvela	0	1	1	0	0	0
303	11	2004	1	7	2004-01-07	2		07:05:00		779		56			2		2	jogo	0	1	1	0	0	0
291	11	2004	1	7	2004-01-07	2	00:00:00	08:05:00	08:05:00	4778		25			1		2	Furvela									hospital
285	11	2004	1	7	2004-01-07	2	00:00:00	08:13:00		4847		7			1		2	Kambine	1	0	0	0	0	0
287	11	2004	1	7	2004-01-07	2	00:00:00	08:25:00		2		7			2		2	Furvela	0	1	1	0	0	0
290	11	2004	1	7	2004-01-07	2	00:00:00	08:45:00				0	6		1	35.8	2	Furvela	0	4	1	0	0	0
293	11	2004	1	7	2004-01-07	2	00:00:00	09:01:00		4849		40			1		2	Furvela	1	0	0	0	0	0
295	11	2004	1	7	2004-01-07	2	00:00:00	09:03:00		4856		11			2		2	Jogo	1	0	0	0	0	0
296	11	2004	1	7	2004-01-07	2	00:00:00	09:38:00		3132		1	7		2	38.5	2	Matumbela	0	3	1	0	0	0
300	11	2004	1	7	2004-01-07	2	00:00:00	10:04:00		3379		11			1		2	Furvela	1	0	0	0	0	0
298	11	2004	1	7	2004-01-07	2	00:00:00	10:29:00		4487		0	7		2	36.7	2	Furvela	0	5	1	0	0	0
299	11	2004	1	7	2004-01-07	2	00:00:00	10:35:00				31			2		2	Furvela
301	11	2004	1	7	2004-01-07	2	00:00:00	10:58:00		1747		4	6		1		2	Furvela
302	11	2004	1	7	2004-01-07	2	00:00:00	11:04:00		1997		23			2		2	Jogo	0	4	1	0	0	0
28	2	2004	1	8	2004-01-08	2	00:00:00	09:05:00				70			2		2	Jogo	0	1	1	0	0	0
26	2	2004	1	8	2004-01-08	2	00:00:00	09:38:00		1058		12			2		2	Furvela	1	0	0	0	0	0
30	2	2004	1	8	2004-01-08	2	00:00:00	10:01:00		1983		2			2	39.7	2	Furvela	0	4	1	0	0	0
29	2	2004	1	8	2004-01-08	2	00:00:00	10:07:00		39		4			1	38.6	2	Furvela	0	1	1	0	0	0
32	2	2004	1	8	2004-01-08	2	00:00:00	10:25:00		4585		19			2		2	Matumbela	1	0	0	0	0	0
33	2	2004	1	8	2004-01-08	2	00:00:00	10:37:00				0	8		2	38.2	2	Matumbela
310	11	2004	1	8	2004-01-08	2	1900-01-08	1900-01-08		4853		16			1		2	Furvela	1	0	0	0	0	0
311	11	2004	1	8	2004-01-08	2	1900-01-08	1900-01-08		4854		21			2		2	Jogo	1	0	0	0	0	0
305	11	2004	1	8	2004-01-08	2	1900-01-08	1900-01-08		4850		1	7		1	38.8	2	Matumbela	0	1	1	0	0	0
309	11	2004	1	8	2004-01-08	2	1900-01-08	1900-01-08		4852		26			2		2	Jogo	0	1	1	0	0	0
306	11	2004	1	8	2004-01-08	2	1900-01-08	1900-01-08		4851		30			1	34	2	Furvela	0	1	1	0	0	0
307	11	2004	1	8	2004-01-08	2	1900-01-08	1900-01-08				2	1		1	36.7	2	Jogo
313	11	2004	1	8	2004-01-08	2	1900-01-09	1900-01-09		382		2			1	38.6	2	Furvela	0	3	1	0	0	0
315	11	2004	1	8	2004-01-08	2	1900-01-09	1900-01-09		1980		25			2		2	Jogo	0	1	1	0	0	0
314	11	2004	1	8	2004-01-08	2	1900-01-09	1900-01-09		1981		0	5		1	37.4	2	Matumbela														s
38	2	2004	1	9	2004-01-09	2	00:00:00	08:01:00		4857		4			1	38.2	2	Wengue	0	1	1	0	0	0
39	2	2004	1	9	2004-01-09	2	00:00:00	08:38:00		226		3	4		1	37.4	2	Furvela	0	1	1	0	0	0
43	2	2004	1	9	2004-01-09	2	00:00:00	09:01:00		4858		32			2	36.6	2	Furvela	0	1	1	0	0	0
46	2	2004	1	9	2004-01-09	2	00:00:00	09:05:00		4860		0	4		1	38	2	Furvela	0	3	1	0	0	0
50	2	2004	1	9	2004-01-09	2	00:00:00	10:02:00		3314		9			1	39.4	2	Furvela	1	0	0	0	0	0
254	10	2004	1	12	2004-01-12	3	00:00:00	08:55:00				70			1		2	Jogo	1	0	0	0	0	0
259	10	2004	1	12	2004-01-12	3	00:00:00	09:03:00		4861		2	6		2	39.6	2	Furvela	0	3	1	0	0	0
264	10	2004	1	12	2004-01-12	3	00:00:00	09:05:00				1	6		1	37	2	Furvela	0	1	1	0	0	0
256	10	2004	1	12	2004-01-12	3	00:00:00	09:15:00		7785		20			2		2	Jogo
257	10	2004	1	12	2004-01-12	3	00:00:00	09:18:00		4390		0	8		1		2	Matumbela	0	2	1	0	0	0
261	10	2004	1	12	2004-01-12	3	00:00:00	09:38:00		4863		6			1		2	Jogo	1	0	0	0	0	0
262	10	2004	1	12	2004-01-12	3	00:00:00	09:43:00		4864		52			1		2	Huwa
263	10	2004	1	12	2004-01-12	3	00:00:00	09:45:00		1939		0	11		1	37.7	2	Jogo	0	3	1	0	0	0
265	10	2004	1	12	2004-01-12	3	00:00:00	09:55:00		1859		22			1		2	Matumbela	1	0	0	0	0	0
268	10	2004	1	12	2004-01-12	3	00:00:00	10:01:00		4866		23			1		2	Matumbela	0	3	1	0	0	0
271	10	2004	1	12	2004-01-12	3	00:00:00	10:03:00				7			1		2	Furvela	1	0	0	0	0	0
267	10	2004	1	12	2004-01-12	3	00:00:00	10:04:00		4895		54			2		2	Jogo	0	1	1	0	0	0
278	10	2004	1	12	2004-01-12	3	00:00:00	10:05:00		269		3	4		1	38.1	2	Matumbela	0	3	1	0	0	0
269	10	2004	1	12	2004-01-12	3	00:00:00	10:11:00		4867		0	4		1	37.1	2	Furvela	1	0	0	0	0	0
273	10	2004	1	12	2004-01-12	3	00:00:00	10:35:00		1450		12			1	39	2	Jogo	1	0	0	0	0	0
274	10	2004	1	12	2004-01-12	3	00:00:00	10:38:00		4869		0	3		1		2	Furvela	0	3	1	0	0	0
276	10	2004	1	12	2004-01-12	3	00:00:00	10:45:00	10:45:00	1667		23			2		2	Jogo									hospital
277	10	2004	1	12	2004-01-12	3	00:00:00	10:48:00		466		10			1	37.3	2	Furvela	0	3	1	0	0	0
280	10	2004	1	12	2004-01-12	3	00:00:00	11:04:00		4870		10			1		2	Furvela	1	0	0	0	0	0
279	10	2004	1	12	2004-01-12	3	00:00:00	11:11:00				1	2		1	36.6	2	Matumbela	0	3	1	0	0	0
266	10	2004	1	12	2004-01-12	3	1900-01-10	1900-01-10		4865		1	10		2	39.4	2	Furvela	0	4	1	0	0	0								TR
281	10	2004	1	13	2004-01-13	3	00:00:00	07:45:00		1958		54			2	38.6	2	Furvela	0	1	1	0	0	0
282	10	2004	1	13	2004-01-13	3	00:00:00	07:52:00		4871		35			2		2	Furvela	0	3	1	0	0	0
283	10	2004	1	13	2004-01-13	3	00:00:00	07:55:00				12			1		2	Furvela
192	8	2004	1	13	2004-01-13	3	00:00:00	08:02:00		437		81			2		2	Furvela	0	3	1	0	0	0
193	8	2004	1	13	2004-01-13	3	00:00:00	08:25:00		4872		1	9		2	35.5	2	matumbela	0	3	1	0	0	0
194	8	2004	1	13	2004-01-13	3	00:00:00	08:32:00		1628		30			2		2	Matumbela	0	3	1	0	0	0
196	8	2004	1	13	2004-01-13	3	00:00:00	08:46:00		3649		1	5		2	36.7	2	matumbela	0	3	1	0	0	0
197	8	2004	1	13	2004-01-13	3	00:00:00	08:54:00		405		61			2		2	Furvela	1	0	0	0	0	0
199	8	2004	1	13	2004-01-13	3	00:00:00	09:13:00		1978		11			1		2	Jogo
200	8	2004	1	13	2004-01-13	3	00:00:00	09:18:00		4873		2			1	38.6	2	Matumbela	0	3	1	0	0	0
201	8	2004	1	13	2004-01-13	3	00:00:00	09:28:00				24			1		2	Matumbela	1	0	0	0	0	0
202	8	2004	1	13	2004-01-13	3	00:00:00	09:52:00		510		36			1		2	Furvela	0	1	1	0	0	0
203	8	2004	1	13	2004-01-13	3	00:00:00	09:55:00		4874		1	2		1	35.9	2	Jogo	0	1	1	0	0	0
205	8	2004	1	13	2004-01-13	3	00:00:00	10:01:00		4875		0	11		2	38.6	2	Furvela
206	8	2004	1	13	2004-01-13	3	00:00:00	10:15:00				2	8		1	37.7	2	Furvela	0	3	1	0	0	0
207	8	2004	1	13	2004-01-13	3	00:00:00	10:43:00		4876		0	3		1	36.3	2	Furvela	0	4	1	0	0	0
208	8	2004	1	13	2004-01-13	3	00:00:00	10:46:00				2			1	36.7	2	Jogo	0	4	1	0	0	0
198	8	2004	1	13	2004-01-13	3	1900-01-09	1900-01-09		1977		20			1		2	Matumbela	1	0	0	0	0	0
204	8	2004	1	13	2004-01-13	3	1900-01-10	1900-01-10		4883		13			2		2	Jogo	0	3	1	0	0	0						resistente
209	8	2004	1	14	2004-01-14	3	00:00:00	07:02:00				68			2	35.4	2	Furvela
212	8	2004	1	14	2004-01-14	3	00:00:00	08:34:00		1897		1			2	39.7	2	Furvela	0	5	1	0	0	0
215	8	2004	1	14	2004-01-14	3	00:00:00	08:46:00		4881		24			1		2	Furvela	1	0	0	0	0	0
216	8	2004	1	14	2004-01-14	3	00:00:00	08:58:00		4882		65			1		2	Ulos	1	0	0	0	0	0
221	8	2004	1	14	2004-01-14	3	00:00:00	09:04:00		4840		0	2		1	37.8	2	Jogo	0	1	1	0	0	0
217	8	2004	1	14	2004-01-14	3	00:00:00	09:18:00		1931		0	3		1	37.4	2	Vala	0	4	1	0	0	0
219	8	2004	1	14	2004-01-14	3	00:00:00	09:34:00				3	3		1	36.8	2	jogo	1	0	0	0	0	0
163	7	2004	1	15	2004-01-15	3	00:00:00	07:05:00		4835		55			1		2	Jogo	0	1	1	0	0	0
169	7	2004	1	15	2004-01-15	3	00:00:00	08:03:00		3804		19			2		2	Jogo	1	0	0	0	0	0
164	7	2004	1	15	2004-01-15	3	00:00:00	08:04:00	08:04:00	4836		6			1		2	Matumbela									hospital
166	7	2004	1	15	2004-01-15	3	00:00:00	08:14:00		4888		3			2	37.1	2	Inharumbo
170	7	2004	1	15	2004-01-15	3	00:00:00	08:35:00	08:35:00	4891		0	5		1	36	2	Jogo									hospital
173	7	2004	1	15	2004-01-15	3	00:00:00	09:06:00		4892		12			2		2	Matumbela	1	0	0	0	0	0
175	7	2004	1	15	2004-01-15	3	00:00:00	09:15:00		1950		0	11		1	37.9	2	Jogo	0	1	1	0	0	0
176	7	2004	1	15	2004-01-15	3	00:00:00	09:24:00		4675		0	3		2	37.6	2	Furvela	0	1	1	0	0	0
177	7	2004	1	15	2004-01-15	3	00:00:00	09:38:00		4893		62			1		2	Furvela	1	0	0	0	0	0
180	7	2004	1	15	2004-01-15	3	00:00:00	10:37:00		4586		0	5		2	35.8	2	M'bene	0	1	1	0	0	0						resistente
182	7	2004	1	15	2004-01-15	3	00:00:00	10:56:00				29			1		2	Furvela	0	3	1	0	0	0
172	7	2004	1	15	2004-01-15	3	1900-01-09	1900-01-09		4244		2	1		1	37.5	2	Matumbela	0	4	1	0	0	0
183	7	2004	1	16	2004-01-16	3	00:00:00	07:04:00		1784		19			1	35.3	2	Furvela	0	1	1	0	0	0
186	7	2004	1	16	2004-01-16	3	00:00:00	08:02:00		4564		11			2	36.1	2	Inharumbo	0	1	1	0	0	0
184	7	2004	1	16	2004-01-16	3	00:00:00	08:05:00		4894		50			1		2	Matumbela	1	0	0	0	0	0
187	7	2004	1	16	2004-01-16	3	00:00:00	08:25:00		2718		2	4		1		2	Jogo	0	1	1	0	0	0
189	7	2004	1	16	2004-01-16	3	00:00:00	09:04:00		4895		7			2		2	Furvela	0	1	1	0	0	0
191	7	2004	1	16	2004-01-16	3	00:00:00	09:37:00		225		40			2		2	Furvela	0	1	1	0	0	0
223	9	2004	1	16	2004-01-16	3	00:00:00	09:44:00		634		3	1		1		2		0	3	1	0	0	0
224	9	2004	1	16	2004-01-16	3	00:00:00	09:46:00		4896		6			2		2	Jogo	0	1	1	0	0	0
228	9	2004	1	16	2004-01-16	3	00:00:00	10:02:00				20			1		2	Furvela	1	0	0	0	0	0
226	9	2004	1	16	2004-01-16	3	00:00:00	10:16:00		4897		0	3		1	40	2	Furvela	0	5	1	0	0	0
229	9	2004	1	16	2004-01-16	3	00:00:00	10:32:00		4898		18			1		2	Matumbela	1	0	0	0	0	0
230	9	2004	1	16	2004-01-16	3	00:00:00	10:36:00	10:36:00	4899		1	1		1	39.5	2	Matumbela									hospital
231	9	2004	1	16	2004-01-16	3	00:00:00	10:58:00		4109		1	6		1		2	Jogo	0	4	1	0	0	0
235	9	2004	1	16	2004-01-16	3	00:00:00	11:03:00		4900		5			2		2	Furvela	0	2	1	0	0	0
233	9	2004	1	16	2004-01-16	3	00:00:00	11:08:00		4579		25			1		2	Jogo	0	1	1	0	0	0
234	9	2004	1	16	2004-01-16	3	00:00:00	11:28:00				1	11		1		2	Arrame	0	3	1	0	0	0
236	9	2004	1	16	2004-01-16	3	00:00:00	11:35:00		4901		4			1	39.3	2	Jogo	0	1	1	0	0	0
188	7	2004	1	16	2004-01-16	3	1900-01-09	1900-01-09		4822		0	3		2	37	2	Furvela	0	3	1	0	0	0
243	9	2004	1	19	2004-01-19	4	00:00:00	08:04:00	08:04:00	4014		45			1		2	Furvela	0	1	1	0	0	0			hospital
237	9	2004	1	19	2004-01-19	4	00:00:00	08:15:00		1769		60			1		2	Furvela	1	0	0	0	0	0
238	9	2004	1	19	2004-01-19	4	00:00:00	08:21:00				23			2		2	Jogo	0	3	1	0	0	0
241	9	2004	1	19	2004-01-19	4	00:00:00	08:34:00		4902		19			2		2	Furvela
242	9	2004	1	19	2004-01-19	4	00:00:00	08:38:00		4903		1	11		2	38	2	Singa	0	5	1	0	0	0
244	9	2004	1	19	2004-01-19	4	00:00:00	08:45:00		4904		11			1		2	Furvela	1	0	0	0	0	0
245	9	2004	1	19	2004-01-19	4	00:00:00	08:47:00				19			2		2	Jogo	1	0	0	0	0	0
246	9	2004	1	19	2004-01-19	4	00:00:00	08:55:00				14			1		2	Jogo	0	3	1	0	0	0
247	9	2004	1	19	2004-01-19	4	00:00:00	08:58:00		4905		1	1		2		2	Wengue	0	1	1	0	0	0
132	6	2004	1	19	2004-01-19	4	00:00:00	09:05:00		3889		1			1	36.6	2	Furvela	0	5	1	0	0	0
249	9	2004	1	19	2004-01-19	4	00:00:00	09:09:00				0	1		1	37.4	2	Furvela	0	4	1	0	0	0
251	9	2004	1	19	2004-01-19	4	00:00:00	09:16:00		4908		60			1		2	Furvela	0	1	1	0	0	0
253	9	2004	1	19	2004-01-19	4	00:00:00	09:32:00		4575		2	11		1	37.6	2	Jogo	0	5	1	0	0	0
131	6	2004	1	19	2004-01-19	4	00:00:00	09:45:00		1983		5			1		2	Furvela	1	0	0	0	0	0
133	6	2004	1	19	2004-01-19	4	00:00:00	09:55:00		98		44			2		2	Furvela	1	0	0	0	0	0
138	6	2004	1	19	2004-01-19	4	00:00:00	10:03:00				2			2	35.8	2	xixe	0	1	1	0	0	0
137	6	2004	1	19	2004-01-19	4	00:00:00	10:26:00		65		42			1		2	Jogo	0	1	1	0	0	0
139	6	2004	1	19	2004-01-19	4	00:00:00	11:02:00		3544		20			2	36.7	2	Jogo	0	1	1	0	0	0
248	9	2004	1	19	2004-01-19	4	1900-01-09	1900-01-09		4906		4			2	36	2	Jogo	0	3	1	0	0	0
141	6	2004	1	20	2004-01-20	4	00:00:00	07:56:00		4910		7			2	35.7	2		0	3	1	0	0	0						resistente
142	6	2004	1	20	2004-01-20	4	00:00:00	08:06:00		4911		19			2		2	Jogo	1	0	0	0	0	0
143	6	2004	1	20	2004-01-20	4	00:00:00	08:16:00		4191		20			1		2	Furvela	1	0	0	0	0	0
145	6	2004	1	20	2004-01-20	4	00:00:00	08:35:00		6913		10			2	36	2	Furvela	0	1	1	0	0	0
147	6	2004	1	20	2004-01-20	4	00:00:00	08:45:00		4914		55			2		2	Furvela	1	0	0	0	0	0
150	6	2004	1	20	2004-01-20	4	00:00:00	09:02:00				1	3		1	35.9	2	Furvela	0	4	1	0	0	0
151	6	2004	1	20	2004-01-20	4	00:00:00	09:46:00		2268		2	5		2	38	2	Furvela	0	5	1	0	0	0
152	6	2004	1	20	2004-01-20	4	00:00:00	10:03:00		4915		65			2		2	Jogo
154	6	2004	1	20	2004-01-20	4	00:00:00	10:52:00	10:52:00	4916		0	7		1	37.6	2	Jogo									hospital
155	6	2004	1	20	2004-01-20	4	00:00:00	11:14:00		4192		2	1		2	39.4	2	Furvela	0	4	1	0	0	0
157	6	2004	1	20	2004-01-20	4	00:00:00	11:25:00				1	3		2		2	Furvela	0	1	1	0	0	0
159	6	2004	1	21	2004-01-21	4	00:00:00	07:05:00		4919		4			1		2	Furvela	0	5	1	0	0	0
160	6	2004	1	21	2004-01-21	4	00:00:00	07:55:00		4920		10			1		2	Vala	1	0	0	0	0	0
100	5	2004	1	21	2004-01-21	4	00:00:00	08:02:00		4922		0	9		2	36.9	2	Furvela	0	4	1	0	0	0
99	5	2004	1	21	2004-01-21	4	00:00:00	08:15:00	08:15:00	4921		0	3		1	36.1	2	Chidanga									hospital
101	5	2004	1	21	2004-01-21	4	00:00:00	08:53:00		4923		0	9		2	39.8	2	Furvela	0	4	1	0	0	0
104	5	2004	1	22	2004-01-22	4	00:00:00	07:56:00		4925		1	10		2	36.6	2	Furvela	0	3	1	0	0	0
106	5	2004	1	22	2004-01-22	4	00:00:00	08:55:00	08:55:00	4801		1	6		2	37	2	Jogo									hospital
108	5	2004	1	22	2004-01-22	4	00:00:00	09:02:00		4927		2			1	38	2	Wengue	0	1	1	0	0	0
110	5	2004	1	22	2004-01-22	4	00:00:00	10:22:00		74		2	11		2		2	Vala	0	3	1	0	0	0	571	58
720	26	2004	1	24	2004-01-24	4	00:00:00	08:45:00		2911		55			2	35.4	2	Furvela
721	26	2004	1	24	2004-01-24	4	00:00:00	09:14:00				3	1		1	40	2	jogo	0	4	1	0	0	0
722	26	2004	1	24	2004-01-24	4	00:00:00	09:35:00		4988		1	7		1	35.6	2	Psaela									hospital
723	26	2004	1	24	2004-01-24	4	00:00:00	09:45:00		6034		0	6		2	39.1	2	Matumbela	0	3	1	0	0	0
724	26	2004	1	24	2004-01-24	4	00:00:00	09:55:00		4921		0	4		1		2	Furvela	1	0	0	0	0	0
725	26	2004	1	24	2004-01-24	4	00:00:00	10:02:00				1	5		2	36	2	Maivene	0	1	1	0	0	0
728	26	2004	1	24	2004-01-24	4	00:00:00	10:03:00		1963		18			2		2	Furvela	1	0	0	0	0	0
727	26	2004	1	24	2004-01-24	4	00:00:00	10:26:00		6074		9			1		2	Vala	0	1	1	0	0	0
729	26	2004	1	24	2004-01-24	4	00:00:00	10:34:00		6106		1	2		2	37.3	2	Wengue	0	3	1	0	0	0
730	26	2004	1	24	2004-01-24	4	00:00:00	10:44:00		5018		4			1	36.8	2	Furvela	1	0	0	0	0	0
732	26	2004	1	24	2004-01-24	4	00:00:00	11:02:00		6107		0	1		2	39	2	Wengue	0	3	1	0	0	0						control
731	26	2004	1	24	2004-01-24	4	00:00:00	11:04:00		5159		4	1		1	36.8	2	jogo	0	1	1	0	0	0
111	5	2004	1	26	2004-01-26	5	00:00:00	07:55:00		362		70			2		2	Jogo	1	0	0	0	0	0
113	5	2004	1	26	2004-01-26	5	00:00:00	08:02:00				3	6		2	37.7	2	Furvela	0	2	1	0	0	0
115	5	2004	1	26	2004-01-26	5	00:00:00	08:03:00		4604		0	5		2		2	Matumbela	0	4	1	0	0	0								TR
119	5	2004	1	26	2004-01-26	5	00:00:00	08:05:00		4931		0	2		2	39	2	Furvela	0	3	1	0	0	0
112	5	2004	1	26	2004-01-26	5	00:00:00	08:07:00		4928		3	4		2	36.9	2	Matumbela	1	0	0	0	0	0
117	5	2004	1	26	2004-01-26	5	00:00:00	08:36:00		117		14			2		2	Matumbela
118	5	2004	1	26	2004-01-26	5	00:00:00	08:45:00	08:45:00	4930		7			1	36.1	2	Jogo									hospital					TR
120	5	2004	1	26	2004-01-26	5	00:00:00	08:56:00				1			2	36.6	2	Jogo	0	4	1	0	0	0
125	5	2004	1	26	2004-01-26	5	00:00:00	09:02:00		4935		4			2	37.7	2	Jogo	1	0	0	0	0	0
127	5	2004	1	26	2004-01-26	5	00:00:00	09:03:00		7784		1	2		2	36.8	2	Chidanga	0	4	1	0	0	0
122	5	2004	1	26	2004-01-26	5	00:00:00	09:05:00		4933		0	2		2	38.1	2	Jogo	0	3	1	0	0	0
121	5	2004	1	26	2004-01-26	5	1900-01-09	1900-01-09		4932		23			2		2	Furvela	0	1	1	0	0	0
317	12	2004	1	26	2004-01-26	5	1900-01-09	1900-01-09				1			1	36.1	2	Furvela
319	12	2004	1	26	2004-01-26	5	1900-01-10	1900-01-10		4938		0	6		2	36	2	Furvela	1	0	0	0	0	0
318	12	2004	1	26	2004-01-26	5	1900-01-10	1900-01-10				7			2		2	Jogo	1	0	0	0	0	0
322	12	2004	1	26	2004-01-26	5	1900-01-10	1900-01-10		4940		68			2		2	Furvela	1	0	0	0	0	0
321	12	2004	1	26	2004-01-26	5	1900-01-10	1900-01-10		4939		0	7		1	35.8	2	Beula	0	3	1	0	0	0
320	12	2004	1	26	2004-01-26	5	1900-01-10	1900-01-10		3132		1	8		1	39.8	2	jogo	0	2	1	0	0	0
323	12	2004	1	26	2004-01-26	5	1900-01-11	1900-01-11		4941		25			1		2	Furvela	1	0	0	0	0	0
325	12	2004	1	26	2004-01-26	5	1900-01-11	1900-01-11		4943		0	2		1	39.2	2	Inharumbo	0	4	1	0	0	0
1	1	2004	1	27	2004-01-27	5	00:00:00	11:05:00							1		2	Furvela	0	1	1	0	0	0
342	12	2004	1	27	2004-01-27	5	1900-01-11	1900-01-11		4947		13			2		2	Furvela	1	0	0	0	0	0
329	12	2004	1	27	2004-01-27	5	1900-01-11	1900-01-11		996		22			1	38.4	2	Furvela	1	0	0	0	0	0
327	12	2004	1	27	2004-01-27	5	1900-01-11	1900-01-11		4945		45			1		2	Jogo	1	0	0	0	0	0
341	12	2004	1	27	2004-01-27	5	1900-01-11	1900-01-11		329		49			1		2	Furvela	1	0	0	0	0	0
346	12	2004	1	27	2004-01-27	5	1900-01-11	1900-01-11		2986		1	11		1	36.7	2	Jogo	0	1	1	0	0	0
338	12	2004	1	27	2004-01-27	5	1900-01-11	1900-01-11		4946		1	7		2	36.1	2	Furvela	0	3	1	0	0	0
337	12	2004	1	27	2004-01-27	5	1900-01-11	1900-01-11				1	4		2		2	Furvela	0	5	1	0	0	0
344	12	2004	1	27	2004-01-27	5	1900-01-11	1900-01-11		4948		1	2		2	36.5	2	jogo	0	5	1	0	0	0								TR
330	12	2004	1	27	2004-01-27	5	1900-01-11	1900-01-11				2	4		1	36.9	2		0	2	1	0	0	0
339	12	2004	1	27	2004-01-27	5	1900-01-11	1900-01-11		4845		3			1		2	Matumbela	0	3	1	0	0	0
336	12	2004	1	27	2004-01-27	5	1900-01-11	1900-01-11				9			2	37	2	Inharumbo	0	3	1	0	0	0
345	12	2004	1	27	2004-01-27	5	1900-01-11	1900-01-11		1857		1	8		1	36	2	Matumbela									hospital
335	12	2004	1	27	2004-01-27	5	1900-01-11	1900-01-11		23203		2			1	37.7	2	Matumbela									hospital
332	12	2004	1	27	2004-01-27	5	1900-01-11	1900-01-11		4030		46			2		2	Furvela
331	12	2004	1	27	2004-01-27	5	1900-01-11	1900-01-11				50			1		2	Livenga
343	12	2004	1	27	2004-01-27	5	1900-01-11	1900-01-11		527		62			2		2	Jogo
4	1	2004	1	28	2004-01-28	5	00:00:00	07:58:00		4950		6			2	38	2	Matumbela	0	4	1	0	0	0
5	1	2004	1	28	2004-01-28	5	00:00:00	08:02:00		4951		18			1	36.3	2	Furvela	0	2	1	0	0	0
8	1	2004	1	28	2004-01-28	5	00:00:00	08:04:00		4953		21			2	36.6	2	Furvela	1	0	0	0	0	0
10	1	2004	1	28	2004-01-28	5	00:00:00	08:05:00		4954		42			2		2	Furvela	1	0	0	0	0	0
9	1	2004	1	28	2004-01-28	5	00:00:00	08:45:00		4432		0	8		2	38.6	2	Furvela	0	1	1	0	0	0
12	1	2004	1	28	2004-01-28	5	00:00:00	09:02:00		5069		27			2	38.8	2	Furvela	0	2	1	0	0	0
15	1	2004	1	28	2004-01-28	5	00:00:00	10:07:00		4956		0	11		2	39	2	Furvela	0	5	1	0	0	0
16	1	2004	1	28	2004-01-28	5	00:00:00	10:14:00		4957		0	7		2		2	Jogo	0	1	1	0	0	0
17	1	2004	1	28	2004-01-28	5	00:00:00	10:16:00				3			1		2	Jogo	0	1	1	0	0	0
14	1	2004	1	28	2004-01-28	5	1900-01-10	1900-01-10				1	6		2	35.6??!!	2		0	3	1	0	0	0
21	1	2004	1	28	2004-01-28	5	1900-01-11	1900-01-11		4959		9			1	35.9	2	m´bene
24	1	2004	1	29	2004-01-29	5	00:00:00	08:06:00				3	4		2	37.8	2	jogo	0	4	1	0	0	0
77	4	2004	1	29	2004-01-29	5	00:00:00	08:15:00	08:15:00	3937		0	11		2		2	Jogo	0	3	1	0	0	0			hospital
78	4	2004	1	29	2004-01-29	5	00:00:00	08:28:00		4962		1	2		2	37.9	2	Jogo	0	3	1	0	0	0
83	4	2004	1	29	2004-01-29	5	00:00:00	09:07:00		210		15			1	37.6	2	Furvela	1	0	0	0	0	0
88	4	2004	1	29	2004-01-29	5	00:00:00	10:03:00		1641		19			1		2	Furvela	0	3	1	0	0	0						resistente
91	4	2004	1	29	2004-01-29	5	00:00:00	10:04:00		4964		40			1		2	Furvela	0	1	1	0	0	0
87	4	2004	1	29	2004-01-29	5	00:00:00	10:26:00		5053		24			2		2	Massinga	1	0	0	0	0	0
89	4	2004	1	29	2004-01-29	5	00:00:00	10:32:00		3388		26			2		2	Furvela	0	1	1	0	0	0
90	4	2004	1	29	2004-01-29	5	00:00:00	10:37:00		1964		2	8		1	38.4	2	jogo	0	5	1	0	0	0
84	4	2004	1	29	2004-01-29	5	1900-01-10	1900-01-10		5110		2			1	36.6	2	Furvela	0	4	1	0	0	0
25	1	2004	1	29	2004-01-29	5				4961		24			2	36.7	2	jogo	0	1	1	0	0	0
94	4	2004	1	30	2004-01-30	5	00:00:00	07:05:00		4497		18			2		2	Jogo	1	0	0	0	0	0
92	4	2004	1	30	2004-01-30	5	00:00:00	07:35:00		5055		50			1		2	muengue	1	0	0	0	0	0
96	4	2004	1	30	2004-01-30	5	00:00:00	07:58:00		3280		5	5		1		2	Matumbela	0	0	0	0	1	0
97	4	2004	1	30	2004-01-30	5	00:00:00	08:02:00				13			2	36.3	2	Furvela	0	1	1	0	0	0	10	500
56	3	2004	1	30	2004-01-30	5	00:00:00	08:26:00		4968		18			2	38.6	2	Matumbela	0	1	1	0	0	0				68
98	4	2004	1	30	2004-01-30	5	00:00:00	08:26:00		4966		19			1		2	Furvela	0	1	1	0	0	0
57	3	2004	1	30	2004-01-30	5	00:00:00	08:46:00		4969		3	8		1	36.4	2	Furvela	0	2	1	0	0	0
59	3	2004	1	30	2004-01-30	5	00:00:00	09:16:00				3			2	36.6	2	Jogo	0	1	1	0	0	0
60	3	2004	1	30	2004-01-30	5	00:00:00	09:22:00				12			1		2	Furvela	1	0	0	0	0	0
61	3	2004	1	30	2004-01-30	5	00:00:00	09:37:00				1	1		2	37.5	2	jogo	0	4	1	0	0	0
64	3	2004	1	30	2004-01-30	5	00:00:00	09:55:00	09:55:00	4971		6			1		2	Matumbela									hospital
65	3	2004	1	30	2004-01-30	5	00:00:00	10:02:00		4972		14			1		2	Furvela
70	3	2004	1	30	2004-01-30	5	00:00:00	10:04:00		4973		0	1		1	36.1	2	Furvela	1	0	0	0	0	0
66	3	2004	1	30	2004-01-30	5	00:00:00	10:14:00				5	8		2		2	Jogo	0	1	1	0	0	0
67	3	2004	1	30	2004-01-30	5	00:00:00	10:16:00				1	3		1	37.7	2	Furvela	0	4	1	0	0	0
71	3	2004	1	30	2004-01-30	5	00:00:00	10:55:00		4974		19			2		2	Furvela	1	0	0	0	0	0
72	3	2004	1	30	2004-01-30	5	00:00:00	10:58:00		4304		27			1		2	Furvela	1	0	0	0	0	0
75	3	2004	1	30	2004-01-30	5	00:00:00	11:03:00		4976		17			1	36	2	Furvela
74	3	2004	1	30	2004-01-30	5	00:00:00	11:15:00		3767		1	4		2	36.2	2	Furvela	0	3	1	0	0	0
76	3	2004	1	30	2004-01-30	5	00:00:00	11:35:00		4977		4	7		2	37.6	2	jogo
73	3	2004	1	30	2004-01-30	5	1900-01-11	1900-01-11		4975		24			2		2	Matumbela	1	0	0	0	0	0
1227	44	2004	2	2	2004-02-02	6	00:00:00	07:54:00		622		55			1		2	Furvela	0	1	1	0	0	0
1230	44	2004	2	2	2004-02-02	6	00:00:00	08:08:00		996		22			2		2	Wengue									hospital
1233	44	2004	2	2	2004-02-02	6	00:00:00	08:29:00				36			1		2	Furvela	0	3	1	0	0	0						resistente
1238	44	2004	2	2	2004-02-02	6	00:00:00	08:51:00		4982		0	5		2	36.7	2	Jogo	0	5	1	0	0	0
1241	44	2004	2	2	2004-02-02	6	00:00:00	09:01:00		4984		7			1	36.6	2	Matumbela	0	1	1	0	0	0
1244	44	2004	2	2	2004-02-02	6	00:00:00	09:02:00		4986		50			1	35.6	2	Chidanga	0	1	1	0	0	0
1246	44	2004	2	2	2004-02-02	6	00:00:00	09:03:00		4987		50			1		2	Matumbela	0	1	1	0	0	0
1242	44	2004	2	2	2004-02-02	6	00:00:00	09:13:00				11			1	38.2	2	Barane									hospital
1243	44	2004	2	2	2004-02-02	6	00:00:00	09:16:00		4985		7			1	37.5	2	Matumbela	0	1	1	0	0	0
1245	44	2004	2	2	2004-02-02	6	00:00:00	09:25:00		3505		1	3		1	37.3	2	Furvela	0	4	1	0	0	0
1248	44	2004	2	2	2004-02-02	6	00:00:00	09:38:00		333		20			1	35.3	2	Furvela	0	1	1	0	0	0
521	19	2004	2	2	2004-02-02	6	00:00:00	10:16:00		3167		2	3		2		2	Furvela	0	3	1	0	0	0
523	19	2004	2	2	2004-02-02	6	00:00:00	10:33:00				18			2		2	Jogo	0	1	1	0	0	0
1249	44	2004	2	2	2004-02-02	6	1900-01-10	1900-01-10		295		4			1	39.1	2	Furvela	0	4	1	0	0	0
1239	44	2004	2	2	2004-02-02	6	08:56:00			5056		8			1	35.6	2	Barane									hospital
527	19	2004	2	3	2004-02-03	6	00:00:00	07:25:00		1962		0	10		1	36.6	2	Jogo	0	3	1	0	0	0
528	19	2004	2	3	2004-02-03	6	00:00:00	07:49:00				69			2		2	Furvela														TR
529	19	2004	2	3	2004-02-03	6	00:00:00	07:55:00		4978		29			1		2	Furvela	1	0	0	0	0	0
530	19	2004	2	3	2004-02-03	6	00:00:00	08:53:00		4991		1	4		2	35.3	2	Bovane	0	1	1	0	0	0
533	19	2004	2	3	2004-02-03	6	00:00:00	09:03:00		4994		19			1		2	Bovane	1	0	0	0	0	0
1010	36	2004	2	3	2004-02-03	6	00:00:00	09:07:00		4634		2	5		2	37.7	2	Furvela	0	3	1	0	0	0
1013	36	2004	2	3	2004-02-03	6	00:00:00	09:37:00		1896		2	2		2		2	Jogo	1	0	0	0	0	0
535	19	2004	2	3	2004-02-03	6	00:00:00	09:39:00		114		4			1	38.6	2	Furvela	1	0	0	0	0	0
536	19	2004	2	3	2004-02-03	6	00:00:00	10:16:00		4995		26			1		2	Furvela	1	0	0	0	0	0
539	19	2004	2	3	2004-02-03	6	00:00:00	11:11:00				11			2		2	Furvela	1	0	0	0	0	0
1017	36	2004	2	3	2004-02-03	6	00:00:00	12:17:00				2	10		2	40.1	2	jogo	0	3	1	0	0	0
542	19	2004	2	4	2004-02-04	6	00:00:00	07:45:00		4998		70			1		2	Inharumbo	1	0	0	0	0	0						resistente
543	19	2004	2	4	2004-02-04	6	00:00:00	07:52:00		4999		28			2		2	Furvela
545	19	2004	2	4	2004-02-04	6	00:00:00	07:58:00		6001		27			1		2	Furvela	0	3	1	0	0	0
547	19	2004	2	4	2004-02-04	6	00:00:00	08:01:00		6003		26			1		2	Jogo	0	1	1	0	0	0
546	19	2004	2	4	2004-02-04	6	00:00:00	08:08:00		6002		5			2	38.4	2	Jogo	0	1	1	0	0	0
548	19	2004	2	4	2004-02-04	6	00:00:00	08:25:00	08:25:00	6004		0	6		1	37.4	2	Jogo	0	1	1	0	0	0			hospital
549	19	2004	2	4	2004-02-04	6	00:00:00	08:28:00		6005		15			1		2	Jogo	1	0	0	0	0	0
494	18	2004	2	4	2004-02-04	6	00:00:00	08:35:00		2645		33			1		2	Furvela	1	0	0	0	0	0
496	18	2004	2	4	2004-02-04	6	00:00:00	08:39:00		1400		20			1	38.9	2	Furvela	0	1	1	0	0	0
497	18	2004	2	4	2004-02-04	6	00:00:00	08:41:00		6006		3			1		2	Matumbela	0	3	1	0	0	0
499	18	2004	2	4	2004-02-04	6	00:00:00	08:54:00		7784		1	2		2		2	Jogo	0	4	1	0	0	0
500	18	2004	2	4	2004-02-04	6	00:00:00	08:56:00		6007		10			2		2	Jogo	1	0	0	0	0	0
503	18	2004	2	4	2004-02-04	6	00:00:00	09:02:00				1	4		2	37.3	2	Wengue	0	3	1	0	0	0
504	18	2004	2	4	2004-02-04	6	00:00:00	09:22:00		6010		19			1		2	Jogo	0	1	1	0	0	0
505	18	2004	2	4	2004-02-04	6	00:00:00	09:25:00		6011		11			1	38.8	2	Furvela	1	0	0	0	0	0
506	18	2004	2	4	2004-02-04	6	00:00:00	09:27:00		6012		21			2		2	Furvela	0	1	1	0	0	0								TR
507	18	2004	2	4	2004-02-04	6	00:00:00	09:35:00		4150		20			2		2	Furvela	0	1	1	0	0	0
510	18	2004	2	4	2004-02-04	6	00:00:00	09:44:00		1705		11			2		2	Jogo	1	0	0	0	0	0
511	18	2004	2	4	2004-02-04	6	00:00:00	09:45:00		1707		21			2		2	Jogo	1	0	0	0	0	0
513	18	2004	2	4	2004-02-04	6	00:00:00	09:55:00				0	8		1	39.3	2	Furvela	0	5	1	0	0	0
518	18	2004	2	4	2004-02-04	6	00:00:00	10:05:00		131		37			1	36.9	2	Furvela	1	0	0	0	0	0
517	18	2004	2	4	2004-02-04	6	00:00:00	10:45:00		671		35			2		2	Furvela	0	3	1	0	0	0
519	18	2004	2	4	2004-02-04	6	00:00:00	10:55:00		3042		26			2		2	Furvela	1	0	0	0	0	0
469	17	2004	2	4	2004-02-04	6	00:00:00	11:03:00		1802		46			1		2	Jogo	0	1	1	0	0	0
468	17	2004	2	4	2004-02-04	6	00:00:00	11:22:00		6015		0	4				2	Jogo	1	0	0	0	0	0
471	17	2004	2	5	2004-02-05	6	00:00:00	07:04:00		4954		42			1	36	2	Furvela	1	0	0	0	0	0
476	17	2004	2	5	2004-02-05	6	00:00:00	08:03:00		6018		2	5		2	39.4	2	jogo	0	3	1	0	0	0
480	17	2004	2	5	2004-02-05	6	00:00:00	08:05:00	08:05:00	4740		0	10		1	38.2	2	Furvela	0	3	1	0	0	0			hospital
477	17	2004	2	5	2004-02-05	6	00:00:00	08:35:00		3059		2			2	38.4	2	Furvela	0	1	1	0	0	0								s
479	17	2004	2	5	2004-02-05	6	00:00:00	08:44:00				25			2		2	Jogo	1	0	0	0	0	0
482	17	2004	2	5	2004-02-05	6	00:00:00	09:06:00				1	8		2		2	Furvela	0	1	1	0	0	0
483	17	2004	2	5	2004-02-05	6	00:00:00	09:25:00		6019		2	4		2		2	Jogo	0	5	1	0	0	0
485	17	2004	2	5	2004-02-05	6	00:00:00	09:43:00				1	8		2	36.8	2	Matumbela	0	3	1	0	0	0
486	17	2004	2	5	2004-02-05	6	00:00:00	09:46:00	09:46:00			1	2		1	38.4	2	Furvela	0	4	1	0	0	0			hospital
487	17	2004	2	5	2004-02-05	6	00:00:00	09:55:00		1764		26			2		2	Matumbela	0	1	1	0	0	0
491	17	2004	2	5	2004-02-05	6	00:00:00	10:02:00		3390		1	4		1	38	2	Jogo	0	1	1	0	0	0
488	17	2004	2	5	2004-02-05	6	00:00:00	10:07:00		4946		1	7		2	37	2	jogo		3	1	0	0	0	97	504
490	17	2004	2	5	2004-02-05	6	00:00:00	10:15:00		189		60			1		2	Furvela	1	0	0	0	0	0
434	16	2004	2	5	2004-02-05	6	00:00:00	11:11:00		4205		3			2	38.6	2	Furvela	0	1	1	0	1	0
435	16	2004	2	5	2004-02-05	6	00:00:00	11:15:00		362		55			1		2	Jogo	0	1	1	0	0	0
436	16	2004	2	5	2004-02-05	6	00:00:00	11:44:00	11:44:00	1882		0	7		2	39.6	2	Furvela	0	5	1	0	0	0			hospital
439	16	2004	2	6	2004-02-06	6	00:00:00	07:45:00		6021		12			2		2	Bovane	0	3	1	0	0	0
440	16	2004	2	6	2004-02-06	6	00:00:00	07:52:00	07:52:00	5253		21			1		2	Jogo	1	0	0	0	0	0			hospital
441	16	2004	2	6	2004-02-06	6	00:00:00	07:58:00		266		4			2		2	Furvela	0	1	1	0	0	0
443	16	2004	2	6	2004-02-06	6	00:00:00	08:25:00		1722		0	8		2	35.9	2	Furvela	0	3	1	0	0	0
445	16	2004	2	6	2004-02-06	6	00:00:00	08:52:00		1243		27			2		2	Furvela
448	16	2004	2	6	2004-02-06	6	00:00:00	09:02:00		4937		2			1		2	Jogo	1	0	0	0	0	0
449	16	2004	2	6	2004-02-06	6	00:00:00	09:28:00		4858		35			1		2	Jogo	0	1	1	0	0	0
450	16	2004	2	6	2004-02-06	6	00:00:00	09:48:00		6025		2			1		2	Furvela	0	1	1	0	0	0
452	16	2004	2	6	2004-02-06	6	00:00:00	10:15:00	10:15:00			1	2		2		2	Matumbela									hospital
453	16	2004	2	6	2004-02-06	6	00:00:00	11:03:00		182		31			2		2	Furvela	0	3	1	0	0	0
442	16	2004	2	6	2004-02-06	6	1900-01-08	1900-01-08		6022		14			1		2	Furvela
454	16	2004	2	9	2004-02-09	7	00:00:00	07:44:00	07:44:00	6026		50			1		2	Jogo									hospital
456	16	2004	2	9	2004-02-09	7	00:00:00	08:04:00		3190		1	2		2	35.6	2	Chidanga	0	4	1	0	0	0
462	16	2004	2	9	2004-02-09	7	00:00:00	08:04:00		4693		4			1		2	Furvela	0	3	1	0	0	0
464	16	2004	2	9	2004-02-09	7	00:00:00	08:05:00		4064		56			1		2	Furvela	1	0	0	0	0	0
458	16	2004	2	9	2004-02-09	7	00:00:00	08:16:00		4328		1	6		1	38.6	2	Furvela	0	2	1	0	0	0
459	16	2004	2	9	2004-02-09	7	00:00:00	08:25:00		448		4			2		2	Furvela	0	3	1	0	0	0
463	16	2004	2	9	2004-02-09	7	00:00:00	08:45:00		5000		8			1		2	Matumbela	0	3	1	0	0	0
465	16	2004	2	9	2004-02-09	7	00:00:00	08:54:00		1949		24			1		2	Furvela	1	0	0	0	0	0
411	15	2004	2	9	2004-02-09	7	00:00:00	09:05:00				23			2		2	Nhaduca
405	15	2004	2	9	2004-02-09	7	00:00:00	09:16:00				1	3		2	38.6	2	Furvela	0	3	1	0	0	0
407	15	2004	2	9	2004-02-09	7	00:00:00	09:25:00		4148		1	5		2	35.9	2	Jogo	0	4	1	0	0	0
409	15	2004	2	9	2004-02-09	7	00:00:00	09:35:00		6030		70			1		2	xixe	1	0	0	0	0	0
410	15	2004	2	9	2004-02-09	7	00:00:00	09:43:00		6031		2	6		1		2	Jogo	0	5	1	0	0	0
412	15	2004	2	9	2004-02-09	7	00:00:00	09:54:00		4711		0	9		1	36.8	2	Furvela	0	3	1	0	0	0
413	15	2004	2	9	2004-02-09	7	00:00:00	09:58:00		1639		2			1		2	Furvela
416	15	2004	2	9	2004-02-09	7	00:00:00	10:02:00		5065		26			1		2	Jogo	0	1	1	0	0	0
415	15	2004	2	9	2004-02-09	7	00:00:00	10:06:00		6033		2	4		2	36	2	Bovane	0	4	1	0	0	0
417	15	2004	2	9	2004-02-09	7	00:00:00	10:29:00		4579		0	11		2		2	Furvela	0	1	1	0	0	0
418	15	2004	2	9	2004-02-09	7	00:00:00	10:31:00		3791		22			1		2	Matumbela	0	1	1	0	0	0
419	15	2004	2	9	2004-02-09	7	00:00:00	10:45:00		1963		18			2		2	Furvela	1	0	0	0	0	0
420	15	2004	2	9	2004-02-09	7	00:00:00	10:48:00		4823		0	4		2	36.6	2	Furvela	0	3	1	0	0	0
424	15	2004	2	9	2004-02-09	7	00:00:00	11:05:00				1	4		1		2	Jogo	0	5	1	0	0	0
425	15	2004	2	9	2004-02-09	7	00:00:00	11:29:00		6034		0	6		1	35.6	2	Matumbela	0	1	1	0	0	0
414	15	2004	2	9	2004-02-09	7	1900-01-10	1900-01-10		6032		25			1		2	Jogo	1	0	0	0	0	0
430	15	2004	2	10	2004-02-10	7	00:00:00	07:46:00		4614		40			1		2	Jogo	0	3	1	0	0	0
394	14	2004	2	10	2004-02-10	7	00:00:00	11:33:00	11:33:00	5141		11			1	36.4	2	Inharumbo	0	1	1	0	0	0			hospital
377	14	2004	2	10	2004-02-10	7	1900-01-10	1900-01-10		6041		2	8		1		2	Jogo	0	1	1	0	0	0
384	14	2004	2	10	2004-02-10	7	1900-01-10	1900-01-10		6044		33			2		2	Furvela	0	1	1	0	0	0
382	14	2004	2	10	2004-02-10	7	1900-01-10	1900-01-10		180		65			2		2	Jogo	0	1	1	0	0	0
376	14	2004	2	10	2004-02-10	7	1900-01-10	1900-01-10		6040		11			2		2	Jogo
397	14	2004	2	11	2004-02-11	7	00:00:00	08:02:00		1962		0	11		1	38.9	2	Furvela	0	3	1	0	0	0
398	14	2004	2	11	2004-02-11	7	00:00:00	08:25:00		4921		0	4		1		2	Furvela	0	4	1	0	0	0
399	14	2004	2	11	2004-02-11	7	00:00:00	08:43:00		6048		0	7		1	39.7	2	Jogo	0	5	1	0	0	0
401	14	2004	2	11	2004-02-11	7	00:00:00	08:54:00				51			2		2	Furvela
402	14	2004	2	11	2004-02-11	7	00:00:00	09:01:00		4743		0	6		2	36.3	2	Matumbela
403	14	2004	2	11	2004-02-11	7	00:00:00	09:12:00		4742		0	6		2	37.3	2	Matumbela	0	3	1	0	1	0								TR
358	13	2004	2	11	2004-02-11	7	1900-01-10	1900-01-10		2387		34			1	35.6	2	Furvela	1	0	0	0	0	0
353	13	2004	2	11	2004-02-11	7	1900-01-10	1900-01-10				1	9			38.6	2	C. Maputo	0	3	1	0	0	0
355	13	2004	2	11	2004-02-11	7	1900-01-10	1900-01-10		3669		1	5		2		2	Jogo	0	3	1	0	0	0
356	13	2004	2	11	2004-02-11	7	1900-01-10	1900-01-10				13			1	38.7	2	Jogo	0	3	1	0	0	0
352	13	2004	2	11	2004-02-11	7	1900-01-10	1900-01-10				24			1	36.9	2	Jogo	0	1	1	0	0	0							trap
357	13	2004	2	11	2004-02-11	7	1900-01-10	1900-01-10		6052		15			2		2	Furvela
348	13	2004	2	11	2004-02-11	7	1900-01-11	1900-01-11		6049		25			1		2	Jogo	1	0	0	0	0	0
349	13	2004	2	11	2004-02-11	7	1900-01-11	1900-01-11		4621		1	11		2	36.6	2	Furvela	0	1	1	0	0	0
350	13	2004	2	11	2004-02-11	7	1900-01-11	1900-01-11		6050		9			2		2	Furvela	0	1	1	0	0	0
665	24	2004	2	12	2004-02-12	7	00:00:00	10:35:00		6055		33			1		2	Furvela	1	0	0	0	0	0
667	24	2004	2	12	2004-02-12	7	00:00:00	11:01:00		5027		0	3		2	36.9	2	Furvela	1	0	0	0	0	0
669	24	2004	2	12	2004-02-12	7	00:00:00	11:05:00		341		24			2	37.2	2	Jogo	0	1	1	0	0	0
668	24	2004	2	12	2004-02-12	7	00:00:00	11:16:00		3189		1	9		2	36.1	2	Furvela	0	5	1	0	0	0
368	13	2004	2	12	2004-02-12	7	1900-01-10	1900-01-10		4487		0	9		2	36.3	2	Furvela	1	0	0	0	0	0
374	13	2004	2	12	2004-02-12	7	1900-01-10	1900-01-10		5017		4			2		2	Furvela	1	0	0	0	0	0
369	13	2004	2	12	2004-02-12	7	1900-01-10	1900-01-10				20			1		2	Jogo	1	0	0	0	0	0
372	13	2004	2	12	2004-02-12	7	1900-01-10	1900-01-10		5068		0	3		1	38.4	2	Jogo	0	3	1	0	0	0
370	13	2004	2	12	2004-02-12	7	1900-01-10	1900-01-10		6053		1	4		2		2	Furvela	0	5	1	0	0	0
364	13	2004	2	12	2004-02-12	7	1900-01-10	1900-01-10				2	11		1		2	bovane	0	3	1	0	0	0
363	13	2004	2	12	2004-02-12	7	1900-01-10	1900-01-10		6000		34			1		2	Furvela	0	1	1	0	0	0
373	13	2004	2	12	2004-02-12	7	1900-01-10	1900-01-10		1973		3			2	37.4	2	Furvela									hospital
677	24	2004	2	13	2004-02-13	7	00:00:00	09:01:00		6060		21			1		2	Matumbela	0	1	1	0	0	0
682	24	2004	2	13	2004-02-13	7	00:00:00	10:03:00				37			1		2	Furvela	0	3	1	0	0	0						resistente
683	24	2004	2	13	2004-02-13	7	00:00:00	10:37:00		203		4			2	35.4	2	Furvela	0	1	1	0	0	0
685	24	2004	2	13	2004-02-13	7	00:00:00	11:11:00		3823		16			2		2	Wengue	0	1	1	0	0	0
686	24	2004	2	16	2004-02-16	8	00:00:00	07:04:00		4021		23			2	35.3	2	Matumbela	1	0	0	0	0	0
687	24	2004	2	16	2004-02-16	8	00:00:00	07:46:00		6064		28			2		2	Furvela	0	1	1	0	0	0
688	24	2004	2	16	2004-02-16	8	00:00:00	07:49:00		4956		70			2		2	Inharumbo
635	23	2004	2	16	2004-02-16	8	00:00:00	08:05:00		4804		22			1	35.2	2	Furvela	1	0	0	0	0	0
638	23	2004	2	16	2004-02-16	8	00:00:00	09:14:00	09:14:00	1264		15			1	37	2	Furvela	0	1	1	0	0	0			hospital
640	23	2004	2	16	2004-02-16	8	00:00:00	10:45:00				10			1	38.1	2	Furvela	0	1	1	0	0	0
641	23	2004	2	16	2004-02-16	8	00:00:00	10:55:00		3933		11			2	36.2	2	Furvela	0	1	1	0	0	0
642	23	2004	2	16	2004-02-16	8	00:00:00	10:59:00		6067		0	5		2	37.5	2	Furvela	0	1	1	0	0	0
645	23	2004	2	16	2004-02-16	8	00:00:00	11:03:00				2	2		2	37.9	2	jogo	0	4	1	0	0	0
643	23	2004	2	16	2004-02-16	8	00:00:00	11:11:00		3579		1	8		2	39.3	2	Matumbela	0	5	1	0	0	0
646	23	2004	2	16	2004-02-16	8	00:00:00	11:36:00		4898		20			1		2	Jogo									hospital
690	24	2004	2	16	2004-02-16	8	1900-01-08	1900-01-08		3003		1	9		2	36.8	2	Matumbela	0	3	1	0	0	0
647	23	2004	2	17	2004-02-17	8	00:00:00	07:55:00		6069		0	7		2	39.3	2	Jogo	0	1	1	0	0	0
649	23	2004	2	17	2004-02-17	8	00:00:00	08:08:00		6071		7			2	37.2	2	Jogo	1	0	0	0	0	0
650	23	2004	2	17	2004-02-17	8	00:00:00	08:15:00		4779		0	11		1	38.6	2	Furvela	0	1	1	0	0	0
651	23	2004	2	17	2004-02-17	8	00:00:00	08:18:00		6072		1			1	38.1	2	Jogo	0	5	1	0	0	0
652	23	2004	2	17	2004-02-17	8	00:00:00	08:28:00		1794		19			1		2	Psaela
659	23	2004	2	17	2004-02-17	8	00:00:00	09:04:00		675		0	4		2	35.5	2	Vala	0	3	1	0	0	0
662	23	2004	2	17	2004-02-17	8	00:00:00	09:05:00		182		31			1		2	Furvela	0	4	1	0	0	0
657	23	2004	2	17	2004-02-17	8	00:00:00	09:07:00		141		27			1		2	Furvela	1	0	0	0	0	0
658	23	2004	2	17	2004-02-17	8	00:00:00	09:32:00		1897		1	1		2	38.8	2	Furvela	0	5	1	0	0	0
660	23	2004	2	17	2004-02-17	8	00:00:00	09:44:00		29		7			1		2	Furvela	1	0	0	0	0	0
661	23	2004	2	17	2004-02-17	8	00:00:00	09:45:00		4021		1	1		2	36.9	2	Furvela
602	22	2004	2	17	2004-02-17	8	00:00:00	10:02:00		6076		11			1	35.6	2	Furvela	0	1	1	0	0	0
605	22	2004	2	17	2004-02-17	8	00:00:00	10:03:00		3230		60			1		2	Furvela	0	1	1	0	0	0
606	22	2004	2	17	2004-02-17	8	00:00:00	10:04:00	10:04:00	6031		2	6		1	35.2	2	Abundo2	0	3	1	0	0	0			Hospital
607	22	2004	2	17	2004-02-17	8	00:00:00	10:05:00		6078		21			1		2	Furvela	1	0	0	0	0	0
604	22	2004	2	17	2004-02-17	8	00:00:00	10:25:00		4360		0	9		1	35.8	2	Matumbela	0	1	1	0	0	0
610	22	2004	2	17	2004-02-17	8	00:00:00	11:03:00		1662		14			2		2	Jogo
612	22	2004	2	17	2004-02-17	8	00:00:00	11:05:00	11:05:00	668		10			1	39.4	2	Furvela	0	1	1	0	0	0			hospital
609	22	2004	2	17	2004-02-17	8	00:00:00	11:17:00		3190		1	1			35.9	2	Jogo
614	22	2004	2	18	2004-02-18	8	00:00:00	07:55:00		4605		41			2	39.1	2	Furvela	0	1	1	0	0	0
616	22	2004	2	18	2004-02-18	8	00:00:00	08:04:00				1			2	36.7	2	Matumbela	0	5	1	0	0	0
617	22	2004	2	18	2004-02-18	8	00:00:00	08:08:00		6080		26			1		2	Jogo	1	0	0	0	0	0
618	22	2004	2	18	2004-02-18	8	00:00:00	08:13:00				25			1	35.8	2	Inharumbo	1	0	0	0	0	0
619	22	2004	2	18	2004-02-18	8	00:00:00	08:15:00				1	6		1	36.1	2	Furvela	0	1	1	0	0	0
622	22	2004	2	18	2004-02-18	8	00:00:00	08:32:00				30			2		2	Furvela
625	22	2004	2	18	2004-02-18	8	00:00:00	09:03:00				20			1		2	Furvela
627	22	2004	2	18	2004-02-18	8	00:00:00	09:42:00		6083		5	3		2	36.7	2	Jogo	0	1	1	0	0	0
631	22	2004	2	18	2004-02-18	8	00:00:00	10:29:00		5546		60			1	35.8	2	Nhabundo 2	0	3	1	0	0	0
632	22	2004	2	18	2004-02-18	8	00:00:00	10:48:00		23223		36			1		2	Furvela	1	0	0	0	0	0
578	21	2004	2	18	2004-02-18	8	00:00:00	11:16:00		5021		2			1	37.4	2	Furvela	0	1	1	0	0	0
579	21	2004	2	18	2004-02-18	8	00:00:00	11:27:00		6047		6	11		2	37.1	2	Furvela	0	1	1	0	0	0
615	22	2004	2	18	2004-02-18	8	1900-01-08	1900-01-08		5149		15			1		2	Jogo	1	0	0	0	0	0
628	22	2004	2	18	2004-02-18	8	1900-01-10	1900-01-10		3760		2	4		1		2	Jogo	0	4	1	0	0	0			hospital
581	21	2004	2	19	2004-02-19	8	00:00:00	07:56:00		2975		1	8		1		2	Furvela	0	5	1	0	0	0
582	21	2004	2	19	2004-02-19	8	00:00:00	08:01:00		6087		45			1		2	Furvela	1	0	0	0	0	0
583	21	2004	2	19	2004-02-19	8	00:00:00	08:34:00				5			1	38	2	Furvela	0	3	1	0	0	0
586	21	2004	2	19	2004-02-19	8	00:00:00	09:01:00		1479		34			1		2	Bovane	0	1	1	0	1	0
588	21	2004	2	19	2004-02-19	8	00:00:00	09:02:00		6089		16			1		2	Furvela	1	0	0	0	0	0
585	21	2004	2	19	2004-02-19	8	00:00:00	09:04:00	09:04:00			8			2		2	Furvela	0	1	1	0	0	0			hospital
593	21	2004	2	19	2004-02-19	8	00:00:00	09:04:00		5026		18			1		2	Matumbela
587	21	2004	2	19	2004-02-19	8	00:00:00	09:14:00		618		22			1		2	Bovane	0	4	1	0	0	0
596	21	2004	2	19	2004-02-19	8	00:00:00	10:01:00		1411		39			1		2	Jogo	1	0	0	0	0	0
597	21	2004	2	19	2004-02-19	8	00:00:00	10:03:00		6057		0	5		1	35.9	2	Matumbela	0	4	1	0	0	0
599	21	2004	2	19	2004-02-19	8	00:00:00	11:28:00				46			2		2	Furvela
601	21	2004	2	19	2004-02-19	8	00:00:00	12:18:00		1668		22			2	35.8	2	Furvela	1	0	0	0	0	0
550	20	2004	2	20	2004-02-20	8	00:00:00	07:47:00				36			2		2	Furvela	1	0	0	0	0	0
551	20	2004	2	20	2004-02-20	8	00:00:00	07:57:00		6094		15			2		2	Jogo	1	0	0	0	0	0
552	20	2004	2	20	2004-02-20	8	00:00:00	08:02:00		23151		10			2		2	Jogo	0	1	1	0	0	0
556	20	2004	2	20	2004-02-20	8	00:00:00	08:04:00		1274		32			1		2	M´bene	1	0	0	0	0	0
553	20	2004	2	20	2004-02-20	8	00:00:00	08:27:00		1729		61			1		2	Furvela	0	4	1	0	0	0
554	20	2004	2	20	2004-02-20	8	00:00:00	08:35:00				0	5		1	38.4	2	Furvela	0	4	1	0	0	0
559	20	2004	2	20	2004-02-20	8	00:00:00	09:01:00		6095		0	7		2	35.6	2	Mahangue	0	4	1	0	0	0
564	20	2004	2	20	2004-02-20	8	00:00:00	09:05:00				2			2	34.9	2	Jogo	0	1	1	1	0	0	0	0
562	20	2004	2	20	2004-02-20	8	00:00:00	09:37:00		6098		56			1		2	Matumbela
563	20	2004	2	20	2004-02-20	8	00:00:00	09:47:00		468		16			1		2	Furvela	1	0	0	0	0	0
567	20	2004	2	20	2004-02-20	8	00:00:00	11:35:00		4304		27			1		2	Singa	0	1	1	0	0	0
568	20	2004	2	20	2004-02-20	8	00:00:00	11:45:00		6099		17			1		2	Furvela
565	20	2004	2	20	2004-02-20	8	1900-01-10	1900-01-10		4808		0	4		1	38.8	2	Matumbela	1	0	0	0	0	0
570	20	2004	2	23	2004-02-23	9	00:00:00	07:45:00				56			1	35.7	2	Jogo	0	3	1	0	0	0
571	20	2004	2	23	2004-02-23	9	00:00:00	07:47:00		599		28			2		2	Matumbela	1	0	0	0	0	0
573	20	2004	2	23	2004-02-23	9	00:00:00	07:58:00		6066		0	4		2	36.8	2	Jogo	0	5	1	0	0	0
574	20	2004	2	23	2004-02-23	9	00:00:00	08:04:00		6101		1	2		1	36	2	Inharumbo
694	25	2004	2	23	2004-02-23	9	00:00:00	08:27:00		417		39			2		2	Furvela	1	0	0	0	0	0						resistente
697	25	2004	2	23	2004-02-23	9	00:00:00	08:52:00		4825		0	7		1	39.8	2	Jogo	0	4	1	0	0	0
698	25	2004	2	23	2004-02-23	9	00:00:00	08:58:00		3225		24			2		2	Furvela
700	25	2004	2	23	2004-02-23	9	00:00:00	09:02:00		1831		0	4		2	39.3	2	Furvela	0	3	1	0	0	0						control
701	25	2004	2	23	2004-02-23	9	00:00:00	09:03:00		4109		1	2		2	36.7	2	Furvela	0	1	1	0	0	0
702	25	2004	2	23	2004-02-23	9	00:00:00	09:18:00		4762		50			1	36.6	2		0	1	1	0	0	0
705	25	2004	2	23	2004-02-23	9	00:00:00	09:29:00		5244		22			1	36	2	Furvela	0	3	1	0	0	0
706	25	2004	2	23	2004-02-23	9	00:00:00	09:32:00		5208		18			1		2	Furvela	1	0	0	0	0	0
709	25	2004	2	23	2004-02-23	9	00:00:00	10:04:00		6102		32			2	35.7	2	Furvela	0	1	1	0	0	0
710	25	2004	2	23	2004-02-23	9	00:00:00	10:47:00		4014		2			1	37	2	Jogo	1	0	0	0	0	0
711	25	2004	2	23	2004-02-23	9	00:00:00	10:58:00				3			2	35.9	2	Furvela	0	4	1	0	0	0
699	25	2004	2	23	2004-02-23	9	1900-01-09	1900-01-09		88		16			1		2	Matumbela	0	1	1	0	0	0			hospital
708	25	2004	2	23	2004-02-23	9	1900-01-10	1900-01-10		414		14			2		2	Furvela	0	3	1	0	0	0
713	25	2004	2	24	2004-02-24	9	00:00:00	07:45:00		4604		0	6		2	40.2	2	C. Maputo									hospital
718	25	2004	2	24	2004-02-24	9	00:00:00	08:02:00		6075		0	4		2	38.8	2	Furvela	0	1	1	0	0	0
734	26	2004	2	25	2004-02-25	9	00:00:00	07:03:00	07:03:00	2975		1	8		1		2	Furvela	1	0	0	0	0	0			hospital		urgente
741	26	2004	2	25	2004-02-25	9	00:00:00	08:15:00				29			1		2	Furvela	1	0	0	0	0	0
1187	42	2004	2	25	2004-02-25	9	00:00:00	10:05:00		6056		25			2		2	Furvela
740	26	2004	2	25	2004-02-25	9	1900-01-08	1900-01-08		6088		0	5		1	39.5	2	Jogo	0	4	1	0	0	0
1188	42	2004	2	26	2004-02-26	9	00:00:00	07:35:00		2		3	1		1	35.8	2	Furvela	0	4	1	0	0	0
1190	42	2004	2	26	2004-02-26	9	00:00:00	08:05:00		3910		1	9		1	37.1	2	Furvela	0	1	1	0	0	0
1192	42	2004	2	26	2004-02-26	9	00:00:00	08:25:00		3095		10			1	38.2	2	Furvela	0	1	1	0	0	0
1195	42	2004	2	26	2004-02-26	9	00:00:00	08:42:00		746		55			1		2	Bovane	0	2	1	0	0	0
1199	42	2004	2	26	2004-02-26	9	00:00:00	09:44:00		3251		52			2		2	Matumbela	1	0	0	0	0	0
1204	42	2004	2	26	2004-02-26	9	00:00:00	10:26:00		1899		0	9		2		2	Furvela	0	4	1	0	0	0
1206	43	2004	2	26	2004-02-26	9	00:00:00	10:54:00		6120		70			1	36.9	2	Xixe	0	3	1	0	0	0
1209	43	2004	2	26	2004-02-26	9	00:00:00	11:12:00		640		51			1		2	Furvela	1	0	0	0	0	0
1211	43	2004	2	26	2004-02-26	9	00:00:00	11:25:00		6124		51			1	36.5	2	Furvela	0	1	1	0	0	0
1212	43	2004	2	26	2004-02-26	9	00:00:00	11:28:00		3669		0	5		2	38.2	2	Furvela	0	3	1	0	0	0
1196	42	2004	2	26	2004-02-26	9	1900-01-09	1900-01-09		1962		0	10		2	38.6	2	Furvela	0	4	1	0	0	0
1202	42	2004	2	26	2004-02-26	9	1900-01-10	1900-01-10		6118		29			2	35.8	2	Jogo	0	4	1	0	0	0
1208	43	2004	2	26	2004-02-26	9	1900-01-11	1900-01-11		6122		11			1	35.7	2	Furvela	0	3	1	0	0	0
1213	43	2004	2	27	2004-02-27	9	00:00:00	07:58:00		6125		17			1		2	Furvela
1215	43	2004	2	27	2004-02-27	9	00:00:00	08:01:00		6126		7			1		2	Matumbela	0	1	1	0	0	0
1216	43	2004	2	27	2004-02-27	9	00:00:00	08:12:00		4390		0	9		1		2	Matumbela	0	3	1	0	0	0
1221	43	2004	2	27	2004-02-27	9	00:00:00	09:27:00		6128		23			2		2	Furvela	1	0	0	0	0	0
1224	43	2004	2	27	2004-02-27	9	00:00:00	10:15:00		634		3	5		2	38.1	2	Matumbela	0	3	1	0	0	0
1226	43	2004	2	28	2004-02-28	9	00:00:00	11:03:00		5269		0	4		1	37.3	2	Furvela									hospital
1039	37	2004	3	1	2004-03-01	10	00:00:00	08:05:00		5479		40			2		2	Furvela	0	3	1	0	0	0						resistente
1040	37	2004	3	1	2004-03-01	10	00:00:00	08:55:00		245		15			2	38.9	2	Bovane	0	1	1	0	0	0
1044	37	2004	3	1	2004-03-01	10	00:00:00	09:02:00		6129		0	3		2	35.5	2	Jogo	0	4	1	0	0	0
1042	37	2004	3	1	2004-03-01	10	00:00:00	09:09:00		5580		0	5		1		2	Matumbela									hospital
1045	37	2004	3	1	2004-03-01	10	00:00:00	09:24:00		6130		3			2	35.8	2	Matumbela	0	1	1	0	0	0
1046	37	2004	3	1	2004-03-01	10	00:00:00	09:32:00				5			1		2	Furvela	0	1	1	0	0	0
1047	37	2004	3	1	2004-03-01	10	00:00:00	09:37:00				7			2	36.6	2	Furvela	0	1	1	0	0	0
1050	37	2004	3	1	2004-03-01	10	00:00:00	10:06:00				8			1	37.4	2	Furvela	0	1	1	0	0	0
1052	37	2004	3	1	2004-03-01	10	00:00:00	10:25:00		266		4			2		2	Furvela	0	1	1	0	0	0
1053	37	2004	3	1	2004-03-01	10	00:00:00	10:28:00		5252		14			2	38.6	2	Furvela	1	0	0	0	0	0
1054	37	2004	3	1	2004-03-01	10	00:00:00	10:33:00		6137		19			2		2	Jogo
1018	36	2004	3	4	2004-03-04	10	00:00:00	07:04:00		6087		45			1	35.6	2	Furvela	1	0	0	0	0	0
1020	36	2004	3	4	2004-03-04	10	00:00:00	07:53:00		6148		5	4		2		2	Matumbela	1	0	0	0	0	0
1021	36	2004	3	4	2004-03-04	10	00:00:00	07:58:00		6141		2	11		1		2
1026	36	2004	3	4	2004-03-04	10	00:00:00	08:35:00				23			1		2	Jogo	0	1	1	0	0	0
1028	36	2004	3	4	2004-03-04	10	00:00:00	08:53:00		6144		0	5		1	35.8	2	Furvela	0	4	1	0	0	0								TR
1032	36	2004	3	4	2004-03-04	10	00:00:00	10:07:00		3669		1	8		1	37.3	2	Wengue	0	4	1	0	0	0
979	35	2004	3	4	2004-03-04	10	00:00:00	10:14:00		6034		0	6		1	36.5	2	Jogo	0	4	0	0	0	0
980	35	2004	3	4	2004-03-04	10	00:00:00	10:27:00		6145		25			2		2	Furvela	0	1	1	0	0	0
1022	36	2004	3	4	2004-03-04	10	1900-01-08	1900-01-08		6142		4	7		1		2	Jogo	0	1	1	0	0	0
986	35	2004	3	5	2004-03-05	10	00:00:00	09:04:00		96		3	5		2	37.2	2	Furvela	1	0	0	0	0	0
987	35	2004	3	5	2004-03-05	10	00:00:00	09:05:00		6148		0	5		2	38.6	2	Chidanga	0	3	1	0	0	0
985	35	2004	3	5	2004-03-05	10	00:00:00	09:14:00				3			2		2	Matumbela
991	35	2004	3	5	2004-03-05	10	00:00:00	10:03:00				4			2	37.8	2	Bovane	1	0	0	0	0	0
990	35	2004	3	5	2004-03-05	10	00:00:00	10:25:00				2	2		1	35.6	2	Jogo
992	35	2004	3	5	2004-03-05	10	00:00:00	10:37:00		4574		0	7		1	37	2	Jogo	0	1	1	1	0	0	0	0						TR
993	35	2004	3	5	2004-03-05	10	00:00:00	10:43:00		1741		4			2	36.9	2	Furvela
994	35	2004	3	5	2004-03-05	10	00:00:00	10:53:00		6149		1	6		1		2	Matumbela	0	3	1	0	0	0
996	35	2004	3	5	2004-03-05	10	00:00:00	11:02:00				2			1	39	2	Matumbela	0	4	1	0	0	0
988	35	2004	3	5	2004-03-05	10	1900-01-10	1900-01-10		1722		0	9		2	37.5	2	Furvela	0	3	1	0	0	0
1000	35	2004	3	8	2004-03-08	11	00:00:00	07:44:00		936		9			2	38.2	2	Furvela	0	1	1	0	0	0			hospital
1001	35	2004	3	8	2004-03-08	11	00:00:00	07:52:00				0	4		1		2	Furvela	1	0	0	0	0	0
1002	35	2004	3	8	2004-03-08	11	00:00:00	07:58:00		4180		1	5		2	36.4	2	Furvela	0	4	1	0	0	0
1007	35	2004	3	8	2004-03-08	11	00:00:00	08:05:00		1972		12			1		2	Wengue
1006	35	2004	3	8	2004-03-08	11	00:00:00	08:17:00		6075		0	5		2	36.5	2	Jogo	1	0	0	0	0	0
953	34	2004	3	8	2004-03-08	11	00:00:00	09:04:00		4762		46			2		2	Furvela	0	1	1	0	0	0
957	34	2004	3	8	2004-03-08	11	00:00:00	10:16:00		6153		23			2		2	Matumbela
959	34	2004	3	8	2004-03-08	11	00:00:00	10:27:00				4			2		2	Furvela	0	1	1	0	0	0
960	34	2004	3	8	2004-03-08	11	00:00:00	10:38:00				9			2	37.7	2	Furvela	1	0	0	0	0	0
964	34	2004	3	9	2004-03-09	11	00:00:00	08:08:00		1747		5			1		2	Furvela	0	3	1	0	0	0
967	34	2004	3	9	2004-03-09	11	00:00:00	08:38:00		6131		0	1		1		2	Furvela	1	0	0	0	0	0
969	34	2004	3	9	2004-03-09	11	00:00:00	09:35:00		29		7			1	37.8	2	Furvela	0	1	1	0	0	0
970	34	2004	3	9	2004-03-09	11	00:00:00	09:49:00		4831		5			2		2	Jogo
926	33	2004	3	10	2004-03-10	11	00:00:00	08:01:00				2	3		2	36	2	Bovane
930	33	2004	3	10	2004-03-10	11	00:00:00	08:35:00		59		41			1		2	Furvela	0	3	1	0	0	0
932	33	2004	3	10	2004-03-10	11	00:00:00	08:58:00		1920		0	5		1	37.1	2	Furvela	1	0	0	0	0	0
938	33	2004	3	10	2004-03-10	11	00:00:00	09:05:00				1	10		1		2	Furvela	0	3	1	0	0	0
934	33	2004	3	10	2004-03-10	11	00:00:00	09:22:00		3157		1	1		1	36.3	2	Furvela
935	33	2004	3	10	2004-03-10	11	00:00:00	09:27:00		701		3			1	39.3	2	Furvela	0	1	1	0	0	0
940	33	2004	3	10	2004-03-10	11	00:00:00	10:04:00		6159		1	7		2	37.4	2	Jogo	0	1	1	0	0	0
945	33	2004	3	10	2004-03-10	11	00:00:00	10:05:00		2718		2	6		1	37.3	2	nharrumbo	0	3	1	0	0	0
946	33	2004	3	10	2004-03-10	11	00:00:00	10:53:00		1057		3	4		2	36.8	2	Furvela	0	1	1	0	0	0
948	33	2004	3	10	2004-03-10	11	00:00:00	11:34:00		4695		0	5		2	35.6	2	Furvela														s
950	33	2004	3	11	2004-03-11	11	00:00:00	08:05:00				1	1		2	39.7	2	Chidanga	0	5	1	0	0	0
899	32	2004	3	11	2004-03-11	11	00:00:00	10:02:00				4			1		2	Furvela	0	3	1	0	0	0
902	32	2004	3	11	2004-03-11	11	00:00:00	10:04:00				3	6		2	38.8	2	jogo	0	4	1	0	0	0
951	33	2004	3	11	2004-03-11	11	00:00:00	10:12:00		96		0	3		2	36.4	2	Jogo	0	1	1	0	0	0
900	32	2004	3	11	2004-03-11	11	00:00:00	10:27:00		6162		37			1	36.1	2	Furvela	1	0	0	0	0	0
906	32	2004	3	11	2004-03-11	11	00:00:00	11:11:00		6163		0	7		1		2	Wengue
905	32	2004	3	11	2004-03-11	11	1900-01-11	1900-01-11		4109		1	3		1	35.9	2	Furvela	0	1	1	0	0	0
915	32	2004	3	12	2004-03-12	11	00:00:00	09:05:00		5254		9			2		2	Matumbela	0	1	1	0	0	0
916	32	2004	3	12	2004-03-12	11	00:00:00	09:54:00		1906		2			2	35.7	2	Furvela	1	0	0	0	0	0
917	32	2004	3	15	2004-03-15	12	00:00:00	07:52:00		5027		0	4		2	38.2	2	Jogo	0	3	1	0	0	0						control
920	32	2004	3	15	2004-03-15	12	00:00:00	08:01:00		6167		14			1		2	Furvela	1	0	0	0	0	0
923	32	2004	3	15	2004-03-15	12	00:00:00	08:04:00		6168		35			1		2	Furvela	1	0	0	0	0	0
919	32	2004	3	15	2004-03-15	12	00:00:00	08:08:00				3	1		2		2	Matumbela	0	5	1	0	0	0
924	32	2004	3	15	2004-03-15	12	00:00:00	08:52:00		6169		0	11		2	36.8	2	Furvela	0	5	1	0	0	0
925	32	2004	3	15	2004-03-15	12	00:00:00	08:55:00		6148		0	5		1	38.7	2	Ulos	0	5	1	0	0	0
876	31	2004	3	15	2004-03-15	12	00:00:00	10:27:00		6170		54			2		2	Furvela	1	0	0	0	0	0
918	32	2004	3	15	2004-03-15	12	1900-01-08	1900-01-08		4668		49			1		2	Furvela	1	0	0	0	0	0
883	31	2004	3	16	2004-03-16	12	00:00:00	07:55:00		6175		55			1		2	Jogo	0	1	1	0	0	0
885	31	2004	3	16	2004-03-16	12	00:00:00	08:02:00		6176		42			2		2	Jogo	0	1	1	0	0	0
884	31	2004	3	16	2004-03-16	12	00:00:00	08:12:00		5374		21			1		2	Jogo
892	31	2004	3	16	2004-03-16	12	00:00:00	09:14:00		700		8			1	36.2	2	Furvela	1	0	0	0	0	0
893	31	2004	3	16	2004-03-16	12	00:00:00	09:16:00		3243		2	4		1	35.7	2	Jogo	0	1	1	0	0	0
840	30	2004	3	16	2004-03-16	12	00:00:00	10:38:00				22			2		2	Furvela	0	1	1	0	0	0
844	30	2004	3	16	2004-03-16	12	1900-01-11	1900-01-11				36			1		2	Matumbela	0	1	1	0	0	0
848	30	2004	3	17	2004-03-17	12	00:00:00	08:02:00		6182		32			2		2	Jogo	0	1	1	0	0	0
850	30	2004	3	17	2004-03-17	12	00:00:00	08:58:00		1343		32			1		2	Jogo	0	1	1	0	0	0
852	30	2004	3	17	2004-03-17	12	00:00:00	09:25:00		1227		34			1		2	Furvela	0	1	1	0	0	0
853	30	2004	3	17	2004-03-17	12	00:00:00	09:57:00				25			2		2	Jogo	0	3	1	0	0	0
854	30	2004	3	17	2004-03-17	12	00:00:00	10:05:00				0	8		2	37	2	Jogo	0	1	1	0	0	0
855	30	2004	3	17	2004-03-17	12	00:00:00	10:16:00				2			1	39	2	Matumbela	1	0	0	0	0	0
861	30	2004	3	18	2004-03-18	12	00:00:00	08:27:00		306		24			1	36.6	2	Jogo	0	1	1	0	0	0
869	30	2004	3	18	2004-03-18	12	00:00:00	09:48:00		73		74			2		2	Furvela	1	0	0	0	0	0
812	29	2004	3	18	2004-03-18	12	00:00:00	10:05:00				1	4		2	37.7	2	Matumbela	0	3	1	0	0	0						control
815	29	2004	3	18	2004-03-18	12	00:00:00	11:37:00		4516		0	10		2	37.9	2	Furvela	0	1	1	0	3	0
813	29	2004	3	18	2004-03-18	12	1900-01-11	1900-01-11		6186		27			2	37.5	2	Furvela	1	0	0	0	0	0
816	29	2004	3	19	2004-03-19	12	00:00:00	07:05:00		4579		1			1	38.2	2	Furvela	0	3	1	0	0	0
817	29	2004	3	19	2004-03-19	12	00:00:00	08:03:00				3	6		1		2	Furvela	0	1	1	0	0	0
820	29	2004	3	19	2004-03-19	12	00:00:00	11:35:00		30		5			2	38.4	2	Furvela	1	0	0	0	0	0
826	29	2004	3	22	2004-03-22	13	00:00:00	08:16:00				26			1		2	Jogo	1	0	0	0	0	0
828	29	2004	3	22	2004-03-22	13	00:00:00	08:53:00		4924		0	10		1		2	Furvela	1	0	0	0	0	0
830	29	2004	3	22	2004-03-22	13	00:00:00	09:14:00		2378		3	1		2	36.6	2	Furvela	1	0	0	0	0	0
831	29	2004	3	22	2004-03-22	13	00:00:00	09:16:00				4	7		2	39.8	2	Jogo	0	1	1	0	0	0
834	29	2004	3	22	2004-03-22	13	00:00:00	09:53:00		6193		1	1		1	35.6	2	Matumbela	0	1	1	0	3	0
837	29	2004	3	22	2004-03-22	13	00:00:00	10:28:00		508		33			2		2	Vala
829	29	2004	3	22	2004-03-22	13	1900-01-09	1900-01-09		6120		16			2		2	Furvela
777	28	2004	3	23	2004-03-23	13	00:00:00	07:04:00				47			1		2	Furvela	1	0	0	0	0	0
778	28	2004	3	23	2004-03-23	13	00:00:00	07:46:00				2	8		1	36.7	2	Furvela	1	0	0	0	0	0
779	28	2004	3	23	2004-03-23	13	00:00:00	08:02:00		6075		0	5		1	36.7	2	Vala	0	4	1	0	0	0
781	28	2004	3	23	2004-03-23	13	00:00:00	08:53:00				1	3		2	37.9	2	Furvela	0	3	1	0	0	0
784	28	2004	3	23	2004-03-23	13	00:00:00	10:05:00		6196		2			2	36.8	2	Wengue	0	1	1	0	0	0
785	28	2004	3	23	2004-03-23	13	00:00:00	10:53:00		6197		50			1		2	Matumbela	0	1	1	0	0	0
787	28	2004	3	24	2004-03-24	13	00:00:00	07:55:00		6198		0	2		2	38	2	Jogo	0	3	1	0	0	0
789	28	2004	3	24	2004-03-24	13	00:00:00	08:58:00		6199		4			2	34.6	2	Jogo	0	1	1	0	0	0
791	28	2004	3	24	2004-03-24	13	00:00:00	09:03:00				48			2		2	jogo	1	0	0	0	0	0
790	28	2004	3	24	2004-03-24	13	1900-01-09	1900-01-09		3006		62			2		2	Furvela	1	0	0	0	0	0
798	28	2004	3	25	2004-03-25	13	00:00:00	07:54:00		6182		32			1		2	Furvela	0	1	1	0	0	0								s
799	28	2004	3	25	2004-03-25	13	00:00:00	07:56:00				5			1		2	Jogo	0	1	1	0	0	0
801	28	2004	3	25	2004-03-25	13	00:00:00	08:17:00		6202		24			1		2	Jogo	1	0	0	0	0	0
744	27	2004	3	25	2004-03-25	13	00:00:00	09:02:00		3132		1	1		2	39.1	2	Furvela	0	3	1	0	0	0
749	27	2004	3	25	2004-03-25	13	00:00:00	10:03:00		6208		2			1		2	Vala	0	1	1	0	3	0
750	27	2004	3	25	2004-03-25	13	00:00:00	10:35:00		6209		2			2	37.4	2	Vala	1	0	0	0	0	0
747	27	2004	3	25	2004-03-25	13	1900-01-10	1900-01-10				4	6		2		2	Jogo	1	0	0	0	0	0
751	27	2004	3	26	2004-03-26	13	00:00:00	07:55:00		431		12			2		2	Jogo	0	1	1	0	0	0
755	27	2004	3	26	2004-03-26	13	00:00:00	10:05:00		23		64			1	36.7	2	Furvela
754	27	2004	3	26	2004-03-26	13	1900-01-10	1900-01-10				0	11		1	37	2	Vala	0	1	1	0	0	0
756	27	2004	3	29	2004-03-29	14	00:00:00	07:05:00		6115		54			2		2	Furvela	0	1	1	0	0	0
760	27	2004	3	29	2004-03-29	14	00:00:00	09:19:00		6213		0	3		1	37.1	2	Jogo	0	4	1	0	0	0
758	27	2004	3	29	2004-03-29	14	1900-01-09	1900-01-09		6212		20			1		2	Matumbela
765	27	2004	3	30	2004-03-30	14	00:00:00	08:49:00		6146		18			1		2	Furvela	1	0	0	0	0	0
770	27	2004	3	30	2004-03-30	14	00:00:00	09:05:00		18		5			2		2	Furvela	0	1	1	0	0	0
767	27	2004	3	30	2004-03-30	14	00:00:00	09:28:00		1660		1	11		1	36.7	2	Jogo	0	4	1	0	0	0
768	27	2004	3	30	2004-03-30	14	00:00:00	09:35:00		310		4			1	37.5	2	Furvela	0	1	1	0	0	0
771	27	2004	3	30	2004-03-30	14	00:00:00	09:55:00		6215		0	1		2	35.7	2	Furvela	0	1	1	0	0	0
773	27	2004	3	30	2004-03-30	14	00:00:00	10:02:00		3888		1			1	38.4	2	Furvela	0	3	1	0	0	0
774	27	2004	3	30	2004-03-30	14	00:00:00	10:04:00				2	7		2	38.2	2	Furvela	0	4	1	0	0	0
1119	40	2004	4	1	2004-04-01	14	00:00:00	08:04:00		4743		0	7		2	39.1	2	Matumbela	0	1	1	0	0	0
1120	40	2004	4	1	2004-04-01	14	00:00:00	08:05:00				2	8		2	40.1	2	Furvela	0	5	1	0	0	0
1121	40	2004	4	1	2004-04-01	14	00:00:00	09:27:00		6217		70			1		2	Wengue									hospital
1125	40	2004	4	1	2004-04-01	14	00:00:00	10:01:00		6207		0	5		2	37.9	2	Matumbela	0	4	1	0	0	0
1129	40	2004	4	2	2004-04-02	14	00:00:00	08:55:00		4390		0	11		1		2	Furvela	1	0	0	0	0	0
1130	40	2004	4	2	2004-04-02	14	00:00:00	11:25:00				2			1	37.4	2	Inharime	0	3	1	0	0	0
1138	40	2004	4	6	2004-04-06	15	00:00:00	07:45:00		6189		3			2		2	Jogo	1	0	0	0	0	0
1140	40	2004	4	6	2004-04-06	15	00:00:00	08:04:00		6221		0	9			39.2	2	Inhabundo	0	1	1	0	0	0
1143	40	2004	4	6	2004-04-06	15	00:00:00	09:03:00		172		66			1		2	Furvela	1	0	0	0	0	0
1144	40	2004	4	6	2004-04-06	15	00:00:00	09:05:00		4706		0	9		1		2	Jogo	0	3	1	0	0	0
1145	40	2004	4	6	2004-04-06	15	00:00:00	09:53:00		6223		0	5		1		2	Vala	0	3	1	0	0	0
1147	40	2004	4	6	2004-04-06	15	00:00:00	10:25:00		4715		0	9		1		2	Furvela	0	1	1	0	0	0
1139	40	2004	4	6	2004-04-06	15	1900-01-08	1900-01-08		4869					1	36.8	2	Jogo	0	1	1	0	0	0
1146	40	2004	4	6	2004-04-06	15	1900-01-10	1900-01-10		6224		0	5		2		2	Jogo	0	3	1	0	0	0
1148	40	2004	4	7	2004-04-07	15	00:00:00	07:55:00		6225		14			1	36.6	2	Matumbela	0	1	1	0	0	0
1088	39	2004	4	8	2004-04-08	15	00:00:00	08:01:00		3132		1	11		1	39.6	2	Jogo	0	3	1	0	0	0
1087	39	2004	4	8	2004-04-08	15	00:00:00	08:08:00		6226		14			1		2	Furvela	0	3	1	0	0	0
1089	39	2004	4	8	2004-04-08	15	00:00:00	08:56:00		2010		5			2	35.6	2	Furvela	0	1	1	0	0	0
1092	39	2004	4	8	2004-04-08	15	00:00:00	09:45:00				0	8		1	37.9	2	Jogo	0	1	1	0	0	0
1095	39	2004	4	9	2004-04-09	15	00:00:00	08:55:00				71			1		2	Jogo	1	0	0	0	0	0
1096	39	2004	4	9	2004-04-09	15	1900-01-10	1900-01-10				0	7		2		2	Furvela	0	4	1	0	0	0
1100	39	2004	4	12	2004-04-12	16	00:00:00	10:01:00				2	3		2		2		1	0	0	0	0	0
1103	39	2004	4	12	2004-04-12	16	00:00:00	10:04:00		4782		74			1		2	Furvela	1	0	0	0	0	0
1101	39	2004	4	12	2004-04-12	16	00:00:00	10:18:00		197		8			1		2	Furvela	0	1	1	0	0	0
1108	39	2004	4	12	2004-04-12	16	00:00:00	11:04:00		5490		61			1		2	Furvela									hospital
1106	39	2004	4	12	2004-04-12	16	1900-01-11	1900-01-11		2062		11			1		2	Furvela	1	0	0	0	0	0
1114	39	2004	4	13	2004-04-13	16	00:00:00	11:07:00		6232		0	3		1	34.4	2	Jogo	0	3	1	0	0	0
1156	42	2004	4	16	2004-04-16	16	00:00:00	11:08:00		4021		1	3		2	35.6	2	Jogo	0	3	1	0	0	0
1157	42	2004	4	16	2004-04-16	16	00:00:00	12:11:00		6238		1	9		1		2	Furvela	0	1	1	0	0	0
1152	42	2004	4	16	2004-04-16	16	1900-01-09	1900-01-09		6236		52			1	37.6	2	Jogo	1	0	0	0	0	0
1161	42	2004	4	19	2004-04-19	17	00:00:00	08:27:00		6241		0	4		2	39	2	Jogo	0	3	1	0	0	0
1164	42	2004	4	19	2004-04-19	17	00:00:00	10:01:00		6148		0	6		2	37.6	2	Vala	0	4	1	0	0	0			hospital
1159	42	2004	4	19	2004-04-19	17	1900-01-08	1900-01-08		6239		22			1		2	Matumbela	0	1	1	0	0	0
1170	42	2004	4	20	2004-04-20	17	00:00:00	10:25:00		3500		1	9		1		2	M´bene	0	3	1	0	0	0
1176	42	2004	4	21	2004-04-21	17	00:00:00	10:03:00				26			1		2	Furvela	0	1	1	0	0	0
1179	42	2004	4	21	2004-04-21	17	00:00:00	11:55:00		4647		0	11		1		2	Matumbela	0	1	1	0	0	0						resistente
1061	38	2004	4	23	2004-04-23	17	00:00:00	10:01:00		3260		1	7		1	36.4	2	Xixe	0	3	1	0	0	0
1063	38	2004	4	23	2004-04-23	17	00:00:00	10:48:00		6248		4			1		2	Furvela	0	1	1	0	1	0
1064	38	2004	4	23	2004-04-23	17				5110		2	8		1		2	Matumbela	0	3	1	0	0	0
1066	38	2004	4	26	2004-04-26	18	00:00:00	08:28:00		6033		2	7		2	40	2	Furvela	0	5	1	0	0	0
1067	38	2004	4	26	2004-04-26	18	00:00:00	09:02:00		6250		18			1	35	2	Furvela	0	3	1	0	0	0
1070	38	2004	4	27	2004-04-27	18	00:00:00	08:33:00				2	3		1		2	Macaringa	0	5	1	0	0	0
1072	38	2004	4	29	2004-04-29	18	00:00:00	08:52:00		2891		67			1		2	jogo
1076	38	2004	4	29	2004-04-29	18	00:00:00	09:01:00		5209		21			1		2	Furvela	0	1	1	0	0	0
1079	38	2004	4	29	2004-04-29	18	1900-01-11	1900-01-11		6252		19			1	36.2	2	Jogo	1	0	0	0	0	0
1083	38	2004	4	30	2004-04-30	18	00:00:00	08:04:00		2268		2	8		1		2	Furvela
1081	38	2004	4	30	2004-04-30	18	00:00:00	08:08:00		6251		19			1		2	Furvela	0	3	1	0	0	0
1082	38	2004	4	30	2004-04-30	18	00:00:00	08:14:00				1			1		2	Jogo	0	3	1	0	0	0
1084	38	2004	4	30	2004-04-30	18	00:00:00	08:46:00				2	2		2	39.1	2	Furvela	0	4	1	0	0	0
1086	38	2004	4	30	2004-04-30	18	00:00:00	10:35:00		5021		2	2		2	38.8	2	Barane	0	4	1	0	0	0
1085	38	2004	4	30	2004-04-30	18	1900-01-10	1900-01-10		6237		29			2		2	Furvela	1	0	0	0	0	0
1297	47	2004	5	3	2004-05-03	19	00:00:00	09:06:00				0	6		1	39.6	2	Jogo												control
1300	47	2004	5	3	2004-05-03	19	00:00:00	09:25:00		6241		0	5		1	38.2	2	Matumbela	0	1	1	0	0	0
1302	47	2004	5	3	2004-05-03	19	00:00:00	10:05:00		6206		9			1	36.9	2	Furvela	0	3	1	0	0	0
1307	47	2004	5	4	2004-05-04	19	00:00:00	09:26:00				60			2		2	Jogo	1	0	0	0	0	0
1308	47	2004	5	5	2004-05-05	19	00:00:00	08:15:00		6233		50			2	38.2	2	Jogo	0	1	1	0	0	0
1313	47	2004	5	5	2004-05-05	19	00:00:00	09:16:00		4675		0	7		1	39.6	2	Furvela	0	5	1	0	0	0
1315	47	2004	5	5	2004-05-05	19	00:00:00	11:15:00				8			1	36.9	2	Beula		4	1	0	0	0	7	500
1314	47	2004	5	5	2004-05-05	19	1900-01-10	1900-01-10		4937		2	3		1	34.5	2	Jogo	0	4	1	0	0	0
1320	47	2004	5	6	2004-05-06	19	00:00:00	09:01:00				22			1		2	Furvela	1	0	0	0	0	0
1325	48	2004	5	10	2004-05-10	20	00:00:00	11:03:00		4579		1	1		1		2	Furvela	0	3	1	0	0	0
1330	48	2004	5	12	2004-05-12	20	00:00:00	11:04:00		1950		1	3		1	37	2	Matumbela
1331	48	2004	5	13	2004-05-13	20	00:00:00	08:25:00		4513		45			2		2	Furvela	0	1	1	0	0	0
1332	48	2004	5	13	2004-05-13	20	00:00:00	09:55:00		6219		0	8		1	37.5	2	Jogo	0	3	1	0	0	0
1333	48	2004	5	13	2004-05-13	20	00:00:00	11:02:00		3497		2	4		1		2	Jogo	0	1	1	0	0	0						resistente
1334	48	2004	5	13	2004-05-13	20	00:00:00	11:55:00		1855		0	7		2	37.7	2	Furvela	0	5	1	0	0	0
1338	48	2004	5	14	2004-05-14	20	00:00:00	10:15:00				3			1	37.8	2	Jogo	0	1	1	0	0	0
1339	48	2004	5	14	2004-05-14	20	00:00:00	10:35:00		1722		0	11		1	39.3	2	Furvela	0	1	1	0	0	0
1340	48	2004	5	14	2004-05-14	20	00:00:00	11:03:00		1641		20			2		2	Furvela	1	0	0	0	0	0
1341	48	2004	5	17	2004-05-17	21	00:00:00	08:02:00		6215		0	3		2	36.6	2	Furvela	1	0	0	0	0	0
1343	48	2004	5	17	2004-05-17	21	00:00:00	10:01:00				0	11		2	37.5	2	Furvela	0	3	1	0	0	0
1344	48	2004	5	17	2004-05-17	21	00:00:00	10:02:00		2975		1	11		2	38.3	2	Jogo	0	1	1	0	0	0
1346	48	2004	5	17	2004-05-17	21	00:00:00	11:04:00		6252		19			1		2	Matumbela									hospital
1352	48	2004	5	18	2004-05-18	21	00:00:00	10:02:00				2	3		1		2	Jogo	1	0	0	0	0	0
1355	48	2004	5	19	2004-05-19	21	00:00:00	08:03:00		680		54			2	36.6	2	Furvela	0	3	1	0	3	0
1271	46	2004	5	21	2004-05-21	21	00:00:00	08:45:00		6258		4	7		1	35.8	2	Jogo	1	0	0	0	0	0
1272	46	2004	5	21	2004-05-21	21	00:00:00	08:53:00		4695		0	7		2	35.6	2	Vala	1	0	0	0	0	0
1273	46	2004	5	21	2004-05-21	21	00:00:00	09:25:00		3505		1	6		2	38.5	2	Jogo	0	3	1	0	0	0
1274	46	2004	5	24	2004-05-24	22	00:00:00	08:02:00		6259		3	11		1	39.1	2	Furvela	0	4	1	0	0	0
1278	46	2004	5	24	2004-05-24	22	00:00:00	10:01:00				24			1		2	Furvela	0	1	1	0	0	0			hospital
1279	46	2004	5	24	2004-05-24	22	00:00:00	10:25:00		3143		55			1		2	Jogo	1	0	0	0	0	0
1283	46	2004	5	24	2004-05-24	22	00:00:00	11:05:00				22			1	35.6	2	Furvela	0	1	1	0	0	0
1286	46	2004	5	25	2004-05-25	22	00:00:00	09:54:00				1			2		2	Matumbela	0	4	1	0	0	0
1287	46	2004	5	25	2004-05-25	22	00:00:00	11:14:00		81		55			1		2	Singa	0	1	1	0	0	0
1288	46	2004	5	25	2004-05-25	22	00:00:00	11:16:00				3	11		1	36.2	2	M´bene	0	1	1	0	0	0
1284	46	2004	5	25	2004-05-25	22	1900-01-09	1900-01-09		4448		0	10		1		2	Jogo	0	3	1	0	0	0
1293	46	2004	5	27	2004-05-27	22	00:00:00	10:04:00		6258		4	7		1		2	Jogo	0	4	1	0	0	0
1294	46	2004	5	27	2004-05-27	22	00:00:00	10:44:00		119		56			2		2	Inharumbo	1	0	0	0	0	0
1250	45	2004	5	28	2004-05-28	22	00:00:00	08:43:00		4604		0	9		2	38.6	2	Matumbela	0	4	1	0	0	0
1251	45	2004	5	28	2004-05-28	22	00:00:00	08:55:00		6257		45			2		2	Furvela	0	4	1	0	0	0
1257	45	2004	5	28	2004-05-28	22	00:00:00	11:02:00		5110		2	9		1	36	2	Matumbela	0	3	1	0	0	0
1254	45	2004	5	28	2004-05-28	22	1900-01-10	1900-01-10		4109		1	5		1	39.7	2	Jogo	0	3	1	0	0	0
1259	45	2004	5	29	2004-05-29	22	00:00:00	13:15:00		6261		7			1	39.2	2	Beula	0	4	1	0	0	0
1260	45	2004	5	29	2004-05-29	22	1900-01-14	1900-01-14		6262		8			2	34.3	2	Furvela									hospital
1262	45	2004	5	31	2004-05-31	23	00:00:00	09:24:00		4875		1	4		1	37.1	2	Furvela	0	5	1	0	0	0
1263	45	2004	5	31	2004-05-31	23	00:00:00	10:03:00		4205		3	3		2	36.9	2	Furvela	0	1	1	0	0	0
1359	49	2004	6	1	2004-06-01	23	00:00:00	10:04:00				14			1		2	Furvela	0	1	1	0	0	0
1360	49	2004	6	1	2004-06-01	23	1900-01-11	1900-01-11				0	10		1	36.1	2	Furvela	0	4	1	0	0	0
1363	49	2004	6	2	2004-06-02	23	00:00:00	08:55:00				2	4		1	36	2	Jogo	0	5	1	0	0	0								TR
1366	49	2004	6	2	2004-06-02	23	00:00:00	09:36:00		6264		27			1		2	Inharime	0	1	1	0	0	0
1364	49	2004	6	2	2004-06-02	23	1900-01-09	1900-01-09				3	3		2	39.7	2		0	3	1	0	0	0
1373	49	2004	6	3	2004-06-03	23	00:00:00	10:03:00		6266		34			1		2	Furvela
1374	49	2004	6	3	2004-06-03	23	00:00:00	10:55:00		3132		2			1		2	Matumbela	0	3	1	0	0	0
1375	49	2004	6	3	2004-06-03	23	00:00:00	11:04:00		6267		4			2	32.4	2	Jogo	0	1	1	0	0	0
1377	49	2004	6	4	2004-06-04	23	00:00:00	08:05:00				1	6		1	36.8	2	Furvela	0	1	1	0	0	0
1378	49	2004	6	4	2004-06-04	23	00:00:00	09:05:00		6269		0	8		2	37.9	2	Inharrumbo
1379	49	2004	6	4	2004-06-04	23	00:00:00	11:01:00		294		4			1	38.6	2	Furvela	0	1	1	0	0	0
1382	49	2004	6	7	2004-06-07	24	1900-01-11	1900-01-11		3500		1	11			37.6	2	Furvela	0	3	1	0	0	0
1383	49	2004	6	8	2004-06-08	24	00:00:00	08:05:00	08:05:00	2008		34			1		2	Jogo									hospital					TR
1384	49	2004	6	8	2004-06-08	24	00:00:00	08:58:00		1402		10			2	37.4	2	Furvela	0	1	1	0	0	0
1386	49	2004	6	8	2004-06-08	24	00:00:00	09:04:00		6270		45			1	35.6	2	Jogo	0	1	1	0	0	0
1389	50	2004	6	8	2004-06-08	24	00:00:00	09:04:00							2		2	Furvela	0	1	1	0	0	0
1387	50	2004	6	8	2004-06-08	24	00:00:00	09:15:00				5			1		2	Furvela	1	0	0	0	0	0
1388	50	2004	6	8	2004-06-08	24	00:00:00	09:35:00		6271		0	4		2	37.9	2	Jogo	0	3	1	0	0	0
1391	50	2004	6	9	2004-06-09	24	00:00:00	08:03:00		6263		0	5		1	36.4	2	Gaza
1392	50	2004	6	9	2004-06-09	24	00:00:00	08:36:00		6272		25			1		2	Matumbela	1	0	0	0	0	0
1393	50	2004	6	9	2004-06-09	24	00:00:00	09:04:00		3888		1	5		1	39	2	Furvela	0	3	1	0	0	0
1397	50	2004	6	10	2004-06-10	24	00:00:00	08:01:00		6074		48			1		2	Furvela	1	0	0	0	0	0
1395	50	2004	6	10	2004-06-10	24	00:00:00	09:18:00		23203		2	4		2	38.5	2	Furvela	0	4	1	0	0	0			hospital
1396	50	2004	6	10	2004-06-10	24	00:00:00	10:01:00				1	6		1		2	Inharrumbo	0	3	1	0	0	0
1398	50	2004	6	11	2004-06-11	24	00:00:00	08:03:00				65			1		2	Jogo	0	1	1	0	0	0
1399	50	2004	6	11	2004-06-11	24	00:00:00	09:27:00				3			1	37.3	2	Jogo	0	3	1	0	0	0
1401	50	2004	6	11	2004-06-11	24	00:00:00	10:33:00		4715		0	11		1	35.8	2	Jogo									hospital
1407	50	2004	6	14	2004-06-14	25	00:00:00	08:16:00				4			1		2	Furvela	0	3	1	0	0	0
1406	50	2004	6	14	2004-06-14	25	00:00:00	11:38:00		3635		2	1		1	39	2	Furvela	0	3	1	0	0	0
1415	50	2004	6	16	2004-06-16	25	00:00:00	11:05:00		219		34			1	35.9	2	Furvela	0	1	1	0	0	0
1416	51	2004	6	17	2004-06-17	25	00:00:00	08:08:00		6274		48			1		2	Jogo	1	0	0	0	0	0
1417	51	2004	6	17	2004-06-17	25	00:00:00	08:41:00				22			2		2	Jogo
1419	51	2004	6	17	2004-06-17	25	1900-01-09	1900-01-09		6281		3			2	36.6	2	Jogo	0	3	1	0	0	0
1422	51	2004	6	18	2004-06-18	25	00:00:00	09:36:00		6075		0	8		2	36.8	2	Furvela	0	3	1	0	0	0
1425	51	2004	6	18	2004-06-18	25	1900-01-10	1900-01-10		6100		0	8		2	38.1	2	Jogo	1	0	0	0	0	0
1427	51	2004	6	21	2004-06-21	26	00:00:00	08:03:00		6282		8			2	36.4	2	Matumbela
1428	51	2004	6	21	2004-06-21	26	00:00:00	09:02:00		6283		1	5		1		2	Furvela	0	4	1	0	0	0
1430	51	2004	6	21	2004-06-21	26	00:00:00	09:55:00				2	5		2	36.9	2	Furvela	0	1	1	0	0	0
1431	51	2004	6	21	2004-06-21	26	00:00:00	11:05:00		6285		2	9		1	35.6	2	jogo	1	0	0	0	0	0						resistente
1436	51	2004	6	22	2004-06-22	26	1900-01-10	1900-01-10		6021		2	4		1		2	Matumbela	0	3	1	0	0	0
1435	51	2004	6	22	2004-06-22	26				6278		0	2		1	38.2	2	Jogo	0	4	1	0	0	0			hospital
1433	51	2004	6	22	2004-06-22	26				6287		28			1		2	Furvela
1440	51	2004	6	23	2004-06-23	26	00:00:00	11:35:00				55			2	35.6	2	Furvela	1	0	0	0	0	0
1441	51	2004	6	24	2004-06-24	26	00:00:00	09:01:00				3			1	36.6	2	Jogo	1	0	0	0	0	0
1442	51	2004	6	28	2004-06-28	27	00:00:00	08:05:00		2198		2			1	38.6	2	Furvela
1444	52	2004	6	28	2004-06-28	27	00:00:00	09:55:00		6291		2	9		2	36.8	2	Jogo	1	0	0	0	0	0
1446	52	2004	6	29	2004-06-29	27	00:00:00	08:01:00		3635		2	1		1	38	2	Furvela
1448	52	2004	6	29	2004-06-29	27	00:00:00	09:38:00		6276		1	7		2	36	2	M´bene	0	4	1	0	0	0
1451	52	2004	6	29	2004-06-29	27	00:00:00	10:55:00		6282		8			2	36.7	2	Jogo	1	0	0	0	0	0
1453	52	2004	6	30	2004-06-30	27	00:00:00	08:04:00		6204		1	3		2		2	Matumbela									hospital
1454	52	2004	6	30	2004-06-30	27	00:00:00	08:05:00		6295		1	8		1	37.1	2	Furvela	0	1	1	0	0	0
1456	52	2004	6	30	2004-06-30	27	00:00:00	09:09:00				9	6		1	35.6	2	Furvela	0	1	1	0	0	0
1459	52	2004	6	30	2004-06-30	27	00:00:00	10:05:00				1	6		1		2	Inharrumbo	1	0	0	0	0	0
1455	52	2004	6	30	2004-06-30	27	1900-01-09	1900-01-09				4	4		1	35.9	2	muengue	1	0	0	0	0	0
1461	53	2004	7	1	2004-07-01	27	00:00:00	09:02:00		6296		1			1	38.1	2	Jogo	0	1	1	0	0	0
1467	53	2004	7	2	2004-07-02	27	00:00:00	09:05:00		4516		1	1		1		2	Chidanga	0	1	1	0	0	0
1470	53	2004	7	3	2004-07-03	27	1900-01-17	1900-01-17				18			1		2	Uwa	0	1	1	0	0	0
1472	53	2004	7	5	2004-07-05	28	00:00:00	08:04:00		6299		55			1		2	Jogo	1	0	0	0	0	0
1473	53	2004	7	5	2004-07-05	28	00:00:00	08:05:00		1722		1	1		1	35.6	2	Furvela	0	4	1	0	0	0
1471	53	2004	7	5	2004-07-05	28	00:00:00	08:35:00				2	3		1		2	Beula	1	0	0	0	0	0
1476	53	2004	7	5	2004-07-05	28	00:00:00	09:03:00		6228		0	6		1		2	Gaza	0	3	1	0	0	0
1477	53	2004	7	5	2004-07-05	28	00:00:00	10:02:00		6275		2			2	39.1	2	Furvela	0	1	1	0	0	0
1478	53	2004	7	6	2004-07-06	28	00:00:00	08:35:00		5161		24			1		2	Furvela
1483	53	2004	7	6	2004-07-06	28	1900-01-10	1900-01-10							2		2		0	1	1	0	0	0
1484	53	2004	7	7	2004-07-07	28	00:00:00	09:01:00		6303		5			1		2	Nhabundo	0	1	1	0	0	0
1485	53	2004	7	8	2004-07-08	28	1900-01-11	1900-01-11		6304		7			1		2	Jogo
1486	53	2004	7	9	2004-07-09	28	1900-01-10	1900-01-10		1101		1			2	37.3	2	Furvela	0	4	1	0	0	0
1492	54	2004	7	13	2004-07-13	29	00:00:00	08:05:00		2718		2	1		1	37.6	2	Furvela	0	3	1	0	0	0
1493	54	2004	7	13	2004-07-13	29	00:00:00	08:58:00		6306		3	3		1	31	2	Matumbela	0	3	1	0	0	0
1495	54	2004	7	13	2004-07-13	29	00:00:00	11:03:00		6308		26			2		2	M´bene	0	1	1	0	0	0
1496	54	2004	7	14	2004-07-14	29	00:00:00	10:45:00		6298		23			1		2	Jogo	1	0	0	0	0	0
1501	54	2004	7	15	2004-07-15	29	00:00:00	10:38:00		6310		16			2	36.1	2	Furvela	1	0	0	0	0	0
1500	54	2004	7	15	2004-07-15	29	1900-01-10	1900-01-10		6309		18			1	37	2	Furvela	0	1	1	0	0	0
1503	54	2004	7	16	2004-07-16	29	1900-01-09	1900-01-09		4021		1	6		2	36.6	2	Chidanga	0	3	1	0	0	0
1506	54	2004	7	19	2004-07-19	30	00:00:00	08:05:00		9715		1			2		2	Furvela	0	5	1	0	0	0			hospital
1514	54	2004	7	19	2004-07-19	30	00:00:00	10:02:00		3888		1	6		1		2	Furvela	0	4	1	0	0	0
1516	55	2004	7	20	2004-07-20	30	00:00:00	08:04:00				1	1		1		2	Furvela	0	4	1	0	0	0
1518	55	2004	7	20	2004-07-20	30	00:00:00	10:02:00		6314		6			1		2	C. Maputo	0	3	1	0	0	0
1519	55	2004	7	20	2004-07-20	30	00:00:00	10:36:00		3333		2			1		2	Furvela	0	4	1	0	0	0
1520	55	2004	7	20	2004-07-20	30	00:00:00	11:25:00		6315		7			2		2	Jogo									hospital
1524	55	2004	7	21	2004-07-21	30						70			2		2	Jogo
1526	55	2004	7	22	2004-07-22	30	00:00:00	08:47:00				26			2		2	Jogo	0	1	1	0	0	0
1527	55	2004	7	22	2004-07-22	30	1900-01-11	1900-01-11				1	3		1	39	2	C. Maputo	0	3	1	0	0	0
1531	55	2004	7	23	2004-07-23	30	00:00:00	08:03:00		1855		0	10		1		2	Jogo	1	0	0	0	0	0
1536	55	2004	7	26	2004-07-26	31	00:00:00	11:02:00				17			1		2	Furvela	0	1	1	0	0	0
1535	55	2004	7	26	2004-07-26	31	00:00:00	11:08:00		6316		1	1		2	37.2	2		0	1	1	0	0	0
1532	55	2004	7	26	2004-07-26	31				4233		1	5		2		2	Jogo	0	4	1	0	0	0
1548	56	2004	7	29	2004-07-29	31	00:00:00	08:58:00		4021		1	4		2	36.9	2	Huwa									hospital
1549	56	2004	7	29	2004-07-29	31	00:00:00	09:05:00		6324		0	3		1		2	Matumbela	1	0	0	0	0	0
1550	56	2004	7	29	2004-07-29	31	00:00:00	10:02:00							2		2	Jogo	0	3	1	0	0	0						resistente
1553	56	2004	7	30	2004-07-30	31	00:00:00	10:45:00		3390		1	9		2		2	Furvela	0	1	1	0	0	0
1552	56	2004	7	30	2004-07-30	31				6280		2	2		1		2	Jogo	1	0	0	0	0	0
1555	57	2004	8	2	2004-08-02	32	00:00:00	08:04:00	08:04:00			16			1		2	Jogo									hospital					TR
1558	57	2004	8	3	2004-08-03	32	1900-01-09	1900-01-09		6326		18			2		2	Jogo	0	1	1	0	0	0
1560	57	2004	8	3	2004-08-03	32	1900-01-11	1900-01-11				3			2		2	Furvela	0	3	1	0	0	0
1561	57	2004	8	4	2004-08-04	32	00:00:00	08:25:00				7			2	36.6	2	Jogo	0	4	1	0	0	0
1571	57	2004	8	5	2004-08-05	32	00:00:00	11:05:00		6321		0	5		1	36	2	Gaza	1	0	0	0	0	0
1575	57	2004	8	6	2004-08-06	32	00:00:00	10:48:00				0	11		1		2	Furvela	0	3	1	0	0	0
1572	57	2004	8	6	2004-08-06	32				6276		1	8		2		2	Jogo	0	3	1	0	0	0
1573	57	2004	8	6	2004-08-06	32				9722		1	2		2		2	Jogo	0	4	1	0	0	0
1580	57	2004	8	9	2004-08-09	33	00:00:00	09:02:00		1962		1	5		1	38.4	2	Jogo	0	3	1	0	0	0
1582	58	2004	8	9	2004-08-09	33	00:00:00	11:11:00		310		4			2		2	Furvela	0	1	1	0	0	0
1581	57	2004	8	9	2004-08-09	33	1900-01-11	1900-01-11		6329		0	3		1		2	Jogo	0	4	1	0	0	0
1584	58	2004	8	10	2004-08-10	33	00:00:00	08:35:00				26			2		2	Jogo	0	3	1	0	0	0
1588	58	2004	8	10	2004-08-10	33	00:00:00	09:04:00		4700		1	1		1	36.9	2	Furvela	0	5	1	0	0	0
1587	58	2004	8	10	2004-08-10	33	00:00:00	09:35:00		6331		0	11		1	35.6	2	Jogo	0	3	1	0	0	0
1589	58	2004	8	11	2004-08-11	33	00:00:00	08:04:00		4375		1	6		1		2	Jogo	0	3	1	0	0	0
1594	58	2004	8	13	2004-08-13	33	1900-01-09	1900-01-09				60			2		2	Furvela	0	1	1	0	0	0
1604	58	2004	8	17	2004-08-17	34	00:00:00	11:03:00		1984		27			1		2	Jogo	0	1	1	0	0	0
1603	58	2004	8	17	2004-08-17	34	00:00:00	11:14:00				5	5		2	39.2	2	jogo	0	3	1	0	0	0
1605	58	2004	8	18	2004-08-18	34	00:00:00	08:04:00		6334		21			1		2	Furvela									hospital
1618	59	2004	8	20	2004-08-20	34	00:00:00	11:04:00		4244		3	6		1		2	Jogo
1617	59	2004	8	20	2004-08-20	34	00:00:00	11:22:00		1983		3			1	38.8	2	Furvela	0	4	1	0	0	0
1615	59	2004	8	20	2004-08-20	34	1900-01-10	1900-01-10				6			2		2	Jogo	0	3	1	0	0	0
1619	59	2004	8	23	2004-08-23	35	00:00:00	07:05:00		6336		0	10		1		2	C. Maputo	0	5	1	0	0	0
1622	59	2004	8	23	2004-08-23	35	00:00:00	08:42:00		6339		8			1	37	2	Jogo	0	1	1	0	0	0
1624	59	2004	8	23	2004-08-23	35	00:00:00	09:02:00		6263		0	8		1	36.2	2	Furvela	0	4	1	0	0	0
1625	59	2004	8	23	2004-08-23	35	00:00:00	09:03:00		437		80			2		2	Furvela	1	0	0	0	0	0
1626	59	2004	8	23	2004-08-23	35	00:00:00	10:56:00		170		4			2	39.6	2	Matumbela	0	1	1	0	0	0
1629	59	2004	8	24	2004-08-24	35	00:00:00	09:04:00		6131		0	7		1		2	Matumbela	0	3	1	0	0	0	587	38
1631	59	2004	8	24	2004-08-24	35	00:00:00	10:52:00		3132		2	3		1	36.8	2	Jogo	0	3	1	0	0	0
1630	59	2004	8	24	2004-08-24	35	1900-01-10	1900-01-10		6272		25			2		2	Furvela	0	1	1	0	0	0
1632	59	2004	8	25	2004-08-25	35	00:00:00	08:26:00		6341		8			1		2	Jogo	1	0	0	0	0	0
1633	59	2004	8	25	2004-08-25	35	00:00:00	08:56:00				2			2		2	Furvela	1	0	0	0	0	0
1635	59	2004	8	25	2004-08-25	35	1900-01-10	1900-01-10		6342		70			2		2	Furvela	0	1	1	0	0	0
1641	60	2004	8	26	2004-08-26	35	00:00:00	11:48:00				0	7		1		2	Furvela	0	1	1	0	0	0
1640	59	2004	8	26	2004-08-26	35	1900-01-11	1900-01-11		6345		0	6		1	37.7	2		0	4	1	0	0	0
1642	60	2004	8	27	2004-08-27	35	00:00:00	08:45:00		5110		3	1		2		2	Furvela	0	3	1	0	0	0
1653	60	2004	8	30	2004-08-30	36	00:00:00	10:03:00				4			1	36.9	2	Furvela	0	3	1	0	0	0
1654	60	2004	8	30	2004-08-30	36	00:00:00	10:34:00		51		3			1	36.1	2	Furvela	0	1	1	0	0	0
1656	60	2004	8	31	2004-08-31	36	00:00:00	09:09:00		6333		33			2		2	Furvela	0	1	1	0	0	0
1658	61	2004	9	1	2004-09-01	36	00:00:00	09:03:00		6351		0	5		1	37.8	2	Jogo	0	3	1	0	0	0
1659	61	2004	9	1	2004-09-01	36	00:00:00	10:14:00				4	5		1	38.8	2	Furvela	1	0	0	0	0	0
1662	61	2004	9	2	2004-09-02	36	00:00:00	09:55:00		6335		0	10		2	36.4	2	Furvela	0	3	1	0	0	0
1664	61	2004	9	2	2004-09-02	36	00:00:00	10:01:00		3649		2			2	36.6	2	Jogo	0	3	1	0	0	0
1665	61	2004	9	3	2004-09-03	36	1900-01-11	1900-01-11		4967		25			1		2	Furvela	0	1	1	0	0	0
1667	61	2004	9	6	2004-09-06	37	00:00:00	09:04:00		3132		2	3		1		2	Furvela
1668	61	2004	9	6	2004-09-06	37	00:00:00	09:44:00		1931		11			2		2	Furvela	0	3	1	0	0	0
1671	61	2004	9	6	2004-09-06	37	00:00:00	10:05:00		6353		27			1		2	Furvela	0	1	1	0	0	0
1670	61	2004	9	6	2004-09-06	37	00:00:00	10:44:00				65			2		2	Jogo									hospital
1674	61	2004	9	7	2004-09-07	37	00:00:00	09:27:00		6341		8			2		2		1	0	0	0	0	0
1675	61	2004	9	7	2004-09-07	37	00:00:00	11:04:00				0	11		2	38.6	2	Matumbela	0	4	1	0	0	0
1672	61	2004	9	7	2004-09-07	37	1900-01-09	1900-01-09		6260		2	6		1	38	2	C. Maputo	0	1	1	0	0	0
1676	61	2004	9	8	2004-09-08	37	00:00:00	08:03:00		6354		6			1		2	Furvela	0	1	1	0	0	0
1678	61	2004	9	8	2004-09-08	37	00:00:00	09:08:00		3659		2			1		2	Furvela	1	0	0	0	0	0
1679	61	2004	9	8	2004-09-08	37	00:00:00	09:12:00		6131		0	8		1		2	Furvela	1	0	0	0	0	0
1682	61	2004	9	8	2004-09-08	37	00:00:00	11:45:00		159		23			2		2	Furvela	0	1	1	0	0	0
1687	62	2004	9	10	2004-09-10	37	00:00:00	09:16:00		1858		1			2	37.5	2	Furvela	0	3	1	0	0	0
1688	62	2004	9	10	2004-09-10	37	00:00:00	09:25:00		6357		12			1		2	Furvela	1	0	0	0	0	0
1689	62	2004	9	10	2004-09-10	37	00:00:00	09:57:00		2198		2	11		1		2	Furvela	0	1	1	0	0	0
1691	62	2004	9	13	2004-09-13	38	00:00:00	08:03:00		3243		2	1		1	36	2	Jogo	0	3	1	0	0	0
1697	62	2004	9	13	2004-09-13	38	1900-01-12	1900-01-12		6360		0	9		1	38.4	2	Furvela	0	1	1	0	0	0
1701	62	2004	9	14	2004-09-14	38	00:00:00	09:05:00		4634		2	11		1	36.1	2	Furvela	0	1	1	0	0	0
1698	62	2004	9	14	2004-09-14	38	00:00:00	09:16:00		6331		1			1	38.2	2	Jogo	1	0	0	0	0	0
1707	62	2004	9	15	2004-09-15	38	00:00:00	10:04:00				5			1		2	Nhabanda		4	1	0	0	0	6	520
1710	63	2004	9	16	2004-09-16	38	00:00:00	08:45:00		1747		5			1	36.8	2	Furvela	0	1	1	0	0	0
1712	63	2004	9	16	2004-09-16	38	00:00:00	10:03:00		6364		0	4		2	36	2	Furvela												control
1713	63	2004	9	17	2004-09-17	38	00:00:00	08:55:00				1	9		2	36.9	2	Jogo	0	1	1	0	0	0
1714	63	2004	9	17	2004-09-17	38	1900-01-09	1900-01-09				0	10		2	39.5	2	Matumbela	0	4	1	0	0	0
1715	63	2004	9	20	2004-09-20	39	00:00:00	08:02:00		6365		2	10		2	38.9	2	Furvela	0	3	1	0	0	0
1717	63	2004	9	20	2004-09-20	39	00:00:00	10:05:00		714		4			2	37.3	2	Furvela	0	1	1	0	0	0
1716	63	2004	9	20	2004-09-20	39	1900-01-09	1900-01-09		6366		0	3		2	36.8	2	Furvela	1	0	0	0	0	0
1718	63	2004	9	21	2004-09-21	39	00:00:00	08:15:00				27			1		2	Furvela	0	1	1	0	0	0
1723	63	2004	9	21	2004-09-21	39	00:00:00	11:03:00		6368		20			1		2	Furvela
1726	63	2004	9	22	2004-09-22	39	00:00:00	08:36:00				5			1	36.6	2	Jogo	0	4	1	0	0	0
1731	63	2004	9	23	2004-09-23	39	00:00:00	08:29:00				3	7		2	37!	2	Furvela	0	3	1	0	0	0
1733	63	2004	9	23	2004-09-23	39	00:00:00	10:04:00		6373		0	3		1	38.4	2	Bovane	0	4	1	0	0	0
1734	63	2004	9	24	2004-09-24	39	00:00:00	08:29:00		6374		45			2		2	Jogo	1	0	0	0	0	0			hospital
1738	63	2004	9	24	2004-09-24	39	00:00:00	10:25:00				1	11		2		2	Matumbela
1741	64	2004	9	27	2004-09-27	40	00:00:00	09:04:00				60			2		2	Jogo
1743	64	2004	9	27	2004-09-27	40	00:00:00	10:05:00		6377		0	4		2	38.5	2	Furvela	1	0	0	0	0	0
1745	64	2004	9	27	2004-09-27	40	00:00:00	10:14:00				60			1	39.4	2	Furvela	1	0	0	0	0	0
1746	64	2004	9	27	2004-09-27	40	00:00:00	10:54:00		4675		0	11		2		2	Furvela	1	0	0	0	0	0
1742	64	2004	9	27	2004-09-27	40	1900-01-10	1900-01-10		6376		4			2	36.6	2	Chibuto	0	4	1	0	0	0
1749	64	2004	9	28	2004-09-28	40	00:00:00	08:05:00		448		4			2	35.4	2	Furvela	0	1	1	0	0	0
1747	64	2004	9	28	2004-09-28	40	00:00:00	08:35:00		3243		2	10		1		2	singa	0	1	1	0	0	0
1750	64	2004	9	28	2004-09-28	40	00:00:00	08:55:00		4328		2			1		2	Furvela	0	4	1	0	0	0
1753	64	2004	9	28	2004-09-28	40	00:00:00	11:36:00		1983		3			1		2	Furvela	0	3	1	0	0	0
1754	64	2004	9	29	2004-09-29	40	00:00:00	08:03:00		5324		26			1		2	Jogo	0	1	1	0	0	0
1757	64	2004	9	29	2004-09-29	40	00:00:00	09:58:00				2			1		2	Jogo	1	0	0	0	0	0
1760	64	2004	9	30	2004-09-30	40	00:00:00	07:05:00				1	3		1	37.4	2	Matumbela	0	3	1	0	0	0
1761	64	2004	9	30	2004-09-30	40	00:00:00	08:55:00		4878		29			1		2	Furvela	0	1	1	0	0	0
1762	64	2004	9	30	2004-09-30	40	00:00:00	09:01:00				24			1		2	Vala
1763	64	2004	9	30	2004-09-30	40	00:00:00	09:44:00		4021		0	1		1	36.4	2	Furvela	0	3	1	0	0	0
1767	65	2004	10	1	2004-10-01	40	00:00:00	09:03:00				1	5		2	37.8	2	Wengue	0	3	1	0	0	0
1769	65	2004	10	1	2004-10-01	40	00:00:00	10:03:00				6			1	36.6	2	Jogo	1	0	0	0	0	0
1771	65	2004	10	4	2004-10-04	41	00:00:00	08:02:00		2767		14			2	38.3	2	Furvela	0	1	1	0	0	0
1774	65	2004	10	4	2004-10-04	41	00:00:00	09:01:00		6382		60			1	36	2	Jogo	0	1	1	0	0	0
1773	65	2004	10	4	2004-10-04	41	00:00:00	09:08:00		6381		5			1		2	C. Maputo	0	3	1	0	0	0
1776	65	2004	10	4	2004-10-04	41	00:00:00	10:02:00		6263		0	9		1	37.4	2	Furvela	1	0	0	0	0	0
1780	65	2004	10	5	2004-10-05	41	00:00:00	08:42:00		1747		5			1		2	Furvela	1	0	0	0	0	0
1783	65	2004	10	6	2004-10-06	41	00:00:00	07:56:00		1434		45			2		2	Matumbela	1	0	0	0	0	0
1785	65	2004	10	6	2004-10-06	41	00:00:00	08:22:00				65			2		2	Panda	0	1	1	0	0	0
1789	65	2004	10	8	2004-10-08	41	1900-01-09	1900-01-09		4969		4	6		2	36.4	2	Furvela	1	0	0	0	0	0
1790	65	2004	10	8	2004-10-08	41	1900-01-09	1900-01-09		6386		0	4		1		2	Jogo									hospital
1955	72	2004	10	11	2004-10-11	42	00:00:00	08:35:00		6280					1		2	Jogo	1	0	0	0	0	0
1956	72	2004	10	11	2004-10-11	42	00:00:00	09:05:00		6387		0	6		1	39.3	2	Furvela	0	4	1	0	0	0
1960	72	2004	10	11	2004-10-11	42	00:00:00	10:58:00		6389		58			2		2	Inharumbo									hospital
1965	72	2004	10	12	2004-10-12	42	00:00:00	10:04:00		6381					1		2	Jogo	0	3	1	0	0	0	199	507
1966	72	2004	10	13	2004-10-13	42	00:00:00	08:04:00		6336		1			2	38	2	furvela	0	1	1	0	0	0
1967	72	2004	10	13	2004-10-13	42	00:00:00	08:55:00		2372		3	6		1		2	Jogo	1	0	0	0	0	0
1969	72	2004	10	13	2004-10-13	42	00:00:00	10:01:00		6393		60			1		2	Jogo	1	0	0	0	0	0
1970	72	2004	10	13	2004-10-13	42	00:00:00	10:02:00		6394		70			2		2	Jogo	1	0	0	0	0	0
1972	72	2004	10	13	2004-10-13	42	1900-01-11	1900-01-11		4488		1	4		2	37	2	Jogo	0	3	1	0	0	0
1791	66	2004	10	14	2004-10-14	42	00:00:00	07:05:00		4448		1	3		2	39	2	Furvela	0	5	1	0	0	0
1792	66	2004	10	14	2004-10-14	42	00:00:00	10:08:00		6214		31			2	35.8	2	Jogo
1793	66	2004	10	14	2004-10-14	42	00:00:00	10:45:00		3192		3			1	39	2	Furvela
1796	66	2004	10	14	2004-10-14	42	00:00:00	11:03:00		6396		4			1	35.6	2	Chocwe	1	0	0	0	0	0
1794	66	2004	10	14	2004-10-14	42	00:00:00	11:16:00		1920		1			2	36.7	2	Furvela	0	3	1	0	0	0
1795	66	2004	10	14	2004-10-14	42	00:00:00	11:25:00		6395		1	9		2	36.6	2	Jogo									hospital
1797	66	2004	10	14	2004-10-14	42	00:00:00	11:37:00		6397		25			1		2	Furvela	1	0	0	0	0	0
1800	66	2004	10	15	2004-10-15	42	00:00:00	11:03:00		6399		38			2		2	Jogo	0	1	1	0	0	0
1802	66	2004	10	18	2004-10-18	43	00:00:00	09:46:00		4562		1	7		1	39	2	Xixe	0	4	1	0	0	0
1803	66	2004	10	18	2004-10-18	43	00:00:00	10:46:00		5027		0	11		1	37.7	2	Furvela	0	3	1	0	0	0
1811	66	2004	10	19	2004-10-19	43	1900-01-10	1900-01-10		1722		1	4		2	39.2	2	Furvela	0	3	1	0	0	0
1816	66	2004	10	20	2004-10-20	43	00:00:00	09:04:00		1928		1	1		1	38.5	2	Jogo	0	1	1	0	0	0
1818	66	2004	10	21	2004-10-21	43	00:00:00	08:18:00				54			1		2	Jogo	0	3	1	0	0	0	204	519
1819	67	2004	10	21	2004-10-21	43	00:00:00	08:25:00		1740		55			1		2
1821	67	2004	10	21	2004-10-21	43	00:00:00	08:36:00		2718		3			1		2	Furvela	0	1	1	0	0	0
1825	67	2004	10	21	2004-10-21	43	00:00:00	09:06:00		2008		34			2		2	Vala	1	0	0	0	0	0
1831	67	2004	10	22	2004-10-22	43	00:00:00	11:04:00		6410		0	6		2		2	Vala	1	0	0	0	0	0
1835	67	2004	10	25	2004-10-25	44	00:00:00	09:38:00		6413		0	3		2	36	2	Furvela	0	4	1	0	0	0
1838	67	2004	10	28	2004-10-28	44	00:00:00	10:32:00		5534		69			2		2	Furvela	0	1	1	0	0	0
1839	67	2004	10	28	2004-10-28	44	00:00:00	11:18:00				1	9		1	35.6	2	Chocwe	0	3	1	0	0	0
1842	67	2004	10	29	2004-10-29	44	00:00:00	09:33:00		5520		29			1		2	Furvela	1	0	0	0	0	0
1844	67	2004	10	29	2004-10-29	44	00:00:00	10:56:00				2	9		1	38	2	Furvela	0	4	1	0	0	0
1848	68	2004	11	1	2004-11-01	45	00:00:00	08:05:00		6416		1	5		1	38.4	2	Matumbela	0	5	1	0	0	0
1851	68	2004	11	1	2004-11-01	45	00:00:00	10:03:00		4706		1	3		2	35.5	2	Furvela	0	3	1	0	0	0
1852	68	2004	11	1	2004-11-01	45	00:00:00	10:46:00				17			2		2	Jogo	0	1	1	0	0	0
1853	68	2004	11	1	2004-11-01	45	1900-01-11	1900-01-11				2	6		2		2	Furvela	0	3	1	0	0	0
1854	68	2004	11	2	2004-11-02	45	00:00:00	09:04:00		1882		1	3		1	39.2	2	Jogo
1860	68	2004	11	4	2004-11-04	45	00:00:00	10:05:00		6422		0	5		1	36.7	2	Jogo	0	3	1	0	0	0						control
1864	68	2004	11	5	2004-11-05	45	00:00:00	09:03:00		6425		2			2	40	2	Furvela
1866	68	2004	11	8	2004-11-08	46	00:00:00	09:55:00				2			2	38.2	2	Jogo
1869	68	2004	11	8	2004-11-08	46	00:00:00	10:05:00				7			2	36.4	2	Jogo														TR
1867	68	2004	11	8	2004-11-08	46	00:00:00	10:07:00		6034		1	3		2		2	Furvela
1872	68	2004	11	10	2004-11-10	46	00:00:00	07:07:00		6427		0	5		1		2	Furvela
[truncated: 3,838 more rows]

## Sheet: Sheet1
Time		Cases
[truncated: 304 more rows]

## Sheet: Sheet2
ISO week	Negative	falciparum pos	propn positive								<age group 1	2	3	all ages
[truncated: 156 more rows]

[truncated: 2 more sheets: Sheet3, Sheet4]
