# Supplementary material for: Some like it hot: a differential response to changing temperatures by the malaria vectors Anopheles funestus and An. gambiae s.l
Source: PeerJ. 2017 Mar 28;5:e3099. doi: 10.7717/peerj.3099 (PMC5372839; doi:10.7717/peerj.3099)
Supplement: File S7 [file peerj-05-3099-s007.xlsx]

## Sheet: Vilanculos
Year	Month	Day	Week	Mean Temp	Max temp	Min temp	SLP	H	PP	Rain days	VV	V	VM	Vg
2001	1	1	1	-	-	-	-	-	-		-	-	-	-	-	-	-
2001	1	2	1	-	-	-	-	-	-		-	-	-	-	-	-	-	-
2001	1	3	1	26.1	29.6	21.4	1013.4	65	0	0	29.9	18.5	29.4	-	o
2001	1	4	1	-	-	-	-	-	-		-	-	-	-	-	-	-	-
2001	1	5	1	-	-	-	-	-	-		-	-	-	-	-	-	-	-
2001	1	6	1	-	-	-	-	-	-		-	-	-	-	-	-	-	-
2001	1	7	1	-	-	-	-	-	-		-	-	-	-	-	-	-	-
2001	1	1 Average	1	26.1	29.6	21.4
2001	1	8	2	-	-	-	-	-	-		-	-	-	-	-	-	-	-
2001	1	9	2	-	-	-	-	-	-		-	-	-	-	-	-	-	-
2001	1	10	2	-	-	-	-	-	-		-	-	-	-	-	-	-	-
2001	1	11	2	-	-	-	-	-	-		-	-	-	-	-	-	-	-
2001	1	12	2	-	-	-	-	-	-		-	-	-	-	-	-	-	-
2001	1	13	2	-	-	-	-	-	-		-	-	-	-	-	-	-	-
2001	1	14	2	-	-	-	-	-	-		-	-	-	-	-	-	-	-
2001	1	2 Average	2	#DIV/0!	#DIV/0!	#DIV/0!
2001	1	15	3	-	-	-	-	-	-		-	-	-	-	-	-	-	-
2001	1	16	3	-	-	-	-	-	-		-	-	-	-	-	-	-	-
2001	1	17	3	-	-	-	-	-	-		-	-	-	-	-	-	-	-
2001	1	18	3	-	-	-	-	-	-		-	-	-	-	-	-	-	-
2001	1	19	3	-	-	-	-	-	-		-	-	-	-	-	-	-	-
2001	1	20	3	-	-	-	-	-	-		-	-	-	-	-	-	-	-
2001	1	21	3	-	-	-	-	-	-		-	-	-	-	-	-	-	-
2001	1	3 Average	3	#DIV/0!	#DIV/0!	#DIV/0!
2001	1	22	4	-	-	-	-	-	-		-	-	-	-	-	-	-	-
2001	1	23	4	-	-	-	-	-	-		-	-	-	-	-	-	-	-
2001	1	24	4	-	-	-	-	-	-		-	-	-	-	-	-	-	-
2001	1	25	4	-	-	-	-	-	-		-	-	-	-	-	-	-	-
2001	1	26	4	-	-	-	-	-	-		-	-	-	-	-	-	-	-
2001	1	27	4	-	-	-	-	-	-		-	-	-	-	-	-	-	-
2001	1	28	4	-	-	-	-	-	-		-	-	-	-	-	-	-	-
2001	1	4 Average	4	#DIV/0!	#DIV/0!	#DIV/0!
2001	1	29	5	-	-	-	-	-	-		-	-	-	-	-	-	-	-
2001	1	30	5	-	-	-	-	-	-		-	-	-	-	-	-	-	-
2001	1	31	5	-	-	-	-	-	-		-	-	-	-	-	-	-
2001	2	1	5	-	-	-	-	-	-		-	-	-	-	-	-	-
2001	2	2	5	-	-	-	-	-	-		-	-	-	-	-	-	-	-
2001	2	3	5	-	-	-	-	-	-		-	-	-	-	-	-	-	-
2001	2	4	5	-	-	-	-	-	-		-	-	-	-	-	-	-	-
2001	1.57143	5 Average	5	#DIV/0!	#DIV/0!	#DIV/0!
2001	2	5	6	26.4	27.3	25	1010.5	95	70.1	1	29	18.5	33.5	-	o		o
2001	2	6	6	29.4	30	27	-	81	0	0	16.7	12.4	18.3	-
2001	2	7	6	29.1	30.8	26	1010.9	76	0	0	27.5	24.6	57.6	-
2001	2	8	6	-	-	-	-	-	-		-	-	-	-	-	-	-	-
2001	2	9	6	28.7	29	24	-	75	0	0	20.6	15.2	16.5	-
2001	2	10	6	-	-	-	-	-	-		-	-	-	-	-	-	-	-
2001	2	11	6	-	-	-	-	-	-		-	-	-	-	-	-	-	-
2001	2	6 Average	6	28.4	29.275	25.5
2001	2	12	7	26.4	29.5	22	1012.3	90	89.92	1	18.8	14.1	20.6	-	o
2001	2	13	7	28.1	30	23.6	1010.8	80	4.06	1	21.7	10	18.3	-
2001	2	14	7	27.1	30	22.2	1009.4	-	0.51	1	24.9	14.3	18.3	25.2			o
2001	2	15	7	24.9	26.4	22.5	1012.5	93	120.9	1	15.3	8.9	18.3	21.7	o		o
2001	2	16	7	-	-	-	-	-	-		-	-	-	-	-	-	-	-
2001	2	17	7	-	-	-	-	-	-		-	-	-	-	-	-	-	-
2001	2	18	7	-	-	-	-	-	-		-	-	-	-	-	-	-	-
2001	2	7 Average	7	26.625	28.975	22.575
2001	2	19	8	29	30	28	-	82	0	0	11.3	18.1	22.2	-
2001	2	20	8	29.5	30.5	26	-	80	0	0	20.6	22.8	24.1	-
2001	2	21	8	-	-	-	-	-	-		-	-	-	-	-	-	-	-
2001	2	22	8	-	-	-	-	-	-		-	-	-	-	-	-	-	-
2001	2	23	8	-	-	-	-	-	-		-	-	-	-	-	-	-	-
2001	2	24	8	-	-	-	-	-	-		-	-	-	-	-	-	-	-
2001	2	25	8	29.7	31	24	1013.6	75	1.02	1	24.3	12.2	18.3	25.2	o
2001	2	8 Average	8	29.4	30.5	26
2001	2	26	9	30	31.5	23.5	1014.4	67	0	0	29.9	18.9	29.4	32.4
2001	2	27	9	-	-	-	-	-	-		-	-	-	-	-	-	-	-
2001	2	28	9	-	-	-	-	-	-		-	-	-
2001	3	1	9	-	-	-	-	-	-		-	-	-	-	-	-	-
2001	3	2	9	-	-	-	-	-	-		-	-	-	-	-	-	-	-
2001	3	3	9	-	-	-	-	-	-		-	-	-	-	-	-	-	-
2001	3	4	9	-	-	-	-	-	-		-	-	-	-	-	-	-	-
2001	2.57143	9 Average	9	30	31.5	23.5
2001	3	5	10	-	-	-	-	-	-		-	-	-	-	-	-	-	-
2001	3	6	10	28.5	31.6	27	-	85	0	0	24.1	5.2	7.6	-
2001	3	7	10	27.8	30.5	25.5	1010.8	87	5.08	1	18.7	8	14.8	18	o		o
2001	3	8	10	28.4	30.7	23.4	1009.2	81	12.95	1	28	5.6	9.4	18	o
2001	3	9	10	30.1	32	28	-	76	3.05	1	11.9	17.6	25.9	-	o		o
2001	3	10	10	-	-	-	-	-	-		-	-	-	-	-	-	-	-
2001	3	11	10	30.6	33	24.5	-	71	0	0	25.3	5.6	9.4	35.9
2001	3	10 Average	10	29.08	31.56	25.68
2001	3	12	11	29.7	31.5	24.5	-	81	0	0	22.5	14.3	18.3	39.6			o
2001	3	13	11	28.1	30	26	1014.7	80	7.11	1	24.9	9.8	20.6	39.6	o		o
2001	3	14	11	-	-	-	-	-	-		-	-	-	-	-	-	-	-
2001	3	15	11	25.1	26	24	-	89	0	0	16.7	8.1	22.2	-			o
2001	3	16	11	-	-	-	-	-	-		-	-	-	-	-	-	-	-
2001	3	17	11	-	-	-	-	-	-		-	-	-	-	-	-	-	-
2001	3	18	11	-	-	-	-	-	-		-	-	-	-	-	-	-	-
2001	3	11 Average	11	27.6333	29.1667	24.8333
2001	3	19	12	27.4	30	23.6	-	74	5.08	1	19.5	8.5	9.4	28.7	o
2001	3	20	12	-	-	-	-	-	-		-	-	-	-	-	-	-	-
2001	3	21	12	-	-	-	-	-	-		-	-	-	-	-	-	-	-
2001	3	22	12	-	-	-	-	-	-		-	-	-	-	-	-	-	-
2001	3	23	12	-	-	-	-	-	-		-	-	-	-	-	-	-	-
2001	3	24	12	-	-	-	-	-	-		-	-	-	-	-	-	-	-
2001	3	25	12	-	-	-	-	-	-		-	-	-	-	-	-	-	-
2001	3	12 Average	12	27.4	30	23.6
2001	3	26	13	-	-	-	-	-	-		-	-	-	-	-	-	-	-
2001	3	27	13	-	-	-	-	-	-		-	-	-	-	-	-	-	-
2001	3	28	13	-	-	-	-	-	-		-	-	-	-	-	-	-	-
2001	3	29	13	-	-	-	-	-	-		-	-	-	-	-	-	-	-
2001	3	30	13	-	-	-	-	-	-		-	-	-	-	-	-	-	-
2001	3	31	13	-	-	-	-	-
2001	4	1	13	28.8	31.5	27	1016	79	0	0	22.5	6.1	14.8	-
2001	3.14286	13 Average	13	28.8	31.5	27
2001	4	2	14	-	-	-	-	-	-		-	-	-	-	-	-	-	-
2001	4	3	14	-	-	-	-	-	-		-	-	-	-	-	-	-	-
2001	4	4	14	-	-	-	-	-	-		-	-	-	-	-	-	-	-
2001	4	5	14	25.8	29	23	-	86	0	0	13.5	24.4	33.5	-	o
2001	4	6	14	-	-	-	-	-	-		-	-	-	-	-	-	-	-
2001	4	7	14	22.8	27	19.5	-	85	1.02	1	18.2	8.9	9.4	-	o
2001	4	8	14	24.8	27.4	23	-	78	6.1	1	20.6	17	22.2	-
2001	4	14 Average	14	24.4667	27.8	21.8333
2001	4	9	15	23.8	28.8	19.5	-	83	0	0	21.6	8.3	13	-
2001	4	10	15	26.3	28.4	21	1014.1	72	5.08	1	19.2	8.5	11.1	-	o
2001	4	11	15	26.1	30	20.4	1016.1	74	0	0	23.5	8.1	11.1	39.6
2001	4	12	15	25.8	30	21.1	1016.6	79	0	0	27.2	4.8	13	35.9
2001	4	13	15	27.7	30.4	21.4	-	71	0	0	22.9	7	9.4	39.6
2001	4	14	15	26.3	30	22.5	-	80	0	0	18.2	9.6	20.6	-
2001	4	15	15	-	-	-	-	-	-		-	-	-	-	-	-	-	-
2001	4	15 Average	15	26	29.6	20.9833
2001	4	16	16	27.1	29	20.8	1019.6	72	4.06	1	21.1	16.1	18.3	-
2001	4	17	16	27.3	29.5	25	-	-	0	0	22.9	10.7	14.8	-
2001	4	18	16	27.2	29	25	1017.6	71	0	0	18.2	5.2	9.4	-
2001	4	19	16	27.3	30	25	-	72	0	0	14.2	8.7	14.8	-
2001	4	20	16	24.9	27	22	-	82	0	0	16.4	4.6	9.4	-
2001	4	21	16	27.8	29	26	-	61	0	0	15	18.5	24.1	-
2001	4	22	16	-	-	-	-	-	-		-	-	-	-	-	-	-	-
2001	4	16 Average	16	26.9333	28.9167	23.9667
2001	4	23	17	27.4	29.2	23	1014.2	69	0	0	19.2	9.8	14.8	-
2001	4	24	17	26.8	29	21.5	1015.1	75	0	0	27.5	5.6	14.8	35.9
2001	4	25	17	28.5	30	20.5	-	68	0	0	25.3	7.4	14.8	39.6
2001	4	26	17	-	-	-	-	-	-		-	-	-	-	-	-	-	-
2001	4	27	17	26.9	29	21.5	1016	71	0	0	22	9.3	18.3	39.6
2001	4	28	17	-	-	-	-	-	-		-	-	-	-	-	-	-	-
2001	4	29	17	28.3	31	21.4	1015.2	77	0	0	23.8	4.6	9.4	35.9
2001	4	17 Average	17	27.58	29.64	21.58
2001	4	30	18	27.9	29	23.6	-	69	0	0	22.5	21.1	24.1	28.7
2001	5	1	18	24.5	29	19	1020.1	74	0	0	16.1	8.1	29.4	35.9
2001	5	2	18	23.6	28	19.5	1018.4	76	2.03	1	20.8	15.7	29.4	35.9
2001	5	3	18	-	-	-	-	-	-		-	-	-	-	-	-	-	-
2001	5	4	18	-	-	-	-	-	-		-	-	-	-	-	-	-	-
2001	5	5	18	26.8	28.6	23	1011.8	69	0	0	20.6	13.3	29.4	-
2001	5	6	18	26.8	29.5	24.5	-	79	0	0	13.4	15.2	24.1	-
2001	4.85714	18 Average	18	25.92	28.82	21.92
2001	5	7	19	25.1	27.5	13.5	1017.3	60	0	0	22.9	5.4	9.4	32.4
2001	5	8	19	22.9	28	15.5	1019.7	73	0	0	22.9	2.4	9.4	35.9
2001	5	9	19	25.9	28	22.4	1019.8	68	0	0	21.9	8.9	14.8	35.9
2001	5	10	19	25.1	27.9	22	-	70	0	0	24.9	10.7	18.3	-
2001	5	11	19	21.2	28	17.7	1023.8	78	0	0	20	9.3	29.4	-
2001	5	12	19	23.6	26	18	1024.4	79	2.03	1	24	20	29.4	32.4	o
2001	5	13	19	-	-	-	-	-	-		-	-	-	-	-	-	-	-
2001	5	19 Average	19	23.9667	27.5667	18.1833
2001	5	14	20	22.2	26.6	15.4	1021.1	82	2.03	1	22	21.3	29.4	-	o
2001	5	15	20	23.3	26	19	1020	81	0.51	1	23.3	13.3	18.3	-	o
2001	5	16	20	24.6	26	23	-	76	0	0	17.9	16.1	18.3	-
2001	5	17	20	23.4	27.4	19	1022.2	80	0	0	24.9	8	18.3	-
2001	5	18	20	-	-	-	-	-	-		-	-	-	-	-	-	-	-
2001	5	19	20	-	-	-	-	-	-		-	-	-	-	-	-	-	-
2001	5	20	20	25.7	27.5	17.1	-	75	0	0	27	7.4	9.4	-
2001	5	20 Average	20	23.84	26.7	18.7
2001	5	21	21	24.7	28.2	18.5	1015.8	79	0	0	18.7	4.4	11.1	-
2001	5	22	21	23.7	29	18.5	1015.1	86	0	0	13.4	7	14.8	-				o
2001	5	23	21	24.3	28.4	19.5	1019.5	86	0	0	18.7	8	9.4	-				o
2001	5	24	21	24.4	27.4	19.8	1021.1	80	0	0	20	8.3	11.1	-				o
2001	5	25	21	23.9	26	19.5	1019.3	82	1.02	1	23	4.6	9.4	-	o
2001	5	26	21	24.4	28	19	1016.9	77	1.02	1	20.8	8.7	24.1	-	o
2001	5	27	21	22.5	28.4	17.4	1021.8	87	0	0	12.1	0	-	35.9				o
2001	5	21 Average	21	23.9857	27.9143	18.8857
2001	5	28	22	23.2	25.5	20	1026	87	1.02	1	17.2	15.6	24.1	28.7	o
2001	5	29	22	-	-	-	-	-	-		-	-	-	-	-	-	-	-
2001	5	30	22	23	26.5	15.5	1019.7	72	0	0	20.8	11.9	18.3	32.4
2001	5	31	22	23.8	27.2	16	1018.8	66	0	0	25.3	7.2	9.4	35.9
2001	6	1	22	23.3	27	17.5	-	73	0	0	17.5	-	-
2001	6	2	22	-	-	-	-	-	-		-	-	-	-	-	-	-	-
2001	6	3	22	-	-	-	-	-	-		-	-	-	-	-	-	-	-
2001	5.42857	22 Average	22	23.325	26.55	17.25
2001	6	4	23	24	26.8	16	1021.5	73	0	0	29.9	4.6	9.4	32.4
2001	6	5	23	24.5	27	17.5	1022.1	69	0	0	19.5	10	18.3	35.9
2001	6	6	23	-	-	-	-	-	-		-	-	-	-	-	-	-	-
2001	6	7	23	23.6	27	18.5	-	72	1.02	1	17.5	11.5	18.3	-	o
2001	6	8	23	23.3	26	17.2	1023.6	67	0	0	23	7.8	11.1	25.2
2001	6	9	23	-	-	-	-	-	-		-	-	-	-	-	-	-	-
2001	6	10	23	-	-	-	-	-	-		-	-	-	-	-	-	-	-
2001	6	23 Average	23	23.85	26.7	17.3
2001	6	11	24	21.4	25	18	1022.8	77	1.02	1	22.2	12	24.1	32.4
2001	6	12	24	20	24	16.2	1022.7	83	4.06	1	21.4	3.5	18.3	-	o
2001	6	13	24	20.8	23	18	1025.2	85	6.1	1	27	14.8	24.1	-	o
2001	6	14	24	22.2	26	16.4	1023.8	83	0	0	22.4	6.3	9.4	-	o
2001	6	15	24	21.5	26.2	14.5	1023.6	72	0	0	18.5	5.4	9.4	32.4
2001	6	16	24	-	-	-	-	-	-		-	-	-	-	-	-	-	-
2001	6	17	24	21.8	25.5	15	1019.8	73	0	0	24.9	4.6	9.4	-
2001	6	24 Average	24	21.2833	24.95	16.35
2001	6	18	25	23.2	26	16.5	1018.1	66	0	0	23.3	6.5	9.4	18
2001	6	19	25	21.9	26.2	14.5	1019.4	70	0	0	21.7	5.9	13	32.4
2001	6	20	25	21.7	25.6	16	1022.4	68	0	0	18.5	22.6	29.4	-
2001	6	21	25	19	26	13	1021.8	77	0	0	19	6.7	9.4	32.4
2001	6	22	25	-	-	-	-	-	-		-	-	-	-	-	-	-	-
2001	6	23	25	-	-	-	-	-	-		-	-	-	-	-	-	-	-
2001	6	24	25	20.7	21.1	19.5	-	92	7.11	1	9	11.1	18.3	-	o
2001	6	25	25	-	-	-	-	-	-		-	-	-	-	-	-	-	-
2001	6	25 Average	25	21.3	24.98	15.9
2001	6	26	26	-	-	-	-	-	-		-	-	-	-	-	-	-	-
2001	6	27	26	21.2	26	16	1022.2	84	0	0	27.5	7.8	18.3	35.9
2001	6	28	26	21.4	24.6	16.4	1021.2	75	0	0	19.8	6.5	9.4	-
2001	6	29	26	22.7	25.8	15	1019.6	78	0	0	24	3.7	9.4	35.9
2001	6	30	26	23.2	26.2	17.5	1019	78	0	0	24.9	13.7	22.2	32.4
2001	7	1	26	22.8	26.4	15	1023	83	0	0	26.2	3.7	9.4	32.4
2001	7	2	26	23.3	25.3	17.6	1025.6	84	0	0	27.5	13	22.2	-	o
2001	6.28571	26 Average	26	22.4333	25.7167	16.25
2001	7	3	27	22.6	26.6	19.4	1023.1	80	0	0	26.7	4.1	14.8	-
2001	7	4	27	23.4	26.5	19	1020.5	77	0	0	18	11.5	18.3	-
2001	7	5	27	24.4	26.6	16.5	1020.2	73	0	0	27.5	14.4	24.1	28.7
2001	7	6	27	24.1	27.5	20	1024.9	78	0	0	26.1	7	14.8	28.7
2001	7	7	27	23.1	24	16.1	-	79	0	0	20.1	28.2	37	-	o
2001	7	8	27	22.4	25.8	19	-	77	0	0	-	13.3	18.3	-
2001	7	9	27	23.1	26.3	18	1021.2	69	0	0	18.3	10	14.8	-
2001	7	27 Average	27	23.3	26.1857	18.2857
2001	7	10	28	23.2	27	14.9	1018.8	75	0	0	22	10	18.3	35.9
2001	7	11	28	22.7	26.6	14.5	1021.9	72	7.87	1	18.7	12.2	27.8	32.4	o
2001	7	12	28	22.2	25.4	15.5	1023.6	71	0	0	29.9	19.8	24.1	25.2
2001	7	13	28	21.4	24.2	16.2	1022.8	73	0	0	24.3	19.8	35.9	-
2001	7	14	28	22.8	25	15.5	1024.7	66	0	0	22.9	17	24.1	-
2001	7	15	28	21.2	24.2	15	1024.2	73	0	0	26.1	13.5	29.4	-
2001	7	16	28	19.4	24.6	12.4	1020.3	76	0	0	20.9	4.1	9.4	14.4
2001	7	28 Average	28	21.8429	25.2857	14.8571
2001	7	17	29	20.3	25	13	1017.9	76	0	0	21.4	5	9.4	28.7
2001	7	18	29	21.7	25.5	14.5	1014	82	0	0	22.2	15.2	27.8	32.4
2001	7	19	29	23.9	26	19	1009.4	80	0	0	20	17.6	29.4	-
2001	7	20	29	22.6	26.6	14.1	1012.9	84	0	0	9.8	9.6	16.5	32.4
2001	7	21	29	22.4	26	18	1014.8	87	0	0	14.6	5.4	9.4	32.4				o
2001	7	22	29	19.8	25	12.5	1019.4	59	0	0	20	19.1	29.4	-
2001	7	23	29	20.6	25.6	10.8	1018.8	68	0	0	21.9	6.7	14.8	35.9
2001	7	29 Average	29	21.6143	25.6714	14.5571
2001	7	24	30	18.8	20.5	11	1021.5	70	0	0	17.9	25.9	31.3	32.4
2001	7	25	30	19.7	23.2	12.5	1024.2	65	0	0	26.1	20.9	29.4	32.4
2001	7	26	30	17.8	20.5	14	1023.8	92	3.05	1	9.8	16.3	24.1	32.4	o
2001	7	27	30	19.2	23.6	14	1023.1	78	5.08	1	24.9	12.4	14.8	-
2001	7	28	30	21.6	24	15	-	79	0	0	24.9	10.2	20.6	35.9
2001	7	29	30	22.9	24.8	15	1026.7	80	2.03	1	22.5	16.1	18.3	25.2	o
2001	7	30	30	21.5	24.5	17.5	1028.2	86	3.05	1	20.3	18.7	25.9	28.7	o
2001	7	30 Average	30	20.2143	23.0143	14.1429
2001	7	31	31	22.6	24	17	1030.2	69	0	0	23	21.3	27.8	28.7
2001	8	1	31	22.4	23.5	16.1	1030.5	70	0	0	23.8	13	20.6	32.4
2001	8	2	31	22.3	25	17.5	1027	66	0	0	23.2	9.8	14.8	21.7
2001	8	3	31	21.1	23	17.5	-	75	0.76	1	20.3	6.1	14.8	21.7	o
2001	8	4	31	23.2	26	15	1022.2	72	0	0	23.8	5.2	9.4	35.9
2001	8	5	31	22.6	25	19.9	-	74	0	0	19.8	14.8	18.3	-
2001	8	6	31	22.3	25.6	15	1025.3	69	2.03	1	21.7	15.9	24.1	28.7	o
2001	7.85714	31 Average	31	22.3571	24.5857	16.8571
2001	8	7	32	21.2	24.5	15.6	1023.9	76	0.51	1	24	20.6	27.8	28.7
2001	8	8	32	22.1	25	15.4	1022.3	71	0	0	23.5	20.9	29.4	-
2001	8	9	32	20.3	25	15	1021.7	79	0	0	17.7	11.7	18.3	-
2001	8	10	32	21.1	25.5	14.5	1017.8	81	0	0	15	12.2	35.9	-				o
2001	8	11	32	22.6	25	17.5	-	81	0	0	20.3	14.4	20.6	-
2001	8	12	32	-	-	-	-	-	-		-	-	-	-	-	-	-	-
2001	8	13	32	21.2	25.3	14.6	1018.4	75	0	0	21.9	14.6	35.9	-
2001	8	32 Average	32	21.4167	25.05	15.4333
2001	8	14	33	22.6	25.6	16.5	1017.7	73	0	0	16.6	17.6	27.8	35.9
2001	8	15	33	24.2	25	18.3	1017.4	77	0	0	14.5	19.3	25.9	32.4
2001	8	16	33	22.8	25	14.8	-	85	0	0	14.6	13.5	20.6	32.4				o
2001	8	17	33	22.2	26.4	14.6	1017.4	80	0	0	20.4	9.8	18	28.7				o
2001	8	18	33	25.1	26.5	20.4	1016.4	76	0	0	24	20.7	29.4	35.9
2001	8	19	33	24	27.4	15.5	1019.3	81	0	0	23.5	8.7	14.8	35.9
2001	8	20	33	25.3	27.2	21	1018.5	81	0	0	18.3	13.9	24.1	28.7
2001	8	33 Average	33	23.7429	26.1571	17.3
2001	8	21	34	25.6	27.2	21.6	1017.8	78	0	0	21.1	19.6	31.3	35.9
2001	8	22	34	25.3	27	22.5	1015	80	0	0	24.3	22.8	29.4	35.9
2001	8	23	34	25.6	27	16.1	1018	79	0	0	21.9	11.1	20.6	32.4
2001	8	24	34	25.3	26.5	22.5	1016.5	76	0	0	25.3	24.4	29.4	35.9
2001	8	25	34	25.9	27.5	22.5	1016.4	77	0	0	21.1	20.9	25.9	35.9
2001	8	26	34	25	27.5	22.5	1017.7	82	0	0	27	11.5	24.1	32.4
2001	8	27	34	25.3	27.8	23.8	1020.1	81	0	0	17.5	14.4	18.3	28.7
2001	8	34 Average	34	25.4286	27.2143	21.6429
2001	8	28	35	25.3	27	22.5	1021.5	77	0	0	26.2	8.5	9.4	35.9
2001	8	29	35	25.4	27	21.9	1019.4	78	0	0	19.5	22.2	28.7	35.9
2001	8	30	35	25.9	27	22.5	1019.2	76	0	0	26.2	24.1	25.9	35.9
2001	8	31	35	25.7	27.5	22	1018	79	0	0	21.6	25.7	50.4	-
2001	9	1	35	25.6	27.7	23.1	1015.9	77	0	0	20.3	21.7	25.9	35.9
2001	9	2	35	24.1	27.8	20.5	1018.1	82	0	0	22.9	11.5	18.3	-
2001	9	3	35	25.1	28	20.6	1016.1	77	0	0	21.6	14.3	22.2	28.7
2001	8.42857	35 Average	35	25.3	27.4286	21.8714
2001	9	4	36	25.2	27	21	1014.2	80	0	0	22.4	17.8	22.2	32.4
2001	9	5	36	25.5	27.5	23.2	1014.3	82	0	0	24.3	22	27.8	-
2001	9	6	36	25.9	28	23	1009.4	78	0	0	21.2	24.4	29.4	32.4
2001	9	7	36	24	26.5	17.6	1019	65	0	0	23.5	27.4	37	-
2001	9	8	36	22.2	25.6	15	1020.7	71	0	0	24.3	9.6	14.8	28.7
2001	9	9	36	24.2	26.5	20	1018.5	66	0	0	22.9	9.1	14.8	-
2001	9	10	36	-	-	-	-	-	-		-	-	-	-	-	-	-	-
2001	9	36 Average	36	24.5	26.85	19.9667
2001	9	11	37	26.9	28.6	25.6	-	74	0	0	24.9	19.4	24.1	-
2001	9	12	37	26.1	28.3	22.5	1014.1	81	0	0	19.3	19.8	24.1	35.9
2001	9	13	37	26.3	28	22.6	1013.3	78	0	0	21.2	11.7	14.8	32.4
2001	9	14	37	21	23.3	19	1021.9	91	3.05	1	8.7	32.8	72	-	o
2001	9	15	37	20.5	23	17.7	1026.1	74	0	0	28	23.3	33.5	-
2001	9	16	37	21	24.5	15.6	1022.6	74	0.76	1	21.7	20.4	25.9	-	o
2001	9	17	37	22.6	26	14.5	1018.6	69	0	0	19.5	10.7	14.8	-
2001	9	37 Average	37	23.4857	25.9571	19.6429
2001	9	18	38	23.3	26.5	16	1018.5	67	0	0	21.6	12	20.6	35.9
2001	9	19	38	24.6	27	22	1018.3	67	0	0	22.9	13.3	14.8	39.6
2001	9	20	38	25	27.3	20.5	1019.1	62	0	0	20	17	25.9	32.4
2001	9	21	38	24.4	26	19.5	1018.1	64	0	0	21.7	13.5	22.2	35.9
2001	9	22	38	24.4	27	21.8	1016.1	63	0	0	19.5	18.9	28.7	-
2001	9	23	38	24.5	27	21.5	1015.4	66	0	0	26.7	8.7	14.8	35.9
2001	9	24	38	25.3	27	22.3	1013.5	79	0	0	20.4	14.6	22.2	28.7
2001	9	38 Average	38	24.5	26.8286	20.5143
2001	9	25	39	26.4	27	22.5	1013	79	0	0	26.2	24.4	29.4	-
2001	9	26	39	26	29	22	1015.1	80	0	0	18.7	15.4	20.6	25.2
2001	9	27	39	26.4	28.6	23.5	1014.6	84	0	0	25.3	15.7	29.4	32.4
2001	9	28	39	24.9	27.5	20.9	-	64	0	0	16.9	28	33.5	48.2
2001	9	29	39	23.3	27	16.5	1022.4	67	0	0	22.7	15.2	24.1	25.2
2001	9	30	39	24.1	27	16.3	1022.3	61	0	0	21.7	17.2	25.9	32.4
2001	10	1	39	23.3	27	15	1019.2	65	0	0	24	8.7	18	39.6
2001	9.14286	39 Average	39	24.9143	27.5857	19.5286
2001	10	2	40	24.3	28	16.2	1021.3	59	0	0	21.6	18.5	31.3	39.6
2001	10	3	40	25.7	27.2	16.6	1022.1	62	0	0	24	20.2	24.1	39.6
2001	10	4	40	25.3	27	19	1021.1	68	0	0	22.4	11.3	18.3	32.4
2001	10	5	40	26.8	30.8	23	1017.4	72	0	0	22.5	15.6	28.7	39.6
2001	10	6	40	26.6	28.5	22	1015.8	75	0	0	24	14.3	20.6	32.4
2001	10	7	40	25.5	28	21.5	1018.7	82	0	0	28.8	8.3	14.8	32.4
2001	10	8	40	25.9	28.6	19.5	1021.7	73	0	0	26.1	18.5	29.4	35.9
2001	10	40 Average	40	25.7286	28.3	19.6857
2001	10	9	41	25.9	29	19.5	1021.4	66	0	0	24	19.4	29.4	35.9
2001	10	10	41	24.9	27	18	1018.3	71	2.03	1	22.4	15.9	22.2	25.2
2001	10	11	41	24.6	29	18.4	1018.2	71	0	0	21.4	8	14.8	35.9
2001	10	12	41	26.3	28	19.2	1016.6	70	0	0	20	11.5	18.3	35.9
2001	10	13	41	27.5	28.2	20.4	1019	68	0	0	29.9	12	14.8	39.6
2001	10	14	41	24.2	26	20.8	1020.6	69	6.1	1	21.1	22.4	27.8	39.6
2001	10	15	41	25.3	27	20.5	1018.3	62	0	0	21.7	15	16.5	25.2
2001	10	41 Average	41	25.5286	27.7429	19.5429
2001	10	16	42	26.5	28	22.5	1016	67	0	0	19.8	20.4	24.1	35.9
2001	10	17	42	26.4	28.2	22.5	1014.7	66	0	0	24.6	13.5	14.8	39.6
2001	10	18	42	28.2	34	22.8	1010.4	64	0	0	22.5	21.9	25.9	44.3
2001	10	19	42	26.8	29.4	25	1014	81	0	0	25.1	17	33.5	39.6
2001	10	20	42	27.9	29.5	25	1018.8	80	0	0	21.2	13.5	25.9	-
2001	10	21	42	27.9	29.2	24	1018.5	73	0	0	23.8	15.2	24.1	25.2
2001	10	22	42	27.8	29	24.5	1014.8	70	0	0	19.8	15.4	18.3	32.4
2001	10	42 Average	42	27.3571	29.6143	23.7571
2001	10	23	43	27.1	29.6	22.5	1014	76	0	0	18.3	9.6	14.8	32.4
2001	10	24	43	27.8	29.5	24.5	1013.5	72	0	0	25.7	14.1	18.3	39.6
2001	10	25	43	27.6	30	25	1014.3	75	0	0	27.5	14.4	24.1	39.6
2001	10	26	43	25.8	28.5	20	1014.3	67	0	0	24.1	16.9	29.4	35.9
2001	10	27	43	26.2	29	20.5	1015.6	74	0	0	29.9	11.5	18.3	39.6
2001	10	28	43	26.6	29	20.5	-	60	0	0	20.6	-	-	-
2001	10	29	43	25.8	28.5	22	1015.5	61	0	0	25.9	15.4	25.9	39.6
2001	10	43 Average	43	26.7	29.1571	22.1429
2001	10	30	44	26.5	28	22.6	1013.8	62	0	0	21.1	16.9	22.2	39.6
2001	10	31	44	26.9	28.5	20	1014.1	66	0	0	23.8	13.5	18.3	32.4
2001	11	1	44	27.4	29.1	23.5	1016	69	0	0	22	13.9	27.8	39.6
2001	11	2	44	27.1	29.5	20.4	1016.2	71	0	0	29.9	13.3	18.3	32.4
2001	11	3	44	25.1	29	19.8	1014.6	77	0	0	25.9	9.4	20.6	39.6
2001	11	4	44	28.3	30.2	24.5	1012.4	73	0	0	24.5	20	29.4	43.2
2001	11	5	44	28.6	31	25.9	1013.2	80	0	0	24	22.8	27.8	39.6
2001	10.7143	44 Average	44	27.1286	29.3286	22.3857
2001	11	6	45	28.7	30.6	26	1015.6	74	0	0	19.2	16.3	21.7	-
2001	11	7	45	28.8	31.1	25	1014.8	73	0	0	23.2	18.1	24.1	35.9
2001	11	8	45	29.5	30.5	22.4	1016.8	65	0	0	23.8	18.3	18.3	43.2
2001	11	9	45	27.3	30.5	25	1018.1	74	0	0	21.7	28	29.4	39.6
2001	11	10	45	27.3	30.2	25	1018.6	76	0	0	23.8	16.9	18.3	28.7
2001	11	11	45	27.7	29.6	25	1015.5	72	0	0	29.9	12	14.8	-
2001	11	12	45	25.7	29.6	25	1013.7	80	1.02	1	24.1	11.5	22.2	35.9	o		o
2001	11	45 Average	45	27.8571	30.3	24.7714
2001	11	13	46	25.2	27	23	1013.3	83	0	0	21.7	7	11.1	-	o
2001	11	14	46	26.3	28	22.3	-	76	0	0	18.2	8.3	18.3	-
2001	11	15	46	28.6	29.5	25.5	1014.1	77	0.51	1	21.1	16.9	20.6	25.2
2001	11	16	46	25.9	26.6	24.1	1015.1	88	3.05	1	13.8	10.2	14.8	-	o		o
2001	11	17	46	24.8	27	22.4	1014.7	88	58.93	1	9.8	6.3	14.8	-	o
2001	11	18	46	25	26.4	23	1014.1	94	26.92	1	22.7	9.6	14.8	-	o
2001	11	19	46	26.7	28	25	1012.6	86	0	0	19.8	15.6	20.6	-			o
2001	11	46 Average	46	26.0714	27.5	23.6143
2001	11	20	47	28.6	30.6	26	1012.5	81	0	0	22.9	17	18.3	-
2001	11	21	47	27.5	28.5	25.5	1013.6	89	0	0	19	8.7	11.1	18	o
2001	11	22	47	28.4	29.5	25.5	-	79	0	0	19	-	-	-	o		o
2001	11	23	47	28.4	30.8	24.5	1015.1	81	1.02	1	22	10.7	14.8	-
2001	11	24	47	28.6	31	26	1015	79	0	0	27	12.2	18.3	21.7
2001	11	25	47	29.7	31	17.4	1015.6	71	0	0	23.8	17	22.2	35.9
2001	11	26	47	29.2	31.2	25.6	1011.9	74	0	0	24.6	16.3	18.3	43.2
2001	11	47 Average	47	28.6286	30.3714	24.3571
2001	11	27	48	29.6	32	26.5	1012.6	76	0	0	19.5	20.9	27.8	43.2
2001	11	28	48	26.1	30.4	24.2	1016.8	88	12.95	1	25.9	21.9	46.9	-	o
2001	11	29	48	26.1	29.4	23.5	1013.6	83	0	0	26.7	11.1	14.8	-
2001	11	30	48	29	31	24.5	1010.6	71	0	0	24	16.9	22.2	-
2001	12	1	48	29	30	26.1	1010.7	76	0.51	1	26.2	21.5	43.2	-
2001	12	2	48	29.1	31.6	26	1008	78	0	0	29.9	21.3	24.1	-
2001	12	3	48	-	-	-	-	-	-		-	-	-	-	-	-	-	-
2001	11.4286	48 Average	48	28.15	30.7333	25.1333
2001	12	4	49	27.2	30.2	21	1014.4	68	0	0	21.7	16.9	18.3	-
2001	12	5	49	26.6	29.5	21.4	1013.3	75	0	0	23.2	10.6	18	28.7
2001	12	6	49	29.3	31.2	25.8	1012	78	0	0	22.2	12	28.7	35.9			o
2001	12	7	49	27.2	30	25.3	1012.3	84	2.03	1	17.4	9.4	25.9	39.6	o
2001	12	8	49	26.6	29.5	24	1013.1	83	5.08	1	27.4	8.1	14.8	-	o
2001	12	9	49	28.4	30	25.3	1014.5	68	0	0	19.2	14.4	18.3	-
2001	12	10	49	28.4	31	25.4	1012.9	75	0	0	26.4	9.8	14.8	32.4
2001	12	49 Average	49	27.6714	30.2	24.0286
2001	12	11	50	29.8	31.5	26	1010.5	75	0	0	23.5	23.7	29.4	43.2
2001	12	12	50	29.8	32.5	27	1011.5	77	0	0	26.7	10.7	18.3	32.4
2001	12	13	50	25.7	27.5	24	1013.7	87	25.91	1	19	9.6	18.3	28.7	o		o
2001	12	14	50	28.6	31	23.5	1012.9	79	0.51	1	20.9	13	16.5	-
2001	12	15	50	28.3	31	25	1011.4	81	9.91	1	20.3	10.6	24.1	-	o
2001	12	16	50	27.9	31	23	1010	77	14.99	1	22.7	9.3	14.4	-
2001	12	17	50	29.6	31.1	23.8	1011.1	72	0	0	24.6	13.1	25.9	39.6
2001	12	50 Average	50	28.5286	30.8	24.6143
2001	12	18	51	28.4	31.5	23.5	1012.7	76	0	0	27.5	11.7	14.8	61.1
2001	12	19	51	29.7	31	24	1010.8	68	0	0	20.6	12	22.2	39.6
2001	12	20	51	28.3	30	26	-	79	10.92	1	18.5	15.6	27.8	-			o
2001	12	21	51	27.7	30.8	24.6	1012.3	69	0	0	25.9	18.7	22.2	-
2001	12	22	51	27.8	30.2	23.4	1013.9	70	0	0	25.1	8.3	11.1	35.9
2001	12	23	51	28.6	30.6	26	1013.8	65	0	0	22.5	19.8	50.4	-
2001	12	24	51	29.4	31.5	26	1012.4	74	0	0	24.5	17.4	18.3	39.6
2001	12	51 Average	51	28.5571	30.8	24.7857
2001	12	25	52	29.6	32.3	17	1009.2	68	0	0	29.9	22.8	28.7	43.2
2001	12	26	52	26.4	30.6	22.2	1008.3	83	7.87	1	21.1	25.9	50.4	-	o
2001	12	27	52	28.2	31	23.4	1011.5	73	0	0	22	11.5	18.3	-
2001	12	28	52	-	-	-	-	-	-		-	-	-	-	-	-	-	-
2001	12	29	52	25.2	26.5	23.2	1012	93	7.11	1	12.1	18.9	24.1	-	o
2001	12	30	52	25.6	27.5	23.5	1011.1	91	28.96	1	15.9	18.1	31.3	-	o
2001	12	31	52	25.2	29	23.2	1010.2	86	62.99	1	12.2	17.2	25.9	-	o
2001	12	52 Average	52	26.7	29.4833	22.0833
2002	1	1	1	27.8	30.6	23	1009.2	83	7.11	1	23.2	15.7	28.7	-
2002	1	2	1	28.8	31.5	23	1012.4	74	3.05	1	26.2	16.9	25.9	-
2002	1	3	1	28.4	31.5	21	1015.9	72	0	0	23.5	23.2	29.4	43.2
2002	1	4	1	27.8	31.2	22.4	1015.8	68	0	0	22.9	25	50.4	-
2002	1	5	1	28.2	30.6	22	1014.7	68	0	0	20.9	13.9	24.1	43.2
2002	1	6	1	28.5	30.5	23.8	1012.4	65	0	0	23.8	9.3	14.8	35.9
2002	1	7	1	29.1	31	22.5	1011.5	71	0	0	20.1	20.7	29.4	43.2
2002	1	1 Average	1	28.3714	30.9857	22.5286
2002	1	8	2	29.4	31.5	25	1014.6	70	0	0	22.2	21.3	43.2	64.8
2002	1	9	2	29.1	31.4	25.5	1016.2	63	0	0	22	17	24.1	39.6
2002	1	10	2	27.1	30	21.5	1014.5	70	0	0	22.2	13.9	21.7	43.2
2002	1	11	2	29.6	31.2	25.4	1013.1	70	0	0	23	13.5	18	43.2
2002	1	12	2	29	31	24.5	-	72	0	0	20.6	-	-	-
2002	1	13	2	30	32.5	21	1010.6	77	0	0	25.1	19.1	24.1	43.2
2002	1	14	2	29.7	32.5	26.5	1011.1	72	0.25	1	21.7	6.1	18.3	-
2002	1	2 Average	2	29.1286	31.4429	24.2
2002	1	15	3	27.7	31.6	24	1011.1	82	0	0	22.5	6.3	9.4	21.7
2002	1	16	3	28.9	31.4	24	1011	75	0	0	24.1	9.6	25.2	-
2002	1	17	3	29.3	32	26.8	1010.2	71	0	0	23.8	12.6	14.8	39.6
2002	1	18	3	29.6	31.5	25.5	1008.4	67	0	0	23.8	11.3	16.5	-
2002	1	19	3	30	32	24.2	1011.8	69	0	0	23	15.2	25.9	43.2
2002	1	20	3	30.1	32.5	22.5	1013.2	63	0	0	22.5	17.6	24.1	39.6
2002	1	21	3	29.2	32.5	22.8	1012.5	72	0	0	21.7	19.3	77.8	-
2002	1	3 Average	3	29.2571	31.9286	24.2571
2002	1	22	4	29.7	32.6	23.5	1011.2	65	0	0	22	16.3	27.8	43.2
2002	1	23	4	28.8	32	22.1	1009.9	68	0	0	22.7	13.1	29.4	39.6
2002	1	24	4	30.6	32.5	22.7	1011.3	63	0	0	22	16.5	22.2	43.2
2002	1	25	4	29.5	32.5	23	1013.4	64	0	0	26.2	20.6	25.9	43.2
2002	1	26	4	30.5	32	22	1014.4	64	0	0	23.8	13.9	22.2	35.9
2002	1	27	4	27.3	31.1	22.5	1014.9	74	1.02	1	23.2	14.1	20.6	39.6
2002	1	28	4	29.4	31.4	21.5	1013.6	63	0	0	26.2	7	9.4	39.6
2002	1	4 Average	4	29.4	32.0143	22.4714
2002	1	29	5	29.7	31.5	26	1012.8	66	0	0	23.2	11.1	28.7	39.6
2002	1	30	5	28.6	31.5	24.4	1011.4	75	0	0	25.9	7.4	14.8	39.6
2002	1	31	5	28.9	32.3	23.6	1011.1	70	0	0	25.9	7.8	16.5	28.7
2002	2	1	5	30.5	32	25.5	-	69	0	0	22.5	9.6	14.8	35.9
2002	2	2	5	27.8	32	22	1014.6	77	0	0	25.3	19.4	25.9	43.2
2002	2	3	5	28.3	31.5	23.5	1012.5	71	0	0	28.8	22.2	25.9	35.9
2002	2	4	5	30.5	32.6	22	1009.5	59	0	0	20.6	13.9	22.2	35.9
2002	1.57143	5 Average	5	29.1857	31.9143	23.8571
2002	2	5	6	29.8	32.4	22.7	1010.1	68	0	0	24	14.1	24.1	43.2
2002	2	6	6	30	32	22.1	1009.2	73	0	0	23.8	7.8	14.8	43.2
2002	2	7	6	30.6	33	24.5	-	70	0	0	22	13.5	28.7	43.2
2002	2	8	6	27.8	33	24	-	77	0	0	17.9	20.7	32.4	39.6
2002	2	9	6	27.4	30.8	21.5	1013.2	65	4.06	1	28	20.4	24.1	-
2002	2	10	6	28.2	31	19.5	-	53	0	0	20.9	17.8	22.2	39.6
2002	2	11	6	30.4	32.5	28	1006.5	61	0	0	20	13	22.2	-
2002	2	6 Average	6	29.1714	32.1	23.1857
2002	2	12	7	30.1	32.5	26.5	1010.3	70	0	0	23.2	10.6	14.8	39.6
2002	2	13	7	29.6	31.3	24	1011.1	67	0	0	24.6	9.8	14.8	39.6
2002	2	14	7	30.5	31.6	23.6	1010.5	66	0	0	26.2	11.1	14.8	43.2
2002	2	15	7	29.9	32.5	23.9	1010.6	69	0	0	22	11.7	18.3	43.2
2002	2	16	7	29.3	32.3	23.6	1011.1	75	0	0	23.2	6.1	14.8	39.6
2002	2	17	7	-	-	-	-	-	-		-	-	-	-
2002	2	18	7	28.2	30.5	22.1	1017.5	59	4.06	1	19.3	20.2	25.9	40.7
2002	2	7 Average	7	29.6	31.7833	23.95
2002	2	19	8	26.1	29.8	20.3	1019.9	69	0	0	22.2	19.6	25.9	33.5
2002	2	20	8	26.6	30.5	21.5	1018.3	70	0	0	21.2	10.2	22.2	-
2002	2	21	8	29.1	31.8	21.5	1013.7	65	0	0	26.9	16.3	24.1	39.6
2002	2	22	8	29.4	33	21.5	1013.7	67	0	0	24.6	14.6	22.2	43.2
2002	2	23	8	-	-	-	-	-	-		-	-	-	-
2002	2	24	8	-	-	-	-	-	-		-	-	-	-
2002	2	25	8	28.6	31.3	25.3	-	64	0	0	22.5	13.3	22.2	-
2002	2	8 Average	8	27.96	31.28	22.02
2002	2	26	9	26.9	32.5	22	1014.1	73	0	0	21.6	10.7	24.1	39.6
2002	2	27	9	27.9	31	23	1015.2	73	1.02	1	22.7	8.9	16.5	43.2
2002	2	28	9	29.8	31.7	27.5	1014.9	64	0	0	29.9	12.6	18.3	-
2002	3	1	9	30.5	31.5	26	1015.9	66	0	0	26.2	10.7	16.5	-
2002	3	2	9	-	-	-	-	-	-		-	-	-	-
2002	3	3	9	29.2	31.8	22.6	1013.4	68	0	0	21.7	10.7	20.6	-
2002	3	4	9	29.8	32.9	23	1013.7	69	0	0	20.4	15.9	22.2	39.6
2002	2.57143	9 Average	9	29.0167	31.9	24.0167
2002	3	5	10	30	32	23	1011.9	69	0	0	23	15.6	20.6	39.6
2002	3	6	10	27.8	31.1	23.3	1012.8	78	1.02	1	25.1	3.9	14.8	39.6
2002	3	7	10	29.8	32	23.8	1013.9	70	0	0	23.8	9.1	16.5	35.9
2002	3	8	10	29.8	31	24.5	1015.7	75	7.87	1	18.8	21.9	29.4	44.3
2002	3	9	10	25.9	29.5	23.3	1015	86	3.05	1	10.3	21.9	25.9	44.3
2002	3	10	10	-	-	-	-	-	-		-	-	-	-
2002	3	11	10	26.7	29.5	22	1011.8	77	3.05	1	19.5	11.3	14.8	25.2
2002	3	10 Average	10	28.3333	30.85	23.3167
2002	3	12	11	27.2	31	22	1011.3	75	0	0	23.2	6.7	16.5	-
2002	3	13	11	28.1	32.5	21.6	1011.4	68	0	0	21.4	8.3	13	35.9
2002	3	14	11	28	32	23.4	1010.6	75	2.03	1	18.3	5.4	13	39.6
2002	3	15	11	28.5	31.2	23.5	1013.1	74	0.76	1	21.7	10.9	18.3	32.4
2002	3	16	11	25.8	29	23.3	1014	90	18.03	1	19.8	20.2	27.8	35.9
2002	3	17	11	26.3	29.6	23	1014.2	82	29.97	1	22.4	17.6	24.1	-
2002	3	18	11	27.8	30.4	21	1014.2	73	0	0	19.6	7.6	13	28.7
2002	3	11 Average	11	27.3857	30.8143	22.5429
2002	3	19	12	28.2	31	23	1013.8	73	0	0	26.6	4.8	9.4	39.6
2002	3	20	12	30.4	32.3	23.6	1014.3	67	0	0	22	7.8	16.5	39.6
2002	3	21	12	28.9	31	26	1014.4	68	0	0	18.8	8.5	14.8	-
2002	3	22	12	28.2	31	22.7	1013.2	73	0	0	23.8	5	14.8	39.6
2002	3	23	12	28.6	31.1	23.3	1016.8	68	0	0	26.2	14.8	22.2	39.6
2002	3	24	12	28.6	31	22.9	-	73	0	0	22.5	17.8	25.9	39.6
2002	3	25	12	26.9	30	21	1016.3	69	0	0	23.8	15.2	22.2	35.9
2002	3	12 Average	12	28.5429	31.0571	23.2143
2002	3	26	13	26.8	30.2	21.5	1014.6	74	0	0	26.9	15.7	22.2	32.4
2002	3	27	13	27.8	30.2	20.2	1011.5	73	0	0	18.8	9.4	25.9	35.9
2002	3	28	13	29.7	32.1	23.3	1011.3	74	0	0	22	16.7	22.2	39.6
2002	3	29	13	27.8	31	23.8	1017.1	79	0	0	20.6	9.3	25.9	39.6
2002	3	30	13	28.1	30	23.6	1019.7	66	0	0	21.1	24.6	43.2	-
2002	3	31	13	27.3	30	21.5	1017.9	64	0	0	26.9	13.1	27.8	35.9
2002	3	13 Average	13	27.9167	30.5833	22.3167
2002	4	2	14	27.6	30	18.5	1020.2	66	0	0	22	11.3	32.4	35.9
2002	4	3	14	26.4	30.6	19.8	1018.8	76	0	0	22.9	7	16.5	-
2002	4	4	14	27.9	29.4	21.8	1016.3	77	0.51	1	22.9	12.8	18.3	32.4
2002	4	5	14	27.7	30	21.2	1014.5	75	7.87	1	21.7	7.2	11.1	28.7
2002	4	6	14	28.7	30.6	22	1014.4	74	0	0	26.2	9.6	18.3	39.6
2002	4	7	14	-	-	-	-	-	-		-	-	-	-
2002	4	8	14	28.2	30.1	22.3	1016.5	75	0.25	1	19.6	11.9	18.3	28.7
2002	4	14 Average	14	27.75	30.1167	20.9333
2002	4	9	15	28.4	30.5	25.5	1013.9	74	10.92	1	22	11.1	16.5	28.7
2002	4	10	15	29.6	31	26	1014.5	72	0	0	19.6	9.8	13	35.9
2002	4	11	15	-	-	-	-	-	-		-	-	-	-
2002	4	12	15	26.7	29.8	23	1015.7	80	0	0	22	6.1	14.8	-
2002	4	13	15	27.7	29.6	24.6	1015.1	77	6.1	1	24	6.1	9.4	-
2002	4	14	15	26.4	28	21.5	1014.4	77	7.87	1	26.2	1.1	5.4	-
2002	4	15	15	27.6	29	20.9	1015.2	69	0	0	23.8	8.9	16.5	-
2002	4	15 Average	15	27.7333	29.65	23.5833
2002	4	16	16	25.1	27	21.5	1016.9	78	0.51	1	22	12.6	18.3	32.4
2002	4	17	16	23.3	28	18.6	-	77	0.25	1	21.6	11.5	16.5	-
2002	4	18	16	26.2	28	18	-	70	0	0	18.8	5.6	11.1	35.9
2002	4	19	16	-	-	-	-	-	-		-	-	-	-
2002	4	20	16	-	-	-	-	-	-		-	-	-	-
2002	4	21	16	26.5	28.5	18.9	1017.1	69	0	0	29.9	7.8	14.8	21.7
2002	4	22	16	-	-	-	-	-	-		-	-	-	-
2002	4	16 Average	16	25.275	27.875	19.25
2002	4	23	17	26.6	29	20.4	1016.9	70	0	0	22.4	13.1	18.3	35.9
2002	4	24	17	26.1	29.8	19.5	1016.7	72	0	0	23.2	10.2	20.6	39.6
2002	4	25	17	28.1	29	20.5	-	65	0	0	20.6	15.7	20.6	35.9
2002	4	26	17	26.7	29	18.9	1014	68	0	0	21.6	12.4	18.3	35.9
2002	4	27	17	27.2	29	18.8	-	66	0	0	22.5	14.4	18.3	35.9
2002	4	28	17	26.8	29.4	18	1015	69	0	0	22	3.5	9.4	35.9
2002	4	29	17	26.4	29.1	17.5	1015.3	73	0	0	24.6	6.7	11.1	25.2
2002	4	17 Average	17	26.8429	29.1857	19.0857
2002	4	30	18	26.6	28	17.8	1016.4	72	0	0	22	6.7	14.8	35.9
2002	4	30	18	27.2	29.9	19	1019.6	64	0	0	23	13.1	18.3	28.7
2002	5	1	18	25.9	29.5	18.6	1018	70	0	0	26.2	14.1	20.6	21.7
2002	5	2	18	24.8	28.5	18	1016.1	73	0	0	21.1	4.4	9.4	35.9
2002	5	3	18	27	29	18.4	-	67	0	0	17.5	7.4	16.5	32.4
2002	5	4	18	26.9	29	22.5	-	66	0	0	25.3	12.8	18.3	32.4
2002	5	5	18	26.3	28.2	17.6	-	70	0	0	22.5	5.2	9.4	32.4
2002	5	6	18	26.9	28.5	17.5	1012.9	66	0	0	20.1	10.7	18.3	32.4
2002	4.75	18 Average	18	26.45	28.825	18.675
2002	5	7	19	27.5	30	19.9	1013.4	75	0	0	18.8	10.2	22.2	35.9
2002	5	8	19	25.9	27.3	18	1020	57	0	0	17.9	16.1	22.2	32.4
2002	5	9	19	25.3	27	15.4	1021.5	50	0	0	20.4	11.3	14.8	35.9
2002	5	10	19	23.1	26.5	15.5	1021.5	71	0	0	26.1	12.6	22.2	35.9
2002	5	11	19	25.2	27	21	-	60	0	0	17.5	13.9	18.3	-
2002	5	12	19	27.1	28	26.5	-	56	0	0	15.9	12	16.5	-
2002	5	13	19	25	27.5	14.3	-	66	0	0	25.3	4.6	11.1	35.9
2002	5	19 Average	19	25.5857	27.6143	18.6571
2002	5	14	20	25.7	28	14.9	-	59	0	0	16.4	3.9	5.4	35.9
2002	5	15	20	22.7	27.1	16.7	1022.3	69	0	0	20.4	12	22.2	35.9
2002	5	16	20	24.1	27	17.6	1021	80	0.51	1	25.3	10.6	20.6	35.9
2002	5	17	20	24.6	27	15.5	1020.9	66	1.02	1	21.7	7.4	14.8	21.7
2002	5	18	20	25.6	27	21.5	-	66	0	0	25.3	16.1	24.1	32.4
2002	5	19	20	25	27.6	17.5	1024.6	72	0	0	24.3	17.8	24.1	25.2
2002	5	20	20	25.4	28	18.7	1021.9	74	0	0	18	13.9	18.3	28.7
2002	5	20 Average	20	24.7286	27.3857	17.4857
2002	5	21	21	23.5	26.5	16.8	-	76	0	0	18.8	4.1	9.4	32.4
2002	5	22	21	24.3	28	16.5	1018.1	74	0	0	18.2	6.1	14.8	-
2002	5	23	21	26.8	29	18.4	-	76	0	0	19.8	17	22.2	33.5
2002	5	24	21	25.8	28	22.6	1011.7	83	0	0	17.7	13	29.4	33.5
2002	5	25	21	26.2	28	19.6	-	85	0	0	16.7	12.2	22.2	-
2002	5	26	21	-	-	-	-	-	-		-	-	-	-
2002	5	27	21	-	-	-	-	-	-		-	-	-	-
2002	5	21 Average	21	25.32	27.9	18.78
2002	5	28	22	-	-	-	-	-	-		-	-	-	-
2002	5	29	22	-	-	-	-	-	-		-	-	-	-
2002	5	30	22	-	-	-	-	-	-		-	-	-	-
2002	5	31	22	-	-	-	-	-	-		-	-	-	-
2002	6	1	22	24.4	27	15.1	1015.3	70	0	0	29.9	6.1	11.1	28.7
2002	6	2	22	-	-	-	-	-	-		-	-	-	-
2002	6	3	22	23.8	26	16.9	1024.5	59	0	0	22	19.3	22.2	37
2002	5.42857	22 Average	22	24.1	26.5	16
2002	6	4	23	22.7	26	13.5	1023.8	60	0	0	22	13.5	16.5	35.9
2002	6	5	23	21.8	23.5	14.5	-	64	0	0	17.5	9.8	18.3	25.2
2002	6	6	23	20.4	21.5	18.5	1021.6	95	2.03	1	8.9	3.7	7.6	-
2002	6	7	23	21.4	25.3	16.5	1022.3	83	10.92	1	24	4.8	11.1	-
2002	6	8	23	22.4	27	15.6	1021.8	76	0	0	20	2	5.4	32.4
2002	6	9	23	24.9	26	18	-	72	0	0	22.5	8.1	13	28.7
2002	6	10	23	23.5	27	16.4	1021.9	80	0	0	19	3	7.6	32.4
2002	6	23 Average	23	22.4429	25.1857	16.1429
2002	6	11	24	22.1	23	16.5	1022.3	88	0.51	1	20	6.3	14.8	33.5
2002	6	12	24	22.6	27	17	1021.9	78	8.89	1	24.6	3.5	7.6	10.7
2002	6	13	24	23.6	27.7	17.1	1021	82	0	0	23.2	2.6	7.6	32.4
2002	6	14	24	24.8	27	16.8	-	77	0	0	17.7	8	14.8	35.9
2002	6	15	24	23.8	27	17.8	1019.6	79	0	0	19.6	5.2	14.8	32.4
2002	6	16	24	25	26.3	15.9	-	61	0	0	25.3	11.7	14.8	28.7
2002	6	17	24	21.3	26.3	15.5	-	76	0	0	22.5	9.1	11.1	35.9
2002	6	24 Average	24	23.3143	26.3286	16.6571
2002	6	18	25	-	-	-	-	-	-		-	-	-	-
2002	6	19	25	-	-	-	-	-	-		-	-	-	-
2002	6	20	25	-	-	-	-	-	-		-	-	-	-
2002	6	21	25	-	-	-	-	-	-		-	-	-	-
2002	6	22	25	21.1	23	18	-	72	0	0	25.3	12.4	14.8	-
2002	6	23	25	21.2	24	12.6	-	69	0	0	22.5	5.4	5.4	21.7
2002	6	24	25	21.1	26	13.5	1021.6	68	0	0	20.3	4.6	9.4	32.4
2002	6	25	25	22.4	25	13.5	-	65	0	0	22.2	2.2	5.4	32.4
2002	6	25 Average	25	21.45	24.5	14.4
2002	6	26	26	22.5	26	16	1022.3	75	0	0	24.6	3.9	5.4	28.7
2002	6	27	26	23.4	26.1	16.4	1019.2	74	0	0	21.2	9.3	18.3	32.4
2002	6	28	26	23	27	16.5	1019.3	79	0	0	22.5	4.6	14.8	28.7
2002	6	29	26	22.3	25.4	16.5	-	92	0	0	20.6	0	14.8	-
2002	6	30	26	23.2	26.3	16	-	80	0	0	15	0	-	10.7
2002	7	1	26	21.7	25.2	16	1026	67	0	0	21.7	21.1	29.4	-
2002	7	2	26	20.3	23.5	15.5	1027.2	81	0	0	19.3	10.2	18.3	-
2002	6.28571	26 Average	26	22.3429	25.6429	16.1286
2002	7	3	27	19.2	21.5	13.5	1026.5	82	0.76	1	17.4	9.3	16.5	21.7
2002	7	4	27	21.2	25	15.1	1023.7	70	0	0	21.1	9.8	59.1	-
2002	7	5	27	20.3	24.6	13	1021.7	75	0	0	20.4	4.1	7.6	-
2002	7	6	27	23.5	25.5	21.2	-	76	0	0	26.2	3.7	7.6	-
2002	7	7	27	21.3	25.9	14	1020.1	78	0	0	20.4	3	5.4	32.4
2002	7	8	27	20.8	25.6	14.2	1018.3	78	0	0	11.6	5.6	18.3	-
2002	7	9	27	24.3	26	22	1015.8	77	0	0	16.4	21.5	24.1	-
2002	7	27 Average	27	21.5143	24.8714	16.1429
2002	7	10	28	25	30.6	21	1012.7	68	0	0	18.7	16.7	18.3	-
2002	7	11	28	22.4	25.6	14.6	-	61	0	0	20.6	12	16.5	32.4
2002	7	12	28	21.2	25.5	13.1	1021.5	69	0	0	19.8	4.8	14.8	32.4
2002	7	13	28	22.2	25.5	12.5	1022.8	73	0	0	22.5	1.9	7.6	32.4
2002	7	14	28	20.7	25	13.4	1021.9	72	0	0	21.9	0	-	25.2
2002	7	15	28	20.4	25	12.6	1018.9	76	0	0	24.5	5.6	18.3	35.9
2002	7	16	28	22	26	13.5	1015.5	80	0	0	20.3	11.1	25.9	35.9
2002	7	28 Average	28	21.9857	26.1714	14.3857
2002	7	17	29	22.4	26.7	16	1017.4	85	0	0	19	2.2	5.4	32.4
2002	7	18	29	22.3	25	19	1016.6	91	0.25	1	19.3	5.9	18.3	28.7
2002	7	19	29	21	24.5	16.8	1019.3	93	3.05	1	9.8	7	18.3	-
2002	7	20	29	19.4	22.2	14.5	1021.2	90	18.03	1	15.4	0.4	5.4	7.2
2002	7	21	29	19.9	23.2	16.6	1019.1	90	7.87	1	14.5	5	14.8	-
2002	7	22	29	20.7	24.5	16.8	1018.7	86	33.02	1	19.3	5	13	-
2002	7	23	29	22.8	25	13.8	1020.5	75	0	0	18.3	5	14.8	25.2
2002	7	29 Average	29	21.2143	24.4429	16.2143
2002	7	24	30	22.8	26	14	1018.8	80	0	0	19.5	12.6	24.1	-
2002	7	25	30	22.7	27.5	18	1016.4	85	0	0	14.3	9.3	22.2	35.9
2002	7	26	30	23.7	26.6	20	1019.6	83	0	0	18	5.2	14.8	-
2002	7	27	30	23.7	27	17	1019.1	87	0	0	18.3	7.6	18.3	21.7
2002	7	28	30	25.4	27	20	1020.2	85	0	0	21.4	8.1	18.3	28.7
2002	7	29	30	24	26.4	18	-	85	179.07	1	16.9	8.5	14.8	-
2002	7	30	30	24.4	27.4	17.4	1016.3	79	0	0	18	8.9	18.3	35.9
2002	7	30 Average	30	23.8143	26.8429	17.7714
2002	7	31	31	21.3	25.5	18.4	1025.5	91	6.1	1	18.8	23.2	33.5	35.9
2002	8	1	31	21.3	25.5	17	1026.5	80	0	0	20.6	9.8	18.3	-
2002	8	2	31	20.6	25.2	13.5	1022.8	78	0	0	19.2	0.9	5.4	25.2
2002	8	3	31	25.2	26	24	-	68	0	0	19.3	4.1	7.6	-
2002	8	4	31	23.8	25.2	18.4	-	77	0	0	19.3	13.1	18.3	35.9
2002	8	5	31	22.2	25.6	16	1023.6	80	0	0	19.2	9.1	14.8	21.7
2002	8	6	31	22.6	26	16.3	1023.6	80	0	0	19	5	11.1	35.9
2002	7.85714	31 Average	31	22.4286	25.5714	17.6571
2002	8	7	32	21.7	25.6	17	1025.6	76	0	0	19.3	15.9	31.3	35.9
2002	8	8	32	21.1	24.6	18	1026.8	84	4.06	1	18.3	14.6	24.1	32.4
2002	8	9	32	21.2	25.5	17	1026.4	74	0.51	1	21.4	15.9	22.2	55.4
2002	8	10	32	22.9	26	16	-	73	5.08	1	18.3	8.5	14.8	28.7
2002	8	11	32	22.3	26.3	15.6	1022.1	72	0	0	20.6	3.1	5.4	32.4
2002	8	12	32	22.1	25.8	16	1020.7	82	0	0	19.2	5.7	18.3	-
2002	8	13	32	24.2	27	19	1019.9	83	0	0	17.9	7.8	18.3	35.9
2002	8	32 Average	32	22.2143	25.8286	16.9429
2002	8	14	33	24.2	28	20	1020.2	88	0	0	16.1	6.5	18.3	28.7
2002	8	15	33	25.9	28.1	21	1020.5	85	0	0	22.5	8.1	14.8	28.7
2002	8	16	33	26.1	27.6	23.6	-	81	0	0	22.5	4.3	5.4	-
2002	8	17	33	24.7	27	18	1021.5	82	0	0	21.7	12.6	18.3	35.9
2002	8	18	33	23.6	27.4	17.5	1021.8	74	0	0	23.8	12.6	14.8	35.9
2002	8	19	33	23.5	27.2	18.5	1020.9	79	0	0	23.2	4.8	11.1	32.4
2002	8	20	33	23.2	27	16.5	1022.5	78	0	0	21.4	8.1	13	35.9
2002	8	33 Average	33	24.4571	27.4714	19.3
2002	8	21	34	23.4	27	17	1022.1	72	0	0	18	10.4	14.8	32.4
2002	8	22	34	23.7	27.5	16.8	1020.1	75	0	0	19.2	8	14.8	35.9
2002	8	23	34	25	27	17.5	1021	75	0	0	18.8	4.4	11.1	32.4
2002	8	24	34	25.2	28	18.5	1019.5	78	0	0	22.5	12.8	31.3	-
2002	8	25	34	26.2	29	19.5	1019.8	78	0	0	20	8.1	14.8	-
2002	8	26	34	26.2	28.8	22.6	1019.3	81	0	0	21.4	3	5.4	32.4
2002	8	27	34	26	28.4	22.5	1018	80	0	0	20.6	5.7	11.1	35.9
2002	8	34 Average	34	25.1	27.9571	19.2
2002	8	28	35	24.8	28	19.1	1018.4	80	0	0	19.2	5.4	9.4	32.4
2002	8	29	35	26.3	27.9	22.5	1019.4	72	0	0	23	6.9	14.8	35.9
2002	8	30	35	26.1	28.3	22.5	1018.6	74	0	0	20.6	9.4	18.3	35.9
2002	8	31	35	25.1	28	20.3	-	79	0	0	17.7	3.5	11.1	35.9
2002	9	1	35	24.9	28.2	19.2	1022.2	80	0	0	22	18.1	22.2	35.9
2002	9	2	35	24.4	27	18.8	1022.5	75	0	0	17.1	10.9	20.6	28.7
2002	9	3	35	24.7	27	20	-	72	0	0	19.3	8.7	18.3	-
2002	8.42857	35 Average	35	25.1857	27.7714	20.3429
2002	9	4	36	26.2	28	22.6	1019.8	67	0	0	21.7	12	14.8	35.9
2002	9	5	36	26.8	27.8	22.5	-	76	0	0	19.3	13.1	18.3	39.6
2002	9	6	36	24.3	27.4	19	1020.1	75	4.06	1	24	19.8	25.9	-
2002	9	7	36	24.2	27.4	22.3	-	78	0.51	1	19	14.4	22.2	-
2002	9	8	36	23	27.5	17.4	1018.1	75	4.06	1	20.6	5.9	11.1	21.7
2002	9	9	36	26.2	28	23	1013	76	0	0	20.6	15.6	22.2	32.4
2002	9	10	36	25.4	26.4	23	-	88	0	0	17.5	16.9	22.2	-
2002	9	36 Average	36	25.1571	27.5	21.4
2002	9	11	37	23.3	26.5	18.5	1014.8	69	4.06	1	19.8	13.1	18.3	-
2002	9	12	37	24.3	27	18.8	1019.4	68	0	0	17.9	11.3	18.3	-
2002	9	13	37	21.8	25	16.5	1025.6	69	0	0	19.5	19.3	27.8	40.7
2002	9	14	37	21.7	24.3	16	1029	75	0	0	18.8	20.4	33.5	-
2002	9	15	37	22.3	25.5	17.5	1028.9	71	0	0	24.6	15.6	18.3	28.7
2002	9	16	37	23.3	27	18	1029	65	0	0	19.5	16.1	31.3	-
2002	9	17	37	23.4	26.6	17.5	1025.4	65	0	0	21.6	14.8	22.2	-
2002	9	37 Average	37	22.8714	25.9857	17.5429
2002	9	18	38	23	27	16.5	1022.1	70	0	0	17.7	14.1	20.6	25.2
2002	9	19	38	24.1	27.8	17	1021.5	65	0	0	21.4	6.7	11.1	32.4
2002	9	20	38	24.9	27.4	16.1	1021.4	74	0	0	19.8	9.4	18.3	35.9
2002	9	21	38	24.8	27	19.8	1020.7	73	0	0	19.2	6.7	11.1	32.4
2002	9	22	38	24.5	28	17.1	1019.7	67	0	0	19.5	10.2	22.2	35.9
2002	9	23	38	23.8	27.5	16.5	1019.6	67	0	0	21.6	6.5	9.4	35.9
2002	9	24	38	24.6	27	17	1017	71	0	0	23	12	18.3	28.7
2002	9	38 Average	38	24.2429	27.3857	17.1429
2002	9	25	39	26.2	27.6	23.5	1016.4	67	0	0	26.2	10.7	14.8	-
2002	9	26	39	26.1	28	22.5	1017.1	73	0	0	21.6	13.7	22.2	35.9
2002	9	27	39	26.6	28.8	23.1	1016	83	0	0	19.3	6.7	11.1	35.9
2002	9	28	39	25.8	28.7	20.6	1014.8	82	0	0	20.6	8.9	14.8	32.4
2002	9	29	39	26.8	28.4	24	1012.2	79	0	0	23.8	12.2	14.8	25.2
2002	9	30	39	26.6	28	23.2	1015.2	81	0	0	18.8	5.6	18.3	35.9
2002	10	1	39	25.7	28	22	-	81	0	0	18.3	8.9	18.3	-
2002	9.14286	39 Average	39	26.2571	28.2143	22.7
2002	10	2	40	26.7	29.3	22	1016.3	77	0	0	18.5	7.8	9.4	32.4
2002	10	3	40	26.9	29	21.3	1015.2	74	0	0	18.8	13.1	18.3	25.2
2002	10	4	40	25.9	31	21	1019.4	79	0.25	1	20.6	20	37	-
2002	10	5	40	25.2	27.5	21	1020.9	72	20.07	1	21.6	13.3	18.3	46.5
2002	10	6	40	26.1	28.5	23.7	1016.9	70	0	0	19.6	8.7	14.8	-
2002	10	7	40	25.7	27.7	23	1016.5	76	0	0	18	7	13	21.7
2002	10	8	40	25.6	28.2	22	1018.7	78	6.1	1	14.8	16.1	25.9	-
2002	10	40 Average	40	26.0143	28.7429	22
2002	10	9	41	22.5	25.4	19.6	1021.8	72	0	0	19.8	23	27.8	-
2002	10	10	41	22.8	26.7	15.3	1022.8	64	0	0	21.7	12.8	18.3	-
2002	10	11	41	25.4	27	20.8	1022.5	56	0	0	20.6	15.7	22.2	39.6
2002	10	12	41	25.5	28	21.6	1021.7	61	0	0	26.2	22.2	33.5	39.6
2002	10	13	41	24.8	27	18	1021.3	67	0	0	19.8	11.1	18.3	-
2002	10	14	41	25.4	28	18	1018.8	73	0	0	20.6	7.6	13	39.6
2002	10	15	41	25.6	28	22.6	1018.6	69	0	0	22.5	12.2	24.1	39.6
2002	10	41 Average	41	24.5714	27.1571	19.4143
2002	10	16	42	24.4	27.7	17.5	1016.9	67	0	0	21.4	8.7	18.3	39.6
2002	10	17	42	25.5	28	18.6	1015.6	67	0	0	19.8	10	22.2	39.6
2002	10	18	42	27.3	29	21.6	1013.8	67	0	0	20.4	12.6	16.5	39.6
2002	10	19	42	27.1	30	23	1012.3	70	0	0	21.7	17.2	22.2	39.6
2002	10	20	42	27.1	30	21.6	1019.7	69	0	0	21.6	17.6	24.1	39.6
2002	10	21	42	27.1	29	22	1019.5	70	0	0	21.7	13.5	14.8	39.6
2002	10	22	42	28	29	23.8	1019.2	67	0	0	20.6	10.7	13	39.6
2002	10	42 Average	42	26.6429	28.9571	21.1571
2002	10	23	43	27	29	23.2	-	78	0	0	17.5	9.3	22.2	39.6
2002	10	24	43	28.3	31	24.8	1011.7	76	0	0	17.2	17.4	35.2	39.6
2002	10	25	43	24.4	25.5	23.1	1016.5	84	5.08	1	17.5	23	25.9	40.7
2002	10	26	43	-	-	-	-	-	-		-	-	-	-
2002	10	27	43	26.9	29.1	23.5	1015.5	71	0	0	24.6	9.8	18.3	28.7
2002	10	28	43	27.7	29.6	24.5	1013.2	72	0	0	19.8	14.8	22.2	35.9
2002	10	29	43	27.9	35.5	25.1	1009.5	79	0	0	20.6	15.4	22.2	32.4
2002	10	43 Average	43	27.0333	29.95	24.0333
2002	10	30	44	24.8	27	23	1016	91	3.05	1	16.6	4.1	18.3	25.2
2002	10	31	44	25.7	27	23.5	1017	87	29.97	1	14.5	5.2	14.8	-
2002	11	1	44	23.9	25	21.4	-	92	44.96	1	15.1	0	-	-
2002	11	2	44	26.4	27.7	20.5	1013.7	80	7.11	1	26.2	-	-	-
2002	11	3	44	-	-	-	-	-	-		-	-	-	-
2002	11	4	44	-	-	-	-	-	-		-	-	-	-
2002	11	5	44	-	-	-	-	-	-		-	-	-	-
2002	10.7143	44 Average	44	25.2	26.675	22.1
2002	11	6	45	21.6	23.6	19.6	1018.5	94	6.1	1	8.7	-	-	-
2002	11	7	45	21.4	23.4	16.5	1023.6	85	12.95	1	20.8	-	-	-
2002	11	8	45	22.4	27.8	16.2	1020.2	70	2.03	1	29.9	-	-	-
2002	11	9	45	24.4	27.5	17	1014.3	74	0	0	29.9	-	-	-
2002	11	10	45	25.4	29	20.6	1016.8	78	0	0	29.9	-	-	-
2002	11	11	45	-	-	-	-	-	-		-	-	-	-
2002	11	12	45	25.9	29	18.5	1021.9	63	0	0	29	-	-	-
2002	11	45 Average	45	23.5167	26.7167	18.0667
2002	11	13	46	25.3	27.5	19	-	66	0	0	25.9	-	-	-
2002	11	14	46	25.9	30	22.6	1013	75	0	0	25.3	-	-	-
2002	11	15	46	25.3	27.5	21	1015.8	79	0	0	23.8	0	-	39.6
2002	11	16	46	27.6	28.5	20.5	-	70	0	0	25.3	-	-	-
2002	11	17	46	-	-	-	-	-	-		-	-	-	-
2002	11	18	46	-	-	-	-	-	-		-	-	-	-
2002	11	19	46	-	-	-	-	-	-		-	-	-	-
2002	11	46 Average	46	26.025	28.375	20.775
2002	11	20	47	25.2	30	20.5	1014.6	78	0	0	24.6	-	-	-
2002	11	21	47	26.5	30.8	22.1	1016.8	78	0	0	27.4	-	-	-
2002	11	22	47	26.8	30.5	23.5	1015.3	74	0	0	25.9	-	-	-
2002	11	23	47	28.1	30	23.6	1012.6	73	0	0	26.2	-	-	-
2002	11	24	47	29.1	30.3	24.9	1014.4	68	0	0	29.9	-	-	-
2002	11	25	47	24.6	27	23.3	1017.9	53	0	0	29.9	-	-	-
2002	11	26	47	-	-	-	-	-	-		-	-	-	-
2002	11	47 Average	47	26.7167	29.7667	22.9833
2002	11	27	48	23.8	28	19.6	1020.4	62	0	0	29.9	-	-	-
2002	11	28	48	23.3	28.6	16.4	1016	72	0	0	26.7	-	-	-
2002	11	29	48	26.6	28.7	16.5	1015	68	0	0	29.9	-	-	-
2002	11	30	48	25.4	28	22.5	1021.5	74	0.25	1	29.9	-
2002	12	2	48	25.2	29.4	20.8	1016.8	71	0	0	24.6	0	-	43.2
2002	12	3	48	-	-	-	-	-	-		-	-	-	-
2002	11.3333	48 Average	48	24.86	28.54	19.16
2002	12	4	49	-	-	-	-	-	-		-	-	-	-
2002	12	5	49	27.6	30.7	20	1014.5	71	0	0	29.9	-	-	-
2002	12	6	49	26.7	29.2	21.5	1014.4	78	0	0	25.7	-	-	-
2002	12	7	49	28.6	30.3	20.5	1014.8	62	2.03	1	29.9	-	-	-
2002	12	8	49	27.9	29	20.6	1012.8	72	0	0	29.9	-	-	-
2002	12	9	49	-	-	-	-	-	-		-	-	-	-
2002	12	10	49	27	29.5	22	1015.9	77	0	0	29.9	-	-	-
2002	12	49 Average	49	27.56	29.74	20.92
2002	12	11	50	26.2	29	21.8	1016	80	0.51	1	29.9	-	-	-
2002	12	12	50	28.1	30.5	21.8	1014.9	76	0.76	1	29.9	-	-	-
2002	12	13	50	26.4	30.3	25	-	77	0	0	20.4	4.6	18.3	-
2002	12	14	50	-	-	-	-	-	-		-	-	-	-
2002	12	15	50	29.6	31.5	23.5	1010.7	75	0	0	29.9	-	-	-
2002	12	16	50	29.4	31.4	26.5	1011.2	77	0	0	29.9	-	-	-
2002	12	17	50	-	-	-	-	-	-		-	-	-	-
2002	12	50 Average	50	27.94	30.54	23.72
2002	12	18	51	29.9	32	26.5	1013.3	74	0	0	26.9	-	-	-
2002	12	19	51	-	-	-	-	-	-		-	-	-	-
2002	12	20	51	27.6	31	21	1014.8	79	0.76	1	24.8	-	-	-
2002	12	21	51	27.3	31	21	1014	70	1.02	1	29.9	-	-	-
2002	12	22	51	29.2	31.8	27	1012.5	67	0	0	29.9	-	-	-
2002	12	23	51	27.3	31.3	22.6	1012.1	71	0	0	24.6	-	-	-
2002	12	24	51	29.2	33.4	26.2	1008.4	74	0	0	26.2	-	-	-
2002	12	51 Average	51	28.4167	31.75	24.05
2002	12	25	52	29.1	32.1	25	1010.6	72	0	0	26.2	-	-	-
2002	12	26	52	27.8	31.5	24	1012.1	72	0	0	24	-	-	-
2002	12	27	52	28.4	31.6	25.6	1014.2	73	0	0	29.9	-	-	-
2002	12	28	52	28.3	30.5	26.5	-	73	0	0	25.3	-	-	-
2002	12	29	52	29.3	31.3	26	1014.2	62	0	0	26.9	-	-	-
2002	12	30	52	28.8	31.6	25.5	1015.5	63	0	0	29.9	-	-	-
2002	12	31	52	24.4	28.5	17.1	1017.9	67	0	0	29.9	-	-	-
2002	12	31	52	27.6	32.5	23	1015.3	73	0	0	27.4	-
2002	12	52 Average	52	27.9625	31.2	24.0875
2003	1	1	1	-	-	-	-	-	-		-	-	-	-
2003	1	2	1	29.7	32	26.5	1014.5	67	0	0	18	19.1	22.2	-
2003	1	3	1	29.9	32.5	24.5	1012.4	76	0.51	1	21.6	18.7	24.1	39.6
2003	1	4	1	30.4	33.8	26.5	1011.9	73	0.51	1	19.8	17.8	25.9	35.9
2003	1	5	1	29.3	32	24.5	1014.3	67	1.02	1	19.8	20	27.8	39.6
2003	1	6	1	29.3	31.8	23.9	1013.8	68	0	0	19.6	18.1	24.1	43.2
2003	1	7	1	26.2	28.4	24.5	1012.8	86	1.02	1	14.6	15	22.2	39.6
2003	1	1 Average	1	29.1333	31.75	25.0667
2003	1	8	2	28.8	31	23.1	-	80	5.08	1	20.6	10.7	18.3	-
2003	1	9	2	30.6	33.4	25.3	1009.2	76	1.02	1	21.7	13.7	22.2	28.7
2003	1	10	2	27.3	30	24.5	1012	86	0.51	1	16.7	14.3	24.1	-
2003	1	11	2	24.1	26	21.5	1013.5	84	6.1	1	15.9	18	25.9	-
2003	1	12	2	28.2	30.7	21.3	1012.6	64	0	0	20.6	16.7	22.2	-
2003	1	13	2	26.6	30.6	19.4	1010.9	68	0	0	21.1	8.5	18.3	32.4
2003	1	14	2	28.7	31	23.2	1009.3	72	0	0	20.6	10	18.3	43.2
2003	1	2 Average	2	27.7571	30.3857	22.6143
2003	1	15	3	29.1	31.3	25.2	1013	65	0	0	19.2	7.6	11.1	43.2
2003	1	16	3	29.3	31	26	1011	71	0	0	23	10.2	18.3	39.6
2003	1	17	3	29.4	31.4	26	1012.6	71	0	0	19.8	7	14.8	-
2003	1	18	3	31.3	32	23	1013.9	64	0	0	20.6	8.9	14.8	43.2
2003	1	19	3	30.8	32	26	-	70	0	0	22.5	44.8	-	-
2003	1	20	3	31.1	32	30	-	64	0	0	19.3	15.6	16.5	-
2003	1	21	3	30.9	33.3	26	1011.7	63	0	0	24.6	16.1	25.9	43.2
2003	1	3 Average	3	30.2714	31.8571	26.0286
2003	1	22	4	30.1	34	23.2	1011.7	72	0	0	22.5	18.9	25.9	43.2
2003	1	23	4	30.7	33	27	1011.2	70	0	0	24.6	14.8	18.3	35.9
2003	1	24	4	29.4	32.2	23.5	1009.8	70	0	0	20.6	13.1	22.2	39.6
2003	1	25	4	30.7	32	24.5	-	68	0	0	17.5	9.1	14.8	-
2003	1	26	4	30.2	33.8	26	1008.7	76	3.05	1	20.3	8.3	20.6	43.2
2003	1	27	4	29.2	32.5	24.5	1013.4	75	139.95	1	18.5	21.3	33.5	-
2003	1	28	4	28.1	31.5	24.3	1013.2	70	0	0	23.8	13	22.2	-
2003	1	4 Average	4	29.7714	32.7143	24.7143
2003	1	29	5	28.3	32.5	23	1010.8	72	0	0	19.8	10.4	22.2	39.6
2003	1	30	5	29.7	33	24	1007.5	70	0	0	21.7	9.4	14.8	39.6
2003	1	31	5	30.7	33.5	25	1011.5	70	0	0	18.5	11.5	18.3	43.2
2003	2	1	5	29.9	32	25	1012.8	72	0	0	20.6	10	16.5	39.6
2003	2	2	5	31.9	33	29.8	-	66	0	0	22.5	12.6	18.3	-
2003	2	3	5	29.3	33.3	25.5	1013	70	0	0	22.5	11.5	25.9	39.6
2003	2	4	5	30.2	33.1	27.3	1013.5	80	3.05	1	18.8	10.9	14.8	39.6
2003	1.57143	5 Average	5	30	32.9143	25.6571
2003	2	5	6	31.6	33.3	27.5	1012.8	69	0	0	23	11.5	18.3	35.9
2003	2	6	6	29.8	32.3	26.4	1011.6	75	0	0	23	13.9	33.5	-
2003	2	7	6	29.8	32	25.5	-	76	0	0	20.6	10.2	14.8	-
2003	2	8	6	29.8	32	24.6	-	76	0	0	20.6	1.3	5.4	28.7
2003	2	9	6	31.7	33.6	24	-	68	0	0	19.3	17.2	22.2	32.4
2003	2	10	6	30.9	33	24.4	-	67	0.76	1	20.6	21.5	33.5	39.6
2003	2	11	6	28	30	25	1010.4	80	6.1	1	16.3	25.4	37	-
2003	2	6 Average	6	30.2286	32.3143	25.3429
2003	2	12	7	29.5	33.2	23	1009.2	76	0	0	21.6	13.5	18.3	25.2
2003	2	13	7	28.9	33	23.3	1009	72	0	0	27.4	11.5	22.2	39.6
2003	2	14	7	30	32.5	23.1	1008	70	0	0	22.5	10.9	18.3	35.9
2003	2	15	7	30.2	32.2	26.3	-	71	0	0	18.3	8.1	14.8	-
2003	2	16	7	30.6	33	26.8	1010.1	67	0	0	21.7	11.7	14.8	39.6
2003	2	17	7	29.5	33	26	1011.7	69	0	0	22	13.1	18.3	39.6
2003	2	18	7	30.8	33.5	27.5	1015.1	73	0	0	22.9	17.2	22.2	39.6
2003	2	7 Average	7	29.9286	32.9143	25.1429
2003	2	19	8	30.8	33	27.3	1010.1	71	0	0	20	16.5	18.3	28.7
2003	2	20	8	30.9	33	27.2	1007	75	0	0	20.6	10.7	18.3	32.4
2003	2	21	8	27.9	30	20.4	-	85	0	0	15.6	6.1	13	35.9
2003	2	22	8	-	-	-	-	-	-		-	-	-	-
2003	2	23	8	28.2	33.6	22.4	1008.9	72	13.97	1	22.9	15	18.3	21.7
2003	2	24	8	30.1	32.6	24.4	1008.8	75	0	0	22.5	14.8	20.6	39.6
2003	2	25	8	27.4	30.6	23.5	1011.2	81	6.1	1	16.3	19.6	29.4	39.6
2003	2	8 Average	8	29.2167	32.1333	24.2
2003	2	26	9	29.2	32.9	24	1012.7	69	5.08	1	19.2	23	33.5	50
2003	2	27	9	29.1	30.6	22.4	1010.9	63	0	0	20.4	20.7	25.9	44.3
2003	2	28	9	26.8	32	23.2	-	82	2.03	1	10.6	21.7	25.9	50
2003	3	1	9	-	-	-	-	-	-		-	-	-	-
2003	3	2	9	24.8	25.2	23.9	990.7	95	13.97	1	3.2	49.6	74.1	105.4
2003	3	3	9	-	-	-	-	-	-		-	-	-	-
2003	3	4	9	-	-	-	-	-	-		-	-	-	-
2003	2.57143	9 Average	9	27.475	30.175	23.375
2003	3	5	10	-	-	-	-	-	-		-	-	-	-
2003	3	6	10	28.1	29.3	26.4	1007.8	86	0	0	19.3	10.2	13	28.7
2003	3	7	10	27.5	31.4	26.7	1011.5	89	0.25	1	26.2	7.8	16.5	-
2003	3	8	10	27.9	31.4	24.6	1012.5	74	0	0	21.6	14.4	22.2	-
2003	3	9	10	24.9	29	20.8	-	78	0	0	25.3	8.9	11.1	-
2003	3	10	10	27.7	30.4	22	1014.7	70	0	0	22	10.4	25.2	35.9
2003	3	11	10	27	31	21.9	1014.8	69	0.25	1	22.5	16.5	24.1	25.2
2003	3	10 Average	10	27.1833	30.4167	23.7333
2003	3	12	11	27.1	30	21	1014.7	72	0.25	1	23	15.2	20.6	-
2003	3	13	11	28.1	31.2	21	1011.9	71	0	0	21.1	13.5	16.5	32.4
2003	3	14	11	28.3	31	22.8	-	73	0	0	18.3	8.1	16.5	-
2003	3	15	11	27.9	31.1	22.5	1009.5	78	0	0	21.7	7.2	13	35.9
2003	3	16	11	28.6	31.2	24.7	1010.9	79	0	0	29.9	13.9	51.9	-
2003	3	17	11	29.7	31.9	26.6	1014.9	74	0.25	1	20.6	16.5	18.3	39.6
2003	3	18	11	29.3	31.2	27.2	-	65	0	0	17.5	13.5	16.5	-
2003	3	11 Average	11	28.4286	31.0857	23.6857
2003	3	19	12	29.3	31	27.6	1013.2	68	0	0	29.9	-	-	-
2003	3	20	12	28.6	32.5	22.1	1012.7	73	0	0	19.2	15.6	22.2	35.9
2003	3	21	12	29.4	31.6	23	1011.9	76	0	0	22	10.6	16.5	39.6
2003	3	22	12	30.2	32.4	23.4	1009.1	71	0	0	22	11.1	14.8	39.6
2003	3	23	12	30.7	32	27	1009.8	78	0	0	22	16.1	18.3	39.6
2003	3	24	12	29.8	32.3	25	1009.4	80	0	0	24.6	16.1	18.3	35.9
2003	3	25	12	27.8	32	23.9	1007.6	80	0	0	17.2	9.1	14.8	35.9
2003	3	12 Average	12	29.4	31.9714	24.5714
2003	3	26	13	27.4	31	23.9	1010.5	86	9.91	1	17.1	5.6	14.8	-
2003	3	27	13	27.4	29	25	-	80	0	0	20.6	20.4	25.9	-
2003	3	28	13	27.6	30.5	23	1015.9	70	0.25	1	18.8	18.1	25.9	-
2003	3	29	13	27.9	30	20.6	-	68	0	0	17.5	19.1	22.2	35.9
2003	3	30	13	27.7	31.4	21	1014.2	72	0	0	25.3	14.3	18.3	39.6
2003	3	31	13	27.1	30.4	21.9	1014.1	77	0	0	21.6	9.8	18.3	39.6
2003	4	1	13	28.2	31.4	23.9	1014.9	78	0	0	20.6	6.3	13	-
2003	3.14286	13 Average	13	27.6143	30.5286	22.7571
2003	4	2	14	28.3	30	23.9	1014.6	81	0	0	20.6	6.7	9.4	35.9
2003	4	3	14	28.2	31.8	24.5	1014.3	83	0	0	20.6	8.1	14.8	18
2003	4	4	14	29.2	32	25	1016.3	74	0	0	23	13.5	24.1	-
2003	4	5	14	-	-	-	-	-	-		-	-	-	-
2003	4	6	14	-	-	-	-	-	-		-	-	-	-
2003	4	7	14	30.1	32	26.5	-	55	0	0	25.3	9.6	13	-
2003	4	8	14	28.2	32	20.4	-	64	0	0	18.3	12.2	14.8	35.9
2003	4	14 Average	14	28.8	31.56	24.06
2003	4	9	15	29.6	32	19.5	1007.4	61	0	0	20.4	9.3	14.8	35.9
2003	4	10	15	28.1	31.3	22.8	1013	73	0	0	21.7	15	22.2	39.6
2003	4	11	15	27.7	30	22.7	1018.4	79	0	0	16.7	10.2	18.3	35.9
2003	4	12	15	27.3	30.5	25	1019.4	70	0	0	27.4	13.5	14.8	-
2003	4	13	15	25.4	30.1	22.5	1018.4	81	2.03	1	15.8	10.9	20.6	35.9
2003	4	14	15	25.9	29	21.9	-	75	7.87	1	13.4	15	20.6	28.7
2003	4	15	15	26.5	30.8	22	1017	66	0.51	1	19.6	13	16.5	18
2003	4	15 Average	15	27.2143	30.5286	22.3429
2003	4	16	16	26.7	30.4	19.9	1015.9	68	0	0	23	14.8	18.3	32.4
2003	4	17	16	25.1	30.3	18	1015.6	73	0	0	17.2	10.9	18.3	-
2003	4	18	16	24.8	27.5	20	1015.9	79	0.25	1	23	17.2	22.2	35.9
2003	4	19	16	26.8	29.7	19.5	1015.6	67	2.03	1	21.7	11.1	13	-
2003	4	20	16	25.2	28.6	20.3	1016.4	73	2.03	1	21.7	9.8	14.8	35.9
2003	4	21	16	23.9	29.6	18	1014.8	74	0	0	19	11.1	20.6	37
2003	4	22	16	25.7	28	20	1011.9	74	0	0	21.7	10	14.8	21.7
2003	4	16 Average	16	25.4571	29.1571	19.3857
2003	4	23	17	26	29.2	19.7	1013.7	77	0	0	23	5.6	13	35.9
2003	4	24	17	25.7	29.5	20	-	78	0	0	19.8	3.7	11.1	39.6
2003	4	25	17	26.7	29.4	22.7	1018.6	74	0	0	20.1	7.2	13	-
2003	4	26	17	26.7	30	22	1019.9	70	0	0	20.6	15.2	20.6	35.9
2003	4	27	17	25.2	29	19.4	-	68	0	0	17.7	11.1	18.3	32.4
2003	4	28	17	25.9	28	20	1017.5	64	0.51	1	20.6	15.4	22.2	35.9
2003	4	29	17	25.7	29.4	19	1017.7	64	0	0	21.7	12.2	16.5	35.9
2003	4	17 Average	17	25.9857	29.2143	20.4
2003	4	30	18	25	29	17.9	1016.9	66	0	0	20.6	5.6	11.1	32.4
2003	5	1	18	27.2	28.7	22.6	-	62	0	0	19.3	8.7	13	35.9
2003	5	2	18	25.3	29.1	18.5	1017.4	71	0	0	24.6	7.4	11.1	35.9
2003	5	3	18	24.6	28.4	19.3	1019	75	0	0	22.5	5.6	11.1	32.4
2003	5	4	18	24.2	28	18.4	1014.2	70	0	0	20.6	6.9	14.8	35.9
2003	5	5	18	25.2	28.5	19	1013.9	73	0	0	16.7	5.4	13	35.9
2003	5	6	18	27	29.5	24.5	1019.8	71	0	0	20.4	16.3	20.6	-
2003	4.85714	18 Average	18	25.5	28.7429	20.0286
2003	5	7	19	25.8	28.7	20	1019.5	71	0	0	20.6	18	20.6	28.7
2003	5	8	19	24.1	28.8	17.8	1017.5	75	0	0	21.6	12	16.5	35.9
2003	5	9	19	20.2	22	18.6	-	91	0	0	18.2	6.1	9.4	28.7
2003	5	10	19	-	-	-	-	-	-		-	-	-	-
2003	5	11	19	27.3	28	26.4	-	64	0	0	25.3	11.7	13	-
2003	5	12	19	26.7	28.6	19.4	1012	69	0	0	21.6	14.4	18.3	32.4
2003	5	13	19	22.8	29.6	15.5	1015.7	65	0	0	23	8.9	16.5	35.9
2003	5	19 Average	19	24.4833	27.6167	19.6167
2003	5	14	20	24.6	27	21.8	1022.2	83	0.51	1	14.5	18.7	24.1	-
2003	5	15	20	23.9	26.1	19.5	1025.9	71	7.87	1	15.4	22.2	29.4	-
2003	5	16	20	-	-	-	-	-	-		-	-	-	-
2003	5	17	20	-	-	-	-	-	-		-	-	-	-
2003	5	18	20	-	-	-	-	-	-		-	-	-	-
2003	5	19	20	24.2	27.4	17.7	-	69	0	0	20.6	14.3	20.6	-
2003	5	20	20	23.4	27	17	1022.5	71	0	0	18.2	13.3	18.3	-
2003	5	20 Average	20	24.025	26.875	19
2003	5	21	21	23.8	27.6	18.3	1022.2	80	0	0	22	10.6	14.8	18
2003	5	22	21	22.7	26.5	18.8	1022	88	0	0	21.2	9.4	14.8	-
2003	5	23	21	24.1	27.8	19	1018.4	76	0	0	23.2	9.8	18.3	35.9
2003	5	24	21	23.4	26.5	17.6	1017.2	80	0	0	22.9	3.7	11.1	35.9
2003	5	25	21	26.8	28	17.5	-	70	0	0	21.9	14.4	16.5	32.4
2003	5	26	21	25.2	31	19.6	1012.8	68	0	0	13.8	16.5	20.6	38.9
2003	5	27	21	25.7	28	19	1012.8	68	0	0	11.1	14.6	18.3	35.9
2003	5	21 Average	21	24.5286	27.9143	18.5429
2003	5	28	22	25.2	27	17	1017.1	74	0	0	18.3	13.9	22.2	35.9
2003	5	29	22	24.3	26.5	17	-	70	0	0	18.5	7.2	11.1	28.7
2003	5	30	22	24.9	26.3	22	-	63	0	0	19.3	10.6	16.5	-
2003	5	31	22	23.9	27	15.5	1022.9	68	0	0	19.6	8.7	14.8	35.9
2003	6	1	22	25	29.6	18	1022	61	0.76	1	26.2	5.6	13	32.4
2003	6	2	22	23.5	27	19	-	76	0	0	15.9	7	9.4	-
2003	6	3	22	23.2	27	16	1015.6	73	0	0	17.4	7	13	-
2003	5.42857	22 Average	22	24.2857	27.2	17.7857
2003	6	4	23	24.8	27.1	16	1015.8	71	0	0	20.6	5.4	9.4	32.4
2003	6	5	23	23.4	27.1	16.8	1016.9	78	0	0	20.6	3.3	9.4	35.9
2003	6	6	23	23.8	27	19.8	1017.3	78	0	0	16.7	7.4	11.1	32.4
2003	6	7	23	24.4	26.8	19.1	1015.5	78	0	0	16.9	10	14.8	-
2003	6	8	23	25.5	28	21	-	77	0	0	17.9	5.9	9.4	-
2003	6	9	23	24.4	27.3	18.5	-	82	0	0	12.1	5.6	11.1	28.7
2003	6	10	23	20.9	23	19	-	72	11.94	1	15.6	15.2	18.3	28.7
2003	6	23 Average	23	23.8857	26.6143	18.6
2003	6	11	24	20.8	23	14.5	-	69	0	0	18.3	14.3	18.3	-
2003	6	12	24	23.3	25	16	1023.1	62	0	0	20.6	9.3	13	18
2003	6	13	24	21.2	25.6	14.5	1021	75	0	0	21.1	2.6	7.6	35.9
2003	6	14	24	21.4	26	15	-	70	0	0	17.7	7	13	-
2003	6	15	24	23.2	26.7	15.5	1021.7	69	0	0	23.8	13.5	22.2	32.4
2003	6	16	24	23.1	26	16.9	1022.6	73	7.11	1	17.4	14.4	20.6	32.4
2003	6	17	24	23.7	26	16.6	1021.1	73	0	0	22	7.8	11.1	21.7
2003	6	24 Average	24	22.3857	25.4714	15.5714
2003	6	18	25	24.2	26	16.3	1024.1	71	2.03	1	20.6	18.1	22.2	32.4
2003	6	19	25	21.8	26	16.5	1024.9	77	0	0	20.6	15.2	27.8	32.4
2003	6	20	25	21.1	25	16	-	72	0	0	15.9	11.7	14.8	-
2003	6	21	25	21.6	25.9	15.8	1021.6	82	0	0	24	7.8	11.1	32.4
2003	6	22	25	21.8	25.5	17	1021.6	85	0	0	17.1	4.4	9.4	28.7
2003	6	23	25	22.4	26.2	17	1020.4	81	0	0	22.2	1.9	7.6	21.7
2003	6	24	25	20.8	24.5	16.9	1021.1	83	0	0	15.8	7.2	14.8	32.4
2003	6	25	25	19	22.4	16.5	1022	92	10.92	1	12.2	18.3	25.9	-
2003	6	25 Average	25	21.5875	25.1875	16.5
2003	6	26	26	21.2	29	17.3	1020.9	84	25.91	1	9.3	16.7	20.6	-
2003	6	27	26	19.6	21.4	17.6	1021.4	92	5.08	1	14.2	8.9	14.8	-
2003	6	28	26	18.9	19.4	17.5	1022.9	96	14.99	1	7.9	13.7	24.1	-
2003	6	29	26	20.6	22	18	1022.7	88	123.95	1	16.6	17.8	22.2	-
2003	6	30	26	21.1	24.9	17.3	1020.3	84	0.51	1	18.3	10.7	14.8
2003	7	1	26	20.1	22.4	17	1017.4	80	0	0	18.2	11.5	14.8	18
2003	7	2	26	22.5	26	14.5	-	70	0	0	20.6	8.7	13	-
2003	6.28571	26 Average	26	20.5714	23.5857	17.0286
2003	7	3	27	21.4	22	17	-	78	0	0	19	18.1	25.9	32.4
2003	7	4	27	20.4	24.9	14.6	1022.5	77	0	0	21.6	4.4	9.4	-
2003	7	5	27	19.3	22.5	15	1024.9	78	0	0	20	15.6	29.4	32.4
2003	7	6	27	20.2	23	13.2	1029.8	62	0	0	22	16.7	24.1	-
2003	7	7	27	17.8	23.1	13.1	1030	86	2.03	1	15.1	8.9	18.3	-
2003	7	8	27	18.1	22.6	14	1026.6	78	0	0	19	11.5	18.3	-
2003	7	9	27	20.8	23	15	1025.6	74	0.51	1	19.6	13.1	20.6	21.7
2003	7	27 Average	27	19.7143	23.0143	14.5571
2003	7	10	28	22	24	14	1024.2	66	0	0	22	9.3	14.8	18
2003	7	11	28	22.2	25.1	13.3	1023	67	0	0	23	3.9	7.6	32.4
2003	7	12	28	21.1	23.6	18	1026.8	74	0	0	16.3	10	22.2	-
2003	7	13	28	21.3	22.6	14.6	-	82	0	0	19.5	15.9	24.1	44.3
2003	7	14	28	18.4	23.6	13	1026.8	73	0	0	24.6	13.5	16.5	-
2003	7	15	28	20.2	24	13	1026.7	68	0	0	19.6	8.5	11.1	-
2003	7	16	28	22.7	27.8	13.2	1025.3	69	0	0	21.7	5.2	9.4	35.9
2003	7	28 Average	28	21.1286	24.3857	14.1571
2003	7	17	29	21.1	25.5	12.5	1023.8	76	0	0	21.6	3.9	9.4	32.4
2003	7	18	29	22.1	25	14	-	82	0	0	15.8	6.5	11.1	32.4
2003	7	19	29	-	-	-	-	-	-		-	-	-	-
2003	7	20	29	-	-	-	-	-	-		-	-	-	-
2003	7	21	29	-	-	-	-	-	-		-	-	-	-
2003	7	22	29	-	-	-	-	-	-		-	-	-	-
2003	7	23	29	-	-	-	-	-	-		-	-	-	-
2003	7	29 Average	29	21.6	25.25	13.25
2003	7	24	30	18.5	25	13.6	-	81	0	0	15.8	3.7	9.4	35.9
2003	7	25	30	-	-	-	-	-	-		-	-	-	-
2003	7	26	30	-	-	-	-	-	-		-	-	-	-
2003	7	27	30	-	-	-	-	-	-		-	-	-	-
2003	7	28	30	-	-	-	-	-	-		-	-	-	-
2003	7	29	30	-	-	-	-	-	-		-	-	-	-
2003	7	30	30	-	-	-	-	-	-		-	-	-	-
2003	7	30 Average	30	18.5	25	13.6
2003	7	31	31	-	-	-	-	-	-		-	-	-	-
2003	8	1	31	-	-	-	-	-	-		-	-	-	-
2003	8	2	31	22.4	25	16	-	67	0	0	15.9	8.9	13	-
2003	8	3	31	-	-	-	-	-	-		-	-	-	-
2003	8	4	31	-	-	-	-	-	-		-	-	-	-
2003	8	5	31	20.2	25	14	-	80	0	0	10.9	4.8	9.4	-
2003	8	6	31	21.3	26	16	1025.8	79	0	0	20.3	8.7	11.1	35.9
2003	7.85714	31 Average	31	21.3	25.3333	15.3333
2003	8	7	32	20.8	24.1	16.7	1025.4	82	3.05	1	19.8	10	-	-
2003	8	8	32	23.1	25.6	16.6	1024.6	73	0	0	22	13.1	16.5	18
2003	8	9	32	24.1	25	23	-	72	0	0	20.6	12	13	-
2003	8	10	32	22.7	25.6	14.6	1016.7	76	0	0	18.3	9.4	14.8	28.7
2003	8	11	32	21.8	25.7	14	1017.2	81	0	0	15.9	8.7	14.8	32.4
2003	8	12	32	24.3	26	21.6	1013.8	81	0	0	18.7	15.9	22.2	32.4
2003	8	13	32	23.1	27.5	17	1014.7	82	0	0	12.9	10.7	22.2	32.4
2003	8	32 Average	32	22.8429	25.6429	17.6429
2003	8	14	33	25.1	27	22.1	1015.8	76	0	0	17.1	15.7	22.2	32.4
2003	8	15	33	24.5	26.3	21.8	-	62	0	0	22.5	17.4	20.6	-
2003	8	16	33	22.4	25	13.6	1020.8	68	0	0	23	10.7	13	35.9
2003	8	17	33	20.6	25	12.9	1019.4	71	0	0	23.3	7.4	14.8	35.9
2003	8	18	33	22.9	25.4	15.9	1018.2	64	0	0	19.8	10.7	14.8	35.9
2003	8	19	33	23.9	25.5	20.9	1011.6	75	0	0	22.2	20	24.1	35.9
2003	8	20	33	25.6	28.4	22.8	1011.3	77	0	0	10.8	15.2	25.9	35.9
2003	8	33 Average	33	23.5714	26.0857	18.5714
2003	8	21	34	21.8	25.6	16.4	1022.6	71	0	0	16.7	22	31.3	32.4
2003	8	22	34	20.2	24.6	15.4	1026.3	63	0	0	21.6	15.6	22.2	32.4
2003	8	23	34	19.2	24.5	11.8	1023.6	71	0	0	22	5.4	13	-
2003	8	24	34	22.5	25.1	18.9	1019.1	59	0	0	23.8	10.6	14.8	35.9
2003	8	25	34	23	25.9	18.8	1012	76	0	0	18	14.3	20.6	39.6
2003	8	26	34	22.4	26.2	17.4	1013.8	85	0	0	14.8	9.8	35.2	35.9
2003	8	27	34	19.9	25	13.6	1025.4	68	0	0	23.8	13.3	18.3	32.4
2003	8	34 Average	34	21.2857	25.2714	16.0429
2003	8	28	35	20.5	24.5	12	1023	69	0	0	20.4	8.9	14.8	35.9
2003	8	29	35	23.2	24.4	12.6	-	68	0	0	25.9	11.9	16.5	35.9
2003	8	30	35	22.4	26	14.8	1023.7	64	0	0	24.6	8.7	14.8	35.9
2003	8	31	35	21.3	25.3	14.6	1021.5	76	0	0	26.6	12	46.5	-
2003	9	1	35	23.4	25.5	13.2	1019.6	66	0	0	20.6	7.4	11.1	18
2003	9	2	35	23.4	26.7	16.5	1020.2	76	0	0	23	11.3	18.3	32.4
2003	9	3	35	24.7	26.5	20.1	1020	78	0	0	20.6	9.1	14.8	35.9
2003	8.42857	35 Average	35	22.7	25.5571	14.8286
2003	9	4	36	24.2	27.3	20.6	1018.8	84	0	0	23.5	8.9	16.5	35.9
2003	9	5	36	25.2	27	22.4	1015.6	85	0	0	18.2	12.6	16.5	32.4
2003	9	6	36	19.9	22.8	16.5	1020.8	88	14.99	1	17.2	15.9	24.1	35.9
2003	9	7	36	21.9	25.7	16.6	1021.2	82	7.11	1	18.3	13.9	18.3	-
2003	9	8	36	22.7	25	17.5	1018.5	81	0	0	20.9	6.1	14.8	32.4
2003	9	9	36	25.2	26	19.9	-	70	0	0	22.5	16.7	22.2	35.9
2003	9	10	36	25.4	29	22	1013.2	82	0	0	18.8	18	25.9	39.6
2003	9	36 Average	36	23.5	26.1143	19.3571
2003	9	11	37	26.2	27.2	21.5	1017.9	82	0	0	19	13.9	16.5	35.9
2003	9	12	37	26.4	27.5	23	-	81	0	0	20.6	11.7	13	25.2
2003	9	13	37	25.1	29.7	19.7	1017.9	78	0	0	23.8	13.3	25.9	-
2003	9	14	37	22.8	24.8	21.7	1026	75	1.02	1	16.3	30.7	33.5	59.4
2003	9	15	37	21.3	24	15.9	1026.1	70	0	0	20.1	16.9	22.2	-
2003	9	16	37	22.7	24.4	15.5	1024.8	61	0	0	24	14.8	18.3	25.2
2003	9	17	37	22.1	26.5	16.4	1021	70	0	0	22	12.8	16.5	25.2
2003	9	37 Average	37	23.8	26.3	19.1
2003	9	18	38	21.8	26.3	15	1018.5	76	0	0	23.2	6.9	13	18
2003	9	19	38	24.9	26	15	-	75	0	0	18.2	17.6	20.6	35.9
2003	9	20	38	26	27	21.6	-	74	0	0	18.8	16.7	20.6	35.9
2003	9	21	38	25.8	28	23	1013.6	84	0	0	29.9	15.6	25.9	32.4
2003	9	22	38	24.9	27	22	1016.7	78	0	0	18.8	21.3	33.5	-
2003	9	23	38	22.8	25.3	20.9	1021.4	81	0	0	21.1	20.6	27.8	-
2003	9	24	38	24.8	26.4	18	-	64	0	0	20.6	13.9	20.6	-
2003	9	38 Average	38	24.4286	26.5714	19.3571
2003	9	25	39	23.9	26.2	20.5	1019.1	69	0	0	21.6	7.8	13	39.6
2003	9	26	39	24.7	26.5	21.5	1019.7	69	0	0	20.6	10.6	13	39.6
2003	9	27	39	24.3	27	20.4	1019.1	67	0	0	23.8	18.9	74.1	-
2003	9	28	39	25.3	28	18	1018.6	68	0	0	20.6	11.3	16.5	39.6
2003	9	29	39	25.3	27.5	19.8	1021.6	79	0	0	24	9.3	16.5	39.6
2003	9	30	39	26	29.2	20	1019.6	74	0	0	21.6	7.8	13	35.9
2003	10	1	39	24.8	27.9	18.6	1015.2	80	0	0	23.2	11.3	20.6	35.9
2003	9.14286	39 Average	39	24.9	27.4714	19.8286
2003	10	2	40	26.2	28.5	19.8	1013.9	74	0	0	22.9	15.6	20.6	35.9
2003	10	3	40	25.4	29	19.1	1014.7	79	0	0	16.3	8.5	14.8	35.9
2003	10	4	40	25.9	29.9	22.6	1017	80	0	0	26.9	9.1	14.8	35.9
2003	10	5	40	24.2	27	17.8	1016.4	83	0	0	14.3	5.9	11.1	28.7
2003	10	6	40	26.2	30.6	18.8	1014.1	79	0	0	15.1	9.3	14.8	-
2003	10	7	40	26.2	29.3	21.1	1018.6	67	0	0	24.6	23.2	25.9	35.9
2003	10	8	40	20.9	23	19.3	-	88	0	0	20.6	8	9.4	32.4
2003	10	40 Average	40	25	28.1857	19.7857
2003	10	9	41	-	-	-	-	-	-		-	-	-	-
2003	10	10	41	-	-	-	-	-	-		-	-	-	-
2003	10	11	41	25.3	27.8	22.5	1020.2	79	0	0	26.2	12.2	18.3	32.4
2003	10	12	41	24.9	30	21.3	1019.2	69	0	0	18.8	19.6	27.8	-
2003	10	13	41	24.5	27.5	16	1014.4	61	0	0	21.6	12	16.5	32.4
2003	10	14	41	26.2	27	22.5	-	62	0	0	23.3	15.2	20.6	35.9
2003	10	15	41	26.2	29	23.6	1011.8	74	0	0	20.6	12.8	14.8	39.6
2003	10	41 Average	41	25.42	28.26	21.18
2003	10	16	42	26.8	28.3	25.4	-	78	0	0	20.6	12.6	16.5	-
2003	10	17	42	27.2	29.7	24.7	1008	81	0	0	18.7	16.9	33.5	35.9
2003	10	18	42	19.3	20.8	18	1017.1	89	0	0	9.5	19.3	24.1	32.4
2003	10	19	42	21.9	23	18.5	1020.2	90	6.1	1	7.2	29.6	35.2	-
2003	10	20	42	22.9	24.7	21.4	1021.2	90	32	1	12.4	15	20.6	-
2003	10	21	42	22.8	25	20.4	1019	89	28.96	1	13	11.7	16.5	-
2003	10	22	42	25.6	28.6	19.5	1017.5	75	3.05	1	26.9	10.6	13	-
2003	10	42 Average	42	23.7857	25.7286	21.1286
2003	10	23	43	24.7	28.2	19.5	1016.9	79	0	0	19.6	8.1	14.8	32.4
2003	10	24	43	27.5	28.3	26	-	79	0	0	20.6	14.4	18.3	-
2003	10	25	43	26.7	28.9	24.4	1013.5	83	0	0	26.9	14.4	18.3	39.6
2003	10	26	43	27.4	29.4	24.3	-	83	0	0	26.2	13.7	18.3	32.4
2003	10	27	43	25.8	27.5	24	-	91	0	0	22.5	10.4	16.5	39.6
2003	10	28	43	25.8	28.3	24.6	1019.4	79	0	0	23.5	15.9	18.3	21.7
2003	10	29	43	25.7	28.9	19.6	1018.5	72	0	0	22	12.6	18.3	-
2003	10	43 Average	43	26.2286	28.5	23.2
2003	10	30	44	26.2	29	20.6	-	68	0	0	22	11.7	16.5	35.9
2003	10	31	44	28.1	29	27	-	67	0	0	17.5	11.7	14.8	-
2003	11	1	44	-	-	-	-	-	-		-	-	-	-
2003	11	2	44	27.4	28.3	26.5	-	70	0	0	20.6	15.7	20.6	-
2003	11	3	44	26.9	28	26	-	70	0	0	20.6	13.5	16.5	-
2003	11	4	44	26.1	27.9	21.1	1013.8	72	0	0	24.6	13.7	14.8	21.7
2003	11	5	44	27.3	29.9	24	1007.6	76	0	0	25.3	16.3	22.2	39.6
2003	10.7143	44 Average	44	27	28.6833	24.2
2003	11	6	45	24.4	26	22.6	-	87	3.05	1	13	7.4	14.8	32.4
2003	11	7	45	-	-	-	-	-	-		-	-	-	-
2003	11	8	45	-	-	-	-	-	-		-	-	-	-
2003	11	9	45	27.1	28	22.6	1015.9	58	0	0	20.6	10.2	13	43.2
2003	11	10	45	27	29	22	1013.7	70	0	0	29.9	8.1	11.1	39.6
2003	11	11	45	26.9	29.7	21.1	1014.3	73	0	0	25.1	13	18.3	39.6
2003	11	12	45	28.2	30.2	25.8	1016.2	80	0	0	22	18.3	24.1	-
2003	11	45 Average	45	26.72	28.58	22.82
2003	11	13	46	25.6	28.5	21.8	1020.7	70	0.25	1	17.9	21.7	29.4	32.4
2003	11	14	46	24.8	28	17.8	1018.6	66	0.51	1	23	11.3	14.8	21.7
2003	11	15	46	26.4	28	17.9	-	68	0	0	17.1	9.8	13	35.9
2003	11	16	46	26.6	28.5	20.4	1017.9	74	0.25	1	20.3	15.4	22.2	32.4
2003	11	17	46	27.1	31	21	1018.1	63	0	0	23.8	21.9	25.9	-
2003	11	18	46	26.8	28.3	22.5	-	68	0	0	20.6	9.8	14.8	35.9
2003	11	19	46	-	-	-	-	-	-		-	-	-	-
2003	11	46 Average	46	26.2167	28.7167	20.2333
2003	11	20	47	26.6	28.6	21.4	1013.7	75	2.03	1	24.6	11.7	14.8	-
2003	11	21	47	28.4	30.2	25	1013.3	74	0	0	23.8	14.4	20.6	-
2003	11	22	47	28.6	30	24.8	-	77	0	0	22.5	8.9	13	43.2
2003	11	23	47	27.4	31.6	21.8	1014.6	76	0	0	21.6	16.1	25.9	43.2
2003	11	24	47	27.1	29.7	24.2	-	75	0	0	20.6	10.4	14.8	-
2003	11	25	47	28.3	31	24.8	-	76	0.51	1	18.3	12	18.3	21.7
2003	11	26	47	28.8	31	25	1009.6	80	8.89	1	20.6	11.1	14.8	28.7
2003	11	47 Average	47	27.8857	30.3	23.8571
2003	11	27	48	30.1	31	26.2	1007.5	77	0	0	23.8	13.9	16.5	32.4
2003	11	28	48	29.3	31	26.8	1007.5	81	0	0	22	12.4	18.3	32.4
2003	11	29	48	-	-	-	-	-	-		-	-	-	-
2003	11	30	48	-	-	-	-	-	-		-	-	-	-
2003	12	1	48	25.7	28.4	19.4	1016.3	60	0	0	29.9	18.9	24.1	-
2003	12	2	48	24.9	29	18	1018.5	64	0	0	23	18.9	27.8	43.2
2003	12	3	48	25.5	28.2	18.5	1014.6	64	0	0	23	13.3	16.5	43.2
2003	11.4286	48 Average	48	27.1	29.52	21.78
2003	12	4	49	26.2	30	19.8	1015.2	65	0	0	24.6	19.3	29.4	39.6
2003	12	5	49	-	-	-	-	-	-		-	-	-	-
2003	12	6	49	27.2	29.7	21.6	1014.8	77	0	0	23.8	14.8	20.6	43.2
2003	12	7	49	27	30.3	20.6	1013.6	76	0	0	24.6	10	16.5	43.2
2003	12	8	49	28	32	23.4	1010.9	69	0	0	20.6	13	22.2	43.2
2003	12	9	49	30.3	32	25.8	1006.9	78	0	0	28	16.7	20.6	43.2
2003	12	10	49	30.8	38.4	26	1009	75	1.02	1	18.2	7	13	39.6
2003	12	49 Average	49	28.25	32.0667	22.8667
2003	12	11	50	28.4	32.7	25.7	1009.9	83	1.02	1	17.1	8.3	16.5	25.2
2003	12	12	50	29.3	31.6	25.8	1006.6	82	0	0	19.5	19.1	25.9	35.9
2003	12	13	50	30.9	32	26.3	-	78	0	0	25.3	13.7	16.5	39.6
2003	12	14	50	31	32	25	-	72	0	0	25.3	20.4	24.1	43.2
2003	12	15	50	28.4	32.4	25	1009.5	81	0	0	19	9.6	14.8	43.2
2003	12	16	50	28.5	32.5	24	1013.3	72	0	0	22.5	24.1	27.8	28.7
2003	12	17	50	28.7	33.3	22.6	1010.8	73	0	0	19.8	15.6	24.1	39.6
2003	12	50 Average	50	29.3143	32.3571	24.9143
2003	12	18	51	31.8	38	27	1011.5	49	0	0	22	17.4	20.6	-
2003	12	19	51	30.1	31.8	23.1	1012.9	64	0	0	23.8	18.5	27.8	39.6
2003	12	20	51	28.8	31.4	23.2	1011.9	73	0	0	24.3	11.3	18.3	35.9
2003	12	21	51	31.1	32	26.4	-	73	0	0	24.1	20.9	22.2	39.6
2003	12	22	51	-	-	-	-	-	-		-	-	-	-
2003	12	23	51	30.6	31.9	27	-	70	0	0	20.6	16.9	20.6	-
2003	12	24	51	29.9	31.9	26.2	1013.4	72	0	0	26.2	13.7	18.3	35.9
2003	12	51 Average	51	30.3833	32.8333	25.4833
2003	12	25	52	31.5	33.1	29.5	-	67	0	0	20.6	19.3	22.2	-
2003	12	26	52	-	-	-	-	-	-		-	-	-	-
2003	12	27	52	29.2	32.3	26	1010.1	73	0.25	1	17.1	25	37	39.6
2003	12	28	52	28.6	30	23.4	-	62	0.25	1	22.5	23	24.1	-
2003	12	29	52	26.8	30	20.1	1015	65	0	0	20.6	14.6	20.6	21.7
2003	12	30	52	27.8	30	24	1014.9	65	0	0	21.4	13.5	16.5	43.2
2003	12	31	52	28.8	31	25.3	1014.2	68	0	0	23	10.2	16.5	43.2
2003	12	52 Average	52	28.7833	31.0667	24.7167
2004	1	1	1	27.7	30	23	-	68	0	0	29.9	10.2	18.3	-
2004	1	2	1	27.9	31.3	21.7	-	74	0	0	20.6	14.6	20.6	39.6
2004	1	3	1	29.5	32.6	25.1	-	74	0	0	25.3	18.7	24.1	39.6
2004	1	4	1	26.5	29.5	22.5	-	75	2.03	1	18.8	24.1	29.4	39.6
2004	1	5	1	26.5	29.5	19.5	1018.3	62	0	0	26.9	18	22.2	28.7
2004	1	6	1	29.1	31	20.9	1015	61	0	0	19.6	13.5	18.3	35.9
2004	1	7	1	28.8	30.9	25.8	1012.2	64	0	0	20.6	11.1	18.3	-
2004	1	1 Average	1	28	30.6857	22.6429
2004	1	8	2	-	-	-	-	-	-		-	-	-	-
2004	1	9	2	29.9	32.1	23	-	67	0	0	19.3	12.4	14.8	43.2
2004	1	10	2	31.6	32.8	26.6	-	67	0	0	17.5	18.5	20.6	39.6
2004	1	11	2	30.9	33.7	17.1	1013.5	72	0	0	24.6	17.2	20.6	43.2
2004	1	12	2	30	33.2	25	1014.2	74	0	0	23.8	15	22.2	35.9
2004	1	13	2	29.4	32.8	23.7	1012.4	72	0	0	24.6	13.9	20.6	-
2004	1	14	2	-	-	-	-	-	-		-	-	-	-
2004	1	2 Average	2	30.36	32.92	23.08
2004	1	15	3	31.8	35.8	27.3	1007.3	69	0	0	26.9	13.9	14.8	39.6
2004	1	16	3	31.9	33	27.5	-	68	0	0	23.8	13	14.8	39.6
2004	1	17	3	-	-	-	-	-	-		-	-	-	-
2004	1	18	3	29.7	31	22.9	-	70	12.95	1	18.3	17.4	22.2	-
2004	1	19	3	29.7	31.7	25.5	1011.3	62	0	0	26.9	15.2	20.6	28.7
2004	1	20	3	29.2	31.4	24	1009.4	71	0	0	24.6	8.1	14.8	43.2
2004	1	21	3	26.4	27.3	25	1009.3	91	12.95	1	13.4	10.4	16.5	39.6
2004	1	3 Average	3	29.7833	31.7	25.3667
2004	1	22	4	29.2	30.6	28	1008.4	80	0.76	1	18	8.7	11.1	-
2004	1	23	4	29.4	30.3	28	1005.6	86	0	0	26.9	13.3	16.5	-
2004	1	24	4	28.9	30.5	24	-	85	6.1	1	20.6	4.6	11.1	28.7
2004	1	25	4	30.6	33.2	28	1003.7	81	0	0	26.9	9.4	20.6	25.2
2004	1	26	4	32	33.5	27.8	1005.3	76	0	0	23	15	22.2	-
2004	1	27	4	31.9	33.9	26.9	1007.5	69	0	0	24.6	18.9	27.8	39.6
2004	1	28	4	30.4	33	24.3	1004.5	73	0.51	1	18.2	16.5	22.2	39.6
2004	1	4 Average	4	30.3429	32.1429	26.7143
2004	1	29	5	28.3	32.5	23.5	1005.2	80	0.76	1	18.5	13.7	20.6	28.7
2004	1	30	5	29.8	31	28	-	76	5.08	1	18.8	20.4	24.1	-
2004	1	31	5	27.3	31.4	24.1	1010	83	0	0	21.7	20.9	31.3	-
2004	2	1	5	30.4	34	23.5	1005.8	63	0	0	22	27.4	29.4	-
2004	2	2	5	27.9	31	22.6	1004.7	73	1.02	1	16.7	20.2	29.4	53.5
2004	2	3	5	25	32	23.4	-	79	41.91	1	24.1	21.3	27.8	-
2004	2	4	5	26.9	30	21.5	1008.2	71	0	0	22	14.8	18.3	39.6
2004	1.57143	5 Average	5	27.9429	31.7	23.8
2004	2	5	6	28.7	31.8	22.6	-	68	0	0	22	21.7	25.9	39.6
2004	2	6	6	27.8	32.3	21	1013.1	66	0	0	21.4	15.2	20.6	39.6
2004	2	7	6	27.8	31	22.1	1014.4	70	0	0	21.7	14.8	20.6	39.6
2004	2	8	6	26.2	30	21.4	1016	74	0	0	29.9	14.4	16.5	39.6
2004	2	9	6	27.8	30	22	1015.8	72	0	0	23.2	9.8	14.8	35.9
2004	2	10	6	26.4	29.9	22	1016.7	80	5.08	1	14.2	11.7	20.6	25.2
2004	2	11	6	27.1	30	22.4	1013.3	76	1.02	1	21.6	10.4	16.5	21.7
2004	2	6 Average	6	27.4	30.7143	21.9286
2004	2	12	7	28.5	31.3	23.6	1011.7	75	0	0	21.6	6.7	13	25.2
2004	2	13	7	29.4	31	26	1013.4	70	0	0	20.6	10.6	13	35.9
2004	2	14	7	29.8	31	24.6	1012	73	0	0	23.8	12.2	16.5	39.6
2004	2	15	7	30.1	31.5	27.9	-	73	0	0	20.4	16.7	24.1	-
2004	2	16	7	30.3	32.4	25.4	1015.2	72	0	0	25.3	14.1	18.3	32.4
2004	2	17	7	29.6	32	25.1	1015.5	77	0	0	19.6	13.5	20.6	35.9
2004	2	18	7	29.9	32.5	24.6	1013	74	0	0	20.4	18.3	25.9	32.4
2004	2	7 Average	7	29.6571	31.6714	25.3143
2004	2	19	8	29	32	22.5	1012.6	69	0	0	19.8	15.2	24.1	25.2
2004	2	20	8	29	32	22	1013.2	71	0	0	20.6	16.9	22.2	39.6
2004	2	21	8	27.6	30.5	22	-	76	0	0	25.3	-	-	-
2004	2	22	8	28.8	31.7	25	1010.6	80	2.03	1	18.8	6.5	14.8	39.6
2004	2	23	8	29.7	32.5	27	1008.6	75	0.51	1	23.8	11.3	16.5	28.7
2004	2	24	8	31.3	33	27.6	1010.4	73	0	0	25.3	15.6	18.3	35.9
2004	2	25	8	30.7	33	27.8	1012.5	74	0	0	21.6	12.8	16.5	35.9
2004	2	8 Average	8	29.4429	32.1	24.8429
2004	2	26	9	30.7	33.3	27.9	1011.6	73	0	0	24.6	13.5	16.5	61.1
2004	2	27	9	27.9	29.3	25.6	1009.4	88	7.87	1	18.5	5.2	9.4	32.4
2004	2	28	9	28.9	32.2	24.6	1007.2	81	7.87	1	17.5	12.8	18	-
2004	2	29	9	27.6	30.5	23.8	1007.3	85	6.1	1	20.4	12.2	16.5	18
2004	3	1	9	26.7	29.8	23.4	1009.4	83	6.1	1	15.6	17.6	27.8	-
2004	3	2	9	27.6	29.8	24.2	-	89	35.05	1	21.1	-	-	-
2004	3	3	9	27.3	29.5	25.8	1010.3	93	8.89	1	12.1	-	-	-
2004	3	4	9	29.8	31	25.3	1011.4	83	29.97	1	24.6	12.4	13	-
2004	2.5	9 Average	9	28.3125	30.675	25.075
2004	3	5	10	30.6	31.7	26.8	-	73	0	0	22.5	9.4	11.1	35.9
2004	3	6	10	27.8	31	25	-	91	10.92	1	9.5	-	-	-
2004	3	7	10	28.9	31	23.6	-	73	3.05	1	20.6	18.5	25.9	-
2004	3	8	10	28.5	31	23.5	1010	75	2.03	1	18.5	21.7	27.8	32.4
2004	3	9	10	28.4	31.4	24.4	1007.9	84	4.06	1	16.3	15.4	20.6	42.4
2004	3	10	10	28.6	32.5	24	1008.5	71	0	0	23.8	16.7	20.6	21.7
2004	3	11	10	29.2	32	22.8	1007.6	64	0	0	22	17.2	18.3	35.9
2004	3	10 Average	10	28.8571	31.5143	24.3
2004	3	12	11	27.6	30.5	21.9	-	72	0	0	20.6	-	-	-
2004	3	13	11	-	-	-	-	-	-		-	-	-	-
2004	3	14	11	25.7	28	21.3	-	74	14.99	1	18.2	18.1	22.2	-
2004	3	15	11	25.9	30	20.5	1018.8	80	0.25	1	17.9	16.9	29.4	-
2004	3	16	11	27	29.5	20.6	-	68	0.51	1	22.5	10.4	13	21.7
2004	3	17	11	28	30	21.1	1012.9	70	0	0	23	8.5	13	28.7
2004	3	18	11	-	-	-	-	-	-		-	-	-	-
2004	3	11 Average	11	26.84	29.6	21.08
2004	3	19	12	28.8	31	21.8	1013.6	77	0	0	24.6	4.8	11.1	35.9
2004	3	20	12	30	32	29	-	74	0	0	15.9	9.3	11.1	-
2004	3	21	12	28.8	31.2	23.5	1012.9	76	0	0	26.2	9.6	13	35.9
2004	3	22	12	-	-	-	-	-	-		-	-	-	-
2004	3	23	12	30.2	31	26	-	71	0	0	18.8	17.4	20.6	39.6
2004	3	24	12	29.9	30.5	27	-	76	0	0	20.6	13	14.8	39.6
2004	3	25	12	29.8	31.4	26.4	1011.5	78	0	0	23	11.5	16.5	21.7
2004	3	12 Average	12	29.5833	31.1833	25.6167
2004	3	26	13	26.2	27.8	24.5	-	89	1.02	1	12.9	5.9	13	28.7
2004	3	27	13	-	-	-	-	-	-		-	-	-	-
2004	3	28	13	29.7	30	23.5	-	76	0	0	20.6	8.9	9.4	28.7
2004	3	29	13	27.9	30.2	24	1014.9	83	0	0	23	8	11.1	25.2
2004	3	30	13	-	-	-	-	-	-		-	-	-	-
2004	3	31	13	28.8	31	23	-	77	0	0	19	15.6	22.2	35.9
2004	4	1	13	28.9	31	23	-	72	0	0	19.3	16.3	25.9	28.7
2004	3.14286	13 Average	13	28.3	30	23.6
2004	4	2	14	27	29	22.2	-	82	1.02	1	19.5	15.9	24.1	32.4
2004	4	3	14	-	-	-	-	-	-		-	-	-	-
2004	4	4	14	28.5	30.4	26	-	79	0	0	25.3	-	-	-
2004	4	5	14	29	31.3	26.5	1015.8	78	0	0	23.8	11.5	13	32.4
2004	4	6	14	29.7	30.5	25.6	1016.6	73	0	0	22	9.1	13	35.9
2004	4	7	14	28.2	31.4	23.5	1017.3	73	0	0	20.6	6.7	13	32.4
2004	4	8	14	26	29	23.5	1015.9	83	0	0	17.1	9.3	24.1	39.6
2004	4	14 Average	14	28.0667	30.2667	24.55
2004	4	9	15	26.7	29.8	19.7	-	66	10.92	1	20.6	14.1	16.5	-
2004	4	10	15	28	30	19.6	-	63	0	0	18.8	5.2	9.4	35.9
2004	4	11	15	26.8	30	21.1	-	74	0	0	22.5	11.3	20.6	-
2004	4	12	15	25.9	29	20.6	1019.3	71	0.25	1	16.6	24.1	48.2	68.3
2004	4	13	15	24.1	28	20.5	1016.7	79	4.06	1	17.1	18.1	25.9	44.3
2004	4	14	15	23.2	25.3	19.9	-	90	10.92	1	13	17.2	18.3	21.7
2004	4	15	15	27.6	31	22	1011.2	70	0	0	20.6	14.8	20.6	-
2004	4	15 Average	15	26.0429	29.0143	20.4857
2004	4	16	16	27.2	30.1	21	1013	71	0	0	20	11.7	20.6	35.9
2004	4	17	16	29.2	30	22.5	-	72	0	0	19.3	14.4	18.3	32.4
2004	4	18	16	27.9	30	23	1015.8	85	0	0	20.4	3.7	11.1	32.4
2004	4	19	16	27.5	30	23	1015.9	77	0	0	21.7	8.5	16.5	21.7
2004	4	20	16	29.2	30	23	-	80	0	0	17.5	10	11.1	32.4
2004	4	21	16	27.1	30	23.3	1016	89	20.07	1	13.4	3.5	14.8	25.2
2004	4	22	16	28.4	30.8	24.3	1013.6	77	0	0	21.2	4.6	11.1	25.2
2004	4	16 Average	16	28.0714	30.1286	22.8714
2004	4	23	17	28.3	29.5	25.4	1016.2	76	0	0	22	12	22.2	35.9
2004	4	24	17	27.4	28.7	24.9	1019.1	65	0.25	1	21.1	19.8	22.2	-
2004	4	25	17	25.9	29	20.2	1017.5	69	0	0	23.8	10.2	14.8	35.9
2004	4	26	17	25.6	28.5	20.4	-	71	0	0	15.8	14.3	22.2	32.4
2004	4	27	17	24.6	27.5	20.1	1022	72	3.05	1	17.9	21.3	29.4	-
2004	4	28	17	23.4	26	17.4	1021.5	69	2.03	1	21.6	16.5	20.6	32.4
2004	4	29	17	23.3	27	18.5	1019.1	75	4.06	1	20.6	13.5	25.2	28.7
2004	4	17 Average	17	25.5	28.0286	20.9857
2004	4	30	18	24.9	26.7	17.2	1018.6	74	0	0	23.8	10.7	18.3	25.2
2004	5	1	18	23.6	25	18	-	78	0.51	1	15.1	4.3	14.8	28.7
2004	5	2	18	25.3	28.6	18.6	1017.9	78	0.51	1	24.6	8.5	14.8	-
2004	5	3	18	23.3	27.8	18.7	1019	81	2.03	1	22.5	10	16.5	28.7
2004	5	4	18	22.8	28.4	18.2	1020.1	76	0	0	19.6	15.6	24.1	25.2
2004	5	5	18	21.8	28	16.9	1019.4	76	0	0	22	13.3	20.6	32.4
2004	5	6	18	23.8	27.9	17.7	1019.9	76	0	0	23	16.9	20.6	28.7
2004	4.85714	18 Average	18	23.6429	27.4857	17.9
2004	5	7	19	23.3	28.4	19	1018.5	84	0	0	20.6	13.1	18.3	32.4
2004	5	8	19	24.4	28	19.5	1017.5	83	0	0	13.2	12.6	16.5	21.7
2004	5	9	19	24.3	27.5	19.5	1017.9	86	0	0	20.1	11.7	20.6	28.7
2004	5	10	19	25.2	28.6	17.5	1018.9	77	3.05	1	21.1	14.1	20.6	25.2
2004	5	11	19	23.1	28	17.8	1019	78	0	0	21.2	26.9	-	-
2004	5	12	19	23.6	28	18	1016.8	82	0	0	16.1	4.6	9.4	35.9
2004	5	13	19	23.9	27	17	1014.2	82	0	0	14.5	5.9	11.1	35.9
2004	5	19 Average	19	23.9714	27.9286	18.3286
2004	5	14	20	25.3	28	17.5	-	83	0	0	13.4	5.4	9.4	32.4
2004	5	15	20	24.2	27	18.4	-	75	23.88	1	15.4	10	14.8	28.7
2004	5	16	20	24.3	26.1	17	-	74	0	0	20.3	6.5	13	21.7
2004	5	17	20	22.6	25.9	16	1020.1	69	0	0	19.3	10.9	14.8	18
2004	5	18	20	23.9	26	15.6	1022	73	0	0	21.1	11.9	16.5	28.7
2004	5	19	20	22.1	26.3	15.2	1022.3	70	0	0	20	7.6	14.8	28.7
2004	5	20	20	23.6	26.2	14.5	-	67	0	0	20.4	10.4	13	35.9
2004	5	20 Average	20	23.7143	26.5	16.3143
2004	5	21	21	23.2	27	14.5	1021.6	71	0	0	24	5.6	9.4	32.4
2004	5	22	21	22.4	27.2	15.9	1023.4	67	0	0	22	12.8	16.5	35.9
2004	5	23	21	21.6	26.9	13.5	1023.6	75	0	0	22.7	7.4	11.1	35.9
2004	5	24	21	22.2	27	15	1022.7	75	0	0	17.7	8.9	16.5	35.9
2004	5	25	21	24.7	27	18	1022.5	76	3.05	1	21.2	11.1	14.8	35.9
2004	5	26	21	23.1	27.2	16.6	1023.9	73	0	0	24.6	11.7	14.8	32.4
2004	5	27	21	24.2	26	21	-	76	0.51	1	17.9	12.2	18.3	-
2004	5	21 Average	21	23.0571	26.9	16.3571
2004	5	28	22	23.9	26.6	17.4	1023.4	73	0	0	18.3	8.1	14.8	18
2004	5	29	22	23.3	26	14.9	-	72	0	0	15.6	8	14.8	32.4
2004	5	30	22	21.9	24.8	18	-	74	0	0	14.2	18.9	24.1	32.4
2004	5	31	22	21.1	25.5	14.5	1023.2	63	0	0	21.1	14.1	20.6	-
2004	6	1	22	20.7	26.3	13.5	1023.8	65	0	0	22	13.5	20.6	35.9
2004	6	2	22	20.9	23.8	15	1027.5	74	0	0	21.7	17.4	22.2	28.7
2004	6	3	22	18.9	22	15.4	-	86	1.02	1	19	12	22.2	-
2004	5.42857	22 Average	22	21.5286	25	15.5286
2004	6	4	23	20.6	24	16	1025.3	81	5.08	1	17.5	12.4	24.1	-
2004	6	5	23	21.6	25.4	15.7	1022.4	78	6.1	1	25.3	7	14.8	-
2004	6	6	23	20.2	26	15.9	1021.6	85	0	0	25.3	2.8	5.4	21.7
2004	6	7	23	22.4	25	15.5	-	80	0	0	14.2	10	18.3	28.7
2004	6	8	23	24.3	26	16.2	1018.9	80	0	0	26.2	8.9	16.5	28.7
2004	6	9	23	21.2	24.3	17.5	1026.2	81	0	0	19.8	18.9	31.3	51.9
2004	6	10	23	20.9	25	16.2	1027.6	76	0.76	1	23	20.2	25.9	-
2004	6	23 Average	23	21.6	25.1	16.1429
2004	6	11	24	22.6	25.2	14.3	-	59	0.51	1	19.3	17.4	22.2	-
2004	6	12	24	-	-	-	-	-	-		-	-	-	-
2004	6	13	24	-	-	-	-	-	-		-	-	-	-
2004	6	14	24	23.4	26	12	-	62	0	0	19.2	8	11.1	35.9
2004	6	15	24	20.6	26.5	14	1018.1	78	0	0	11.6	7.8	13	-
2004	6	16	24	21.2	26	15	1022.1	86	0	0	14.6	5.6	13	-
2004	6	17	24	21.5	26.3	14.5	1026.4	76	0	0	14.2	11.1	18.3	32.4
2004	6	24 Average	24	21.86	26	13.96
2004	6	18	25	20.8	25.2	14.4	1027.1	77	3.05	1	20.3	11.3	16.5	35.9
2004	6	19	25	22.6	25.5	14.5	1024.6	82	2.03	1	22	12.2	32.4	-
2004	6	20	25	21.8	26	15	1024	85	0.25	1	21.1	10	18.3	28.7
2004	6	21	25	21.7	26	15	1023.5	75	0	0	18.2	8.7	13	21.7
2004	6	22	25	22.8	26	17	1024	70	0	0	22	8.5	11.1	25.2
2004	6	23	25	23.4	26.3	13.5	1023.4	57	0	0	20.6	13.1	16.5	28.7
2004	6	24	25	21.6	25.4	15	1023.7	72	0	0	23.8	13.5	16.5	35.9
2004	6	25	25	22.3	25.4	18.5	1024.3	84	0.76	1	24	8.3	13	35.9
2004	6	25 Average	25	22.125	25.725	15.3625
2004	6	26	26	23.2	25.2	15.5	1024.5	76	0	0	23.8	5.2	9.4	28.7
2004	6	27	26	23.8	26.5	17	1023.4	85	0	0	19.3	4.8	11.1	-
2004	6	28	26	23.2	25.5	18.5	1024.3	92	0	0	19	3.3	16.5	28.7
2004	6	29	26	22.7	25	19.5	1024.7	85	0	0	23	7.8	11.1	-
2004	6	30	26	24.4	26.6	17.6	1022.9	80	0	0	17.7	7.6	13	-
2004	7	1	26	22.4	26.4	17	1023.2	88	0	0	13.7	5.2	11.1	32.4
2004	7	2	26	-	-	-	-	-	-		-	-	-	-
2004	6.28571	26 Average	26	23.2833	25.8667	17.5167
2004	7	3	27	23.5	26.9	16	1019.8	79	0	0	18.2	11.3	20.6	32.4
2004	7	4	27	22.9	25.8	13.5	1020.3	83	0	0	17.9	9.1	14.8	32.4
2004	7	5	27	22.7	25	14.5	1024.9	78	0	0	11.9	20.4	31.3	32.4
2004	7	6	27	21.1	23.9	15	1027	62	0	0	19.3	19.6	27.8	-
2004	7	7	27	18.4	21.5	13.6	1026.2	81	0.51	1	16.6	17.8	24.1	25.2
2004	7	8	27	18.7	23	12.6	1024.7	75	0	0	22	15	18.3	-
2004	7	9	27	21.1	24.8	15.1	1022.5	75	0	0	21.7	10.9	14.8	21.7
2004	7	27 Average	27	21.2	24.4143	14.3286
2004	7	10	28	20.2	24	12.6	1021.8	75	0	0	22	5.6	9.4	35.9
2004	7	11	28	22.7	25	15	1023.3	68	0	0	20.6	13.1	16.5	25.2
2004	7	12	28	21.2	24.4	15	1020.5	74	0	0	20.6	9.3	13	35.9
2004	7	13	28	22.6	28	12.6	1018	49	0	0	16.6	13.1	20.6	25.2
2004	7	14	28	19.6	22	14	-	64	0.25	1	18.2	23.9	29.4	64.8
2004	7	15	28	19.8	23.9	13	1026.3	70	0	0	22.5	19.4	24.1	25.2
2004	7	16	28	19.4	24	12	1025.2	66	0	0	21.7	15.7	18.3	32.4
2004	7	28 Average	28	20.7857	24.4714	13.4571
2004	7	17	29	21.4	25	15	-	72	0	0	20.6	13.3	16.5	32.4
2004	7	18	29	21.8	25	14	1023.5	69	0	0	20.3	13	20.6	35.9
2004	7	19	29	21.7	24	17	1023.8	72	4.06	1	17.4	19.3	24.1	-
2004	7	20	29	21.2	24.8	15	1020.5	71	0	0	18.8	9.3	13	-
2004	7	21	29	20.6	24.9	13	1019.5	75	0	0	21.1	5.6	13	28.7
2004	7	22	29	22	25.8	17	1019.3	75	0	0	19.6	6.7	13	28.7
2004	7	23	29	23.9	26	16.5	-	75	0	0	17.5	14.6	20.6	-
2004	7	29 Average	29	21.8	25.0714	15.3571
2004	7	24	30	25.3	26	23.4	-	73	0	0	18.2	16.1	24.1	-
2004	7	25	30	22.2	26	14.5	-	84	0	0	9	9.6	20.6	32.4
2004	7	26	30	25.3	26	24	-	75	0	0	14	12	14.8	-
2004	7	27	30	25.1	27	22	1018.3	82	0	0	17.5	13.7	18.3	32.4
2004	7	28	30	24.3	26	19	1020.2	83	0	0	19.3	8.9	13	28.7
2004	7	29	30	24	26.5	19	1019.5	81	0.51	1	15	10.6	13	25.2
2004	7	30	30	23.3	25	16	1017.5	82	0	0	16.3	12.4	22.2	28.7
2004	7	30 Average	30	24.2143	26.0714	19.7
2004	7	31	31	25.2	26	21.6	1016.9	76	0	0	21.2	18.5	22.2	28.7
2004	8	1	31	25	27	19.3	1023.3	74	0	0	26.9	14.4	16.5	32.4
2004	8	2	31	24.2	26	20	1025.6	74	0	0	24.6	13.5	16.5	35.9
2004	8	3	31	23	25.8	20	1023.2	70	0	0	20.6	10.6	13	-
2004	8	4	31	20.3	25.3	13	1020.6	81	0	0	13.5	8.7	13	35.9
2004	8	5	31	21.5	26	13	1019.9	78	0	0	13.8	9.1	16.5	35.9
2004	8	6	31	21.8	26.4	13	1018.5	78	0	0	13.7	9.8	16.5	35.9
2004	7.85714	31 Average	31	23	26.0714	17.1286
2004	8	7	32	24.3	26.5	18	1018.6	81	0	0	17.1	13.5	20.6	32.4
2004	8	8	32	25.6	26.5	22	1017.7	78	0	0	26.2	18.9	20.6	35.9
2004	8	9	32	25.3	27	15.6	-	73	0	0	19.2	10.9	14.8	35.9
2004	8	10	32	24.3	26.5	15.8	1018.5	75	0	0	18.8	11.5	22.2	32.4
2004	8	11	32	22.3	25	15.3	1026.9	55	0	0	19.2	26.1	33.5	35.9
2004	8	12	32	20.1	23	11	1026.1	64	0	0	19.8	16.1	31.3	32.4
2004	8	13	32	22.4	26.5	10.8	1023	61	0	0	22	7.4	11.1	21.7
2004	8	32 Average	32	23.4714	25.8571	15.5
2004	8	14	33	22.9	25	18.5	1022	59	0	0	22	10.9	13	28.7
2004	8	15	33	24.4	26	20.5	1015.8	77	0	0	23	18.3	24.1	48.2
2004	8	16	33	25	26.4	22	1015	84	0	0	17.5	14.4	20.6	35.9
2004	8	17	33	25.3	27.2	22	1021.3	82	0	0	18.8	11.1	14.8	32.4
2004	8	18	33	25.2	29	18	1027.4	78	0	0	18.2	13	16.5	35.9
2004	8	19	33	23.3	27.2	17.6	1025.4	79	0	0	21.1	20.9	-	-
2004	8	20	33	23.2	27.5	16	1023	73	0	0	18.7	7.6	18.3	32.4
2004	8	33 Average	33	24.1857	26.9	19.2286
2004	8	21	34	-	-	-	-	-	-		-	-	-	-
2004	8	22	34	-	-	-	-	-	-		-	-	-	-
2004	8	23	34	-	-	-	-	-	-		-	-	-	-
2004	8	24	34	-	-	-	-	-	-		-	-	-	-
2004	8	25	34	-	-	-	-	-	-		-	-	-	-
2004	8	26	34	-	-	-	-	-	-		-	-	-	-
2004	8	27	34	21.7	26	17	-	81	0	0	20.6	15.7	20.6	-
2004	8	34 Average	34	21.7	26	17
2004	8	28	35	-	-	-	-	-	-		-	-	-	-
2004	8	29	35	24.6	26	15.6	1022	71	0	0	23.5	15.7	20.6	-
2004	8	30	35	25.1	27	16	1022	73	0	0	17.9	12.8	18.3	32.4
2004	8	31	35	24.8	27	15.9	1019.4	71	0	0	21.2	9.3	13	35.9
2004	9	1	35	24.6	27	17.5	1016	74	0	0	18.8	10.4	14.8	35.9
2004	9	2	35	25.2	27	17	-	75	0	0	17.1	19.1	27.8	35.9
2004	9	3	35	-	-	-	-	-	-		-	-	-	-
2004	8.42857	35 Average	35	24.86	26.8	16.4
2004	9	4	36	22.9	25	20	-	70	0	0	15.1	15.6	16.5	-
2004	9	5	36	24.5	27	16	-	69	0	0	18.3	9.3	13	18
2004	9	6	36	24.1	27.9	16.6	1014.2	68	0	0	20.4	12	18.3	32.4
2004	9	7	36	22.4	25.2	17.5	-	74	0	0	18.5	13.5	24.1	35.9
2004	9	8	36	21.9	25	17	-	71	0	0	15.8	8.9	11.1	-
2004	9	9	36	24.5	26.9	22	1020.3	64	0	0	19.2	15.4	20.6	-
2004	9	10	36	23.1	26.6	17.7	1022.3	72	2.03	1	19.8	9.1	16.5	-
2004	9	36 Average	36	23.3429	26.2286	18.1143
2004	9	11	37	24.8	27	22	-	71	0	0	10.9	9.3	14.8	-
2004	9	12	37	-	-	-	-	-	-		-	-	-	-
2004	9	13	37	25.5	27.6	23	-	63	0	0	18.3	14.3	18.3	-
2004	9	14	37	24.3	27.5	16.8	-	71	0	0	15.4	9.4	16.5	-
2004	9	15	37	25	27	21.6	-	62	0	0	15	10.9	14.8	-
2004	9	16	37	24.9	27.4	18	1016.8	75	0	0	19.6	11.9	16.5	-
2004	9	17	37	26.4	28	22.5	-	81	0	0	15.8	12.2	16.5	35.9
2004	9	37 Average	37	25.15	27.4167	20.65
2004	9	18	38	26.6	28	22.5	-	79	0	0	18.8	16.1	16.5	35.9
2004	9	19	38	27	29.3	23.5	1012.5	78	0	0	15.6	17.2	24.1	32.4
2004	9	20	38	22.7	25	20.4	1023.2	77	0.51	1	16.7	28.2	35.2	-
2004	9	21	38	23.8	26.4	16.2	1024.8	62	0	0	19.6	20	33.5	-
2004	9	22	38	23.7	27	16.2	-	68	0	0	13	12	18.3	-
2004	9	23	38	25.9	27	23	-	59	0	0	14.3	10.9	13	-
2004	9	24	38	24.8	27.8	21.5	-	60	0	0	15.3	11.3	14.8	-
2004	9	38 Average	38	24.9286	27.2143	20.4714
2004	9	25	39	26.3	28	23.4	-	67	0	0	15.1	15.4	20.6	-
2004	9	26	39	25.3	28.5	23	-	81	0	0	18.2	18.5	22.2	-
2004	9	27	39	24	28	21.8	1019.8	67	0	0	17.7	22.4	27.8	-
2004	9	28	39	24.4	26	21	-	60	0	0	17.5	22.2	25.9	-
2004	9	29	39	22.2	26.2	14	1019.8	61	0	0	17.9	18	24.1	-
2004	9	30	39	23.1	27	15.5	1021.2	60	0	0	19.2	18.1	22.2	-
2004	10	1	39	25.2	27.5	22	-	56	0	0	13.4	13.7	16.5	-
2004	9.14286	39 Average	39	24.3571	27.3143	20.1
2004	10	2	40	25.3	27	19.8	1023.5	59	0	0	21.7	18.5	22.2	35.9
2004	10	3	40	25.2	27.4	22	-	58	0	0	13.5	11.7	14.8	-
2004	10	4	40	24.8	27	21.6	-	65	0	0	15.4	14.3	18.3	-
2004	10	5	40	26.1	27.8	22.4	-	68	0	0	15.9	13.3	20.6	-
2004	10	6	40	26.8	29.2	24.7	-	79	0	0	14	14.4	16.5	-
2004	10	7	40	27.8	29	21.4	-	76	0	0	17.9	16.1	22.2	32.4
2004	10	8	40	28.5	30	26	-	77	0	0	13	15	20.6	-
2004	10	40 Average	40	26.3571	28.2	22.5571
2004	10	9	41	24.3	28.3	20.6	-	72	0	0	14.8	18	25.9	-
2004	10	10	41	21.1	21.4	21	-	94	3.05	1	12.9	20.4	24.1	-
2004	10	11	41	21.7	22	20	-	96	11.94	1	6.8	10.2	11.1	-
2004	10	12	41	24.4	25	24	-	73	0	0	14	17.4	20.6	-
2004	10	13	41	25.5	27	23	-	64	0	0	13.7	16.7	20.6	-
2004	10	14	41	26.1	29	24.7	-	67	0	0	14	11.7	14.8	-
2004	10	15	41	24.1	27.4	20	1020	73	0	0	19.3	12	25.9	-
2004	10	41 Average	41	23.8857	25.7286	21.9
2004	10	16	42	26.8	28	25	-	68	0	0	22.5	10.4	14.8	-
2004	10	17	42	26.2	28.4	19.5	-	75	0	0	22.5	15.2	22.2	39.6
2004	10	18	42	27.2	29.8	23	-	81	0	0	15.9	12.4	16.5	-
2004	10	19	42	27.3	29.8	21.5	1020.7	70	0	0	22	18	20.6	39.6
2004	10	20	42	26.4	29.8	22.1	1018.2	68	0	0	20.6	19.8	24.1	35.9
2004	10	21	42	27.1	28	19.8	1014.9	66	0	0	23.8	14.4	16.5	43.2
2004	10	22	42	26.3	28	21	1016.9	70	0	0	24.6	15.6	20.6	39.6
2004	10	42 Average	42	26.7571	28.8286	21.7
2004	10	23	43	26.6	27.5	19.4	1017.5	59	0	0	29.9	17.6	24.1	35.9
2004	10	24	43	26.4	28.4	23.9	-	65	0	0	23.8	12.6	14.8	-
2004	10	25	43	26.7	28.8	23.4	1014.1	69	0	0	21.7	12.4	14.8	39.6
2004	10	26	43	27	29.1	23	1010.6	69	0	0	21.4	15.4	22.2	39.6
2004	10	27	43	24.5	26	22	1016.7	85	32	1	19	-	-	-
2004	10	28	43	26.9	28.9	22.6	1014.4	73	7.87	1	25.3	-	-	-
2004	10	29	43	28.4	29.5	23.6	1012.5	75	0	0	29.9	-	-	-
2004	10	43 Average	43	26.6429	28.3143	22.5571
2004	10	30	44	26.1	27.8	24	1016.7	75	0	0	24.9	-	-	-
2004	10	31	44	24.8	27.4	19.3	1021.8	58	8.89	1	24.9	-	-	-
2004	11	1	44	24.9	28	16	-	62	0	0	25.3	-	-	-
2004	11	2	44	26.7	27.8	17.5	1017.5	64	0	0	29.9	-	-	-
2004	11	3	44	25.9	29.1	19.8	1017.6	75	0	0	29.9	-	-	-
2004	11	4	44	27	28.4	20	1017.3	71	0	0	29.9	-	-	-
2004	11	5	44	27.4	29	24	1014.9	75	0	0	29.9	-	-	-
2004	10.7143	44 Average	44	26.1143	28.2143	20.0857
2004	11	6	45	27.8	29.6	24.1	1015.8	76	0	0	29.9	-	-	-
2004	11	7	45	27.7	29.5	21.9	1013.9	74	0	0	29.9	-	-	-
2004	11	8	45	27.9	29.8	24.5	1013.6	83	0	0	29.9	-	-	-
2004	11	9	45	27.8	29.5	25.3	1013.5	80	0	0	29.9	-	-	-
2004	11	10	45	-	-	-	-	-	-		-	-	-	-
2004	11	11	45	28.7	30.9	25	1014.8	74	0	0	29.9	-	-	-
2004	11	12	45	-	-	-	-	-	-		-	-	-	-
2004	11	45 Average	45	27.98	29.86	24.16
2004	11	13	46	28	29.5	25	1016.7	70	0	0	29.9	-	-	-
2004	11	14	46	27.3	29.9	24.5	1015.3	72	0	0	29.9	-	-	-
2004	11	15	46	27.2	30	24.5	1016.2	73	0	0	29.9	-	-	-
2004	11	16	46	27.6	30.5	23.3	1016.6	74	0	0	29.9	-	-	-
2004	11	17	46	27.4	29.5	21.9	1016.1	70	0	0	29.9	-	-	-
2004	11	18	46	27.8	29.5	24.1	1015.2	72	0	0	29.9	-	-	-
2004	11	19	46	28.1	30.5	24.5	1015.5	74	0	0	29.9	-	-	-
2004	11	46 Average	46	27.6286	29.9143	23.9714
2004	11	20	47	-	-	-	-	-	-		-	-	-	-
2004	11	21	47	29.7	31.4	26.1	1008.9	77	0	0	29.9	-	-	-
2004	11	22	47	26.4	28.6	24.7	1008.6	88	0.51	1	21.7	-	-	-
2004	11	23	47	27	29.5	23.4	1010.3	83	5.08	1	29	-	-	-
2004	11	24	47	25.9	27.9	23.5	1012.4	85	4.06	1	28	-	-	-
2004	11	25	47	-	-	-	-	-	-		-	-	-	-
2004	11	26	47	29	31.2	26	1014	75	0	0	29.9	-	-	-
2004	11	47 Average	47	27.6	29.72	24.74
2004	11	27	48	28.8	30	24.6	1015.1	67	0	0	29.9	-	-	-
2004	11	28	48	-	-	-	-	-	-		-	-	-	-
2004	11	29	48	29.2	31.2	23	1013.4	74	0	0	29.9	-	-	-
2004	11	30	48	30.2	32.2	25.6	1012.9	75	0	0	27.5	-	-
2004	12	1	48	29.6	31.9	27	1012.4	75	0	0	28.3	-	-	-
2004	12	2	48	30.1	32.2	27	1012.8	71	0	0	29.9	-	-	-
2004	12	3	48	29.9	31.6	27.5	1015.3	76	0	0	29.9	-	-	-
2004	11.4286	48 Average	48	29.6333	31.5167	25.7833
2004	12	4	49	-	-	-	-	-	-		-	-	-	-
2004	12	5	49	30.6	32.3	26.8	1013.8	71	0	0	29.9	-	-	-
2004	12	6	49	29.6	31.5	27.5	1013.2	78	0	0	28.8	-	-	-
2004	12	7	49	-	-	-	-	-	-		-	-	-	-
2004	12	8	49	-	-	-	-	-	-		-	-	-	-
2004	12	9	49	-	-	-	-	-	-		-	-	-	-
2004	12	10	49	27.1	32	23.1	1007.5	77	46.99	1	29.9	-	-	-
2004	12	49 Average	49	29.1	31.9333	25.8
2004	12	11	50	-	-	-	-	-	-		-	-	-	-
2004	12	12	50	-	-	-	-	-	-		-	-	-	-
2004	12	13	50	28.7	30.8	23.6	1012	77	0	0	29.9	-	-	-
2004	12	14	50	28.1	30	26.3	1008	82	0	0	25.7	-	-	-
2004	12	15	50	-	-	-	-	-	-		-	-	-	-
2004	12	16	50	-	-	-	-	-	-		-	-	-	-
2004	12	17	50	-	-	-	-	-	-		-	-	-	-
2004	12	50 Average	50	28.4	30.4	24.95
2004	12	18	51	-	-	-	-	-	-		-	-	-	-
2004	12	19	51	-	-	-	-	-	-		-	-	-	-
2004	12	20	51	27.4	30.9	21.5	1011.9	67	0	0	29.9	-	-	-
2004	12	21	51	27.1	30.2	21	1011.4	70	0	0	29.9	-	-	-
2004	12	22	51	29.4	30.2	26	1009.6	70	0	0	29.9	-	-	-
2004	12	23	51	28.6	30.7	23.5	1007.6	72	0	0	29.9	-	-	-
2004	12	24	51	-	-	-	-	-	-		-	-	-	-
2004	12	51 Average	51	28.125	30.5	23
2004	12	25	52	30.4	31.4	26.6	1010.1	70	0	0	27.5	-	-	-
2004	12	26	52	-	-	-	-	-	-		-	-	-	-
2004	12	27	52	30.4	32	27	1008.3	77	0	0	29.9	-	-	-
2004	12	28	52	30.1	31.4	26.7	1009.2	72	0	0	29.9	-	-	-
2004	12	29	52	-	-	-	-	-	-		-	-	-	-
2004	12	30	52	29.6	32.5	24.8	1008.1	74	0	0	29.9	-	-	-
2004	12	31	52	30.7	32.5	27	1009.5	73	0	0	29.9	-	-	-
2004	12	52 Average	52	30.24	31.96	26.42
2005	1	1	1	30.1	33.3	24.1	1011.7	67	0	0	29.9	-	-	-
2005	1	2	1	-	-	-	-	-	-		-	-	-	-
2005	1	3	1	-	-	-	-	-	-		-	-	-	-
2005	1	4	1	30.9	33	28.4	1009.5	70	0	0	29.9	-	-	-
2005	1	5	1	29.6	31.7	23.4	1012.7	74	0	0	29.9	-	-	-
2005	1	6	1	29.4	31.2	25.5	-	70	0	0	25.3	-	-	-
2005	1	7	1	30.6	31.3	27.2	1013.1	69	0	0	29.9	-	-	-
2005	1	1 Average	1	30.12	32.1	25.72
2005	1	8	2	-	-	-	-	-	-		-	-	-	-
2005	1	9	2	28.3	30.2	24.6	1012.4	73	0	0	25.6	-	-	-
2005	1	10	2	29.9	31.4	27.5	1015	63	0	0	29.9	-	-	-
2005	1	11	2	28	31.2	22.3	1012.9	71	0	0	29.9	-	-	-
2005	1	12	2	29.6	31.5	25.6	1013.3	69	0	0	29.9	-	-	-
2005	1	13	2	28.8	32.2	22	1014.3	65	0	0	29.9	-	-	-
2005	1	14	2	29.9	32.3	24.1	1012.3	70	0	0	29.9	-	-	-
2005	1	2 Average	2	29.0833	31.4667	24.35
2005	1	15	3	-	-	-	-	-	-		-	-	-	-
2005	1	16	3	-	-	-	-	-	-		-	-	-	-
2005	1	17	3	26.7	27.6	24.9	1016	85	10.92	1	26.2	-	-	-
2005	1	18	3	28.6	31.1	24.2	1016.3	74	2.03	1	29.9	-	-	-
2005	1	19	3	28.3	31.9	24	1015.1	72	0	0	29.9	-	-	-
2005	1	20	3	28.6	31.4	23.5	1011.2	71	0	0	29.9	-	-	-
2005	1	21	3	29.6	31.5	25	1009.3	72	0	0	29.9	-	-	-
2005	1	3 Average	3	28.36	30.7	24.32
2005	1	22	4	-	-	-	-	-	-		-	-	-	-
2005	1	23	4	-	-	-	-	-	-		-	-	-	-
2005	1	24	4	28.6	32	25	1007.6	79	5.08	1	25.1	-	-	-
2005	1	25	4	30.8	32.2	24.5	1007.8	70	0	0	29.9	-	-	-
2005	1	26	4	-	-	-	-	-	-		-	-	-	-
2005	1	27	4	29.7	33.5	23.4	1009.3	69	0	0	29.9	-	-	-
2005	1	28	4	-	-	-	-	-	-		-	-	-	-
2005	1	4 Average	4	29.7	32.5667	24.3
2005	1	29	5	31.2	33.4	29.1	1008.6	66	0	0	29.9	-	-	-
2005	1	30	5	31.5	33	24.4	1010.3	68	0	0	29.9	-	-	-
2005	1	31	5	28.8	31.4	24.1	1010.7	68	1.02	1	29.9	-	-	-
2005	2	1	5	30.1	31	24	1010.5	64	0	0	29.9	-	-	-
2005	2	2	5	29.3	32.6	22.6	1012.7	66	0.51	1	29.9	-	-	-
2005	2	3	5	27.6	31.4	22.5	1013.6	73	0	0	29.9	-	-	-
2005	2	4	5	-	-	-	-	-	-		-	-	-	-
2005	1.57143	5 Average	5	29.75	32.1333	24.45
2005	2	5	6	-	-	-	-	-	-		-	-	-	-
2005	2	6	6	27.4	30.5	22.3	1015.7	75	8.89	1	25.7	-	-	-
2005	2	7	6	27	31.4	21.8	1014.3	73	0	0	25.6	-	-	-
2005	2	8	6	28.7	31.5	23.4	1012.2	71	0	0	29.9	-	-	-
2005	2	9	6	27.8	31.8	22.6	1012	76	0	0	29.9	-	-	-
2005	2	10	6	-	-	-	-	-	-		-	-	-	-
2005	2	11	6	29.1	32	25.8	1011.3	68	0	0	29.9	-	-	-
2005	2	6 Average	6	28	31.44	23.18
2005	2	12	7	-	-	-	-	-	-		-	-	-	-
2005	2	13	7	-	-	-	-	-	-		-	-	-	-
2005	2	14	7	28.8	31.4	23.8	1012.7	70	0	0	29.9	-	-	-
2005	2	15	7	28.9	32	23	1012.9	74	0	0	29.9	-	-	-
2005	2	16	7	29.2	32.3	24.4	1014.2	72	0	0	29.9	-	-	-
2005	2	17	7	28.9	32.6	23.2	1013.2	72	0	0	29.9	-	-	-
2005	2	18	7	30.1	32.5	23.3	1011.3	68	0.51	1	29.9	-	-	-
2005	2	7 Average	7	29.18	32.16	23.54
2005	2	19	8	30.7	31.9	23.4	1011	68	0	0	29.9	-	-	-
2005	2	20	8	-	-	-	-	-	-		-	-	-	-
2005	2	21	8	29.7	32.5	25.2	1009.5	73	0	0	29.9	-	-	-
2005	2	22	8	-	-	-	-	-	-		-	-	-	-
2005	2	23	8	31.4	35.4	28.8	1007.5	64	0	0	29.9	-	-	-
2005	2	24	8	29.5	33	25	1008.1	79	3.05	1	29.9	-	-	-
2005	2	25	8	30.2	31.5	25.1	1008.1	77	3.05	1	27.5	-	-	-
2005	2	8 Average	8	30.3	32.86	25.5
2005	2	26	9	27.9	29.6	24.9	1011.5	83	0	0	19.5	-	-	-
2005	2	27	9	28.4	31.4	24.6	1013.2	77	7.87	1	28	-	-	-
2005	2	28	9	28.5	32.5	23	1011.9	74	0	0	29.9	-	-	-
2005	3	1	9	29.8	32.7	24.4	1011.9	67	0.25	1	29.9	-	-	-
2005	3	2	9	28.7	32.4	22.4	1013.1	66	0	0	29.9	-	-	-
2005	3	3	9	28.7	31.7	22.9	1014.5	64	0	0	29.9	-	-	-
2005	3	4	9	29.3	30.9	21.6	1015.2	60	0	0	29.9	-	-	-
2005	2.57143	9 Average	9	28.7571	31.6	23.4
2005	3	5	10	-	-	-	-	-	-		-	-	-	-
2005	3	6	10	-	-	-	-	-	-		-	-	-	-
2005	3	7	10	29.9	31.8	26	1007.2	76	0	0	29.9	-	-	-
2005	3	8	10	30.7	33.3	27.8	1007.4	80	0	0	29.9	-	-	-
2005	3	9	10	30.6	33.2	28.6	1009.9	85	0	0	28.3	-	-	-
2005	3	10	10	30.8	32.3	27.3	1011.6	80	0	0	29.9	-	-	-
2005	3	11	10	27.7	30.1	27	1015.3	84	0	0	21.7	-	-	-
2005	3	10 Average	10	29.94	32.14	27.34
2005	3	12	11	-	-	-	-	-	-		-	-	-	-
2005	3	13	11	28.1	30	20.5	-	61	9.91	1	29.9	-	-	-
2005	3	14	11	28.8	30.6	26.8	1014.8	64	0	0	29.9	-	-	-
2005	3	15	11	27.7	31	21.9	1014.4	68	0	0	29.9	-	-	-
2005	3	16	11	24.8	28.6	19	1015.4	81	4.06	1	19.2	-	-	-
2005	3	17	11	25.9	28.4	22.9	1014.8	85	18.03	1	14	-	-	-
2005	3	18	11	26.3	28.5	23.1	1016.1	84	7.87	1	25.3	-	-	-
2005	3	11 Average	11	26.9333	29.5167	22.3667
2005	3	19	12	27.8	30	22.3	1016.1	79	6.1	1	29.9	-	-	-
2005	3	20	12	27.3	30.3	23	1014.6	71	4.06	1	29.9	-	-	-
2005	3	21	12	28.1	29.7	21.1	1012.9	70	0	0	29.9	-	-	-
2005	3	22	12	27.8	30.2	22.2	1013.6	69	0	0	29.9	-	-	-
2005	3	23	12	25.6	29	22	1013.5	86	4.06	1	17.2	-	-	-
2005	3	24	12	-	-	-	-	-	-		-	-	-	-
2005	3	25	12	-	-	-	-	-	-		-	-	-	-
2005	3	12 Average	12	27.32	29.84	22.12
2005	3	26	13	-	-	-	-	-	-		-	-	-	-
2005	3	27	13	28.3	30.7	22.2	1010	75	0	0	29.9	-	-	-
2005	3	28	13	-	-	-	-	-	-		-	-	-	-
2005	3	29	13	27.4	29.7	25	1014.8	80	0	0	19.3	-	-	-
2005	3	30	13	28.4	30.8	20.8	1014.5	68	0	0	23	-	-	-
2005	3	31	13	27.2	30	22.9	1014.5	75	0	0	22	-
2005	4	1	13	28.2	30	25.3	-	68	0	0	19.3	-	-	-
2005	3.14286	13 Average	13	27.9	30.24	23.24
2005	4	2	14	27.7	30	22	1014.6	73	0	0	23.8	-	-	-
2005	4	3	14	28.3	30.6	23.3	1017.5	74	0	0	24.6	-	-	-
2005	4	4	14	26.1	28.4	23.7	1016.7	88	3.05	1	20.4	-	-	-
2005	4	5	14	26.3	30.2	21	1019	70	0	0	20.6	-	-	-
2005	4	6	14	24.3	29.9	22	-	74	0	0	18.8	-	-	-
2005	4	7	14	24	29	20	-	81	0	0	19	-	-	-
2005	4	8	14	26.3	29.4	20.6	1018.1	67	0	0	19.2	-	-	-
2005	4	14 Average	14	26.1429	29.6429	21.8
2005	4	9	15	25.4	28.3	19	1017.2	72	3.05	1	21.6	-	-	-
2005	4	10	15	26.6	29	19.6	1015.8	63	4.06	1	20.6	-	-	-
2005	4	11	15	25.9	30	18.5	1014.6	72	0	0	20.6	-	-	-
2005	4	12	15	26.8	29.6	20	-	68	0	0	20.6	-	-	-
2005	4	13	15	26.1	30	19.8	1014.8	80	0	0	22.2	0	-	35.9
2005	4	14	15	26.7	30.9	21.4	1019.3	75	0	0	19.2	-	-	-
2005	4	15	15	26.1	29.6	20.1	1019.5	73	0	0	20.6	-	-	-
2005	4	15 Average	15	26.2286	29.6286	19.7714
2005	4	16	16	23.9	29.8	19	1016.9	78	0	0	26.9	-	-	-
2005	4	17	16	26.1	29	21.1	1014.8	75	0	0	23.8	-	-	-
2005	4	18	16	27.7	29.6	25	1015.7	68	0	0	22	-	-	-
2005	4	19	16	26.6	28	24	1015.8	62	0	0	20.6	-	-	-
2005	4	20	16	25.3	28	18.9	1014.7	69	0	0	20.4	-	-	-
2005	4	21	16	-	-	-	-	-	-		-	-	-	-
2005	4	22	16	26.2	29.6	20.5	1016.2	74	0	0	20.6	-	-	-
2005	4	16 Average	16	25.9667	29	21.4167
2005	4	23	17	26.9	29.7	24	1013.6	71	0	0	22.5	-	-	-
2005	4	24	17	25.4	30	19.8	1012	81	0	0	22.4	-	-	-
2005	4	25	17	27.6	32	22	1011.6	83	0	0	17.5	-	-	-
2005	4	26	17	25.2	29	20.4	-	81	0	0	18.8	-	-	-
2005	4	27	17	24.4	28	20.3	1019.5	69	0	0	19.6	-	-	-
2005	4	28	17	24.9	28	18	-	63	0	0	16.9	-	-	-
2005	4	29	17	25.6	28.4	17.2	1020.4	59	0	0	20.6	-	-	-
2005	4	17 Average	17	25.7143	29.3	20.2429
2005	4	30	18	23.2	28	16.7	1018.2	71	0	0	19.8	-
2005	5	1	18	25.4	27	21	-	66	0	0	17.5	-	-	-
2005	5	2	18	22.8	27	17.4	-	77	0	0	18.8	-	-	-
2005	5	3	18	21.7	25	17	-	77	0	0	14	-	-	-
2005	5	4	18	25.8	28	16.9	1018.1	67	0	0	23	-	-	-
2005	5	5	18	23.8	27.5	17.2	1017.6	71	0	0	19.8	0	-	35.9
2005	5	6	18	23.5	28	17	1015.6	75	0	0	17.4	20.9	-	-
2005	4.85714	18 Average	18	23.7429	27.2143	17.6
2005	5	7	19	25.6	27.1	16.6	1017.2	75	0	0	23.5	-	-	-
2005	5	8	19	24.8	28.8	19.6	1020.3	78	0	0	25.3	-	-	-
2005	5	9	19	24.7	28.5	19.4	1022.3	72	0	0	22.5	-	-	-
2005	5	10	19	23.7	28	17.6	1022.2	69	0	0	19.6	-	-	-
2005	5	11	19	26.4	28.2	22	-	72	0	0	19.3	-	-	-
2005	5	12	19	23.8	28	18	-	84	0	0	14	-	-	-
2005	5	13	19	24.6	28.4	18.5	1017.3	80	0	0	22.5	-	-	-
2005	5	19 Average	19	24.8	28.1429	18.8143
2005	5	14	20	25.8	27.6	20.7	1016.7	73	0	0	21.1	-	-	-
2005	5	15	20	25.8	28	17	-	69	0	0	20.6	-	-	-
2005	5	16	20	24.6	28	18.8	-	74	0	0	19.3	-	-	-
2005	5	17	20	26.1	28.2	23.8	-	73	0	0	22.5	-	-	-
2005	5	18	20	23.8	28	16.7	1016.1	83	0	0	16.6	0	-	32.4
2005	5	19	20	24.7	28.6	17	1017.1	78	0	0	21.7	0.9	3.5	32.4
2005	5	20	20	23.4	28	19.1	-	78	0	0	12.9	-	-	-
2005	5	20 Average	20	24.8857	28.0571	19.0143
2005	5	21	21	23.4	27.3	18.9	1021.2	73	0	0	19.3	-	-	-
2005	5	22	21	23.5	28	18.4	1019.4	73	0	0	21.1	-	-	-
2005	5	23	21	23.5	28.2	17.5	1018.3	72	0	0	19.8	-	-	-
2005	5	24	21	26	28.3	17	1017	63	0	0	19.3	-	-	-
2005	5	25	21	22.9	26.5	18.6	1020.4	69	0	0	21.7	-	-	-
2005	5	26	21	21.3	25	16.4	-	76	0	0	18.3	-	-	-
2005	5	27	21	24.3	29	17	1016.8	64	0	0	19.5	-	-	-
2005	5	21 Average	21	23.5571	27.4714	17.6857
2005	5	28	22	21.4	25.8	17	-	85	0	0	16.9	-	-	-
2005	5	29	22	25.3	27.7	20.9	1017.9	69	0	0	21.7	-	-	-
2005	5	30	22	-	-	-	-	-	-		-	-	-	-
2005	5	31	22	23.3	26	16.5	-	73	0	0	15.1	0
2005	6	1	22	22.7	26.4	16.2	1017.3	72	0	0	23.5	-	-	-
2005	6	2	22	23.5	25.6	15.4	1018.2	68	0	0	23.5	-	-	-
2005	6	3	22	-	-	-	-	-	-		-	-	-	-
2005	5.42857	22 Average	22	23.24	26.3	17.2
2005	6	4	23	24.3	27.3	17.3	-	77	0	0	19.3	5.2	20.6	32.4
2005	6	5	23	22.3	27	15.6	1015.7	79	0	0	13.5	-	-	-
2005	6	6	23	23.8	26.5	19	-	80	0	0	15.9	-	-	-
2005	6	7	23	22.7	27	15.4	1017.8	79	0	0	14.8	0	-	28.7
2005	6	8	23	24.7	27.4	15.9	1016.7	73	0	0	20.6	-	-	-
2005	6	9	23	-	-	-	-	-	-		-	-	-	-
2005	6	10	23	23.9	27	21	-	80	0	0	11.9	-	-	-
2005	6	23 Average	23	23.6167	27.0333	17.3667
2005	6	11	24	24.4	26.7	19.2	1024.4	72	4.06	1	23	-	-	-
2005	6	12	24	24.7	28.3	21.9	1020.5	63	0	0	19.6	-	-	-
2005	6	13	24	23.2	26	14.5	1016.6	63	0	0	19.3	-	-	-
2005	6	14	24	24.4	26.2	19	-	74	0	0	15.9	-	-	-
2005	6	15	24	22.3	27	15	1018.1	87	0	0	16.3	-	-	-
2005	6	16	24	24.2	27.2	16.6	1021.7	78	0	0	18.7	-	-	-
2005	6	17	24	23	25.9	15.5	1023.4	74	0	0	21.7	3.1	13	28.7
2005	6	24 Average	24	23.7429	26.7571	17.3857
2005	6	18	25	-	-	-	-	-	-		-	-	-	-
2005	6	19	25	22.2	26	16.2	1020.4	69	0	0	19.6	-	-	-
2005	6	20	25	22.2	26	15.4	-	72	0	0	17.5	-	-	-
2005	6	21	25	-	-	-	-	-	-		-	-	-	-
2005	6	22	25	25.6	27	24	-	70	0	0	18.8	-	-	-
2005	6	23	25	23	26.7	17.2	1024.4	79	1.02	1	19	-	-	-
2005	6	24	25	22.5	26	17.8	1021.6	79	0.76	1	21.7	-	-	-
2005	6	25	25	24.1	26	17.4	-	71	0	0	17.5	-	-	-
2005	6	25 Average	25	23.2667	26.2833	18
2005	6	26	26	24.9	26.7	22.8	1020.7	68	0	0	23.8	-	-	-
2005	6	27	26	-	-	-	-	-	-		-	-	-	-
2005	6	28	26	-	-	-	-	-	-		-	-	-	-
2005	6	29	26	21.7	25.6	18	1025.3	73	2.03	1	29.9	-	-	-
2005	6	30	26	-	-	-	-	-	-		-
2005	7	1	26	22.6	26.9	11.1	1022.1	62	0	0	26.9	-	-	-
2005	7	2	26	20.6	24.8	15.2	-	74	0	0	29.9	-	-	-
2005	6.28571	26 Average	26	22.45	26	16.775
2005	7	3	27	-	-	-	-	-	-		-	-	-	-
2005	7	4	27	-	-	-	-	-	-		-	-	-	-
2005	7	5	27	-	-	-	-	-	-		-	-	-	-
2005	7	6	27	19.3	23.9	14	1026.4	83	0	0	19.3	-	-	-
2005	7	7	27	22.1	25.4	16.6	1024.8	75	0	0	26.2	-	-	-
2005	7	8	27	-	-	-	-	-	-		-	-	-	-
2005	7	9	27	-	-	-	-	-	-		-	-	-	-
2005	7	27 Average	27	20.7	24.65	15.3
2005	7	10	28	-	-	-	-	-	-		-	-	-	-
2005	7	11	28	-	-	-	-	-	-		-	-	-	-
2005	7	12	28	23.6	25.9	16	1026.6	73	0	0	27.4	-	-	-
2005	7	13	28	-	-	-	-	-	-		-	-	-	-
2005	7	14	28	-	-	-	-	-	-		-	-	-	-
2005	7	15	28	-	-	-	-	-	-		-	-	-	-
2005	7	16	28	-	-	-	-	-	-		-	-	-	-
2005	7	28 Average	28	23.6	25.9	16
2005	7	17	29	19.1	24.8	15	1020.4	79	0	0	29.9	-	-	-
2005	7	18	29	21.2	25.7	17.5	1018.1	83	2.03	1	29.9	-	-	-
2005	7	19	29	-	-	-	-	-	-		-	-	-	-
2005	7	20	29	23.1	26	17	-	76	0	0	12.6	-	-	-
2005	7	21	29	22.3	26.5	18	-	85	0	0	11.1	-	-	-
2005	7	22	29	21.5	26.4	15.3	1021	82	0	0	17.9	-	-	-
2005	7	23	29	21.6	26	15.8	-	78	0	0	17.5	-	-	-
2005	7	29 Average	29	21.4667	25.9	16.4333
2005	7	24	30	23.9	26	18	-	66	0	0	15.9	-	-	-
2005	7	25	30	22.3	25	14.3	-	75	0	0	14.8	-	-	-
2005	7	26	30	-	-	-	-	-	-		-	-	-	-
2005	7	27	30	23.3	26.5	17	-	64	0	0	16.6	-	-	-
2005	7	28	30	23.8	26	20	-	64	0	0	11.3	-	-	-
2005	7	29	30	22.4	25	16.2	-	66	0	0	18.8	-	-	-
2005	7	30	30	22.8	25.2	18	-	71	0	0	18.8	-	-	-
2005	7	30 Average	30	23.0833	25.6167	17.25
2005	7	31	31	22.7	25.3	17	-	71	0	0	17.5	-	-	-
2005	8	1	31	19.8	26	14	-	80	0	0	14.3	-	-	-
2005	8	2	31	21.8	26	16	-	64	0	0	11.1	-	-	-
2005	8	3	31	23.5	27.8	20	-	70	0	0	17.2	-	-	-
2005	8	4	31	23.8	26.7	16.3	1024.1	74	0	0	19.6	-	-	-
2005	8	5	31	-	-	-	-	-	-		-	-	-	-
2005	8	6	31	23.9	26.3	15	-	65	0	0	17.5	-	-	-
2005	7.85714	31 Average	31	22.5833	26.35	16.3833
2005	8	7	32	23.3	26	21	-	76	0	0	17.5	-	-	-
2005	8	8	32	24.8	28	16.5	1018.7	68	0	0	20.6	-	-	-
2005	8	9	32	25.5	27	12.4	1018.3	75	0	0	24.6	-	-	-
2005	8	10	32	26	27	22.4	-	69	0	0	22.5	-	-	-
2005	8	11	32	26.2	27	22.4	-	69	0	0	20.4	-	-	-
2005	8	12	32	26.1	27	24.6	-	69	0	0	22.9	-	-	-
2005	8	13	32	25.5	26.4	18.6	-	70	0	0	22.2	-	-	-
2005	8	32 Average	32	25.3429	26.9143	19.7
2005	8	14	33	25.4	27.8	21.8	-	73	0	0	16.6	-	-	-
2005	8	15	33	24.3	26	16.3	-	74	0	0	14.3	-	-	-
2005	8	16	33	24.8	27.2	21.5	-	69	0	0	17.5	-	-	-
2005	8	17	33	23.5	26	17	-	72	0.76	1	16.6	-	-	-
2005	8	18	33	25.7	27	24	-	70	0	0	12.7	-	-	-
2005	8	19	33	24.4	27.8	20.9	-	84	0	0	16.6	-	-	-
2005	8	20	33	23.6	26.7	18	-	80	0	0	19.2	-	-	-
2005	8	33 Average	33	24.5286	26.9286	19.9286
2005	8	21	34	23.9	24.8	22	-	82	0	0	22.5	-	-	-
2005	8	22	34	23.9	25.3	17.5	-	66	0	0	22.5	-	-	-
2005	8	23	34	25.6	28	23.7	-	62	0	0	14.3	-	-	-
2005	8	24	34	25.2	31	22	-	72	0	0	15.3	-	-	-
2005	8	25	34	26.2	27	25	-	65	0	0	15.9	-	-	-
2005	8	26	34	24.6	27.1	21.2	-	76	0	0	17.5	-	-	-
2005	8	27	34	25.5	27	23.2	-	80	0	0	18.2	-	-	-
2005	8	34 Average	34	24.9857	27.1714	22.0857
2005	8	28	35	24.8	26.2	23.2	-	78	0	0	17.5	-	-	-
2005	8	29	35	24.2	27.3	19.6	1024.2	81	0	0	23.8	-	-	-
2005	8	30	35	25.5	27.3	23.4	-	73	0	0	18.3	-	-	-
2005	8	31	35	24.7	28.3	19.8	-	77	0	0	17.1	-
2005	9	1	35	25.4	28	20	-	75	0	0	18.3	-	-	-
2005	9	2	35	27.3	28	26	-	70	0	0	13.7	-	-	-
2005	9	3	35	-	-	-	-	-	-		-	-	-	-
2005	8.42857	35 Average	35	25.3167	27.5167	22
2005	9	4	36	25.7	28.2	22	-	75	0	0	17.2	-	-	-
2005	9	5	36	26.8	28.8	22.7	1014.1	76	0	0	19.6	-	-	-
2005	9	6	36	26.7	28	22.9	-	73	0	0	19.6	-	-	-
2005	9	7	36	26.8	28	24	-	63	0	0	10.3	-	-	-
2005	9	8	36	25.8	28.2	23	-	70	0	0	16.9	-	-	-
2005	9	9	36	25.6	29	20	-	72	0	0	14	-	-	-
2005	9	10	36	26.1	28	23.4	-	67	0	0	17.5	-	-	-
2005	9	36 Average	36	26.2143	28.3143	22.5714
2005	9	11	37	24.2	27.1	17.7	1019.9	74	0	0	18.8	-	-	-
2005	9	12	37	24.9	28	19	-	78	0	0	15.8	-	-	-
2005	9	13	37	25.6	29.3	19.7	1020.5	72	0	0	19.2	-	-	-
2005	9	14	37	25.1	26	20.2	-	60	1.02	1	13	-	-	-
2005	9	15	37	21.9	25.5	18	-	74	0	0	16.6	-	-	-
2005	9	16	37	23.7	26	18.7	-	66	0	0	13.2	-	-	-
2005	9	17	37	24.7	26	19.9	-	63	0	0	14.2	-	-	-
2005	9	37 Average	37	24.3	26.8429	19.0286
2005	9	18	38	24.6	27.4	18	-	67	0	0	12.2	-	-	-
2005	9	19	38	23.8	27.2	16.8	1022.3	71	0	0	18.7	-	-	-
2005	9	20	38	25.5	27.3	19.5	1017	69	0	0	26.9	-	-	-
2005	9	21	38	25.9	28.7	24	-	72	0	0	19.2	-	-	-
2005	9	22	38	26.6	29	23.4	-	82	0	0	15.9	-	-	-
2005	9	23	38	26.9	28.4	24	-	80	0	0	22.5	-	-	-
2005	9	24	38	24.4	29.3	20.3	1015.7	86	0	0	23.8	-	-	-
2005	9	38 Average	38	25.3857	28.1857	20.8571
2005	9	25	39	27.1	29	24	-	79	0	0	18.3	-	-	-
2005	9	26	39	27.1	29	24.6	-	77	0	0	15	-	-	-
2005	9	27	39	27	30	25	-	78	0	0	18.2	-	-	-
2005	9	28	39	27.2	29.4	24.7	1015.5	73	99.06	1	23.8	-	-	-
2005	9	29	39	23.7	26	19	-	57	0	0	16.6	-	-	-
2005	9	30	39	20.8	25.2	15	-	70	0	0	22.5	-	-	-
2005	10	1	39	23.4	26.6	17	1016.8	75	0	0	25.9	-	-	-
2005	9.14286	39 Average	39	25.1857	27.8857	21.3286
2005	10	2	40	26.2	29	22.5	1014.4	76	0	0	21.4	-	-	-
2005	10	3	40	26.9	28.4	22.8	1015.2	78	0	0	20.6	-	-	-
2005	10	4	40	27.1	28	22.9	-	77	0	0	22.5	-	-	-
2005	10	5	40	26.8	29.3	21.4	1015.2	80	0	0	20.6	-	-	-
2005	10	6	40	26.5	29.5	23	1020.9	78	0	0	25.3	-	-	-
2005	10	7	40	26.2	29	24.4	1021.2	72	0	0	23	-	-	-
2005	10	8	40	26.8	28.7	23.3	1019.9	71	0	0	18.8	-	-	-
2005	10	40 Average	40	26.6429	28.8429	22.9
2005	10	9	41	-	-	-	-	-	-		-	-	-	-
2005	10	10	41	27	29.2	21	1017.8	71	0	0	23.8	-	-	-
2005	10	11	41	26.3	28.6	23.8	1015.4	71	0	0	21.4	-	-	-
2005	10	12	41	26	29	24	1012.9	77	0	0	26.2	-	-	-
2005	10	13	41	28.2	29.9	25.4	-	69	0	0	20.6	-	-	-
2005	10	14	41	27.6	30.2	21.3	1020.2	66	0	0	24.6	-	-	-
2005	10	15	41	26.2	28.7	22.7	1019.4	71	0	0	26.2	-	-	-
2005	10	41 Average	41	26.8833	29.2667	23.0333
2005	10	16	42	26.6	29.5	22.8	1018.5	71	0	0	27.4	-	-	-
[truncated: 2,011 more rows]

## Sheet: Inhambane
Year	Month	Day	week number	Mean temp	Max temp	Min temp	SLP	H	Rain	Rain days In	VV	V	VM	Vg	RA	SN	TS	FG
2002	1	1	1	-	-	-	-	-	-		-	-	-	-	-	-	-	-
2003	1	1	1	28.3	29	21	-	70	0.25	1	14.6	16.1	22.2	35.9	o
2006	1	1	1	28.8	31.6	23.9	1014.6	71	0	0	26.9	8.3	18.3	25.2
2007	1	1	1	24.2	27	23	-	76	7.87	1	-	-	-	-	o
2008	1	1	1	28.1	30.5	23.6	1010.1	83	17.02	1	18.8	9.8	11.1	25.2	o		o
2009	1	1	1	26.3	29	22.3	1009.5	86	28.96	1	11.7	7.2	13	-	o
2010	1	1	1	28.4	33.1	23.8	1010.9	71	0	0	29.9	8.3	14.8	-
2011	1	1	1	-	-	-	-	-	-	-	-	-	-	-	-	-	-
2002	1	2	1	-	-	-	-	-	-		-	-	-	-	-	-	-	-
2003	1	2	1	31.2	32	29.9	-	56	0	0	15.9	15.6	18.3	-
2006	1	2	1	28.6	32.5	27	1013.4	77	0	0	22.5	3.9	18.3	-
2007	1	2	1	26.7	28.5	20.6	1016.3	64	0	0	21.2	-	-	-
2008	1	2	1	29.1	32.4	24.2	1009.5	77	0	0	19	9.6	22.2	-
2009	1	2	1	26	29.8	-	-	84	0	0	17.5	18.5	20.6	-	o
2010	1	2	1	29.6	33	22.6	1010.9	63	0	0	21.4	13.5	27.8	-
2011	1	2	1	30.6	31.1	22.9	1011.6	65	0	29.9	-	-	-
2002	1	3	1	29	30	28	-	70	0	0	20.6	21.3	24.1	-
2003	1	3	1	31.3	32	30.4	-	65	0	0	22.5	18.1	20.6	-
2006	1	3	1	28.6	32.5	24.8	1010.7	73	0	0	20	10.6	20.6	28.7	o
2007	1	3	1	26.6	29.5	24	1012.3	87	4.06	1	12.1	-	-	-	o
2008	1	3	1	29.3	33	24.5	1007.1	76	0	0	16.7	9.4	16.5	43.2	o
2009	1	3	1	26.2	28.8	22	1010	86	21.08	1	14.6	16.3	25.9	-	o
2010	1	3	1	29.1	32.2	23.6	1011	68	0	0	20.6	12.2	20.6	-
2011	1	3	1	29.7	32.9	21.9	1012.5	67	0	29.9	12	18.3	-
2002	1	4	1	29.1	30	23.2	-	59	0	0	20.6	17.8	27.8	-
2003	1	4	1	31.5	33	22.8	-	65	0	0	18.8	12	18.3	35.9
2006	1	4	1	25.4	28.2	22	1006.5	89	20.07	1	11.7	20	25.9	32.4	o
2007	1	4	1	27.7	30.4	24	1011.8	82	0.76	1	16.7	-	-	-	o
2008	1	4	1	28.9	32.4	24	1009.4	66	0	0	18	13.9	18.3	39.6
2009	1	4	1	28.6	30	22.3	1009.3	75	8.89	1	18.3	13.3	22.2	-
2010	1	4	1	29.6	32.7	24.4	1010.9	72	0.51	1	18.5	12.8	20.6	-	o
2011	1	4	1	28	31.8	22.5	1013.6	73	0.25	24.9	15.2	25.9	-	o
2002	1	5	1	29.2	29.8	23.2	-	58	0	0	22.5	16.3	22.2	25.2
2003	1	5	1	27.9	29.9	22.3	-	73	4.06	1	22.5	16.3	24.1	39.6	o
2006	1	5	1	25.2	28.1	22.9	1004.8	95	35.05	1	9.8	21.9	29.4	-	o
2007	1	5	1	28.1	31.5	24.4	1012.2	79	0.76	1	16.1	-	-	-	o
2008	1	5	1	28.8	32	23.4	1010.1	69	0	0	21.4	9.6	14.8	43.2
2009	1	5	1	28.3	31.2	23.8	1010.2	78	0.25	1	19.8	11.5	28.7	-
2010	1	5	1	29.3	32.5	23.5	1013.2	56	0	0	20.6	21.9	37	-
2011	1	5	1	29.4	31.6	25	1009	66	0	23.8	13.7	-	-	o
2002	1	6	1	30	30.8	29	-	55	0	0	20.6	13	14.8	-
2003	1	6	1	28.4	29.8	20.6	1014.8	70	6.1	1	20.6	14.8	18.3	-	o
2006	1	6	1	26.1	27.7	23.5	1007.2	93	121.92	1	12.2	14.4	25.9	-	o		o
2007	1	6	1	29.5	31.9	24.4	1010.2	75	3.05	1	20	-	-	-
2008	1	6	1	27.5	31.4	24	1010.5	71	0	0	21.4	10.4	20.6	39.6
2009	1	6	1	28.9	31.8	23.5	1009.5	78	0	0	19.3	9.3	14.8	-
2010	1	6	1	-	-	-	-	-	-		-	-	-	-	-	-	-	-
2011	1	6	1	24.1	25.1	19.5	1006.7	90	21.08	10.6	6.7	14.8	-	o
2002	1	7	1	-	-	-	-	-	-		-	-	-	-	-	-	-	-
2003	1	7	1	28.1	31.3	22.1	1013.6	78	0	0	19.6	15.9	27.8	-	o
2006	1	7	1	27.8	30.4	23	1008.3	86	5.08	1	23.8	18.1	29.4	-
2007	1	7	1	29.4	32.8	24.8	1006.8	79	0	0	20	-	-	-
2008	1	7	1	29.2	31	27	1007	68	0	0	18	14.6	20.6	-
2009	1	7	1	29.3	31.9	24.5	1009.5	81	2.03	1	16.4	12.8	18.3	-	o
2010	1	7	1	28.7	32.2	21.4	1012.2	59	0	0	22.2	14.8	31.3	-
2011	1	7	1	27.3	30	19.6	1005.3	78	24.89	26.7	9.3	22.2	-	o
2002	1	8	2	29.6	32	24.2	1014.3	69	0	0	19.6	17	25.9	-
2003	1	8	2	27.3	30.1	20.8	-	81	7.11	1	15.6	7.8	16.5	28.7	o
2006	1	8	2	28.2	30.6	25.5	1007	87	0	0	20	17.4	29.4	35.9
2007	1	8	2	27.3	30	23.9	1008.5	80	2.03	1	15.8	-	-	-	o		o
2008	1	8	2	26.2	31.4	22.6	1008.9	87	1.02	1	11.3	4.8	14.8	39.6	o		o
2009	1	8	2	30.2	32	26.3	1011.3	76	1.02	1	20	13.9	20.6	-
2010	1	8	2	28.4	32.4	21.7	1011	63	0	0	28.3	11.1	22.2	-
2011	1	8	2	26.9	29.9	21	1004.6	80	0.76	26.1	4.8	14.8	-	o
2002	1	9	2	29.7	31.6	24.2	-	60	0	0	22.5	5.2	7.6	43.2
2003	1	9	2	32	34	22	1009.2	62	2.03	1	22	13.9	22.2	25.2
2006	1	9	2	29.3	31.2	25.4	1009	83	0	0	21.7	6.9	18.3	32.4	o		o
2007	1	9	2	27	30.1	22.4	1012.3	61	2.03	1	17.5	-	-	-
2008	1	9	2	24.3	27.2	21.4	1014.1	90	38.1	1	10.3	14.4	24.1	-	o
2009	1	9	2	29.7	32	25.3	1011.6	73	0	0	17.7	12.2	16.5	-
2010	1	9	2	29.6	31.4	26.5	-	55	0	0	17.5	23	37	-
2011	1	9	2	-	-	-	-	-	-	-	-	-	-	-	-	-	-
2002	1	10	2	-	-	-	-	-	-		-	-	-	-	-	-	-	-
2003	1	10	2	23.9	24	20.4	1013.8	93	55.12	1	7.2	18	22.2	39.6	o
2006	1	10	2	28.1	30	24.3	-	81	8.89	1	18.5	11.7	25.9	-	o
2007	1	10	2	27.6	31.4	21.9	1014.3	67	0	0	17.2	-	-	-
2008	1	10	2	26.6	28.6	22	1015.8	69	39.12	1	19	17.2	20.6	-
2009	1	10	2	30.1	33	24.4	1009	67	0	0	19.8	9.8	16.5	-
2010	1	10	2	29.6	31.5	20.8	1013.1	55	0	0	22	18.1	27.8	-
2011	1	10	2	28	31.8	23.8	1006.7	88	1.02	27.5	7.4	16.5	-			o
2002	1	11	2	30.5	31.4	23.8	-	60	0	0	22.5	9.3	13	43.2
2003	1	11	2	-	-	-	-	-	-		-	-	-	-	-	-	-	-
2006	1	11	2	-	-	-	-	-	-		-	-	-	-	-	-	-	-
2007	1	11	2	26.2	29	22.6	1013.1	76	4.06	1	14.5	-	-	-	o
2008	1	11	2	27	30	21.5	1014.5	70	0	0	19	9.8	14.8	28.7
2009	1	11	2	29	33	24.7	1009	71	0	0	21.6	9.4	18.3	-
2010	1	11	2	29.1	31	22.2	1011.5	57	0	0	29.9	9.3	14.8	-
2011	1	11	2	25.3	27.2	21	1009.5	89	22.1	18	7.4	11.1	-	o		o
2002	1	12	2	29.9	31	23.6	-	69	0	0	18.8	17	22.2	39.6
2003	1	12	2	28.4	30	19.7	1013	54	0.51	1	23.8	16.3	18.3	-
2006	1	12	2	29.9	30.5	29	-	73	0.51	1	25.3	12.6	20.6	-
2007	1	12	2	28	31	21.8	1011.1	70	0	0	19	-	-	-
2008	1	12	2	27.3	31	22.5	1012.2	76	0	0	18.5	9.3	18.3	39.6
2009	1	12	2	29.3	33.2	24.5	1009	73	0	0	18.8	5.7	14.8	-
2010	1	12	2	-	-	-	-	-	-		-	-	-	-	-	-	-	-
2011	1	12	2	26.4	28.2	22.1	1009.7	89	23.11	18.5	9.4	25.9	-	o		o
2002	1	13	2	30.2	33	24.8	-	74	0	0	25.3	10	18.3	43.2
2003	1	13	2	28.7	30.6	18.6	1010.6	60	0	0	19.6	13.1	20.6	43.2
2006	1	13	2	30.9	32	26.1	-	68	0	0	19.3	12.2	16.5	32.4
2007	1	13	2	28.6	32	23.5	1010.6	70	2.03	1	19.3	-	-	-	o
2008	1	13	2	29.1	32	23.6	1011.3	74	0	0	18.3	9.4	16.5	28.7
2009	1	13	2	29.1	33.6	25	1009	77	1.02	1	16.7	7.4	13	-
2010	1	13	2	29.8	32	22.4	1013.7	56	0.51	1	22.7	18.5	35.2	-
2011	1	13	2	-	-	-	-	-	-	-	-	-	-	-	-	-	-
2002	1	14	2	-	-	-	-	-	-		-	-	-	-	-	-	-	-
2003	1	14	2	29.9	30.4	29.2	-	65	0	0	22.5	14.1	16.5	-
2006	1	14	2	-	-	-	-	-	-		-	-	-	-	-	-	-	-
2007	1	14	2	28.7	32.6	23.1	1010	71	0	0	18.3	-	-	-
2008	1	14	2	28.7	33.4	25.5	1012.2	77	0	0	23.2	11.9	22.2	43.2
2009	1	14	2	29	33	24.5	1008.7	77	0	0	16.4	3.5	18.3	-	o		o
2010	1	14	2	29.3	32	22.5	1012.9	63	0	0	20.6	16.9	27.8	-
2011	1	14	2	27.9	31.7	27.4	1007	83	1.02	29.9	2.8	11.1	-	o		o
2002	1	15	3	-	-	-	-	-	-		-	-	-	-	-	-	-	-
2003	1	15	3	29.9	30.8	20.5	-	64	0	0	22.5	14.4	18.3	43.2
2006	1	15	3	-	-	-	-	-	-		-	-	-	-	-	-	-	-
2007	1	15	3	30.1	32.5	25.6	1007.7	74	0	0	20	-	-	-
2008	1	15	3	28.7	32.3	23	1010.6	72	0	0	19.3	6.9	18.3	39.6
2009	1	15	3	29.4	33.5	26	-	75	2.03	1	19	5.6	13	-	o
2010	1	15	3	29.5	32.5	22.7	1011.5	65	0	0	22.2	12.2	33.5	-	o
2011	1	15	3	-	-	-	-	-	-	-	-	-	-	-	-	-	-
2002	1	16	3	30	31	23.4	-	69	0	0	25.3	17	18.3	25.2
2003	1	16	3	29.5	30.7	22.8	1010.5	67	0	0	20.6	21.1	22.2	44.3
2006	1	16	3	-	-	-	-	-	-		-	-	-	-	-	-	-	-
2007	1	16	3	29.2	32	26.4	-	81	0	0	25.3	-	-	-
2008	1	16	3	29.6	32.6	24.6	1008.7	73	0	0	19.8	14.3	22.2	35.9
2009	1	16	3	29.6	33.5	24.3	1009.2	76	11.94	1	18.5	9.1	18.3	-
2010	1	16	3	30	33.2	22.7	1013.1	62	0	0	22.7	8.7	20.6	-
2011	1	16	3	-	-	-	-	-	-	-	-	-	-	-	-	-	-
2002	1	17	3	29.6	30.4	23.8	-	65	0	0	20.6	17.6	24.1	43.2
2003	1	17	3	29.3	31	22.5	1012.7	61	0	0	20.6	12.4	22.2	43.2
2006	1	17	3	28.9	31	24.4	1012.7	74	2.03	1	23	14.3	22.2	32.4
2007	1	17	3	29.1	33	25.1	1010.2	77	0	0	22.7	-	-	-			o
2008	1	17	3	28.6	31.8	25.9	1012.2	79	0	0	18.3	7.2	18.3	39.6
2009	1	17	3	30.6	33.5	25.1	1007.9	73	0	0	20	6.1	13	-
2010	1	17	3	-	-	-	-	-	-		-	-	-	-	-	-	-	-
2011	1	17	3	29.1	30	26.8	1009	82	0.25	20.8	4.8	13	-	o		o
2002	1	18	3	29.6	31	24	1008.3	68	0	0	21.6	18.9	22.2	39.6
2003	1	18	3	29.9	31	21.5	-	67	0	0	25.3	16.1	18.3	35.9
2006	1	18	3	29.6	32.4	25.8	-	73	0	0	20.6	7.4	22.2	-			o
2007	1	18	3	29.5	33.6	24	1009.4	70	0	0	17.9	-	-	-
2008	1	18	3	25.7	29	23.3	1012.8	83	3.05	1	12.4	12.2	22.2	-	o
2009	1	18	3	-	-	-	-	-	-		-	-	-	-	-	-	-	-
2010	1	18	3	29.4	31.4	22.4	1015.7	56	0.76	1	19.8	14.8	27.8	-
2011	1	18	3	31	32.4	23.3	1008.8	69	10.92	29.9	16.1	22.2	-
2002	1	19	3	-	-	-	-	-	-		-	-	-	-	-	-	-	-
2003	1	19	3	31.1	33	24.6	1012.9	63	0	0	20.6	14.1	16.5	35.9
2006	1	19	3	-	-	-	-	-	-		-	-	-	-	-	-	-	-
2007	1	19	3	30.3	34	24.5	1008.8	70	0	0	19.3	-	-	-
2008	1	19	3	27.3	30	23.5	1012.3	72	6.1	1	17.7	13.9	18.3	-	o
2009	1	19	3	30.9	34	25	1008.8	65	0	0	23.8	18.9	25.9	-
2010	1	19	3	30.1	32	22.8	1012	59	0	0	20.6	15	31.3	-
2011	1	19	3	28.2	32.4	21.8	1007.7	81	10.92	23	5	16.5	-	o		o
2002	1	20	3	-	-	-	-	-	-		-	-	-	-	-	-	-	-
2003	1	20	3	30.9	32	29	-	63	0	0	19.3	15.6	20.6	-
2006	1	20	3	-	-	-	-	-	-		-	-	-	-	-	-	-	-
2007	1	20	3	26.9	34.2	24	1012.7	74	4.06	1	16.4	-	-	-	o
2008	1	20	3	28.4	31.4	21.3	1011.7	66	0	0	20	7.4	14.8	-
2009	1	20	3	27.6	30	23.4	1010.7	72	2.03	1	19.2	17.2	22.2	-	o
2010	1	20	3	30.1	33	22.9	1012.9	64	0	0	20.6	9.4	18.3	-
2011	1	20	3	29	32.6	24.9	1006.3	81	0	29.9	5.2	11.1	-
2002	1	21	3	30.8	31.4	23.5	-	64	0	0	20.6	39.8	-	-
2003	1	21	3	30.9	32	21.8	1012.2	62	0	0	26.2	14.4	25.9	39.6
2006	1	21	3	29.1	32.5	28	-	61	0	0	25.3	8.9	13	-
2007	1	21	3	26.9	30.8	22.1	1014	68	0	0	17.4	-	-	-	o
2008	1	21	3	28.5	32	23.4	1011.8	72	0	0	19.5	13.3	22.2	43.2
2009	1	21	3	27.3	31.5	22.6	1009.7	66	1.02	1	23.3	12.8	22.2	-
2010	1	21	3	29.7	33.3	23	1014	60	0	0	21.6	12.6	37	-
2011	1	21	3	29.6	31.5	23.4	1008.4	77	2.03	24.8	1.9	7.6	-	o
2002	1	22	4	30.1	31.2	23.6	-	60	0	0	20.6	20	29.4	43.2
2003	1	22	4	31.5	33	22	1012.5	59	0	0	20.6	11.1	18.3	43.2
2006	1	22	4	29.7	30.5	22.1	-	62	0	0	25.3	13	16.5	21.7
2007	1	22	4	27.6	31.4	21.9	1013.7	67	0.51	1	18.2	-	-	-	o
2008	1	22	4	27.5	31.2	22.8	1010.3	66	0	0	20	12	20.6	35.9
2009	1	22	4	28.1	30.6	21.5	1011	63	0	0	18.5	9.4	14.8	-
2010	1	22	4	30.2	32.2	23.3	1011.7	59	0	0	20.6	11.9	18.3	-
2011	1	22	4	29.5	32.9	23.1	1006.6	75	0	29.9	4.1	13	-
2002	1	23	4	29.6	31.4	23.2	-	63	0	0	19.3	13	22.2	-
2003	1	23	4	30.6	32.6	22	1011.5	65	0	0	23.8	12	18.3	43.2
2006	1	23	4	30.2	31.9	23.5	1011.1	63	0	0	29.9	8.3	13	35.9
2007	1	23	4	28.1	31.7	22.4	1013.8	68	0	0	19	-	-	-
2008	1	23	4	28.8	32	24.1	1007.2	74	0	0	16.7	7.4	14.8	35.9	o
2009	1	23	4	29.3	32	23.7	1008.4	67	0	0	17.5	13.9	20.6	-
2010	1	23	4	29.9	32.3	23.3	1010.5	63	0	0	21.7	9.1	24.1	-
2011	1	23	4	29.4	32.5	23.9	1007.8	76	2.03	24	1.9	7.6	-	o		o
2002	1	24	4	30.2	32	23.8	1012	58	0	0	20.6	17	25.9	-
2003	1	24	4	31.4	33.1	21.8	1011.1	58	0	0	26.2	18.5	22.2	32.4
2006	1	24	4	-	-	-	-	-	-		-	-	-	-	-	-	-	-
2007	1	24	4	27.3	31.4	25.4	1013	80	6.1	1	15.3	-	-	-	o
2008	1	24	4	28.8	30.6	23.6	1009.4	80	16	1	27.4	14.6	20.6	-
2009	1	24	4	28.9	32.5	24.8	1010.7	71	0	0	18.8	6.3	11.1	-
2010	1	24	4	30.6	33	22.6	1008.9	61	0	0	20.6	15.9	25.9	-
2011	1	24	4	-	-	-	-	-	-	-	-	-	-	-	-	-	-
2002	1	25	4	29.4	31	23.4	-	62	0.51	1	22.5	15.9	25.9	43.2
2003	1	25	4	30.6	31	30	-	65	0	0	20.6	11.1	13	-
2006	1	25	4	29.3	33	23.5	1012.5	66	0	0	19.2	6.5	18.3	-
2007	1	25	4	26.6	29.8	23.9	1013.3	81	0	0	15.1	-	-	-	o
2008	1	25	4	28.6	31.2	20.2	1011.8	74	0	0	25.3	17.6	24.1	-
2009	1	25	4	29.6	32.7	23.6	1011.5	67	0	0	20.6	9.4	22.2	-
2010	1	25	4	28.8	32.5	25	1008.5	79	7.11	1	16.1	14.4	22.2	-	o		o
2011	1	25	4	28.4	32	21.4	1005.7	77	5.08	29.9	3.7	9.4	-
2002	1	26	4	27.2	29	23.5	-	76	11.94	1	20.3	21.1	29.4	35.9	o
2003	1	26	4	30.1	32.8	23.7	1009	73	3.05	1	19.5	11.5	14.8	28.7	o		o
2006	1	26	4	29.7	34	25	1013.2	69	0	0	18.2	7.2	16.5	-
2007	1	26	4	27.8	30.8	23	1012.9	73	0	0	18	-	-	-
2008	1	26	4	27.4	30.2	23.8	1011.7	75	0.51	1	16.4	17.2	24.1	-	o
2009	1	26	4	29	32	24.4	1013.9	75	0.76	1	18.8	9.6	13	-
2010	1	26	4	28.9	31	22.8	-	79	41.91	1	14.8	10.2	18.3	-	o
2011	1	26	4	-	-	-	-	-	-	-	-	-	-	-	-	-	-
2002	1	27	4	28.2	29	23	-	65	6.1	1	22.5	17.8	25.9	-
2003	1	27	4	30	31.8	22.1	-	64	8.89	1	18.8	22.2	25.9	-
2006	1	27	4	30.3	32.9	24.6	1013.7	68	0	0	29.9	9.3	14.8	43.2
2007	1	27	4	28.2	32.1	23.5	1012.4	70	0	0	19.6	-	-	-
2008	1	27	4	26	30.5	22.8	-	79	5.08	1	16.3	4.1	20.6	25.2	o
2009	1	27	4	29.7	32.6	25.4	1011.7	78	0	0	27	17.4	24.1	-
2010	1	27	4	28.4	31	22.8	-	79	25.91	1	9.2	13	20.6	-	o
2011	1	27	4	27.9	31.2	22.6	1005.8	74	10.92	28	9.6	24.1	-
2002	1	28	4	29.3	30.2	22.4	-	65	0	0	22.5	8.1	16.5	25.2
2003	1	28	4	29.3	31	28	-	61	1.02	1	22.9	15.2	18.3	-	o
2006	1	28	4	29.2	32.8	25.5	1011	69	0	0	21.6	13.5	18.3	35.9
2007	1	28	4	27.9	31.8	25.9	1014.7	75	0	0	22.4	-	-	-	o
2008	1	28	4	28.7	31.7	22.5	1007.6	66	0	0	25.3	8	18.3	28.7
2009	1	28	4	31	33	25.6	1011.9	76	2.03	1	20.6	13.5	22.2	-			o
2010	1	28	4	31.4	33	25.1	1006.1	74	2.03	1	17.7	20.7	27.8	-	o
2011	1	28	4	29.6	30.6	22.7	1010.1	58	0	29.9	18.3	18.3	-
2002	1	29	5	29	30	23.2	-	65	0	0	20.6	9.3	14.8	32.4
2003	1	29	5	26.9	28	20.9	1011.7	80	2.03	1	14.3	11.1	20.6	25.2	o
2006	1	29	5	28.8	33.4	26	1009.5	74	0	0	20	7.2	18.3	-			o
2007	1	29	5	28.7	32	24	1010.9	73	0	0	18.2	-	-	-
2008	1	29	5	28.2	31.8	23.2	1009.7	68	0	0	27.4	13.9	24.1	39.6
2009	1	29	5	-	-	-	-	-	-		-	-	-	-	-	-	-	-
2010	1	29	5	27.2	28.3	22.4	1007.5	86	38.1	1	14.5	8.5	22.2	-	o
2011	1	29	5	27.2	30.5	21	1011.5	67	0.51	26.6	13.3	18.3	-	o
2002	1	30	5	30.2	31.2	23.8	-	66	0	0	25.3	7	7.6	32.4
2003	1	30	5	-	-	-	-	-	-		-	-	-	-	-	-	-	-
2006	1	30	5	29	33.8	24.6	1009.2	73	0	0	23.8	3.3	14.8	39.6
2007	1	30	5	27.3	29	23.2	1008.3	81	0	0	17.2	-	-	-	o
2008	1	30	5	28.4	31.7	24.3	1011.4	65	0	0	18.5	15.4	22.2	-
2009	1	30	5	-	-	-	-	-	-		-	-	-	-	-	-	-	-
2010	1	30	5	27.1	28.8	21.3	1010.7	70	26.92	1	24.8	21.1	24.1	-	o
2011	1	30	5	27.6	31	25.1	1010.3	66	0	29.9	10.6	16.5	-
2002	1	31	5	30.5	32	23	-	65	0	0	22.5	9.6	16.5	35.9
2003	1	31	5	31.3	33	29	-	70	0.51	1	14.5	15.9	22.2	-
2006	1	31	5	30.6	33	27	1008.6	69	0	0	20.3	12.2	25.9	-	o
2007	1	31	5	28.9	32.6	23.8	1010.9	64	0.25	1	20.1
2008	1	31	5	28.2	30.5	22.4	1011.5	69	0.76	1	22.2	15.7	18.3	35.9	o
2009	1	31	5	-	-	-	-	-	-
2010	1	31	5	29.7	31	22.5	1010.4	60	0	0	20.6	18.9	22.2
2011	1	31	5	28.2	31.9	21.4	1011.4	67	0	27.5	10.6	22.2	-	o
2001	2	1	5	-	-	-	-	-	-		-	-	-	-	-	-	-	-
2002	2	1	5	30.5	32.4	24.8	-	66	0	0	17.1	13	20.6	32.4	o		o
2003	2	1	5	30	32	21.9	1012.4	67	2.03	1	23	8.5	16.5	-
2006	2	1	5	24.5	28.2	21.8	1011.5	92	76.96	1	10.1	11.1	18.3	28.7	o		o
2007	2	1	5	27.7	31.8	23.2	1009.9	72	0	0	16.6	-	-	-
2008	2	1	5	29.1	32	24	1011.6	65	2.03	1	18.8	11.5	20.6	21.7
2009	2	1	5	-	-	-	-	-	-		-	-	-	-	-	-	-	-
2010	2	1	5	30.4	32.3	20.5	1007.8	60	0	0	18.8	12.4	20.6	-
2011	2	1	5	27.1	31	20.8	1013.5	68	0	29.9	11.1	22.2	-
2001	2	2	5	-	-	-	-	-	-		-	-	-	-	-	-	-	-
2002	2	2	5	-	-	-	-	-	-		-	-	-	-	-	-	-	-
2003	2	2	5	30.9	32.1	30	-	66	0	0	22.5	12.2	18.3	-
2006	2	2	5	26.2	30.5	22.1	1009.8	86	38.1	1	12.7	18	25.9	-	o
2007	2	2	5	28.2	33	22.9	1012.1	67	0	0	16.9	-	-	-
2008	2	2	5	28.1	31.8	23.1	1011.9	67	0	0	29.9	14.4	22.2	43.2
2009	2	2	5	-	-	-	-	-	-		-	-	-	-	-	-	-	-
2010	2	2	5	28.9	31.2	22.1	1009.2	74	7.87	1	16.9	9.8	27.8	-	o
2011	2	2	5	28.2	31.2	20	1013.8	61	0	29.9	11.9	18.3	-
2001	2	3	5	-	-	-	-	-	-		-	-	-	-	-	-	-	-
2002	2	3	5	-	-	-	-	-	-		-	-	-	-	-	-	-	-
2003	2	3	5	30.9	32.5	21.6	1013.8	61	0	0	22	11.1	22.2	39.6
2006	2	3	5	28.2	31	24	1007.9	69	0	0	16.9	14.4	20.6	25.2
2007	2	3	5	28.2	32.5	22.6	1012	74	0	0	17.4	-	-	-	o
2008	2	3	5	28.7	32.6	22.5	1011	71	0.51	1	27.7	8.3	18.3	39.6
2009	2	3	5	-	-	-	-	-	-		-	-	-	-	-	-	-	-
2010	2	3	5	29	30.7	21.6	1009.7	64	0	0	22.5	12.4	27.8	-
2011	2	3	5	-	-	-	-	-	-	-	-	-	-	-	-	-	-
2001	2	4	5	-	-	-	-	-	-		-	-	-	-	-	-	-	-
2002	2	4	5	29.3	31	23	-	62	0	0	25.3	14.8	22.2	39.6
2003	2	4	5	-	-	-	-	-	-		-	-	-	-	-	-	-	-
2006	2	4	5	27	32.6	25	1008.6	75	0	0	16.6	5.4	13	-
2007	2	4	5	29.4	32.6	23	1009.3	65	0	0	19.3	-	-	-
2008	2	4	5	29.6	32.9	25.1	1013.9	65	0	0	25.9	14.1	20.6	39.6
2009	2	4	5	-	-	-	-	-	-		-	-	-	-	-	-	-	-
2010	2	4	5	29.4	31.8	24.1	1011.3	73	0.76	1	24.8	6.3	13	-	o		o
2011	2	4	5	27.7	30.2	20.3	1017.1	68	16	27	19.6	24.1	-	o
2001	2	5	6	-	-	-	-	-	-		-	-	-	-	-	-	-	-
2002	2	5	6	29.8	31.2	23	-	63	0	0	22.5	13.7	22.2	39.6
2003	2	5	6	31.6	32.4	30.4	-	69	0	0	22.5	15.6	18.3	-
2006	2	5	6	28.4	33	23.6	1009.3	72	0	0	16.7	4.3	14.8	43.2
2007	2	5	6	28.8	32.1	23.1	1009.9	66	0	0	19	-	-	-
2008	2	5	6	28.7	32	24	1014	69	0	0	27.4	16.7	22.2	39.6
2009	2	5	6	-	-	-	-	-	-		-	-	-	-	-	-	-	-
2010	2	5	6	29.3	31.2	26.6	1012.7	62	0	0	18	15.7	24.1	-
2011	2	5	6	28.3	29	21.6	1015.5	66	0	26.2	17.6	22.2	-	o
2001	2	6	6	28.7	31	24.7	-	76	0	0	16.7	11.5	14.8	-
2002	2	6	6	30.4	32.2	23.2	-	65	0	0	20.6	7	14.8	39.6
2003	2	6	6	29.2	31.1	24	1012.8	80	3.05	1	22.2	7	14.8	39.6	o
2006	2	6	6	28.9	32	24.3	1012.9	69	0	0	21.6	10.2	20.6	39.6
2007	2	6	6	26.6	29	23.3	-	82	0	0	20.6	-	-	-
2008	2	6	6	28.8	31.5	25.1	1013.7	70	0	0	26.2	14.3	22.2	35.9
2009	2	6	6	-	-	-	-	-	-		-	-	-	-	-	-	-	-
2010	2	6	6	29.3	31	21.5	1011.5	63	0	0	21.7	13.5	18.3	-
2011	2	6	6	27.4	31.3	20.1	1014.8	74	0.51	28	5.9	14.8	-
2001	2	7	6	29.9	31	24.5	1010.9	67	0	0	20.4	14.4	20.6	25.2
2002	2	7	6	-	-	-	-	-	-		-	-	-	-	-	-	-	-
2003	2	7	6	30.4	33	23	-	70	0	0	20.6	13.9	18.3	-
2006	2	7	6	27.4	30	23.7	1012.9	82	7.11	1	17.5	7.2	16.5	32.4	o
2007	2	7	6	29.8	33.5	23.3	1011.2	67	0	0	23	-	-	-
2008	2	7	6	29.1	32.5	24.5	1010.1	66	0.51	1	25.9	15.4	24.1	35.9
2009	2	7	6	-	-	-	-	-	-		-	-	-	-	-	-	-	-
2010	2	7	6	29.1	30.6	21.6	1013.8	57	0	0	20.6	14.3	24.1	-
2011	2	7	6	29.1	31.8	21.5	1011.9	69	0	29.9	11.5	20.6	-
2001	2	8	6	-	-	-	-	-	-		-	-	-	-	-	-	-	-
2002	2	8	6	26.4	27.2	24.1	1014.1	90	2.03	1	14.5	15.7	25.9	32.4	o		o
2003	2	8	6	-	-	-	-	-	-		-	-	-	-	-	-	-	-
2006	2	8	6	27.8	30.4	23.2	1011.9	84	0	0	15.8	12	20.6	-	o		o
2007	2	8	6	30.2	34.4	24.2	1009.6	66	0	0	18.8	-	-	-
2008	2	8	6	26.9	29	23.8	1011.4	78	0	0	18	13.7	22.2	39.6	o
2009	2	8	6	-	-	-	-	-	-		-	-	-	-	-	-	-	-
2010	2	8	6	29.9	31.8	22.3	1016.6	59	0	0	18.8	18.7	33.5	-
2011	2	8	6	28.8	31.5	20.9	1011.4	73	0	29.9	9.3	18.3	-
2001	2	9	6	-	-	-	-	-	-		-	-	-	-	-	-	-	-
2002	2	9	6	-	-	-	-	-	-		-	-	-	-	-	-	-	-
2003	2	9	6	30.4	33	23.2	-	71	0	0	22.5	12.8	20.6	39.6
2006	2	9	6	29.2	31.5	24.1	1012.3	80	17.02	1	21.4	16.9	22.2	-
2007	2	9	6	28.9	32.9	24	1007.3	73	0	0	17.9	-	-	-	o
2008	2	9	6	25.7	26	25	-	70	0	0	14.2	24.1	27.8	-	o
2009	2	9	6	28	30	23.4	1012.4	73	23.11	1	15.8	5.6	9.4	-	o
2010	2	9	6	29.9	31	22.2	1016	56	0	0	20.6	21.7	37	-
2011	2	9	6	30.1	33	21.7	1009.8	62	0	29.9	11.1	24.1	-
2001	2	10	6	-	-	-	-	-	-		-	-	-	-	-	-	-	-
2002	2	10	6	-	-	-	-	-	-		-	-	-	-	-	-	-	-
2003	2	10	6	29.3	31.8	23	1012.2	68	2.03	1	20.1	19.6	22.2	35.9	o
2006	2	10	6	29.8	32	26.1	1013.6	80	0	0	19.3	11.3	18.3	39.6
2007	2	10	6	29.1	35	23.6	1004.5	75	0	0	21.4	-	-	-
2008	2	10	6	25.2	26	24	-	72	0.51	1	16.7	17.8	25.9	-	o
2009	2	10	6	29.3	31	21.7	1013.8	63	0	0	21.7	6.9	9.4	-
2010	2	10	6	29.3	30	22.2	-	66	0.51	1	15	14.6	24.1	-	o
2011	2	10	6	29.7	32	27	1011.2	63	0	29.9	17.6	24.1	-
2001	2	11	6	-	-	-	-	-	-		-	-	-	-	-	-	-	-
2002	2	11	6	30.2	32.6	22.5	-	65	0	0	25.3	8.3	20.6	39.6
2003	2	11	6	28.1	29	27.2	-	72	0.51	1	20.1	23.7	24.1	-	o
2006	2	11	6	29.8	33	25	1014.8	74	0	0	19.5	6.3	16.5	32.4
2007	2	11	6	30.6	34.6	26	1001.7	69	0	0	18.3	-	-	-
2008	2	11	6	27.4	29.9	21	1014	62	3.05	1	19.3	14.8	22.2	-
2009	2	11	6	-	-	-	-	-	-		-	-	-	-	-	-	-	-
2010	2	11	6	29.7	31.5	22.1	1013	69	3.05	1	19.6	12.6	18.3	-
2011	2	11	6	-	-	-	-	-	-	-	-	-	-	-	-	-	-
2001	2	12	7	28.1	30	23	1012.7	79	0	0	19.8	10.4	14.8	-	o
2002	2	12	7	29.4	32.4	23.8	1011.1	66	0	0	22	7.6	14.8	39.6
2003	2	12	7	-	-	-	-	-	-		-	-	-	-	-	-	-	-
2006	2	12	7	29.1	32	25.4	1012.7	80	0	0	20.6	5	11.1	39.6
2007	2	12	7	27.8	30.9	23.8	1003.6	77	0	0	16.6	-	-	-
2008	2	12	7	26.4	31	21	1010.2	76	0	0	22	7.4	18.3	28.7
2009	2	12	7	-	-	-	-	-	-		-	-	-	-	-	-	-	-
2010	2	12	7	29.9	33	21.8	1011.2	64	0	0	21.7	10.2	22.2	-
2011	2	12	7	27.7	31.2	21	1012.1	65	0	29.9	6.7	22.2	-
2001	2	13	7	28.6	30.2	24	1010.2	80	8.89	1	24.3	3.3	11.1	-	o		o
2002	2	13	7	29.6	32	23	1011.6	63	0	0	23.2	8	18.3	35.9
2003	2	13	7	30	32.4	21.5	-	66	0.51	1	22.9	18.1	24.1	35.9	o
2006	2	13	7	30.1	33	24.5	1008.7	72	0	0	17.9	6.3	13	28.7
2007	2	13	7	28.2	32	23	1007.3	63	0	0	19.2	-	-	-
2008	2	13	7	28.8	31.5	23	1012.4	69	0	0	21.2	4.8	13	39.6			o
2009	2	13	7	-	-	-	-	-	-		-	-	-	-	-	-	-	-
2010	2	13	7	30.4	32	24	1010.4	72	0	0	20.3	21.7	35.2	-
2011	2	13	7	28.6	30.9	20.8	1012.1	62	0.76	28	17.8	24.1	-
2001	2	14	7	27.2	31	24.5	1009.4	89	16	1	19.8	8.1	18.3	25.2	o		o
2002	2	14	7	30.9	32	24	-	62	0	0	22.5	11.9	14.8	39.6
2003	2	14	7	30.2	32.2	21.5	1008.3	66	0	0	20.6	8.5	14.8	-
2006	2	14	7	29.1	33.3	24.8	1010.3	81	0	0	20	4.3	13	43.2
2007	2	14	7	27.7	32	23.3	1010.5	62	0	0	18	-	-	-
2008	2	14	7	26.2	29	22.9	1012.4	80	0	0	18.3	9.1	14.8	25.2	o		o
2009	2	14	7	-	-	-	-	-	-		-	-	-	-	-	-	-	-
2010	2	14	7	30.8	33.2	24.7	1012.6	68	0	0	19.6	13.7	27.8	-
2011	2	14	7	27.5	30.7	21.5	1011.8	72	2.03	19.6	18.9	22.2	-	o
2001	2	15	7	25.1	26.9	22.5	1013.4	92	23.88	1	15.3	8.1	14.8	21.7	o
2002	2	15	7	31.1	33	24	1010.4	66	0	0	19.3	12.2	20.6	43.2
2003	2	15	7	30.9	31.6	30	-	63	0	0	20.6	16.5	16.5	-
2006	2	15	7	30.1	33.2	24.4	1011.6	69	0	0	18.8	9.4	18.3	32.4
2007	2	15	7	26.9	30.6	22.5	1010.9	67	0	0	17.7	-	-	-
2008	2	15	7	27.1	32	22.9	1011.6	76	36.07	1	19.2	11.9	20.6	-
2009	2	15	7	-	-	-	-	-	-		-	-	-	-	-	-	-	-
2010	2	15	7	28.7	30	23.2	-	72	0	0	20.6	6.1	14.8	-
2011	2	15	7	28.7	31	21.8	1010.4	67	3.05	27.5	15.2	18.3	-
2001	2	16	7	-	-	-	-	-	-		-	-	-	-	-	-	-	-
2002	2	16	7	30.9	32.8	24	-	76	2.03	1	19.5	8.9	18.3	43.2	o
2003	2	16	7	30.3	32	23	-	66	0	0	20.6	12	16.5	39.6
2006	2	16	7	30	32.8	24.9	1012.4	70	0	0	20.6	6.3	18.3	43.2
2007	2	16	7	28.1	33	21.4	1009.2	66	0	0	18.2	-	-	-
2008	2	16	7	27.6	32	25.4	1015.5	75	0	0	16.9	17.8	22.2	-	o
2009	2	16	7	-	-	-	-	-	-		-	-	-	-	-	-	-	-
2010	2	16	7	30.6	32	23.8	1010.2	70	0	0	18.5	25.2	37	-
2011	2	16	7	28.9	31	21.2	1009	66	3.05	28	21.1	-	-
2001	2	17	7	-	-	-	-	-	-		-	-	-	-	-	-	-	-
2002	2	17	7	26.4	27	24.5	-	79	10.92	1	16.6	25.9	29.4	35.9
2003	2	17	7	30.7	32	22.1	1012	68	0	0	20.6	11.7	16.5	28.7
2006	2	17	7	29.6	33.1	25	1012.3	72	17.02	1	19	7.6	14.8	39.6	o
2007	2	17	7	28.7	32	23.5	1012.3	66	0	0	17.5	-	-	-
2008	2	17	7	28.3	32	22.8	1012.6	73	6.1	1	17.5	16.1	24.1	32.4	o
2009	2	17	7	-	-	-	-	-	-		-	-	-	-	-	-	-	-
2010	2	17	7	30.7	32	23.8	1009.9	76	0	0	20.6	24.4	33.5	-
2011	2	17	7	27.5	28.9	20.9	1009	75	9.91	20.9	18.5	22.2	-	o
2001	2	18	7	-	-	-	-	-	-		-	-	-	-	-	-	-	-
2002	2	18	7	27.8	29	23.3	-	56	0	0	18.3	21.1	25.9	-
2003	2	18	7	30.2	31.1	24.2	1014.1	70	0	0	24.3	19.3	22.2	35.9
2006	2	18	7	29.2	32.4	24.4	1012.8	70	0	0	18.3	6.7	16.5	35.9
2007	2	18	7	26.8	28.6	26	-	93	8.89	1	9.8	-	-	-	o
2008	2	18	7	28.8	32.1	24.3	1010.5	79	3.05	1	16.6	12.6	18.3	39.6	o
2009	2	18	7	-	-	-	-	-	-		-	-	-	-	-	-	-	-
2010	2	18	7	26.7	28	25	-	87	68.07	1	15.4	11.7	18.3	-	o
2011	2	18	7	26.7	31.2	20.7	1009	73	1.02	27	9.3	18.3	-	o
2001	2	19	8	28.8	30	27	-	82	0	0	10.9	28.7	35.2	-	o
2002	2	19	8	26.2	28.1	22.2	1020.7	72	1.02	1	18.3	18.9	25.9	39.6	o
2003	2	19	8	30.8	32	22.3	1010.7	66	0	0	26.2	11.9	16.5	25.2
2006	2	19	8	29.1	32	24.5	1010.6	71	0	0	19.3	7.2	14.8	43.2
2007	2	19	8	27.6	31.5	24	1010.5	85	3.05	1	16.3	-	-	-	o
2008	2	19	8	28.9	33	24.4	1009.8	77	1.02	1	16.9	15	22.2	32.4	o
2009	2	19	8	-	-	-	-	-	-		-	-	-	-	-	-	-	-
2010	2	19	8	28.9	30.1	15	-	80	0.51	1	17.9	13	37	-	o
2011	2	19	8	27.3	29.8	20.1	1008.6	69	0.51	27.5	2.4	9.4	-
2001	2	20	8	28.5	30	26	-	84	0.76	1	17.5	19.8	24.1	25.2	o
2002	2	20	8	-	-	-	-	-	-		-	-	-	-	-	-	-	-
2003	2	20	8	31.6	33	23.6	-	72	0	0	22.5	17	22.2	35.9
2006	2	20	8	29.2	32.4	23.6	1008.2	74	0	0	19.8	9.6	18.3	43.2
2007	2	20	8	-	-	-	-	-	-		-	-	-	-	-	-	-	-
2008	2	20	8	27.9	30.1	24.8	1010.3	79	0.76	1	13.5	23.5	27.8	28.7	o
2009	2	20	8	-	-	-	-	-	-		-	-	-	-	-	-	-	-
2010	2	20	8	30.1	32	23.3	1014.3	67	0	0	18.3	29.4	40.7	-	o
2011	2	20	8	-	-	-	-	-	-	-	-	-	-	-	-	-	-
2001	2	21	8	-	-	-	-	-	-		-	-	-	-	-	-	-	-
2002	2	21	8	29.3	31.4	22.6	1014.2	63	0	0	23.8	14.1	22.2	39.6
2003	2	21	8	27.6	31	21	-	83	16	1	20.6	8	11.1	35.9
2006	2	21	8	29.7	33	24.5	1010.5	66	0	0	17.5	6.3	18.3	39.6
2007	2	21	8	29.2	32	23.8	1006.5	77	0	0	16.3	31.5	37	-	o
2008	2	21	8	28.8	31	24.1	1011	69	4.06	1	20.3	21.9	29.4	-	o
2009	2	21	8	-	-	-	-	-	-		-	-	-	-	-	-	-	-
2010	2	21	8	28.4	30.6	22.7	1012.3	76	1.02	1	19.6	19.4	27.8	-	o
2011	2	21	8	-	-	-	-	-	-	-	-	-	-	-	-	-	-
2001	2	22	8	-	-	-	-	-	-		-	-	-	-	-	-	-	-
2002	2	22	8	29.1	31.6	23	-	68	0	0	20.6	13	22.2	39.6
2003	2	22	8	-	-	-	-	-	-		-	-	-	-	-	-	-	-
2006	2	22	8	28.3	31.5	25	-	77	0	0	14.2	5.9	14.8	-	o
2007	2	22	8	28.3	29	25.6	1006.4	83	0	0	14	26.1	37	-	o
2008	2	22	8	28.1	31.1	24	1009.5	73	0.76	1	18.8	16.9	22.2	39.6	o
2009	2	22	8	-	-	-	-	-	-		-	-	-	-	-	-	-	-
2010	2	22	8	29.7	31.6	22.4	1012.8	68	5.08	1	19.6	17.8	22.2	-
2011	2	22	8	27.8	31.5	20.6	1011.7	64	0	28.3	13	18.3	-
2001	2	23	8	-	-	-	-	-	-		-	-	-	-	-	-	-	-
2002	2	23	8	-	-	-	-	-	-		-	-	-	-	-	-	-	-
2003	2	23	8	29.8	32	20.5	-	70	2.03	1	20.6	13	16.5	-
2006	2	23	8	30	32.7	26.9	1011.6	66	0	0	20.6	10.6	18.3	-
2007	2	23	8	28.8	32	25.2	1009.2	76	3.05	1	15.6	-	-	-	o
2008	2	23	8	28.8	31.5	22.8	1009.2	65	0	0	20.6	15.4	20.6	35.9
2009	2	23	8	-	-	-	-	-	-		-	-	-	-	-	-	-	-
2010	2	23	8	30.1	32	23.8	1013.9	68	0	0	19.8	22.6	33.5	-
2011	2	23	8	26.5	31.5	24.4	1012.2	77	-	22.2	6.1	9.4	-	o
2001	2	24	8	-	-	-	-	-	-		-	-	-	-	-	-	-	-
2002	2	24	8	29.9	30.4	29.2	-	64	0	0	20.6	8.9	11.1	-
2003	2	24	8	29.6	31.4	22.2	1009.3	74	17.02	1	23.8	14.4	18.3	35.9
2006	2	24	8	27.7	30.8	24.5	1010	82	8.89	1	17.2	3.1	13	35.9	o
2007	2	24	8	27.3	30.4	23.4	1006.4	86	2.03	1	11.7	-	-	-	o		o
2008	2	24	8	28.9	32.8	26	-	64	0	0	17.7	9.6	16.5	-
2009	2	24	8	-	-	-	-	-	-		-	-	-	-	-	-	-	-
2010	2	24	8	29	31.1	23.7	1013.1	64	0	0	26.9	18.5	31.3	-
2011	2	24	8	27.1	31.5	20	1011.8	68	4.06	28.6	8	18.3	-
2001	2	25	8	28.9	30.5	24.7	1013.6	75	0	0	19.3	8.9	16.5	32.4	o
2002	2	25	8	28.3	31	23.2	-	62	0	0	22.5	8.1	18.3	32.4
2003	2	25	8	30.2	31.2	22.3	1012.2	68	0.25	1	22	22	24.1	39.6
2006	2	25	8	28.4	31.4	24.1	1009	76	0	0	21.2	7.6	14.8	-
2007	2	25	8	27.9	30.5	25	1007.7	88	0	0	17.1	-	-	-	o		o
2008	2	25	8	27.9	32.2	22.6	1012	64	0	0	20	16.1	18.3	39.6
2009	2	25	8	-	-	-	-	-	-		-	-	-	-	-	-	-	-
2010	2	25	8	29.6	31.2	22.7	1009.9	67	0	0	19.8	15.2	22.2	-
2011	2	25	8	-	-	-	-	-	-	-	-	-	-	-	-	-	-
2001	2	26	9	-	-	-	-	-	-		-	-	-	-	-	-	-	-
2002	2	26	9	28.2	30.6	22.5	-	71	0	0	25.3	10.2	18.3	35.9
2003	2	26	9	29.9	31	23.3	1014.5	66	0	0	26.2	22.6	29.4	55.4
2006	2	26	9	28.8	32	25	1008.7	76	0	0	20.4	6.1	14.8	32.4
2007	2	26	9	27.8	30.8	23.5	1011.6	77	0	0	18.5	-	-	-	o
2008	2	26	9	27.4	31.1	22.6	1010.5	76	0	0	18.3	10.2	18.3	35.9
2009	2	26	9	-	-	-	-	-	-		-	-	-	-	-	-	-	-
2010	2	26	9	29.7	31.8	22.7	1009.9	68	0	0	20.6	14.3	27.8	-
2011	2	26	9	27.3	30.8	20	1010.7	72	2.03	28.3	8.9	18.3	-
2001	2	27	9	-	-	-	-	-	-		-	-	-	-	-	-	-	-
2002	2	27	9	29.5	31.2	23.4	1015.2	64	0	0	26.2	15.6	22.2	35.9
2003	2	27	9	25.9	27	21.3	1012.3	91	0.51	1	11.6	16.3	18.3	39.6	o
2006	2	27	9	30.5	32.4	24.1	1006.5	69	0	0	19.3	13.1	18.3	25.2
2007	2	27	9	27.7	31.2	24	1009.7	73	0	0	17.2	-	-	-
2008	2	27	9	28.9	32.4	22.8	1010.3	76	0	0	19	13.1	18.3	25.2
2009	2	27	9	-	-	-	-	-	-		-	-	-	-	-	-	-	-
2010	2	27	9	26.3	29	22.2	1012.5	89	26.92	1	19.5	16.7	27.8	-	o
2011	2	27	9	28.4	31.4	25.8	1011.3	70	0	29.9	15.7	22.2	-
2001	2	28	9	-	-	-	-	-	-		-	-	-	-	-	-	-	-
2002	2	28	9	-	-	-	-	-	-		-	-	-	-
2003	2	28	9	-	-	-	-	-	-		-	-	-	-
2006	2	28	9	30.4	32	26	1006.2	75	2.03	1	18	13.3	22.2	-	o
2007	2	28	9	27.2	31	22.6	1008.4	77	0	0	18.7	-	-	-
2008	2	28	9	29.6	32	22.9	1012.1	75	0	0	20.4	13.1	22.2	32.4
2009	2	28	9	-	-	-	-	-	-		-	-	-	-	-	-	-	-
2010	2	28	9	29.5	31	23.1	-	70	7.87	1	17.2	28.7	40.7
2011	2	28	9	27.9	31.4	21.5	1010.8	73	0	29.1	18.5	22.2	-
2008	2	29	9	27.9	31.5	24.4	1013.8	79	0.25	1	18.2	6.5	18.3	39.6
2001	3	1	9	-	-	-	-	-	-		-	-	-	-	-	-	-	-
2002	3	1	9	30.5	32	23.4	1016.3	61	0	0	20.6	11.9	22.2	39.6
2003	3	1	9	-	-	-	-	-	-		-	-	-	-	-	-	-	-
2006	3	1	9	27.3	29.4	26	1008.2	87	0	0	12.7	2.2	7.6	-	o		o
2007	3	1	9	28.2	32	23.4	1009.2	72	0	0	17.7	-	-	-
2008	3	1	9	29.2	32	24	1013.8	73	0	0	19.5	6.7	14.8	18
2009	3	1	9	-	-	-	-	-	-		-	-	-	-	-	-	-	-
2010	3	1	9	26.1	27.5	22.4	1013.9	88	2.03	1	12.6	19.1	27.8	-	o
2011	3	1	9	24.6	25	20.7	1011.8	93	33.02	15.9	10.2	18.3	-	o
2001	3	2	9	-	-	-	-	-	-		-	-	-	-	-	-	-	-
2002	3	2	9	31.2	32.2	29.8	-	54	0	0	20.6	13.9	18.3	-
2003	3	2	9	25.6	26	21	1004.2	94	65.02	1	7.4	38.3	44.3	74.1	o
2006	3	2	9	29.2	31.6	24	1007.4	80	4.06	1	18.7	5	14.8	-
2007	3	2	9	28	32.2	22.8	1011.1	70	0	0	17.4	-	-	-
2008	3	2	9	30.2	32	23	1015	70	0	0	18.8	8.5	18.3	35.9
2009	3	2	9	-	-	-	-	-	-		-	-	-	-	-	-	-	-
2010	3	2	9	29.2	31.4	22.7	1013.7	70	12.95	1	19.8	13.9	27.8	-
2011	3	2	9	26.9	29.8	19.3	1012	70	0	29.9	7.4	16.5	-
2001	3	3	9	-	-	-	-	-	-		-	-	-	-	-	-	-	-
2002	3	3	9	-	-	-	-	-	-		-	-	-	-	-	-	-	-
2003	3	3	9	27.7	28.3	23.2	-	87	42.93	1	20.6	18.7	25.9	-
2006	3	3	9	28.7	31.6	24.9	1007.9	79	0	0	16.9	8.5	18.3	28.7	o
2007	3	3	9	25.9	31.4	21.6	1010.6	81	0	0	22	-	-	-
2008	3	3	9	29.1	32.6	24.8	1016.7	73	0	0	20.6	8.7	18.3	32.4	o
2009	3	3	9	-	-	-	-	-	-		-	-	-	-	-	-	-	-
2010	3	3	9	29.7	31	22	-	59	0	0	19.3	24.1	33.5	-
2011	3	3	9	28.3	30	18.2	1011.9	70	0	29.9	9.3	16.5	-
2001	3	4	9	-	-	-	-	-	-		-	-	-	-	-	-	-	-
2002	3	4	9	29.9	31.4	23.8	1013.4	67	1.02	1	27.5	-	-	-
2003	3	4	9	28.8	30	23.1	1010	85	0	0	22	11.7	14.8	-
2006	3	4	9	24.7	26	22.1	1012.3	91	23.11	1	9.5	24.6	31.3	61.1	o
2007	3	4	9	28.2	32.1	21.6	1008	66	0	0	17.9	-	-	-
2008	3	4	9	29.9	32.4	23.9	1015	67	0	0	22.2	14.8	22.2	35.9
2009	3	4	9	-	-	-	-	-	-		-	-	-	-	-	-	-	-
2010	3	4	9	26.9	29.6	21	1017.9	66	1.02	1	23.8	9.3	18.3	-	o
2011	3	4	9	28.3	30.1	20.3	1013.5	66	0	29.9	16.1	18.3	-	o
2001	3	5	10	-	-	-	-	-	-		-	-	-	-	-	-	-	-
2002	3	5	10	30.1	31.9	23.7	-	65	1.02	1	25.3	13.9	14.8	35.9
2003	3	5	10	29.3	30.8	22.1	1009.8	82	0	0	26.2	8.9	13	14.4
2006	3	5	10	25.2	27.2	22	1016.1	85	7.11	1	10.5	24.1	29.4	-	o
2007	3	5	10	27.8	32	22.6	1010	74	0	0	19.5	-	-	-
2008	3	5	10	28.7	32.5	25.7	1013.4	70	0	0	17.9	10.9	18.3	-
2009	3	5	10	-	-	-	-	-	-		-	-	-	-	-	-	-	-
2010	3	5	10	26.4	29.9	19.4	1017.4	66	0	0	28.3	8.9	27.8	-
2011	3	5	10	-	-	-	-	-	-	-	-	-	-	-	-	-	-
2001	3	6	10	-	-	-	-	-	-		-	-	-	-	-	-	-	-
2002	3	6	10	29.9	32.2	23.1	1013	72	0.25	1	26.9	11.3	25.2	35.9
2003	3	6	10	28.9	30	23.5	1008.5	82	0	0	20.6	10.7	14.8	21.7
2006	3	6	10	26.1	27.9	22.4	1014.7	83	27.94	1	11.1	21.9	29.4	57.2	o
2007	3	6	10	27.6	32	25	-	77	0	0	13.2	-	-	-
2008	3	6	10	29.2	32.4	24.4	1014.1	69	0	0	20	17	22.2	32.4
2009	3	6	10	-	-	-	-	-	-		-	-	-	-	-	-	-	-
2010	3	6	10	27.3	30.4	22.1	1016.8	69	0	0	29.9	15.6	24.1	-
2011	3	6	10	-	-	-	-	-	-	-	-	-	-	-	-	-	-
2001	3	7	10	28.7	30	24.8	-	86	0.76	1	18.8	17	33.5	-
2002	3	7	10	30.8	32.6	23.8	1014.1	68	0	0	20.6	6.5	11.1	25.2
2003	3	7	10	-	-	-	-	-	-		-	-	-	-	-	-	-	-
2006	3	7	10	26.9	30.2	24	1012	81	0	0	14.2	14.6	20.6	-	o
2007	3	7	10	28.1	30	24	-	69	0	0	11.3	-	-	-
2008	3	7	10	29.1	32.2	24.8	1013.5	70	0	0	17.4	13.7	20.6	39.6	o
2009	3	7	10	-	-	-	-	-	-		-	-	-	-	-	-	-	-
2010	3	7	10	27.3	30.1	21.4	1017.1	71	2.03	1	28	19.6	25.9	-
2011	3	7	10	-	-	-	-	-	-	-	-	-	-	-	-	-	-
2001	3	8	10	30.1	31.9	25	1009	77	0.25	1	27.5	6.5	13	21.7
2002	3	8	10	29.7	32.2	23	1016.3	68	2.03	1	19	15	25.9	28.7	o
2003	3	8	10	28.8	30.2	21	-	74	0	0	22.5	17.4	33.5	-
2006	3	8	10	27.8	30	23.4	1011.6	68	2.03	1	20.6	10.6	18.3	21.7
2007	3	8	10	-	-	-	-	-	-		-	-	-	-	-	-	-	-
2008	3	8	10	28.1	32.5	24	1011.8	78	0	0	16.6	8.5	18.3	35.9
2009	3	8	10	-	-	-	-	-	-		-	-	-	-	-	-	-	-
2010	3	8	10	29.2	30	21.8	1014.4	68	2.03	1	22	19.6	31.3	-
2011	3	8	10	26.2	31	19.5	1012.2	74	0	28.3	5.2	16.5	-
2001	3	9	10	28.8	30	26	-	80	0	0	10.8	17.8	22.2	-	o
2002	3	9	10	27.5	28.8	23.9	1016.5	65	2.03	1	20.4	22.4	25.9	28.7
2003	3	9	10	28.8	30.2	27	-	72	0	0	18.8	7.8	11.1	-
2006	3	9	10	25.6	28.5	22.4	1012.8	80	0	0	20.4	6.1	13	28.7	o
2007	3	9	10	26.1	29.8	21.6	1017	78	7.87	1	15.6	-	-	-	o
2008	3	9	10	26.9	30.6	23.8	1011	83	7.87	1	16.6	9.4	18.3	28.7	o
2009	3	9	10	-	-	-	-	-	-		-	-	-	-	-	-	-	-
2010	3	9	10	25.4	27.2	21	1011.2	90	18.03	1	12.6	18.5	27.8	-	o
2011	3	9	10	29	30.4	19.2	1012.2	62	0	29.9	12.6	18.3	-
2001	3	10	10	-	-	-	-	-	-		-	-	-	-	-	-	-	-
2002	3	10	10	27.6	29.2	23.4	1014.5	71	0.25	1	18	15.6	22.2	-	o
2003	3	10	10	28.8	30.4	19.4	-	66	0	0	25.3	13.3	22.2	32.4
2006	3	10	10	26.9	30	22	1013.8	69	4.06	1	16.6	7	18.3	-
2007	3	10	10	26.7	31	22.4	1015.1	79	0	0	16.7	-	-	-
2008	3	10	10	27.9	31.4	23	1010.2	78	1.02	1	19.6	6.9	18.3	-	o
2009	3	10	10	-	-	-	-	-	-		-	-	-	-	-	-	-	-
2010	3	10	10	28.3	30.3	20.9	1009.5	75	39.12	1	20.6	11.5	24.1	-
2011	3	10	10	-	-	-	-	-	-	-	-	-	-	-	-	-	-
2001	3	11	10	31	33	24	-	67	0	0	22.5	19.6	22.2	39.6
2002	3	11	10	29.2	31	23.8	1011.8	63	2.03	1	19.6	13.9	18.3	-
2003	3	11	10	27.7	29.9	19	1015.8	67	0	0	26.2	16.3	22.2	39.6
2006	3	11	10	27.8	30.9	21.7	1011.3	70	0	0	20	5.6	13	18
2007	3	11	10	27.3	31.8	23.8	1012.6	80	0	0	15.3	-	-	-
2008	3	11	10	28.3	31	23.6	-	79	0	0	16.4	5	13	35.9
2009	3	11	10	-	-	-	-	-	-		-	-	-	-	-	-	-	-
2010	3	11	10	28.9	32.1	22.2	1010.6	72	0	0	20.6	14.3	24.1	-
2011	3	11	10	28.3	30.7	21.7	1011.6	77	-	26.6	10.6	14.8	-	o
2001	3	12	11	30.9	32.5	24.5	-	74	0	0	20.6	21.3	25.9	39.6
2002	3	12	11	29.8	32.2	26	-	61	0	0	19.3	14.4	22.2	-
2003	3	12	11	28.1	29.2	20.5	1014.4	71	0.76	1	20.4	13	16.5	35.9
2006	3	12	11	28.2	31	24	1007.8	75	0	0	23.2	9.1	20.6	35.9
2007	3	12	11	27.7	33	23	1013.4	77	0	0	18	-	-	-
2008	3	12	11	29.7	33	24.2	1008.6	69	5.08	1	21.4	11.3	24.1	32.4
2009	3	12	11	-	-	-	-	-	-		-	-	-	-	-	-	-	-
2010	3	12	11	29.3	31	21.9	-	69	0	0	15.9	14.6	31.3	-
2011	3	12	11	29.7	31.9	22.5	1010.2	75	0	29.9	15.7	18.3	-
2001	3	13	11	26.2	28	23	-	86	0.76	1	12.6	17.6	25.9	39.6	o		o
2002	3	13	11	30.6	32.4	22.8	1010.8	57	0	0	20.4	8.1	14.8	39.6
2003	3	13	11	28.4	31	21	1012.5	76	3.05	1	20.6	5.9	14.8	18
2006	3	13	11	28.4	32.7	23.8	1011	81	9.91	1	15.3	8.5	18.3	35.9	o		o
2007	3	13	11	28	33.6	22.2	1012.2	73	0	0	16.3	-	-	-
2008	3	13	11	27.9	32.2	23.6	1007.5	78	0	0	15.3	18.5	22.2	39.6	o
2009	3	13	11	-	-	-	-	-	-		-	-	-	-	-	-	-	-
2010	3	13	11	-	-	-	-	-	-		-	-	-	-	-	-	-	-
2011	3	13	11	29.2	31.2	23.5	1011.9	77	0	27.5	11.1	18.3	-
2001	3	14	11	26.1	27.4	25	-	89	3.05	1	12.6	18.5	22.2	-	o
2002	3	14	11	30.8	33	27	-	62	0	0	19.3	15.4	20.6	-
2003	3	14	11	29.1	32	19.6	1011.3	73	0	0	20.6	12.4	20.6	32.4
2006	3	14	11	24.9	26.5	22.4	1016.6	92	33.02	1	11.4	8.3	13	32.4	o
2007	3	14	11	27.8	32	21.4	1012.4	68	0	0	15.3	-	-	-
2008	3	14	11	27.8	31	23.5	1008.9	79	2.03	1	16.4	19.1	25.9	28.7	o
2009	3	14	11	-	-	-	-	-	-		-	-	-	-	-	-	-	-
2010	3	14	11	28.9	31	23	1010.6	73	39.88	1	19.8	18.7	33.5	-
2011	3	14	11	29.2	32	23.2	1013.1	76	0	27.5	11.7	13	-
2001	3	15	11	24.4	25.6	24	-	97	0	0	3.1	6.5	9.4	-	o		o
2002	3	15	11	28.6	30.6	23.3	-	73	0.51	1	17.2	9.6	13	25.2
2003	3	15	11	30.2	32.7	21.6	1009.7	77	0	0	22	6.9	13	39.6
2006	3	15	11	26.7	30	23.5	1017.7	81	11.94	1	17.7	5.2	14.8	-
2007	3	15	11	28.2	32	23.6	1010.8	71	0	0	20.6	-	-	-
2008	3	15	11	29.3	32.5	23.6	1009.1	71	6.1	1	18.5	15.4	18.3	28.7
2009	3	15	11	-	-	-	-	-	-		-	-	-	-	-	-	-	-
2010	3	15	11	27.3	29.4	22.6	1015	69	5.08	1	26.2	14.8	22.2	-	o
2011	3	15	11	29	32.2	22	1014.5	74	-	25.7	8.9	22.2	-	o
2001	3	16	11	-	-	-	-	-	-		-	-	-	-	-	-	-	-
2002	3	16	11	27.3	29.6	23.8	-	77	3.05	1	22.2	19.3	25.9	32.4	o
2003	3	16	11	-	-	-	-	-	-		-	-	-	-	-	-	-	-
2006	3	16	11	27.9	32.5	22.2	1014	76	0.51	1	18	4.3	11.1	21.7
2007	3	16	11	28.6	32.3	22.5	1009.1	72	0	0	17.9	-	-	-
2008	3	16	11	24.4	25.2	23	1015.3	82	0.76	1	13.4	23.5	29.4	32.4	o
2009	3	16	11	-	-	-	-	-	-		-	-	-	-	-	-	-	-
2010	3	16	11	-	-	-	-	-	-		-	-	-	-	-	-	-	-
2011	3	16	11	29.1	32.6	21.9	1014.5	73	0	29.9	10.2	18.3	-
2001	3	17	11	-	-	-	-	-	-		-	-	-	-	-	-	-	-
2002	3	17	11	28.5	29.7	22.2	-	59	3.05	1	25.3	9.6	14.8	25.2
2003	3	17	11	30.3	31	22.3	1015.6	70	0	0	20.6	13	16.5	39.6
2006	3	17	11	28.9	33	23.9	1013.5	74	0	0	18	5.7	18.3	39.6
2007	3	17	11	29.3	34	25.4	1007.9	71	0	0	18	-	-	-
2008	3	17	11	25.8	28	22.1	1018.3	69	8.89	1	18.8	24.1	27.8	-
2009	3	17	11	-	-	-	-	-	-		-	-	-	-	-	-	-	-
2010	3	17	11	-	-	-	-	-	-		-	-	-	-	-	-	-	-
2011	3	17	11	28.9	31.5	21.5	1013.3	70	0	27.5	10.2	14.8	-
2001	3	18	11	-	-	-	-	-	-		-	-	-	-	-	-	-	-
2002	3	18	11	28.2	29.6	22.8	1014.4	68	0	0	22	8	16.5	39.6
2003	3	18	11	30.1	31.4	28	-	72	0	0	19.3	14.3	18.3	-
2006	3	18	11	29	31.5	24.3	1013.2	71	0.76	1	18	7.4	16.5	39.6
2007	3	18	11	26	30.4	22.6	1010.5	75	2.03	1	17.4	-	-	-	o		o
2008	3	18	11	24.8	27.9	20	1017.7	72	4.06	1	14.2	7.6	18.3	28.7	o
2009	3	18	11	-	-	-	-	-	-		-	-	-	-	-	-	-	-
2010	3	18	11	-	-	-	-	-	-		-	-	-	-	-	-	-	-
2011	3	18	11	-	-	-	-	-	-	-	-	-	-	-	-	-	-
2001	3	19	12	-	-	-	-	-	-		-	-	-	-	-	-	-	-
2002	3	19	12	29.8	32.2	21.8	1013.5	62	0	0	22	5	11.1	18
2003	3	19	12	-	-	-	-	-	-		-	-	-	-	-	-	-	-
2006	3	19	12	29.6	32.7	24.6	1012.1	74	0	0	27.4	5	9.4	32.4
2007	3	19	12	24.7	27	20.6	1011.8	69	0	0	18.8	-	-	-
2008	3	19	12	25.8	28	19.9	1015.8	71	0	0	20.6	8.1	13	-
2009	3	19	12	-	-	-	-	-	-		-	-	-	-	-	-	-	-
2010	3	19	12	27	28.9	20.8	1015.3	71	0	0	29.9	8.9	22.2	-
2011	3	19	12	-	-	-	-	-	-	-	-	-	-	-	-	-	-
2001	3	20	12	27.9	29.2	26	-	56	0	0	18.5	15.9	22.2	-
2002	3	20	12	31.1	32	29.6	-	57	0	0	25.3	10.2	13	-
2003	3	20	12	29.7	32	22	-	72	0	0	18.3	12.8	18.3	35.9
2006	3	20	12	29.1	33.2	24.3	1013.2	78	0	0	19.2	5.7	14.8	32.4
2007	3	20	12	25.9	30	20.8	1010.2	83	2.03	1	15.8	-	-	-	o
2008	3	20	12	26.1	30.5	21.6	1013.8	77	0	0	20.6	4.6	9.4	21.7
2009	3	20	12	-	-	-	-	-	-		-	-	-	-	-	-	-	-
2010	3	20	12	26.9	29.4	20.4	1014.1	69	0	0	25.9	5	11.1	-
2011	3	20	12	-	-	-	-	-	-	-	-	-	-	-	-	-	-
2001	3	21	12	-	-	-	-	-	-		-	-	-	-	-	-	-	-
2002	3	21	12	30.1	32	26	-	61	0	0	16.9	5.6	11.1	-
2003	3	21	12	29.6	31.8	21.7	-	72	0	0	20.6	7.8	11.1	35.9
2006	3	21	12	29.1	32.2	24.5	1014.2	74	0	0	19.8	5.9	20.6	35.9
2007	3	21	12	28.8	32	22.8	1010.6	79	0	0	18	-	-	-
2008	3	21	12	26.8	29.5	22.3	1013.6	75	3.05	1	18.8	14.1	24.1	35.9	o
2009	3	21	12	-	-	-	-	-	-		-	-	-	-	-	-	-	-
2010	3	21	12	27.4	30.6	20.6	1014.8	67	0	0	29.9	13	24.1	-
2011	3	21	12	29.2	31.2	22.1	-	73	0	27.5	6.5	14.8	-
2001	3	22	12	-	-	-	-	-	-		-	-	-	-	-	-	-	-
2002	3	22	12	29.9	31.2	22.8	-	61	0	0	19.2	9.8	14.8	39.6
2003	3	22	12	30.2	33.2	21	-	77	0	0	25.3	12.6	18.3	32.4
2006	3	22	12	27.9	33.2	23.9	1013.1	78	0	0	20.3	10.2	18.3	35.9	o
2007	3	22	12	29.4	33.6	24.2	1011.8	78	0	0	19.5	-	-	-
2008	3	22	12	26.7	29.2	22.8	1012.8	75	2.03	1	17.4	7.4	11.1	35.9	o
2009	3	22	12	-	-	-	-	-	-		-	-	-	-	-	-	-	-
2010	3	22	12	26.9	29.1	20.6	1012.1	76	1.02	1	15.9	8.5	20.6	-	o
2011	3	22	12	28.3	33.5	23.3	1009.1	83	0	27.5	9.8	13	-			o
2001	3	23	12	-	-	-	-	-	-		-	-	-	-	-	-	-	-
2002	3	23	12	29.6	32	22.2	-	63	0	0	22.5	12.2	18.3	39.6
2003	3	23	12	30.4	32	22	1009.4	80	0	0	19.6	20.6	25.9	-
2006	3	23	12	26.4	29.5	24.4	1014.4	86	4.06	1	15.4	13	20.6	39.6	o
2007	3	23	12	29.1	32	25	1012.5	78	0	0	17.5	-	-	-
2008	3	23	12	26.8	30	21.8	1015.6	72	2.03	1	19.3	9.8	18.3	21.7	o
2009	3	23	12	-	-	-	-	-	-		-	-	-	-	-	-	-	-
2010	3	23	12	29.2	32	20.6	1009.8	72	3.05	1	18.8	8.7	22.2	-			o
2011	3	23	12	29.6	34.2	23	1010	75	0	29.9	9.3	14.8	-
2001	3	24	12	-	-	-	-	-	-		-	-	-	-	-	-	-	-
2002	3	24	12	28.6	30	23.4	1018.2	66	0	0	23.8	16.7	22.2	39.6	o
2003	3	24	12	29.3	31.6	24.5	1009.7	78	0	0	23.8	20.4	25.9	39.6
2006	3	24	12	26.9	29.4	23.3	1014.9	70	18.03	1	20.9	16.5	22.2	-
2007	3	24	12	28.4	32.8	23.5	1014	78	0	0	17.4	-	-	-
2008	3	24	12	23.8	25.4	21.4	-	86	2.03	1	13.8	2.2	5.4	28.7	o
2009	3	24	12	-	-	-	-	-	-		-	-	-	-	-	-	-	-
2010	3	24	12	29.2	32.5	22.7	1010.5	72	0	0	20.6	10	22.2	-
2011	3	24	12	30.1	33	28	1010	76	0	29.9	14.8	18.3	-
2001	3	25	12	-	-	-	-	-	-		-	-	-	-	-	-	-	-
2002	3	25	12	27.3	29.6	22	1016.8	66	2.03	1	20.3	8.7	13	32.4	o
2003	3	25	12	29.1	31	22	-	83	0	0	15.9	13.3	18.3	32.4			o
2006	3	25	12	27.6	30.1	23.4	1013.8	72	0	0	18.3	13.7	18.3	32.4	o
2007	3	25	12	28.7	32	25	1015.2	76	0	0	16.3	-	-	-
2008	3	25	12	26.3	30	19.4	1013.6	69	40.89	1	19.5	10	14.8	-
2009	3	25	12	-	-	-	-	-	-		-	-	-	-	-	-	-	-
2010	3	25	12	30.4	33.2	23.3	1012.5	72	0	0	26.9	9.3	18.3	-
2011	3	25	12	29.2	31.7	23	1011.7	74	0	28	8.5	18.3	-
2001	3	26	13	-	-	-	-	-	-		-	-	-	-	-	-	-	-
2002	3	26	13	26	29.2	21.8	1015.5	74	2.03	1	22.2	10.9	14.8	32.4	o
2003	3	26	13	28.8	30.4	22	1011	83	2.03	1	22	12.4	18.3	-
2006	3	26	13	26.4	29	23.4	1013.1	89	0.51	1	17.2	3.7	9.4	32.4			o
2007	3	26	13	28.1	32	23	1013.2	80	0	0	18.5	-	-	-
2008	3	26	13	26.3	29.8	21.7	1012.5	72	0	0	15.9	6.7	14.8	39.6	o
2009	3	26	13	-	-	-	-	-	-		-	-	-	-	-	-	-	-
2010	3	26	13	30.1	32.4	24.5	1014	72	0	0	18.8	13.3	22.2	-
2011	3	26	13	30.7	32.6	22.3	1013.7	67	0	29.9	11.7	18.3	-
2001	3	27	13	-	-	-	-	-	-		-	-	-	-	-	-	-	-
2002	3	27	13	28.6	32.8	21.8	-	64	0	0	17.5	6.3	9.4	18
2003	3	27	13	28.4	29.6	21.8	1017.3	67	0	0	20.6	18.3	18.3	-
2006	3	27	13	28.3	31.3	24.1	1009.8	84	0	0	17.9	6.3	13	-	o		o
2007	3	27	13	28.5	33.1	23.2	1013.4	79	0	0	15.8	-	-	-	o		o
2008	3	27	13	26.1	30	20	1013.2	63	0.51	1	17.9	10.6	20.6	25.2
2009	3	27	13	-	-	-	-	-	-		-	-	-	-	-	-	-	-
2010	3	27	13	29.7	31.7	23.6	1012.2	72	0	0	26.2	12.2	18.3	-
2011	3	27	13	29	32	21.5	1017.2	69	0	29.9	6.7	18.3	-
2001	3	28	13	-	-	-	-	-	-		-	-	-	-	-	-	-	-
2002	3	28	13	29.4	31.6	23.5	-	70	0	0	20	16.3	25.9	39.6
2003	3	28	13	28.2	29.4	22	-	69	0	0	22.5	-	-	-
2006	3	28	13	25.4	31.2	22.6	1012.9	88	32	1	12.6	10.4	20.6	28.7	o		o
2007	3	28	13	27.1	29.6	23.2	1016.6	88	27.94	1	16.1	-	-	-	o		o
2008	3	28	13	25.6	29.8	21.5	1013.1	69	0	0	18	7.6	16.5	39.6
2009	3	28	13	-	-	-	-	-	-		-	-	-	-	-	-	-	-
2010	3	28	13	30.6	32.5	24.2	1012.8	72	0	0	20.6	9.1	20.6	-
2011	3	28	13	28.4	30.9	22	1016.4	71	0	28	10.4	18.3	-
2001	3	29	13	-	-	-	-	-	-		-	-	-	-	-	-	-	-
2002	3	29	13	25.8	26.8	23.8	1017.7	79	0	0	26.2	8.1	22.2	35.9			o
2003	3	29	13	-	-	-	-	-	-		-	-	-	-	-	-	-	-
2006	3	29	13	24.7	32	21.9	1015.8	85	5.08	1	13.8	20.4	25.9	-	o
2007	3	29	13	27.7	31.5	23.6	1016.1	81	1.02	1	21.1	-	-	-			o
2008	3	29	13	26.6	29.8	20	1015.6	65	0	0	18.5	5.9	13	32.4
2009	3	29	13	-	-	-	-	-	-		-	-	-	-	-	-	-	-
2010	3	29	13	30.1	33.7	24	1016.1	73	0	0	19.3	5.6	16.5	-	o
2011	3	29	13	26.8	32.5	20.5	1014.2	77	0	27.5	3.1	13	-
2001	3	30	13	-	-	-	-	-	-		-	-	-	-	-	-	-	-
2002	3	30	13	27.6	29.4	22	1019.5	56	0	0	23.8	17.2	25.9	-
2003	3	30	13	-	-	-	-	-	-		-	-	-	-	-	-	-	-
2006	3	30	13	25.4	27.8	21	1015.9	83	0	0	14.6	14.8	20.6	-	o
2007	3	30	13	24	26.4	19.5	1015.4	90	70.1	1	11.1	-	-	-	o
2008	3	30	13	25.2	28.1	21.4	1015.9	72	7.11	1	18.2	8.5	16.5	39.6
2009	3	30	13	-	-	-	-	-	-		-	-	-	-	-	-	-	-
2010	3	30	13	30.4	32.3	25.2	-	72	0	0	18.3	11.3	18.3	-
2011	3	30	13	29.7	31.2	20.2	1013.9	59	0	29.9	12.4	18.3	-
2001	3	31	13	-	-	-	-	-	-		-	-	-	-	-
2002	3	31	13	27.9	31	19.2	1018.2	54	0	0	22	9.8	18.3	28.7
2003	3	31	13	28.4	29.8	22	1014.4	78	0	0	19	3.1	13	32.4	o
2006	3	31	13	25.7	30.2	21	1015.2	82	0	0	20.6	8.5	16.5
2007	3	31	13	23.9	25.5	20.6	1016.3	91	32	1	11.4	-
2008	3	31	13	25.4	28.3	20.3	1015.2	67	0	0	17.1	11.5	20.6	35.9
2009	3	31	13	-	-	-	-	-	-		-	-	-	-	-	-	-	-
2010	3	31	13	29.6	31.8	23.8	1015.6	67	0	0	18.8	13.5	31.3
2011	3	31	13	27.6	31.1	19.5	1013.9	62	0	29.9	8.7	14.8	-
2001	4	1	13	-	-	-	-	-	-		-	-	-	-	-	-	-	-
2002	4	1	13	27.6	29.2	21	-	56	0	0	18.3	7.4	18.3	35.9
2003	4	1	13	29.2	31.2	22	1015.2	76	2.03	1	26.2	-	-	-
2006	4	1	13	26	30.3	23.1	1014.7	78	0.76	1	17.5	7	14.8	-	o
2007	4	1	13	26.8	30	23	1015.5	77	0	0	18	-	-	-
2008	4	1	13	25.6	29	19.5	1015.5	61	0	0	19.2	9.8	16.5	35.9
2009	4	1	13	-	-	-	-	-	-		-	-	-	-	-	-	-	-
2010	4	1	13	29.2	32	21.2	1015.3	68	0	0	29.9	9.3	14.8	-
2011	4	1	13	26.6	29.1	19.4	1014.1	81	0	29.9	0	-	-
2001	4	2	14	-	-	-	-	-	-		-	-	-	-	-	-	-	-
2002	4	2	14	-	-	-	-	-	-		-	-	-	-	-	-	-	-
2003	4	2	14	28.9	31.2	22.5	1014.5	81	0.25	1	23.8	0	-	28.7
2006	4	2	14	25.9	30.4	22	1016.8	76	0	0	19.5	8	18.3	32.4
2007	4	2	14	26.1	28	23.6	-	84	5.08	1	13.5	-	-	-	o
2008	4	2	14	24.7	28	19.9	1016.8	69	0	0	14.8	9.6	14.8	35.9	o
2009	4	2	14	-	-	-	-	-	-		-	-	-	-	-	-	-	-
2010	4	2	14	30.2	31.6	22.2	-	66	0	0	16.9	12.6	27.8	-
2011	4	2	14	27.2	29.9	25.8	1011.6	82	0.25	23.2	6.5	16.5	-	o
2001	4	3	14	-	-	-	-	-	-		-	-	-	-	-	-	-	-
2002	4	3	14	27.7	29.8	21	-	66	0	0	22.5	11.5	14.8	35.9
2003	4	3	14	30.6	33	22	1014.3	70	0	0	22	3	14.8	18
2006	4	3	14	26.9	30.5	21.6	1018.9	69	0	0	17.1	9.4	18.3	35.9
2007	4	3	14	26.2	28	21.6	1014.9	85	21.08	1	12.6	4.4	9.4	-	o		o
2008	4	3	14	24.2	27	19.5	1018	66	0.76	1	17.4	15.4	25.9	28.7	o
2009	4	3	14	-	-	-	-	-	-		-	-	-	-	-	-	-	-
2010	4	3	14	28.8	31.2	22.1	1012.6	73	0	0	21.6	7	16.5	-
2011	4	3	14	29.9	32.8	21.5	1010.7	75	0	29.9	7	18.3	-
2001	4	4	14	-	-	-	-	-	-		-	-	-	-	-	-	-	-
2002	4	4	14	28.2	30	22.8	1016.3	67	0	0	23.8	11.7	14.8	35.9
2003	4	4	14	30	32	21.4	-	74	0	0	22.5	-	-	-
2006	4	4	14	26.2	30	22.6	1016.3	72	0	0	17.4	5	14.8	35.9
2007	4	4	14	-	-	-	-	-	-		-	-	-	-	-	-	-	-
2008	4	4	14	24.4	27.2	18.3	1015.1	63	3.05	1	18	5.9	13	32.4	o
2009	4	4	14	-	-	-	-	-	-		-	-	-	-	-	-	-	-
2010	4	4	14	30.4	32.3	22.7	1012.5	70	0	0	18	15.6	27.8	-
2011	4	4	14	-	-	-	-	-	-	-	-	-	-	-	-	-	-
2001	4	5	14	-	-	-	-	-	-		-	-	-	-	-	-	-	-
2002	4	5	14	28.6	30.6	20.5	1014.2	62	0	0	26.2	7	11.1	18
2003	4	5	14	-	-	-	-	-	-		-	-	-	-	-	-	-	-
2006	4	5	14	25.8	30.6	20.6	1015.8	73	0	0	16.9	4.6	18.3	-
2007	4	5	14	26.1	32.2	22.4	-	85	0	0	22.5	0	-	28.7
2008	4	5	14	24.8	28.2	17.9	1014	68	0	0	18.3	11.7	22.2	35.9
2009	4	5	14	-	-	-	-	-	-		-	-	-	-	-	-	-	-
2010	4	5	14	30.2	32.1	26	-	72	4.06	1	12.9	19.4	27.8	-	o		o
2011	4	5	14	26.8	27.8	25	1017.9	72	0	19.5	22.6	27.8	-	o
2001	4	6	14	-	-	-	-	-	-		-	-	-	-	-	-	-	-
2002	4	6	14	-	-	-	-	-	-		-	-	-	-	-	-	-	-
2003	4	6	14	-	-	-	-	-	-		-	-	-	-	-	-	-	-
2006	4	6	14	26.7	30.4	22.4	1015.8	77	0.25	1	15.6	8.1	14.8	35.9	o
2007	4	6	14	28.1	32	22.5	1014.4	79	0	0	17.4	1.7	18.3	35.9	o		o
2008	4	6	14	26.3	29	23.8	1012.9	67	0	0	16.4	16.5	20.6	-
2009	4	6	14	-	-	-	-	-	-		-	-	-	-	-	-	-	-
2010	4	6	14	29.5	31	23.1	-	75	0	0	15	14.6	22.2	-	o		o
2011	4	6	14	-	-	-	-	-	-	-	-	-	-	-	-	-	-
2001	4	7	14	22.9	25	19.6	-	85	2.03	1	11.1	6.9	14.4	32.4	o
2002	4	7	14	27.8	30.8	23	-	70	0	0	22.5	10.4	13	35.9
2003	4	7	14	-	-	-	-	-	-		-	-	-	-	-	-	-	-
2006	4	7	14	27.4	31	22.2	1013.7	74	0	0	19.5	8.1	18.3	28.7
2007	4	7	14	-	-	-	-	-	-		-	-	-	-	-	-	-	-
2008	4	7	14	27.2	31.8	19.7	1014	67	0	0	18.3	10.2	20.6	32.4
2009	4	7	14	-	-	-	-	-	-		-	-	-	-	-	-	-	-
2010	4	7	14	30	31.7	24	1009.9	73	0.51	1	20.6	10.6	18.3	-
2011	4	7	14	27.9	31.6	20.8	1013.9	78	0	28.6	4.8	14.8	-
2001	4	8	14	-	-	-	-	-	-		-	-	-	-	-	-	-	-
2002	4	8	14	28.8	29.6	23	-	66	0	0	25.3	18.1	22.2	25.2
2003	4	8	14	-	-	-	-	-	-		-	-	-	-	-	-	-	-
2006	4	8	14	27.8	32.3	20	1011.9	74	0	0	18.8	8.9	18.3	-
2007	4	8	14	-	-	-	-	-	-		-	-	-	-	-	-	-	-
2008	4	8	14	25	28.3	20.1	1016.8	79	0	0	19.2	4.4	9.4	39.6	o		o
2009	4	8	14	-	-	-	-	-	-		-	-	-	-	-	-	-	-
2010	4	8	14	28.1	32.4	24	1014.6	79	0	0	16.9	2.8	22.2	-	o		o
2011	4	8	14	26.1	28.5	21	1021.2	65	0.76	27.2	24.8	37	-
2001	4	9	15	-	-	-	-	-	-		-	-	-	-	-	-	-	-
2002	4	9	15	28.8	29.6	23.7	1013.8	67	0	0	22	16.3	22.2	28.7
2003	4	9	15	28.9	32	19.4	1007	71	5.08	1	26.2	-	-	-
2006	4	9	15	26.1	29.6	23	1013.5	79	0.51	1	15.9	10	18.3	32.4	o
2007	4	9	15	25.2	27.4	21.8	1015.4	80	13.97	1	15.4	11.5	18.3	-	o
2008	4	9	15	25.7	28	20.2	1017.2	63	0.51	1	19	10.2	18.3	-
2009	4	9	15	-	-	-	-	-	-		-	-	-	-	-	-	-	-
2010	4	9	15	28.8	31	26.5	1013.6	83	3.05	1	12.9	10.9	18.3	-	o		o
2011	4	9	15	25.2	27.9	19.1	1021.3	62	0	24.9	13.7	24.1	-	o
2001	4	10	15	25.9	28	23	-	73	7.11	1	15	8.3	29.4	-	o
2002	4	10	15	29.1	30.2	22.6	1013.7	66	0	0	22	14.8	22.2	35.9
2003	4	10	15	27.3	29.8	21	1013.4	78	0.51	1	20.3	-	-	-	o
2006	4	10	15	25.1	29	21.2	1015.9	81	18.03	1	15.6	8	20.6	21.7	o		o
2007	4	10	15	24.9	27.3	21.1	1013.4	86	22.1	1	11.9	8.3	20.6	-	o		o
2008	4	10	15	25	29.6	19.9	1016.2	71	0	0	18.2	5.6	11.1	35.9
2009	4	10	15	-	-	-	-	-	-		-	-	-	-	-	-	-	-
2010	4	10	15	29.7	33.5	21.6	1011.2	75	0	0	16.1	13	25.9	-	o
2011	4	10	15	25.5	28.2	17.8	1018.7	66	0	28.6	11.5	18.3	-
2001	4	11	15	26.6	29	21	-	67	0	0	20.6	2.2	7.6	32.4
2002	4	11	15	-	-	-	-	-	-		-	-	-	-	-	-	-	-
2003	4	11	15	27.1	27.6	21	1019.2	79	4.06	1	26.2	-	-	-
2006	4	11	15	25.5	29.4	21.6	1015.5	74	41.91	1	16.7	5.6	13	14.4
2007	4	11	15	26.2	31	22	1011.8	74	0.76	1	15.6	7.4	13	14.4
2008	4	11	15	25.2	29.5	19.2	1014.7	71	0	0	18	7.6	14.8	35.9
2009	4	11	15	-	-	-	-	-	-		-	-	-	-	-	-	-	-
2010	4	11	15	25.9	28	21.4	1017.7	65	6.1	1	21.6	17.6	33.5	-
2011	4	11	15	24.7	28.4	18	1016.7	72	1.02	27.8	11.7	51.9	-	o
2001	4	12	15	28.3	31	20.6	1016.5	65	0	0	23.8	1.9	5.4	35.9
2002	4	12	15	28	31	22.9	-	71	0	0	22.5	14.1	22.2	25.2
2003	4	12	15	-	-	-	-	-	-		-	-	-	-	-	-	-	-
2006	4	12	15	25.2	31	21	1012.5	83	0	0	22.2	3.3	11.1	32.4
2007	4	12	15	27.2	31.5	21.4	1013.2	74	0	0	18.5	5.4	13	35.9
2008	4	12	15	25.3	29.8	19.5	1014.5	77	0	0	19.3	5	14.8	35.9
2009	4	12	15	-	-	-	-	-	-		-	-	-	-	-	-	-	-
2010	4	12	15	25.8	28.3	19.9	1019.1	62	0	0	17.9	13.3	24.1	-	o
2011	4	12	15	25.8	28	19	1015.5	59	1.02	27.5	15.2	18.3	-
2001	4	13	15	27.6	31.2	21.6	-	72	0	0	18.8	0	-	35.9
2002	4	13	15	-	-	-	-	-	-		-	-	-	-	-	-	-	-
2003	4	13	15	-	-	-	-	-	-		-	-	-	-	-	-	-	-
2006	4	13	15	26.8	30.4	21.3	1010	73	0	0	18	5.4	16.5	28.7
2007	4	13	15	27.3	30	21	1018.6	74	0	0	18	4.6	11.1	39.6
2008	4	13	15	23.8	27	20.1	1013.6	86	7.87	1	16.1	5.7	9.4	32.4	o		o
2009	4	13	15	-	-	-	-	-	-		-	-	-	-	-	-	-	-
2010	4	13	15	25	27.4	19.9	1019	74	2.03	1	18.8	20	83.2	-	o
2011	4	13	15	26.2	29	18	1015.6	65	0	29.9	8.1	18.3	-
2001	4	14	15	27.3	29	25	-	66	0	0	15	7.4	11.1	-
2002	4	14	15	25.8	27.8	23.3	1014	74	1.02	1	18.7	6.3	22.2	-	o
2003	4	14	15	27.3	29.6	19.6	-	68	2.03	1	25.3	-	-	-
2006	4	14	15	28.3	33.3	24	1011.2	73	0	0	20.1	7.6	16.5	32.4
2007	4	14	15	26.8	30	21.6	1018.4	75	0	0	24.6	5	14.8	28.7
2008	4	14	15	24.2	28	19.6	1014.1	78	0	0	18.3	8.3	14.8	-	o
2009	4	14	15	-	-	-	-	-	-		-	-	-	-	-	-	-	-
2010	4	14	15	-	-	-	-	-	-		-	-	-	-	-	-	-	-
2011	4	14	15	24.7	28.7	18.4	1014.9	71	0	28	5.2	14.8	-
2001	4	15	15	-	-	-	-	-	-		-	-	-	-	-	-	-	-
2002	4	15	15	26.9	29.9	21.7	1015.6	69	4.06	1	21.7	13	18.3	-
2003	4	15	15	27.8	29.2	19.5	1017.1	64	0	0	26.2	-	-	-
2006	4	15	15	26.7	30.6	23.9	1017.7	79	0.51	1	19	7.2	18.3	35.9	o		o
2007	4	15	15	25.7	31.9	21	1015.2	80	0	0	19.2	0	-	39.6
2008	4	15	15	24.2	27.9	20	1014.7	78	3.05	1	16.6	6.5	18.3	25.2	o
2009	4	15	15	-	-	-	-	-	-		-	-	-	-	-	-	-	-
2010	4	15	15	-	-	-	-	-	-		-	-	-	-	-	-	-	-
2011	4	15	15	24.7	27.6	18.3	1012.3	72	0	28.3	2.8	11.1	-
2001	4	16	16	26.2	28.4	20.2	1020	65	0	0	22	9.3	14.8	28.7
2002	4	16	16	24.4	26.2	20.5	1017.4	77	0	0	16.1	10	16.5	32.4	o
2003	4	16	16	-	-	-	-	-	-		-	-	-	-	-	-	-	-
2006	4	16	16	26	28.6	22	1018	69	4.06	1	23.2	10.2	16.5	32.4	o
2007	4	16	16	27.1	31	21.7	1015.4	76	0	0	19	0.9	5.4	35.9
2008	4	16	16	24.1	30.6	18.9	1014	76	0	0	19.5	3.3	14.8	32.4
2009	4	16	16	-	-	-	-	-	-		-	-	-	-	-	-	-	-
2010	4	16	16	27.8	34	22.1	1013.8	79	67.06	1	19.5	14.4	18.3	-	o		o
2011	4	16	16	25.3	28.7	18.5	1014	69	0	27.5	3.7	14.8	-
2001	4	17	16	27.5	28.5	26.5	-	69	0	0	20.6	12	13	-
2002	4	17	16	25.4	27.5	20	1017.9	67	1.02	1	18.8	7.4	13	-	o
2003	4	17	16	-	-	-	-	-	-		-	-	-	-	-	-	-	-
2006	4	17	16	24.5	28.6	21	1013.1	73	0	0	20.1	1.9	11.1	32.4
2007	4	17	16	27.2	30.6	21.1	1016.1	74	0	0	24.6	0.7	5.4	-
2008	4	17	16	25.3	30.7	18	1016.3	72	0	0	17.2	3.3	9.4	35.9
2009	4	17	16	-	-	-	-	-	-		-	-	-	-	-	-	-	-
2010	4	17	16	25.9	29	19.7	1014.1	81	0	0	26.7	5.2	9.4	-			o
2011	4	17	16	27.3	28.5	17.6	1016.1	66	-	24.8	5.6	14.8	-	o
2001	4	18	16	28.3	29.3	27	-	65	0	0	20.6	8.3	13	-
2002	4	18	16	25.8	28	18.9	1014.6	67	3.05	1	26.2	7	11.1	35.9
2003	4	18	16	25.6	28.4	19.3	1016.5	82	5.08	1	26.9	-	-	-
2006	4	18	16	25.3	29	20.6	1015.9	75	0	0	19.2	6.5	18.3	35.9
2007	4	18	16	26.6	29.8	24	1017.3	77	0	0	20.6	4.1	9.4	-
2008	4	18	16	26.4	29	18.5	1016.4	73	0	0	18.5	7	13	35.9
2009	4	18	16	-	-	-	-	-	-		-	-	-	-	-	-	-	-
2010	4	18	16	27.9	30.8	21.4	1012.1	80	0	0	25.3	9.4	18.3	-
2011	4	18	16	24.1	29.2	19.5	1017.9	76	6.1	20.6	12.4	16.5	-	o
2001	4	19	16	26.3	28	24	-	78	0	0	15	1.1	5.4	-
2002	4	19	16	-	-	-	-	-	-		-	-	-	-	-	-	-	-
2003	4	19	16	-	-	-	-	-	-		-	-	-	-	-	-	-	-
2006	4	19	16	24.9	27.3	22.1	1019.8	83	0.76	1	15.1	14.8	22.2	-	o
2007	4	19	16	26.9	30	22.1	1016.2	73	0	0	18.5	7.2	9.4	28.7
2008	4	19	16	26.2	28	18	1012.9	71	0	0	18.3	12.6	16.5	35.9
2009	4	19	16	-	-	-	-	-	-		-	-	-	-	-	-	-	-
2010	4	19	16	-	-	-	-	-	-		-	-	-	-	-	-	-	-
2011	4	19	16	24.6	27	17.6	1017	72	10.92	27.5	-	-	-
2001	4	20	16	26.2	28	24	-	71	0	0	10.6	12.6	16.5	-	o
2002	4	20	16	-	-	-	-	-	-		-	-	-	-	-	-	-	-
2003	4	20	16	26.4	28.3	18	1017.2	64	0.76	1	26.2	-	-	-
2006	4	20	16	25.6	28.2	21	1019.4	72	6.1	1	18	8.1	16.5	-
2007	4	20	16	27.2	31.1	21.8	-	70	0	0	17.4	0.7	9.4	-
2008	4	20	16	27.3	30.3	20	1010	74	0	0	19.3	20.6	24.1	25.2
2009	4	20	16	-	-	-	-	-	-		-	-	-	-	-	-	-	-
2010	4	20	16	-	-	-	-	-	-		-	-	-	-	-	-	-	-
2001	4	21	16	-	-	-	-	-	-		-	-	-	-	-	-	-	-
2002	4	21	16	-	-	-	-	-	-		-	-	-	-	-	-	-	-
2003	4	21	16	-	-	-	-	-	-		-	-	-	-	-	-	-	-
2006	4	21	16	26.7	29.4	20.6	1016	64	0	0	21.7	7.4	13	32.4
2007	4	21	16	25.7	28.3	23	1014.1	83	7.11	1	18	0.7	9.4	28.7	o
2008	4	21	16	24.5	27.3	22	1010.6	82	3.05	1	15.4	14.4	29.4	35.9	o		o
2009	4	21	16	-	-	-	-	-	-		-	-	-	-	-	-	-	-
2010	4	21	16	26.8	28	25	-	72	0	0	14.3	19.1	25.9	-
2001	4	22	16	-	-	-	-	-	-		-	-	-	-	-	-	-	-
2002	4	22	16	26.2	28.4	19.8	-	71	0	0	20.6	8	14.8	35.9
2003	4	22	16	24.6	26	18	1012.1	84	7.87	1	21.7	0	-	10.7	o
2006	4	22	16	26	29.7	21	1013	78	0	0	22.7	6.3	14.8	32.4
2007	4	22	16	26.4	30	21.7	1014.3	78	8.89	1	19.8	5.7	11.1	18
2008	4	22	16	20.9	25	16.2	-	75	0	0	19.3	24.4	29.4	-
2009	4	22	16	-	-	-	-	-	-		-	-	-	-	-	-	-	-
2010	4	22	16	-	-	-	-	-	-		-	-	-	-	-	-	-	-
2001	4	23	17	27.5	28.7	20.4	-	66	0	0	25.3	14.8	22.2	32.4
2002	4	23	17	26.7	28.8	20	1017.4	65	0	0	22	8	14.8	32.4
2003	4	23	17	28.4	31.6	25	-	79	0	0	25.3	-	-	-
2006	4	23	17	27.1	30	20	1011.5	77	0	0	19.2	8.7	14.8	32.4
2007	4	23	17	26.1	28.6	21	1014.9	74	0	0	18.5	10	13	35.9			o
2008	4	23	17	22.6	25.5	16.2	1020.2	74	0	0	18.3	6.1	14.8	28.7
2009	4	23	17	-	-	-	-	-	-		-	-	-	-	-	-	-	-
2010	4	23	17	-	-	-	-	-	-		-	-	-	-	-	-	-	-
2001	4	24	17	-	-	-	-	-	-		-	-	-	-	-	-	-	-
2002	4	24	17	26.8	28	20.4	1016.9	66	0	0	26.2	11.1	16.5	35.9
2003	4	24	17	27.4	30.4	19.3	1016.2	80	0	0	26.2	-	-	-
2006	4	24	17	25.3	27	23	1012.8	77	0.76	1	16.9	17.2	35.2	-	o		o
2007	4	24	17	24.8	27.6	19.5	1013.6	75	0.25	1	19.2	6.9	11.1	18
2008	4	24	17	23.3	27	18.2	1020.5	69	0.25	1	18	5.4	22.2	-
2009	4	24	17	-	-	-	-	-	-		-	-	-	-	-	-	-	-
2010	4	24	17	-	-	-	-	-	-		-	-	-	-	-	-	-	-
2001	4	25	17	27.8	29.5	21	1015.8	66	0	0	29.9	6.9	14.8	35.9
2002	4	25	17	26.6	28.6	19.8	-	64	0	0	20.6	5.6	11.1	-
2003	4	25	17	28.1	30	25	-	75	0	0	19.3	3.3	16.5	-
2006	4	25	17	24.1	27.6	22	1019	76	0	0	17.7	9.6	18.3	-
2007	4	25	17	25.9	28.6	20.3	-	66	0	0	20.6	5.9	13	32.4
2008	4	25	17	23.6	27.7	17.6	1017.9	68	0	0	18.5	3.9	14.8	32.4
2009	4	25	17	-	-	-	-	-	-		-	-	-	-	-	-	-	-
2010	4	25	17	-	-	-	-	-	-		-	-	-	-	-	-	-	-
2001	4	26	17	-	-	-	-	-	-		-	-	-	-	-	-	-	-
2002	4	26	17	26.2	29	19.5	1014.7	58	0	0	23.8	7.4	13	32.4
2003	4	26	17	26.7	29.2	19.7	1020.7	73	0	0	29.9	-	-	-
2006	4	26	17	24.2	28.3	20.4	1020	75	0	0	17.7	8.9	16.5	-
2007	4	26	17	27.2	29.9	21	1010.1	72	0	0	16.3	16.5	22.2	-
2008	4	26	17	24.4	28	18.1	1015.6	68	0	0	17.7	8.9	22.2	35.9
2009	4	26	17	-	-	-	-	-	-		-	-	-	-	-	-	-	-
2010	4	26	17	-	-	-	-	-	-		-	-	-	-	-	-	-	-
2001	4	27	17	26	29	18.4	-	68	0	0	20.6	6.1	9.4	57.6
2002	4	27	17	27.2	29	20.4	-	64	0	0	22.5	7.8	11.1	35.9
2003	4	27	17	-	-	-	-	-	-		-	-	-	-	-	-	-	-
2006	4	27	17	24.3	27.3	20.5	1022.2	75	2.03	1	19.8	11.9	20.6	-	o
2007	4	27	17	28.1	32	22.1	1009.6	73	0	0	19.3	20	24.1	35.9
2008	4	27	17	22.9	28.4	17.4	1016.9	75	0	0	20	1.9	5.4	35.9
2009	4	27	17	-	-	-	-	-	-		-	-	-	-	-	-	-	-
2010	4	27	17	-	-	-	-	-	-		-	-	-	-	-	-	-	-
2001	4	28	17	28.8	30	25	-	72	0	0	11.3	8.5	11.1	-
2002	4	28	17	26.2	29	20.1	1014.9	70	0	0	20.4	4.6	14.8	35.9
2003	4	28	17	26.1	28.4	19	-	71	1.02	1	22.5	-	-	-
2006	4	28	17	23.7	27	20.2	1021.4	70	0	0	18.7	5	14.8	21.7
2007	4	28	17	26.7	32.6	20	1008.6	75	0	0	19.8	11.5	22.2	35.9			o
2008	4	28	17	23.3	27.2	16.9	1016.2	69	0	0	17.2	7.8	18.3	35.9
2009	4	28	17	-	-	-	-	-	-		-	-	-	-	-	-	-	-
2010	4	28	17	-	-	-	-	-	-		-	-	-	-	-	-	-	-
2001	4	29	17	27.8	29.4	19.5	-	73	0	0	25.3	2.8	5.4	35.9
2002	4	29	17	26.3	28.4	19	1015.5	63	0	0	22	5.7	11.1	32.4
2003	4	29	17	27.3	29	24	-	65	0	0	22.5	-	-	-
2006	4	29	17	23.2	28.5	18.6	1016.4	72	0	0	21.2	1.3	9.4	25.2
2007	4	29	17	22.8	25.1	20	1015.5	66	0.76	1	17.2	21.9	25.9	-
2008	4	29	17	24.2	27.2	17.4	1014.9	70	0	0	17.2	4.3	9.4	35.9
2009	4	29	17	-	-	-	-	-	-		-	-	-	-	-	-	-	-
2010	4	29	17	26.8	29.6	19.2	1016.9	67	0	0	20.6	11.1	27.8	-
2001	4	30	18	27.2	28.8	20	1019.1	65	0	0	22	9.1	14.8	61.1
2002	4	30	18	27.2	29.2	20	1016.5	66	0	0	23.8	13.1	18.3	35.9
2003	4	30	18	26.9	29.6	17.5	1016.7	67	0	0	23.8	2.8	11.1	32.4
2006	4	30	18	24.1	29.6	18.4	1016	72	0	0	19.3	3.3	11.1	28.7
2007	4	30	18	23.9	26.5	17.2	1016.2	65	2.03	1	19.2	7.4	11.1	32.4
2008	4	30	18	23.2	26.6	17.8	1014.9	78	0	0	17.1	5.4	11.1	21.7
2009	4	30	18	-	-	-	-	-	-		-	-	-	-	-	-	-	-
2010	4	30	18	26.4	29.3	19.6	1017.2	64	0	0	19	11.5	22.2
2001	5	1	18	26.3	29	20.5	-	66	0	0	18.8	7	14.8	35.9
2002	5	1	18	27	29	20.1	-	62	0	0	26.2	11.5	14.8	32.4
2003	5	1	18	26.9	28	18	-	68	0	0	25.3	-	-	-
2006	5	1	18	24.3	28.3	19.1	1020.6	74	0.25	1	17.2	9.4	20.6	35.9	o
2007	5	1	18	24.2	27	18.4	1020.4	78	0	0	16.6	9.6	16.5	35.9	o
2008	5	1	18	24.7	28	17.4	1014.2	76	0	0	19.8	9.4	18.3	21.7
2009	5	1	18	25.8	28	18.5	-	67	0	0	14.2	24.3	33.5	-
2010	5	1	18	25.4	29.1	18	1016.6	70	0	0	23.2	5.6	16.5	-
2001	5	2	18	24.5	25.6	20.1	1018.7	67	0	0	18.8	13	14.8	35.9	o
2002	5	2	18	26.8	28.5	20.1	1016.1	64	0	0	23.8	6.1	9.4	35.9
2003	5	2	18	26.8	28.4	18.2	-	71	0	0	25.3	-	-	-
2006	5	2	18	23.2	26	22	1020.9	74	0.51	1	13.2	8.3	22.2	-	o
2007	5	2	18	24.8	27.5	20.3	-	75	2.03	1	16.4	10.4	20.6	35.9
2008	5	2	18	23.2	25	17.6	1019.2	78	12.95	1	17.7	15.4	22.2	32.4
2009	5	2	18	25.7	27.6	18.4	1011.7	74	0	0	22	20.4	33.5	-
2010	5	2	18	25.7	29.2	18.2	1017.3	60	0	0	20.6	10	24.1	-
2001	5	3	18	-	-	-	-	-	-		-	-	-	-	-	-	-	-
2002	5	3	18	27.3	29.2	19.8	1017.2	65	0	0	26.2	6.1	7.6	35.9
2003	5	3	18	26.2	28.4	18.6	1019.2	73	0	0	29.9	-	-	-
2006	5	3	18	23.2	27	20.2	1016.3	76	0	0	17.4	3	9.4	-
2007	5	3	18	25.2	28	20.2	1018.9	68	0	0	16.7	7.4	16.5	32.4
2008	5	3	18	22.4	25	16.8	1017.6	69	1.02	1	15.9	5.7	16.5	18
2009	5	3	18	-	-	-	-	-	-		-	-	-	-	-	-	-	-
2010	5	3	18	25.2	28	17.1	1013.6	66	0	0	20.6	4.6	9.4	-
2001	5	4	18	-	-	-	-	-	-		-	-	-	-	-	-	-	-
2002	5	4	18	27.2	29	20	-	64	0	0	18.8	9.3	13	-
2003	5	4	18	-	-	-	-	-	-		-	-	-	-	-	-	-	-
2006	5	4	18	24.9	29.3	19.1	1013.1	76	0	0	18.8	5.4	13	-
2007	5	4	18	25	28.6	19.6	1017.5	71	0	0	17.2	8.5	11.1	35.9	o
2008	5	4	18	23.9	26.8	17.6	1014.2	74	0	0	18.8	9.8	14.8	28.7
2009	5	4	18	-	-	-	-	-	-		-	-	-	-	-	-	-	-
2010	5	4	18	25.2	30.4	17.4	1009.5	73	0	0	22.2	9.3	18.3	-
2001	5	5	18	27.4	29.4	24	-	66	0	0	22.5	9.3	11.1	-
2002	5	5	18	26.3	28.2	19.5	-	65	0	0	25.3	4.3	9.4	35.9
2003	5	5	18	26.9	30.2	16.6	1014.6	71	0	0	21.6	2.8	11.1	18
2006	5	5	18	25.3	30	20.5	1014	76	0	0	18.2	0.6	7.6	35.9
2007	5	5	18	-	-	-	-	-	-		-	-	-	-	-	-	-	-
2008	5	5	18	26.8	29	20.4	1014.4	77	0	0	20.9	13.5	20.6	-	o		o
2009	5	5	18	24.5	28.4	20.1	-	84	9.91	1	20.4	8.5	13	-
2010	5	5	18	29.3	33	19.6	-	68	0	0	15	11.7	24.1	-
2001	5	6	18	24.6	25.4	24	-	64	0	0	15.9	23.5	27.8	-
2002	5	6	18	26.8	28.2	20	1011.8	69	0	0	22	12.8	16.5	35.9
2003	5	6	18	27.3	28.2	26	-	70	0	0	25.3	-	-	-
2006	5	6	18	25.8	29.6	21	1012.3	80	0	0	19	10.9	20.6	32.4
2007	5	6	18	-	-	-	-	-	-		-	-	-	-	-	-	-	-
2008	5	6	18	24.9	29	21	1015.2	78	0	0	17.5	6.7	14.8	35.9
2009	5	6	18	-	-	-	-	-	-		-	-	-	-	-	-	-	-
2010	5	6	18	27.7	31.9	21.1	1013	79	0	0	23.2	8.3	11.1	-
2001	5	7	19	24.2	27	13.5	1016.6	63	0	0	20	5	18.3	32.4
2002	5	7	19	25.8	27.8	19.8	1014.1	57	0	0	18.7	13.7	16.5	35.9
2003	5	7	19	26.2	28.2	19	-	64	2.03	1	25.3	-	-	-
2006	5	7	19	23.4	25	21	1013.9	85	0	0	19.8	12.2	20.6	32.4	o		o
2007	5	7	19	24.8	28	19.3	1018.7	70	0	0	19	8.1	13	28.7
2008	5	7	19	23.7	27.3	18.3	1016.1	73	0	0	18.8	4.1	9.4	25.2
2009	5	7	19	-	-	-	-	-	-		-	-	-	-	-	-	-	-
2010	5	7	19	27.4	29.8	21.2	1014	80	0	0	20.4	13.9	25.9	-
2001	5	8	19	24.9	28.2	16.5	-	67	0	0	-	9.6	16.5	35.9
2002	5	8	19	24.9	27	17.7	-	53	0	0	22.5	4.3	5.4	32.4
2003	5	8	19	25.6	27.4	18	1017.6	77	2.03	1	26.2	-	-	-
2006	5	8	19	21.4	24.2	18.5	1017.8	78	0.76	1	16.6	13.3	18.3	-	o		o
2007	5	8	19	25.7	28.8	18.1	1018.8	66	0	0	18.8	5.6	9.4	32.4
2008	5	8	19	23.9	27	19.4	1016.6	76	0	0	17.4	9.3	13	-
2009	5	8	19	-	-	-	-	-	-		-	-	-	-	-	-	-	-
2010	5	8	19	25.2	30.6	22.8	1016.8	81	3.05	1	20.1	4.8	22.2	-	o		o
2001	5	9	19	25.3	28	17	-	61	0	0	22.5	8.1	11.1	35.9
2002	5	9	19	24.3	27	18.2	1020.7	58	0	0	18.8	8	24.1	32.4
2003	5	9	19	-	-	-	-	-	-		-	-	-	-	-	-	-	-
2006	5	9	19	19.8	23.6	18	1016	77	2.03	1	15.3	16.3	24.1	28.7	o		o
2007	5	9	19	25.5	29	18.9	1018.2	71	0	0	20.4	3	7.6	32.4
2008	5	9	19	23.8	27.7	21	1014.6	82	0	0	17.7	4.1	9.4	-
2009	5	9	19	25.3	27.2	19.3	1017.2	66	0	0	29.9	10.6	14.8	-
2010	5	9	19	25.5	28.8	18.5	1014.6	78	0	0	17.5	6.5	22.2	-
2001	5	10	19	24.9	28.5	20	-	66	0	0	16.6	8.9	11.1	-
2002	5	10	19	24.6	27.2	18.6	1021.8	58	0	0	23.8	14.1	22.2	25.2
2003	5	10	19	-	-	-	-	-	-		-	-	-	-	-	-	-	-
2006	5	10	19	18.8	21	15.2	1012.6	83	0	0	15.9	25.4	33.5	-	o
2007	5	10	19	25.2	30.1	18.6	1018.5	77	0	0	18.8	5	11.1	32.4
2008	5	10	19	25.3	28.3	18.9	1012.9	79	0	0	19.8	4.8	14.8	25.2
2009	5	10	19	-	-	-	-	-	-		-	-	-	-	-	-	-	-
2010	5	10	19	27.2	30.2	20.7	1009.9	78	0	0	20.4	15.6	27.8	-
2001	5	11	19	-	-	-	-	-	-		-	-	-	-	-	-	-	-
2002	5	11	19	24.3	26.4	21	-	66	0	0	20.6	9.4	18.3	-
2003	5	11	19	-	-	-	-	-	-		-	-	-	-	-	-	-	-
2006	5	11	19	21.9	25.2	17.4	1013.9	83	3.05	1	18.8	13.1	18.3	-
2007	5	11	19	25.4	30	20.2	1022.2	68	0.51	1	18.5	11.5	18.3	35.9
2008	5	11	19	26.2	30	20.4	1011.4	79	0	0	16.7	14.1	22.2	35.9
2009	5	11	19	23.3	25	16.3	1017.7	69	4.06	1	19.8	15.7	27.8	-	o
2010	5	11	19	28.8	33.8	20.7	1008.5	70	0	0	20.3	12.4	22.2	-			o
2001	5	12	19	26.1	27.4	20.4	-	64	0	0	22	20	24.1	35.9	o
2002	5	12	19	26.5	29.8	24	-	56	0	0	18.8	8	9.4	-
2003	5	12	19	27	28.7	18.5	1011.4	75	0	0	29.9	-	-	-
2006	5	12	19	23.3	27	18	1016.4	77	0	0	18.3	5	13	-
2007	5	12	19	23.7	28	17.8	1020.2	75	0	0	18.3	3.5	9.4	25.2
2008	5	12	19	24.7	28	19.9	-	85	0	0	16.7	8.1	11.1	35.9
2009	5	12	19	-	-	-	-	-	-		-	-	-	-	-	-	-	-
2010	5	12	19	26.7	29	20.5	1016.3	78	3.05	1	21.4	15.9	27.8	-
2001	5	13	19	-	-	-	-	-	-		-	-	-	-	-	-	-	-
2002	5	13	19	23.5	27	17.6	-	70	0	0	25.3	2.8	5.4	35.9
2003	5	13	19	25	28	13.5	1014.8	71	0	0	26.2	-	-	-
2006	5	13	19	23.2	27.4	17.9	1016.4	80	0	0	17.7	2.6	9.4	-	o
2007	5	13	19	24.8	28	18.3	1018.7	76	0	0	18.2	2.8	11.1	32.4
2008	5	13	19	27.3	30.4	22.5	1015	77	0	0	18.8	5.4	9.4	-
2009	5	13	19	23.8	26.2	16.1	1023.4	63	0	0	20.6	11.7	22.2	-
2010	5	13	19	25.8	28.1	20.6	1021.1	70	0	0	22.2	14.4	25.9	-
2001	5	14	20	-	-	-	-	-	-		-	-	-	-	-	-	-	-
2002	5	14	20	24.9	29.2	17	-	55	0	0	17.4	3.9	14.8	35.9
2003	5	14	20	23.7	27.8	22	-	85	3.05	1	17.7	-	-	-	o
2006	5	14	20	23.3	28	18.5	1016.6	78	0	0	16.9	2.8	13	21.7
2007	5	14	20	25.2	28	19.6	1016.8	70	0	0	21.1	20.4	84.8	-
2008	5	14	20	24.6	27.2	21.2	1020.9	76	0	0	19.2	10.7	18.3	35.9
2009	5	14	20	-	-	-	-	-	-		-	-	-	-	-	-	-	-
2010	5	14	20	25.7	28.2	19.6	1020.7	69	0	0	19.8	12.6	22.2	-
2001	5	15	20	23.5	25.5	19.3	1020.4	77	3.05	1	29.9	4.1	14.8	21.7
2002	5	15	20	25.2	26.6	18	1022.2	61	0	0	20.6	8.9	18.3	35.9
2003	5	15	20	24.6	25.4	18.5	-	61	10.92	1	25.3	-	-	-
2006	5	15	20	22.9	29	18	1015.4	81	0	0	16.4	1.5	11.1	35.9
2007	5	15	20	26.1	30.2	19.4	1013	73	0	0	18.2	9.1	13	35.9
2008	5	15	20	24.4	27.7	19.4	1022.1	73	0	0	18.3	6.9	14.8	21.7
2009	5	15	20	24.3	26.6	16.3	1017.2	63	0	0	20.6	7.2	13	-
2010	5	15	20	24.3	27.2	17.3	1021	69	0	0	22.7	10	20.6	-
2001	5	16	20	-	-	-	-	-	-		-	-	-	-	-	-	-	-
2002	5	16	20	25.3	27	19.4	1021.2	55	0.25	1	24.6	7.4	11.1	-
2003	5	16	20	-	-	-	-	-	-		-	-	-	-	-	-	-	-
2006	5	16	20	22.3	29	17.8	1015.5	83	0	0	17.7	0.4	5.4	35.9
2007	5	16	20	25.5	29	19.6	1017.9	78	0	0	18.8	4.6	14.8	35.9
2008	5	16	20	-	-	-	-	-	-		-	-	-	-	-	-	-	-
2009	5	16	20	23.3	26.5	15.9	1014.2	70	0	0	28	7.8	14.8	-
2010	5	16	20	23.9	26.6	21.8	1023.1	70	0	0	19.5	14.3	20.6	-	o
2001	5	17	20	23.9	26.2	19	1022.8	76	0	0	29.9	3.7	7.6	21.7
2002	5	17	20	23.8	26.4	16.9	1020.9	67	0	0	23.5	6.7	14.8	35.9
2003	5	17	20	-	-	-	-	-	-		-	-	-	-	-	-	-	-
2006	5	17	20	23.9	28	17.4	1014.8	77	0	0	16.9	6.5	13	28.7
2007	5	17	20	25.7	29.8	20.4	1017.3	78	0	0	27.2	4.8	11.1	21.7
2008	5	17	20	-	-	-	-	-	-		-	-	-	-	-	-	-	-
2009	5	17	20	25.9	30.1	16.6	1009.7	70	0	0	25.3	23.3	35.9	-
2010	5	17	20	24.3	26.7	19.1	1020.9	68	0	0	26.7	14.1	16.5	-
2001	5	18	20	-	-	-	-	-	-		-	-	-	-	-	-	-	-
2002	5	18	20	24.3	26	18	-	65	0	0	25.3	6.1	13	28.7
2003	5	18	20	-	-	-	-	-	-		-	-	-	-	-	-	-	-
2006	5	18	20	25.2	30.5	19	1009.4	70	0	0	22.2	11.3	14.8	35.9
2007	5	18	20	23.2	26	19.4	1018.8	83	17.02	1	11.6	1.7	7.6	28.7	o		o
2008	5	18	20	-	-	-	-	-	-		-	-	-	-	-	-	-	-
2009	5	18	20	24.6	27	18.7	-	73	0	0	19	17.2	27.8	-
2010	5	18	20	25.2	28.3	18.4	1018.1	79	10.92	1	18.2	14.1	27.8	-	o
2001	5	19	20	24.2	27.8	15.1	-	69	0	0	-	-	-	-
2002	5	19	20	24.4	26.2	18.8	1025.3	68	0	0	22	10.2	14.8	-
2003	5	19	20	-	-	-	-	-	-		-	-	-	-	-	-	-	-
2006	5	19	20	25.3	30.2	20.4	1003.8	76	3.05	1	16.9	9.8	24.1	32.4	o		o
2007	5	19	20	25.4	28	19.1	1015.4	72	2.03	1	19.6	6.5	11.1	18
2008	5	19	20	-	-	-	-	-	-		-	-	-	-	-	-	-	-
2009	5	19	20	-	-	-	-	-	-		-	-	-	-	-	-	-	-
2010	5	19	20	25.7	28	18.8	1018.2	72	0	0	17.7	13.9	27.8	-
2001	5	20	20	25.5	27.4	18.2	-	69	0	0	18.3	8.9	14.8	35.9
2002	5	20	20	25.3	27	22	-	64	0	0	18.3	10.2	14.8	-
2003	5	20	20	25.6	26.3	24	-	71	0	0	25.3	-	-	-
2006	5	20	20	24.3	30.3	18.4	1003.6	63	0	0	17.7	1.1	5.4	28.7
2007	5	20	20	25.1	29	20.4	1008.7	74	0	0	19.6	15.2	24.1	32.4
2008	5	20	20	24.9	26	18.4	-	56	0	0	25.3	13	18.3	32.4
2009	5	20	20	24.3	26.8	16.7	1023.5	65	0	0	21.7	16.5	24.1	-
2010	5	20	20	25.8	28.6	18.9	1018.7	78	0	0	19.8	5.9	18.3	-
2001	5	21	21	26.3	29	19.1	-	69	0	0	17.7	10.9	18.3	35.9
2002	5	21	21	25.1	28	18.5	-	68	0	0	20.6	10.2	18.3	32.4
2003	5	21	21	24.7	27	16.5	1022.4	79	0	0	29.9	-	-	-
2006	5	21	21	22.5	26.5	19.9	1014.9	71	0	0	17.2	9.8	18.3	-
2007	5	21	21	26.7	30.2	21.6	1004.4	70	0	0	20.6	15	20.6	35.9
2008	5	21	21	20.9	22	17.8	-	86	2.03	1	14.3	3.7	9.4	32.4	o
2009	5	21	21	22.6	24.9	18.2	1023	78	6.1	1	14.3	17	29.4	-	o
2010	5	21	21	26.4	29	20	1018.1	72	0	0	18.2	18.7	33.5	-
2001	5	22	21	25.1	28.1	19.5	1014.6	78	0	0	25.9	8.5	14.8	35.9
2002	5	22	21	25.4	27.6	19.6	-	69	0	0	19.3	17.8	24.1	32.4
2003	5	22	21	24.1	27	17.5	1021.3	83	0	0	23.8	0	-	28.7
2006	5	22	21	20.4	26.4	16.7	1020.2	77	0.51	1	16.1	5.2	14.8	32.4	o
2007	5	22	21	20.1	22.6	16.4	1011.7	46	0	0	16.9	19.4	24.1	32.4
2008	5	22	21	-	-	-	-	-	-		-	-	-	-	-	-	-	-
2009	5	22	21	22.8	25.6	17.8	1020.9	80	7.87	1	18.7	8.3	16.5	-	o
2010	5	22	21	24.7	27	20	-	83	1.02	1	11.6	17.2	20.6	-	o		o
2001	5	23	21	25.4	27	20	1018.7	76	0	0	29.9	6.7	14.8	32.4
2002	5	23	21	26.9	28.8	20.4	1012.6	74	0	0	23.5	19.8	24.1	32.4
2003	5	23	21	-	-	-	-	-	-		-	-	-	-	-	-	-	-
2006	5	23	21	21.3	26.6	16	1021.7	76	2.03	1	17.7	1.9	9.4	14.4
2007	5	23	21	19.9	23	12.9	1017.5	70	0	0	18.5	10.7	13	32.4
2008	5	23	21	-	-	-	-	-	-		-	-	-	-	-	-	-	-
2009	5	23	21	23.2	25.1	19.5	-	77	0	0	18.2	6.5	18.3	-
2010	5	23	21	22.8	24	19.6	1016.3	88	16	1	12.9	11.5	20.6	-	o
2001	5	24	21	25.6	27	20.1	1021.2	68	0	0	21.6	9.1	14.8	25.2
2002	5	24	21	26.9	29.4	20.9	1011.8	69	0	0	22	8.9	11.1	35.9
2003	5	24	21	22.8	27.9	15.9	1016.6	83	0	0	25.9	0	-	32.4
2006	5	24	21	21.4	25.8	17	1022.3	72	0	0	17.1	7.2	18.3	32.4
2007	5	24	21	20.1	25.2	12.6	1020.9	61	0	0	20.4	6.1	9.4	32.4
2008	5	24	21	-	-	-	-	-	-		-	-	-	-	-	-	-	-
2009	5	24	21	-	-	-	-	-	-		-	-	-	-	-	-	-	-
2010	5	24	21	25.3	27	18.8	1015.6	69	14.99	1	20.6	13.7	25.9	-
2001	5	25	21	24.9	26.8	20	-	71	0	0	21.2	8.3	14.8	32.4
2002	5	25	21	27.5	29	26	-	76	0	0	18.8	12.6	14.8	-
2003	5	25	21	-	-	-	-	-	-		-	-	-	-	-	-	-	-
2006	5	25	21	21.3	26	16.9	1020.5	74	0	0	18	9.3	16.5	18
2007	5	25	21	21.7	25	13.3	-	53	0	0	16.7	3	13	32.4
2008	5	25	21	-	-	-	-	-	-		-	-	-	-	-	-	-	-
2009	5	25	21	-	-	-	-	-	-		-	-	-	-	-	-	-	-
2010	5	25	21	22.8	27	17.2	1016.2	81	0	0	20.6	5	16.5	-	o
2001	5	26	21	-	-	-	-	-	-		-	-	-	-	-	-	-	-
2002	5	26	21	-	-	-	-	-	-		-	-	-	-	-	-	-	-
2003	5	26	21	-	-	-	-	-	-		-	-	-	-	-	-	-	-
2006	5	26	21	21.7	27	14.4	1018.4	67	0	0	15.4	4.1	9.4	32.4
2007	5	26	21	20.7	25.6	14.3	1024	67	0.51	1	19.6	4.6	11.1	35.9	o
2008	5	26	21	23.5	26	17.4	-	71	0.51	1	20.1	5.6	9.4	18	o
2009	5	26	21	23.6	27	17.3	1015.1	71	0	0	24.3	7.8	18.3	-
2010	5	26	21	24.4	27.7	17.5	1016.8	71	0	0	21.4	8.1	22.2	-
2001	5	27	21	23.7	26.6	19	-	76	0	0	20	-	-	-
2002	5	27	21	-	-	-	-	-	-		-	-	-	-	-	-	-	-
2003	5	27	21	26.6	29.4	17.1	1012	54	0	0	24	-	-	-
2006	5	27	21	23.6	30.5	17.6	1015.4	72	0	0	16.6	14.4	27.8	35.9
2007	5	27	21	-	-	-	-	-	-		-	-	-	-	-	-	-	-
2008	5	27	21	-	-	-	-	-	-		-	-	-	-	-	-	-	-
2009	5	27	21	24.4	26.5	17.9	1015.9	68	0	0	29.9	7.4	18.3	-
2010	5	27	21	24.8	27.8	17.2	1015.5	70	0	0	20.6	5.9	14.8	-
2001	5	28	22	24.3	25.2	23.3	1026.9	70	0.25	1	20	19.8	29.4	40.7
2002	5	28	22	-	-	-	-	-	-		-	-	-	-	-	-	-	-
2003	5	28	22	23.9	25.6	18.5	1017.9	67	0	0	29.9	-	-	-
2006	5	28	22	24.5	29.4	18	1017.2	74	0	0	19.6	7.4	13	35.9
2007	5	28	22	-	-	-	-	-	-		-	-	-	-	-	-	-	-
2008	5	28	22	-	-	-	-	-	-		-	-	-	-	-	-	-	-
2009	5	28	22	-	-	-	-	-	-		-	-	-	-	-	-	-	-
2010	5	28	22	25.9	28.5	18.2	-	56	0	0	20.4	14.1	18.3	-
2001	5	29	22	-	-	-	-	-	-		-	-	-	-	-	-	-	-
2002	5	29	22	-	-	-	-	-	-		-	-	-	-	-	-	-	-
2003	5	29	22	-	-	-	-	-	-		-	-	-	-	-	-	-	-
2006	5	29	22	22.9	27	18.6	1023.1	78	0	0	18.2	9.8	20.6	35.9
2007	5	29	22	20.6	26.7	19.4	-	74	0	0	16.6	0	-	-
2008	5	29	22	-	-	-	-	-	-		-	-	-	-	-	-	-	-
2009	5	29	22	24	26.4	20	1014	69	0	0	24.3	8.1	13	-
2010	5	29	22	23.9	25.5	17.3	1019	72	0	0	17.7	22.4	37	-	o
2001	5	30	22	25.2	28.2	17.7	-	60	0	0	24.9	5.2	13	-
2002	5	30	22	-	-	-	-	-	-		-	-	-	-	-	-	-	-
2003	5	30	22	24.4	27.2	21	-	68	0	0	20.6	-	-	-
2006	5	30	22	23.5	26	19.4	1023.5	65	0	0	20.6	11.9	18.3	25.2
2007	5	30	22	23.7	28.2	15.5	1017	70	0	0	14.8	2	7.6	32.4
2008	5	30	22	-	-	-	-	-	-		-	-	-	-	-	-	-	-
2009	5	30	22	25.4	30.5	16.5	1011.2	68	0	0	20.9	9.6	13	-
2010	5	30	22	23.3	26	17.7	1022.2	69	0	0	21.6	16.5	33.5	-	o
2001	5	31	22	23.1	27.7	18.6	-	69	0	0	29.1	4.8	7.6	28.7
2002	5	31	22	-	-	-	-	-	-		-	-	-	-	-	-	-	-
2003	5	31	22	21.8	25.4	15	1023.4	74	0	0	26.2
2006	5	31	22	21	27.3	16	1023.6	84	9.91	1	15.3	7.8	14.8	35.9
2007	5	31	22	23.6	28.9	16.9	1016.9	67	0	0	20.1	4.3	9.4	35.9
2008	5	31	22	-	-	-	-	-	-		-	-	-	-
2009	5	31	22	25.2	27.2	17.3	1010.8	68	0	0	24.9	7.4	16.5
2010	5	31	22	22.7	25	16.6	1021.1	74	0	0	19	15.7	37
2001	6	1	22	-	-	-	-	-	-		-	-	-	-	-	-	-	-
2002	6	1	22	-	-	-	-	-	-		-	-	-	-	-	-	-	-
2003	6	1	22	-	-	-	-	-	-		-	-	-	-	-	-	-	-
2006	6	1	22	23.1	26.2	18.5	1022	81	0	0	17.4	4.1	13	-	o
2007	6	1	22	24	27	16.8	1021.4	69	0	0	18.2	10.2	18.3	35.9
2008	6	1	22	-	-	-	-	-	-		-	-	-	-	-	-	-	-
2009	6	1	22	24.6	29	17.2	1010.8	54	0	0	28	35.2	-	-
2010	6	1	22	22.9	26	16.7	1020	75	6.1	1	19.3	13	24.1	-	o
2001	6	2	22	-	-	-	-	-	-		-	-	-	-	-	-	-	-
2002	6	2	22	-	-	-	-	-	-		-	-	-	-	-	-	-	-
2003	6	2	22	23.7	26.8	20	-	66	0	0	15.6	-	-	-
2006	6	2	22	23.2	27.7	19.1	1017.8	83	1.02	1	17.4	2.2	9.4	-
2007	6	2	22	22.5	26.5	21	1021.9	78	11.94	1	16.9	17.2	22.2	-	o
2008	6	2	22	-	-	-	-	-	-		-	-	-	-	-	-	-	-
2009	6	2	22	24.3	26.6	16.2	1016.6	64	0	0	25.9	13	18.3	-
2010	6	2	22	22.1	24.3	16.4	1020.5	77	0	0	16.4	16.1	24.1	-	o
2001	6	3	22	-	-	-	-	-	-		-	-	-	-	-	-	-	-
2002	6	3	22	23	24	18.5	1024.8	58	1.02	1	19.6	16.5	22.2	-
2003	6	3	22	24.4	27.3	15.8	1014.4	67	0	0	24.3	-	-	-
2006	6	3	22	22	26	18.5	1020.1	79	0	0	17.2	11.9	27.8	32.4	o
2007	6	3	22	22.2	25.2	18	1020.6	82	35.05	1	15.1	13.3	20.6	-	o
2008	6	3	22	-	-	-	-	-	-		-	-	-	-	-	-	-	-
2009	6	3	22	24	27.4	16	1018.4	74	0	0	25.3	13	27.8	-
2010	6	3	22	22.2	24.6	16	1020.9	73	8.89	1	19.2	8.3	22.2	-	o
2001	6	4	23	22.6	26.6	17.5	-	77	0	0	20	4.1	5.4	32.4
2002	6	4	23	20.6	24.7	15.5	1024.1	67	0	0	23.2	6.3	14.8	32.4
2003	6	4	23	25.8	27.4	15	-	63	0	0	25.3	-	-	-
2006	6	4	23	20.3	23	16.8	1023.3	75	6.1	1	17.4	17.6	25.9	-	o
2007	6	4	23	23.2	26.6	18.2	1018.8	75	0	0	17.7	9.6	22.2	-
2008	6	4	23	23	26.9	17.5	1017.7	78	0	0	21.2	7.8	14.8	25.2
2009	6	4	23	23	26.5	15.9	1017.9	81	0	0	27.5	13	22.2	-
2010	6	4	23	22.7	26	15	1020.8	66	0	0	18.8	0.6	5.4	-
2001	6	5	23	24.1	27.2	15.1	1023	72	0	0	21.6	5	11.1	32.4
2002	6	5	23	20.8	23	16.6	1023	81	2.03	1	15	5.2	11.1	25.2	o
2003	6	5	23	23.4	27	14.5	1017.4	73	0	0	20.3	0	-	32.4	o
2006	6	5	23	20.1	23	17	1021.4	81	1.02	1	15.8	12.2	18.3	32.4	o
2007	6	5	23	23.6	27.2	16.6	1016.8	75	0	0	15.4	5.6	13	18
2008	6	5	23	21	24.5	11.1	-	79	1.02	1	17.5	11.5	22.2	32.4	o
2009	6	5	23	22.4	25.5	16	-	72	0	0	20	2.8	5.4	-
2010	6	5	23	24	26.5	15.5	1019.2	62	0	0	18.7	6.5	16.5	-
2001	6	6	23	-	-	-	-	-	-		-	-	-	-	-	-	-	-
2002	6	6	23	21.6	24.2	18.5	1021.9	79	5.08	1	19.3	2.6	9.4	10.7	o
2003	6	6	23	25.8	27.8	16.5	-	61	0	0	22.5	-	-	-
2006	6	6	23	22.7	25.5	17.4	1021.3	80	6.1	1	18.2	14.3	22.2	25.2	o
2007	6	6	23	25.2	27.5	18	1011.6	77	0	0	18.8	17.2	24.1	32.4
2008	6	6	23	22.6	26	16	1018.3	69	1.02	1	19.6	1.7	7.6	21.7
2009	6	6	23	-	-	-	-	-	-		-	-	-	-	-	-	-	-
2010	6	6	23	23.3	27.3	14.4	1021.4	69	0	0	21.6	3.5	14.8	-
2001	6	7	23	-	-	-	-	-	-		-	-	-	-	-	-	-	-
2002	6	7	23	23.2	25.4	17	1022.7	63	1.02	1	26.2	4.8	7.6	14.4
2003	6	7	23	25.2	29	18	-	74	0	0	22.5	-	-	-
2006	6	7	23	23.9	26.5	19	1019.6	84	2.03	1	13.8	12.2	20.6	25.2	o
2007	6	7	23	23.7	26.2	19.2	1011.8	76	0	0	18.2	3.9	9.4	32.4
2008	6	7	23	22.4	27	17	1016	71	0	0	17.4	2.6	5.4	-
2009	6	7	23	-	-	-	-	-	-		-	-	-	-	-	-	-	-
2010	6	7	23	23.8	26.5	14.9	-	71	0	0	16.4	8.7	18.3	-
2001	6	8	23	23.1	24	16	-	70	0	0	-	-	-	-
2002	6	8	23	23.6	26.4	16.6	-	68	0	0	19.3	5.2	7.6	32.4
2003	6	8	23	25.3	26	23.5	-	61	0	0	25.3	-	-	-
2006	6	8	23	23.6	26.7	20.1	1017.9	86	7.11	1	18.8	5.4	18.3	21.7	o		o
2007	6	8	23	25.1	27.1	13.9	1010.6	62	0	0	20.3	6.1	7.6	14.4
2008	6	8	23	22.2	26.1	17	1020.4	73	0	0	21.4	8	22.2	35.9
2009	6	8	23	25.7	27	23	-	67	0	0	11.3	32.4	40.7	-
2010	6	8	23	24.8	27.2	15.8	1018.5	70	0	0	18	18.5	37	-
2001	6	9	23	-	-	-	-	-	-		-	-	-	-	-	-	-	-
2002	6	9	23	25.5	29	18.2	1018.5	63	0	0	20.4	1.7	7.6	32.4
2003	6	9	23	-	-	-	-	-	-		-	-	-	-	-	-	-	-
2006	6	9	23	23.7	28	19.9	1016.4	82	0.76	1	19.3	4.6	14.8	-
2007	6	9	23	21.9	27	13.4	1013.9	63	0	0	19.3	2.6	9.4	35.9
2008	6	9	23	21.8	24.8	16.9	1025.9	72	0	0	17.4	13.1	25.9	28.7
2009	6	9	23	23.8	25.2	18.8	1026.5	68	12.95	1	23.2	33.7	46.5	-
2010	6	9	23	24.9	28.8	17	1017.4	75	0	0	21.4	8.9	18.3	-
2001	6	10	23	23.2	25	17.5	-	66	0	0	21.6	7.4	14.8	-
2002	6	10	23	24.3	26.4	18	1022	69	0	0	19.6	4.3	14.8	32.4
2003	6	10	23	-	-	-	-	-	-		-	-	-	-	-	-	-	-
2006	6	10	23	25.8	27	24	-	71	0	0	17.5	3.1	9.4	-
2007	6	10	23	23	27.3	14.4	1016.7	74	0	0	17.4	9.1	16.5	35.9
2008	6	10	23	21.6	24.1	17.3	1026.3	59	0.51	1	17.7	13.3	24.1	25.2	o
2009	6	10	23	23.2	25	18.1	1024	69	2.03	1	19.8	20.9	37	-
2010	6	10	23	24.2	27	17.3	1021.9	75	0	0	22.7	8.9	18.3	-
2001	6	11	23	23.8	25	16.5	-	71	0	0	20	8.9	9.4	25.2
2002	6	11	23	23.1	25.6	18.5	1022.7	72	0	0	20.6	8.7	14.8	28.7
2003	6	11	23	-	-	-	-	-	-		-	-	-	-	-	-	-	-
2006	6	11	23	-	-	-	-	-	-		-	-	-	-	-	-	-	-
2007	6	11	23	23.8	27.8	16.6	1017.7	74	0	0	18.2	11.1	27.8	35.9
2008	6	11	23	20.4	25.3	13.2	1023.1	72	0	0	19.3	2.6	7.6	32.4
2009	6	11	23	22.8	26	17.8	1019.5	80	0	0	20.6	2	18.3	-
2010	6	11	23	24.8	26.8	17.5	1021.9	71	0	0	18.8	9.6	18.3	-
2001	6	12	24	22.1	24.8	16.6	-	-	0	0	28.5	5.9	7.6	14.4
2002	6	12	24	24.7	26	18.6	-	67	2.03	1	19.3	5.6	7.6	32.4
2003	6	12	24	-	-	-	-	-	-		-	-	-	-	-	-	-	-
2006	6	12	24	26.2	28	22	-	77	0	0	14.8	10.4	18.3	-
2007	6	12	24	23.8	27.2	17.4	1018	71	0	0	20.6	9.6	18.3	35.9
2008	6	12	24	21.6	26	12.2	1021.5	71	0	0	17.4	3.3	14.8	25.2
2009	6	12	24	23.1	28.2	16.9	1018.1	77	0	0	19.6	4.4	14.8	-
2010	6	12	24	25.2	27	22	-	73	0	0	14	4.8	9.4	-
2001	6	13	24	24.3	25.4	18.8	-	61	0.51	1	24.9	14.8	22.2	28.7
2002	6	13	24	25	28	18.5	1020.6	73	0	0	21.7	8.9	14.8	25.2
2003	6	13	24	-	-	-	-	-	-		-	-	-	-	-	-	-	-
2006	6	13	24	24.8	29.1	19.3	1013.5	80	0	0	20	11.5	18.3	32.4
2007	6	13	24	23.9	27.2	15.8	1018.6	67	0	0	20.3	0.9	5.4	7.2
2008	6	13	24	21.4	27	15.1	1022.7	66	0	0	18	3.5	7.6	-
2009	6	13	24	22.2	25.3	17	1020	84	0	0	24.9	2.8	11.1	-
2010	6	13	24	25.3	28	17.5	1016.6	71	0	0	19.6	10.7	18.3	-
2001	6	14	24	22.3	25.5	16.5	1024.7	75	0	0	24.9	9.1	11.1	32.4
2002	6	14	24	25.5	28	19.7	-	69	0	0	18.3	20.2	29.4	32.4
2003	6	14	24	-	-	-	-	-	-		-	-	-	-	-	-	-	-
2006	6	14	24	24.9	29.5	21.5	1012.9	81	0	0	22.2	7.2	13	-
2007	6	14	24	23.6	28	16.2	1018.6	74	0	0	16.7	6.1	11.1	14.4
2008	6	14	24	21.9	26	15	1023	67	0	0	19.2	3.5	5.4	35.9
2009	6	14	24	24.2	27.2	17.5	1019.6	79	0	0	24.3	8.1	13	-
2010	6	14	24	25.3	29.6	17.1	1013.7	73	0	0	21.4	15.7	24.1	-
2001	6	15	24	21.6	26.4	15.3	1023.5	78	0	0	21.4	4.1	11.1	32.4
2002	6	15	24	23.9	26	18.8	1019.3	66	0	0	22	10	13	32.4
2003	6	15	24	-	-	-	-	-	-		-	-	-	-	-	-	-	-
2006	6	15	24	23.8	27	20.3	1019.2	77	0	0	20.6	11.9	18.3	-
2007	6	15	24	23.1	28.8	17	1018.2	69	0	0	21.4	5.4	14.8	-
2008	6	15	24	22.8	27	15	1021.2	73	0	0	19	4.6	14.8	32.4
2009	6	15	24	23.4	26.7	17.8	-	81	0	0	19.2	5.4	18.3	-
2010	6	15	24	26.8	29.1	23.6	-	71	0	0	18.2	24.1	27.8	-
2001	6	16	24	-	-	-	-	-	-		-	-	-	-	-	-	-	-
2002	6	16	24	22.7	26.2	16.2	1021.6	63	0	0	23.8	7.8	18.3	28.7
2003	6	16	24	-	-	-	-	-	-		-	-	-	-	-	-	-	-
2006	6	16	24	21.8	26.6	17.6	1022.7	80	0	0	20	7.6	13	25.2
2007	6	16	24	23	26.6	17.5	1023.8	66	0	0	20.8	8.7	14.8	-
2008	6	16	24	24	27	16.2	1021.3	72	0	0	19.2	13.5	25.9	28.7
2009	6	16	24	23.2	26.8	17.3	1018.2	76	0	0	23.2	5.7	22.2	-
2010	6	16	24	22.3	24	17.2	1021	54	0	0	20.6	22	33.5	-
2001	6	17	24	-	-	-	-	-	-		-	-	-	-	-	-	-	-
2002	6	17	24	22.9	26.2	18	1024.3	65	0	0	23	10.4	18.3	35.9
2003	6	17	24	-	-	-	-	-	-		-	-	-	-	-	-	-	-
2006	6	17	24	21.5	24.5	18	1022.3	79	1.02	1	17.5	3.7	7.6	25.2	o
2007	6	17	24	22.6	27.3	16.6	1022.4	63	0	0	19	1.5	9.4	14.4
2008	6	17	24	21.8	25.3	17.4	1024.1	76	3.05	1	18	4.4	13	32.4
2009	6	17	24	21.9	27.1	16.2	1019.5	74	0	0	17.2	6.7	14.8	-
2010	6	17	24	20.9	23	14.1	-	60	0	0	18.3	27.8	37	-
2001	6	18	24	-	-	-	-	-	-		-	-	-	-	-	-	-	-
2002	6	18	24	-	-	-	-	-	-		-	-	-	-	-	-	-	-
2003	6	18	24	-	-	-	-	-	-		-	-	-	-	-	-	-	-
2006	6	18	24	20.1	21.5	19	1022.7	88	12.95	1	12.7	3.1	9.4	-	o
2007	6	18	24	23.4	27	10.6	1021.2	69	0	0	17.5	7	13	-
2008	6	18	24	22.1	25.3	17.4	1024.5	79	2.03	1	13.8	14.8	22.2	-	o
2009	6	18	24	23.2	26	19.2	-	67	0	0	20.6	11.7	31.3	-
2010	6	18	24	19.5	22.4	12.3	1026.1	76	6.1	1	19.3	11.9	22.2	-	o
2001	6	19	25	24.3	26.2	13.5	-	60	0	0	18.5	9.3	14.8	28.7
2002	6	19	25	-	-	-	-	-	-		-	-	-	-	-	-	-	-
2003	6	19	25	-	-	-	-	-	-		-	-	-	-	-	-	-	-
2006	6	19	25	20.1	22.2	16.5	1021.7	82	6.1	1	17.5	7.8	13	-	o
2007	6	19	25	21.3	25.5	17.7	1024.5	81	5.08	1	17.5	5.4	18.3	-	o
2008	6	19	25	21.7	24.3	17.2	1021.9	79	20.07	1	16.6	14.3	22.2	-	o
2009	6	19	25	24.3	26.2	17.9	-	62	2.03	1	18.2	20.7	27.8	-
2010	6	19	25	22.1	24.6	19	1024.9	58	0	0	20.6	12	27.8	-
2001	6	20	25	-	-	-	-	-	-		-	-	-	-	-	-	-	-
2002	6	20	25	-	-	-	-	-	-		-	-	-	-	-	-	-	-
2003	6	20	25	-	-	-	-	-	-		-	-	-	-	-	-	-	-
2006	6	20	25	22.3	24.5	17.5	1021	82	5.08	1	20.3	7.8	13	-	o
2007	6	20	25	21.5	24.7	17.5	1024.3	70	0	0	16.9	6.7	18.3	-
2008	6	20	25	21.4	26	16.3	1020	74	0.51	1	17.5	3.9	9.4	-
2009	6	20	25	-	-	-	-	-	-		-	-	-	-	-	-	-	-
2010	6	20	25	21.5	25	13.9	1023.6	74	0.51	1	21.4	6.7	18.3	-
2001	6	21	25	-	-	-	-	-	-		-	-	-	-	-	-	-	-
2002	6	21	25	-	-	-	-	-	-		-	-	-	-	-	-	-	-
2003	6	21	25	-	-	-	-	-	-		-	-	-	-	-	-	-	-
2006	6	21	25	23.2	26.5	20.6	1017.3	80	0	0	21.6	10.4	14.8	-
2007	6	21	25	21.6	24.8	15.4	1023.1	66	0	0	18.8	12.8	20.6	28.7
2008	6	21	25	21.7	25	16	-	79	0	0	19.3	2.6	9.4	32.4
2009	6	21	25	23.6	26.3	16.5	1017.7	75	0	0	29.9	9.3	11.1	-
2010	6	21	25	22	25.7	14.5	1022.8	64	0	0	21.4	7.8	22.2	-
2001	6	22	25	22	25	14.4	-	61	0	0	20	-	-	-
2002	6	22	25	20.4	22.5	16.6	1026.3	78	2.03	1	23.8	5.2	9.4	32.4
2003	6	22	25	-	-	-	-	-	-		-	-	-	-	-	-	-	-
2006	6	22	25	23	29	17.5	1014.9	75	0	0	19.6	5	16.5	32.4
2007	6	22	25	20.9	24.1	16.1	1022.6	75	3.05	1	15.1	7	14.8	-	o
2008	6	22	25	23.4	27	15.9	1018.8	83	0	0	19.5	5.9	9.4	18
2009	6	22	25	23.2	26	16.2	1016	78	0	0	22	6.7	18.3	-				o
2010	6	22	25	20.1	22.6	13.2	1021.7	75	0.25	1	16.3	7	18.3	-	o
2001	6	23	25	-	-	-	-	-	-		-	-	-	-	-	-	-	-
2002	6	23	25	22.6	25	15.4	1022.1	65	0.25	1	23.8	1.9	11.1	25.2
2003	6	23	25	-	-	-	-	-	-		-	-	-	-	-	-	-	-
2006	6	23	25	21.9	23.7	19.1	1019.8	78	0.25	1	19.2	18.3	27.8	35.9	o
2007	6	23	25	21.2	25	15.4	1024.4	69	2.03	1	22	6.1	13	-
2008	6	23	25	21	24	18.2	1022.7	80	0	0	17.5	5	29.4	32.4
2009	6	23	25	-	-	-	-	-	-		-	-	-	-	-	-	-	-
2010	6	23	25	24.4	26	21	-	64	0.51	1	16.9	4.4	13	-
2001	6	24	25	24.6	25.2	23	-	63	0	0	15.3	13.9	20.6	-
2002	6	24	25	-	-	-	-	-	-		-	-	-	-	-	-	-	-
2003	6	24	25	-	-	-	-	-	-		-	-	-	-	-	-	-	-
2006	6	24	25	21.9	25	19	1020.5	64	0	0	17.2	8	13	-
2007	6	24	25	23.3	27	14.1	1025.7	69	0	0	18.8	8.5	14.8	-
2008	6	24	25	21.8	26	16.3	1022.6	80	0	0	16.9	6.3	9.4	14.4
2009	6	24	25	26.1	30	19	1012.3	52	0	0	24	20.4	25.9	-
2010	6	24	25	23.7	26	14.3	-	64	0	0	15.4	11.3	22.2	-
2001	6	25	25	-	-	-	-	-	-		-	-	-	-	-	-	-	-
2002	6	25	25	22.1	23.8	16.9	1024.9	75	1.02	1	20.3	8.5	18.3	35.9	o
2003	6	25	25	-	-	-	-	-	-		-	-	-	-	-	-	-	-
2006	6	25	25	21.1	25.8	14.1	1021.6	69	0	0	19.2	3	9.4	35.9
2007	6	25	25	-	-	-	-	-	-		-	-	-	-	-	-	-	-
2008	6	25	25	22.1	25	18.7	1023.1	77	0	0	16.6	3.9	9.4	-
2009	6	25	25	24.3	29.6	13.6	1011.8	43	0	0	19.2	8.1	20.6	-
2010	6	25	25	22.6	26	14.4	1023	76	0.25	1	18.5	10.6	22.2	-	o
2001	6	26	26	-	-	-	-	-	-		-	-	-	-	-	-	-	-
2002	6	26	26	21.7	24	18.5	-	78	4.06	1	17.1	1.9	5.4	25.2	o
2003	6	26	26	-	-	-	-	-	-		-	-	-	-	-	-	-	-
2006	6	26	26	19.2	21.9	17.5	1029.6	71	0.51	1	15.9	18.5	29.4	-	o
2007	6	26	26	23.6	26.3	15.1	-	70	0	0	20.6	8	11.1	18
2008	6	26	26	21.8	26	16.2	1022	73	0	0	17.2	6.5	9.4	14.4
2009	6	26	26	-	-	-	-	-	-		-	-	-	-	-	-	-	-
2010	6	26	26	23.5	26.4	14.1	1020.2	69	0.76	1	19.5	6.5	18.3	-
2001	6	27	26	-	-	-	-	-	-		-	-	-	-	-	-	-	-
2002	6	27	26	23.6	25.7	18.3	1018.3	72	4.06	1	23	9.6	11.1	14.4
2003	6	27	26	-	-	-	-	-	-		-	-	-	-	-	-	-	-
2006	6	27	26	17.8	21.2	14.4	1029	79	3.05	1	17.1	4.8	16.5	-	o
2007	6	27	26	25.6	27.1	18.3	-	74	0	0	22.5	26.1	29.4	-
2008	6	27	26	22.1	26	14.5	1021.6	68	0	0	16.1	1.3	5.4	28.7
2009	6	27	26	-	-	-	-	-	-		-	-	-	-	-	-	-	-
2010	6	27	26	22.7	26	13.5	1023.1	75	0	0	18.8	11.1	27.8	-
2001	6	28	26	21.5	24	18	-	74	0	0	23	2.8	5.4	-
2002	6	28	26	23.4	25	20.3	1019	78	0	0	20.6	10.7	20.6	25.2
2003	6	28	26	-	-	-	-	-	-		-	-	-	-	-	-	-	-
2006	6	28	26	18.6	21	14.5	1026.9	86	2.03	1	15.3	3.3	9.4	-	o
2007	6	28	26	20.2	24	18.8	-	68	0	0	22.5	21.1	24.1	-
2008	6	28	26	21.3	26.5	16	1020.3	76	0	0	17.4	7.2	11.1	-
2009	6	28	26	-	-	-	-	-	-		-	-	-	-	-	-	-	-
2010	6	28	26	22.8	25	16.5	1025.7	73	0.25	1	18.5	20.4	33.5	-	o
2001	6	29	26	23.2	25.4	15.4	-	70	0	0	17.4	8.3	16.5	32.4
2002	6	29	26	23.9	26	21.2	-	81	0	0	20.6	6.1	9.4	-
2003	6	29	26	-	-	-	-	-	-		-	-	-	-	-	-	-	-
2006	6	29	26	18.7	22.3	15.4	1025.5	85	21.08	1	18	7.6	14.8	-	o
2007	6	29	26	23.2	26.2	14.2	1020.5	68	0	0	20.6	7.4	25.9	32.4
2008	6	29	26	21.6	26	15.6	1021.5	76	0	0	19	3.3	9.4	32.4
2009	6	29	26	-	-	-	-	-	-		-	-	-	-	-	-	-	-
2010	6	29	26	22.3	24.6	15.6	1024.6	72	2.03	1	19.8	15.2	29.4	-
2001	6	30	26	-	-	-	-	-	-		-	-	-	-	-	-	-	-
2002	6	30	26	25.1	27.8	18.7	1023	68	0	0	20.4	5.4	14.8	-
2003	6	30	26	-	-	-	-	-	-		-	-	-	-	-	-	-	-	-
2006	6	30	26	19.5	23.1	12.3	1027	84	0	0	13.8	3.7	16.5	-	o
2007	6	30	26	22.6	26	15.4	1020.1	71	0	0	21.7	2.6	7.6	32.4
2008	6	30	26	22.3	25.2	17.2	1022.4	70	0	0	18.3	12.8	22.2
2009	6	30	26	-	-	-	-	-
2010	6	30	26	23.2	26.3	14.4	-	70	0	0	18.3	2	5.4
2001	7	1	26	-	-	-	-	-	-		-	-	-	-	-	-	-	-
2002	7	1	26	21.6	23	19.2	1028.2	68	1.02	1	20.6	17.8	22.2	28.7
2003	7	1	26	-	-	-	-	-	-		-	-	-	-	-	-	-	-	-
2006	7	1	26	20.7	24.3	16.7	1026.4	77	7.11	1	17.7	5	13	18	o
2007	7	1	26	-	-	-	-	-	-		-	-	-	-	-	-	-	-
2008	7	1	26	21.9	25.8	16.5	1021	75	0	0	18	10	22.2	-
2009	7	1	26	-	-	-	-	-	-		-	-	-	-	-	-	-	-
2010	7	1	26	21.6	24	14.2	-	78	0	0	16.7	7.6	18.3	-	o
2001	7	2	26	23.8	25	19.4	-	71	0	0	24.9	15.6	20.6	-
2002	7	2	26	20	21.6	18	-	83	2.03	1	14.5	5.2	18.3	-	o
2003	7	2	26	-	-	-	-	-	-		-	-	-	-	-	-	-	-	-
2006	7	2	26	20.5	25	15.6	1022.2	82	0	0	16.9	0.9	5.4	28.7
2007	7	2	26	20.1	22.2	15.8	1028.8	63	8.89	1	15.9	34.3	37	-	o
2008	7	2	26	22.1	25.6	16.4	1016.7	75	0	0	18	12	18.3	32.4
2009	7	2	26	20.3	24.2	14.2	1029.3	76	6.1	1	16.1	10.7	33.5	-	o
2010	7	2	26	22.6	25	15.6	-	67	8.89	1	16.1	21.7	31.3	-	o
2001	7	3	27	23.8	26	20	-	74	0	0	19.2	10.2	14.8	-
2002	7	3	27	21.4	23.2	16.2	1026.4	66	0	0	19.6	8.9	14.8	-
2003	7	3	27	-	-	-	-	-	-		-	-	-	-	-	-	-	-	-
2006	7	3	27	21.2	26.6	15.1	1019.2	76	0	0	19	6.1	35.2	-
2007	7	3	27	19.3	22	14.4	-	78	7.11	1	13	7.4	24.1	-	o
2008	7	3	27	23.5	27	16.3	1014.1	72	0	0	18.7	12.2	20.6	35.9
2009	7	3	27	21.7	24.9	14	1026.5	75	0	0	19.3	6.9	18.3	-
2010	7	3	27	22.6	25.7	15	1023.4	77	5.08	1	20.4	9.8	18.3	-
2001	7	4	27	-	-	-	-	-	-		-	-	-	-	-	-	-	-
2002	7	4	27	20.1	22	15.8	1024.2	82	5.08	1	22	7.2	9.4	21.7
2003	7	4	27	-	-	-	-	-	-		-	-	-	-	-	-	-	-	-
2006	7	4	27	21.9	26.8	16.1	1020.7	72	0	0	17.5	4.3	11.1	35.9
2007	7	4	27	20.2	23.7	14.6	1028.1	77	3.05	1	24	5.9	18.3	21.7	o
2008	7	4	27	22.4	27	17.4	1013.6	85	0	0	22.7	8.9	13	32.4
2009	7	4	27	-	-	-	-	-	-		-	-	-	-	-	-	-	-
2010	7	4	27	23.1	25.6	19.1	1025	70	0	0	19.5	14.3	22.2	-
2001	7	5	27	24.4	27.3	19.1	-	73	0	0	21.9	14.4	22.2	32.4
2002	7	5	27	22.3	25	16.4	1021.6	69	0	0	22	2.2	5.4	14.4
2003	7	5	27	-	-	-	-	-	-		-	-	-	-	-	-	-	-	-
2006	7	5	27	21.8	25	15.4	1023	72	0	0	19.5	6.9	13	35.9
2007	7	5	27	20.3	22.1	15.5	1025.7	80	3.05	1	20.4	5.4	18.3	21.7
2008	7	5	27	24.1	26	19.7	1010.9	79	0	0	15	24.1	25.9	32.4
2009	7	5	27	-	-	-	-	-	-		-	-	-	-	-	-	-	-
2010	7	5	27	22.2	25.2	15.4	1025.3	73	0	0	17.1	6.1	20.6	-	o
2001	7	6	27	-	-	-	-	-	-		-	-	-	-	-	-	-	-
2002	7	6	27	23.8	25.1	22.4	-	60	0	0	25.3	7	9.4	-
2003	7	6	27	-	-	-	-	-	-		-	-	-	-	-	-	-	-	-
2006	7	6	27	22.6	26	20	1019.1	68	0	0	18.3	9.4	16.5	-
2007	7	6	27	20.8	24.2	15.2	1022	77	0.51	1	21.2	4.3	11.1	14.4	o
2008	7	6	27	23.9	28	20	1015.4	63	0	0	15.1	5	13	28.7
2009	7	6	27	20.9	23.8	15	1022.3	76	7.87	1	17.9	11.9	27.8	-	o
2010	7	6	27	23.3	25.5	14.8	1023.6	58	0.51	1	20.6	6.7	11.1	-
2001	7	7	27	23.1	23.9	15	-	63	9.91	1	-	32	35.2	-
2002	7	7	27	-	-	-	-	-	-		-	-	-	-	-	-	-	-
2003	7	7	27	-	-	-	-	-	-		-	-	-	-	-	-	-	-	-
2006	7	7	27	22.6	27.6	16.6	1019.2	70	0	0	18	14.1	25.9	28.7	o
2007	7	7	27	-	-	-	-	-	-		-	-	-	-	-	-	-	-
2008	7	7	27	22.2	26	14.2	1019.5	71	0	0	16.1	5.6	11.1	28.7
2009	7	7	27	21.2	24.3	15.3	1024.6	69	0	0	17.2	18.5	46.5	-
2010	7	7	27	21.8	25	17.8	1024.3	67	0	0	24.3	8.1	18.3	-	o
2001	7	8	27	-	-	-	-	-	-		-	-	-	-	-	-	-	-
2002	7	8	27	22.6	26	16	-	71	0	0	18	3.9	9.4	25.2
2003	7	8	27	-	-	-	-	-	-		-	-	-	-	-	-	-	-	-
2006	7	8	27	21.1	25	17.8	1026.6	73	0	0	15.1	11.3	20.6	28.7	o
2007	7	8	27	23.6	27.6	19.7	1019.2	64	0	0	29.9	10.7	18.3	-
2008	7	8	27	22.2	26.1	17	1016.7	84	0	0	23.5	8.1	24.1	32.4
2009	7	8	27	21.5	24.6	15	1026.8	66	0	0	16.6	17	37	-	o
2010	7	8	27	23.6	25	13.9	1026.6	69	0	0	26.2	14.4	22.2	-
2001	7	9	27	-	-	-	-	-	-		-	-	-	-	-	-	-	-
2002	7	9	27	25.8	27	24.3	-	69	0	0	15	15.2	16.5	-
2003	7	9	27	-	-	-	-	-	-		-	-	-	-	-	-	-	-	-
2006	7	9	27	20.9	25.6	16.6	1026.7	74	2.03	1	15.9	3.1	9.4	32.4	o
2007	7	9	27	21.8	24	17.4	1025.2	62	0	0	20.6	21.1	29.4	32.4
2008	7	9	27	24.3	28.4	17	1012.9	80	0	0	18.2	15.9	20.6	28.7
2009	7	9	27	21.4	25.7	14.7	1023.3	72	0	0	18.8	7	18.3	-
2010	7	9	27	-	-	-	-	-	-		-	-	-	-	-	-	-	-
2001	7	10	28	22.9	26.5	15.7	-	73	0	0	24.9	-	-	-
2002	7	10	28	23.5	25.1	22	-	66	0	0	19.3	20.6	24.1	-
2003	7	10	28	-	-	-	-	-	-		-	-	-	-	-	-	-	-	-
2006	7	10	28	20.6	24	17	1027.1	70	0	0	20.1	3.7	11.1	-
2007	7	10	28	21.1	23.7	15	1024.8	64	0	0	24.1	8.3	16.5	28.7
2008	7	10	28	23.8	27.5	19.2	1018.4	73	0	0	19.2	10.4	20.6	28.7
2009	7	10	28	21.4	26	14.6	1021.9	66	0	0	17.4	8	20.6	-
2010	7	10	28	-	-	-	-	-	-		-	-	-	-	-	-	-	-
2001	7	11	28	22.5	24	16.5	-	69	0	0	24.9	15.6	25.9	33.5
2002	7	11	28	20.9	22.7	17.1	1020.5	67	0.25	1	22	11.9	18.3	28.7
2003	7	11	28	-	-	-	-	-	-		-	-	-	-	-	-	-	-	-
2006	7	11	28	22.3	25.3	16.5	1026.3	61	0	0	20.6	5.2	14.8	-
2007	7	11	28	22.6	26	14.1	1022.2	63	0	0	23.8	2.2	7.6	-
2008	7	11	28	21.3	24.5	17.7	1025.5	58	0	0	18.7	18.3	24.1	25.2
2009	7	11	28	22	25	14	-	69	0	0	18.5	11.7	35.2	-
2010	7	11	28	-	-	-	-	-	-		-	-	-	-	-	-	-	-
2001	7	12	28	22.7	24.2	16.5	-	67	0	0	19.2	13.1	18.3	21.7
2002	7	12	28	20.9	24.5	14.8	-	66	0.51	1	23.8	7.2	9.4	21.7
2003	7	12	28	-	-	-	-	-	-		-	-	-	-	-	-	-	-	-
2006	7	12	28	22.2	25.6	18.4	1023.7	70	0	0	19.2	7.6	14.8	18
2007	7	12	28	24.1	27	15.9	1019.6	58	0	0	19.6	10.2	16.5	32.4
2008	7	12	28	20.3	24.4	15	1023.5	71	0	0	17.1	6.9	13	28.7	o
2009	7	12	28	23.6	26.7	21	1017.2	77	0	0	19.8	10.4	22.2	-
2010	7	12	28	-	-	-	-	-	-		-	-	-	-	-	-	-	-
2001	7	13	28	-	-	-	-	-	-		-	-	-	-	-	-	-	-
2002	7	13	28	21.2	24	15	-	69	0	0	20.6	5.9	7.6	32.4
2003	7	13	28	-	-	-	-	-	-		-	-	-	-	-	-	-	-	-
2006	7	13	28	21.6	26	15.8	1023.7	76	0	0	16.1	3.9	13	32.4
2007	7	13	28	21.2	24.5	15	1025.9	76	0	0	17.4	19.8	33.5	-	o
2008	7	13	28	19.6	31	15.4	1024.2	79	0	0	20.4	6.3	13	21.7
2009	7	13	28	23.9	26.8	16.9	1016.6	81	0	0	18	17.8	27.8	-
2010	7	13	28	-	-	-	-	-	-		-	-	-	-	-	-	-	-
2001	7	14	28	21.6	24.1	15.5	-	67	0	0	23.3	14.4	16.5	18
2002	7	14	28	20.8	25.1	14.8	1022.5	71	0	0	23	3	9.4	32.4
2003	7	14	28	-	-	-	-	-	-		-	-	-	-	-	-	-	-	-
2006	7	14	28	21.2	26	16.4	1023.5	76	0	0	18.3	5	14.8	35.9
2007	7	14	28	21	22.8	13.8	1026.6	65	0	0	29.9	10.4	18.3	-
2008	7	14	28	20	24	14.4	1026.2	73	0	0	17.4	7.6	18.3	-
2009	7	14	28	24.6	27.8	17	1015	80	0	0	17.4	20.6	27.8	-
2010	7	14	28	20.9	23.1	14.5	1021.1	69	0.25	1	28	9.3	16.5	-
2001	7	15	28	-	-	-	-	-	-		-	-	-	-	-	-	-	-
2002	7	15	28	23	25.1	14	1018.2	62	0	0	25.9	10.7	20.6	32.4
2003	7	15	28	-	-	-	-	-	-		-	-	-	-	-	-	-	-	-
2006	7	15	28	21.5	26.3	17	1022.7	74	0	0	17.9	5.2	11.1	-
2007	7	15	28	-	-	-	-	-	-		-	-	-	-	-	-	-	-
2008	7	15	28	19.7	23.5	14.5	1024	66	0	0	16.3	4.1	7.6	21.7
2009	7	15	28	23.8	27.2	17.8	1019.5	81	0	0	18.2	16.7	27.8	-
2010	7	15	28	-	-	-	-	-	-		-	-	-	-	-	-	-	-
2001	7	16	28	23.3	25	16.6	-	66	2.03	1	20.4	8	14.8	18
2002	7	16	28	23.9	26.2	17	1014.8	72	0	0	21.4	14.8	18.3	35.9
2003	7	16	28	-	-	-	-	-	-		-	-	-	-	-	-	-	-	-
2006	7	16	28	21.2	26	17	1023	71	0	0	18.5	3.5	13	35.9
2007	7	16	28	20.5	23	15.9	-	75	1.02	1	14.3	6.1	11.1	14.4	o
2008	7	16	28	20.9	25.3	13	1022.4	67	0	0	18	4.1	14.8	-
2009	7	16	28	21.2	23	19	1026.8	79	9.91	1	15.9	20.6	33.5	-	o
2010	7	16	28	-	-	-	-	-	-		-	-	-	-	-	-	-	-
2001	7	17	29	23.5	26	14.1	-	62	0	0	24.8	7.8	18.3	35.9
2002	7	17	29	23.8	26.3	18	1017.7	75	0	0	23.8	7	16.5	32.4
2003	7	17	29	-	-	-	-	-	-		-	-	-	-	-	-	-	-	-
2006	7	17	29	17.5	21	13.7	-	85	0	0	13.7	0.9	7.6	35.9
2007	7	17	29	-	-	-	-	-	-		-	-	-	-	-	-	-	-
2008	7	17	29	20.4	25	13.9	1025.6	70	0	0	15.1	9.8	14.8	35.9
2009	7	17	29	20.8	23.7	15.5	1028.1	66	0	0	19	17.2	37	-	o
2010	7	17	29	-	-	-	-	-	-		-	-	-	-	-	-	-	-
2001	7	18	29	23.6	26.2	17.5	-	74	0	0	20	15.6	25.9	35.9
2002	7	18	29	21.4	23	15	1017.8	81	28.96	1	18.3	11.9	20.6	25.2	o		o
2003	7	18	29	-	-	-	-	-	-		-	-	-	-	-	-	-	-	-
2006	7	18	29	23.4	27	18	1018.6	70	0	0	21.1	9.1	18.3	35.9
2007	7	18	29	-	-	-	-	-	-		-	-	-	-	-	-	-	-
2008	7	18	29	21.3	25.5	18	1025.5	77	0.51	1	16.4	7.6	18.3	-	o
2009	7	18	29	21.2	24	14.6	1028.8	59	0.51	1	20.6	17.6	35.2	-
2010	7	18	29	-	-	-	-	-	-		-	-	-	-	-	-	-	-
2001	7	19	29	25.7	29.8	20	-	70	0	0	17.9	16.9	18.3	-
2002	7	19	29	19.2	20	15	-	88	11.94	1	16.9	1.3	7.6	10.7
2003	7	19	29	-	-	-	-	-	-		-	-	-	-	-	-	-	-	-
2006	7	19	29	-	-	-	-	-	-		-	-	-	-	-	-	-	-
2007	7	19	29	21.9	25	16.9	-	76	1.02	1	16.4	4.8	11.1	-
2008	7	19	29	22	25	16.3	1024.5	71	0	0	18.5	11.5	20.6	25.2
2009	7	19	29	20.9	22.6	16.5	1029	59	0	0	21.7	15.6	27.8	-
2010	7	19	29	-	-	-	-	-	-		-	-	-	-	-	-	-	-
2001	7	20	29	22.4	25.8	15.3	-	76	0	0	17.5	-	-	-
2002	7	20	29	20.4	22	14.8	1020.6	83	2.03	1	16.7	6.3	9.4	-
2003	7	20	29	-	-	-	-	-	-		-	-	-	-	-	-	-	-	-
2006	7	20	29	20.5	22	16.6	-	86	0	0	14.5	0	-	21.7
2007	7	20	29	22.8	25.7	15.6	1020.9	71	0	0	19.2	8.1	13	35.9
2008	7	20	29	21.7	25	16.1	1023.5	76	0	0	18	8.9	20.6	32.4
2009	7	20	29	22.3	24	15.2	1028.2	55	0	0	18	18.9	27.8	-
2010	7	20	29	-	-	-	-	-	-		-	-	-	-	-	-	-	-
2001	7	21	29	-	-	-	-	-	-		-	-	-	-	-	-	-	-
2002	7	21	29	19.7	20.1	15.2	-	92	1.02	1	12.9	2.6	7.6	-	o		o
2003	7	21	29	-	-	-	-	-	-		-	-	-	-	-	-	-	-	-
2006	7	21	29	-	-	-	-	-	-		-	-	-	-	-	-	-	-
2007	7	21	29	22.6	26.6	16.3	1020.8	73	0	0	27.4	5.6	11.1	32.4
2008	7	21	29	22.4	26.2	16.6	1023.7	73	0	0	21.1	6.5	18.3	28.7
2009	7	21	29	20.9	24.4	15	1024.9	59	0	0	17.2	9.3	20.6	-
2010	7	21	29	22.5	23.9	14.2	1023	84	0.76	1	29.9	6.9	14.8	-
2001	7	22	29	19.8	23.4	14.9	1018.5	71	0	0	24	28.9	72	-
2002	7	22	29	22.9	25.6	21	-	75	0	0	19.3	9.8	14.8	-
2003	7	22	29	-	-	-	-	-	-		-	-	-	-	-	-	-	-	-
2006	7	22	29	-	-	-	-	-	-		-	-	-	-	-	-	-	-
2007	7	22	29	22.3	25.6	16	1022.2	72	0	0	21.2	4.4	13	32.4
2008	7	22	29	22.7	26	19.4	1023.5	71	0	0	17.4	10.4	20.6	-
2009	7	22	29	20.7	24.5	12.5	1018	68	0	0	17.7	8.5	22.2	-
2010	7	22	29	-	-	-	-	-	-		-	-	-	-	-	-	-	-
2001	7	23	29	23.4	27	15.5	-	62	0	0	18.3	6.9	11.1	32.4
2002	7	23	29	24.1	27	20	-	58	0	0	18.5	8.1	13	-
2003	7	23	29	-	-	-	-	-	-		-	-	-	-	-	-	-	-	-
2006	7	23	29	-	-	-	-	-	-		-	-	-	-	-	-	-	-
2007	7	23	29	21.9	26.2	15.4	1020.7	77	0	0	18.7	4.1	13	32.4
2008	7	23	29	22.1	24	17	-	74	0	0	15.9	13	22.2	32.4	o
2009	7	23	29	22.5	27.7	12.5	1013.8	67	0	0	20.6	16.3	31.3	-
2010	7	23	29	-	-	-	-	-	-		-	-	-	-	-	-	-	-
2001	7	24	30	17.5	19	15.2	-	72	0	0	20	29.1	37	-	o
2002	7	24	30	23.8	26.5	14.8	1017.2	75	0	0	23.3	14.3	22.2	35.9
2003	7	24	30	-	-	-	-	-	-		-	-	-	-	-	-	-	-	-
2006	7	24	30	22.8	26.4	16.5	1020.1	75	0	0	17.7	7.4	14.8	32.4
2007	7	24	30	22.6	26.4	15.6	1018.4	72	0	0	17.5	8.7	16.5	35.9
2008	7	24	30	21.1	26.1	19	1025.5	77	0	0	16.1	2.4	14.8	-
2009	7	24	30	20.6	24	15.9	1022.6	65	0	0	19.8	25.9	40.7	-
2010	7	24	30	-	-	-	-	-	-		-	-	-	-	-	-	-	-
2001	7	25	30	18.8	19.2	14.7	-	83	5.08	1	12.7	23.7	25.9	-	o
2002	7	25	30	25.4	27.8	23	-	75	0	0	20.3	9.4	11.1	-
2003	7	25	30	-	-	-	-	-	-		-	-	-	-	-	-	-	-	-
2006	7	25	30	21.6	26.5	14.3	1022.1	74	0	0	17.9	-	-	-				o
2007	7	25	30	20.3	23	15.1	-	81	0	0	-	2.4	9.4	32.4
2008	7	25	30	20.7	25.2	17.3	1024	82	0.51	1	16.3	4.4	16.5	-	o
2009	7	25	30	19.6	22	14.2	1027.6	64	0.51	1	28	14.4	22.2	-
2010	7	25	30	-	-	-	-	-	-		-	-	-	-	-	-	-	-
2001	7	26	30	22.1	23	15.2	-	66	9.91	1	-	21.9	25.9	-
2002	7	26	30	-	-	-	-	-	-		-	-	-	-	-	-	-	-
2003	7	26	30	-	-	-	-	-	-		-	-	-	-	-	-	-	-	-
2006	7	26	30	21.2	26.4	16	1025.7	78	0	0	18.3	-	-	-
2007	7	26	30	-	-	-	-	-	-		-	-	-	-	-	-	-	-
2008	7	26	30	21.1	26.2	16.6	1022.6	79	18.03	1	21.7	3.7	11.1	14.4
2009	7	26	30	20.7	23.7	17.5	1028.1	62	0	0	23.8	14.3	22.2	-
2010	7	26	30	22.2	25	15	1023.2	73	0	0	28	6.7	14.8	-
2001	7	27	30	21	24.1	13.6	-	76	2.03	1	24.9	8.3	18.3	-
2002	7	27	30	22.1	26	13.5	-	84	0	0	21.9	8.5	24.1	32.4
2003	7	27	30	-	-	-	-	-	-		-	-	-	-	-	-	-	-	-
2006	7	27	30	21.6	25.8	18.5	1027.3	73	0	0	18.7	-	-	-
2007	7	27	30	-	-	-	-	-	-		-	-	-	-	-	-	-	-
2008	7	27	30	22.9	27.4	16.8	1020	77	0	0	17.5	4.3	9.4	14.4
2009	7	27	30	21.2	24	10.2	1027.2	69	2.03	1	19.6	20	37	-	o
2010	7	27	30	-	-	-	-	-	-		-	-	-	-	-	-	-	-
2001	7	28	30	-	-	-	-	-	-		-	-	-	-	-	-	-	-
2002	7	28	30	-	-	-	-	-	-		-	-	-	-	-	-	-	-
2003	7	28	30	-	-	-	-	-	-		-	-	-	-	-	-	-	-	-
2006	7	28	30	21	25	16.1	1025.6	73	0	0	18	-	-	-
2007	7	28	30	-	-	-	-	-	-		-	-	-	-	-	-	-	-
2008	7	28	30	22.9	27.2	17.6	1019.9	77	0	0	20.8	5.9	14.8	35.9
2009	7	28	30	21.6	24.2	11.4	1024.3	66	0	0	20.6	17.8	27.8	-
2010	7	28	30	21.4	24.2	13.4	1021.5	77	0	0	20.3	9.1	16.5	-	o
2001	7	29	30	23.2	25	17	-	74	1.02	1	26.1	16.7	22.2	32.4
2002	7	29	30	25.4	27.2	17.2	-	78	3.56	1	22.2	14.1	22.2	32.4
2003	7	29	30	-	-	-	-	-	-		-	-	-	-	-	-	-	-	-
2006	7	29	30	-	-	-	-	-	-		-	-	-	-	-	-	-	-
2007	7	29	30	-	-	-	-	-	-		-	-	-	-	-	-	-	-
2008	7	29	30	21.3	23.3	17.2	1023.7	83	5.08	1	15.8	5	14.8	32.4	o
2009	7	29	30	21.2	24	14.5	1021.5	76	0.25	1	19.8	13.5	27.8	-	o
2010	7	29	30	23.2	25	13.6	-	77	5.08	1	16.4	16.9	29.4	-
2001	7	30	30	22.6	23.1	16.3	-	75	13.97	1	14.2	21.7	40.7	-
2002	7	30	30	24.6	27	17.5	-	79	0	0	22.2	14.3	24.1	32.4
2003	7	30	30	-	-	-	-	-	-		-	-	-	-	-	-	-	-	-
2006	7	30	30	-	-	-	-	-	-		-	-	-	-	-	-	-	-
2007	7	30	30	21.7	26	14.6	1020	66	0	0	17.1	8.1	18.3	25.2
2008	7	30	30	22.1	26	16.6	1021.9	77	0	0	22.4	8.7	14.8	-
2009	7	30	30	21.8	25.3	14.4	1020.2	70	0	0	20.6	8.7	18.3	-
2010	7	30	30	22	23	13.6	-	56	0.76	1	12.2	30.2	33.5	-
2001	7	31	31	21.8	23.4	17.4	1032.2	65	2.03	1	23.8	20.2	25.9	-
2002	7	31	31	20.3	21	16.8	1027.5	76	0.76	1	14.6	23.5	27.8	32.4	o
2003	7	31	31	-	-	-	-	-	-		-	-	-	-	-	-	-	-	-
2006	7	31	31	22.9	26.5	16.9	1018.3	82	0	0	19.8
2007	7	31	31	21.2	26.1	13.9	1023.7	69	0	0	16.6	4.8	13	32.4
2008	7	31	31	22.5	26	16.7	1018.4	74	0	0	19.6	11.5	20.6
2009	7	31	31	22.4	26.1	14.4	1019.4	74	1.02	1	21.4	10.6	27.8	-
2010	7	31	31	21.5	23	14	-	62	3.05	1	25.3	12	22.2
2001	8	1	31	22.6	23.2	17.5	-	61	0	0	22.9	13.3	18.3	-
2002	8	1	31	22.4	24	14.5	1027.6	62	4.06	1	20.6	11.1	18.3	-
2003	8	1	31	-	-	-	-	-	-		-	-	-	-	-	-	-	-	-
2006	8	1	31	24.3	27	18.5	1014.6	81	0	0	17.2	-	-	-
2007	8	1	31	22.1	25.6	14	1022	67	0	0	17.5	11.7	22.2	32.4
2008	8	1	31	22.4	26.5	16.8	1017.3	77	0	0	17.7	10.2	18.3	-
2009	8	1	31	22.9	25	14.7	1017.9	68	0	0	22	36.1	-	-
2010	8	1	31	22.3	25	13.2	-	68	0	0	15.9	7.4	11.1	-
2001	8	2	31	22.3	23.8	10.8	-	63	0	0	22.9	7.4	9.4	-
2002	8	2	31	22.2	25	13	1022.3	72	0	0	22	4.3	9.4	18
2003	8	2	31	-	-	-	-	-	-		-	-	-	-	-	-	-	-	-
2006	8	2	31	23.9	27.5	19	1008.5	76	1.02	1	16.3	-	-	-	o		o
2007	8	2	31	22.1	25.7	15.1	1018.7	74	0	0	18.2	15.4	22.2	35.9
2008	8	2	31	21.8	26.6	16.1	1020.5	77	0	0	18.3	4.3	11.1	-
2009	8	2	31	23.8	26.2	15.6	1016.4	80	0	0	19.6	24.1	37	-				o
2010	8	2	31	22.4	24.1	14.4	1025.4	70	0	0	21.1	11.1	22.2	-
2001	8	3	31	-	-	-	-	-	-		-	-	-	-	-	-	-	-
2002	8	3	31	24.9	26	23.4	-	59	0	0	20.6	14.8	16.5	-
2003	8	3	31	-	-	-	-	-	-		-	-	-	-	-	-	-	-	-
2006	8	3	31	22.3	27.4	15	1006.6	48	0	0	18.8	-	-	-
2007	8	3	31	23.3	28.6	15.8	1016.3	73	0	0	18	18.1	22.2	35.9
2008	8	3	31	21.7	25.6	16.5	1023	78	0	0	19.8	9.4	20.6	-
2009	8	3	31	22.1	26.1	16.1	1018.9	72	0	0	20.6	9.6	18.3	-
2010	8	3	31	23.1	25	19.3	-	79	0	0	15.6	12.2	18.3	-	o
2001	8	4	31	-	-	-	-	-	-		-	-	-	-	-	-	-	-
2002	8	4	31	23.1	25	15.2	-	70	0	0	20.1	9.6	18.3	32.4	o
2003	8	4	31	-	-	-	-	-	-		-	-	-	-	-	-	-	-	-
2006	8	4	31	20.8	27.2	16	1009.7	60	0.25	1	16.9	-	-	-	o		o
2007	8	4	31	23.2	28.7	16.9	1018.3	76	0	0	17.7	12.4	32.4	-
2008	8	4	31	22.4	25.1	17.6	1024.6	67	0	0	17.4	15	24.1	-
2009	8	4	31	22.2	26.2	15.2	1020.2	70	0	0	20.6	6.3	18.3	-
2010	8	4	31	22.4	25.2	15.1	1022.2	70	0.51	1	26.6	8.5	20.6	-
2001	8	5	31	22.3	23.8	20	-	69	0	0	20.6	-	-	-
2002	8	5	31	23.4	25.9	15.2	-	71	0.51	1	19	4.3	9.4	28.7
2003	8	5	31	-	-	-	-	-	-		-	-	-	-	-	-	-	-	-
2006	8	5	31	19.6	24.5	15.2	1018.2	71	0	0	19.2	-	-	-			o
2007	8	5	31	21.3	23.6	19	1026.6	65	1.02	1	18.2	20.6	25.9	28.7	o
2008	8	5	31	21.6	24.7	17.1	1021.3	68	7.87	1	17.4	5.4	9.4	-
2009	8	5	31	24.2	26	16.4	1019.7	76	0	0	18.8	17.8	27.8	-
2010	8	5	31	20.5	23.5	14.5	1020.1	82	0	0	26.7	1.9	11.1	-	o
2001	8	6	31	22.4	24.6	15.8	-	69	0	0	20.6	12.4	22.2	25.2	o
2002	8	6	31	22.9	26	14.6	1022.7	74	0	0	23	7.8	13	28.7
2003	8	6	31	-	-	-	-	-	-		-	-	-	-	-	-	-	-	-
2006	8	6	31	20.2	25.6	14.6	1022.1	66	0	0	18.2	-	-	-
2007	8	6	31	21.4	24	15.5	1026.2	56	0	0	22	14.4	20.6	-
2008	8	6	31	20.8	25.1	15.2	1020.7	74	0	0	17.1	5.4	14.8	-
2009	8	6	31	24.4	27.7	18.9	1022.3	80	0	0	21.4	13.9	22.2	-
2010	8	6	31	23.9	25.3	14.2	1021.8	77	0.51	1	17.9	11.9	25.9	-	o
2001	8	7	32	22.8	23.8	16.6	-	61	3.05	1	20.4	17.4	22.2	32.4
2002	8	7	32	23.5	25.4	15.2	1026.3	67	0	0	20.6	13.7	20.6	32.4
2003	8	7	32	-	-	-	-	-	-		-	-	-	-	-	-	-	-	-
2006	8	7	32	21	25.5	13.6	1020.9	71	0	0	17.2	-	-	-
2007	8	7	32	21.9	25	18	-	59	0	0	15.6	8.5	18.3	-
2008	8	7	32	21.2	25.5	15.4	1018.5	78	0	0	18.2	6.3	13	-
2009	8	7	32	23.8	26.5	16.9	1025.2	67	0	0	20.1	16.3	24.1	-
2010	8	7	32	21.9	25.2	15.4	1022.4	76	3.05	1	28.3	1.5	9.4	-
2001	8	8	32	21.4	24	17	1023.2	70	6.1	1	23.8	12	14.4	-
2002	8	8	32	23.4	25	16.1	1028.1	62	0	0	20.6	16.1	25.9	35.9
2003	8	8	32	-	-	-	-	-	-		-	-	-	-	-	-	-	-	-
2006	8	8	32	21.6	26.2	15.4	1019.5	70	0	0	17.5	-	-	-
2007	8	8	32	19.7	22	16.2	1025.3	80	0.51	1	14.5	16.7	35.9	-	o
2008	8	8	32	21.7	26.7	15.9	1020.4	79	0	0	17.5	8.1	18.3	-
2009	8	8	32	22.9	25.7	16.5	1022.2	71	0	0	25.3	10	18.3	-
2010	8	8	32	21.9	26.6	15.2	1019.4	78	0	0	28.3	1.3	7.6	-
2001	8	9	32	-	-	-	-	-	-		-	-	-	-	-	-	-	-
2002	8	9	32	22.6	24.4	19	-	63	0	0	20.6	17.6	22.2	-
2003	8	9	32	-	-	-	-	-	-		-	-	-	-	-	-	-	-	-
2006	8	9	32	21	27.2	14.4	1022.9	75	0	0	18.7	-	-	-
2007	8	9	32	19.8	23.6	16.4	1023.1	74	26.92	1	18.2	8.9	13	-
2008	8	9	32	23.5	26	15.4	-	74	0	0	15.1	8.3	14.8	-				o
2009	8	9	32	21.9	25.2	17	1021.4	74	0	0	29.9	7	11.1	-
2010	8	9	32	24.2	28.6	15.4	1015.6	72	0	0	24.1	12.6	18.3	-
2001	8	10	32	22.5	24	15.8	-	79	0	0	15.9	5.2	7.6	-
2002	8	10	32	23.1	25	15	1024.7	69	2.03	1	20.3	12.4	18.3	21.7	o
2003	8	10	32	-	-	-	-	-	-		-	-	-	-	-	-	-	-	-
2006	8	10	32	21.4	26	16.8	1025.7	73	0	0	16.4	-	-	-
2007	8	10	32	20.7	25.5	12.5	1020.1	69	0	0	17.7	4.6	9.4	21.7
2008	8	10	32	21.5	24.5	18	1026	66	0	0	28.6	21.7	37	-
2009	8	10	32	22.2	26.7	15.1	1019.6	73	0	0	20.6	8.3	18.3	-
2010	8	10	32	21.2	22	15.6	1024.9	61	0	0	15.3	28.7	40.7	51.9	o
2001	8	11	32	-	-	-	-	-	-		-	-	-	-	-	-	-	-
2002	8	11	32	22.7	24.8	22	-	75	4.06	1	16.3	10.4	14.8	-	o
2003	8	11	32	-	-	-	-	-	-		-	-	-	-	-	-	-	-	-
2006	8	11	32	21.3	26.4	15.5	1021.7	78	0	0	18.2	-	-	-	o
2007	8	11	32	22.6	25.4	14.9	1017.7	74	0	0	19.2	12.8	22.2	35.9
2008	8	11	32	21.6	24.7	16.7	1023.9	68	0	0	18	14.3	22.2	-	o
2009	8	11	32	22.8	26.9	15.5	1018.6	71	0	0	23.3	8	18.3	-
2010	8	11	32	19.1	20	14.4	1034.1	64	2.03	1	21.7	23.3	35.2	-	o
2001	8	12	32	-	-	-	-	-	-		-	-	-	-	-	-	-	-
2002	8	12	32	24.2	26.1	21	-	68	0	0	18	14.3	18.3	-
2003	8	12	32	-	-	-	-	-	-		-	-	-	-	-	-	-	-	-
2006	8	12	32	22.8	29	17	1016.4	76	0	0	16.6	-	-	-
2007	8	12	32	23.7	28	20	1018	68	0	0	16.9	13.7	18.3	32.4
2008	8	12	32	20.4	25.3	16	1019.4	77	0.51	1	18.7	7	18.3	-
2009	8	12	32	24.3	26	14.5	1014.4	70	0	0	26.2	17	27.8	-
2010	8	12	32	20.3	21.8	12.2	1032.1	60	5.08	1	22.9	15.2	18.3	-	o
2001	8	13	32	22.2	26.4	18	1018.1	62	0	0	18.8	11.3	35.9	-
2002	8	13	32	25.8	26.6	24.6	-	-	0	0	20.6	25.4	25.9	-
2003	8	13	32	-	-	-	-	-	-		-	-	-	-	-	-	-	-	-
2006	8	13	32	22.5	28.7	20	1023	81	0	0	17.7	-	-	-
2007	8	13	32	24.4	27.3	22	1017.6	64	0	0	21.4	10.2	13	-
2008	8	13	32	21.8	25	15.3	1017.6	71	0	0	17.9	7.4	14.8	-
2009	8	13	32	23.4	26.2	18.1	1014.7	66	0	0	22.5	24.8	40.7	-
2010	8	13	32	19	21.9	12.9	1029.2	71	0.51	1	22.5	7.8	14.8	-	o
2001	8	14	33	22.8	25	16.8	1016.9	76	0	0	18.3	18.9	27.8	-
2002	8	14	33	24.8	26.2	17.8	-	82	0	0	18.7	15.4	24.1	32.4
2003	8	14	33	-	-	-	-	-	-		-	-	-	-	-	-	-	-	-
2006	8	14	33	23.1	26.5	18.1	1021.8	76	0	0	15.6	-	-	-
2007	8	14	33	24.1	27.5	17.4	1013.7	76	0	0	16.7	13.3	22.2	35.9
2008	8	14	33	22.9	26	16.7	1017.8	78	0	0	16.9	7.6	14.8	-
2009	8	14	33	22.7	25.3	15.5	1022	58	0	0	19.6	20.4	37	-	o
2010	8	14	33	20.4	24.7	11.6	1024	64	0	0	22	0	-	-
2001	8	15	33	23.9	26.2	17.5	-	70	0	0	24.9	4.3	9.4	-
2002	8	15	33	25.3	26.4	19	1020.1	82	0	0	23.8	20	25.9	28.7
2003	8	15	33	-	-	-	-	-	-		-	-	-	-	-	-	-	-	-
2006	8	15	33	23.4	26.2	19.9	1018.4	73	0	0	15.4	-	-	-
2007	8	15	33	24.7	29	18.9	1006.3	78	0	0	19.6	19.6	25.9	35.9
2008	8	15	33	22.8	26	17.2	1017.3	81	0	0	15.9	11.7	22.2	-				o
2009	8	15	33	-	-	-	-	-	-		-	-	-	-	-	-	-	-
2010	8	15	33	-	-	-	-	-	-		-	-	-	-	-	-	-	-
2001	8	16	33	23.3	25.6	18.2	-	81	0	0	15.6	7.4	14.8	32.4
2002	8	16	33	-	-	-	-	-	-		-	-	-	-	-	-	-	-
2003	8	16	33	-	-	-	-	-	-		-	-	-	-	-	-	-	-	-
2006	8	16	33	23.7	27.5	19.1	1017	75	0	0	17.1	-	-	-
2007	8	16	33	22.4	25.4	19	1016.8	64	2.03	1	13.7	28.2	74.1	-	o
2008	8	16	33	23.6	26.8	17.5	1013.1	83	0	0	24.8	10.7	24.1	-
2009	8	16	33	20.2	23	14.5	1025.5	72	0	0	17.7	18	33.5	-	o
2010	8	16	33	21.8	25.7	13.2	1023	72	0	0	28.3	8.9	18.3	-
2001	8	17	33	23.9	25.2	18	-	76	0	0	20.3	13.7	18.3	21.7
2002	8	17	33	25.2	27.4	16.6	1022.8	71	0	0	26.2	13.9	18.3	35.9
2003	8	17	33	-	-	-	-	-	-		-	-	-	-	-	-	-	-	-
2006	8	17	33	21.8	25.7	18.5	1023.6	71	0	0	17.4	-	-	-
2007	8	17	33	20.9	24.2	15.9	1024.6	66	0	0	19	11.9	22.2	32.4
2008	8	17	33	21.9	24.4	19	1022.5	78	0	0	27	20.7	25.9	-
2009	8	17	33	22.3	24.6	15.5	1023.4	60	3.05	1	19.2	19.1	27.8	-
2010	8	17	33	23.3	28	14.1	1024	66	0	0	18.8	12.2	18.3	-
2001	8	18	33	23.9	26.7	17.2	-	77	0	0	20.6	5.9	13	28.7
2002	8	18	33	24.8	26	17	-	65	0	0	26.2	12.6	18.3	-
2003	8	18	33	-	-	-	-	-	-		-	-	-	-	-	-	-	-	-
2006	8	18	33	21.4	26.5	16.3	1021	73	0	0	17.1	-	-	-
2007	8	18	33	20.9	24	15.5	1027	69	0	0	18.2	9.3	18.3	35.9
2008	8	18	33	21.1	24	17.8	1025.2	65	0	0	18.2	19.6	31.3	-
2009	8	18	33	22.1	25	15	1019.7	64	3.05	1	19.8	13.5	27.8	-
2010	8	18	33	21.7	25.7	12	1017.7	69	0	0	28.3	6.9	14.8	-
2001	8	19	33	26.4	32.3	18	1020	71	0	0	26.2	11.3	18.3	25.2
2002	8	19	33	24	26	16.6	1021	70	0	0	20.6	9.3	18.3	32.4
2003	8	19	33	-	-	-	-	-	-		-	-	-	-	-	-	-	-	-
2006	8	19	33	22.5	27	17	1018.5	77	0	0	17.5	-	-	-
2007	8	19	33	19.6	24.6	13.2	1023	70	0	0	24	6.1	13	35.9	o
2008	8	19	33	20.8	25	14.6	1021.6	65	0	0	19.2	6.5	13	-
2009	8	19	33	22	24.5	14.9	1015	72	0	0	20.6	17.6	25.9	-
2010	8	19	33	22.8	26.1	12.2	1013.8	75	0	0	28.3	14.8	22.2	-
2001	8	20	33	25.8	27	20	-	72	0	0	18.7	14.4	27.8	35.9
2002	8	20	33	23.9	25.8	16.4	1022.6	68	0	0	20.6	12.4	18.3	28.7
2003	8	20	33	-	-	-	-	-	-		-	-	-	-	-	-	-	-	-
2006	8	20	33	22.7	27	19	1020.7	69	0	0	19.2	-	-	-
2007	8	20	33	21.9	25.9	14	1022.2	66	0	0	15.4	8.5	18.3	28.7
2008	8	20	33	20.9	25	15.2	1021.3	75	0	0	17.4	5.4	13	-
2009	8	20	33	20.7	24.7	14.8	1015.2	68	0	0	22.2	18.9	37	-
2010	8	20	33	-	-	-	-	-	-		-	-	-	-	-	-	-	-
2001	8	21	34	25.9	27.6	20.1	-	73	0	0	19.2	21.1	27.8	32.4
2002	8	21	34	24	26	16.6	-	73	0	0	15.9	11.1	20.6	-
2003	8	21	34	-	-	-	-	-	-		-	-	-	-	-	-	-	-	-
2006	8	21	34	22.5	26.5	16.8	1022.1	71	0	0	15.9	-	-	-	o
2007	8	21	34	22.1	26	17.5	-	68	0	0	14.3	6.7	18.3	-
2008	8	21	34	21.8	25.4	15	1023.6	69	0	0	22.9	8.5	14.8	-
2009	8	21	34	21.3	26.4	13.2	1019.6	66	0	0	22.2	11.7	31.3	-
2010	8	21	34	21.4	24	14.3	1021.1	53	0	0	29.9	8.7	13	-
2001	8	22	34	25.8	27.8	20	-	78	0	0	22.2	18.3	22.2	-
2002	8	22	34	24.7	27.4	16.7	-	70	0	0	18.3	9.1	14.8	32.4
2003	8	22	34	-	-	-	-	-	-		-	-	-	-	-	-	-	-	-
2006	8	22	34	23.1	27	17.8	1018.7	72	3.05	1	16.6	-	-	-
2007	8	22	34	23.2	27.2	16	1020.3	76	0	0	19	9.1	16.5	35.9
2008	8	22	34	21.7	25	15.4	1023	69	0	0	19.3	9.8	14.8	-
2009	8	22	34	22.2	24.5	13.2	1021	61	0	0	19.3	20.7	27.8	-
2010	8	22	34	20.6	24.4	10.9	1016.5	64	0	0	29.9	11.7	25.9	-
2001	8	23	34	25.6	27	20	-	80	0	0	20.4	14.4	20.6	32.4
2002	8	23	34	24.6	26.7	15.6	1021.2	71	0	0	20.6	10.6	14.8	32.4
2003	8	23	34	-	-	-	-	-	-		-	-	-	-	-	-	-	-	-
2006	8	23	34	23.1	27	18.6	1020	76	0	0	19.8	-	-	-
2007	8	23	34	23.8	27	16.6	1015.3	73	0	0	18	17	24.1	32.4
2008	8	23	34	22.9	26	15	1021.7	65	0	0	20	10.4	20.6	-
2009	8	23	34	21.8	25.1	14.3	1020.3	67	0	0	22.2	10	18.3	-
2010	8	23	34	23.1	26.2	14.9	1015.5	73	0	0	23.2	16.1	22.2	-
2001	8	24	34	25.6	26.4	20	-	75	0	0	20.4	24.4	37	74.1
2002	8	24	34	25.6	27	17	1018.7	77	0	0	20.6	17.8	24.1	32.4
2003	8	24	34	-	-	-	-	-	-		-	-	-	-	-	-	-	-	-
2006	8	24	34	23.8	27.4	18	1016.4	76	0	0	19.3	-	-	-
2007	8	24	34	-	-	-	-	-	-		-	-	-	-	-	-	-	-
2008	8	24	34	21.6	26.7	15.4	1017.3	72	0	0	22.2	7.6	16.5	-
2009	8	24	34	21.8	26	17.4	1025.1	64	0	0	19.8	22.8	37	-
2010	8	24	34	23.4	26.7	15.7	1023.5	69	0	0	24.8	11.9	27.8	-
2001	8	25	34	-	-	-	-	-	-		-	-	-	-	-	-	-	-
2002	8	25	34	25.6	28	17	-	78	0	0	19.3	11.9	22.2	32.4
2003	8	25	34	-	-	-	-	-	-		-	-	-	-	-	-	-	-	-
2006	8	25	34	23.9	28	19.3	1014.4	78	1.02	1	17.7	-	-	-			o
2007	8	25	34	-	-	-	-	-	-		-	-	-	-	-	-	-	-
2008	8	25	34	23.2	26.3	16.4	1013.2	75	0	0	18	16.5	29.4	-
2009	8	25	34	20.7	23.2	13.8	1024.9	63	0	0	19.2	19.6	37	-
2010	8	25	34	-	-	-	-	-	-		-	-	-	-	-	-	-	-
2001	8	26	34	-	-	-	-	-	-		-	-	-	-	-	-	-	-
2002	8	26	34	26.6	29	19	1019.5	74	0	0	19.6	10.7	20.6	-
2003	8	26	34	-	-	-	-	-	-		-	-	-	-	-	-	-	-	-
2006	8	26	34	22.6	27	19.1	1019.6	74	0	0	16.7	-	-	-	o
2007	8	26	34	-	-	-	-	-	-		-	-	-	-	-	-	-	-
2008	8	26	34	24.3	27	19.7	1013	81	0	0	19.6	18.7	27.8	-
2009	8	26	34	21.7	24.5	12.7	1021.1	58	0	0	19.8	13.7	22.2	-
2010	8	26	34	22.9	25.5	15.7	1019.8	76	0	0	28	3.3	11.1	-
2001	8	27	34	25.6	27.1	20.1	-	74	0	0	17.5	11.7	16.5	28.7
2002	8	27	34	26	27	18.4	1018.3	74	0	0	18.8	8.3	11.1	28.7
2003	8	27	34	-	-	-	-	-	-		-	-	-	-	-	-	-	-	-
2006	8	27	34	22.1	26.2	18.5	1021.9	73	0.25	1	16.7	-	-	-
2007	8	27	34	23.4	26	16.1	1012.8	76	0	0	17.5	17.6	25.9	-
2008	8	27	34	24.7	27	20.4	1015.3	79	0	0	19	11.3	18.3	-
2009	8	27	34	22.8	25	12.4	1020.3	60	0	0	22.5	14.1	22.2	-
2010	8	27	34	24	27.5	21	1017.4	73	0	0	26.2	4.8	9.4	-
2001	8	28	35	25.3	27	20.3	-	63	0	0	18.8	12	18.3	28.7
2002	8	28	35	25.7	28.1	17.1	1018.6	74	0	0	22	13.3	18.3	21.7
2003	8	28	35	-	-	-	-	-	-		-	-	-	-	-	-	-	-	-
2006	8	28	35	21.8	26.8	16.6	1019.4	72	0	0	17.4	-	-	-
2007	8	28	35	-	-	-	-	-	-		-	-	-	-	-	-	-	-
2008	8	28	35	24.5	26	20.3	-	80	0	0	22.5	29.1	44.3	-
2009	8	28	35	21.7	24.2	12.2	1023.5	67	0	0	20.1	27	40.7	-	o
2010	8	28	35	23.2	26	15.5	-	76	0	0	19	5	13	-
[truncated: 1,092 more rows]

## Sheet: Explanations
Column definitions:
T	Mean temperature (ºC)
TM	Maximum temperature (ºC)
Tm	Minimum temperature (ºC)
SLP	Mean sea level pressure (mb)
H	Mean humidity (%)
PP	Precipitation amount (mm)
VV	Mean visibility (Km)
V	Mean wind speed (Km/h)
VM	Maximum sustained wind speed (Km/h)
Vg	Maximum wind gust (Km/h)
RA	Indicator for occurrence of: Rain or Drizzle
SN	Indicator for occurrence of: Snow or Ice Pellets
TS	Indicator for occurrence of: Thunder
FG	Indicator for occurrence of: Fog
Note 2004 for Inhambane missing

## Sheet: daily means paired
	Year	Month	Day	Inhambane	vilanculos	soil	air furvela	soil	air furvela	humidity	Mean	std dev
	2002	1	1	-	27.8
	2002	1	2	-	28.8
	2002	1	3	29	28.4
	2002	1	4	29.1	27.8
	2002	1	5	29.2	28.2
	2002	1	6	30	28.5
	2002	1	7	-	29.1
	2002	1	8	29.6	29.4
	2002	1	9	29.7	29.1
	2002	1	10	-	27.1
	2002	1	11	30.5	29.6
	2002	1	12	29.9	29
	2002	1	13	30.2	30
	2002	1	14	-	29.7
	2002	1	15	-	27.7
	2002	1	16	30	28.9
	2002	1	17	29.6	29.3
	2002	1	18	29.6	29.6
	2002	1	19	-	30
	2002	1	20	-	30.1
	2002	1	21	30.8	29.2
	2002	1	22	30.1	29.7
	2002	1	23	29.6	28.8
	2002	1	24	30.2	30.6
	2002	1	25	29.4	29.5
	2002	1	26	27.2	30.5
	2002	1	27	28.2	27.3
	2002	1	28	29.3	29.4
	2002	1	29	29	29.7
	2002	1	30	30.2	28.6
	2002	1	31	30.5	28.9
	2003	1	1	28.3	-
	2003	1	2	31.2	29.7
	2003	1	3	31.3	29.9
	2003	1	4	31.5	30.4
	2003	1	5	27.9	29.3
	2003	1	6	28.4	29.3
	2003	1	7	28.1	26.2
	2003	1	8	27.3	28.8
	2003	1	9	32	30.6
	2003	1	10	23.9	27.3
	2003	1	11	-	24.1
	2003	1	12	28.4	28.2
	2003	1	13	28.7	26.6
	2003	1	14	29.9	28.7
	2003	1	15	29.9	29.1
	2003	1	16	29.5	29.3
	2003	1	17	29.3	29.4
	2003	1	18	29.9	31.3
	2003	1	19	31.1	30.8
	2003	1	20	30.9	31.1
	2003	1	21	30.9	30.9
	2003	1	22	31.5	30.1
	2003	1	23	30.6	30.7
	2003	1	24	31.4	29.4
	2003	1	25	30.6	30.7
	2003	1	26	30.1	30.2
	2003	1	27	30	29.2
	2003	1	28	29.3	28.1
	2003	1	29	26.9	28.3
	2003	1	30	-	29.7
	2003	1	31	31.3	30.7
	2004	1	1		27.7
	2004	1	2		27.9
	2004	1	3		29.5
	2004	1	4		26.5
	2004	1	5		26.5
	2004	1	6		29.1
	2004	1	7		28.8
	2004	1	8		-
	2004	1	9		29.9
	2004	1	10		31.6
	2004	1	11		30.9
	2004	1	12		30
	2004	1	13		29.4
	2004	1	14		-
	2004	1	15		31.8
	2004	1	16		31.9
	2004	1	17		-
	2004	1	18		29.7
	2004	1	19		29.7
	2004	1	20		29.2
	2004	1	21		26.4
	2004	1	22		29.2
	2004	1	23		29.4
	2004	1	24		28.9
	2004	1	25		30.6
	2004	1	26		32
	2004	1	27		31.9
	2004	1	28		30.4
	2004	1	29		28.3
	2004	1	30		29.8
	2004	1	31		27.3
	2005	1	1		30.1			32.1321	25.7692	86.7883
	2005	1	2		-			33.6304	27.5133	88.7445
	2005	1	3		-			33.9475	26.8321	87.6352
	2005	1	4		30.9			30.0088	24.655	98.1781
	2005	1	5		29.6			26.1013	23.3633	103.185
	2005	1	6		29.4			25.9454	23.9496	97.1885
	2005	1	7		30.6			28.1817	26.6979	95.9765
	2005	1	8		-			29.9658	27.3208	94.2485
	2005	1	9		28.3			30.3404	26.3025	96.1024
	2005	1	10		29.9			29.0054	24.9304	101.284
	2005	1	11		28			29.2633	25.6642	95.0357
	2005	1	12		29.6			29.7529	25.6983	94.7797
	2005	1	13		28.8			29.9154	26.4571	94.3573
	2005	1	14		29.9			30.6208	26.7837	93.2373
	2005	1	15		-			31.6042	27.2513	91.0997
	2005	1	16		-			31.9471	27.0971	95.264
	2005	1	17		26.7			30.9946	27.1029	93.1072
	2005	1	18		28.6			31.4408	26.5429	91.072
	2005	1	19		28.3			32.4292	27.7717	84.5653
	2005	1	20		28.6			29.4671	25.3412	86.9717
	2005	1	21		29.6			28.5133	23.495	85.2779
	2005	1	22		-			29.4508	24.2121	86.7115
	2005	1	23		-			31.0404	24.7163	87.7589
	2005	1	24		28.6			31.8138	25.4129	85.2736
	2005	1	25		30.8			32.9029	25.8046	83.264
	2005	1	26		-			33.7433	26.5192	83.1211
	2005	1	27		29.7			34.4767	26.9913	86.3488
	2005	1	28		-			34.5458	26.6533	84.2368
	2005	1	29		31.2			34.5837	26.2679	85.7856
	2005	1	30		31.5			35.1171	27.3829	82.8544
	2005	1	31		28.8			33.5942	27.5629	91.0229
	2006	1	1	28.8	27.3
	2006	1	2	28.6	29.1
	2006	1	3	28.6	28.1
	2006	1	4	25.4	25.4
	2006	1	5	25.2	27.6					1
	2006	1	6	26.1	27.5
	2006	1	7	27.8	29.4
	2006	1	8	28.2	29.2
	2006	1	9	29.3	-
	2006	1	10	28.1	-
	2006	1	11	-	-
	2006	1	12	29.9	-
	2006	1	13	30.9	-
	2006	1	14	-	-
	2006	1	15	-	-
	2006	1	16	-	-
	2006	1	17	28.9	-
	2006	1	18	29.6	-
	2006	1	19	-	-
	2006	1	20	-	-
	2006	1	21	29.1	27.7
	2006	1	22	29.7	28.2
	2006	1	23	30.2	29
	2006	1	24	-	29.8
	2006	1	25	29.3	29.3
	2006	1	26	29.7	-
	2006	1	27	30.3	30.4
	2006	1	28	29.2	30.9
	2006	1	29	28.8	30.7
	2006	1	30	29	-
	2006	1	31	30.6	31.6
	2007	1	1	24.2	26.5
	2007	1	2	26.7	27.6
	2007	1	3	26.6	24.3
	2007	1	4	27.7	30.1
	2007	1	5	28.1	29.4
	2007	1	6	29.5	31.6
	2007	1	7	29.4	31
	2007	1	8	27.3	28.2
	2007	1	9	27	-
	2007	1	10	27.6	27.8
	2007	1	11	26.2	28.1
	2007	1	12	28	28.3
	2007	1	13	28.6	29.7
	2007	1	14	28.7	30.1
	2007	1	15	30.1	30.3
	2007	1	16	29.2	30.4
	2007	1	17	29.1	27.7
	2007	1	18	29.5	28.2
	2007	1	19	30.3	30.3
	2007	1	20	26.9	28.6
	2007	1	21	26.9	29.8
	2007	1	22	27.6	28.1
	2007	1	23	28.1	29.6
	2007	1	24	27.3	29.2
	2007	1	25	26.6	26.8
	2007	1	26	27.8	30.1
	2007	1	27	28.2	29.2
	2007	1	28	27.9	29.3
	2007	1	29	28.7	-
	2007	1	30	27.3	29.6
	2007	1	31	28.9	29.2
	2008	1	1	28.1	29.1	30.5525	23.7617
	2008	1	2	29.1	29.9	30.9796	24.9463
	2008	1	3	29.3	28.9	32.2879	24.81
	2008	1	4	28.9	29.3	32.9917	24.3154
	2008	1	5	28.8	27.9	33.6742	24.7875
	2008	1	6	27.5	28.4	33.5025	24.9079
	2008	1	7	29.2	28.8	33.1954	25.2158
	2008	1	8	26.2	29.4	32.7754	25.3746
	2008	1	9	24.3	26.7	31.1775	23.5067
	2008	1	10	26.6	24.7	28.3275	22.7558
	2008	1	11	27	27.2	27.5167	22.3663
	2008	1	12	27.3	28.4	28.1596	22.4246
	2008	1	13	29.1	29.4	29.5242	23.1942
	2008	1	14	28.7	30.2	29.9917	23.8288
	2008	1	15	28.7	28.6	29.7929	23.4121
	2008	1	16	29.6	29.5	29.9925	24.33
	2008	1	17	28.6	30.3	30.5158	24.3287
	2008	1	18	25.7	28.8	30.7338	25.2033
	2008	1	19	27.3	28.6	31.0296	25.5158
	2008	1	20	28.4	28.9	32.0087	26.4496
	2008	1	21	28.5	29.7	31.3525	25.2854
	2008	1	22	27.5	28.8	31.2296	25.7325
	2008	1	23	28.8	28.2	30.9838	24.9558
	2008	1	24	28.8	29.1	31.1675	24.0296
	2008	1	25	28.6	28.3	31.145	23.3225
	2008	1	26	27.4	28.2	31.5104	23.315
	2008	1	27	26	27.4	30.9679	23.3892
	2008	1	28	28.7	28.3	32.0575	24.4658
	2008	1	29	28.2	28.4	33.2396	25.0463
	2008	1	30	28.4	28	33.5992	25.1962
	2008	1	31	28.2	28.3	33.7737	25.1083
	2009	1	1	26.3	-	30.4237	24.9221
	2009	1	2	26	-	32.2017	26.49
	2009	1	3	26.2	-	33.2079	26.3033
	2009	1	4	28.6	-	33.8188	25.9658
	2009	1	5	28.3	-	33.4012	25.1658
	2009	1	6	28.9	28	32.5896	24.1921
	2009	1	7	29.3	29.4	32.9838	24.1746
	2009	1	8	30.2	29.5	30.8946	23.5667
	2009	1	9	29.7	29.9	27.8217	22.2954
	2009	1	10	30.1	29.6	28.7454	24.5662
	2009	1	11	29	30.6	30.0454	24.2496
	2009	1	12	29.3	29.1	31.4108	24.4175
	2009	1	13	29.1	29.3	32.7692	25.7242
	2009	1	14	29	29.7	34.1608	26.9283
	2009	1	15	29.4	29.6	34.3171	25.7267
	2009	1	16	29.6	30.2	34.7592	26.3954
	2009	1	17	30.6	30.3	33.1387	25.5088
	2009	1	18	-	-	30.4275	24.2167
	2009	1	19	30.9	31.9	30.165	24.5125
	2009	1	20	27.6	28.8	30.8721	24.5587
	2009	1	21	27.3	27.7	31.885	25.2738
	2009	1	22	28.1	-	31.9917	24.4771
	2009	1	23	29.3	29.7	32.1692	24.81
	2009	1	24	28.9	-	30.9533	25.5962
	2009	1	25	29.6	30.3	30.8979	26.3879
	2009	1	26	29	29.3	29.9492	24.2996
	2009	1	27	29.7	30.4	29.4992	23.8096
	2009	1	28	31	30.6	30.1125	24.3387
	2009	1	29	-	30.3	30.8733	24.5929
	2009	1	30	-	29.8	31.1129	23.8604
	2009	1	31	-	31.3	30.5525	23.7617
	2010	1	1	28.4	-
	2010	1	2	29.6	30.6
	2010	1	3	29.1	28.5
	2010	1	4	29.6	30.3
	2010	1	5	29.3	29.6
	2010	1	6	-	-
	2010	1	7	28.7	-
	2010	1	8	28.4	28.7
	2010	1	9	29.6	27.9
	2010	1	10	29.6	27.4
	2010	1	11	29.1	29.2
	2010	1	12	-	-
	2010	1	13	29.8	29.1
	2010	1	14	29.3	29.1
	2010	1	15	29.5	28.6
	2010	1	16	30	29.1
	2010	1	17	-	29.9
	2010	1	18	29.4	27.2
	2010	1	19	30.1	29.8
	2010	1	20	30.1	29.9
	2010	1	21	29.7	29.3
	2010	1	22	30.2	29.6
	2010	1	23	29.9	29.2
	2010	1	24	30.6	29.9
	2010	1	25	28.8	-
	2010	1	26	28.9	29.3
	2010	1	27	28.4	30.5
	2010	1	28	31.4	30.6
	2010	1	29	27.2	27.8
	2010	1	30	27.1	22.9
	2010	1	31	29.7	27.4
	2001	2	1	-	-
	2001	2	2	-	-
	2001	2	3	-	-
	2001	2	4	-	-
	2001	2	5	-	26.4
	2001	2	6	28.7	29.4
	2001	2	7	29.9	29.1
	2001	2	8	-	-
	2001	2	9	-	28.7
	2001	2	10	-	-
	2001	2	11	-	-
	2001	2	12	28.1	26.4
	2001	2	13	28.6	28.1
	2001	2	14	27.2	27.1
	2001	2	15	25.1	24.9
	2001	2	16	-	-
	2001	2	17	-	-
	2001	2	18	-	-
	2001	2	19	28.8	29
	2001	2	20	28.5	29.5
	2001	2	21	-	-
	2001	2	22	-	-
	2001	2	23	-	-
	2001	2	24	-	-
	2001	2	25	28.9	29.7
	2001	2	26	-	30
	2001	2	27	-	-
	2001	2	28	-	-
	2002	2	1	30.5	30.5
	2002	2	2	-	27.8
	2002	2	3	-	28.3
	2002	2	4	29.3	30.5
	2002	2	5	29.8	29.8
	2002	2	6	30.4	30
	2002	2	7	-	30.6
	2002	2	8	26.4	27.8
	2002	2	9	-	27.4
	2002	2	10	-	28.2
	2002	2	11	30.2	30.4
	2002	2	12	29.4	30.1
	2002	2	13	29.6	29.6
	2002	2	14	30.9	30.5
	2002	2	15	31.1	29.9
	2002	2	16	30.9	29.3
	2002	2	17	26.4	-
	2002	2	18	27.8	28.2
	2002	2	19	26.2	26.1
	2002	2	20	-	26.6
	2002	2	21	29.3	29.1
	2002	2	22	29.1	29.4
	2002	2	23	-	-
	2002	2	24	29.9	-
	2002	2	25	28.3	28.6
	2002	2	26	28.2	26.9
	2002	2	27	29.5	27.9
	2002	2	28	-	29.8
	2003	2	1	30	29.9
	2003	2	2	30.9	31.9
	2003	2	3	30.9	29.3
	2003	2	4	-	30.2
	2003	2	5	31.6	31.6
	2003	2	6	29.2	29.8
	2003	2	7	30.4	29.8
	2003	2	8	-	29.8
	2003	2	9	30.4	31.7
	2003	2	10	29.3	30.9
	2003	2	11	28.1	28
	2003	2	12	-	29.5
	2003	2	13	30	28.9
	2003	2	14	30.2	30
	2003	2	15	30.9	30.2
	2003	2	16	30.3	30.6
	2003	2	17	30.7	29.5
	2003	2	18	30.2	30.8
	2003	2	19	30.8	30.8
	2003	2	20	31.6	30.9
	2003	2	21	27.6	27.9
	2003	2	22	-	-
	2003	2	23	29.8	28.2
	2003	2	24	29.6	30.1
	2003	2	25	30.2	27.4
	2003	2	26	29.9	29.2
	2003	2	27	25.9	29.1
	2003	2	28	-	26.8
	2004	2	1		30.4
	2004	2	2		27.9
	2004	2	3		25
	2004	2	4		26.9
	2004	2	5		28.7
	2004	2	6		27.8
	2004	2	7		27.8
	2004	2	8		26.2
	2004	2	9		27.8
	2004	2	10		26.4
	2004	2	11		27.1
	2004	2	12		28.5
	2004	2	13		29.4
	2004	2	14		29.8
	2004	2	15		30.1
	2004	2	16		30.3
	2004	2	17		29.6
	2004	2	18		29.9
	2004	2	19		29
	2004	2	20		29
	2004	2	21		27.6
	2004	2	22		28.8
	2004	2	23		29.7
	2004	2	24		31.3
	2004	2	25		30.7
	2004	2	26		30.7
	2004	2	27		27.9
	2004	2	28		28.9
	2004	2	29		27.6
	2005	2	1		30.1			28.8417	24.0921	103.145
	2005	2	2		29.3			28.7683	25.9867	92.6251
	2005	2	3		27.6			29.8767	26.24	80.7168
	2005	2	4		-			31.0267	25.7487	81.3696
	2005	2	5		-			31.4892	25.1712	88.6229
	2005	2	6		27.4			32.1712	26.0092	84.5227
	2005	2	7		27			30.5717	25.6988	99.8805
	2005	2	8		28.7			28.4479	25.8996	100.928
	2005	2	9		27.8			30.1417	27.4238	94.8075
	2005	2	10		-			31.6683	27.8229	93.5851
	2005	2	11		29.1			32.5504	27.3021	92.224
	2005	2	12		-			33.1775	27.1188	94.6624
	2005	2	13		-			33.67	27.1646	90.7584
	2005	2	14		28.8			33.9083	26.7825	91.9403
	2005	2	15		28.9			34.0158	26.9017	87.6075
	2005	2	16		29.2			34.2	26.5088	86.5472
	2005	2	17		28.9			34.485	27.0504	85.5915
	2005	2	18		30.1			34.7858	27.4096	80.9408
	2005	2	19		30.7			34.6771	26.7004	85.0816
	2005	2	20		-			34.4329	25.8158	87.4048
	2005	2	21		29.7			34.2742	26.2208	82.8587
	2005	2	22		-			33.6613	26.4142	90.3616
	2005	2	23		31.4			33.3925	27.46	86.5429
	2005	2	24		29.5			33.5492	25.9571	89.4421
	2005	2	25		30.2			34.3792	27.3733	83.4539
	2005	2	26		27.9			33.85	27.265	87.456
	2005	2	27		28.4			33.5796	26.5629	89.6619
	2005	2	28		28.5			33.8675	27.33	93.1179
	2006	2	1	24.5	25.6
	2006	2	2	26.2	-
	2006	2	3	28.2	-
	2006	2	4	27	-
	2006	2	5	28.4	-
	2006	2	6	28.9	29.4
	2006	2	7	27.4	28.4
	2006	2	8	27.8	29.7
	2006	2	9	29.2	30.3
	2006	2	10	29.8	30.7
	2006	2	11	29.8	29.3
	2006	2	12	29.1	29.8
	2006	2	13	30.1	30.5
	2006	2	14	29.1	30.6
	2006	2	15	30.1	30.4
	2006	2	16	30	31.1
	2006	2	17	29.6	31.2
	2006	2	18	29.2	30.1
	2006	2	19	29.1	29.3
	2006	2	20	29.2	30.1
	2006	2	21	29.7	30.3
	2006	2	22	28.3	27.4
	2006	2	23	30	31.1
	2006	2	24	27.7	29.9
	2006	2	25	28.4	30
	2006	2	26	28.8	28.7
	2006	2	27	30.5	30
	2006	2	28	30.4	30.4
	2007	2	1	27.7	28.3
	2007	2	2	28.2	28.6
	2007	2	3	28.2	28.4
	2007	2	4	29.4	29.4
	2007	2	5	28.8	30
	2007	2	6	26.6	25.9
	2007	2	7	29.8	30.4
	2007	2	8	30.2	30.4
	2007	2	9	28.9	29.9
	2007	2	10	29.1	30.2
	2007	2	11	30.6	30.3
	2007	2	12	27.8	27.9
	2007	2	13	28.2	27.5
	2007	2	14	27.7	29.3
	2007	2	15	26.9	27.6
	2007	2	16	28.1	28.7
	2007	2	17	28.7	28.2
	2007	2	18	26.8	28.7
	2007	2	19	27.6	26.7
	2007	2	20	-	27.8
	2007	2	21	29.2	30.1
	2007	2	22	28.3	-
	2007	2	23	28.8	-
	2007	2	24	27.3	-
	2007	2	25	27.9	-
	2007	2	26	27.8	-
	2007	2	27	27.7	-
	2007	2	28	27.2	-
	2008	2	1	29.1	28.1	34.1808	25.5308
	2008	2	2	28.1	27.6	34.2188	26.4017
	2008	2	3	28.7	26.9	34.5383	26.5729
	2008	2	4	29.6	29.9	34.4325	26.3592
	2008	2	5	28.7	26.9	33.9167	25.3342
	2008	2	6	28.8	27.6	33.8337	26.0792
	2008	2	7	29.1	27.9	33.8092	24.6208
	2008	2	8	26.9	28.2	33.4417	24.4275
	2008	2	9	25.7	26.2	32.9092	24.6692
	2008	2	10	25.2	27.5	33.6483	25.1154
	2008	2	11	27.4	26.6	33.2354	25.1733
	2008	2	12	26.4	27.3	32.4721	24.8217
	2008	2	13	28.8	28.2	32.8888	25.4896
	2008	2	14	26.2	27.4	33.4117	25.6887
	2008	2	15	27.1	27.9	30.3233	21.5083
	2008	2	16	27.6	28.9	28.2442	22.2133
	2008	2	17	28.3	28.5	28.2583	21.1408
	2008	2	18	28.8	29.4	27.1117	20.5904
	2008	2	19	28.9	30.1	28.1313	21.7633
	2008	2	20	27.9	28.4	28.8054	22.185
	2008	2	21	28.8	29.4	28.9875	22.2692
	2008	2	22	28.1	29	30.0296	22.6442
	2008	2	23	28.8	29.3	28.4642	21.0029
	2008	2	24	28.9	27.7	27.8413	21.7996
	2008	2	25	27.9	26.9	27.0767	20.7346
	2008	2	26	27.4	27.6	27.2892	20.5329
	2008	2	27	28.9	29.1	27.9929	19.7675
	2008	2	28	29.6	29.2	28.8304	20.4104
	2008	2	29	27.9	28.9	28.94	20.4287
	2009	2	1	-	28.6	30.9796	24.9463
	2009	2	2	-	30.4	32.2879	24.81
	2009	2	3	-	29.8	32.9917	24.3154
	2009	2	4	-	30.4	33.6742	24.7875
	2009	2	5	-	28.7	33.5025	24.9079
	2009	2	6	-	-	33.1954	25.2158
	2009	2	7	-	-	32.7754	25.3746
	2009	2	8	-	27	31.1775	23.5067
	2009	2	9	28	28.4	28.3275	22.7558
	2009	2	10	29.3	-	27.5167	22.3663
	2009	2	11	-	-	28.1596	22.4246
	2009	2	12	-	-	29.5242	23.1942
	2009	2	13	-	27.9	29.9917	23.8288
	2009	2	14	-	-	29.7929	23.4121
	2009	2	15	-	-	29.9925	24.33
	2009	2	16	-	-	30.5158	24.3287
	2009	2	17	-	-	30.7338	25.2033
	2009	2	18	-	-	31.0296	25.5158
	2009	2	19	-	29.1	32.0087	26.4496
	2009	2	20	-	30.3	31.3525	25.2854
	2009	2	21	-	28.8	31.2296	25.7325
	2009	2	22	-	28.4	30.9838	24.9558
	2009	2	23	-	-	31.1675	24.0296
	2009	2	24	-	-	31.145	23.3225
	2009	2	25	-	28.1	31.5104	23.315
	2009	2	26	-	-	30.9679	23.3892
	2009	2	27	-	-	32.0575	24.4658
	2009	2	28	-	-	33.2396	25.0463
	2010	2	1	30.4	28.9
	2010	2	2	28.9	29.5
	2010	2	3	29	29.9
	2010	2	4	29.4	29.3
	2010	2	5	29.3	29.8
	2010	2	6	29.3	29
	2010	2	7	29.1	28.8
	2010	2	8	29.9	29.6
	2010	2	9	29.9	29.2
	2010	2	10	29.3	27.9
	2010	2	11	29.7	28.8
	2010	2	12	29.9	29.1
	2010	2	13	30.4	30
	2010	2	14	30.8	29.6
	2010	2	15	28.7	28.6
	2010	2	16	30.6	29.4
	2010	2	17	30.7	30.4
	2010	2	18	26.7	25.8
	2010	2	19	28.9	27.7
	2010	2	20	30.1	29
	2010	2	21	28.4	27.9
	2010	2	22	29.7	29.3
	2010	2	23	30.1	30.1
	2010	2	24	29	29.3
	2010	2	25	29.6	28.4
	2010	2	26	29.7	29.1
	2010	2	27	26.3	26.3
	2010	2	28	29.5	26.1
	2001	3	1	-	-
	2001	3	2	-	-
	2001	3	3	-	-
	2001	3	4	-	-
	2001	3	5	-	-
	2001	3	6	-	28.5
	2001	3	7	28.7	27.8
	2001	3	8	30.1	28.4
	2001	3	9	28.8	30.1
	2001	3	10	-	-
	2001	3	11	31	30.6
	2001	3	12	30.9	29.7
	2001	3	13	26.2	28.1
	2001	3	14	26.1	-
	2001	3	15	24.4	25.1
	2001	3	16	-	-
	2001	3	17	-	-
	2001	3	18	-	-
	2001	3	19	-	27.4
	2001	3	20	27.9	-
	2001	3	21	-	-
	2001	3	22	-	-
	2001	3	23	-	-
	2001	3	24	-	-
	2001	3	25	-	-
	2001	3	26	-	-
	2001	3	27	-	-
	2001	3	28	-	-
	2001	3	29	-	-
	2001	3	30	-	-
	2001	3	31	-	-
	2002	3	1	30.5	30.5
	2002	3	2	31.2	-
	2002	3	3	-	29.2
	2002	3	4	29.9	29.8
	2002	3	5	30.1	30
	2002	3	6	29.9	27.8
	2002	3	7	30.8	29.8
	2002	3	8	29.7	29.8
	2002	3	9	27.5	25.9
	2002	3	10	27.6	-
	2002	3	11	29.2	26.7
	2002	3	12	29.8	27.2
	2002	3	13	30.6	28.1
	2002	3	14	30.8	28
	2002	3	15	28.6	28.5
	2002	3	16	27.3	25.8
	2002	3	17	28.5	26.3
	2002	3	18	28.2	27.8
	2002	3	19	29.8	28.2
	2002	3	20	31.1	30.4
	2002	3	21	30.1	28.9
	2002	3	22	29.9	28.2
	2002	3	23	29.6	28.6
	2002	3	24	28.6	28.6
	2002	3	25	27.3	26.9
	2002	3	26	26	26.8
	2002	3	27	28.6	27.8
	2002	3	28	29.4	29.7
	2002	3	29	25.8	27.8
	2002	3	30	27.6	28.1
	2002	3	31	27.9	27.3
	2003	3	1	-	-
	2003	3	2	25.6	24.8
	2003	3	3	27.7	-
	2003	3	4	28.8	-
	2003	3	5	29.3	-
	2003	3	6	28.9	28.1
	2003	3	7	-	27.5
	2003	3	8	28.8	27.9
	2003	3	9	28.8	24.9
	2003	3	10	28.8	27.7
	2003	3	11	27.7	27
	2003	3	12	28.1	27.1
	2003	3	13	28.4	28.1
	2003	3	14	29.1	28.3
	2003	3	15	30.2	27.9
	2003	3	16	-	28.6
	2003	3	17	30.3	29.7
	2003	3	18	30.1	29.3
	2003	3	19	-	29.3
	2003	3	20	29.7	28.6
	2003	3	21	29.6	29.4
	2003	3	22	30.2	30.2
	2003	3	23	30.4	30.7
	2003	3	24	29.3	29.8
	2003	3	25	29.1	27.8
	2003	3	26	28.8	27.4
	2003	3	27	28.4	27.4
	2003	3	28	28.2	27.6
	2003	3	29	-	27.9
	2003	3	30	-	27.7
	2003	3	31	28.4	27.1
	2004	3	1		26.7
	2004	3	2		27.6
	2004	3	3		27.3
	2004	3	4		29.8
	2004	3	5		30.6
	2004	3	6		27.8
	2004	3	7		28.9
	2004	3	8		28.5
	2004	3	9		28.4
	2004	3	10		28.6
	2004	3	11		29.2
	2004	3	12		27.6
	2004	3	13		-
	2004	3	14		25.7
	2004	3	15		25.9
	2004	3	16		27
	2004	3	17		28
	2004	3	18		-
	2004	3	19		28.8
	2004	3	20		30
	2004	3	21		28.8
	2004	3	22		-
	2004	3	23		30.2
	2004	3	24		29.9
	2004	3	25		29.8
	2004	3	26		26.2
	2004	3	27		-
	2004	3	28		29.7
	2004	3	29		27.9
	2004	3	30		-	32.3588	26.9525
	2004	3	31		28.8	31.155	24.9154
	2005	3	1		29.8			31.3454	25.7346	101.769
	2005	3	2		28.7			33.0592	27.4417	91.0933
	2005	3	3		28.7			33.555	26.9288	91.2725
	2005	3	4		29.3			27.8333	23.0579	101.259
	2005	3	5		-			26.4579	23.6121	99.3643
	2005	3	6		-			26.7342	24.5304	98.2741
	2005	3	7		29.9			28.0725	25.2471	97.12
	2005	3	8		30.7			28.9871	25.1771	85.9904
	2005	3	9		30.6			27.2662	22.5154	97.9307
	2005	3	10		30.8			28.2975	23.7025	87.0549
	2005	3	11		27.7			29.5592	23.8733	88.6059
	2005	3	12		-			30.5033	25.2104	91.6821
	2005	3	13		28.1			31.1329	26.0362	95.7013
	2005	3	14		28.8			27.5796	24.6067	102.379
	2005	3	15		27.7			28.1083	25.4396	98.2635
	2005	3	16		24.8			29.6937	25.5521	90.3445
	2005	3	17		25.9			31.2179	26.3592	90.8075
	2005	3	18		26.3			32.2904	26.5387	90.4725
	2005	3	19		27.8			32.1729	25.8492	93.1307
	2005	3	20		27.3			33.0238	26.7771	92.2176
	2005	3	21		28.1			33.4129	27.0583	88.5269
	2005	3	22		27.8			33.1158	25.8388	85.6875
	2005	3	23		25.6			30.1442	24.7262	98.9845
	2005	3	24		-			29.1579	24.6121	85.7472
	2005	3	25		-			28.7367	24.9883	88.9856
	2005	3	26		-			29.0817	25.4725	96.192
	2005	3	27		28.3			29.1496	25.2738	98.3424
	2005	3	28		-			27.5283	23.8421	99.6949
	2005	3	29		27.4			25.7667	22.14	103.27
	2005	3	30		28.4			25.9354	23.25	99.4027
	2005	3	31		27.2			27.0529	23.9008	91.2171
	2006	3	1	27.3	30.8
	2006	3	2	29.2	30.2
	2006	3	3	28.7	29.6
	2006	3	4	24.7	26.6
	2006	3	5	25.2	24.6
	2006	3	6	26.1	25.8
	2006	3	7	26.9	26.7
	2006	3	8	27.8	28.2
	2006	3	9	25.6	26.4
	2006	3	10	26.9	27.5
	2006	3	11	27.8	28.6
	2006	3	12	28.2	28.2
	2006	3	13	28.4	30.3
	2006	3	14	24.9	27.9
	2006	3	15	26.7	28.8
	2006	3	16	27.9	29
	2006	3	17	28.9	28.8
	2006	3	18	29	29.2
	2006	3	19	29.6	29.4
	2006	3	20	29.1	29.2
	2006	3	21	29.1	29.2
	2006	3	22	27.9	29.3						72.5714	4.05186
	2006	3	23	26.4	28.4						71	2.82843
	2006	3	24	26.9	24.5						71.2857	2.71971
	2006	3	25	27.6	25.3						71.4	3.43511
	2006	3	26	26.4	27.8						71.5645	4.05948
	2006	3	27	28.3	28.9						71.9375	3.62494
	2006	3	28	25.4	25.7
	2006	3	29	24.7	23.1
	2006	3	30	25.4	25
	2006	3	31	25.7	26.8
	2007	3	1	28.2
	2007	3	2	28
	2007	3	3	25.9
	2007	3	4	28.2
	2007	3	5	27.8
	2007	3	6	27.6
	2007	3	7	28.1
	2007	3	8	-
	2007	3	9	26.1
	2007	3	10	26.7
	2007	3	11	27.3
	2007	3	12	27.7
	2007	3	13	28
	2007	3	14	27.8
	2007	3	15	28.2
	2007	3	16	28.6
	2007	3	17	29.3
	2007	3	18	26
	2007	3	19	24.7
	2007	3	20	25.9
	2007	3	21	28.8
	2007	3	22	29.4
	2007	3	23	29.1
	2007	3	24	28.4
	2007	3	25	28.7
	2007	3	26	28.1
	2007	3	27	28.5
	2007	3	28	27.1
	2007	3	29	27.7
	2007	3	30	24
	2007	3	31	23.9
	2008	3	1	29.2	28.4	29.1913	20.8788
	2008	3	2	30.2	29.3	28.8633	19.7462
	2008	3	3	29.1	29	27.5654	19.575
	2008	3	4	29.9	29.2	26.5188	19.0321
	2008	3	5	28.7	29.2	25.5629	18.4279
	2008	3	6	29.2	28.5	26.6575	18.0263
	2008	3	7	29.1	27.9	27.4492	19.7067
	2008	3	8	28.1	28.8	28.62	21.7375
	2008	3	9	26.9	27.8	28.7954	21.5504
	2008	3	10	27.9	28.3	28.5617	21.705
	2008	3	11	28.3	27.3	28.3608	19.3146
	2008	3	12	29.7	26.3	28.45	19.2367
	2008	3	13	27.9	25.7	28.6083	19.9854
	2008	3	14	27.8	24.1	28.3158	19.7
	2008	3	15	29.3	-	26.2196	19.97
	2008	3	16	24.4	-	26.4913	19.8163
	2008	3	17	25.8	-	27.2037	19.6783
	2008	3	18	24.8	24.6	27.7667	19.7038
	2008	3	19	25.8	26.1	28.4325	20.4733
	2008	3	20	26.1	-	28.0138	20.0488
	2008	3	21	26.8	24.8	28.6721	21.9617
	2008	3	22	26.7	-	28.0742	21.7279
	2008	3	23	26.8	-	24.3667	18.7221
	2008	3	24	23.8	-	24.2758	17.8529
	2008	3	25	26.3	25.9	25.4908	18.1413
	2008	3	26	26.3	24.8	25.7783	16.9525
	2008	3	27	26.1	25.9	25.5871	17.2054
	2008	3	28	25.6	25.6	25.7996	17.4037
	2008	3	29	26.6	25.2	25.775	16.5546
	2008	3	30	25.2	24.6	25.0054	17.5879
	2008	3	31	25.4	25.1	25.1575	17.7667
	2009	3	1		-	33.5992	25.1962
	2009	3	2		-	33.7737	25.1083
	2009	3	3		-	34.1808	25.5308
	2009	3	4		27.3	34.2188	26.4017
	2009	3	5		27.7	34.5383	26.5729
	2009	3	6		27.8	34.4325	26.3592
	2009	3	7		26.4	33.9167	25.3342
	2009	3	8		28.5	33.8337	26.0792
	2009	3	9		28.5	33.8092	24.6208
	2009	3	10		27.1	33.4417	24.4275
	2009	3	11		27.7	32.9092	24.6692
	2009	3	12		28.1	33.6483	25.1154
	2009	3	13		27.9	33.2354	25.1733
	2009	3	14		27.7	32.4721	24.8217
	2009	3	15		25.3	32.8888	25.4896
	2009	3	16		26.3	33.4117	25.6887
	2009	3	17		27.6	30.3233	21.5083
	2009	3	18		25.2	28.2442	22.2133
	2009	3	19		25.6	28.2583	21.1408
	2009	3	20		27.1	27.1117	20.5904
	2009	3	21		27.4	28.1313	21.7633
	2009	3	22		24.6	28.8054	22.185
	2009	3	23		25.7	28.9875	22.2692
	2009	3	24		26.2	30.0296	22.6442
	2009	3	25		27.8	28.4642	21.0029
	2009	3	26		-	27.8413	21.7996
	2009	3	27		-	27.0767	20.7346
	2009	3	28		-	27.2892	20.5329
	2009	3	29		-	27.9929	19.7675
	2009	3	30		-	28.8304	20.4104
	2009	3	31		-	28.94	20.4287
	2010	3	1	26.1	-
	2010	3	2	29.2	27.8
	2010	3	3	29.7	-
	2010	3	4	26.9	27.8
	2010	3	5	26.4	26.4
	2010	3	6	27.3	-
	2010	3	7	27.3	28.8
	2010	3	8	29.2	23
	2010	3	9	25.4	26.6
	2010	3	10	28.3	26.2
	2010	3	11	28.9	28.2
	2010	3	12	29.3	24.8
	2010	3	13	-	27.4
	2010	3	14	28.9	-
	2010	3	15	27.3	26.4
	2010	3	16	-	26.1
	2010	3	17	-	-
	2010	3	18	-	-
	2010	3	19	27	-
	2010	3	20	26.9	-
	2010	3	21	27.4	-
	2010	3	22	26.9	-
	2010	3	23	29.2	-
	2010	3	24	29.2	-
	2010	3	25	30.4	-
	2010	3	26	30.1	-
	2010	3	27	29.7	-
	2010	3	28	30.6	-
	2010	3	29	30.1	-
	2010	3	30	30.4	-
	2010	3	31	29.6	-
	2001	4	1	-	28.8
	2001	4	2	-	-
	2001	4	3	-	-
	2001	4	4	-	-
	2001	4	5	-	25.8
	2001	4	6	-	-
	2001	4	7	22.9	22.8
	2001	4	8	-	24.8
	2001	4	9	-	23.8
	2001	4	10	25.9	26.3
	2001	4	11	26.6	26.1
	2001	4	12	28.3	25.8
	2001	4	13	27.6	27.7
	2001	4	14	27.3	26.3
	2001	4	15	-	-
	2001	4	16	26.2	27.1
	2001	4	17	27.5	27.3
	2001	4	18	28.3	27.2
	2001	4	19	26.3	27.3
	2001	4	20	26.2	24.9
	2001	4	21	-	27.8
	2001	4	22	-	-
	2001	4	23	27.5	27.4
	2001	4	24	-	26.8
	2001	4	25	27.8	28.5
	2001	4	26	-	-
	2001	4	27	26	26.9
	2001	4	28	28.8	-
	2001	4	29	27.8	28.3
	2001	4	30	27.2	27.9
	2002	4	1	27.6	27.2
	2002	4	2	-	27.6
	2002	4	3	27.7	26.4
	2002	4	4	28.2	27.9
	2002	4	5	28.6	27.7
	2002	4	6	-	28.7
	2002	4	7	27.8	-
	2002	4	8	28.8	28.2
	2002	4	9	28.8	28.4
	2002	4	10	29.1	29.6
	2002	4	11	-	-
	2002	4	12	28	26.7
	2002	4	13	-	27.7
	2002	4	14	25.8	26.4
	2002	4	15	26.9	27.6
	2002	4	16	24.4	25.1
	2002	4	17	25.4	23.3
	2002	4	18	25.8	26.2
	2002	4	19	-	-
	2002	4	20	-	-
	2002	4	21	-	26.5
	2002	4	22	26.2	-
	2002	4	23	26.7	26.6
	2002	4	24	26.8	26.1
	2002	4	25	26.6	28.1
	2002	4	26	26.2	26.7
	2002	4	27	27.2	27.2
	2002	4	28	26.2	26.8
	2002	4	29	26.3	26.4
	2002	4	30	27.2	26.6
	2003	4	1	29.2	28.2
	2003	4	2	28.9	28.3
	2003	4	3	30.6	28.2
	2003	4	4	30	29.2
	2003	4	5	-	-
	2003	4	6	-	-
	2003	4	7	-	30.1
	2003	4	8	-	28.2
	2003	4	9	28.9	29.6
	2003	4	10	27.3	28.1
	2003	4	11	27.1	27.7
	2003	4	12	-	27.3
	2003	4	13	-	25.4
	2003	4	14	27.3	25.9
	2003	4	15	27.8	26.5
	2003	4	16	-	26.7
	2003	4	17	-	25.1
	2003	4	18	25.6	24.8
	2003	4	19	-	26.8
	2003	4	20	26.4	25.2
	2003	4	21	-	23.9
	2003	4	22	24.6	25.7
	2003	4	23	28.4	26
	2003	4	24	27.4	25.7
	2003	4	25	28.1	26.7
	2003	4	26	26.7	26.7
	2003	4	27	-	25.2
	2003	4	28	26.1	25.9
	2003	4	29	27.3	25.7
	2003	4	30	26.9	25
	2004	4	1		28.9	31.2875	25.3013
	2004	4	2		27	31.0946	25.2679
	2004	4	3		-	31.45	24.3875
	2004	4	4		28.5	31.55	24.0308
	2004	4	5		29	31.55	24.9883
	2004	4	6		29.7	31.7442	25.1863
	2004	4	7		28.2	31.9008	24.9525
	2004	4	8		26	31.7233	25.0446
	2004	4	9		26.7	30.6142	22.5575
	2004	4	10		28	30.0383	21.685
	2004	4	11		26.8	29.2917	22.7067
	2004	4	12		25.9	27.9975	23.6375
	2004	4	13		24.1	26.9387	22.7192
	2004	4	14		23.2	25.7592	22.1063
	2004	4	15		27.6	25.1746	22.3233
	2004	4	16		27.2	26.2862	24.3163
	2004	4	17		29.2	27.7829	26.5246
	2004	4	18		27.9	28.6646	25.0192
	2004	4	19		27.5	28.7796	24.5008
	2004	4	20		29.2	28.6121	24.3804
	2004	4	21		27.1	29.6871	25.6367
	2004	4	22		28.4	30.23	25.3879
	2004	4	23		28.3	28.4408	24.5121
	2004	4	24		27.4	27.0613	24.2758
	2004	4	25		25.9	26.7142	21.3017
	2004	4	26		25.6	26.9246	22.0392
	2004	4	27		24.6	25.8	21.9208
	2004	4	28		23.4	23.7292	18.6783
	2004	4	29		23.3	24.5942	20.2029
	2004	4	30		24.9	25.5021	20.4367
	2005	4	1		28.2			26.6946	22.5546	94.6368
	2005	4	2		27.7			26.9683	23.2692	91.4539
	2005	4	3		28.3			27.8413	23.5262	87.7525
	2005	4	4		26.1			28.6967	23.6025	89.76
	2005	4	5		26.3			28.4163	22.2821	86.7477
	2005	4	6		24.3			28.8958	23.2121	92.4224
	2005	4	7		24			29.5367	24.1904	89.6
	2005	4	8		26.3			30.7058	25.0996	85.8539
	2005	4	9		25.4			29.25	23.1333	97.1627
	2005	4	10		26.6			27.62	23.5242	96.8341
	2005	4	11		25.9			26.9479	22.6988	92.7488
	2005	4	12		26.8			27.2554	22.7437	95.9701
	2005	4	13		26.1			27.8337	23.1779	95.3493
	2005	4	14		26.7			28.7396	24.2279	93.0176
	2005	4	15		26.1			27.7804	23.2733	99.4539
	2005	4	16		23.9			27.3867	22.9592	90.4192
	2005	4	17		26.1			25.4293	20.8967	87.9718
	2005	4	18		27.7
	2005	4	19		26.6
	2005	4	20		25.3
	2005	4	21		-
	2005	4	22		26.2
	2005	4	23		26.9
	2005	4	24		25.4
	2005	4	25		27.6
	2005	4	26		25.2
	2005	4	27		24.4
	2005	4	28		24.9
	2005	4	29		25.6
	2005	4	30		23.2
	2006	4	1	26	26.6
	2006	4	2	25.9	26.7						71.0938	2.3051
	2006	4	3	26.9	27						71.4706	2.34834
	2006	4	4	26.2	27						71.3	2.40832
	2006	4	5	25.8	25.7						71.2991	2.71688
	2006	4	6	26.7	24.4						69.7895	2.86788
	2006	4	7	27.4	27.3
	2006	4	8	27.8	27.1
	2006	4	9	26.1	26.2
	2006	4	10	25.1	26.2
	2006	4	11	25.5	26.2
	2006	4	12	25.2	26.9
	2006	4	13	26.8	26.7
	2006	4	14	28.3	26.8
	2006	4	15	26.7	27.4
	2006	4	16	26	25.6
	2006	4	17	24.5	25.1
	2006	4	18	25.3	26.4						84.3774	2.93891
	2006	4	19	24.9	24.4
	2006	4	20	25.6	26.1
	2006	4	21	26.7	26.3
	2006	4	22	26	27.5
	2006	4	23	27.1	27.1
	2006	4	24	25.3	25.3
	2006	4	25	24.1	25.6
	2006	4	26	24.2	24.1
	2006	4	27	24.3	22.6
	2006	4	28	23.7	23.3
	2006	4	29	23.2	24.2
	2006	4	30	24.1	24.4
	2007	4	1	26.8
	2007	4	2	26.1
	2007	4	3	26.2
	2007	4	4	-
	2007	4	5	26.1
	2007	4	6	28.1
	2007	4	7	-
	2007	4	8	-
	2007	4	9	25.2
	2007	4	10	24.9
	2007	4	11	26.2
	2007	4	12	27.2
	2007	4	13	27.3
	2007	4	14	26.8
	2007	4	15	25.7
	2007	4	16	27.1
	2007	4	17	27.2
	2007	4	18	26.6
	2007	4	19	26.9
	2007	4	20	27.2
	2007	4	21	25.7		32.7539	26.1472
	2007	4	22	26.4		31.8754	23.8242
	2007	4	23	26.1		32.2321	24.3058
	2007	4	24	24.8		32.4546	23.9696
	2007	4	25	25.9		32.8163	25.2758
	2007	4	26	27.2		34.1504	27.7804
	2007	4	27	28.1		35.0275	28.1796
	2007	4	28	26.7		33.3142	23.1371
	2007	4	29	22.8		31.1958	21.7083
	2007	4	30	23.9		30.0983	21.7258
	2008	4	1	25.6	25.4	26.1275	19.8525
	2008	4	2	24.7	23.9	25.3017	19.6692
	2008	4	3	24.2	23.9	23.7938	17.8812
	2008	4	4	24.4	25.9	22.7275	18.3508
	2008	4	5	24.8	24.7	25.5829	22.4213
	2008	4	6	26.3	25.9	27.2812	21.5575
	2008	4	7	27.2	25.3	25.6846	18.9429
	2008	4	8	25	23.8	24.9558	18.6713
	2008	4	9	25.7	25.1	25.2129	18.9437
	2008	4	10	25	24.9	25.9354	19.805
	2008	4	11	25.2	25.1	27.0025	22.3567
	2008	4	12	25.3	24.9	27.6971	22.1833
	2008	4	13	23.8	25.3	27.9513	22.21
	2008	4	14	24.2	24.6	28.2337	22.3987
	2008	4	15	24.2	23.8	27.13	20.7888
	2008	4	16	24.1	24.9	25.1587	19.0554
	2008	4	17	25.3	25.8	24.4171	18.3858
	2008	4	18	26.4	25.3	24.4513	19.1958
	2008	4	19	26.2	25.9	24.1117	17.7462
	2008	4	20	27.3	25.9	24.065	18.7579
	2008	4	21	24.5	27.4	24.07	18.2225
	2008	4	22	20.9	20.1	23.175	17.8942
	2008	4	23	22.6	23.5	23.0942	17.7779
	2008	4	24	23.3	22.4	22.7992	17.8358
	2008	4	25	23.6	23.5	22.1229	17.6479
	2008	4	26	24.4	24	22.6079	18.3958
	2008	4	27	22.9	23.9	22.58	18.1392
	2008	4	28	23.3	22.9	22.6888	18.2712
	2008	4	29	24.2	22.8	23.0167	18.2554
	2008	4	30	23.2	23.2	21.7825	16.5617
	2009	4	1			29.1913	20.8788
	2009	4	2			28.8633	19.7462
	2009	4	3			27.5654	19.575
	2009	4	4			26.5188	19.0321
	2009	4	5			25.5629	18.4279
	2009	4	6			26.6575	18.0263
	2009	4	7			27.4492	19.7067
	2009	4	8			28.62	21.7375
	2009	4	9			28.7954	21.5504
	2009	4	10			28.5617	21.705
	2009	4	11			28.3608	19.3146
	2009	4	12			28.45	19.2367
	2009	4	13			28.6083	19.9854
	2009	4	14			28.3158	19.7
	2009	4	15			26.2196	19.97
	2009	4	16			26.4913	19.8163
	2009	4	17			27.2037	19.6783
	2009	4	18			27.7667	19.7038
	2009	4	19			28.4325	20.4733
	2009	4	20			28.0138	20.0488
	2009	4	21			28.6721	21.9617
	2009	4	22			28.0742	21.7279
	2009	4	23			24.3667	18.7221
	2009	4	24			24.2758	17.8529
	2009	4	25			25.4908	18.1413
	2009	4	26			25.7783	16.9525
	2009	4	27			25.5871	17.2054
	2009	4	28			25.7996	17.4037
	2009	4	29			25.775	16.5546
	2009	4	30			25.0054	17.5879
	2010	4	1	29.2	-
	2010	4	2	30.2	-
	2010	4	3	28.8	-
	2010	4	4	30.4	-
	2010	4	5	30.2	-
	2010	4	6	29.5	-
	2010	4	7	30	-
	2010	4	8	28.1	-
	2010	4	9	28.8	-
	2010	4	10	29.7	-
	2010	4	11	25.9	-
	2010	4	12	25.8	-
	2010	4	13	25	-
	2010	4	14	-	-
	2010	4	15	-	-
	2010	4	16	27.8	-
	2010	4	17	25.9	25.7
	2010	4	18	27.9	27.8
	2010	4	19	-	-
	2010	4	20	-	-
	2010	4	21	26.8	-
	2010	4	22	-	-
	2010	4	23	-	-
	2010	4	24	-	-
	2010	4	25	-	-
	2010	4	26	-	-
	2010	4	27	-	-
	2010	4	28	-	-
	2010	4	29	26.8	24.8
	2010	4	30	26.4	24.7
	2001	5	1	26.3	24.5
	2001	5	2	24.5	23.6
	2001	5	3	-	-
	2001	5	4	-	-
	2001	5	5	27.4	26.8
	2001	5	6	24.6	26.8
	2001	5	7	24.2	25.1
	2001	5	8	24.9	22.9
	2001	5	9	25.3	25.9
	2001	5	10	24.9	25.1
	2001	5	11	-	21.2
	2001	5	12	26.1	23.6
	2001	5	13	-	-
	2001	5	14	-	22.2
	2001	5	15	23.5	23.3
	2001	5	16	-	24.6
	2001	5	17	23.9	23.4
	2001	5	18	-	-
	2001	5	19	24.2	-
	2001	5	20	25.5	25.7
	2001	5	21	26.3	24.7
	2001	5	22	25.1	23.7
	2001	5	23	25.4	24.3
	2001	5	24	25.6	24.4
	2001	5	25	24.9	23.9
	2001	5	26	-	24.4
	2001	5	27	23.7	22.5
	2001	5	28	24.3	23.2
	2001	5	29	-	-
	2001	5	30	25.2	23
	2001	5	31	23.1	23.8
	2002	5	1	27	25.9
	2002	5	2	26.8	24.8
	2002	5	3	27.3	27
	2002	5	4	27.2	26.9
	2002	5	5	26.3	26.3
	2002	5	6	26.8	26.9
	2002	5	7	25.8	27.5
	2002	5	8	24.9	25.9
	2002	5	9	24.3	25.3
	2002	5	10	24.6	23.1
	2002	5	11	24.3	25.2
	2002	5	12	26.5	27.1
	2002	5	13	23.5	25
	2002	5	14	24.9	25.7
	2002	5	15	25.2	22.7
	2002	5	16	25.3	24.1
	2002	5	17	23.8	24.6
	2002	5	18	24.3	25.6
	2002	5	19	24.4	25
	2002	5	20	25.3	25.4
	2002	5	21	25.1	23.5
	2002	5	22	25.4	24.3
	2002	5	23	26.9	26.8
	2002	5	24	26.9	25.8
	2002	5	25	27.5	26.2
	2002	5	26	-	-
	2002	5	27	-	-
	2002	5	28	-	-
	2002	5	29	-	-
	2002	5	30	-	-
	2002	5	31	-	-
	2003	5	1	26.9	27.2
	2003	5	2	26.8	25.3
	2003	5	3	26.2	24.6
	2003	5	4	-	24.2
	2003	5	5	26.9	25.2
	2003	5	6	27.3	27
	2003	5	7	26.2	25.8
	2003	5	8	25.6	24.1
	2003	5	9	-	20.2
	2003	5	10	-	-
	2003	5	11	-	27.3
	2003	5	12	27	26.7
	2003	5	13	25	22.8
	2003	5	14	23.7	24.6
	2003	5	15	24.6	23.9
	2003	5	16	-	-
	2003	5	17	-	-
	2003	5	18	-	-
	2003	5	19	-	24.2
	2003	5	20	25.6	23.4
	2003	5	21	24.7	23.8
	2003	5	22	24.1	22.7
	2003	5	23	-	24.1
	2003	5	24	22.8	23.4
	2003	5	25	-	26.8
	2003	5	26	-	25.2
	2003	5	27	26.6	25.7
	2003	5	28	23.9	25.2
	2003	5	29	-	24.3
	2003	5	30	24.4	24.9
	2003	5	31	21.8	23.9
	2004	5	1		23.6	25.8425	20.065
	2004	5	2		25.3	24.8983	19.5408
	2004	5	3		23.3	23.9317	20.2996	26.1287	15.4137	79.4752
	2004	5	4		22.8	23.7079	19.6854	24.4183	18.6579	82.6133
	2004	5	5		21.8	24.0188	20.9642	24.8171	18.8738	80.4971
	2004	5	6		23.8	23.7883	19.8067	25.0329	19.3337	81.2608
	2004	5	7		23.3	24.6225	21.4554	25.4567	19.6833	85.0837
	2004	5	8		24.4	24.4046	20.8092	25.7183	20.9279	85.8005
	2004	5	9		24.3	24.345	20.7533	25.7313	19.5154	80.2197
	2004	5	10		25.2	23.3492	19.1367	25.3121	18.8421	78.6901
	2004	5	11		23.1	22.8342	18.99	25.6142	19.9858	83.3493
	2004	5	12		23.6	23.4458	17.1829	25.9742	20.3133	86.5685
	2004	5	13		23.9	23.7196	16.6363	26.2208	20.4204	86.4128
	2004	5	14		25.3	23.7346	19.9612	26.3092	20.4858	80.7211
	2004	5	15		24.2	23.045	18.3221	25.7992	19.2167	81.4016
	2004	5	16		24.3	22.9208	18.0983	25.5004	19.58	80.0768
	2004	5	17		22.6	22.8875	15.6289	25.3642	18.8629	85.0901
	2004	5	18		23.9	22.6629	16.78	25.37	19.7117	87.4005
	2004	5	19		22.1	22.7908	16.5388	25.9613	20.535	84.9835
	2004	5	20		23.6	22.4088	16.0538	25.7913	20.1054	85.6469
	2004	5	21		23.2	22.2521	15.8425	24.7042	20.18	80.3755
	2004	5	22		22.4	22.3721	16.0133	24.0679	19.6442	86.944
	2004	5	23		21.6	22.3367	15.7542	23.3146	19.3562	93.3035
	2004	5	24		22.2	22.7575	16.6079	22.9975	20.6596	76.6229
	2004	5	25		24.7	23.3854	18.0762	22.8342	19.3704	83.008
	2004	5	26		23.1	23.3417	17.4088	21.7412	17.7387	93.2587
	2004	5	27		24.2	24.2479	19.7471	21.7442	18.2896	82.1653
	2004	5	28		23.9	23.8663	18.7608	22.0483	18.9275	84.3776
	2004	5	29		23.3	23.0296	18.9354	22.3767	18.5833	86.1675
	2004	5	30		21.9	23.345	19.4496	22.1971	19.075	83.2683
	2004	5	31		21.1	21.7958	15.9967	22.6392	18.5733	86.0245
	2005	5	1		25.4
	2005	5	2		22.8
	2005	5	3		21.7
	2005	5	4		25.8	24.4183	18.6579
	2005	5	5		23.8	24.8171	18.8738
	2005	5	6		23.5	25.0329	19.3337
	2005	5	7		25.6	25.4567	19.6833
	2005	5	8		24.8	25.7183	20.9279
	2005	5	9		24.7	25.7312	19.5154
	2005	5	10		23.7	25.3121	18.8421
	2005	5	11		26.4	25.6142	19.9858
	2005	5	12		23.8	25.9742	20.3133
	2005	5	13		24.6	26.2208	20.4204
	2005	5	14		25.8	26.3092	20.4858
	2005	5	15		25.8	25.7992	19.2167
	2005	5	16		24.6	25.5004	19.58
	2005	5	17		26.1	25.3642	18.8629
	2005	5	18		23.8	25.37	19.7117
	2005	5	19		24.7	25.9612	20.535
	2005	5	20		23.4	25.7913	20.1054
	2005	5	21		23.4	24.7042	20.18
	2005	5	22		23.5	24.0679	19.6442
	2005	5	23		23.5	23.3146	19.3562
	2005	5	24		26	22.9975	20.6596
	2005	5	25		22.9	22.8342	19.3704
	2005	5	26		21.3	21.7413	17.7387
	2005	5	27		24.3	21.7442	18.2896
	2005	5	28		21.4	22.0483	18.9275
	2005	5	29		25.3	22.3767	18.5833
	2005	5	30		-	22.1971	19.075
	2005	5	31		23.3	22.6392	18.5733
	2006	5	1	24.3	24.7
	2006	5	2	23.2	21.7
	2006	5	3	23.2	24
	2006	5	4	24.9	25.5
	2006	5	5	25.3	25.2
	2006	5	6	25.8	26.7
	2006	5	7	23.4	-
	2006	5	8	21.4	23.7
	2006	5	9	19.8	21.2
	2006	5	10	18.8	21.2
	2006	5	11	21.9	22.1
	2006	5	12	23.3	22.9
	2006	5	13	23.2	23.8
	2006	5	14	23.3	24.4						86.3137	3.35699
	2006	5	15	22.9	23.2						85.2287	3.46963
	2006	5	16	22.3	21.8						85.2953	3.62518
	2006	5	17	23.9	21.8						85.3774	3.75308
	2006	5	18	25.2	-
	2006	5	19	25.3	-
	2006	5	20	24.3	25.9
	2006	5	21	22.5	22.9						86.6058	3.46387
	2006	5	22	20.4	22.3						87.1972	3.63562
	2006	5	23	21.3	21						86.2069	3.07706
	2006	5	24	21.4	21.7						86.7355	3.63265
	2006	5	25	21.3	21.4						81.2465	7.6793
	2006	5	26	21.7	21.7
	2006	5	27	23.6	22.2
	2006	5	28	24.5	23.9
	2006	5	29	22.9	23.3
	2006	5	30	23.5	23.1
	2006	5	31	21	21.8
	2007	5	1	24.2	-	30.4312	23.4979
	2007	5	2	24.8	-	30.0696	23.0675
	2007	5	3	25.2	-	29.8004	23.4521
	2007	5	4	25	-	30.7633	24.31
	2007	5	5	-	-	30.2329	23.5225
	2007	5	6	-	-	29.6204	22.3767
	2007	5	7	24.8	25.8	28.7729	21.915
	2007	5	8	25.7	24.6	29.9262	22.9842
	2007	5	9	25.5	25	29.9796	23.0112
	2007	5	10	25.2	25.7	30.4412	23.3538
	2007	5	11	25.4	25.1	29.9713	21.9221
	2007	5	12	23.7	24.8	29.7308	21.8696
	2007	5	13	24.8	24.3	29.5183	21.7592
	2007	5	14	25.2	26.1	29.7258	22.7354
	2007	5	15	26.1	26.2	31.145	25.1742
	2007	5	16	25.5	25.3	31.7183	25.1737
	2007	5	17	25.7	25.6	30.9058	24.2817
	2007	5	18	23.2	25.5	30.1021	24.1217
	2007	5	19	25.4	24.7	29.5329	24.7404
	2007	5	20	25.1	25.3	30.4621	26.2667
	2007	5	21	26.7	27.7	27.6258	18.7296
	2007	5	22	20.1	21.5	24.5596	16.7029
	2007	5	23	19.9	18.8	24.3029	16.1721
	2007	5	24	20.1	19.2	24.2929	16.3396
	2007	5	25	21.7	21.1	23.9825	16.665
	2007	5	26	20.7	21.5	24.7042	18.0571
	2007	5	27	-	-	25.4387	17.7792
	2007	5	28	-	-	25.0296	17.2071
	2007	5	29	20.6	-	25.3842	18.7421
	2007	5	30	23.7	22.6	26.1354	19.4246
	2007	5	31	23.6	22.3	26.185	19.6612
	2008	5	1	24.7	25.3	21.6504	17.1446
	2008	5	2	23.2	23.8	22.0433	17.9408
	2008	5	3	22.4	23.2	22.6962	18.2083
	2008	5	4	23.9	24.3	22.3942	17.585
	2008	5	5	26.8	26.5	22.6537	17.6246
	2008	5	6	24.9	25.6	22.235	16.885
	2008	5	7	23.7	25.3	21.3429	16.1179
	2008	5	8	23.9	23.9	21.0029	16.06
	2008	5	9	23.8	24.2	20.4833	15.5829
	2008	5	10	25.3	24.6	20.1358	15.9371
	2008	5	11	26.2	25.3	20.1525	15.3454
	2008	5	12	24.7	25.4	20.2233	14.9308
	2008	5	13	27.3	25.4	19.8571	14.57
	2008	5	14	24.6	25	20.2492	14.6387
	2008	5	15	24.4	23.8	19.9337	13.7846
	2008	5	16	-	-	19.7304	15.2196
	2008	5	17	-	-	21.6513	17.7646
	2008	5	18	-	-	21.0963	16.6667
	2008	5	19	-	-	21.0163	17.025
	2008	5	20	24.9	23.8	22.4688	20.0596
	2008	5	21	20.9	20.9	21.625	16.9013
	2008	5	22	-	-	20.4258	16.3346
	2008	5	23	-	-	21.9267	18.6496
	2008	5	24	-	-	21.7188	16.3958
	2008	5	25	-	-	21.1125	16.4275
	2008	5	26	23.5	23.1	20.9654	16.8117
	2008	5	27	-	-	20.7629	16.1613
	2008	5	28	-	-	20.2587	15.0771
	2008	5	29	-	-	19.9479	14.7454
	2008	5	30	-	-	20.1946	15.3229
	2008	5	31	-	-	20.4933	15.7146
	2009	5	1	25.8		25.1575	17.7667
	2009	5	2	25.7		26.1275	19.8525
	2009	5	3	-		25.3017	19.6692
	2009	5	4	-		23.7938	17.8812
	2009	5	5	24.5		22.7275	18.3508
	2009	5	6	-		25.5829	22.4213
	2009	5	7	-		27.2812	21.5575
	2009	5	8	-		25.6846	18.9429
	2009	5	9	25.3		24.9558	18.6713
	2009	5	10	-		25.2129	18.9437
	2009	5	11	23.3		25.9354	19.805
	2009	5	12	-		27.0025	22.3567
	2009	5	13	23.8		27.6971	22.1833
	2009	5	14	-		27.9513	22.21
	2009	5	15	24.3		28.2337	22.3987
	2009	5	16	23.3		27.13	20.7888
	2009	5	17	25.9		25.1587	19.0554
	2009	5	18	24.6		24.4171	18.3858
	2009	5	19	-		24.4513	19.1958
	2009	5	20	24.3		24.1117	17.7462
	2009	5	21	22.6		24.065	18.7579
	2009	5	22	22.8		24.07	18.2225
	2009	5	23	23.2		23.175	17.8942
	2009	5	24	-		23.0942	17.7779
	2009	5	25	-		22.7992	17.8358
	2009	5	26	23.6		22.1229	17.6479
	2009	5	27	24.4		22.6079	18.3958
	2009	5	28	-		22.58	18.1392
	2009	5	29	24		22.6888	18.2712
	2009	5	30	25.4		23.0167	18.2554
	2009	5	31	25.2		21.7825	16.5617
	2010	5	1	25.4	-
	2010	5	2	25.7	23.8
	2010	5	3	25.2	23.6
	2010	5	4	25.2	23.9
	2010	5	5	29.3	28.2
	2010	5	6	27.7	27.5
	2010	5	7	27.4	27.2
	2010	5	8	25.2	25.4
	2010	5	9	25.5	25.7
	2010	5	10	27.2	25.5
	2010	5	11	28.8	24.9
	2010	5	12	26.7	26.8
	2010	5	13	25.8	24.9
	2010	5	14	25.7	26.4
	2010	5	15	24.3	24.1
	2010	5	16	23.9	24.2
	2010	5	17	24.3	22.5
	2010	5	18	25.2	23.9
	2010	5	19	25.7	24.4
	2010	5	20	25.8	24.9
	2010	5	21	26.4	23.3
	2010	5	22	24.7	23.1
	2010	5	23	22.8	22.4
	2010	5	24	25.3	24.4
	2010	5	25	22.8	23.5
	2010	5	26	24.4	23.5
	2010	5	27	24.8	23.8
	2010	5	28	25.9	23.6
	2010	5	29	23.9	24.7
	2010	5	30	23.3	23.3
	2010	5	31	22.7	22.5
	2001	6	1	-	23.3
	2001	6	2	-	-
	2001	6	3	-	-
	2001	6	4	22.6	24
	2001	6	5	24.1	24.5
	2001	6	6	-	-
	2001	6	7	-	23.6
	2001	6	8	23.1	23.3
	2001	6	9	-	-
	2001	6	10	23.2	-
	2001	6	11	23.8	21.4
	2001	6	12	22.1	20
	2001	6	13	24.3	20.8
	2001	6	14	22.3	22.2
	2001	6	15	21.6	21.5
	2001	6	16	-	-
	2001	6	17	-	21.8
	2001	6	18	-	23.2
	2001	6	19	24.3	21.9
	2001	6	20	-	21.7
	2001	6	21	-	19
	2001	6	22	22	-
	2001	6	23	-	-
	2001	6	24	24.6	20.7
	2001	6	25	-	-
	2001	6	26	-	-
	2001	6	27	-	21.2
	2001	6	28	21.5	21.4
	2001	6	29	23.2	22.7
	2001	6	30	-	23.2
	2002	6	1	-	24.4
	2002	6	2	-	-
	2002	6	3	23	23.8
	2002	6	4	20.6	22.7
	2002	6	5	20.8	21.8
	2002	6	6	21.6	20.4
	2002	6	7	23.2	21.4
	2002	6	8	23.6	22.4
	2002	6	9	25.5	24.9
	2002	6	10	24.3	23.5
	2002	6	11	23.1	22.1
	2002	6	12	24.7	22.6
	2002	6	13	25	23.6
	2002	6	14	25.5	24.8
	2002	6	15	23.9	23.8
	2002	6	16	22.7	25
	2002	6	17	22.9	21.3
	2002	6	18	-	-
	2002	6	19	-	-
	2002	6	20	-	-
	2002	6	21	-	-
	2002	6	22	20.4	21.1
	2002	6	23	22.6	21.2
	2002	6	24	-	21.1
	2002	6	25	22.1	22.4
	2002	6	26	21.7	22.5
	2002	6	27	23.6	23.4
	2002	6	28	23.4	23
	2002	6	29	23.9	22.3
	2002	6	30	25.1	23.2
	2003	6	1	-	25
	2003	6	2	23.7	23.5
	2003	6	3	24.4	23.2
	2003	6	4	25.8	24.8
	2003	6	5	23.4	23.4
	2003	6	6	25.8	23.8
	2003	6	7	25.2	24.4
	2003	6	8	25.3	25.5
	2003	6	9	-	24.4
	2003	6	10	-	20.9
	2003	6	11	-	20.8
	2003	6	12	-	23.3
	2003	6	13	-	21.2
	2003	6	14	-	21.4
	2003	6	15	-	23.2
	2003	6	16	-	23.1
	2003	6	17	-	23.7
	2003	6	18	-	24.2
	2003	6	19	-	21.8
	2003	6	20	-	21.1
	2003	6	21	-	21.6
	2003	6	22	-	21.8
	2003	6	23	-	22.4
	2003	6	24	-	20.8
	2003	6	25	-	19
	2003	6	26	-	21.2
	2003	6	27	-	19.6
	2003	6	28	-	18.9
	2003	6	29	-	20.6
	2003	6	30	-	21.1
	2004	6	1		20.7	21.2883	16.2508	22.4846	18.8992	83.5371
	2004	6	2		20.9	21.8513	16.7358	22.6142	18.765	85.7941
	2004	6	3		18.9	21.1429	15.8583	22.5992	18.4708	87.0229
	2004	6	4		20.6	21.7896	16.9742	23.1129	18.3675	87.2299
	2004	6	5		21.6	22.6421	17.8454	23.0471	19.0538	84.4267
	2004	6	6		20.2	22.4992	17.4488	23.3129	18.9083	83.4389
	2004	6	7		22.4	22.5221	15.6229	23.1329	19.7433	85.3035
	2004	6	8		24.3	20.8271	12.3829	23.9392	21.6792	78.7221
	2004	6	9		21.2			24.0592	20.1533	85.4485
	2004	6	10		20.9			23.4704	19.6875	91.6459
	2004	6	11		22.6			22.8317	19.2533	87.5925
	2004	6	12		-			21.3654	17.0117	83.7867
	2004	6	13		-			20.6	17.8404	77.1819
	2004	6	14		23.4			21.6954	19.7258	82.6581
	2004	6	15		20.6			22.2608	20.27	85.6619
	2004	6	16		21.2			22.2404	19.3075	89.2181
	2004	6	17		21.5			22.1767	18.2979	87.4475
	2004	6	18		20.8			20.9463	15.6329	82.1589
	2004	6	19		22.6			21.3529	17.635	84.9067
	2004	6	20		21.8			21.0263	16.7546	86.176
	2004	6	21		21.7			20.6842	16.1092	91.9893
	2004	6	22		22.8			20.9287	18.3475	90.8459
	2004	6	23		23.4			21.8783	19.7892	88.6635
	2004	6	24		21.6			21.7696	18.83	87.4048
	2004	6	25		22.3			20.7033	17.0621	87.5669
	2004	6	26		23.2			20.8	17.5396	90.0032
	2004	6	27		23.8			21.1987	18.3283	90.304
	2004	6	28		23.2			21.4962	18.465	94.0821
	2004	6	29		22.7			21.1238	17.905	86.7179
	2004	6	30		24.4			19.2804	15.0754	84.9131
	2005	6	1		22.7	22.4846	18.8992
	2005	6	2		23.5	22.6142	18.765
	2005	6	3		-	22.5992	18.4708
	2005	6	4		24.3	23.1129	18.3675
	2005	6	5		22.3	23.0471	19.0538
	2005	6	6		23.8	23.3129	18.9083
	2005	6	7		22.7	23.1329	19.7433
	2005	6	8		24.7	23.9392	21.6792
	2005	6	9		-	24.0592	20.1533
	2005	6	10		23.9	23.4704	19.6875
	2005	6	11		24.4	22.8317	19.2533
	2005	6	12		24.7	21.3654	17.0117
	2005	6	13		23.2	20.6	17.8404
	2005	6	14		24.4	21.6954	19.7258
	2005	6	15		22.3	22.2608	20.27
	2005	6	16		24.2	22.2404	19.3075
	2005	6	17		23	22.1767	18.2979
	2005	6	18		-	20.9462	15.6329
	2005	6	19		22.2	21.3529	17.635
	2005	6	20		22.2	21.0263	16.7546
	2005	6	21		-	20.6842	16.1092
	2005	6	22		25.6	20.9288	18.3475
	2005	6	23		23	21.8783	19.7892
	2005	6	24		22.5	21.7696	18.83
	2005	6	25		24.1	20.7033	17.0621
	2005	6	26		24.9	20.8	17.5396
	2005	6	27		-	21.1988	18.3283
	2005	6	28		-	21.4962	18.465
	2005	6	29		21.7	21.1238	17.905
	2005	6	30		-	19.2804	15.0754
	2006	6	1	23.1	21.7
	2006	6	2	23.2	24.1
	2006	6	3	22	22.9
	2006	6	4	20.3	20.7
	2006	6	5	20.1	20.8
	2006	6	6	22.7	20.9
	2006	6	7	23.9	20.6
	2006	6	8	23.6	22.9
	2006	6	9	23.7	22.8
	2006	6	10	25.8	25.1
	2006	6	11	-	23.4
	2006	6	12	26.2	25.6
	2006	6	13	24.8	23.7
	2006	6	14	24.9	23.6
	2006	6	15	23.8	23.9
	2006	6	16	21.8	21.9
	2006	6	17	21.5	22.2
	2006	6	18	20.1	21.2
	2006	6	19	20.1	21.1
	2006	6	20	22.3	21
	2006	6	21	23.2	21.2
	2006	6	22	23	21.9
	2006	6	23	21.9	21.7
	2006	6	24	21.9	21
	2006	6	25	21.1	19.7
	2006	6	26	19.2	22.1
	2006	6	27	17.8	18.1
	2006	6	28	18.6	19.7
	2006	6	29	18.7	20.1
	2006	6	30	19.5	18.6
	2007	6	1	24	24.2	25.635	20.9646
	2007	6	2	22.5	-	25.9358	22.7942
	2007	6	3	22.2	21.7	27.305	22.7742
	2007	6	4	23.2	23.6	26.7138	21.6067
	2007	6	5	23.6	22.4	26.3221	23.0933
	2007	6	6	25.2	25.4	27.2562	23.65
	2007	6	7	23.7	26.1	25.0171	19.0433
	2007	6	8	25.1	25.6	23.8975	18.1046
	2007	6	9	21.9	22.9	24.1075	18.9592
	2007	6	10	23	22.4	22.2886	14.2443
	2007	6	11	23.8	24.1
	2007	6	12	23.8	22.9
	2007	6	13	23.9	22.1
	2007	6	14	23.6	21.9
	2007	6	15	23.1	22.2
	2007	6	16	23	22.3
	2007	6	17	22.6	22.1
	2007	6	18	23.4	22.3
	2007	6	19	21.3	21.6
	2007	6	20	21.5	21.6
	2007	6	21	21.6	20.5
	2007	6	22	20.9	20.9
	2007	6	23	21.2	19.8
	2007	6	24	23.3	22.1
	2007	6	25	-	-
	2007	6	26	23.6	22.5
	2007	6	27	25.6	-
	2007	6	28	20.2	-
	2007	6	29	23.2	22.3
	2007	6	30	22.6	22.6
	2008	6	1	-	-	20.7763	15.9988
	2008	6	2	-	-	20.8613	16.3517
	2008	6	3	-	-	21.41	17.1229
	2008	6	4	23	-	21.8875	17.4046
	2008	6	5	21	21.7	22.7967	20.1675
	2008	6	6	22.6	-	24.3279	20.3804
	2008	6	7	22.4	-	21.6908	14.7596
	2008	6	8	22.2	-	22.1283	17.7167
	2008	6	9	21.8	-	23.8717	21.8396
	2008	6	10	21.6	-	23.9792	21.1175
	2008	6	11	20.4	-	23.5913	18.3229
	2008	6	12	21.6	-	21.8871	14.1979
	2008	6	13	21.4	-	20.6404	13.3183
	2008	6	14	21.9	-	20.7608	14.8225
	2008	6	15	22.8	-	19.6854	12.5625
	2008	6	16	24	-	19.675	13.0046
	2008	6	17	21.8	-	20.045	13.83
	2008	6	18	22.1	-	20.7729	15.8237
	2008	6	19	21.7	-	21.2608	16.4008
	2008	6	20	21.4	-	20.8646	16.2462
	2008	6	21	21.7	-	21.7346	16.6383
	2008	6	22	23.4	-	21.8046	16.4317
	2008	6	23	21	-	20.5408	15.2642
	2008	6	24	21.8	21.6	21.5408	17.9063
	2008	6	25	22.1	22.9	22.0813	17.9825
	2008	6	26	21.8	22.2	22.725	18.3762
	2008	6	27	22.1	21.5	22.6629	18.4462
	2008	6	28	21.3	21.9	22.7204	18.5821
	2008	6	29	21.6	20.3	22.1317	17.4346
	2008	6	30	22.3	21.3	23.9125	18.9612
	2009	6	1	24.6		21.6504	17.1446
	2009	6	2	24.3		22.0433	17.9408
	2009	6	3	24		22.6962	18.2083
	2009	6	4	23		22.3942	17.585
	2009	6	5	22.4		22.6537	17.6246
	2009	6	6	-		22.235	16.885
	2009	6	7	-		21.3429	16.1179
	2009	6	8	25.7		21.0029	16.06
	2009	6	9	23.8		20.4833	15.5829
	2009	6	10	23.2		20.1358	15.9371
	2009	6	11	22.8		20.1525	15.3454
	2009	6	12	23.1		20.2233	14.9308
	2009	6	13	22.2		19.8571	14.57
	2009	6	14	24.2		20.2492	14.6387
	2009	6	15	23.4		19.9337	13.7846
	2009	6	16	23.2		19.7304	15.2196
	2009	6	17	21.9		21.6513	17.7646
	2009	6	18	23.2		21.0963	16.6667
	2009	6	19	24.3		21.0163	17.025
	2009	6	20	-		22.4688	20.0596
	2009	6	21	23.6		21.625	16.9013
	2009	6	22	23.2		20.4258	16.3346
	2009	6	23	-		21.9267	18.6496
	2009	6	24	26.1		21.7188	16.3958
	2009	6	25	24.3		21.1125	16.4275
	2009	6	26	-		20.9654	16.8117
	2009	6	27	-		20.7629	16.1613
	2009	6	28	-		20.2587	15.0771
	2009	6	29	-		19.9479	14.7454
	2009	6	30	-		20.1946	15.3229
	2010	6	1	22.9	21.6
	2010	6	2	22.1	21.9
	2010	6	3	22.2	23
	2010	6	4	22.7	22.6						87.0577	3.27932
	2010	6	5	24	22.1
	2010	6	6	23.3	21.5
	2010	6	7	23.8	21.4						87.3969	3.4789
	2010	6	8	24.8	22.3						87.7899	3.46295
	2010	6	9	24.9	22.5						87.4059	3.78729
	2010	6	10	24.2	21.9						87.6862	3.60517
	2010	6	11	24.8	22.7						86.5872	3.75361
	2010	6	12	25.2	22.5
	2010	6	13	25.3	23.3
	2010	6	14	25.3	23.9
	2010	6	15	26.8	25.4
	2010	6	16	22.3	21.9
	2010	6	17	20.9	20.2
	2010	6	18	19.5	18.6
	2010	6	19	22.1	19.3
	2010	6	20	21.5	21.1
	2010	6	21	22	20.2
	2010	6	22	20.1	20.2
	2010	6	23	24.4	22
	2010	6	24	23.7	22.4
	2010	6	25	22.6	23
	2010	6	26	23.5	23.7
	2010	6	27	22.7	22.3
	2010	6	28	22.8	21.1
	2010	6	29	22.3	22.4
	2010	6	30	23.2	21.3
	2001	7	1	-	22.8
	2001	7	2	23.8	23.3
	2001	7	3	23.8	22.6
	2001	7	4	-	23.4
	2001	7	5	24.4	24.4
	2001	7	6	-	24.1
	2001	7	7	23.1	23.1
	2001	7	8	-	22.4
	2001	7	9	-	23.1
	2001	7	10	22.9	23.2
	2001	7	11	22.5	22.7
	2001	7	12	22.7	22.2
	2001	7	13	-	21.4
	2001	7	14	21.6	22.8
	2001	7	15	-	21.2
	2001	7	16	23.3	19.4
	2001	7	17	23.5	20.3
	2001	7	18	23.6	21.7
	2001	7	19	25.7	23.9
	2001	7	20	22.4	22.6
	2001	7	21	-	22.4
	2001	7	22	19.8	19.8
	2001	7	23	23.4	20.6
	2001	7	24	17.5	18.8
	2001	7	25	18.8	19.7
	2001	7	26	22.1	17.8
	2001	7	27	21	19.2
	2001	7	28	-	21.6
	2001	7	29	23.2	22.9
	2001	7	30	22.6	21.5
	2001	7	31	21.8	22.6
	2002	7	1	21.6	21.7
	2002	7	2	20	20.3
	2002	7	3	21.4	19.2
	2002	7	4	20.1	21.2
	2002	7	5	22.3	20.3
	2002	7	6	23.8	23.5
	2002	7	7	-	21.3
	2002	7	8	22.6	20.8
	2002	7	9	25.8	24.3
	2002	7	10	23.5	25
	2002	7	11	20.9	22.4
	2002	7	12	20.9	21.2
	2002	7	13	21.2	22.2
	2002	7	14	20.8	20.7
	2002	7	15	23	20.4
	2002	7	16	23.9	22
	2002	7	17	23.8	22.4
	2002	7	18	21.4	22.3
	2002	7	19	19.2	21
	2002	7	20	20.4	19.4
	2002	7	21	19.7	19.9
	2002	7	22	22.9	20.7
	2002	7	23	24.1	22.8
	2002	7	24	23.8	22.8
	2002	7	25	25.4	22.7
	2002	7	26	-	23.7
	2002	7	27	22.1	23.7
	2002	7	28	-	25.4
	2002	7	29	25.4	24
	2002	7	30	24.6	24.4
	2002	7	31	20.3	21.3
	2003	7	1		20.1
	2003	7	2		22.5
	2003	7	3		21.4
	2003	7	4		20.4
	2003	7	5		19.3
	2003	7	6		20.2
	2003	7	7		17.8
	2003	7	8		18.1
	2003	7	9		20.8
	2003	7	10		22
	2003	7	11		22.2
	2003	7	12		21.1
	2003	7	13		21.3
	2003	7	14		18.4
	2003	7	15		20.2
	2003	7	16		22.7
	2003	7	17		21.1
	2003	7	18		22.1
	2003	7	19		-
	2003	7	20		-
	2003	7	21		-
	2003	7	22		-
	2003	7	23		-
	2003	7	24		18.5
	2003	7	25		-
	2003	7	26		-
	2003	7	27		-
	2003	7	28		-
	2003	7	29		-
	2003	7	30		-
	2003	7	31		-
	2004	7	1		22.4			18.8496	16.3337	82.4341
	2004	7	2		-			19.4942	16.785	83.9467
	2004	7	3		23.5			18.7387	15.85	89.9072
	2004	7	4		22.9			19.0125	15.8412	93.8709
	2004	7	5		22.7			19.1258	16.2229	87.8208
	2004	7	6		21.1			19.0471	16.2733	91.5883
	2004	7	7		18.4			19.7608	17.9938	95.0933
	2004	7	8		18.7			19.9221	17.3042	95.7888
	2004	7	9		21.1			19.9092	18.1162	90.3872
	2004	7	10		20.2			20.76	18.5113	91.1339
	2004	7	11		22.7			20.905	18.6158	89.0496
	2004	7	12		21.2			20.8325	17.9325	89.696
	2004	7	13		22.6			20.6096	17.445	91.7867
	2004	7	14		19.6			21.6725	18.6829	90.7669
	2004	7	15		19.8			21.3738	17.9188	89.5957
	2004	7	16		19.4			21.3992	17.69	83.9765
	2004	7	17		21.4			20.9058	17.9196	89.1307
	2004	7	18		21.8			21.0992	17.7933	88.2304
	2004	7	19		21.7			21.4121	17.5983	90.0117
	2004	7	20		21.2			22.1071	19.0533	83.5136
	2004	7	21		20.6			22.8725	20.3771	83.5712
	2004	7	22		22			22.2333	17.1317	89.1563
	2004	7	23		23.9			22.2017	16.9158	88.7744
	2004	7	24		25.3			22.0442	16.3079	88.3563
	2004	7	25		22.2			21.92	16.0358	87.7696
	2004	7	26		25.3			21.8904	16.51	85.4357
	2004	7	27		25.1			22.4646	18.2408	85.9435
	2004	7	28		24.3			22.1621	17.3658	84.6016
	2004	7	29		24			22.1283	16.2054	85.9691
	2004	7	30		23.3			22.0583	15.8558	85.8581
	2004	7	31		25.2			21.8821	15.9321	84.2432
	2005	7	1		22.6	18.8496	16.3337
	2005	7	2		20.6	19.4942	16.785
	2005	7	3		-	18.7387	15.85
	2005	7	4		-	19.0125	15.8413
	2005	7	5		-	19.1258	16.2229
	2005	7	6		19.3	19.0471	16.2733
	2005	7	7		22.1	19.7608	17.9937
	2005	7	8		-	19.9221	17.3042
	2005	7	9		-	19.9092	18.1163
	2005	7	10		-	20.76	18.5113
	2005	7	11		-	20.905	18.6158
	2005	7	12		23.6	20.8325	17.9325
	2005	7	13		-	20.6096	17.445
	2005	7	14		-	21.6725	18.6829
	2005	7	15		-	21.3738	17.9187
	2005	7	16		-	21.3992	17.69
	2005	7	17		19.1	20.9058	17.9196
	2005	7	18		21.2	21.0992	17.7933
	2005	7	19		-	21.4121	17.5983
	2005	7	20		23.1	22.1071	19.0533
	2005	7	21		22.3	22.8725	20.3771
	2005	7	22		21.5	22.2333	17.1317
	2005	7	23		21.6	22.2017	16.9158
	2005	7	24		23.9	22.0442	16.3079
	2005	7	25		22.3	21.92	16.0358
	2005	7	26		-	21.8904	16.51
	2005	7	27		23.3	22.4646	18.2408
	2005	7	28		23.8	22.1621	17.3658
	2005	7	29		22.4	22.1283	16.2054
	2005	7	30		22.8	22.0583	15.8558
	2005	7	31		22.7	21.8821	15.9321
	2006	7	1	20.7	21
	2006	7	2	20.5	21.1
	2006	7	3	21.2	21.9
	2006	7	4	21.9	22.4
	2006	7	5	21.8	20.4
	2006	7	6	22.6	23.6
	2006	7	7	22.6	22.2
	2006	7	8	21.1	21.9
	2006	7	9	20.9	20.9
	2006	7	10	20.6	21.3
	2006	7	11	22.3	21.8
	2006	7	12	22.2	22.3
	2006	7	13	21.6	23.9
	2006	7	14	21.2	24.2
	2006	7	15	21.5	22.6
	2006	7	16	21.2	21.1
	2006	7	17	17.5	15.9
	2006	7	18	23.4	22.2
	2006	7	19	-	-
	2006	7	20	20.5	-
	2006	7	21	-	-
	2006	7	22	-	-
	2006	7	23	-	-
	2006	7	24	22.8	23.2
	2006	7	25	21.6	21.9
	2006	7	26	21.2	21.7
	2006	7	27	21.6	22.7
	2006	7	28	21	21.8
	2006	7	29	-	-
	2006	7	30	-	-
	2006	7	31	22.9	22.3
	2007	7	1	-	-
	2007	7	2	20.1	20.3
	2007	7	3	19.3	19.4
	2007	7	4	20.2	21.4
	2007	7	5	20.3	18.4
	2007	7	6	20.8	20
	2007	7	7	-	21.1
	2007	7	8	23.6	-
	2007	7	9	21.8	20.8
	2007	7	10	21.1	20.6
	2007	7	11	22.6	21.2
	2007	7	12	24.1	20.8
	2007	7	13	21.2	21.1
	2007	7	14	21	-
	2007	7	15	-	21.4
	2007	7	16	20.5	21.8
	2007	7	17	-	-
	2007	7	18	-	-
	2007	7	19	21.9	20.7
	2007	7	20	22.8	22.1
	2007	7	21	22.6	20.5
	2007	7	22	22.3	22.1
	2007	7	23	21.9	22.1
	2007	7	24	22.6	20.4
	2007	7	25	20.3	17.5
	2007	7	26	-	-
	2007	7	27	-	-
	2007	7	28	-	-
	2007	7	29	-	-
	2007	7	30	21.7	21.7
	2007	7	31	21.2	21.3
	2008	7	1	21.9	22.4	23.7287	18.5325
[truncated: 1,500 more rows]

## Sheet: Rainfall
Date	year	Month	PP Inhambane	PP Vilanculos	Vil count	Vil total	Prop rain days/month	In count	in total	Prop rain days/month In	Inhambane	vilanculos
2001-01-01	2001	1
2001-02-01	2001	2	49.53	286.51	12	6	0.5	9	4	0.444444	28.2	28.1917
2001-03-01	2001	3	4.82	33.27	9	5		9	4	0.444444	28.2333	28.4111
2001-04-01	2001	4	9.14	16.26	22	4	0.181818	17	2	0.117647	26.9529	26.6182
2001-05-01	2001	5	3.3	9.66	25	7	0.28	22	2	0.0909091	24.95	24.104
2001-06-01	2001	6	0.51	19.31	20	5	0.25	14	1	0.0714286	23.05	22.07
2001-07-01	2001	7	45.98	21.08	31	5	0.16129	22	8	0.363636	22.4318	21.8548
2001-08-01	2001	8	9.15	3.3	30	3	0.1	24	2	0.0833333	24.1125	23.63
2001-09-01	2001	9	3.06	3.81	29	2	0.0689655	25	3	0.12	24.472	24.4414
2001-10-01	2001	10	12.44	8.13	31	2	0.0645161	23	4	0.173913	26.1087	26.2548
2001-11-01	2001	11	69.85	104.4	30	7	0.233333	18	5	0.277778	28.0278	27.5067
2001-12-01	2001	12	261.87	176.79	29	12	0.413793	26	12	0.461538	27.7192	27.9862
2002-01-01	2002	1	18.55	11.43	31	4	0.129032	23	3	0.130435	29.6043	29.0419
2002-02-01	2002	2	16	9.14	25	3	0.12	20	4	0.2	29.16	28.932
2002-03-01	2002	3	19.3	65.78	29	8	0.275862	30	12	0.4	29.0633	28.2241
2002-04-01	2002	4	9.15	34.28	25	8	0.32	23	4	0.173913	27.0565	27.028
2002-05-01	2002	5	0.25	1.53	25	2	0.08	25	1	0.04	25.612	25.464
2002-06-01	2002	6	22.6	22.35	25	4	0.16	23	10	0.434783	23.1826	22.748
2002-07-01	2002	7	57.16	248.15	31	8	0.258065	28	11	0.392857	22.3179	22.0323
2002-08-01	2002	8	10.66	9.65	31	3	0.0967742	30	4	0.133333	24.4067	23.8839
2002-09-01	2002	9	16.77	12.69	30	4	0.133333	29	6	0.206897	24.8241	24.6
2002-10-01	2002	10	79.26	64.52	30	6	0.2	28	9	0.321429	25.6357	25.9667
2002-11-01	2002	11	27.44	73.4	22	6	0.272727	20	4	0.2	26.35	25.2227
2002-12-01	2002	12	2.04	5.08	25	5	0.2	11	3	0.272727	28.7818	27.876
2003-01-01	2003	1	90.68	158.77	30	10	0.333333	29	12	0.413793	29.6586	29.27
2003-02-01	2003	2	43.94	37.09	27	7	0.259259	23	10	0.434783	29.9348	29.7333
2003-03-01	2003	3	113.79	25.13	27	7	0.259259	25	5	0.2	28.908	28.0667
2003-04-01	2003	4	28.69	15.23	28	7	0.25	19	10	0.526316	27.6105	26.7071
2003-05-01	2003	5	18.03	8.38	27	2	0.0740741	19	4	0.210526	25.2684	24.6852
2003-06-01	2003	6	0	203.2	30	10	0.333333	7	0		24.8	22.3233
2003-07-01	2003	7	0	2.54	19	2	0.105263	0	0			20.5368
2003-08-01	2003	8	0	3.05	28	1	0.0357143	0	0			22.3286
2003-09-01	2003	9	0	23.12	30	3	0.1	0	0			24.1033
2003-10-01	2003	10	0	70.11	29	4	0.137931	0	0			25.2172
2003-11-01	2003	11	0	15.49	24	7	0.291667	0	0			27.2167
2003-12-01	2003	12	3.05	2.54	28	4	0.142857	1	1		23.8	28.7786
2004-01-01	2004	1		41.14	28	8	0.285714					29.4393
2004-02-01	2004	2		73.41	29	9	0.310345					28.6483
2004-03-01	2004	3		116.84	26	12	0.461538					28.3731
2004-04-01	2004	4		56.63	29	10	0.344828					26.8793
2004-05-01	2004	5		33.54	31	7	0.225806					23.4194
2004-06-01	2004	6		19.56	28	9	0.321429					21.975
2004-07-01	2004	7		5.33	30	4	0.133333					22.12
2004-08-01	2004	8		0	24	0	0					23.5667
2004-09-01	2004	9		2.54	28	2	0.0714286					24.425
2004-10-01	2004	10		63.75	31	5	0.16129					25.8581
2004-11-01	2004	11		9.65	25	3	0.12					27.656
2004-12-01	2004	12		46.99	17	1	0.0588235					29.2588
2005-01-01	2005	1		19.05	22	4	0.181818					29.4318
2005-02-01	2005	2		23.88	21	6	0.285714					29.0095
2005-03-01	2005	3		54.34	24	8	0.333333					28.1542
2005-04-01	2005	4		10.16	29	3	0.103448					25.9931
2005-05-01	2005	5			30	0	0					24.19
2005-06-01	2005	6		7.87	23	4	0.173913					23.4913
2005-07-01	2005	7		2.03	18	1	0.0555556					22.1222
2005-08-01	2005	8		0.76	30	1	0.0333333					24.5333
2005-09-01	2005	9		100.08	29	2	0.0689655					25.4103
2005-10-01	2005	10	2.03	3.05	29	2	0.0689655	6	1		23.6333	26.5034
2005-11-01	2005	11	0		5	0		1	0		29.1	28.4
2005-12-01	2005	12	177.81	335.53	27	13	0.481481	29	14	0.482759	26.5931	27.3704
2006-01-01	2006	1	193.55	28.7	17	6	0.352941	24	7	0.291667	28.8042	28.8941
2006-02-01	2006	2	167.13	52.07	24	4	0.166667	28	7	0.25	28.8036	29.7625
2006-03-01	2006	3	184.13	348.24	31	13	0.419355	31	16	0.516129	27.1839	27.7355
2006-04-01	2006	4	75.68	78.73	30	8	0.266667	30	11	0.366667	25.7133	25.8733
2006-05-01	2006	5	22.1	10.42	28	2	0.0714286	31	9	0.290323	22.8968	23.0393
2006-06-01	2006	6	76.21	96.01	30	5	0.166667	29	16	0.551724	22.0276	21.8067
2006-07-01	2006	7	9.14	0.76	24	1	0.0416667	25	2	0.08	21.456	21.8458
2006-08-01	2006	8	8.64	9.14	31	2	0.0645161	31	6	0.193548	22.1258	22.7129
2006-09-01	2006	9	2.55	0	30	0	0	30	3	0.1	22.49	23.4433
2006-10-01	2006	10	1.27	0	31	0	0	31	2	0.0645161	25.4161	26.3419
2006-11-01	2006	11	37.85	0	23	0	0	27	6	0.222222	26.9593	27.8174
2006-12-01	2006	12	58.41	0	11	0	0	24	7	0.291667	28.0083	29.9727
2007-01-01	2007	1	37.57	31.5	29	7	0.241379	31	13	0.419355	27.9355	28.9345
2007-02-01	2007	2	17.02	172.98	21	3	0.142857	27	4	0.148148	28.2778	28.7762
2007-03-01	2007	3	142.99		0	0		30	7	0.233333	27.46
2007-04-01	2007	4	82.03		0	0		27	10	0.37037	26.2667
2007-05-01	2007	5	22.1	6.09	22	2	0.0909091	27	5	0.185185	23.9852	24.0318
2007-06-01	2007	6	57.15	52.07	26	3	0.115385	29	5	0.172414	22.9862	22.6192
2007-07-01	2007	7	24.65	10.15	22	3	0.136364	22	7	0.318182	21.5409	20.7591
2007-08-01	2007	8	30.48	0.51	19	1	0.0526316	26	4	0.153846	22.2885	22.0474
2007-09-01	2007	9	2.79	0.51	28	1	0.0357143	26	2	0.0769231	24.3423	24.2107
2007-10-01	2007	10	4.07	0.25	27	1	0.037037	29	2	0.0689655	25.2621	25.8
2007-11-01	2007	11	28.7	88.9	24	5	0.208333	24	5	0.208333	26.7958	27.0333
2007-12-01	2007	12	251.99	64.28	27	11	0.407407	27	17	0.62963	26.7333	27.1407
2008-01-01	2008	1	126.76	129.54	31	8	0.258065	31	10	0.322581	27.9839	28.571
2008-02-01	2008	2	58.68	36.83	29	9	0.310345	29	13	0.448276	28.0552	28.1586
2008-03-01	2008	3	93.46	9.9	24	5	0.208333	31	15	0.483871	27.2194	26.7667
2008-04-01	2008	4	18.54	22.1	30	2	0.0666667	30	7	0.233333	24.5933	24.4667
2008-05-01	2008	5	16.51	3.05	18	2	0.111111	18	4	0.222222	24.3944	24.4111
2008-06-01	2008	6	28.21	1.02	8	1		27	7	0.259259	21.9556	21.675
2008-07-01	2008	7	24.13	10.41	30	4	0.133333	31	4	0.129032	21.9161	21.6867
2008-08-01	2008	8	8.38	3.56	23	3	0.130435	31	2	0.0645161	22.4	22.0217
2008-09-01	2008	9	10.17	7.11	28	1	0.0357143	30	4	0.133333	23.39	23.7321
2008-10-01	2008	10	11.43		4	0		29	2	0.0689655	24.931	24.325
2008-11-01	2008	11	34.04	14.22	14	3	0.214286	29	3	0.103448	26.3034	27.0571
2008-12-01	2008	12	584.95	225.3	28	13	0.464286	31	6	0.193548	27.8742	28.0786
2009-01-01	2009	1	83.06	2.03	23	1	0.0434783	27	13	0.481481	28.9259	29.7957
2009-02-01	2009	2	23.11	4.07	13	3	0.230769	2	1		28.65	28.9154
2009-03-01	2009	3	0	146.56	22	8	0.363636	0	0			26.9773
2009-04-01	2009	4	0		0	0		0	0
2009-05-01	2009	5	27.94		0	0		19	4	0.210526	24.3158
2009-06-01	2009	6	17.01		0	0		21	3	0.142857	23.6429
2009-07-01	2009	7	28.2	16.51	29	6	0.206897	28	8	0.285714	21.6393	21.0448
2009-08-01	2009	8	7.12	2.03	29	1	0.0344828	30	3	0.1	22.27	21.6724
2009-09-01	2009	9	5.08	10.67	25	3	0.12	25	1	0.04	24.44	24.18
2009-10-01	2009	10	6.1	0.25	27	1	0.037037	29	1	0.0344828	25.5931	26.0667
2009-11-01	2009	11	200.92	37.84	26	5	0.192308	27	8	0.296296	25.8889	25.8577
2009-12-01	2009	12	19.3	16.01	24	4	0.166667	29	4	0.137931	28.4448	28.4833
2010-01-01	2010	1	143.76	60.95	26	6	0.230769	28	9	0.321429	29.3393	28.9
2010-02-01	2010	2	121.66	172.2	28	7	0.25	28	10	0.357143	29.4036	28.8143
2010-03-01	2010	3	126.24	32	12	4	0.333333	27	11	0.407407	28.4333	26.625
2010-04-01	2010	4	82.81	7.87	4	1		19	6	0.315789	28.0632	25.75
2010-05-01	2010	5	49.03	24.13	30	5	0.166667	31	6	0.193548	25.3871	24.53
2010-06-01	2010	6	25.65	3.05	30	1	0.0333333	30	10	0.333333	23.1967	21.9433
2010-07-01	2010	7	24.38	3.3	10	3	0.3	15	8	0.533333	22.3	21.21
			4783.37	4885.12
		Grand						537
		Grand						2113

## Sheet: monthly means 
Year	Month	Day	Inhambane	vilanculos
	2 Average		28.2	28.1917
	3 Average		28.2333	28.4111
	4 Average		26.9529	26.6182
	5 Average		24.95	24.104
	6 Average		23.05	22.07
	7 Average		22.4318	21.8548
	8 Average		24.1125	23.63
	9 Average		24.472	24.4414
	10 Average		26.1087	26.2548
	11 Average		28.0278	27.5067
	12 Average		27.7192	27.9862
	1 Average		29.6043	29.0419
	2 Average		29.16	28.932
	3 Average		29.0633	28.2241
	4 Average		27.0565	27.028
	5 Average		25.612	25.464
	6 Average		23.1826	22.748
	7 Average		22.3179	22.0323
	8 Average		24.4067	23.8839
	9 Average		24.8241	24.6
	10 Average		25.6357	25.9667
	11 Average		26.35	25.2227
	12 Average		28.7818	27.876
	1 Average		29.6586	29.27
	2 Average		29.9348	29.7333
	3 Average		28.908	28.0667
	4 Average		27.6105	26.7071
	5 Average		25.2684	24.6852
	6 Average		24.8	22.3233
	7 Average			20.5368
	8 Average			22.3286
	9 Average			24.1033
	10 Average			25.2172
	11 Average			27.2167
	12 Average		23.8	28.7786
	1 Average			29.4393
	2 Average			28.6483
	3 Average			28.3731
	4 Average			26.8793
	5 Average			23.4194
	6 Average			21.975
	7 Average			22.12
	8 Average			23.5667
	9 Average			24.425
	10 Average			25.8581
	11 Average			27.656
	12 Average			29.2588
	1 Average			29.4318
	2 Average			29.0095
	3 Average			28.1542
	4 Average			25.9931
	5 Average			24.19
	6 Average			23.4913
	7 Average			22.1222
	8 Average			24.5333
	9 Average			25.4103
	10 Average		23.6333	26.5034
	11 Average		29.1	28.4
	12 Average		26.5931	27.3704
	1 Average		28.8042	28.8941
	2 Average		28.8036	29.7625
	3 Average		27.1839	27.7355
	4 Average		25.7133	25.8733
	5 Average		22.8968	23.0393
	6 Average		22.0276	21.8067
	7 Average		21.456	21.8458
	8 Average		22.1258	22.7129
	9 Average		22.49	23.4433
	10 Average		25.4161	26.3419
	11 Average		26.9593	27.8174
	12 Average		28.0083	29.9727
	1 Average		27.9355	28.9345
	2 Average		28.2778	28.7762
	3 Average		27.46
	4 Average		26.2667
	5 Average		23.9852	24.0318
	6 Average		22.9862	22.6192
	7 Average		21.5409	20.7591
	8 Average		22.2885	22.0474
	9 Average		24.3423	24.2107
	10 Average		25.2621	25.8
	11 Average		26.7958	27.0333
	12 Average		26.7333	27.1407
	1 Average		27.9839	28.571
	2 Average		28.0552	28.1586
	3 Average		27.2194	26.7667
	4 Average		24.5933	24.4667
	5 Average		24.3944	24.4111
	6 Average		21.9556	21.675
	7 Average		21.9161	21.6867
	8 Average		22.4	22.0217
	9 Average		23.39	23.7321
	10 Average		24.931	24.325
	11 Average		26.3034	27.0571
	12 Average		27.8742	28.0786
	1 Average		28.9259	29.7957
	2 Average		28.65	28.9154
	3 Average			26.9773
	4 Average
	5 Average		24.3158
	6 Average		23.6429
	7 Average		21.6393	21.0448
	8 Average		22.27	21.6724
	9 Average		24.44	24.18
	10 Average		25.5931	26.0667
	11 Average		25.8889	25.8577
	12 Average		28.4448	28.4833
	1 Average		29.3393	28.9
	2 Average		29.4036	28.8143
	3 Average		28.4333	26.625
	4 Average		28.0632	25.75
	5 Average		25.3871	24.53
	6 Average		23.1967	21.9433
	7 Average		22.3	21.21
	8 Average		22.1741

## Sheet: monthly data including Furvela
Number	Month	Year	Inhambane	vilanculos	Difference	Mean	soil furvela	furvela	humidity	air furvela
1	2	2001-02-01	28.2	28.1917	0.00833333	28.1958
2	3	2001-03-01	28.2333	28.4111	-0.177778	28.3222
3	4	2001-04-01	26.9529	26.6182	0.334759	26.7856
4	5	2001-05-01	24.95	24.104	0.846	24.527
5	6	2001-06-01	23.05	22.07	0.98	22.56
6	7	2001-07-01	22.4318	21.8548	0.576979	22.1433
7	8	2001-08-01	24.1125	23.63	0.4825	23.8712
8	9	2001-09-01	24.472	24.4414	0.0306207	24.4567
9	10	2001-10-01	26.1087	26.2548	-0.146143	26.1818
10	11	2001-11-01	28.0278	27.5067	0.521111	27.7672
11	12	2001-12-01	27.7192	27.9862	-0.266976	27.8527
12	1	2002-01-01	29.6043	29.0419	0.562412	29.3231
13	2	2002-02-01	29.16	28.932	0.228	29.046
14	3	2002-03-01	29.0633	28.2241	0.839195	28.6437
15	4	2002-04-01	27.0565	27.028	0.0285217	27.0423
16	5	2002-05-01	25.612	25.464	0.148	25.538
17	6	2002-06-01	23.1826	22.748	0.434609	22.9653
18	7	2002-07-01	22.3179	22.0323	0.285599	22.1751
19	8	2002-08-01	24.4067	23.8839	0.522796	24.1453
20	9	2002-09-01	24.8241	24.6	0.224138	24.7121
21	10	2002-10-01	25.6357	25.9667	-0.330952	25.8012
22	11	2002-11-01	26.35	25.2227	1.12727	25.7864
23	12	2002-12-01	28.7818	27.876	0.905818	28.3289
24	1	2003-01-01	29.6586	29.27	0.388621	29.4643
25	2	2003-02-01	29.9348	29.7333	0.201449	29.8341
26	3	2003-03-01	28.908	28.0667	0.841333	28.4873
27	4	2003-04-01	27.6105	26.7071	0.903383	27.1588
28	5	2003-05-01	25.2684	24.6852	0.583236	24.9768
29	6	2003-06-01	24.8	22.3233	2.47667	23.5617
30	7	2003-07-01		20.5368		20.5368
31	8	2003-08-01		22.3286		22.3286
32	9	2003-09-01		24.1033		24.1033
33	10	2003-10-01		25.2172		25.2172
34	11	2003-11-01		27.2167		27.2167
35	12	2003-12-01	23.8	28.7786	-4.97857	26.2893
36	1	2004-01-01		29.4393		29.4393
37	2	2004-02-01		28.6483		28.6483
38	3	2004-03-01		28.3731		28.3731	31.7569	25.934
39	4	2004-04-01		26.8793		26.8793	28.5641	23.5343
40	5	2004-05-01		23.4194		23.4194	24.5236	19.3401	83.8209
41	6	2004-06-01		21.975		21.975	21.9377	18.4303	86.395
42	7	2004-07-01		22.12		22.12	20.9934	17.3148	88.3035
43	8	2004-08-01		23.5667		23.5667	24.1991	19.4561	86.7441
44	9	2004-09-01		24.425		24.425	27.6479	21.0987	83.2172
45	10	2004-10-01		25.8581		25.8581	29.6172	23.0948	81.4746
46	11	2004-11-01		27.656		27.656	31.6662	24.8559	83.7631
47	12	2004-12-01		29.2588		29.2588	29.5431	24.4036	89.5721
48	1	2005-01-01		29.4318		29.4318	31.1767	26.0665	90.6606
49	2	2005-02-01		29.0095		29.0095	32.6236	26.5511	89.4949
50	3	2005-03-01		28.1542		28.1542	29.5475	25.0094	94.2188
51	4	2005-04-01		25.9931		25.9931	27.9999	23.1983	92.1856
52	5	2005-05-01		24.19		24.19	24.4663	19.4803
53	6	2005-06-01		23.4913		23.4913	21.9377	18.4303
54	7	2005-07-01		22.1222		22.1222	20.9934	17.3148
55	8	2005-08-01		24.5333		24.5333	24.1991	19.4561
56	9	2005-09-01		25.4103		25.4103	27.6479	21.0987
57	10	2005-10-01	23.6333	26.5034		25.0684	26.245	19.3706
58	11	2005-11-01	29.1	28.4	0.7	28.75
59	12	2005-12-01	26.5931	27.3704	-0.777267	26.9817
60	1	2006-01-01	28.8042	28.8941	-0.089951	28.8491
61	2	2006-02-01	28.8036	29.7625	-0.958929	29.283
62	3	2006-03-01	27.1839	27.7355	-0.551613	27.4597
63	4	2006-04-01	25.7133	25.8733	-0.16	25.7933
64	5	2006-05-01	22.8968	23.0393	-0.142512	22.968
65	6	2006-06-01	22.0276	21.8067	0.22092	21.9171
66	7	2006-07-01	21.456	21.8458	-0.389833	21.6509
67	8	2006-08-01	22.1258	22.7129	-0.587097	22.4194
68	9	2006-09-01	22.49	23.4433	-0.953333	22.9667
69	10	2006-10-01	25.4161	26.3419	-0.925806	25.879
70	11	2006-11-01	26.9593	27.8174	-0.858132	27.3883
71	12	2006-12-01	28.0083	29.9727	-1.96439	28.9905
72	1	2007-01-01	27.9355	28.9345	-0.998999	28.435
73	2	2007-02-01	28.2778	28.7762	-0.498413	28.527
74	3	2007-03-01	27.46			27.46
75	4	2007-04-01	26.2667			26.2667	32.5918	24.6054
76	5	2007-05-01	23.9852	24.0318	-0.046633	24.0085	28.4029	21.4521
77	6	2007-06-01	22.9862	22.6192	0.366976	22.8027	25.4479	20.5234
78	7	2007-07-01	21.5409	20.7591	0.781818	21.15
79	8	2007-08-01	22.2885	22.0474	0.241093	22.1679
80	9	2007-09-01	24.3423	24.2107	0.131593	24.2765
81	10	2007-10-01	25.2621	25.8	-0.537931	25.531	30.6847	23.5391
82	11	2007-11-01	26.7958	27.0333	-0.2375	26.9146	30.7009	24.7411
83	12	2007-12-01	26.7333	27.1407	-0.407407	26.937	31.6052	24.9082
84	1	2008-01-01	27.9839	28.571	-0.587097	28.2774	31.2825	24.3639
85	2	2008-02-01	28.0552	28.1586	-0.103448	28.1069	30.9401	23.2854
86	3	2008-03-01	27.2194	26.7667	0.452688	26.993	27.0849	19.361
87	4	2008-04-01	24.5933	24.4667	0.126667	24.53	24.692	19.2725
88	5	2008-05-01	24.3944	24.4111	-0.0166667	24.4028	21.0467	16.3753
89	6	2008-06-01	21.9556	21.675	0.280556	21.8153	21.8256	16.9137
90	7	2008-07-01	21.9161	21.6867	0.229462	21.8014	24.7469	18.3011
91	8	2008-08-01	22.4	22.0217	0.378261	22.2109	27.1287	19.9554
92	9	2008-09-01	23.39	23.7321	-0.342143	23.5611	30.461	22.4328
93	10	2008-10-01	24.931	24.325	0.606034	24.628	31.1491	23.6329
94	11	2008-11-01	26.3034	27.0571	-0.753695	26.6803	30.5664	23.4333
95	12	2008-12-01	27.8742	28.0786	-0.204378	27.9764	30.7481	24.7439
96	1	2009-01-01	28.9259	29.7957	-0.869726	29.3608	31.5533	24.8738
97	2	2009-02-01	28.65	28.9154	-0.265385	28.7827	31.1368	24.3291
98	3	2009-03-01		26.9773		26.9773	31.1173	23.4058
99	4	2009-04-01					27.1491	19.4141
100	5	2009-05-01	24.3158			24.3158	24.707	19.224
101	6	2009-06-01	23.6429			23.6429	21.0652	16.3973
102	7	2009-07-01	21.6393	21.0448	0.594458	21.3421	21.7826	16.8751
103	8	2009-08-01	22.27	21.6724	0.597586	21.9712	24.7469	18.3011
104	9	2009-09-01	24.44	24.18	0.26	24.31	27.0769	19.8832
105	10	2009-10-01	25.5931	26.0667	-0.473563	25.8299	30.4036	22.4228
106	11	2009-11-01	25.8889	25.8577	0.0311966	25.8733	31.1491	23.6329
107	12	2009-12-01	28.4448	28.4833	-0.0385057	28.4641
108	1	2010-01-01	29.3393	28.9	0.439286	29.1196
109	2	2010-02-01	29.4036	28.8143	0.589286	29.1089
110	3	2010-03-01	28.4333	26.625	1.80833	27.5292
111	4	2010-04-01	28.0632	25.75	2.31316	26.9066
112	5	2010-05-01	25.3871	24.53	0.857097	24.9585
113	6	2010-06-01	23.1967	21.9433	1.25333	22.57
114	7	2010-07-01	22.3	21.21	1.09	21.755
115	8	2010-08-01	22.1741			22.1741
	Grand
