# Supplementary material for: Some like it hot: a differential response to changing temperatures by the malaria vectors Anopheles funestus and An. gambiae s.l
Source: PeerJ. 2017 Mar 28;5:e3099. doi: 10.7717/peerj.3099 (PMC5372839; doi:10.7717/peerj.3099)
Supplement: File S8 — PCR data kindly provided by Dr Joao Pinto, GHTM Universidad Nova de Lisboa, Portugal. [file peerj-05-3099-s008.xls]

## Sheet: All data
Lab	N	Lot	Tube	Size	Year	Month	Date	House	Collection	sex	PCR	gambiae	arabiensis	merus	propn gam
DBL	234	79	1	83	2002	1	2002-01-15	1179	light	female	AR	0	1	0
DBL	235	79	13	87	2002	1	2002-01-15	1179	light	female	AR	0	1	0
DBL	236	79	11	88	2002	1	2002-01-15	1179	light	female	AR	0	1	0
DBL	237	79	7	98	2002	1	2002-01-15	1179	light	female	AR	0	1	0
DBL	247	67	3	95	2002	2	2002-02-14	866	light	female	AR	0	1	0
DBL	251	70	1	85	2002	9	2002-09-15	1127	light	female	AR	0	1	0
DBL	254	57	2	92	2002	12	2002-12-11	196	light	female	AR	0	1	0
DBL	265	58	17	79	2002	12	2002-12-16	66	light	female	AR	0	1	0
DBL	266	58	15	82	2002	12	2002-12-16	66	light	female	AR	0	1	0
DBL	267	58	6	85	2002	12	2002-12-16	66	light	female	AR	0	1	0
DBL	268	58	4	86	2002	12	2002-12-16	66	light	female	AR	0	1	0
DBL	269	58	12	87	2002	12	2002-12-16	66	light	female	AR	0	1	0
DBL	270	58	3	88	2002	12	2002-12-16	66	light	female	AR	0	1	0
DBL	271	58	8	91	2002	12	2002-12-16	66	light	female	AR	0	1	0
DBL	282	59	6	86	2002	12	2002-12-18	676	light	female	AR	0	1	0
DBL	283	59	7	88	2002	12	2002-12-18	676	light	female	AR	0	1	0
CMDT	1	43	1	93	2003	12	2003-12-18	655	light	female	AR	0	1	0
DBL	293	71	10	80	2003	1	2003-01-16	1127	light	female	AR	0	1	0
DBL	294	71	7	88	2003	1	2003-01-16	1127	light	female	AR	0	1	0
DBL	295	63a	8	90	2003	1	2003-01-16	179	light	female	AR	0	1	0
DBL	296	63a	9	90	2003	1	2003-01-16	179	light	female	AR	0	1	0
DBL	297	63a	13	90	2003	1	2003-01-16	179	light	female	AR	0	1	0
DBL	298	63a	18	93	2003	1	2003-01-16	179	light	female	AR	0	1	0
DBL	299	63a	5	97	2003	1	2003-01-16	179	light	female	AR	0	1	0
DBL	300	63a	6	99	2003	1	2003-01-16	179	light	female	AR	0	1	0
DBL	301	71	9	104	2003	1	2003-01-16	1127	light	female	AR	0	1	0
DBL	324	78	1	86	2003	3	2003-03-12	10	light	female	AR	0	1	0
DBL	325	66	2	90	2003	3	2003-03-12	1039	light	female	AR	0	1	0
DBL	326	66	3	95	2003	3	2003-03-12	1039	light	female	AR	0	1	0
DBL	327	78	2	96	2003	3	2003-03-12	10	light	female	AR	0	1	0
DBL	328	66	7	96	2003	3	2003-03-12	1039	light	female	AR	0	1	0
DBL	352	60	8	79	2003	3	2003-03-13	1005	light	female	AR	0	1	0
DBL	353	77	11	79	2003	3	2003-03-13	1010	light	female	AR	0	1	0
DBL	354	63	13	82	2003	3	2003-03-13	1039	light	female	AR	0	1	0
DBL	355	63	1	83	2003	3	2003-03-13	1039	light	female	AR	0	1	0
DBL	356	76	12	88	2003	3	2003-03-13	1044	light	female	AR	0	1	0
DBL	357	60	11	90	2003	3	2003-03-13	1005	light	female	AR	0	1	0
DBL	358	77	8	90	2003	3	2003-03-13	1010	light	female	AR	0	1	0
DBL	359	60	6	92	2003	3	2003-03-13	1005	light	female	AR	0	1	0
DBL	360	76	6	94	2003	3	2003-03-13	1044	light	female	AR	0	1	0
DBL	361	63	6		2003	3	2003-03-13	1039	light	female	AR	0	1	0
DBL	362	63	10		2003	3	2003-03-13	1039	light	female	AR	0	1	0
DBL	391	64	2	85	2003	3	2003-03-24	815	light	female	AR	0	1	0
DBL	403	62	5	89	2003	3	2003-03-27	706	light	female	AR	0	1	0
DBL	401	62a	7	81	2003	3	2003-03-27	736	rest	female	AR	0	1	0
DBL	402	62a	9	85	2003	3	2003-03-27	736	rest	female	AR	0	1	0
DBL	426	80	3	85	2003	4	2003-04-08	1133	rest	female	AR	0	1	0
DBL	427	80	4	85	2003	4	2003-04-08	1133	rest	female	AR	0	1	0
DBL	429	80	7	90	2003	4	2003-04-08	1133	rest	female	AR	0	1	0
CMDT	6	28	4	90	2004	2	2004-02-02	1134	light	female	AR	0	1	0
CMDT	7	28	1	91	2004	2	2004-02-02	1134	light	female	AR	0	1	0
CMDT	8	28	5	95	2004	2	2004-02-02	1134	light	female	AR	0	1	0
CMDT	14	7	4	89	2004	2	2004-02-03	2026	light	female	AR	0	1	0
CMDT	44	18	4	106	2004	2	2004-02-10	1181	light	female	AR	0	1	0
CMDT	53	15	2	90	2004	2	2004-02-11	3021	light	female	AR	0	1	0
CMDT	54	23	8	90	2004	2	2004-02-11	1042	light	female	AR	0	1	0
CMDT	55	27	8	100	2004	2	2004-02-11	35	light	female	AR	0	1	0
CMDT	96	16	4	90	2004	2	2004-02-26	917	light	female	AR	0	1	0
CMDT	97	16	3	93	2004	2	2004-02-26	917	light	female	AR	0	1	0
CMDT	153	5	1	95	2004	3	2004-03-22	1382	light	female	AR	0	1	0
CMDT	154	5	6	97	2004	3	2004-03-22	1382	light	female	AR	0	1	0
CMDT	224	12	10	97	2004	4	2004-04-28	259	light	female	AR	0	1	0
CMDT	225	12	6	100	2004	4	2004-04-28	259	light	female	AR	0	1	0
CMDT	226	12	3	101	2004	4	2004-04-28	259	light	female	AR	0	1	0
CMDT	126	10	10	89	2004	3	2004-03-17	300	saida	female	AR	0	1	0
CMDT	127	10	5	95	2004	3	2004-03-17	300	saida	female	AR	0	1	0
CMDT	128	10	8	95	2004	3	2004-03-17	300	saida	female	AR	0	1	0
DBL	238	79	5	80	2002	1	2002-01-15	1179	light	female	GA	1	0	0
DBL	239	79	15	82	2002	1	2002-01-15	1179	light	female	GA	1	0	0
DBL	240	79	6	85	2002	1	2002-01-15	1179	light	female	GA	1	0	0
DBL	241	79	3	86	2002	1	2002-01-15	1179	light	female	GA	1	0	0
DBL	242	79	8	86	2002	1	2002-01-15	1179	light	female	GA	1	0	0
DBL	243	79	2	87	2002	1	2002-01-15	1179	light	female	GA	1	0	0
DBL	244	79	12	88	2002	1	2002-01-15	1179	light	female	GA	1	0	0
DBL	245	79	10	90	2002	1	2002-01-15	1179	light	female	GA	1	0	0
DBL	246	79	4	92	2002	1	2002-01-15	1179	light	female	GA	1	0	0
DBL	248	67	2	79	2002	2	2002-02-14	866	light	female	GA	1	0	0
DBL	249	67	4	84	2002	2	2002-02-14	866	light	female	GA	1	0	0
DBL	250	67	1	96	2002	2	2002-02-14	866	light	female	GA	1	0	0
DBL	252	70	2	79	2002	9	2002-09-15	1127	light	female	GA	1	0	0
DBL	253	70	3	83	2002	9	2002-09-15	1127	light	female	GA	1	0	0
DBL	255	73	2	82	2002	12	2002-12-11	232	light	female	GA	1	0	0
DBL	256	57	4	84	2002	12	2002-12-11	196	light	female	GA	1	0	0
DBL	257	73	1	85	2002	12	2002-12-11	232	light	female	GA	1	0	0
DBL	258	57	6	86	2002	12	2002-12-11	196	light	female	GA	1	0	0
DBL	259	57	1	87	2002	12	2002-12-11	196	light	female	GA	1	0	0
DBL	260	57	3	87	2002	12	2002-12-11	196	light	female	GA	1	0	0
DBL	261	57	5	91	2002	12	2002-12-11	196	light	female	GA	1	0	0
DBL	262	72	1	80	2002	12	2002-12-13	237	light	female	GA	1	0	0
DBL	263	72	3	80	2002	12	2002-12-13	237	light	female	GA	1	0	0
DBL	264	72	4	81	2002	12	2002-12-13	237	light	female	GA	1	0	0
DBL	272	58	16	80	2002	12	2002-12-16	66	light	female	GA	1	0	0
DBL	273	58	10	84	2002	12	2002-12-16	66	light	female	GA	1	0	0
DBL	274	58	14	84	2002	12	2002-12-16	66	light	female	GA	1	0	0
DBL	275	58	7	86	2002	12	2002-12-16	66	light	female	GA	1	0	0
DBL	276	58	1	87	2002	12	2002-12-16	66	light	female	GA	1	0	0
DBL	277	58	5	87	2002	12	2002-12-16	66	light	female	GA	1	0	0
DBL	278	58	9	88	2002	12	2002-12-16	66	light	female	GA	1	0	0
DBL	279	58	11	90	2002	12	2002-12-16	66	light	female	GA	1	0	0
DBL	280	58	13	93	2002	12	2002-12-16	66	light	female	GA	1	0	0
DBL	281	58	2	95	2002	12	2002-12-16	66	light	female	GA	1	0	0
DBL	284	61	1	76	2002	12	2002-12-18	664	light	female	GA	1	0	0
DBL	285	59	4	79	2002	12	2002-12-18	676	light	female	GA	1	0	0
DBL	286	59	8	82	2002	12	2002-12-18	676	light	female	GA	1	0	0
DBL	287	61	2	83	2002	12	2002-12-18	664	light	female	GA	1	0	0
DBL	288	59	5	84	2002	12	2002-12-18	676	light	female	GA	1	0	0
DBL	289	59	9	89	2002	12	2002-12-18	676	light	female	GA	1	0	0
DBL	290	59	10	89	2002	12	2002-12-18	676	light	female	GA	1	0	0
DBL	291	59	2	96	2002	12	2002-12-18	676	light	female	GA	1	0	0
DBL	292	59	3	100	2002	12	2002-12-18	676	light	female	GA	1	0	0
CMDT	2	43	4	88	2003	12	2003-12-18	655	light	female	GA	1	0	0
CMDT	3	43	8	89	2003	12	2003-12-18	655	light	female	GA	1	0	0
CMDT	4	43	2	91	2003	12	2003-12-18	655	light	female	GA	1	0	0
CMDT	5	43	3	91	2003	12	2003-12-18	655	light	female	GA	1	0	0
DBL	302	63a	2	82	2003	1	2003-01-16	179	light	female	GA	1	0	0
DBL	303	63a	16	82	2003	1	2003-01-16	179	light	female	GA	1	0	0
DBL	304	63a	10	83	2003	1	2003-01-16	179	light	female	GA	1	0	0
DBL	305	63a	4	85	2003	1	2003-01-16	179	light	female	GA	1	0	0
DBL	306	63a	12	86	2003	1	2003-01-16	179	light	female	GA	1	0	0
DBL	307	71	2	86	2003	1	2003-01-16	1127	light	female	GA	1	0	0
DBL	308	71	8	86	2003	1	2003-01-16	1127	light	female	GA	1	0	0
DBL	309	63a	7	87	2003	1	2003-01-16	179	light	female	GA	1	0	0
DBL	310	63a	11	87	2003	1	2003-01-16	179	light	female	GA	1	0	0
DBL	311	71	1	88	2003	1	2003-01-16	1127	light	female	GA	1	0	0
DBL	312	71	3	88	2003	1	2003-01-16	1127	light	female	GA	1	0	0
DBL	313	71	5	92	2003	1	2003-01-16	1127	light	female	GA	1	0	0
DBL	314	63a	14	93	2003	1	2003-01-16	179	light	female	GA	1	0	0
DBL	315	68	2	80	2003	3	2003-03-06	35	light	female	GA	1	0	0
DBL	316	68	6	84	2003	3	2003-03-06	35	light	female	GA	1	0	0
DBL	317	68	9	84	2003	3	2003-03-06	35	light	female	GA	1	0	0
DBL	318	68	4	85	2003	3	2003-03-06	35	light	female	GA	1	0	0
DBL	319	68	5	87	2003	3	2003-03-06	35	light	female	GA	1	0	0
DBL	320	68	3	89	2003	3	2003-03-06	35	light	female	GA	1	0	0
DBL	321	68	8	90	2003	3	2003-03-06	35	light	female	GA	1	0	0
DBL	322	68	10	91	2003	3	2003-03-06	35	light	female	GA	1	0	0
DBL	323	68	1	94	2003	3	2003-03-06	35	light	female	GA	1	0	0
DBL	329	78	7	77	2003	3	2003-03-12	10	light	female	GA	1	0	0
DBL	330	66	13	77	2003	3	2003-03-12	1039	light	female	GA	1	0	0
DBL	331	78	9	81	2003	3	2003-03-12	10	light	female	GA	1	0	0
DBL	332	78	8	83	2003	3	2003-03-12	10	light	female	GA	1	0	0
DBL	333	78	6	84	2003	3	2003-03-12	10	light	female	GA	1	0	0
DBL	334	66	4	85	2003	3	2003-03-12	1039	light	female	GA	1	0	0
DBL	335	78	10	86	2003	3	2003-03-12	10	light	female	GA	1	0	0
DBL	336	66	10	86	2003	3	2003-03-12	1039	light	female	GA	1	0	0
DBL	337	75	9	86	2003	3	2003-03-12	1044	light	female	GA	1	0	0
DBL	338	78	11	87	2003	3	2003-03-12	10	light	female	GA	1	0	0
DBL	339	66	6	87	2003	3	2003-03-12	1039	light	female	GA	1	0	0
DBL	340	66	11	87	2003	3	2003-03-12	1039	light	female	GA	1	0	0
DBL	341	75	12	88	2003	3	2003-03-12	1044	light	female	GA	1	0	0
DBL	342	75	11	89	2003	3	2003-03-12	1044	light	female	GA	1	0	0
DBL	343	78	4	90	2003	3	2003-03-12	10	light	female	GA	1	0	0
DBL	344	78	5	90	2003	3	2003-03-12	10	light	female	GA	1	0	0
DBL	345	66	1	90	2003	3	2003-03-12	1039	light	female	GA	1	0	0
DBL	346	66	9	90	2003	3	2003-03-12	1039	light	female	GA	1	0	0
DBL	347	78	3	91	2003	3	2003-03-12	10	light	female	GA	1	0	0
DBL	348	75	7	92	2003	3	2003-03-12	1044	light	female	GA	1	0	0
DBL	349	78	12	93	2003	3	2003-03-12	10	light	female	GA	1	0	0
DBL	350	66	8	93	2003	3	2003-03-12	1039	light	female	GA	1	0	0
DBL	351	66	5	98	2003	3	2003-03-12	1039	light	female	GA	1	0	0
DBL	363	77	12	78	2003	3	2003-03-13	1010	light	female	GA	1	0	0
DBL	364	60	9	79	2003	3	2003-03-13	1005	light	female	GA	1	0	0
DBL	365	63	14	82	2003	3	2003-03-13	1039	light	female	GA	1	0	0
DBL	366	63	3	86	2003	3	2003-03-13	1039	light	female	GA	1	0	0
DBL	367	63	8	86	2003	3	2003-03-13	1039	light	female	GA	1	0	0
DBL	368	77	9	87	2003	3	2003-03-13	1010	light	female	GA	1	0	0
DBL	369	76	10	87	2003	3	2003-03-13	1044	light	female	GA	1	0	0
DBL	370	60	10	90	2003	3	2003-03-13	1005	light	female	GA	1	0	0
DBL	371	77	3	92	2003	3	2003-03-13	1010	light	female	GA	1	0	0
DBL	372	60	5	93	2003	3	2003-03-13	1005	light	female	GA	1	0	0
DBL	373	77	2	94	2003	3	2003-03-13	1010	light	female	GA	1	0	0
DBL	374	63	12	94	2003	3	2003-03-13	1039	light	female	GA	1	0	0
DBL	383	74	1	76	2003	3	2003-03-23	237	light	female	GA	1	0	0
DBL	384	74	5	79	2003	3	2003-03-23	237	light	female	GA	1	0	0
DBL	385	74	4	80	2003	3	2003-03-23	237	light	female	GA	1	0	0
DBL	386	74	3	81	2003	3	2003-03-23	237	light	female	GA	1	0	0
DBL	387	74	8	81	2003	3	2003-03-23	237	light	female	GA	1	0	0
DBL	388	74	2	83	2003	3	2003-03-23	237	light	female	GA	1	0	0
DBL	389	74	7	84	2003	3	2003-03-23	237	light	female	GA	1	0	0
DBL	390	74	6	86	2003	3	2003-03-23	237	light	female	GA	1	0	0
DBL	392	64	1	84	2003	3	2003-03-24	815	light	female	GA	1	0	0
DBL	393	69	5	72	2003	3	2003-03-26	35	light	female	GA	1	0	0
DBL	394	69	3	74	2003	3	2003-03-26	35	light	female	GA	1	0	0
DBL	395	69	6	76	2003	3	2003-03-26	35	light	female	GA	1	0	0
DBL	396	69	9	78	2003	3	2003-03-26	35	light	female	GA	1	0	0
DBL	397	69	10	81	2003	3	2003-03-26	35	light	female	GA	1	0	0
DBL	398	69	1	83	2003	3	2003-03-26	35	light	female	GA	1	0	0
DBL	399	69	2	83	2003	3	2003-03-26	35	light	female	GA	1	0	0
DBL	400	69	4	89	2003	3	2003-03-26	35	light	female	GA	1	0	0
DBL	404	62	1	75	2003	3	2003-03-27	706	light	female	GA	1	0	0
DBL	405	62	10	76	2003	3	2003-03-27	706	light	female	GA	1	0	0
DBL	406	62	13	80	2003	3	2003-03-27	706	light	female	GA	1	0	0
DBL	407	62	14	81	2003	3	2003-03-27	706	light	female	GA	1	0	0
DBL	408	62	6	82	2003	3	2003-03-27	706	light	female	GA	1	0	0
DBL	409	62	8	83	2003	3	2003-03-27	706	light	female	GA	1	0	0
DBL	410	62	15	84	2003	3	2003-03-27	706	light	female	GA	1	0	0
DBL	411	62	7	85	2003	3	2003-03-27	706	light	female	GA	1	0	0
DBL	412	62	4	86	2003	3	2003-03-27	706	light	female	GA	1	0	0
DBL	413	62	12	86	2003	3	2003-03-27	706	light	female	GA	1	0	0
DBL	414	62	9	87	2003	3	2003-03-27	706	light	female	GA	1	0	0
DBL	416	62	2	88	2003	3	2003-03-27	706	light	female	GA	1	0	0
DBL	419	62	3	91	2003	3	2003-03-27	706	light	female	GA	1	0	0
DBL	421	65	1	78	2003	3	2003-03-31	695	light	female	GA	1	0	0
DBL	422	65	2	82	2003	3	2003-03-31	695	light	female	GA	1	0	0
DBL	423	65	3	82	2003	3	2003-03-31	695	light	female	GA	1	0	0
DBL	424	65	4	85	2003	3	2003-03-31	695	light	female	GA	1	0	0
DBL	415	62a	5	87	2003	3	2003-03-27	736	rest	female	GA	1	0	0
DBL	417	62a	1	89	2003	3	2003-03-27	736	rest	female	GA	1	0	0
DBL	418	62a	2	89	2003	3	2003-03-27	736	rest	female	GA	1	0	0
DBL	420	62a	4	91	2003	3	2003-03-27	736	rest	female	GA	1	0	0
DBL	430	80	2	71	2003	4	2003-04-08	1133	rest	female	GA	1	0	0
DBL	431	80	1	74	2003	4	2003-04-08	1133	rest	female	GA	1	0	0
DBL	432	80	6	77	2003	4	2003-04-08	1133	rest	female	GA	1	0	0
DBL	435	80	5	82	2003	4	2003-04-08	1133	rest	female	GA	1	0	0
CMDT	9	28	3	85	2004	2	2004-02-02	1134	light	female	GA	1	0	0
CMDT	10	28	8	86	2004	2	2004-02-02	1134	light	female	GA	1	0	0
CMDT	11	28	6	90	2004	2	2004-02-02	1134	light	female	GA	1	0	0
CMDT	12	28	7	94	2004	2	2004-02-02	1134	light	female	GA	1	0	0
CMDT	13	28	9	94	2004	2	2004-02-02	1134	light	female	GA	1	0	0
CMDT	15	7	6	80	2004	2	2004-02-03	2026	light	female	GA	1	0	0
CMDT	16	7	3	83	2004	2	2004-02-03	2026	light	female	GA	1	0	0
CMDT	17	2	8	84	2004	2	2004-02-03	917	light	female	GA	1	0	0
CMDT	18	7	2	85	2004	2	2004-02-03	2026	light	female	GA	1	0	0
CMDT	19	2	3	87	2004	2	2004-02-03	917	light	female	GA	1	0	0
CMDT	20	2	7	88	2004	2	2004-02-03	917	light	female	GA	1	0	0
CMDT	21	2	6	89	2004	2	2004-02-03	917	light	female	GA	1	0	0
CMDT	22	2	10	89	2004	2	2004-02-03	917	light	female	GA	1	0	0
CMDT	23	2	2	90	2004	2	2004-02-03	917	light	female	GA	1	0	0
CMDT	24	2	9	90	2004	2	2004-02-03	917	light	female	GA	1	0	0
CMDT	25	7	7	90	2004	2	2004-02-03	2026	light	female	GA	1	0	0
CMDT	26	7	8	92	2004	2	2004-02-03	2026	light	female	GA	1	0	0
CMDT	27	2	5	93	2004	2	2004-02-03	917	light	female	GA	1	0	0
CMDT	28	2	1	94	2004	2	2004-02-03	917	light	female	GA	1	0	0
CMDT	29	7	5	95	2004	2	2004-02-03	2026	light	female	GA	1	0	0
CMDT	30	7	10	98	2004	2	2004-02-03	2026	light	female	GA	1	0	0
CMDT	31	7	1	100	2004	2	2004-02-03	2026	light	female	GA	1	0	0
CMDT	32	7	9	100	2004	2	2004-02-03	2026	light	female	GA	1	0	0
CMDT	37	1	2	81	2004	2	2004-02-09	1181	light	female	GA	1	0	0
CMDT	38	1	5	88	2004	2	2004-02-09	1181	light	female	GA	1	0	0
CMDT	39	1	9	93	2004	2	2004-02-09	1181	light	female	GA	1	0	0
CMDT	40	1	3	95	2004	2	2004-02-09	1181	light	female	GA	1	0	0
CMDT	41	1	10	95	2004	2	2004-02-09	1181	light	female	GA	1	0	0
CMDT	42	1	1	97	2004	2	2004-02-09	1181	light	female	GA	1	0	0
CMDT	43	1	4	99	2004	2	2004-02-09	1181	light	female	GA	1	0	0
CMDT	45	18	7	86	2004	2	2004-02-10	1181	light	female	GA	1	0	0
CMDT	46	18	3	87	2004	2	2004-02-10	1181	light	female	GA	1	0	0
CMDT	47	18	5	87	2004	2	2004-02-10	1181	light	female	GA	1	0	0
CMDT	48	18	9	87	2004	2	2004-02-10	1181	light	female	GA	1	0	0
CMDT	49	18	2	89	2004	2	2004-02-10	1181	light	female	GA	1	0	0
CMDT	50	18	8	89	2004	2	2004-02-10	1181	light	female	GA	1	0	0
CMDT	51	18	6	90	2004	2	2004-02-10	1181	light	female	GA	1	0	0
CMDT	52	18	1	99	2004	2	2004-02-10	1181	light	female	GA	1	0	0
CMDT	57	15	3	83	2004	2	2004-02-11	3021	light	female	GA	1	0	0
CMDT	58	46	7	83	2004	2	2004-02-11	583	light	female	GA	1	0	0
CMDT	59	23	7	84	2004	2	2004-02-11	1042	light	female	GA	1	0	0
CMDT	60	24	5	84	2004	2	2004-02-11	431	light	female	GA	1	0	0
CMDT	61	27	5	84	2004	2	2004-02-11	35	light	female	GA	1	0	0
CMDT	63	15	9	86	2004	2	2004-02-11	3021	light	female	GA	1	0	0
CMDT	64	15	7	87	2004	2	2004-02-11	3021	light	female	GA	1	0	0
CMDT	65	24	7	87	2004	2	2004-02-11	431	light	female	GA	1	0	0
CMDT	67	24	8	88	2004	2	2004-02-11	431	light	female	GA	1	0	0
CMDT	68	15	8	89	2004	2	2004-02-11	3021	light	female	GA	1	0	0
CMDT	69	15	10	89	2004	2	2004-02-11	3021	light	female	GA	1	0	0
CMDT	70	15	1	91	2004	2	2004-02-11	3021	light	female	GA	1	0	0
CMDT	71	23	4	91	2004	2	2004-02-11	1042	light	female	GA	1	0	0
CMDT	72	15	5	92	2004	2	2004-02-11	3021	light	female	GA	1	0	0
CMDT	73	15	6	92	2004	2	2004-02-11	3021	light	female	GA	1	0	0
CMDT	74	24	1	92	2004	2	2004-02-11	431	light	female	GA	1	0	0
CMDT	75	46	8	93	2004	2	2004-02-11	583	light	female	GA	1	0	0
CMDT	76	27	1	94	2004	2	2004-02-11	35	light	female	GA	1	0	0
CMDT	77	15	4	99	2004	2	2004-02-11	3021	light	female	GA	1	0	0
CMDT	78	4	4	80	2004	2	2004-02-16	133	light	female	GA	1	0	0
CMDT	79	4	8	84	2004	2	2004-02-16	133	light	female	GA	1	0	0
CMDT	80	4	5	85	2004	2	2004-02-16	133	light	female	GA	1	0	0
CMDT	81	4	2	88	2004	2	2004-02-16	133	light	female	GA	1	0	0
CMDT	82	4	7	88	2004	2	2004-02-16	133	light	female	GA	1	0	0
CMDT	83	4	9	88	2004	2	2004-02-16	133	light	female	GA	1	0	0
CMDT	84	4	3	90	2004	2	2004-02-16	133	light	female	GA	1	0	0
CMDT	85	4	10	90	2004	2	2004-02-16	133	light	female	GA	1	0	0
CMDT	86	4	6	92	2004	2	2004-02-16	133	light	female	GA	1	0	0
CMDT	87	4	1	96	2004	2	2004-02-16	133	light	female	GA	1	0	0
CMDT	89	9	11	93	2004	2	2004-02-18	652	light	female	GA	1	0	0
CMDT	90	44	7	85	2004	2	2004-02-19	122	light	female	GA	1	0	0
CMDT	91	44	4	87	2004	2	2004-02-19	122	light	female	GA	1	0	0
CMDT	92	44	13	90	2004	2	2004-02-19	122	light	female	GA	1	0	0
CMDT	93	44	12	91	2004	2	2004-02-19	122	light	female	GA	1	0	0
CMDT	94	44	1	99	2004	2	2004-02-19	122	light	female	GA	1	0	0
CMDT	98	16	7	73	2004	2	2004-02-26	917	light	female	GA	1	0	0
CMDT	99	16	1	86	2004	2	2004-02-26	917	light	female	GA	1	0	0
CMDT	100	16	9	88	2004	2	2004-02-26	917	light	female	GA	1	0	0
CMDT	101	16	10	89	2004	2	2004-02-26	917	light	female	GA	1	0	0
CMDT	102	16	2	90	2004	2	2004-02-26	917	light	female	GA	1	0	0
CMDT	103	16	5	90	2004	2	2004-02-26	917	light	female	GA	1	0	0
CMDT	104	16	6	91	2004	2	2004-02-26	917	light	female	GA	1	0	0
CMDT	105	16	8	93	2004	2	2004-02-26	917	light	female	GA	1	0	0
CMDT	106	45	9	85	2004	3	2004-03-02	389	light	female	GA	1	0	0
CMDT	107	45	4		2004	3	2004-03-02	389	light	female	GA	1	0	0
CMDT	108	45	8		2004	3	2004-03-02	389	light	female	GA	1	0	0
CMDT	109	42	8	80	2004	3	2004-03-03	955	light	female	GA	1	0	0
CMDT	110	42	19	84	2004	3	2004-03-03	955	light	female	GA	1	0	0
CMDT	111	42	13	85	2004	3	2004-03-03	955	light	female	GA	1	0	0
CMDT	112	41	25	86	2004	3	2004-03-03	701	light	female	GA	1	0	0
CMDT	113	42	7	87	2004	3	2004-03-03	955	light	female	GA	1	0	0
CMDT	114	41	7	88	2004	3	2004-03-03	701	light	female	GA	1	0	0
CMDT	115	42	23	89	2004	3	2004-03-03	955	light	female	GA	1	0	0
CMDT	116	42	18	90	2004	3	2004-03-03	955	light	female	GA	1	0	0
CMDT	117	41	3	91	2004	3	2004-03-03	701	light	female	GA	1	0	0
CMDT	118	41	10	91	2004	3	2004-03-03	701	light	female	GA	1	0	0
CMDT	119	41	14	91	2004	3	2004-03-03	701	light	female	GA	1	0	0
CMDT	120	42	4	91	2004	3	2004-03-03	955	light	female	GA	1	0	0
CMDT	121	42	14	92	2004	3	2004-03-03	955	light	female	GA	1	0	0
CMDT	122	41	11	93	2004	3	2004-03-03	701	light	female	GA	1	0	0
CMDT	123	41	17	93	2004	3	2004-03-03	701	light	female	GA	1	0	0
CMDT	124	42	1	93	2004	3	2004-03-03	955	light	female	GA	1	0	0
CMDT	125	41	24	95	2004	3	2004-03-03	701	light	female	GA	1	0	0
CMDT	155	21	6	79	2004	3	2004-03-22	35	light	female	GA	1	0	0
CMDT	156	5	10	80	2004	3	2004-03-22	1382	light	female	GA	1	0	0
CMDT	157	5	4	86	2004	3	2004-03-22	1382	light	female	GA	1	0	0
CMDT	158	5	9	87	2004	3	2004-03-22	1382	light	female	GA	1	0	0
CMDT	159	5	2	88	2004	3	2004-03-22	1382	light	female	GA	1	0	0
CMDT	160	5	5	91	2004	3	2004-03-22	1382	light	female	GA	1	0	0
CMDT	161	21	9	91	2004	3	2004-03-22	35	light	female	GA	1	0	0
CMDT	162	5	3	95	2004	3	2004-03-22	1382	light	female	GA	1	0	0
CMDT	163	21	7	97	2004	3	2004-03-22	35	light	female	GA	1	0	0
CMDT	164	21	3	100	2004	3	2004-03-22	35	light	female	GA	1	0	0
CMDT	166	3	6	84	2004	3	2004-03-23	1472	light	female	GA	1	0	0
CMDT	167	3	10	84	2004	3	2004-03-23	1472	light	female	GA	1	0	0
CMDT	168	3	3	87	2004	3	2004-03-23	1472	light	female	GA	1	0	0
CMDT	169	3	5	88	2004	3	2004-03-23	1472	light	female	GA	1	0	0
CMDT	170	3	1	89	2004	3	2004-03-23	1472	light	female	GA	1	0	0
CMDT	171	3	7	91	2004	3	2004-03-23	1472	light	female	GA	1	0	0
CMDT	172	3	8	94	2004	3	2004-03-23	1472	light	female	GA	1	0	0
CMDT	173	3	4	97	2004	3	2004-03-23	1472	light	female	GA	1	0	0
CMDT	194	13	7	77	2004	4	2004-04-08	1527	light	female	GA	1	0	0
CMDT	195	13	6	83	2004	4	2004-04-08	1527	light	female	GA	1	0	0
CMDT	196	13	1	84	2004	4	2004-04-08	1527	light	female	GA	1	0	0
CMDT	197	13	5	84	2004	4	2004-04-08	1527	light	female	GA	1	0	0
CMDT	198	13	4	85	2004	4	2004-04-08	1527	light	female	GA	1	0	0
CMDT	199	13	8	86	2004	4	2004-04-08	1527	light	female	GA	1	0	0
CMDT	200	13	9	89	2004	4	2004-04-08	1527	light	female	GA	1	0	0
CMDT	201	13	10	91	2004	4	2004-04-08	1527	light	female	GA	1	0	0
CMDT	202	13	2	95	2004	4	2004-04-08	1527	light	female	GA	1	0	0
CMDT	203	13	3	95	2004	4	2004-04-08	1527	light	female	GA	1	0	0
CMDT	204	17	7	78	2004	4	2004-04-14	259	light	female	GA	1	0	0
CMDT	205	17	10	79	2004	4	2004-04-14	259	light	female	GA	1	0	0
CMDT	206	17	3	80	2004	4	2004-04-14	259	light	female	GA	1	0	0
CMDT	207	17	8	84	2004	4	2004-04-14	259	light	female	GA	1	0	0
CMDT	208	17	9	84	2004	4	2004-04-14	259	light	female	GA	1	0	0
CMDT	209	17	5	86	2004	4	2004-04-14	259	light	female	GA	1	0	0
CMDT	210	17	6	90	2004	4	2004-04-14	259	light	female	GA	1	0	0
CMDT	211	17	4	95	2004	4	2004-04-14	259	light	female	GA	1	0	0
CMDT	212	17	1	96	2004	4	2004-04-14	259	light	female	GA	1	0	0
CMDT	213	17	2	97	2004	4	2004-04-14	259	light	female	GA	1	0	0
CMDT	214	14	4	79	2004	4	2004-04-26	1345	light	female	GA	1	0	0
CMDT	215	14	8	83	2004	4	2004-04-26	1345	light	female	GA	1	0	0
CMDT	216	14	5	84	2004	4	2004-04-26	1345	light	female	GA	1	0	0
CMDT	217	14	10	84	2004	4	2004-04-26	1345	light	female	GA	1	0	0
CMDT	218	14	7	86	2004	4	2004-04-26	1345	light	female	GA	1	0	0
CMDT	219	14	1	90	2004	4	2004-04-26	1345	light	female	GA	1	0	0
CMDT	220	14	2	93	2004	4	2004-04-26	1345	light	female	GA	1	0	0
CMDT	221	14	9	95	2004	4	2004-04-26	1345	light	female	GA	1	0	0
CMDT	222	14	3	103	2004	4	2004-04-26	1345	light	female	GA	1	0	0
CMDT	223	14	6	107	2004	4	2004-04-26	1345	light	female	GA	1	0	0
CMDT	227	12	4	82	2004	4	2004-04-28	259	light	female	GA	1	0	0
CMDT	228	12	7	88	2004	4	2004-04-28	259	light	female	GA	1	0	0
CMDT	229	12	9	92	2004	4	2004-04-28	259	light	female	GA	1	0	0
CMDT	230	12	8	94	2004	4	2004-04-28	259	light	female	GA	1	0	0
CMDT	231	12	5	97	2004	4	2004-04-28	259	light	female	GA	1	0	0
CMDT	232	12	2	99	2004	4	2004-04-28	259	light	female	GA	1	0	0
CMDT	233	12	1	109	2004	4	2004-04-28	259	light	female	GA	1	0	0
CMDT	56	25	7	80	2004	2	2004-02-11	1548	rest	female	GA	1	0	0
CMDT	62	25	8	84	2004	2	2004-02-11	1548	rest	female	GA	1	0	0
CMDT	66	25	4	87	2004	2	2004-02-11	1548	rest	female	GA	1	0	0
CMDT	129	10	4	89	2004	3	2004-03-17	300	saida	female	GA	1	0	0
CMDT	130	10	9	91	2004	3	2004-03-17	300	saida	female	GA	1	0	0
CMDT	131	10	3	93	2004	3	2004-03-17	300	saida	female	GA	1	0	0
CMDT	132	10	2	96	2004	3	2004-03-17	300	saida	female	GA	1	0	0
CMDT	133	10	7	99	2004	3	2004-03-17	300	saida	female	GA	1	0	0
CMDT	134	10	6	101	2004	3	2004-03-17	300	saida	female	GA	1	0	0
CMDT	135	11	6	80	2004	3	2004-03-21	360	saida	female	GA	1	0	0
CMDT	139	11	1	82	2004	3	2004-03-21	360	saida	female	GA	1	0	0
CMDT	140	11	7	85	2004	3	2004-03-21	360	saida	female	GA	1	0	0
CMDT	145	11	4	90	2004	3	2004-03-21	360	saida	female	GA	1	0	0
CMDT	146	11	3	91	2004	3	2004-03-21	360	saida	female	GA	1	0	0
CMDT	147	11	9	93	2004	3	2004-03-21	360	saida	female	GA	1	0	0
CMDT	148	11	2	95	2004	3	2004-03-21	360	saida	female	GA	1	0	0
CMDT	149	11	8	95	2004	3	2004-03-21	360	saida	female	GA	1	0	0
CMDT	150	11	5		2004	3	2004-03-21	360	saida	female	GA	1	0	0
CMDT	151	11	10		2004	3	2004-03-21	360	saida	female	GA	1	0	0
CMDT	174	6	7	78	2004	3	2004-03-24	297	saida	female	GA	1	0	0
CMDT	178	6	3	82	2004	3	2004-03-24	297	saida	female	GA	1	0	0
CMDT	179	6	6	82	2004	3	2004-03-24	297	saida	female	GA	1	0	0
CMDT	182	6	8	84	2004	3	2004-03-24	297	saida	female	GA	1	0	0
CMDT	186	6	4	87	2004	3	2004-03-24	297	saida	female	GA	1	0	0
CMDT	187	6	9	87	2004	3	2004-03-24	297	saida	female	GA	1	0	0
CMDT	188	6	1	88	2004	3	2004-03-24	297	saida	female	GA	1	0	0
CMDT	189	6	2	88	2004	3	2004-03-24	297	saida	female	GA	1	0	0
CMDT	193	6	5	99	2004	3	2004-03-24	297	saida	female	GA	1	0	0
DBL	375	63	9	89	2003	3	2003-03-13	1039	light	female	GA	1	0	0
DBL	376	60	7	84	2003	3	2003-03-13	1005	light	female	ME	0	0	1
DBL	377	63	4	91	2003	3	2003-03-13	1039	light	female	ME	0	0	1
DBL	378	60	1	97	2003	3	2003-03-13	1005	light	female	ME	0	0	1
DBL	379	60	3	97	2003	3	2003-03-13	1005	light	female	ME	0	0	1
DBL	380	60	2	101	2003	3	2003-03-13	1005	light	female	ME	0	0	1
DBL	381	60	4	101	2003	3	2003-03-13	1005	light	female	ME	0	0	1
DBL	382	63	11		2003	3	2003-03-13	1039	light	female	ME	0	0	1
CMDT	95	44	5	90	2004	2	2004-02-19	122	light	female	ME	0	0	1
CMDT	165	5	7	82	2004	3	2004-03-22	1382	light	female	ME	0	0	1
DBL	425	80	10	82	2003	4	2003-04-08	1133	rest	male	AR	0	1	0
DBL	428	80	8	86	2003	4	2003-04-08	1133	rest	male	AR	0	1	0
CMDT	33	26	7	88	2004	2	2004-02-05	1347	saida	male	AR	0	1	0
CMDT	34	26	5	90	2004	2	2004-02-05	1347	saida	male	AR	0	1	0
DBL	433	80	9	80	2003	4	2003-04-08	1133	rest	male	GA	1	0	0
DBL	434	80	13	81	2003	4	2003-04-08	1133	rest	male	GA	1	0	0
DBL	436	80	11	83	2003	4	2003-04-08	1133	rest	male	GA	1	0	0
DBL	437	80	12		2003	4	2003-04-08	1133	rest	male	GA	1	0	0
CMDT	35	26	10	88	2004	2	2004-02-05	1347	saida	male	GA	1	0	0
CMDT	36	26	3	90	2004	2	2004-02-05	1347	saida	male	GA	1	0	0
CMDT	136	11	13	80	2004	3	2004-03-21	360	saida	male	GA	1	0	0
CMDT	137	11	14	80	2004	3	2004-03-21	360	saida	male	GA	1	0	0
CMDT	138	11	16	80	2004	3	2004-03-21	360	saida	male	GA	1	0	0
CMDT	141	11	15	85	2004	3	2004-03-21	360	saida	male	GA	1	0	0
CMDT	142	11	17	86	2004	3	2004-03-21	360	saida	male	GA	1	0	0
CMDT	143	11	11	89	2004	3	2004-03-21	360	saida	male	GA	1	0	0
CMDT	144	11	18	89	2004	3	2004-03-21	360	saida	male	GA	1	0	0
CMDT	152	11	12		2004	3	2004-03-21	360	saida	male	GA	1	0	0
CMDT	175	6	14	80	2004	3	2004-03-24	297	saida	male	GA	1	0	0
CMDT	176	6	17	80	2004	3	2004-03-24	297	saida	male	GA	1	0	0
CMDT	177	6	20	80	2004	3	2004-03-24	297	saida	male	GA	1	0	0
CMDT	180	6	12	82	2004	3	2004-03-24	297	saida	male	GA	1	0	0
CMDT	181	6	19	82	2004	3	2004-03-24	297	saida	male	GA	1	0	0
CMDT	183	6	18	84	2004	3	2004-03-24	297	saida	male	GA	1	0	0
CMDT	184	6	10	86	2004	3	2004-03-24	297	saida	male	GA	1	0	0
CMDT	185	6	13	86	2004	3	2004-03-24	297	saida	male	GA	1	0	0
CMDT	190	6	11	88	2004	3	2004-03-24	297	saida	male	GA	1	0	0
CMDT	191	6	15	88	2004	3	2004-03-24	297	saida	male	GA	1	0	0
CMDT	192	6	16	92	2004	3	2004-03-24	297	saida	male	GA	1	0	0
CMDT	88	8	1	84	2004	2	2004-02-17	swarm	swarm	male	GA	1	0	0
												26	4		0.866667	0.133333
												331	67	9	0.813268	0.164619	0.022113

## Sheet: spp work
Lab	N	Lot	Tube	Size	Year	Month	Date	House	Collection	sex	PCR
CMDT	1	43	1	93	2003	12	2003-12-18	655	L	female	AR
CMDT	2	43	4	88	2003	12	2003-12-18	655	L	female	GA
CMDT	3	43	8	89	2003	12	2003-12-18	655	L	female	GA
CMDT	4	43	2	91	2003	12	2003-12-18	655	L	female	GA
CMDT	5	43	3	91	2003	12	2003-12-18	655	L	female	GA
CMDT	55	27	8	100	2004	2	2004-02-11	35	L	female	AR
CMDT	61	27	5	84	2004	2	2004-02-11	35	L	female	GA
CMDT	76	27	1	94	2004	2	2004-02-11	35	L	female	GA
CMDT	90	44	7	85	2004	2	2004-02-19	122	L	female	GA
CMDT	91	44	4	87	2004	2	2004-02-19	122	L	female	GA
CMDT	92	44	13	90	2004	2	2004-02-19	122	L	female	GA
CMDT	93	44	12	91	2004	2	2004-02-19	122	L	female	GA
CMDT	94	44	1	99	2004	2	2004-02-19	122	L	female	GA
CMDT	95	44	5	90	2004	2	2004-02-19	122	L	female	ME
CMDT	78	4	4	80	2004	2	2004-02-16	133	L	female	GA
CMDT	79	4	8	84	2004	2	2004-02-16	133	L	female	GA
CMDT	80	4	5	85	2004	2	2004-02-16	133	L	female	GA
CMDT	81	4	2	88	2004	2	2004-02-16	133	L	female	GA
CMDT	82	4	7	88	2004	2	2004-02-16	133	L	female	GA
CMDT	83	4	9	88	2004	2	2004-02-16	133	L	female	GA
CMDT	84	4	3	90	2004	2	2004-02-16	133	L	female	GA
CMDT	85	4	10	90	2004	2	2004-02-16	133	L	female	GA
CMDT	86	4	6	92	2004	2	2004-02-16	133	L	female	GA
CMDT	87	4	1	96	2004	2	2004-02-16	133	L	female	GA
CMDT	60	24	5	84	2004	2	2004-02-11	431	L	female	GA
CMDT	65	24	7	87	2004	2	2004-02-11	431	L	female	GA
CMDT	67	24	8	88	2004	2	2004-02-11	431	L	female	GA
CMDT	74	24	1	92	2004	2	2004-02-11	431	L	female	GA
CMDT	58	46	7	83	2004	2	2004-02-11	583	L	female	GA
CMDT	75	46	8	93	2004	2	2004-02-11	583	L	female	GA
CMDT	89	9	11	93	2004	2	2004-02-18	652	L	female	GA
CMDT	96	16	4	90	2004	2	2004-02-26	917	L	female	AR
CMDT	97	16	3	93	2004	2	2004-02-26	917	L	female	AR
CMDT	98	16	7	73	2004	2	2004-02-26	917	L	female	GA
CMDT	17	2	8	84	2004	2	2004-02-03	917	L	female	GA
CMDT	99	16	1	86	2004	2	2004-02-26	917	L	female	GA
CMDT	19	2	3	87	2004	2	2004-02-03	917	L	female	GA
CMDT	20	2	7	88	2004	2	2004-02-03	917	L	female	GA
CMDT	100	16	9	88	2004	2	2004-02-26	917	L	female	GA
CMDT	21	2	6	89	2004	2	2004-02-03	917	L	female	GA
CMDT	22	2	10	89	2004	2	2004-02-03	917	L	female	GA
CMDT	101	16	10	89	2004	2	2004-02-26	917	L	female	GA
CMDT	23	2	2	90	2004	2	2004-02-03	917	L	female	GA
CMDT	24	2	9	90	2004	2	2004-02-03	917	L	female	GA
CMDT	102	16	2	90	2004	2	2004-02-26	917	L	female	GA
CMDT	103	16	5	90	2004	2	2004-02-26	917	L	female	GA
CMDT	104	16	6	91	2004	2	2004-02-26	917	L	female	GA
CMDT	27	2	5	93	2004	2	2004-02-03	917	L	female	GA
CMDT	105	16	8	93	2004	2	2004-02-26	917	L	female	GA
CMDT	28	2	1	94	2004	2	2004-02-03	917	L	female	GA
CMDT	54	23	8	90	2004	2	2004-02-11	1042	L	female	AR
CMDT	59	23	7	84	2004	2	2004-02-11	1042	L	female	GA
CMDT	71	23	4	91	2004	2	2004-02-11	1042	L	female	GA
CMDT	6	28	4	90	2004	2	2004-02-02	1134	L	female	AR
CMDT	7	28	1	91	2004	2	2004-02-02	1134	L	female	AR
CMDT	8	28	5	95	2004	2	2004-02-02	1134	L	female	AR
CMDT	9	28	3	85	2004	2	2004-02-02	1134	L	female	GA
CMDT	10	28	8	86	2004	2	2004-02-02	1134	L	female	GA
CMDT	11	28	6	90	2004	2	2004-02-02	1134	L	female	GA
CMDT	12	28	7	94	2004	2	2004-02-02	1134	L	female	GA
CMDT	13	28	9	94	2004	2	2004-02-02	1134	L	female	GA
CMDT	44	18	4	106	2004	2	2004-02-10	1181	L	female	AR
CMDT	37	1	2	81	2004	2	2004-02-09	1181	L	female	GA
CMDT	45	18	7	86	2004	2	2004-02-10	1181	L	female	GA
CMDT	46	18	3	87	2004	2	2004-02-10	1181	L	female	GA
CMDT	47	18	5	87	2004	2	2004-02-10	1181	L	female	GA
CMDT	48	18	9	87	2004	2	2004-02-10	1181	L	female	GA
CMDT	38	1	5	88	2004	2	2004-02-09	1181	L	female	GA
CMDT	49	18	2	89	2004	2	2004-02-10	1181	L	female	GA
CMDT	50	18	8	89	2004	2	2004-02-10	1181	L	female	GA
CMDT	51	18	6	90	2004	2	2004-02-10	1181	L	female	GA
CMDT	39	1	9	93	2004	2	2004-02-09	1181	L	female	GA
CMDT	40	1	3	95	2004	2	2004-02-09	1181	L	female	GA
CMDT	41	1	10	95	2004	2	2004-02-09	1181	L	female	GA
CMDT	42	1	1	97	2004	2	2004-02-09	1181	L	female	GA
CMDT	43	1	4	99	2004	2	2004-02-09	1181	L	female	GA
CMDT	52	18	1	99	2004	2	2004-02-10	1181	L	female	GA
CMDT	33	26	7	88	2004	2	2004-02-05	1347	saida	male	AR
CMDT	34	26	5	90	2004	2	2004-02-05	1347	saida	male	AR
CMDT	35	26	10	88	2004	2	2004-02-05	1347	saida	male	GA
CMDT	36	26	3	90	2004	2	2004-02-05	1347	saida	male	GA
CMDT	56	25	7	80	2004	2	2004-02-11	1548	r	female	GA
CMDT	62	25	8	84	2004	2	2004-02-11	1548	r	female	GA
CMDT	66	25	4	87	2004	2	2004-02-11	1548	r	female	GA
CMDT	14	7	4	89	2004	2	2004-02-03	2026	L	female	AR
CMDT	15	7	6	80	2004	2	2004-02-03	2026	L	female	GA
CMDT	16	7	3	83	2004	2	2004-02-03	2026	L	female	GA
CMDT	18	7	2	85	2004	2	2004-02-03	2026	L	female	GA
CMDT	25	7	7	90	2004	2	2004-02-03	2026	L	female	GA
CMDT	26	7	8	92	2004	2	2004-02-03	2026	L	female	GA
CMDT	29	7	5	95	2004	2	2004-02-03	2026	L	female	GA
CMDT	30	7	10	98	2004	2	2004-02-03	2026	L	female	GA
CMDT	31	7	1	100	2004	2	2004-02-03	2026	L	female	GA
CMDT	32	7	9	100	2004	2	2004-02-03	2026	L	female	GA
CMDT	53	15	2	90	2004	2	2004-02-11	3021	L	female	AR
CMDT	57	15	3	83	2004	2	2004-02-11	3021	L	female	GA
CMDT	63	15	9	86	2004	2	2004-02-11	3021	L	female	GA
CMDT	64	15	7	87	2004	2	2004-02-11	3021	L	female	GA
CMDT	68	15	8	89	2004	2	2004-02-11	3021	L	female	GA
CMDT	69	15	10	89	2004	2	2004-02-11	3021	L	female	GA
CMDT	70	15	1	91	2004	2	2004-02-11	3021	L	female	GA
CMDT	72	15	5	92	2004	2	2004-02-11	3021	L	female	GA
CMDT	73	15	6	92	2004	2	2004-02-11	3021	L	female	GA
CMDT	77	15	4	99	2004	2	2004-02-11	3021	L	female	GA
CMDT	88	8	1	84	2004	2	2004-02-17	swarm	swarm	male	GA
CMDT	155	21	6	79	2004	3	2004-03-22	35	L	female	GA
CMDT	161	21	9	91	2004	3	2004-03-22	35	L	female	GA
CMDT	163	21	7	97	2004	3	2004-03-22	35	L	female	GA
CMDT	164	21	3	100	2004	3	2004-03-22	35	L	female	GA
CMDT	174	6	7	78	2004	3	2004-03-24	297	s	female	GA
CMDT	175	6	14	80	2004	3	2004-03-24	297	s	male	GA
CMDT	176	6	17	80	2004	3	2004-03-24	297	s	male	GA
CMDT	177	6	20	80	2004	3	2004-03-24	297	s	male	GA
CMDT	178	6	3	82	2004	3	2004-03-24	297	s	female	GA
CMDT	179	6	6	82	2004	3	2004-03-24	297	s	female	GA
CMDT	180	6	12	82	2004	3	2004-03-24	297	s	male	GA
CMDT	181	6	19	82	2004	3	2004-03-24	297	s	male	GA
CMDT	182	6	8	84	2004	3	2004-03-24	297	s	female	GA
CMDT	183	6	18	84	2004	3	2004-03-24	297	s	male	GA
CMDT	184	6	10	86	2004	3	2004-03-24	297	s	male	GA
CMDT	185	6	13	86	2004	3	2004-03-24	297	s	male	GA
CMDT	186	6	4	87	2004	3	2004-03-24	297	s	female	GA
CMDT	187	6	9	87	2004	3	2004-03-24	297	s	female	GA
CMDT	188	6	1	88	2004	3	2004-03-24	297	s	female	GA
CMDT	189	6	2	88	2004	3	2004-03-24	297	s	female	GA
CMDT	190	6	11	88	2004	3	2004-03-24	297	s	male	GA
CMDT	191	6	15	88	2004	3	2004-03-24	297	s	male	GA
CMDT	192	6	16	92	2004	3	2004-03-24	297	s	male	GA
CMDT	193	6	5	99	2004	3	2004-03-24	297	s	female	GA
CMDT	126	10	10	89	2004	3	2004-03-17	300	s	female	AR
CMDT	127	10	5	95	2004	3	2004-03-17	300	s	female	AR
CMDT	128	10	8	95	2004	3	2004-03-17	300	s	female	AR
CMDT	129	10	4	89	2004	3	2004-03-17	300	s	female	GA
CMDT	130	10	9	91	2004	3	2004-03-17	300	s	female	GA
CMDT	131	10	3	93	2004	3	2004-03-17	300	s	female	GA
CMDT	132	10	2	96	2004	3	2004-03-17	300	s	female	GA
CMDT	133	10	7	99	2004	3	2004-03-17	300	s	female	GA
CMDT	134	10	6	101	2004	3	2004-03-17	300	s	female	GA
CMDT	135	11	6	80	2004	3	2004-03-21	360	s	female	GA
CMDT	136	11	13	80	2004	3	2004-03-21	360	s	male	GA
CMDT	137	11	14	80	2004	3	2004-03-21	360	s	male	GA
CMDT	138	11	16	80	2004	3	2004-03-21	360	s	male	GA
CMDT	139	11	1	82	2004	3	2004-03-21	360	s	female	GA
CMDT	140	11	7	85	2004	3	2004-03-21	360	s	female	GA
CMDT	141	11	15	85	2004	3	2004-03-21	360	s	male	GA
CMDT	142	11	17	86	2004	3	2004-03-21	360	s	male	GA
CMDT	143	11	11	89	2004	3	2004-03-21	360	s	male	GA
CMDT	144	11	18	89	2004	3	2004-03-21	360	s	male	GA
CMDT	145	11	4	90	2004	3	2004-03-21	360	s	female	GA
CMDT	146	11	3	91	2004	3	2004-03-21	360	s	female	GA
CMDT	147	11	9	93	2004	3	2004-03-21	360	s	female	GA
CMDT	148	11	2	95	2004	3	2004-03-21	360	s	female	GA
CMDT	149	11	8	95	2004	3	2004-03-21	360	s	female	GA
CMDT	150	11	5		2004	3	2004-03-21	360	s	female	GA
CMDT	151	11	10		2004	3	2004-03-21	360	s	female	GA
CMDT	152	11	12		2004	3	2004-03-21	360	s	male	GA
CMDT	106	45	9	85	2004	3	2004-03-02	389	L	female	GA
CMDT	107	45	4		2004	3	2004-03-02	389	L	female	GA
CMDT	108	45	8		2004	3	2004-03-02	389	L	female	GA
CMDT	112	41	25	86	2004	3	2004-03-03	701	L	female	GA
CMDT	114	41	7	88	2004	3	2004-03-03	701	L	female	GA
CMDT	117	41	3	91	2004	3	2004-03-03	701	L	female	GA
CMDT	118	41	10	91	2004	3	2004-03-03	701	L	female	GA
CMDT	119	41	14	91	2004	3	2004-03-03	701	L	female	GA
CMDT	122	41	11	93	2004	3	2004-03-03	701	L	female	GA
CMDT	123	41	17	93	2004	3	2004-03-03	701	L	female	GA
CMDT	125	41	24	95	2004	3	2004-03-03	701	L	female	GA
CMDT	109	42	8	80	2004	3	2004-03-03	955	L	female	GA
CMDT	110	42	19	84	2004	3	2004-03-03	955	L	female	GA
CMDT	111	42	13	85	2004	3	2004-03-03	955	L	female	GA
CMDT	113	42	7	87	2004	3	2004-03-03	955	L	female	GA
CMDT	115	42	23	89	2004	3	2004-03-03	955	L	female	GA
CMDT	116	42	18	90	2004	3	2004-03-03	955	L	female	GA
CMDT	120	42	4	91	2004	3	2004-03-03	955	L	female	GA
CMDT	121	42	14	92	2004	3	2004-03-03	955	L	female	GA
CMDT	124	42	1	93	2004	3	2004-03-03	955	L	female	GA
CMDT	153	5	1	95	2004	3	2004-03-22	1382	L	female	AR
CMDT	154	5	6	97	2004	3	2004-03-22	1382	L	female	AR
CMDT	156	5	10	80	2004	3	2004-03-22	1382	L	female	GA
CMDT	157	5	4	86	2004	3	2004-03-22	1382	L	female	GA
CMDT	158	5	9	87	2004	3	2004-03-22	1382	L	female	GA
CMDT	159	5	2	88	2004	3	2004-03-22	1382	L	female	GA
CMDT	160	5	5	91	2004	3	2004-03-22	1382	L	female	GA
CMDT	162	5	3	95	2004	3	2004-03-22	1382	L	female	GA
CMDT	165	5	7	82	2004	3	2004-03-22	1382	L	female	ME
CMDT	166	3	6	84	2004	3	2004-03-23	1472	L	female	GA
CMDT	167	3	10	84	2004	3	2004-03-23	1472	L	female	GA
CMDT	168	3	3	87	2004	3	2004-03-23	1472	L	female	GA
CMDT	169	3	5	88	2004	3	2004-03-23	1472	L	female	GA
CMDT	170	3	1	89	2004	3	2004-03-23	1472	L	female	GA
CMDT	171	3	7	91	2004	3	2004-03-23	1472	L	female	GA
CMDT	172	3	8	94	2004	3	2004-03-23	1472	L	female	GA
CMDT	173	3	4	97	2004	3	2004-03-23	1472	L	female	GA
CMDT	224	12	10	97	2004	4	2004-04-28	259	L	female	AR
CMDT	225	12	6	100	2004	4	2004-04-28	259	L	female	AR
CMDT	226	12	3	101	2004	4	2004-04-28	259	L	female	AR
CMDT	204	17	7	78	2004	4	2004-04-14	259	L	female	GA
CMDT	205	17	10	79	2004	4	2004-04-14	259	L	female	GA
CMDT	206	17	3	80	2004	4	2004-04-14	259	L	female	GA
CMDT	227	12	4	82	2004	4	2004-04-28	259	L	female	GA
CMDT	207	17	8	84	2004	4	2004-04-14	259	L	female	GA
CMDT	208	17	9	84	2004	4	2004-04-14	259	L	female	GA
CMDT	209	17	5	86	2004	4	2004-04-14	259	L	female	GA
CMDT	228	12	7	88	2004	4	2004-04-28	259	L	female	GA
CMDT	210	17	6	90	2004	4	2004-04-14	259	L	female	GA
CMDT	229	12	9	92	2004	4	2004-04-28	259	L	female	GA
CMDT	230	12	8	94	2004	4	2004-04-28	259	L	female	GA
CMDT	211	17	4	95	2004	4	2004-04-14	259	L	female	GA
CMDT	212	17	1	96	2004	4	2004-04-14	259	L	female	GA
CMDT	213	17	2	97	2004	4	2004-04-14	259	L	female	GA
CMDT	231	12	5	97	2004	4	2004-04-28	259	L	female	GA
CMDT	232	12	2	99	2004	4	2004-04-28	259	L	female	GA
CMDT	233	12	1	109	2004	4	2004-04-28	259	L	female	GA
CMDT	214	14	4	79	2004	4	2004-04-26	1345	L	female	GA
CMDT	215	14	8	83	2004	4	2004-04-26	1345	L	female	GA
CMDT	216	14	5	84	2004	4	2004-04-26	1345	L	female	GA
CMDT	217	14	10	84	2004	4	2004-04-26	1345	L	female	GA
CMDT	218	14	7	86	2004	4	2004-04-26	1345	L	female	GA
CMDT	219	14	1	90	2004	4	2004-04-26	1345	L	female	GA
CMDT	220	14	2	93	2004	4	2004-04-26	1345	L	female	GA
CMDT	221	14	9	95	2004	4	2004-04-26	1345	L	female	GA
CMDT	222	14	3	103	2004	4	2004-04-26	1345	L	female	GA
CMDT	223	14	6	107	2004	4	2004-04-26	1345	L	female	GA
CMDT	194	13	7	77	2004	4	2004-04-08	1527	L	female	GA
CMDT	195	13	6	83	2004	4	2004-04-08	1527	L	female	GA
CMDT	196	13	1	84	2004	4	2004-04-08	1527	L	female	GA
CMDT	197	13	5	84	2004	4	2004-04-08	1527	L	female	GA
CMDT	198	13	4	85	2004	4	2004-04-08	1527	L	female	GA
CMDT	199	13	8	86	2004	4	2004-04-08	1527	L	female	GA
CMDT	200	13	9	89	2004	4	2004-04-08	1527	L	female	GA
CMDT	201	13	10	91	2004	4	2004-04-08	1527	L	female	GA
CMDT	202	13	2	95	2004	4	2004-04-08	1527	L	female	GA
CMDT	203	13	3	95	2004	4	2004-04-08	1527	L	female	GA
DBL	234	79	1	83	2002	1	2002-01-15	1179	L	female	AR
DBL	235	79	13	87	2002	1	2002-01-15	1179	L	female	AR
DBL	236	79	11	88	2002	1	2002-01-15	1179	L	female	AR
DBL	237	79	7	98	2002	1	2002-01-15	1179	L	female	AR
DBL	238	79	5	80	2002	1	2002-01-15	1179	L	female	GA
DBL	239	79	15	82	2002	1	2002-01-15	1179	L	female	GA
DBL	240	79	6	85	2002	1	2002-01-15	1179	L	female	GA
DBL	241	79	3	86	2002	1	2002-01-15	1179	L	female	GA
DBL	242	79	8	86	2002	1	2002-01-15	1179	L	female	GA
DBL	243	79	2	87	2002	1	2002-01-15	1179	L	female	GA
DBL	244	79	12	88	2002	1	2002-01-15	1179	L	female	GA
DBL	245	79	10	90	2002	1	2002-01-15	1179	L	female	GA
DBL	246	79	4	92	2002	1	2002-01-15	1179	L	female	GA
DBL	247	67	3	95	2002	2	2002-02-14	866	L	female	AR
DBL	248	67	2	79	2002	2	2002-02-14	866	L	female	GA
DBL	249	67	4	84	2002	2	2002-02-14	866	L	female	GA
DBL	250	67	1	96	2002	2	2002-02-14	866	L	female	GA
DBL	251	70	1	85	2002	9	2002-09-15	1127	L	female	AR
DBL	252	70	2	79	2002	9	2002-09-15	1127	L	female	GA
DBL	253	70	3	83	2002	9	2002-09-15	1127	L	female	GA
DBL	265	58	17	79	2002	12	2002-12-16	66	L	female	AR
DBL	266	58	15	82	2002	12	2002-12-16	66	L	female	AR
DBL	267	58	6	85	2002	12	2002-12-16	66	L	female	AR
DBL	268	58	4	86	2002	12	2002-12-16	66	L	female	AR
DBL	269	58	12	87	2002	12	2002-12-16	66	L	female	AR
DBL	270	58	3	88	2002	12	2002-12-16	66	L	female	AR
DBL	271	58	8	91	2002	12	2002-12-16	66	L	female	AR
DBL	272	58	16	80	2002	12	2002-12-16	66	L	female	GA
DBL	273	58	10	84	2002	12	2002-12-16	66	L	female	GA
DBL	274	58	14	84	2002	12	2002-12-16	66	L	female	GA
DBL	275	58	7	86	2002	12	2002-12-16	66	L	female	GA
DBL	276	58	1	87	2002	12	2002-12-16	66	L	female	GA
DBL	277	58	5	87	2002	12	2002-12-16	66	L	female	GA
DBL	278	58	9	88	2002	12	2002-12-16	66	L	female	GA
DBL	279	58	11	90	2002	12	2002-12-16	66	L	female	GA
DBL	280	58	13	93	2002	12	2002-12-16	66	L	female	GA
DBL	281	58	2	95	2002	12	2002-12-16	66	L	female	GA
DBL	254	57	2	92	2002	12	2002-12-11	196	L	female	AR
DBL	256	57	4	84	2002	12	2002-12-11	196	L	female	GA
DBL	258	57	6	86	2002	12	2002-12-11	196	L	female	GA
DBL	259	57	1	87	2002	12	2002-12-11	196	L	female	GA
DBL	260	57	3	87	2002	12	2002-12-11	196	L	female	GA
DBL	261	57	5	91	2002	12	2002-12-11	196	L	female	GA
DBL	255	73	2	82	2002	12	2002-12-11	232	L	female	GA
DBL	257	73	1	85	2002	12	2002-12-11	232	L	female	GA
DBL	262	72	1	80	2002	12	2002-12-13	237	L	female	GA
DBL	263	72	3	80	2002	12	2002-12-13	237	L	female	GA
DBL	264	72	4	81	2002	12	2002-12-13	237	L	female	GA
DBL	284	61	1	76	2002	12	2002-12-18	664	L	female	GA
DBL	287	61	2	83	2002	12	2002-12-18	664	L	female	GA
DBL	282	59	6	86	2002	12	2002-12-18	676	L	female	AR
DBL	283	59	7	88	2002	12	2002-12-18	676	L	female	AR
DBL	285	59	4	79	2002	12	2002-12-18	676	L	female	GA
DBL	286	59	8	82	2002	12	2002-12-18	676	L	female	GA
DBL	288	59	5	84	2002	12	2002-12-18	676	L	female	GA
DBL	289	59	9	89	2002	12	2002-12-18	676	L	female	GA
DBL	290	59	10	89	2002	12	2002-12-18	676	L	female	GA
DBL	291	59	2	96	2002	12	2002-12-18	676	L	female	GA
DBL	292	59	3	100	2002	12	2002-12-18	676	L	female	GA
DBL	295	63a	8	90	2003	1	2003-01-16	179	L	female	AR
DBL	296	63a	9	90	2003	1	2003-01-16	179	L	female	AR
DBL	297	63a	13	90	2003	1	2003-01-16	179	L	female	AR
DBL	298	63a	18	93	2003	1	2003-01-16	179	L	female	AR
DBL	299	63a	5	97	2003	1	2003-01-16	179	L	female	AR
DBL	300	63a	6	99	2003	1	2003-01-16	179	L	female	AR
DBL	302	63a	2	82	2003	1	2003-01-16	179	L	female	GA
DBL	303	63a	16	82	2003	1	2003-01-16	179	L	female	GA
DBL	304	63a	10	83	2003	1	2003-01-16	179	L	female	GA
DBL	305	63a	4	85	2003	1	2003-01-16	179	L	female	GA
DBL	306	63a	12	86	2003	1	2003-01-16	179	L	female	GA
DBL	309	63a	7	87	2003	1	2003-01-16	179	L	female	GA
DBL	310	63a	11	87	2003	1	2003-01-16	179	L	female	GA
DBL	314	63a	14	93	2003	1	2003-01-16	179	L	female	GA
DBL	293	71	10	80	2003	1	2003-01-16	1127	L	female	AR
DBL	294	71	7	88	2003	1	2003-01-16	1127	L	female	AR
DBL	301	71	9	104	2003	1	2003-01-16	1127	L	female	AR
DBL	307	71	2	86	2003	1	2003-01-16	1127	L	female	GA
DBL	308	71	8	86	2003	1	2003-01-16	1127	L	female	GA
DBL	311	71	1	88	2003	1	2003-01-16	1127	L	female	GA
DBL	312	71	3	88	2003	1	2003-01-16	1127	L	female	GA
DBL	313	71	5	92	2003	1	2003-01-16	1127	L	female	GA
DBL	324	78	1	86	2003	3	2003-03-12	10	L	female	AR
DBL	327	78	2	96	2003	3	2003-03-12	10	L	female	AR
DBL	329	78	7	77	2003	3	2003-03-12	10	L	female	GA
DBL	331	78	9	81	2003	3	2003-03-12	10	L	female	GA
DBL	332	78	8	83	2003	3	2003-03-12	10	L	female	GA
DBL	333	78	6	84	2003	3	2003-03-12	10	L	female	GA
DBL	335	78	10	86	2003	3	2003-03-12	10	L	female	GA
DBL	338	78	11	87	2003	3	2003-03-12	10	L	female	GA
DBL	343	78	4	90	2003	3	2003-03-12	10	L	female	GA
DBL	344	78	5	90	2003	3	2003-03-12	10	L	female	GA
DBL	347	78	3	91	2003	3	2003-03-12	10	L	female	GA
DBL	349	78	12	93	2003	3	2003-03-12	10	L	female	GA
DBL	393	69	5	72	2003	3	2003-03-26	35	L	female	GA
DBL	394	69	3	74	2003	3	2003-03-26	35	L	female	GA
DBL	395	69	6	76	2003	3	2003-03-26	35	L	female	GA
DBL	396	69	9	78	2003	3	2003-03-26	35	L	female	GA
DBL	315	68	2	80	2003	3	2003-03-06	35	L	female	GA
DBL	397	69	10	81	2003	3	2003-03-26	35	L	female	GA
DBL	398	69	1	83	2003	3	2003-03-26	35	L	female	GA
DBL	399	69	2	83	2003	3	2003-03-26	35	L	female	GA
DBL	316	68	6	84	2003	3	2003-03-06	35	L	female	GA
DBL	317	68	9	84	2003	3	2003-03-06	35	L	female	GA
DBL	318	68	4	85	2003	3	2003-03-06	35	L	female	GA
DBL	319	68	5	87	2003	3	2003-03-06	35	L	female	GA
DBL	320	68	3	89	2003	3	2003-03-06	35	L	female	GA
DBL	400	69	4	89	2003	3	2003-03-26	35	L	female	GA
DBL	321	68	8	90	2003	3	2003-03-06	35	L	female	GA
DBL	322	68	10	91	2003	3	2003-03-06	35	L	female	GA
DBL	323	68	1	94	2003	3	2003-03-06	35	L	female	GA
DBL	383	74	1	76	2003	3	2003-03-23	237	L-nido	female	GA
DBL	384	74	5	79	2003	3	2003-03-23	237	L-nido	female	GA
DBL	385	74	4	80	2003	3	2003-03-23	237	L-nido	female	GA
DBL	386	74	3	81	2003	3	2003-03-23	237	L-nido	female	GA
DBL	387	74	8	81	2003	3	2003-03-23	237	L-nido	female	GA
DBL	388	74	2	83	2003	3	2003-03-23	237	L-nido	female	GA
DBL	389	74	7	84	2003	3	2003-03-23	237	L-nido	female	GA
DBL	390	74	6	86	2003	3	2003-03-23	237	L-nido	female	GA
DBL	421	65	1	78	2003	3	2003-03-31	695	L	female	GA
DBL	422	65	2	82	2003	3	2003-03-31	695	L	female	GA
DBL	423	65	3	82	2003	3	2003-03-31	695	L	female	GA
DBL	424	65	4	85	2003	3	2003-03-31	695	L	female	GA
DBL	403	62	5	89	2003	3	2003-03-27	706	L	female	AR
DBL	404	62	1	75	2003	3	2003-03-27	706	L	female	GA
DBL	405	62	10	76	2003	3	2003-03-27	706	L	female	GA
DBL	406	62	13	80	2003	3	2003-03-27	706	L	female	GA
DBL	407	62	14	81	2003	3	2003-03-27	706	L	female	GA
DBL	408	62	6	82	2003	3	2003-03-27	706	L	female	GA
DBL	409	62	8	83	2003	3	2003-03-27	706	L	female	GA
DBL	410	62	15	84	2003	3	2003-03-27	706	L	female	GA
DBL	411	62	7	85	2003	3	2003-03-27	706	L	female	GA
DBL	412	62	4	86	2003	3	2003-03-27	706	L	female	GA
DBL	413	62	12	86	2003	3	2003-03-27	706	L	female	GA
DBL	414	62	9	87	2003	3	2003-03-27	706	L	female	GA
DBL	416	62	2	88	2003	3	2003-03-27	706	L	female	GA
DBL	419	62	3	91	2003	3	2003-03-27	706	L	female	GA
DBL	401	62a	7	81	2003	3	2003-03-27	736	r	female	AR
DBL	402	62a	9	85	2003	3	2003-03-27	736	r	female	AR
DBL	415	62a	5	87	2003	3	2003-03-27	736	r	female	GA
DBL	417	62a	1	89	2003	3	2003-03-27	736	r	female	GA
DBL	418	62a	2	89	2003	3	2003-03-27	736	r	female	GA
DBL	420	62a	4	91	2003	3	2003-03-27	736	r	female	GA
DBL	391	64	2	85	2003	3	2003-03-24	815	L	female	AR
DBL	392	64	1	84	2003	3	2003-03-24	815	L	female	GA
DBL	352	60	8	79	2003	3	2003-03-13	1005	L	female	AR
DBL	357	60	11	90	2003	3	2003-03-13	1005	L	female	AR
DBL	359	60	6	92	2003	3	2003-03-13	1005	L	female	AR
DBL	364	60	9	79	2003	3	2003-03-13	1005	L	female	GA
DBL	370	60	10	90	2003	3	2003-03-13	1005	L	female	GA
DBL	372	60	5	93	2003	3	2003-03-13	1005	L	female	GA
DBL	376	60	7	84	2003	3	2003-03-13	1005	L	female	ME
DBL	378	60	1	97	2003	3	2003-03-13	1005	L	female	ME
DBL	379	60	3	97	2003	3	2003-03-13	1005	L	female	ME
DBL	380	60	2	101	2003	3	2003-03-13	1005	L	female	ME
DBL	381	60	4	101	2003	3	2003-03-13	1005	L	female	ME
DBL	353	77	11	79	2003	3	2003-03-13	1010	L	female	AR
DBL	358	77	8	90	2003	3	2003-03-13	1010	L	female	AR
DBL	363	77	12	78	2003	3	2003-03-13	1010	L	female	GA
DBL	368	77	9	87	2003	3	2003-03-13	1010	L	female	GA
DBL	371	77	3	92	2003	3	2003-03-13	1010	L	female	GA
DBL	373	77	2	94	2003	3	2003-03-13	1010	L	female	GA
DBL	354	63	13	82	2003	3	2003-03-13	1039	L	female	AR
DBL	355	63	1	83	2003	3	2003-03-13	1039	L	female	AR
DBL	325	66	2	90	2003	3	2003-03-12	1039	L	female	AR
DBL	326	66	3	95	2003	3	2003-03-12	1039	L	female	AR
DBL	328	66	7	96	2003	3	2003-03-12	1039	L	female	AR
DBL	361	63	6		2003	3	2003-03-13	1039	L	female	AR
DBL	362	63	10		2003	3	2003-03-13	1039	L	female	AR
DBL	330	66	13	77	2003	3	2003-03-12	1039	L	female	GA
DBL	365	63	14	82	2003	3	2003-03-13	1039	L	female	GA
DBL	334	66	4	85	2003	3	2003-03-12	1039	L	female	GA
DBL	336	66	10	86	2003	3	2003-03-12	1039	L	female	GA
DBL	366	63	3	86	2003	3	2003-03-13	1039	L	female	GA
DBL	367	63	8	86	2003	3	2003-03-13	1039	L	female	GA
DBL	339	66	6	87	2003	3	2003-03-12	1039	L	female	GA
DBL	340	66	11	87	2003	3	2003-03-12	1039	L	female	GA
DBL	345	66	1	90	2003	3	2003-03-12	1039	L	female	GA
DBL	346	66	9	90	2003	3	2003-03-12	1039	L	female	GA
DBL	350	66	8	93	2003	3	2003-03-12	1039	L	female	GA
DBL	374	63	12	94	2003	3	2003-03-13	1039	L	female	GA
DBL	351	66	5	98	2003	3	2003-03-12	1039	L	female	GA
DBL	375	63	9	89	2003	3	2003-03-13	1039	L	female	GA
DBL	377	63	4	91	2003	3	2003-03-13	1039	L	female	ME
DBL	382	63	11		2003	3	2003-03-13	1039	L	female	ME
DBL	356	76	12	88	2003	3	2003-03-13	1044	L	female	AR
DBL	360	76	6	94	2003	3	2003-03-13	1044	L	female	AR
DBL	337	75	9	86	2003	3	2003-03-12	1044	L	female	GA
DBL	369	76	10	87	2003	3	2003-03-13	1044	L	female	GA
DBL	341	75	12	88	2003	3	2003-03-12	1044	L	female	GA
DBL	342	75	11	89	2003	3	2003-03-12	1044	L	female	GA
DBL	348	75	7	92	2003	3	2003-03-12	1044	L	female	GA
DBL	425	80	10	82	2003	4	2003-04-08	1133	r	male	AR
DBL	426	80	3	85	2003	4	2003-04-08	1133	r	female	AR
DBL	427	80	4	85	2003	4	2003-04-08	1133	r	female	AR
DBL	428	80	8	86	2003	4	2003-04-08	1133	r	male	AR
DBL	429	80	7	90	2003	4	2003-04-08	1133	r	female	AR
DBL	430	80	2	71	2003	4	2003-04-08	1133	r	female	GA
DBL	431	80	1	74	2003	4	2003-04-08	1133	r	female	GA
DBL	432	80	6	77	2003	4	2003-04-08	1133	r	female	GA
DBL	433	80	9	80	2003	4	2003-04-08	1133	r	male	GA
DBL	434	80	13	81	2003	4	2003-04-08	1133	r	male	GA
DBL	435	80	5	82	2003	4	2003-04-08	1133	r	female	GA
DBL	436	80	11	83	2003	4	2003-04-08	1133	r	male	GA
DBL	437	80	12		2003	4	2003-04-08	1133	r	male	GA

## Sheet: sizes work
Lab	N	Lot	Tube	Size	Year	Month	Date	House	Collection	sex	PCR
DBL	265	58	17	79	2002	12	2002-12-16	66	L	female	AR
DBL	266	58	15	82	2002	12	2002-12-16	66	L	female	AR
DBL	267	58	6	85	2002	12	2002-12-16	66	L	female	AR
DBL	268	58	4	86	2002	12	2002-12-16	66	L	female	AR
DBL	269	58	12	87	2002	12	2002-12-16	66	L	female	AR
DBL	270	58	3	88	2002	12	2002-12-16	66	L	female	AR
DBL	271	58	8	91	2002	12	2002-12-16	66	L	female	AR
DBL	272	58	16	80	2002	12	2002-12-16	66	L	female	GA
DBL	273	58	10	84	2002	12	2002-12-16	66	L	female	GA
DBL	274	58	14	84	2002	12	2002-12-16	66	L	female	GA
DBL	275	58	7	86	2002	12	2002-12-16	66	L	female	GA
DBL	276	58	1	87	2002	12	2002-12-16	66	L	female	GA
DBL	277	58	5	87	2002	12	2002-12-16	66	L	female	GA
DBL	278	58	9	88	2002	12	2002-12-16	66	L	female	GA
DBL	279	58	11	90	2002	12	2002-12-16	66	L	female	GA
DBL	280	58	13	93	2002	12	2002-12-16	66	L	female	GA
DBL	281	58	2	95	2002	12	2002-12-16	66	L	female	GA
DBL	254	57	2	92	2002	12	2002-12-11	196	L	female	AR
DBL	256	57	4	84	2002	12	2002-12-11	196	L	female	GA
DBL	258	57	6	86	2002	12	2002-12-11	196	L	female	GA
DBL	259	57	1	87	2002	12	2002-12-11	196	L	female	GA
DBL	260	57	3	87	2002	12	2002-12-11	196	L	female	GA
DBL	261	57	5	91	2002	12	2002-12-11	196	L	female	GA
DBL	255	73	2	82	2002	12	2002-12-11	232	L	female	GA
DBL	257	73	1	85	2002	12	2002-12-11	232	L	female	GA
DBL	262	72	1	80	2002	12	2002-12-13	237	L	female	GA
DBL	263	72	3	80	2002	12	2002-12-13	237	L	female	GA
DBL	264	72	4	81	2002	12	2002-12-13	237	L	female	GA
DBL	284	61	1	76	2002	12	2002-12-18	664	L	female	GA
DBL	287	61	2	83	2002	12	2002-12-18	664	L	female	GA
DBL	282	59	6	86	2002	12	2002-12-18	676	L	female	AR
DBL	283	59	7	88	2002	12	2002-12-18	676	L	female	AR
DBL	285	59	4	79	2002	12	2002-12-18	676	L	female	GA
DBL	286	59	8	82	2002	12	2002-12-18	676	L	female	GA
DBL	288	59	5	84	2002	12	2002-12-18	676	L	female	GA
DBL	289	59	9	89	2002	12	2002-12-18	676	L	female	GA
DBL	290	59	10	89	2002	12	2002-12-18	676	L	female	GA
DBL	291	59	2	96	2002	12	2002-12-18	676	L	female	GA
DBL	292	59	3	100	2002	12	2002-12-18	676	L	female	GA
DBL	247	67	3	95	2002	2	2002-02-14	866	L	female	AR
DBL	248	67	2	79	2002	2	2002-02-14	866	L	female	GA
DBL	249	67	4	84	2002	2	2002-02-14	866	L	female	GA
DBL	250	67	1	96	2002	2	2002-02-14	866	L	female	GA
DBL	251	70	1	85	2002	9	2002-09-15	1127	L	female	AR
DBL	252	70	2	79	2002	9	2002-09-15	1127	L	female	GA
DBL	253	70	3	83	2002	9	2002-09-15	1127	L	female	GA
DBL	234	79	1	83	2002	1	2002-01-15	1179	L	female	AR
DBL	235	79	13	87	2002	1	2002-01-15	1179	L	female	AR
DBL	236	79	11	88	2002	1	2002-01-15	1179	L	female	AR
DBL	237	79	7	98	2002	1	2002-01-15	1179	L	female	AR
DBL	238	79	5	80	2002	1	2002-01-15	1179	L	female	GA
DBL	239	79	15	82	2002	1	2002-01-15	1179	L	female	GA
DBL	240	79	6	85	2002	1	2002-01-15	1179	L	female	GA
DBL	241	79	3	86	2002	1	2002-01-15	1179	L	female	GA
DBL	242	79	8	86	2002	1	2002-01-15	1179	L	female	GA
DBL	243	79	2	87	2002	1	2002-01-15	1179	L	female	GA
DBL	244	79	12	88	2002	1	2002-01-15	1179	L	female	GA
DBL	245	79	10	90	2002	1	2002-01-15	1179	L	female	GA
DBL	246	79	4	92	2002	1	2002-01-15	1179	L	female	GA
DBL	324	78	1	86	2003	3	2003-03-12	10	L	female	AR
DBL	327	78	2	96	2003	3	2003-03-12	10	L	female	AR
DBL	329	78	7	77	2003	3	2003-03-12	10	L	female	GA
DBL	331	78	9	81	2003	3	2003-03-12	10	L	female	GA
DBL	332	78	8	83	2003	3	2003-03-12	10	L	female	GA
DBL	333	78	6	84	2003	3	2003-03-12	10	L	female	GA
DBL	335	78	10	86	2003	3	2003-03-12	10	L	female	GA
DBL	338	78	11	87	2003	3	2003-03-12	10	L	female	GA
DBL	343	78	4	90	2003	3	2003-03-12	10	L	female	GA
DBL	344	78	5	90	2003	3	2003-03-12	10	L	female	GA
DBL	347	78	3	91	2003	3	2003-03-12	10	L	female	GA
DBL	349	78	12	93	2003	3	2003-03-12	10	L	female	GA
DBL	393	69	5	72	2003	3	2003-03-26	35	L	female	GA
DBL	394	69	3	74	2003	3	2003-03-26	35	L	female	GA
DBL	395	69	6	76	2003	3	2003-03-26	35	L	female	GA
DBL	396	69	9	78	2003	3	2003-03-26	35	L	female	GA
DBL	315	68	2	80	2003	3	2003-03-06	35	L	female	GA
DBL	397	69	10	81	2003	3	2003-03-26	35	L	female	GA
DBL	398	69	1	83	2003	3	2003-03-26	35	L	female	GA
DBL	399	69	2	83	2003	3	2003-03-26	35	L	female	GA
DBL	316	68	6	84	2003	3	2003-03-06	35	L	female	GA
DBL	317	68	9	84	2003	3	2003-03-06	35	L	female	GA
DBL	318	68	4	85	2003	3	2003-03-06	35	L	female	GA
DBL	319	68	5	87	2003	3	2003-03-06	35	L	female	GA
DBL	320	68	3	89	2003	3	2003-03-06	35	L	female	GA
DBL	400	69	4	89	2003	3	2003-03-26	35	L	female	GA
DBL	321	68	8	90	2003	3	2003-03-06	35	L	female	GA
DBL	322	68	10	91	2003	3	2003-03-06	35	L	female	GA
DBL	323	68	1	94	2003	3	2003-03-06	35	L	female	GA
DBL	295	63a	8	90	2003	1	2003-01-16	179	L	female	AR
DBL	296	63a	9	90	2003	1	2003-01-16	179	L	female	AR
DBL	297	63a	13	90	2003	1	2003-01-16	179	L	female	AR
DBL	298	63a	18	93	2003	1	2003-01-16	179	L	female	AR
DBL	299	63a	5	97	2003	1	2003-01-16	179	L	female	AR
DBL	300	63a	6	99	2003	1	2003-01-16	179	L	female	AR
DBL	302	63a	2	82	2003	1	2003-01-16	179	L	female	GA
DBL	303	63a	16	82	2003	1	2003-01-16	179	L	female	GA
DBL	304	63a	10	83	2003	1	2003-01-16	179	L	female	GA
DBL	305	63a	4	85	2003	1	2003-01-16	179	L	female	GA
DBL	306	63a	12	86	2003	1	2003-01-16	179	L	female	GA
DBL	309	63a	7	87	2003	1	2003-01-16	179	L	female	GA
DBL	310	63a	11	87	2003	1	2003-01-16	179	L	female	GA
DBL	314	63a	14	93	2003	1	2003-01-16	179	L	female	GA
DBL	383	74	1	76	2003	3	2003-03-23	237	L-nido	female	GA
DBL	384	74	5	79	2003	3	2003-03-23	237	L-nido	female	GA
DBL	385	74	4	80	2003	3	2003-03-23	237	L-nido	female	GA
DBL	386	74	3	81	2003	3	2003-03-23	237	L-nido	female	GA
DBL	387	74	8	81	2003	3	2003-03-23	237	L-nido	female	GA
DBL	388	74	2	83	2003	3	2003-03-23	237	L-nido	female	GA
DBL	389	74	7	84	2003	3	2003-03-23	237	L-nido	female	GA
DBL	390	74	6	86	2003	3	2003-03-23	237	L-nido	female	GA
CMDT	1	43	1	93	2003	12	2003-12-18	655	L	female	AR
CMDT	2	43	4	88	2003	12	2003-12-18	655	L	female	GA
CMDT	3	43	8	89	2003	12	2003-12-18	655	L	female	GA
CMDT	4	43	2	91	2003	12	2003-12-18	655	L	female	GA
CMDT	5	43	3	91	2003	12	2003-12-18	655	L	female	GA
DBL	421	65	1	78	2003	3	2003-03-31	695	L	female	GA
DBL	422	65	2	82	2003	3	2003-03-31	695	L	female	GA
DBL	423	65	3	82	2003	3	2003-03-31	695	L	female	GA
DBL	424	65	4	85	2003	3	2003-03-31	695	L	female	GA
DBL	403	62	5	89	2003	3	2003-03-27	706	L	female	AR
DBL	404	62	1	75	2003	3	2003-03-27	706	L	female	GA
DBL	405	62	10	76	2003	3	2003-03-27	706	L	female	GA
DBL	406	62	13	80	2003	3	2003-03-27	706	L	female	GA
DBL	407	62	14	81	2003	3	2003-03-27	706	L	female	GA
DBL	408	62	6	82	2003	3	2003-03-27	706	L	female	GA
DBL	409	62	8	83	2003	3	2003-03-27	706	L	female	GA
DBL	410	62	15	84	2003	3	2003-03-27	706	L	female	GA
DBL	411	62	7	85	2003	3	2003-03-27	706	L	female	GA
DBL	412	62	4	86	2003	3	2003-03-27	706	L	female	GA
DBL	413	62	12	86	2003	3	2003-03-27	706	L	female	GA
DBL	414	62	9	87	2003	3	2003-03-27	706	L	female	GA
DBL	416	62	2	88	2003	3	2003-03-27	706	L	female	GA
DBL	419	62	3	91	2003	3	2003-03-27	706	L	female	GA
DBL	401	62a	7	81	2003	3	2003-03-27	736	r	female	AR
DBL	402	62a	9	85	2003	3	2003-03-27	736	r	female	AR
DBL	415	62a	5	87	2003	3	2003-03-27	736	r	female	GA
DBL	417	62a	1	89	2003	3	2003-03-27	736	r	female	GA
DBL	418	62a	2	89	2003	3	2003-03-27	736	r	female	GA
DBL	420	62a	4	91	2003	3	2003-03-27	736	r	female	GA
DBL	391	64	2	85	2003	3	2003-03-24	815	L	female	AR
DBL	392	64	1	84	2003	3	2003-03-24	815	L	female	GA
DBL	352	60	8	79	2003	3	2003-03-13	1005	L	female	AR
DBL	357	60	11	90	2003	3	2003-03-13	1005	L	female	AR
DBL	359	60	6	92	2003	3	2003-03-13	1005	L	female	AR
DBL	364	60	9	79	2003	3	2003-03-13	1005	L	female	GA
DBL	370	60	10	90	2003	3	2003-03-13	1005	L	female	GA
DBL	372	60	5	93	2003	3	2003-03-13	1005	L	female	GA
DBL	376	60	7	84	2003	3	2003-03-13	1005	L	female	ME
DBL	378	60	1	97	2003	3	2003-03-13	1005	L	female	ME
DBL	379	60	3	97	2003	3	2003-03-13	1005	L	female	ME
DBL	380	60	2	101	2003	3	2003-03-13	1005	L	female	ME
DBL	381	60	4	101	2003	3	2003-03-13	1005	L	female	ME
DBL	353	77	11	79	2003	3	2003-03-13	1010	L	female	AR
DBL	358	77	8	90	2003	3	2003-03-13	1010	L	female	AR
DBL	363	77	12	78	2003	3	2003-03-13	1010	L	female	GA
DBL	368	77	9	87	2003	3	2003-03-13	1010	L	female	GA
DBL	371	77	3	92	2003	3	2003-03-13	1010	L	female	GA
DBL	373	77	2	94	2003	3	2003-03-13	1010	L	female	GA
DBL	354	63	13	82	2003	3	2003-03-13	1039	L	female	AR
DBL	355	63	1	83	2003	3	2003-03-13	1039	L	female	AR
DBL	325	66	2	90	2003	3	2003-03-12	1039	L	female	AR
DBL	326	66	3	95	2003	3	2003-03-12	1039	L	female	AR
DBL	328	66	7	96	2003	3	2003-03-12	1039	L	female	AR
DBL	330	66	13	77	2003	3	2003-03-12	1039	L	female	GA
DBL	365	63	14	82	2003	3	2003-03-13	1039	L	female	GA
DBL	334	66	4	85	2003	3	2003-03-12	1039	L	female	GA
DBL	336	66	10	86	2003	3	2003-03-12	1039	L	female	GA
DBL	366	63	3	86	2003	3	2003-03-13	1039	L	female	GA
DBL	367	63	8	86	2003	3	2003-03-13	1039	L	female	GA
DBL	339	66	6	87	2003	3	2003-03-12	1039	L	female	GA
DBL	340	66	11	87	2003	3	2003-03-12	1039	L	female	GA
DBL	345	66	1	90	2003	3	2003-03-12	1039	L	female	GA
DBL	346	66	9	90	2003	3	2003-03-12	1039	L	female	GA
DBL	350	66	8	93	2003	3	2003-03-12	1039	L	female	GA
DBL	374	63	12	94	2003	3	2003-03-13	1039	L	female	GA
DBL	351	66	5	98	2003	3	2003-03-12	1039	L	female	GA
DBL	375	63	9	89	2003	3	2003-03-13	1039	L	female	GA
DBL	377	63	4	91	2003	3	2003-03-13	1039	L	female	ME
DBL	356	76	12	88	2003	3	2003-03-13	1044	L	female	AR
DBL	360	76	6	94	2003	3	2003-03-13	1044	L	female	AR
DBL	337	75	9	86	2003	3	2003-03-12	1044	L	female	GA
DBL	369	76	10	87	2003	3	2003-03-13	1044	L	female	GA
DBL	341	75	12	88	2003	3	2003-03-12	1044	L	female	GA
DBL	342	75	11	89	2003	3	2003-03-12	1044	L	female	GA
DBL	348	75	7	92	2003	3	2003-03-12	1044	L	female	GA
DBL	293	71	10	80	2003	1	2003-01-16	1127	L	female	AR
DBL	294	71	7	88	2003	1	2003-01-16	1127	L	female	AR
DBL	301	71	9	104	2003	1	2003-01-16	1127	L	female	AR
DBL	307	71	2	86	2003	1	2003-01-16	1127	L	female	GA
DBL	308	71	8	86	2003	1	2003-01-16	1127	L	female	GA
DBL	311	71	1	88	2003	1	2003-01-16	1127	L	female	GA
DBL	312	71	3	88	2003	1	2003-01-16	1127	L	female	GA
DBL	313	71	5	92	2003	1	2003-01-16	1127	L	female	GA
DBL	425	80	10	82	2003	4	2003-04-08	1133	r	male	AR
DBL	426	80	3	85	2003	4	2003-04-08	1133	r	female	AR
DBL	427	80	4	85	2003	4	2003-04-08	1133	r	female	AR
DBL	428	80	8	86	2003	4	2003-04-08	1133	r	male	AR
DBL	429	80	7	90	2003	4	2003-04-08	1133	r	female	AR
DBL	430	80	2	71	2003	4	2003-04-08	1133	r	female	GA
DBL	431	80	1	74	2003	4	2003-04-08	1133	r	female	GA
DBL	432	80	6	77	2003	4	2003-04-08	1133	r	female	GA
DBL	433	80	9	80	2003	4	2003-04-08	1133	r	male	GA
DBL	434	80	13	81	2003	4	2003-04-08	1133	r	male	GA
DBL	435	80	5	82	2003	4	2003-04-08	1133	r	female	GA
DBL	436	80	11	83	2003	4	2003-04-08	1133	r	male	GA
CMDT	55	27	8	100	2004	2	2004-02-11	35	L	female	AR
CMDT	155	21	6	79	2004	3	2004-03-22	35	L	female	GA
CMDT	61	27	5	84	2004	2	2004-02-11	35	L	female	GA
CMDT	161	21	9	91	2004	3	2004-03-22	35	L	female	GA
CMDT	76	27	1	94	2004	2	2004-02-11	35	L	female	GA
CMDT	163	21	7	97	2004	3	2004-03-22	35	L	female	GA
CMDT	164	21	3	100	2004	3	2004-03-22	35	L	female	GA
CMDT	90	44	7	85	2004	2	2004-02-19	122	L	female	GA
CMDT	91	44	4	87	2004	2	2004-02-19	122	L	female	GA
CMDT	92	44	13	90	2004	2	2004-02-19	122	L	female	GA
CMDT	93	44	12	91	2004	2	2004-02-19	122	L	female	GA
CMDT	94	44	1	99	2004	2	2004-02-19	122	L	female	GA
CMDT	95	44	5	90	2004	2	2004-02-19	122	L	female	ME
CMDT	78	4	4	80	2004	2	2004-02-16	133	L	female	GA
CMDT	79	4	8	84	2004	2	2004-02-16	133	L	female	GA
CMDT	80	4	5	85	2004	2	2004-02-16	133	L	female	GA
CMDT	81	4	2	88	2004	2	2004-02-16	133	L	female	GA
CMDT	82	4	7	88	2004	2	2004-02-16	133	L	female	GA
CMDT	83	4	9	88	2004	2	2004-02-16	133	L	female	GA
CMDT	84	4	3	90	2004	2	2004-02-16	133	L	female	GA
CMDT	85	4	10	90	2004	2	2004-02-16	133	L	female	GA
CMDT	86	4	6	92	2004	2	2004-02-16	133	L	female	GA
CMDT	87	4	1	96	2004	2	2004-02-16	133	L	female	GA
CMDT	224	12	10	97	2004	4	2004-04-28	259	L	female	AR
CMDT	225	12	6	100	2004	4	2004-04-28	259	L	female	AR
CMDT	226	12	3	101	2004	4	2004-04-28	259	L	female	AR
CMDT	204	17	7	78	2004	4	2004-04-14	259	L	female	GA
CMDT	205	17	10	79	2004	4	2004-04-14	259	L	female	GA
CMDT	206	17	3	80	2004	4	2004-04-14	259	L	female	GA
CMDT	227	12	4	82	2004	4	2004-04-28	259	L	female	GA
CMDT	207	17	8	84	2004	4	2004-04-14	259	L	female	GA
CMDT	208	17	9	84	2004	4	2004-04-14	259	L	female	GA
CMDT	209	17	5	86	2004	4	2004-04-14	259	L	female	GA
CMDT	228	12	7	88	2004	4	2004-04-28	259	L	female	GA
CMDT	210	17	6	90	2004	4	2004-04-14	259	L	female	GA
CMDT	229	12	9	92	2004	4	2004-04-28	259	L	female	GA
CMDT	230	12	8	94	2004	4	2004-04-28	259	L	female	GA
CMDT	211	17	4	95	2004	4	2004-04-14	259	L	female	GA
CMDT	212	17	1	96	2004	4	2004-04-14	259	L	female	GA
CMDT	213	17	2	97	2004	4	2004-04-14	259	L	female	GA
CMDT	231	12	5	97	2004	4	2004-04-28	259	L	female	GA
CMDT	232	12	2	99	2004	4	2004-04-28	259	L	female	GA
CMDT	233	12	1	109	2004	4	2004-04-28	259	L	female	GA
CMDT	174	6	7	78	2004	3	2004-03-24	297	s	female	GA
CMDT	175	6	14	80	2004	3	2004-03-24	297	s	male	GA
CMDT	176	6	17	80	2004	3	2004-03-24	297	s	male	GA
CMDT	177	6	20	80	2004	3	2004-03-24	297	s	male	GA
CMDT	178	6	3	82	2004	3	2004-03-24	297	s	female	GA
CMDT	179	6	6	82	2004	3	2004-03-24	297	s	female	GA
CMDT	180	6	12	82	2004	3	2004-03-24	297	s	male	GA
CMDT	181	6	19	82	2004	3	2004-03-24	297	s	male	GA
CMDT	182	6	8	84	2004	3	2004-03-24	297	s	female	GA
CMDT	183	6	18	84	2004	3	2004-03-24	297	s	male	GA
CMDT	184	6	10	86	2004	3	2004-03-24	297	s	male	GA
CMDT	185	6	13	86	2004	3	2004-03-24	297	s	male	GA
CMDT	186	6	4	87	2004	3	2004-03-24	297	s	female	GA
CMDT	187	6	9	87	2004	3	2004-03-24	297	s	female	GA
CMDT	188	6	1	88	2004	3	2004-03-24	297	s	female	GA
CMDT	189	6	2	88	2004	3	2004-03-24	297	s	female	GA
CMDT	190	6	11	88	2004	3	2004-03-24	297	s	male	GA
CMDT	191	6	15	88	2004	3	2004-03-24	297	s	male	GA
CMDT	192	6	16	92	2004	3	2004-03-24	297	s	male	GA
CMDT	193	6	5	99	2004	3	2004-03-24	297	s	female	GA
CMDT	126	10	10	89	2004	3	2004-03-17	300	s	female	AR
CMDT	127	10	5	95	2004	3	2004-03-17	300	s	female	AR
CMDT	128	10	8	95	2004	3	2004-03-17	300	s	female	AR
CMDT	129	10	4	89	2004	3	2004-03-17	300	s	female	GA
CMDT	130	10	9	91	2004	3	2004-03-17	300	s	female	GA
CMDT	131	10	3	93	2004	3	2004-03-17	300	s	female	GA
CMDT	132	10	2	96	2004	3	2004-03-17	300	s	female	GA
CMDT	133	10	7	99	2004	3	2004-03-17	300	s	female	GA
CMDT	134	10	6	101	2004	3	2004-03-17	300	s	female	GA
CMDT	135	11	6	80	2004	3	2004-03-21	360	s	female	GA
CMDT	136	11	13	80	2004	3	2004-03-21	360	s	male	GA
CMDT	137	11	14	80	2004	3	2004-03-21	360	s	male	GA
CMDT	138	11	16	80	2004	3	2004-03-21	360	s	male	GA
CMDT	139	11	1	82	2004	3	2004-03-21	360	s	female	GA
CMDT	140	11	7	85	2004	3	2004-03-21	360	s	female	GA
CMDT	141	11	15	85	2004	3	2004-03-21	360	s	male	GA
CMDT	142	11	17	86	2004	3	2004-03-21	360	s	male	GA
CMDT	143	11	11	89	2004	3	2004-03-21	360	s	male	GA
CMDT	144	11	18	89	2004	3	2004-03-21	360	s	male	GA
CMDT	145	11	4	90	2004	3	2004-03-21	360	s	female	GA
CMDT	146	11	3	91	2004	3	2004-03-21	360	s	female	GA
CMDT	147	11	9	93	2004	3	2004-03-21	360	s	female	GA
CMDT	148	11	2	95	2004	3	2004-03-21	360	s	female	GA
CMDT	149	11	8	95	2004	3	2004-03-21	360	s	female	GA
CMDT	106	45	9	85	2004	3	2004-03-02	389	L	female	GA
CMDT	60	24	5	84	2004	2	2004-02-11	431	L	female	GA
CMDT	65	24	7	87	2004	2	2004-02-11	431	L	female	GA
CMDT	67	24	8	88	2004	2	2004-02-11	431	L	female	GA
CMDT	74	24	1	92	2004	2	2004-02-11	431	L	female	GA
CMDT	58	46	7	83	2004	2	2004-02-11	583	L	female	GA
CMDT	75	46	8	93	2004	2	2004-02-11	583	L	female	GA
CMDT	89	9	11	93	2004	2	2004-02-18	652	L	female	GA
CMDT	112	41	25	86	2004	3	2004-03-03	701	L	female	GA
CMDT	114	41	7	88	2004	3	2004-03-03	701	L	female	GA
CMDT	117	41	3	91	2004	3	2004-03-03	701	L	female	GA
CMDT	118	41	10	91	2004	3	2004-03-03	701	L	female	GA
CMDT	119	41	14	91	2004	3	2004-03-03	701	L	female	GA
CMDT	122	41	11	93	2004	3	2004-03-03	701	L	female	GA
CMDT	123	41	17	93	2004	3	2004-03-03	701	L	female	GA
CMDT	125	41	24	95	2004	3	2004-03-03	701	L	female	GA
CMDT	96	16	4	90	2004	2	2004-02-26	917	L	female	AR
CMDT	97	16	3	93	2004	2	2004-02-26	917	L	female	AR
CMDT	98	16	7	73	2004	2	2004-02-26	917	L	female	GA
CMDT	17	2	8	84	2004	2	2004-02-03	917	L	female	GA
CMDT	99	16	1	86	2004	2	2004-02-26	917	L	female	GA
CMDT	19	2	3	87	2004	2	2004-02-03	917	L	female	GA
CMDT	20	2	7	88	2004	2	2004-02-03	917	L	female	GA
CMDT	100	16	9	88	2004	2	2004-02-26	917	L	female	GA
CMDT	21	2	6	89	2004	2	2004-02-03	917	L	female	GA
CMDT	22	2	10	89	2004	2	2004-02-03	917	L	female	GA
CMDT	101	16	10	89	2004	2	2004-02-26	917	L	female	GA
CMDT	23	2	2	90	2004	2	2004-02-03	917	L	female	GA
CMDT	24	2	9	90	2004	2	2004-02-03	917	L	female	GA
CMDT	102	16	2	90	2004	2	2004-02-26	917	L	female	GA
CMDT	103	16	5	90	2004	2	2004-02-26	917	L	female	GA
CMDT	104	16	6	91	2004	2	2004-02-26	917	L	female	GA
CMDT	27	2	5	93	2004	2	2004-02-03	917	L	female	GA
CMDT	105	16	8	93	2004	2	2004-02-26	917	L	female	GA
CMDT	28	2	1	94	2004	2	2004-02-03	917	L	female	GA
CMDT	109	42	8	80	2004	3	2004-03-03	955	L	female	GA
CMDT	110	42	19	84	2004	3	2004-03-03	955	L	female	GA
CMDT	111	42	13	85	2004	3	2004-03-03	955	L	female	GA
CMDT	113	42	7	87	2004	3	2004-03-03	955	L	female	GA
CMDT	115	42	23	89	2004	3	2004-03-03	955	L	female	GA
CMDT	116	42	18	90	2004	3	2004-03-03	955	L	female	GA
CMDT	120	42	4	91	2004	3	2004-03-03	955	L	female	GA
CMDT	121	42	14	92	2004	3	2004-03-03	955	L	female	GA
CMDT	124	42	1	93	2004	3	2004-03-03	955	L	female	GA
CMDT	54	23	8	90	2004	2	2004-02-11	1042	L	female	AR
CMDT	59	23	7	84	2004	2	2004-02-11	1042	L	female	GA
CMDT	71	23	4	91	2004	2	2004-02-11	1042	L	female	GA
CMDT	6	28	4	90	2004	2	2004-02-02	1134	L	female	AR
CMDT	7	28	1	91	2004	2	2004-02-02	1134	L	female	AR
CMDT	8	28	5	95	2004	2	2004-02-02	1134	L	female	AR
CMDT	9	28	3	85	2004	2	2004-02-02	1134	L	female	GA
CMDT	10	28	8	86	2004	2	2004-02-02	1134	L	female	GA
CMDT	11	28	6	90	2004	2	2004-02-02	1134	L	female	GA
CMDT	12	28	7	94	2004	2	2004-02-02	1134	L	female	GA
CMDT	13	28	9	94	2004	2	2004-02-02	1134	L	female	GA
CMDT	44	18	4	106	2004	2	2004-02-10	1181	L	female	AR
CMDT	37	1	2	81	2004	2	2004-02-09	1181	L	female	GA
CMDT	45	18	7	86	2004	2	2004-02-10	1181	L	female	GA
CMDT	46	18	3	87	2004	2	2004-02-10	1181	L	female	GA
CMDT	47	18	5	87	2004	2	2004-02-10	1181	L	female	GA
CMDT	48	18	9	87	2004	2	2004-02-10	1181	L	female	GA
CMDT	38	1	5	88	2004	2	2004-02-09	1181	L	female	GA
CMDT	49	18	2	89	2004	2	2004-02-10	1181	L	female	GA
CMDT	50	18	8	89	2004	2	2004-02-10	1181	L	female	GA
CMDT	51	18	6	90	2004	2	2004-02-10	1181	L	female	GA
CMDT	39	1	9	93	2004	2	2004-02-09	1181	L	female	GA
CMDT	40	1	3	95	2004	2	2004-02-09	1181	L	female	GA
CMDT	41	1	10	95	2004	2	2004-02-09	1181	L	female	GA
CMDT	42	1	1	97	2004	2	2004-02-09	1181	L	female	GA
CMDT	43	1	4	99	2004	2	2004-02-09	1181	L	female	GA
CMDT	52	18	1	99	2004	2	2004-02-10	1181	L	female	GA
CMDT	214	14	4	79	2004	4	2004-04-26	1345	L	female	GA
CMDT	215	14	8	83	2004	4	2004-04-26	1345	L	female	GA
CMDT	216	14	5	84	2004	4	2004-04-26	1345	L	female	GA
CMDT	217	14	10	84	2004	4	2004-04-26	1345	L	female	GA
CMDT	218	14	7	86	2004	4	2004-04-26	1345	L	female	GA
CMDT	219	14	1	90	2004	4	2004-04-26	1345	L	female	GA
CMDT	220	14	2	93	2004	4	2004-04-26	1345	L	female	GA
CMDT	221	14	9	95	2004	4	2004-04-26	1345	L	female	GA
CMDT	222	14	3	103	2004	4	2004-04-26	1345	L	female	GA
CMDT	223	14	6	107	2004	4	2004-04-26	1345	L	female	GA
CMDT	33	26	7	88	2004	2	2004-02-05	1347	saida	male	AR
CMDT	34	26	5	90	2004	2	2004-02-05	1347	saida	male	AR
CMDT	35	26	10	88	2004	2	2004-02-05	1347	saida	male	GA
CMDT	36	26	3	90	2004	2	2004-02-05	1347	saida	male	GA
CMDT	153	5	1	95	2004	3	2004-03-22	1382	L	female	AR
CMDT	154	5	6	97	2004	3	2004-03-22	1382	L	female	AR
CMDT	156	5	10	80	2004	3	2004-03-22	1382	L	female	GA
CMDT	157	5	4	86	2004	3	2004-03-22	1382	L	female	GA
CMDT	158	5	9	87	2004	3	2004-03-22	1382	L	female	GA
CMDT	159	5	2	88	2004	3	2004-03-22	1382	L	female	GA
CMDT	160	5	5	91	2004	3	2004-03-22	1382	L	female	GA
CMDT	162	5	3	95	2004	3	2004-03-22	1382	L	female	GA
CMDT	165	5	7	82	2004	3	2004-03-22	1382	L	female	ME
CMDT	166	3	6	84	2004	3	2004-03-23	1472	L	female	GA
CMDT	167	3	10	84	2004	3	2004-03-23	1472	L	female	GA
CMDT	168	3	3	87	2004	3	2004-03-23	1472	L	female	GA
CMDT	169	3	5	88	2004	3	2004-03-23	1472	L	female	GA
CMDT	170	3	1	89	2004	3	2004-03-23	1472	L	female	GA
CMDT	171	3	7	91	2004	3	2004-03-23	1472	L	female	GA
CMDT	172	3	8	94	2004	3	2004-03-23	1472	L	female	GA
CMDT	173	3	4	97	2004	3	2004-03-23	1472	L	female	GA
CMDT	194	13	7	77	2004	4	2004-04-08	1527	L	female	GA
CMDT	195	13	6	83	2004	4	2004-04-08	1527	L	female	GA
CMDT	196	13	1	84	2004	4	2004-04-08	1527	L	female	GA
CMDT	197	13	5	84	2004	4	2004-04-08	1527	L	female	GA
CMDT	198	13	4	85	2004	4	2004-04-08	1527	L	female	GA
CMDT	199	13	8	86	2004	4	2004-04-08	1527	L	female	GA
CMDT	200	13	9	89	2004	4	2004-04-08	1527	L	female	GA
CMDT	201	13	10	91	2004	4	2004-04-08	1527	L	female	GA
CMDT	202	13	2	95	2004	4	2004-04-08	1527	L	female	GA
CMDT	203	13	3	95	2004	4	2004-04-08	1527	L	female	GA
CMDT	56	25	7	80	2004	2	2004-02-11	1548	r	female	GA
CMDT	62	25	8	84	2004	2	2004-02-11	1548	r	female	GA
CMDT	66	25	4	87	2004	2	2004-02-11	1548	r	female	GA
CMDT	14	7	4	89	2004	2	2004-02-03	2026	L	female	AR
CMDT	15	7	6	80	2004	2	2004-02-03	2026	L	female	GA
CMDT	16	7	3	83	2004	2	2004-02-03	2026	L	female	GA
CMDT	18	7	2	85	2004	2	2004-02-03	2026	L	female	GA
CMDT	25	7	7	90	2004	2	2004-02-03	2026	L	female	GA
CMDT	26	7	8	92	2004	2	2004-02-03	2026	L	female	GA
CMDT	29	7	5	95	2004	2	2004-02-03	2026	L	female	GA
CMDT	30	7	10	98	2004	2	2004-02-03	2026	L	female	GA
CMDT	31	7	1	100	2004	2	2004-02-03	2026	L	female	GA
CMDT	32	7	9	100	2004	2	2004-02-03	2026	L	female	GA
CMDT	53	15	2	90	2004	2	2004-02-11	3021	L	female	AR
CMDT	57	15	3	83	2004	2	2004-02-11	3021	L	female	GA
CMDT	63	15	9	86	2004	2	2004-02-11	3021	L	female	GA
CMDT	64	15	7	87	2004	2	2004-02-11	3021	L	female	GA
CMDT	68	15	8	89	2004	2	2004-02-11	3021	L	female	GA
CMDT	69	15	10	89	2004	2	2004-02-11	3021	L	female	GA
CMDT	70	15	1	91	2004	2	2004-02-11	3021	L	female	GA
CMDT	72	15	5	92	2004	2	2004-02-11	3021	L	female	GA
CMDT	73	15	6	92	2004	2	2004-02-11	3021	L	female	GA
CMDT	77	15	4	99	2004	2	2004-02-11	3021	L	female	GA
CMDT	88	8	1	84	2004	2	2004-02-17	swarm	swarm	male	GA

## Sheet: spp results
1. Comparison species ID CMDT vs. DBL						2. Totals
	A. arabiensis	A. gambiae	A. merus	Total			2002		2003		2004		Total
CMDT	21	210	2	233		Species	N	%	N	%	N	%	N	%
%	9.01288	90.1288	0.858369	100		A. arabiensis	16	27.1186	35	23.3333	20	8.77193	71	16.2471
DBL	50	147	7	204		A. gambiae	43	72.8814	108	72	206	90.3509	357	81.6934
%	24.5098	72.0588	3.43137	100		A. merus	0	0	7	4.66667	2	0.877193	9	2.0595
						Total per year	59	100	150	100	228	100	437	100
X=23.92, df. 2; P<0.001
3. Species per month and year
	A. arabiensis	%	A. gambiae	%	A. merus	%	Total	%
Jan 02	4	30.7692	9	69.2308	0	0	13	100
Feb 02	1	25	3	75	0	0	4	100
Sep 02	1	33.3333	2	66.6667	0	0	3	100
Dec 02	10	25.641	29	74.359	0	0	39	100
Jan 03	9	40.9091	13	59.0909	0	0	22	100
Mar 03	20	18.1818	83	75.4545	7	6.36364	110	100
Apr 03	5	38.4615	8	61.5385	0	0	13	100
Dec 03	1	20	4	80	0	0	5	100
Feb 04	12	12	87	87	1	1	100	100
Mar 04	5	5.68182	82	93.1818	1	1.13636	88	100
Apr 04	3	7.5	37	92.5	0	0	40	100
Total	71	16.2471	357	81.6934	9	2.0595	437	100
4. Species per month (pooled years)
	A. arabiensis	%	A. gambiae	%	A. merus	%	Total	%
Jan	13	37.1429	22	62.8571	0	0	35	100
Feb	13	12.5	90	86.5385	1	0.961538	104	100
Mar	25	12.6263	165	83.3333	8	4.0404	198	100
Apr	8	15.0943	45	84.9057	0	0	53	100
Dec	11	25	33	75	0	0	44	100
Note: September out, only 3 specimens

## Sheet: spp month graphs
	A. arabiensis	A. gambiae	A. merus
Jan 02	30.7692	69.2308	0
Feb 02	25	75	0
Sep 02	33.3333	66.6667	0
Dec 02	25.641	74.359	0
Jan 03	40.9091	59.0909	0
Mar 03	18.1818	75.4545	6.36364
Apr 03	38.4615	61.5385	0
Dec 03	20	80	0
Feb 04	12	87	1
Mar 04	5.68182	93.1818	1.13636
Apr 04	7.5	92.5	0
Total	16.2471	81.6934	2.0595
Month	A. arabiensis	A. gambiae	A. merus
Jan 02	30.7692	69.2308	0
Jan 03	40.9091	59.0909	0
Feb 02	25	75	0
Feb 04	12	87	1
Mar 03	18.1818	75.4545	6.36364
Mar 04	5.68182	93.1818	1.13636
Apr 03	38.4615	61.5385	0
Apr 04	7.5	92.5	0
Sep 02	33.3333	66.6667	0
Dec 02	25.641	74.359	0
Dec 03	20	80	0
s.d.	11.956	11.5589
Mean arabiensis	23.4071	75.8202
	A. arabiensis	A. gambiae	A. merus
Dec	25	75	0
Jan	37.1429	62.8571	0
Feb	12.5	86.5385	0.961538
Mar	12.6263	83.3333	4.0404
Apr	15.0943	84.9057	0
Note: September out, only 3 specimens

## Sheet: sizes results
1. Overall sizes per species and year
		A. arabiensis			A. gambiae			A. merus
Year	N	Mean	S.D.	N	Mean	S.D.	N	Mean	S.D.
2002	16	87.5	4.76095	43	85.8605	5.23987	0	-	-
2003	33	88.8485	6.01623	107	85.0467	5.35774	6	95.1667	6.58534
2004	20	94.05	4.93617	201	88.8159	5.84645	2	86	5.65685
All years	69	90.0435	5.98143	351	87.3048	5.88615	8	92.875	7.31803
Species	Excel Cont.	Size	N	Prop	Total/sp
A. arabiensis	79 Contar	79	3	0.0434783
A. arabiensis	80 Contar	80	1	0.0144928
A. arabiensis	81 Contar	81	1	0.0144928
A. arabiensis	82 Contar	82	3	0.0434783
A. arabiensis	83 Contar	83	2	0.0289855
A. arabiensis	85 Contar	85	6	0.0869565
A. arabiensis	86 Contar	86	4	0.057971
A. arabiensis	87 Contar	87	2	0.0289855
A. arabiensis	88 Contar	88	6	0.0869565
A. arabiensis	89 Contar	89	3	0.0434783
A. arabiensis	90 Contar	90	12	0.173913
A. arabiensis	91 Contar	91	2	0.0289855
A. arabiensis	92 Contar	92	2	0.0289855
A. arabiensis	93 Contar	93	3	0.0434783
A. arabiensis	94 Contar	94	1	0.0144928
A. arabiensis	95 Contar	95	6	0.0869565
A. arabiensis	96 Contar	96	2	0.0289855
A. arabiensis	97 Contar	97	3	0.0434783
A. arabiensis	98 Contar	98	1	0.0144928
A. arabiensis	99 Contar	99	1	0.0144928
A. arabiensis	100 Contar	100	2	0.0289855
A. arabiensis	101 Contar	101	1	0.0144928
A. arabiensis	104 Contar	104	1	0.0144928
A. arabiensis	106 Contar	106	1	0.0144928	69
A. gambiae	71 Contar	71	1	0.00285714
A. gambiae	72 Contar	72	1	0.00285714
A. gambiae	73 Contar	73	1	0.00285714
A. gambiae	74 Contar	74	2	0.00571429
A. gambiae	75 Contar	75	1	0.00285714
A. gambiae	76 Contar	76	4	0.0114286
A. gambiae	77 Contar	77	4	0.0114286
A. gambiae	78 Contar	78	5	0.0142857
A. gambiae	79 Contar	79	8	0.0228571
A. gambiae	80 Contar	80	21	0.06
A. gambiae	81 Contar	81	8	0.0228571
A. gambiae	82 Contar	82	16	0.0457143
A. gambiae	83 Contar	83	14	0.04
A. gambiae	84 Contar	84	29	0.0828571
A. gambiae	85 Contar	85	16	0.0457143
A. gambiae	86 Contar	86	27	0.0771429
A. gambiae	87 Contar	87	28	0.08
A. gambiae	88 Contar	88	23	0.0657143
A. gambiae	89 Contar	89	21	0.06
A. gambiae	90 Contar	90	23	0.0657143
A. gambiae	91 Contar	91	21	0.06
A. gambiae	92 Contar	92	12	0.0342857
A. gambiae	93 Contar	93	16	0.0457143
A. gambiae	94 Contar	94	9	0.0257143
A. gambiae	95 Contar	95	12	0.0342857
A. gambiae	96 Contar	96	5	0.0142857
A. gambiae	97 Contar	97	5	0.0142857
A. gambiae	98 Contar	98	2	0.00571429
A. gambiae	99 Contar	99	7	0.02
A. gambiae	100 Contar	100	4	0.0114286
A. gambiae	101 Contar	101	1	0.00285714
A. gambiae	103 Contar	103	1	0.00285714
A. gambiae	107 Contar	107	1	0.00285714
A. gambiae	109 Contar	109	1	0.00285714	350
A. merus	82 Contar	82	1	0.111111
A. merus	84 Contar	84	1	0.111111
A. merus	89 Contar	89	1	0.111111
A. merus	90 Contar	90	1	0.111111
A. merus	91 Contar	91	1	0.111111
A. merus	97 Contar	97	2	0.222222
A. merus	101 Contar	101	2	0.222222	9

## Sheet: sizes graph
Size	A. gambiae	A. arabiensis	A. merus
71	0.00285714	0	0
72	0.00285714	0	0
73	0.00285714	0	0
74	0.00571429	0	0
75	0.00285714	0	0
76	0.0114286	0	0
77	0.0114286	0	0
78	0.0142857	0	0
79	0.0228571	0.0434783	0
80	0.06	0.0144928	0
81	0.0228571	0.0144928	0
82	0.0457143	0.0434783	0.111111
83	0.04	0.0289855	0
84	0.0828571	0	0.111111
85	0.0457143	0.0869565	0
86	0.0771429	0.057971	0
87	0.08	0.0289855	0
88	0.0657143	0.0869565	0
89	0.06	0.0434783	0.111111
90	0.0657143	0.173913	0.111111
91	0.06	0.0289855	0.111111
92	0.0342857	0.0289855	0
93	0.0457143	0.0434783	0
94	0.0257143	0.0144928	0
95	0.0342857	0.0869565	0
96	0.0142857	0.0289855	0
97	0.0142857	0.0434783	0.222222
98	0.00571429	0.0144928	0
99	0.02	0.0144928	0
100	0.0114286	0.0289855	0						Note: A. merus series not included
101	0.00285714	0.0144928	0.222222
103	0.00285714	0	0
104	0	0.0144928	0
106	0	0.0144928	0
107	0.00285714	0	0
109	0.00285714	0	0
