# Supplementary material for: Some like it hot: a differential response to changing temperatures by the malaria vectors Anopheles funestus and An. gambiae s.l
Source: PeerJ. 2017 Mar 28;5:e3099. doi: 10.7717/peerj.3099 (PMC5372839; doi:10.7717/peerj.3099)
Supplement: File S10 [file peerj-05-3099-s010.xlsx]

## Sheet: RAW data
number	Sheet	Day	Month	Year	House	Collection	nr copo	treatment	period/lado	start time	end time	Net type	Name	Af unfed	Af part	Af fed	Af semi	Af gravid	Af male	Ag unfed	ag part	Ag fed	ag semi	Ag gravid	Ag male	At female	At male	africana	uniformis	Ms female	africana2	Uniformis	Ms male	Cx female	Cx male	Sp A female	Sp A male	Marcado.f	colour	Marcado.M		Marcado Ag f	Marcado Ag m	culex fe	culex m	observacoes
9307	d	2	26	2007	3204	tent							cf	65	0	0	0	1	0	6	0	0	0	0	0	0				0			0	0	0	0		0		0		0
9403	i	2	28	2007	222	tent							cf	1	0	0	0	0	0	0	0	0	0	0	0	2				27			0	0	1	0
9577	t	3	28	2007	222	tent							cf	9	0	0	0	0	0	1	0	0	0	0	0	0				6			0	0	1	0
9598	u	3	26	2007	222	tent							cf	4	0	0	0	0	0	1	0	0	0	0	0	14				55			0	7	12	0
9628	v	3	25	2007	222	tent							eduardo	11	0	0	0	0	0	0	0	0	0	0	0	5				58			0	0	0	0
9565	s	2	24	2007	222	tent							cf	22	0	0	0	0	1	1	0	0	0	0	0	4				14			0	16	6	0
9627	v	3	24	2007	222	tent							eduardo	18	0	0	0	0	0	1	0	0	0	0	0	28				56			0	6	0	0
10095	a19	5	24	2007	222	tent							cf	12	0	0	0	0	0	0	0	0	0	0	0	0				1			0	0	0	0
9555	s	2	23	2007	222	tent							cf	3	0	0	0	0	0	1	0	0	0	0	0	8				12			6	10	0	0
9626	v	3	23	2007	222	tent							cf	2	0	0	0	0	0	0	0	0	0	0	0	0				22			0	0	6	0
9622	v	3	22	2007	222	tent							cf	2	0	0	0	0	0	0	0	0	0	0	0	0				5			0	0	0	0
10338	a31	5	22	2007	222	tent							cf	1	0	0	0	0	0	0	0	0	0	0	0	0				0			0	0	0	0
9615	v	3	21	2007	222	tent							cf	3	0	0	1	0	0	0	0	0	0	0	0	0				4			0	0	0	0
10396	a34	5	21	2007	222	tent							cf	22	0	0	0	0	0	0	0	0	0	0	0	6				91			0	2	0	0
9490	n	3	20	2007	222	tent							cf	5	0	0	0	0	0	1	0	0	0	0	0	2				11			0	0	0	0
9667	x	4	20	2007	222	tent							cf	17	0	0	0	0	0	4	0	0	0	0	0	7				86			0	4	2	0
9656	x	4	18	2007	222	tent							cf	17	0	0	0	0	0	1	0	0	0	0	0	16				65			6	30	3	0
9707	z	4	17	2007	222	tent							cf	21	0	0	0	0	0	3	0	0	0	0	0	72				31			0	4	0	0
9470	m	3	16	2007	222	tent							cf	1	0	0	0	0	0	0	0	0	0	0	0	0				3			0	0	0	0
10387	a34	5	16	2007	222	tent							cf	10	0	0	0	0	0	0	0	0	0	0	0	1				73			0	4	2	0
9464	m	3	15	2007	222	tent							cf	6	0	0	0	0	0	2	0	0	0	0	0	0				38			0	0	5	0
10262	a27	5	15	2007	222	tent							cf	16	0	0	0	0	1	1	0	0	0	0	0	1				62			0	2	0	0
9455	m	3	14	2007	222	tent							cf	2	0	0	0	0	1	0	0	0	0	0	0	0				32			0	0	0	0
10251	a27	5	14	2007	222	tent							cf	25	0	0	0	0	3	1	0	0	0	0	0	2				10			2	0	0	0
9442	k	3	13	2007	222	tent							cf	9	0	0	0	0	0	0	0	0	0	0	0	3				9			0	4	0	0
10244	a27	5	13	2007	222	tent							eduardo	14	0	0	0	0	0	0	0	0	0	0	0	0				8			0	0	0	0
9432	j	3	12	2007	222	tent							cf	3	0	0	0	0	0	2	0	0	0	0	0	1				40			0	0	0	0
10243	a26	5	12	2007	222	tent							eduardo	11	0	0	0	0	0	0	0	0	0	0	0	0				4			0	0	0	0
9511	p	2	11	2007	222	tent							cf	11	0	0	0	0	0	5	0	0	0	0	0	9				61			0	0	0	0
9647	w	4	11	2007	222	tent							cf	4	0	0	0	0	0	0	0	0	0	0	0	14				10			0	0	1	0
10245	a27	5	11	2007	222	tent							eduardo	18	0	0	0	0	0	0	0	0	0	0	0	2				6			0	0	1	0
9420	j	3	9	2007	222	tent							cf	17	0	0	0	0	0	1	0	0	0	0	0	0				136			0	1	13	0
9687	y	4	9	2007	222	tent							cf	7	0	0	0	0	0	0	0	0	0	0	0	27				12			0	0	2	0
9271	b	3	8	2007	222	tent							cf	12	0	0	0	0	0	1	0	0	0	0	0	2				55			0	5	0	0		0		0		0
10201	a24	5	8	2007	222	tent							cf	28	0	1	0	0	0	0	0	0	0	0	0	0				50			2	0	0	0
10196	a24	5	7	2007	222	tent							cf	33	0	0	0	0	0	1	0	0	0	0	0	2				12			0	3	0	0
9362	g	3	6	2007	222	tent							cf	1	0	0	0	0	0	0	0	0	0	0	0	2				17			0	3	0	0
9382	h	3	5	2007	222	tent							cf	2	0	0	0	0	0	0	0	0	0	0	0	3				30			2	0	0	0
9673	y	4	5	2007	222	tent							eduardo	16	0	0	0	0	0	2	0	0	0	0	0	17				68			0	4	0	0
10085	a19	23	5	2007	222	tent							cf	4	0	0	0	0	13	0	0	0	0	0	0	0				1			0	1	0	1
9249	a	25	4	2007	222	tent							cf	18	0	0	0	0	1	0	0	0	0	0	0	12				13			2	0	0	0		0		0		0
9260	a	26	4	2007	222	tent							cf	25	0	0	0	0	0	3	0	0	0	0	0	17				140			13	2	0	0		0		0		0
9381	h	3	4	2007	222	tent							eduardo	37	0	0	0	1	0	0	0	0	0	0	0	1				71			0	3	0	0
9725	o	4	4	2007	222	tent							cf	12	0	0	0	0	0	2	0	0	0	0	0	26				69			0	0	0	0
9666	x	19	4	2007	222	tent							cf	20	0	0	0	0	0	0	0	0	0	0	0	12				31			0	3	0	0
10210	a25	30	4	2007	222	tent							cf	28	0	0	0	3	5	1	0	0	0	0	0	0				0			0	0	0	0
10185	a24	5	3	2007	222	tent							cf	7	0	1	0	0	0	1	0	0	0	0	0	5				30			0	4	0	0
9479	n	19	3	2007	222	tent							cf	25	0	0	1	0	0	0	0	0	0	0	0	1				13			0	0	4	0
9604	u	27	3	2007	222	tent							cf	16	0	0	0	0	0	0	0	0	0	0	0	0				23			0	3	0	0
9587	t	30	3	2007	222	tent							eduardo	1	0	0	0	0	0	0	0	0	0	0	0	0				0			0	2	0	0
9278	c	27	2	2007	222	tent							cf	10	0	4	0	0	0	2	0	0	0	0	0	7				85			0	6	0	0		0		0		0
9592	t	4	2	2007	222	tent							cf	0	0	0	0	0	0	0	0	0	0	0	0	1				3			0	8	0	1
10211	a25	5	2	2007	222	tent							cf	11	0	0	0	0	0	1	0	0	0	0	0	3				22			0	6	0	0
9380	h	3	1	2007	222	tent							cf	20	0	0	0	0	0	0	0	0	0	0	0	2				65			0	0	0	0
9588	t	4	1	2007	222	tent							eduardo	0	0	0	0	0	0	0	0	0	0	0	0	0				0			0	2	3	0
9929	a11	12	15	2006	222	tent							dc	1	0	0	0	0	0	7	0	0	0	0	0	5				60			0	1	0	0
9324	e	2	21	2007	24	tent							cf	4	0	0	0	0	0	0	0	0	0	0	0	0				5			0	0	0	0		0		0		0
10392	a34	5	17	2007	22	tent							cf	18	0	0	0	0	0	0	0	0	0	0	0	4				7			0	1	1	0
12894		4	5	2004	t5	exit							ar	2	0	0	0	4	46	1	0	0	0	0	5	0	0	0	0	0	0	0	0	4	6		0	0
12936		11	5	2004	t5	exit							ne	3	0	0	0	7	19	0	0	0	0	5	2	0	0	0	0	0	0	0	0	0	3		0	0
12490		15	1	2004	t5	exit							q	7	0	0	0	0	106	1	0	0	0	0	0	0	0	0	0	0	0	0	0	0	1		0	0		0
12092		12	5	2003	t5	exit		0					ne	3	0	0	0	2	54	0	1	0	0	0	9	0	0	0	0	0	0	0	0	4	3		0	0		0
12123		15	5	2003	t5	exit		1					q	0	0	0	0	4	47	0	1	0	0	1	2	0	0	0	0	0	0	0	0	0	0		0	0		0
		30	9	2003	t4	exit		0					n	5	0	0	0	9	47	0	0	0	0	0	0	0	0	0	0	1	0	0	0	2	1		0	0
6283	427	24	10	2005	soza	exit			0				cristovao	4	0	0	0	18	56	2	0	0	0	3	6	0		0	0	0	0	0	0	5	11	0	0	0		0		0
		29	3	2003	sergio	exit		0					q	2	0	0	0	0	49	0	0	0	0	0	0	0	0	0	0	0	0	0	0	0	0		0	0
11835		11	8	2003	serg	exit		0					n	0	0	0	20	0	11	1	0	1	0	0	0	0	0	0	0	0	0	0	0	0	0		0	0		0
11834		11	8	2003	serg	exit		0					q	3	19	14	17	10	8	0	0	0	0	0	0	0	0	0	0	0	0	0	0	0	0		0	0		0
11863		12	8	2003	serg	exit		0					n	0	0	0	34	19	23	0	0	0	4	0	0	0	0	0	0	0	0	0	0	0	0		0	0		0
11832		12	8	2003	serg	exit		0					q	5	0	0	13	9	19	0	0	0	0	0	0	0	0	0	0	0	0	0	0	0	0		0	0		0
11860		14	8	2003	serg	exit		0					q	19	7	12	2	9	32	0	0	0	0	0	3	0	0	0	0	0	0	0	0	0	0		0	0		0
6409	433	7	6	2005	rungo	exit			0				antonio	4	0	0	0	13	51	0	0	0	0	0	1	0		0	0	0	0	0	0	4	3	0	0	0		0		0
6313	428	9	6	2005	rungo	exit			0				antonio	9	0	0	0	9	33	0	0	0	0	6	11	0		0	0	0	0	0	0	2	4	0	0	0		0		0
6371	431	20	6	2005	rungo	exit			0				antonio	4	0	0	0	6	47	1	0	0	0	0	1	0		0	0	0	0	0	0	1	3	0	0	0		0		0
5210	373	3	5	2005	rungo	exit			0				ermelinda	5	0	0	0	6	32	1	0	0	0	3	7	0		0	0	0	0	0	0	0	2	0	0	0		0		0
5081	368	14	4	2005	rungo	exit			0				pedro	6	0	0	0	16	1	0	0	0	0	5	10	0		0	0	0	0	0	0	1	2	0	0	0		1?		0	0	0
5136	371	27	4	2005	rungo	exit			0				antonio	5	0	0	0	1	48	3	0	0	0	7	23	0		0	0	0	0	0	0	0	0	0	0	0		1	yellow	0	0	0
5058	367	11	4	2005	rungo	exit			0				pedro	6	0	0	0	11	31	5	0	0	0	5	13	0		0	0	0	0	0	0	1	0	0	0	0		0		0
5074	368	13	4	2005	rungo	exit			0				pedro	9	0	0	0	15	9	0	0	0	0	9	19	0		0	0	0	0	0	0	1	0	0	0	0		0		0
4986	363	25	4	2005	rungo	exit			0				antonio	6	0	0	0	2	51	1	0	0	0	2	8	0		0	0	0	0	0	0	0	0	1aeds	0	0		0		0
5115	370	26	4	2005	rungo	exit			0				antonio	5	0	0	0	3	31	3	0	0	0	2	14	0		0	0	0	0	0	0	2	1	0	0	0		0		0
5334	379	28	4	2005	rungo	exit			0				antonio	6	0	0	0	13	53	1	0	0	0	5	14	0		0	0	0	0	0	0	2	1	0	0	0		0		0
9641	w	4	11	2007	rosca	exit							fatima	2	0	0	0	2	66	0	0	0	0	0	0	0				0			0	1	2	0
7774	490	15	4	2006	ricardo	exit			0				ricardo	24	0	0	0	21	177	0	0	0	0	0	5	0		0	0	0	0	0	0	7	1	2aedes	0	0		0		0
		2	10	2003	ricardo	exit		0					n	23	0	0	0	0	63	0	0	0	0	0	0	0	0	0	0	2	0	0	0	1	0		0	0
10691	a49	11	30	2006	ric	exit							imo	2	0	0	0	2	6	0	0	0	0	0	0	0				0			0	0	1	0
2947	260	12	8	2004	raimo	exit		0	0	0	00:00:00		antonio	7	0	0	0	13	32	1	0	0	0	3	0	0	0	0	0	0	0	0	0	0	0	0	0	0		0		0	0	0
12223		2	9	2003	rafael	exit			2				ne	0	0	0	0	0	0	0	0	0	0	0	0	0	0	0	0	0	0	0	0	0	0		0	0		0
12220		2	9	2003	rafael	exit							ne	1	0	0	0	5	19	0	0	0	0	0	0	0	0	0	0	0	0	0	0	1	0		0	0		0
12218		3	9	2003	rafael	exit							q	1	0	0	0	0	15	0	0	0	0	0	0	0	0	0	0	0	0	0	0	0	0		0	0		0
12217		5	9	2003	rafael	exit							ne	9	0	0	0	0	1	0	0	0	0	0	0	0	0	0	0	0	0	0	0	1	0		1	0		0
		1	9	2003	rafael	exit		2					q	3	0	0	2	0	12	0	0	0	0	0	0	0	0	0	0	0	0	0	0	1	0		0	0
7122	466	7	12	2005	pf222	exit			0				dc	0	0	0	0	0	0	1	0	0	0	0	5	0		0	0	0	0	0	0	2	0	0	0	0		0		0
		1	7	2003	pedro	exit		0					n	2	0	0	0	1	17	0	0	0	0	0	1	0	0	0	0	0	0	0	0	3	3		0	0
		2	7	2003	pedro	exit		0					q	1	0	0	0	0	7	0	0	0	0	0	0	0	0	0	0	0	0	0	0	4	0		0	0
		3	7	2003	pedro	exit		1					n	0	0	1	0	0	6	0	0	0	0	0	0	0	0	0	0	0	0	0	0	8	4		0	0
6489	437	17	5	2005	palmira	exit			0				pedro	8	0	0	0	0	41	0	0	0	0	0	0	1		0	0	0	0	0	0	0	0	0	0	0				0				1 aedes
5031	366	12	4	2005	palmira	exit			0				eduardo	2	0	0	0	8	15	13	0	0	0	8	18	0		0	0	0	0	0	0	1	0	0	0	0		0		0
5078	368	13	4	2005	palmira	exit			0				eduardo	4	0	0	0	5	6	0	0	0	0	3	29	0		0	0	0	0	0	0	2	1	0	0	0		0		0
5083	368	14	4	2005	palmira	exit			0				eduardo	2	0	0	0	4	2	0	0	0	0	2	26	0		0	0	0	0	0	0	2	2	0	0	0		0		0
10264	a28	6	6	2007	novo	exit							bacar	0	0	0	0	8	20	0	0	0	0	0	0	0				0			0	0	1	0
10295	a29	6	5	2007	novo	exit						w	bacar	6	0	0	0	12	118	0	0	0	0	0	0	0				0			0	1	0	0
10283	a29	6	4	2007	novo	exit						w	bacar	16	0	0	0	11	162	0	0	0	0	0	0	0				0			0	1	0	0
5360	381	23	8	2005	nova220	exit			0				nelson	10	0	0	0	5	80	0	0	0	0	0	3	0		0	0	0	0	0	0	0	0	0	0	0		0		0
5369	381	24	8	2005	nova220	exit			0				nelson	10	0	0	0	5	80	3	0	0	0	0	0	0		0	0	0	0	0	0	0	0	0	0	0		0		0
5376	381	25	8	2005	nova220	exit			0				nelson	14	0	0	0	8	91	0	0	0	0	0	2	0		0	0	0	0	0	0	0	0	0	0	0		0		0
6866	456	13	4	2006	nova002	exit			0				ivete	2	0	0	0	0	40	0	0	0	0	0	2	0	0	0	0	0	0	0	0	0	0	0	0	0						?????!!!!!!!!!!
9604	585	17	12	2007	nova casa 06	exit			0				np	7	0	0	0	3	63	0	0	0	0	0	0	0		0	0	0	0	0	0	2	1	0	0	0		0		0
9247	567	5	7	2007	nova casa	exit			0				eduardo	2	0	0	0	2	170	0	0	0	0	0	0	0		0	0	0	0	0	0	0	0	0	0	0		0		0
9251	567	6	7	2007	nova casa	exit			0				eduardo	6	0	0	0	1	73	0	0	0	0	0	0	0		0	0	0	0	0	0	0	2	0	0	0		0		0
9343	572	8	6	2007	nova casa	exit			0				bacar	5	0	0	0	0	24	0	0	0	0	0	0	0		0	0	0	0	0	0	0	0	0	0	0		0		0
9427	576	12	6	2007	nova casa	exit			0				bacar	15	0	0	0	7	55	0	0	0	0	0	0	0		0	0	0	0	0	0	0	0	0	0	0		0		0
9397	575	13	6	2007	nova casa	exit			0				bacar	17	0	0	0	3	48	0	0	0	0	0	0	0		0	0	0	0	0	0	1	0	0	0	0		0		0
9351	572	20	6	2007	nova casa	exit			0				bacar	6	0	0	0	29	120	0	0	0	0	0	0	0		0	0	0	0	0	0	0	0	1aedes	0	0		0		0
9355	573	27	6	2007	nova casa	exit			0				bacar	7	0	0	0	9	76	0	0	0	0	0	0	0		0	0	0	0	0	0	1	0	0	0	0		0		0
8621	533	1	9	2006	nova 922	exit			0				adelia	6	0	0	0	2	20	0	0	0	0	0	0	0		0	0	0	0	0	0	0	0	0	0	0		0		0
8631	534	4	9	2006	nova 922	exit			0				adelia	4	0	0	0	13	56	0	0	0	0	0	0	0		0	0	0	0	0	0	0	0	0	0	0		0		0
8643	534	5	9	2006	nova 922	exit			0				adelia	2	0	0	0	2	18	0	0	0	0	0	0	0		0	0	0	0	0	0	1	0	0	0	0		0		0
8672	536	7	9	2006	nova 922	exit			0				adelia	5	0	0	0	14	49	0	0	0	0	0	0	0		0	0	0	0	0	0	0	0	0	0	0		0		0
8491	527	14	8	2006	nova 922	exit			0				adelia	0	0	0	0	4	20	0	0	0	0	0	0	0		0	0	0	0	0	0	0	0	0	0	0		0		0
8510	528	21	8	2006	nova 922	exit			0				adelia	3	0	0	0	6	45	0	0	0	0	0	0	0		0	0	0	0	0	0	0	0	0	0	0		0		0
8524	529	22	8	2006	nova 922	exit			0				adelia	4	0	0	0	4	48	1	0	0	0	0	0	0		0	0	0	0	0	0	0	0	1aedes	0	0		0		0
8538	529	23	8	2006	nova 922	exit			0				adelia	6	0	0	0	22	56	0	0	0	0	0	0	0		0	0	0	0	0	0	0	0	0	0	0		0		0
8559	530	24	8	2006	nova 922	exit			0				adelia	5	0	0	0	22	52	0	0	0	0	0	0	0		0	0	0	0	0	0	1	0	0	0	0		0		0
8577	531	29	8	2006	nova 922	exit			0				adelia	4	0	0	0	9	51	0	0	0	0	0	0	0		0	0	0	0	0	0	0	1	1aedes	0	0		0		0
8601	532	31	8	2006	nova 922	exit			0				adelia	2	0	0	0	2	35	0	0	0	0	0	0	0		0	0	0	0	0	0	0	0	0	0	0		0		0
8293	517	3	7	2006	nova 3156	exit			0				halima	7	0	0	0	0	17	0	0	0	0	0	0	0		0	0	0	0	0	0	10	1	0	0	0		0		0
8120	507	30	6	2006	nova 3156	exit			0				halima	6	0	0	0	4	23	0	0	0	0	0	0	0		0	0	0	0	0	0	0	0	0	0	0		0		0
6903	458	11	4	2006	nova 23	exit			0				eduardo	7	0	0	0	9	71	0	0	0	0	0	1	0	0	0	0	0	0	1	0	4aedes	0	0	0	0
8412	523	25	5	2006	nova 219	exit			0				np	16	0	0	0	6	121	1	0	0	0	0	0	0		0	0	0	0	0	0	2	0	0	0	0		0		0
8078	505	31	5	2006	nova 219	exit			0				halima	10	0	0	0	5	58	1	0	0	0	0	1	0		0	0	0	0	0	0	0	0	0	0	0		0		0
8490	527	14	8	2006	nova 1323	exit			0				antonio	6	0	0	0	1	33	0	0	0	0	0	0	0		0	0	0	0	0	0	0	0	0	0	0		0		0
8164	510	6	7	2006	nova 0083	exit			0				cristovao	5	0	0	0	2	8	0	0	0	0	0	0	0		0	0	0	0	0	0	1	0	0	0	0		0		0
9020	555	29	10	2007	nova 006	exit			0				np	11	0	0	0	2	128	0	0	0	0	0	0	0		0	0	0	0	0	0	7	1	0	0	0		0		0
7754	489	17	4	2006	nova 002	exit			0				ivete	4	0	0	0	5	43	0	0	0	0	0	3	0		0	0	0	0	0	0	0	1	0	0	1	green	0		0
7742	488	12	4	2006	nova 002	exit			0				ivete	1	0	0	0	8	25	0	0	0	0	0	2	0		0	0	0	0	0	0	1	0	0	0	0		0		0
7773	490	15	4	2006	nova 002	exit			0				ivete	0	0	0	0	4	19	0	0	0	0	0	0	0		0	0	0	0	0	0	0	0	0	0	0		0		0
7777	490	16	4	2006	nova 002	exit			0				ivete	14	0	0	0	0	30	0	0	0	0	0	1	0		0	0	0	0	0	0	0	0	1aedes	0	0		0		0				??????!!!
7873	495	19	4	2006	nova 002	exit			0				ivete	0	0	0	0	0	6	0	0	0	0	0	0	0		0	0	0	0	0	0	1	0	0	0	0		0		0
7907	497	20	4	2006	nova 002	exit			0				eduardo	3	0	0	0	3	3	0	0	0	0	0	1	0		0	0	0	0	0	0	1	0	0	0	0		0		0
7921	497	21	4	2006	nova 002	exit			0				ivete	1	0	0	0	2	12	0	0	0	0	0	0	0		0	0	0	0	0	0	0	0	0	0	0		0		0
7931	498	22	4	2006	nova 002	exit			0				ivete	3	0	0	0	0	20	0	0	0	0	0	0	0		0	0	0	0	0	0	0	1	0	0	0		0		0
7940	498	23	4	2006	nova 002	exit			0				ivete	2	0	0	0	0	26	0	0	0	0	0	2	0		0	0	0	0	0	0	0	0	0	0	0		0		0
7956	499	24	4	2006	nova 002	exit			0				ivete	1	0	0	0	0	10	0	0	0	0	1	0	0		0	0	0	0	0	0	0	0	1aedes	0	0		0		0
	694	5	1	2009	new	exit								3	0	0	0	0	9	0	0	0	0	0	0	0	0	0	0	0	0	0	0	4	5	0	0
	695	16	1	2009	new	exit								0	0	0	0	1	12	0	0	0	0	0	0	0	0	0	0	0	0	0	0	0	0	0	0
	696	23	1	2009	new	exit								0	0	0	0	1	10	0	0	0	0	0	0	0	0	0	1	0	0	0	0	0	0	0	0
	693	11	12	2008	new	exit								6	0	0	0	0	37	0	0	0	0	0	0	0	0	0	0	0	0	0	0	0	0	0	0
	693	15	12	2008	new	exit								4	0	0	0	3	74	0	0	0	0	0	0	0	0	0	0	0	0	0	0	0	0	0	0
	693	16	12	2008	new	exit								3	0	0	0	6	61	0	0	0	0	0	0	0	0	0	0	0	0	0	0	0	0	0	0
	694	22	12	2008	new	exit								4	0	0	0	2	96	0	0	0	0	0	0	0	0	0	0	0	0	0	0	0	0	0	0
9731	o	4	5	2007	new	exit							eduardo	5	0	0	0	1	140	0	0	0	0	0	0	0				0			0	0	1	0
6559	441	25	1	2006	nc6	exit			0				cristovao	26	0	0	0	5	142	4	0	0	0	0	12	0		0	0	0	0	0	0	9	8	0	0	0		0		0
6284	427	24	10	2005	n.c83	exit			0				nelson	5	0	0	0	5	109	1	0	0	0	0	5	0		0	0	0	0	0	0	1	0	0	0	0		0		0
		23	4	2003	mazive	exit		0					q	3	0	0	0	33	101	1	1	0	2	6	16	0	0	0	0	0	0	0	0	0	0		0	0
		24	4	2003	mazive	exit		0					n	0	0	0	0	51	4	0	0	3	0	12	1	0	0	0	0	0	0	0	0	0	0		0	0
5287	377	9	5	2005	mateus?	exit			0				mateus	4	0	0	0	0	18	1	0	0	0	0	3	0		0	0	0	0	0	0	0	0	0	0	0		0		0
9197	565	15	8	2007	mariamo	exit			0				eduardo	47	0	0	0	6	171	0	0	0	0	0	0	0		0	0	0	0	0	0	0	1	0	0	0		0		0
3363	276	18	10	2004	manuel	exit		0	0	0	00:00:00		nelson	4	0	0	0	5	11	2	0	0	0	2	3	0	0	0	0	0	0	0	0	0	1	0	0	0		0		0	0	0
3076	265	16	9	2004	manuel	exit		0	0	0	00:00:00		nelson	9	0	0	0	18	118	0	0	0	0	1	4	0	0	0	0	0	0	0	0	0	2	0	0	0		0		0	0	0
2669	247	30	9	2004	manuel	exit		0	0	0	00:00:00		nelson	2	0	0	3	17	28	0	0	0	0	0	0	0	0	0	0	0	0	0	0	2	2	0	0	0		0		0	0	0
10395	a34	5	21	2007	magudo	exit						branco	eduardo	8	0	0	0	31	190	0	0	0	0	0	0	1				0			0	1	0	0
10003	a14	12	7	2006	magda	exit							eduardo	4	0	0	0	8	28	0	0	0	0	1	0	0				0			0	1	0	0
		14	7	2003	luisa	exit		1					q	0	0	0	0	0	12	0	0	0	0	0	0	0	0	0	0	0	0	0	0	0	1		0	0
		15	7	2003	luisa	exit		4					n	1	0	0	0	0	16	0	0	0	0	0	0	0	0	0	0	0	0	0	0	0	0		0	0
6351	430	16	6	2005	luís	exit			0				antonio	0	0	0	0	42	29	0	0	0	0	2	4	0		0	0	0	0	0	0	0	0	0	0	0		0		0
2961	260	18	8	2004	luis	exit		0	0	0	00:00:00		antonio	0	0	0	0	29	17	0	0	0	0	0	4	0	0	0	0	0	0	0	0	0	0	0	0	0		0		0	0	0
9846	a6	12	4	2006	lucia	exit							eduardo	0	0	0	0	15	23	0	0	0	0	0	0	0				0			0	0	0	0
		9	10	2003	lina	exit		0					q	2	0	0	0	7	49	0	0	0	0	0	0	3	0	0	0	0	0	0	0	0	0		0	0
		23	9	2003	lina	exit		0					n	12	0	0	0	0	84	0	0	0	0	0	0	0	0	0	0	0	0	0	0	0	0		0	0
		16	6	2003	lina	exit		0					q	1	0	11	2	5	5	0	0	0	0	0	0	0	0	0	0	0	0	0	0	1	0		0	0
		16	6	2003	lina	exit		0					q	7	0	0	0	0	9	0	0	0	0	0	0	0	0	0	0	0	0	0	0	0	0		0	0
		17	6	2003	lina	exit		0					n	19	5	0	0	14	62	0	0	0	0	0	0	0	0	0	0	0	0	0	0	0	0		0	0
		18	6	2003	lina	exit		0					q	0	0	0	0	0	38	0	0	0	0	0	0	0	0	0	0	0	0	0	0	0	0		0	0
		19	6	2003	lina	exit		1					n	12	3	5	0	2	63	0	0	0	0	0	2	0	0	0	0	0	0	0	0	0	0		0	0
8511	528	21	8	2006	l235	exit			0				ricardo	10	0	0	0	24	124	0	0	0	0	0	0	0		0	0	0	0	0	0	0	0	0	0	0		0		0
10276	a28	6	7	2007	julino	exit							alima	13	0	0	0	10	77	0	0	0	0	0	0	0				0			0	1	0	1
		7	7	2003	julia	exit		0					n	6	0	6	0	0	7	0	0	0	0	0	3	0	0	0	0	0	0	0	0	0	0		0	0
		7	7	2003	julia	exit		0					q	0	0	3	0	1	1	0	0	0	0	0	0	0	0	0	0	0	0	0	0	0	0		0	0
		9	7	2003	julia	exit		1					n	18	0	0	0	7	8	0	0	0	0	0	0	0	0	0	0	0	0	0	0	0	0		1	0
		10	7	2003	julia	exit		1					q	0	10	1	0	0	7	0	0	0	0	0	0	0	0	0	0	0	0	0	0	0	0		0	0
12931		12	5	2004	jose	exit							ar	2	0	0	0	0	119	0	0	0	0	0	18	0	0	0	0	0	0	0	0	1	0		0	0
12904		28	4	2004	jose	exit							ne	4	0	0	0	0	53	0	0	0	0	3	38	0	0	0	0	0	0	0	0	1	0		0	0
12694		11	3	2004	jose	exit							ne	9	0	0	0	3	221	3	0	0	0	11	27	0	0	0	0	0	0	0	0	1	0		0	0		0
12688		15	3	2004	jose	exit							q	5	0	0	0	4	72	3	0	0	0	1	45	0	0	0	0	0	0	0	0	0	0		0	0		0
		1	10	2003	jose	exit		0					n	49	0	4	0	0	24	1	0	0	0	0	0	0	0	0	0	0	0	0	0	0	0		0	0
12224		2	9	2003	jose	exit			1				q	2	0	0	0	0	0	0	0	0	0	0	0	0	0	0	0	0	0	0	0	0	0		0	0		0
12222		2	9	2003	jose	exit			2				q	12	0	0	2	5	14	0	0	0	0	0	0	0	0	0	0	0	0	0	0	0	0		0	0		0
12221		2	9	2003	jose	exit							q	1	0	0	0	0	1	0	0	0	0	0	0	0	0	0	0	0	0	0	0	0	0		0	0		0
12219		3	9	2003	jose	exit							ne	2	0	0	19	6	11	0	0	0	0	0	0	0	0	0	0	0	0	0	0	0	0		0	0		0
		1	9	2003	jose	exit		1					n	3	1	0	9	29	17	0	0	0	0	0	0	0	0	0	0	0	0	0	0	0	0		0	0
		4	9	2003	jose	exit		2					q	8	5	2	0	21	29	0	3	0	0	0	0	0	0	0	0	0	0	0	0	0	0		0	0
3241	272	4	11	2003	jorge	exit		0	0	0	00:00:00		nelson	12	0	0	0	2	48	2	0	1	0	0	0	0	0	0	0	0	0	0	0	2	0	0	0	0		0		0	0	0
9883	a8	11	3	2006	joquina	exit							jacinto	6	0	0	0	108	182	0	0	0	0	0	0	0				0			0	4	1	0
10688	a49	11	30	2006	joaquina	exit							jacinto	4	0	0	0	77	27	1	0	0	0	1	1	0				0			0	0	0	0
10614	a45	29	11	2006	joaquina	exit							jacinto	7	0	0	0	78	63	0	0	0	0	0	0	0				0			0	1	0	0
10164	a22	11	28	2006	joaquina	exit							jacinto	4	0	0	0	40	104	0	0	0	0	0	2	0				0			0	2	0	0
10148	a22	11	24	2006	joaquina	exit							eduardo	10	0	0	0	50	36	0	0	0	0	0	0	0				0			0	0	0	0
10139	a21	23	11	2006	joaquina	exit							eduardo	6	0	0	0	58	96	1	0	0	0	0	1	0				0			0	0	0	0
10001	a14	12	7	2006	joaquina	exit							jacinto	2	0	1	0	73	83	0	0	0	0	0	2	0				0			0	3	0	0
9992	a14	12	6	2006	joaquina	exit							eduardo	2	0	0	0	8	50	1	0	0	0	0	1	0				0			0	0	0	0
		27	10	2003	joaquina	exit		0					n	8	4	1	0	33	68	0	0	2	0	7	2	0	0	0	0	0	0	0	0	0	0		0	0
		26	9	2003	joaquina	exit		0					q	2	0	0	0	7	43	0	0	0	0	0	0	0	0	0	0	0	0	0	0	0	1		0	0
11974		18	8	2003	joanna	exit		0					n	9	2	0	14	7	29	0	0	0	2	0	3	0	0	0	0	0	0	0	0	0	0		0	0		0
11973		19	8	2003	joanna	exit		0	1				q	2	0	0	0	0	3	0	0	0	0	0	0	0	0	0	0	0	0	0	0	0	0		0	0		0
11970		19	8	2003	joanna	exit		1					q	7	9	0	0	0	43	0	0	0	0	0	1	0	0	0	0	0	0	0	0	0	0		0	0		0
11971		20	8	2003	joanna	exit		1					n	11	1	2	4	6	56	3	1	0	0	0	3	0	0	0	0	0	0	0	0	0	0		0	0		0
11968		21	8	2003	joanna	exit		1					q	3	0	0	2	2	15	0	0	0	0	0	0	0	0	0	0	0	0	0	0	0	0		0	0		0
		26	9	2003	joana	exit		0					n	6	0	0	0	11	27	0	0	0	0	0	0	0	0	0	0	0	0	0	0	0	0		0	0
4725	349	14	12	2004	jarro r	exit			0				dc	2	0	0	0	0	4	29	0	0	0	0	20	0		0	0	0	0	0	0	4	1	0	0	0		0		0
4255	323	4	2	2005	jacinto	exit			0				nelson	3	0	0	0	1	19	2	0	0	0	0	17	0		0	0	0	0	0	0	12	2	0	0	0		0		0
2788	253	7	10	2004	jacinto	exit		0	0	0	00:00:00		nelson	4	0	0	0	1	10	0	0	0	0	0	3	0	0	0	0	0	0	0	0	0	0	0	0	0		0		0	0	0
12588		19	2	2004	jacinto	exit							ne	3	1	2	0	33	45	21	1	8	0	62	111	0	0	0	0	0	0	0	0	0	0		0	0		0
12515		26	1	2004	jacinto	exit							ne	52	0	0	0	5	11	43	0	0	0	0	36	0	0	0	0	0	0	0	0	0	0		0	0		0
10306	a30	5	31	2007	imo	exit							eduardo	31	0	20	0	2	60	0	0	0	0	0	0	1				0			0	3	2	0
10353	a32	5	30	2007	imo	exit						branco	eduardo	11	0	0	0	2	23	0	0	0	0	0	0	0				0			0	0	1	0
9394	i	2	28	2007	imo	exit							fatima	4	0	0	0	7	20	0	0	0	0	0	0	0				0			0	0	0	0
10369	a33	5	28	2007	imo	exit						branco	eduardo	23	0	0	0	7	67	0	0	0	0	0	0	0				1			0	0	1	0
10580	a43	1	25	2007	imo	exit						branco	fatima	1	0	0	0	0	12	0	0	0	0	0	0	0				0			0	0	0	0
10099	a19	5	24	2007	imo	exit							eduardo	26	0	0	0	4	91	0	0	0	0	0	0	0				0			0	4	0	0
10328	a31	5	22	2007	imo	exit							eduardo	1	0	1	3	0	19	0	0	0	0	0	0	0				0			0	2	2	0
9710	z	4	18	2007	imo	exit						white	fatima	0	0	0	0	1	3	0	0	0	0	0	0	0				0			0	0	0	0
9702	z	4	17	2007	imo	exit							fatima	4	0	1	0	2	25	0	0	0	0	0	0	0				0			0	1	4	0
9467	m	3	16	2007	imo	exit						white	fatima	2	0	0	0	3	30	0	0	0	0	0	1	0				0			0	0	0	0
10385	a34	5	16	2007	imo	exit							eduardo	2	0	1	0	1	60	0	0	0	0	0	0	0				0			0	0	1	1aedes
10731	a52	1	15	2007	imo	exit							ricardina	0	0	0	0	2	251	0	0	0	0	0	0	0				0			0	0	0	0
10257	a27	5	15	2007	imo	exit							eduardo	16	0	1	0	1	128	0	0	0	0	0	0	0				0			0	5	6	0
10405	a35	1	12	2007	imo	exit							ricardina	13	0	0	0	0	50	0	0	0	0	0	4	0				0			0	0	1	0
9534	r	2	12	2007	imo	exit						white	fatima	1	0	0	0	1	12	0	0	0	0	0	1	0				0			0	0	0	0
10437	a36	1	11	2007	imo	exit							ricardina	4	0	0	0	0	21	0	0	0	0	0	0	0				0			0	2	0	0
10426	a36	1	10	2007	imo	exit							ricardina	2	0	0	0	2	24	0	0	0	0	0	0	0				0			0	0	0	0
10238	a26	5	10	2007	imo	exit							fatima	29	0	0	0	0	162	0	0	0	0	0	0	0				0			0	0	3	0
10447	a37	1	9	2007	imo	exit							ricardina	3	0	0	0	0	24	0	0	0	0	0	2	0				0			0	1	0	0
10233	a26	5	9	2007	imo	exit							fatima	38	0	0	0	0	59	0	0	0	0	0	0	0				0			0	1	1	0
9267	b	3	8	2007	imo	exit							fatima	4	0	0	0	4	38	0	0	0	0	0	1	0				1			0	0	0	0		0		0		0
9205	565	16	8	2007	imo	exit			0				eduardo	18	0	0	0	4	84	0	0	0	0	0	0	0		0	0	0	0	0	0	1	0	0	0	0		0		0
9219	566	20	8	2007	imo	exit			0				eduardo	19	0	0	0	1	17	0	0	0	0	0	0	0		0	0	0	0	0	0	4	3	0	0	0		0		0
9226	566	21	8	2007	imo	exit			0				imo	2	0	0	0	2	84	0	0	0	0	0	0	0		0	0	1	0	0	0	3	0	0	0	0		0		0
9444	577	23	8	2007	imo	exit			0				eduardo	3	0	0	0	1	87	0	0	0	0	0	0	0		0	0	0	0	0	0	1	1	0	0	0		0		0
10477	a38	1	8	2007	imo	exit							ricardina	15	0	1	0	0	30	0	0	0	0	0	0	0				0			0	0	0	0
9248	567	5	7	2007	imo	exit			0				bacar	1	1	0	0	1	98	0	0	0	0	0	0	0		0	0	0	0	0	0	0	0	0	0	0		0		0
9253	567	6	7	2007	imo	exit			0				bacar	13	0	0	0	2	42	0	0	0	0	0	0	1		0	0	0	0	0	0	0	1	0	0	0		0		0
9274	568	6	7	2007	imo	exit			0				eduardo	8	0	0	0	0	154	0	0	0	0	0	0	0		0	0	0	0	0	0	1	0	0	0	0		0		0
9699	590	9	7	2007	imo	exit			0				bacar	16	0	0	0	0	96	0	0	0	0	0	0	0		0	0	0	0	0	0	0	2	0	0	0		0		0
9706	590	10	7	2007	imo	exit			0				eduardo	27	0	0	0	4	49	0	0	0	0	0	0	0		0	0	0	0	0	0	0	0	0	0	0		0		0
9712	590	12	7	2007	imo	exit			0				bacar	24	0	0	0	2	97	0	0	0	0	0	0	0		0	0	0	0	0	0	0	0	0	0	0		0		0
9384	574	16	7	2007	imo	exit			0				eduardo	43	0	0	0	8	178	0	0	0	0	0	0	0		0	0	0	0	0	0	0	1	0	0	0		0		0
8713	538	22	7	2007	imo	exit			0				eduardo	42	0	0	2	6	209	0	0	0	0	0	0	0		0	0	0	0	0	0	2	2	0	0	0		0		0
8721	538	23	7	2007	imo	exit			0				eduardo	59	1	0	0	9	161	0	0	0	0	0	0	0		0	0	0	0	0	0	1	0	0	0	0		0		0
9303	570	24	7	2007	imo	exit			0				eduardo	19	0	0	0	2	72	0	0	0	0	0	0	0		0	0	0	0	0	0	2	1	0	0	0		0		0
9305	570	25	7	2007	imo	exit			0				eduardo	13	0	0	0	0	27	0	0	0	0	0	0	0		0	0	0	0	0	0	1	2	0	0	0		0		0
9312	570	26	7	2007	imo	exit			0				eduardo	11	0	0	0	3	141	0	0	0	0	0	0	0		0	0	0	0	0	0	0	0	0	0	0		0		0
9259	568	27	7	2007	imo	exit			0				eduardo	2	0	0	0	13	134	0	0	0	0	0	0	0		0	0	0	0	0	0	0	1	0	0	0		0		0
9367	g	3	7	2007	imo	exit						white	fatima	2	0	0	0	3	57	0	0	0	0	0	0	0				0			0	1	0	0
9342	572	8	6	2007	imo	exit			0				eduardo	56	0	0	0	7	64	0	0	0	0	0	0	0		0	0	0	0	0	0	3	0	0	0	0		0		0
9420	576	11	6	2007	imo	exit			0				eduardo	36	4	0	0	2	106	0	0	0	0	0	0	0		0	0	0	0	0	0	7	1	0	0	0		0		0
9429	576	12	6	2007	imo	exit			0				eduardo	21	0	0	0	0	70	0	0	0	0	0	0	0		0	0	0	0	0	0	0	2	0	0	0		0		0
9392	h	3	6	2007	imo	exit							fatima	0	0	0	0	5	12	0	0	0	0	0	0	0				0			0	0	0	0
10266	a28	6	6	2007	imo	exit							eduardo	14	0	0	0	3	97	0	0	0	0	0	0	0				0			0	3	0	0
10291	a29	6	5	2007	imo	exit						w	eduardo	23	0	0	0	2	161	0	0	0	0	0	0	0				0			1	5	3	1
10086	a19	23	5	2007	imo	exit							eduardo	8	0	0	0	4	49	0	0	0	0	0	0	0				0			0	0	0	0
11151	662	13	4	2007	imo	exit			0				fatima	7	0	0	0	2	56	0	0	0	0	0	0	0		0	0	0	0	0	0	5	1	0	0	0		0		0
11169	662	16	4	2007	imo	exit			0				fatima	4	0	0	0	0	32	0	0	0	0	1	0	0		0	0	2	0	0	2	0	0	0	0	0		0		0
10287	a29	6	4	2007	imo	exit						w	eduardo	77	0	5	0	9	182	0	0	0	0	0	0	0				0			0	5	3	0
10342	a32	29	3	2007	imo	exit						branco	eduardo	30	0	2	0	6	49	0	0	0	0	0	0	0				0			0	1	2	0
10596	a44	2	2	2007	imo	exit						branco	fatima	1	0	0	0	0	54	0	0	0	0	0	1	0				0			0	0	0	0
9412	i	3	2	2007	imo	exit							fatima	10	0	0	0	14	62	0	0	0	0	0	0	0				1			0	0	2	0
10214	a25	5	2	2007	imo	exit						w	fatima	5	0	0	0	1	7	0	0	0	0	0	0	0				0			0	3	2	0
9378	h	3	1	2007	imo	exit						white	fatima	10	0	0	0	0	65	1	0	0	0	0	1	0				0			0	0	0	0
10309	a30	6	1	2007	imo	exit							eduardo	18	0	0	0	6	37	0	0	0	0	0	0	0				1			0	6	3	0
10601	a45	11	28	2006	imo	exit							ricardina	1	0	0	0	1	60	0	0	0	0	0	0	0				0			0	2	0	0
10703	a50	12	21	2006	imo	exit							ricardina	7	0	0	0	4	62	0	0	0	0	0	0	0				0			0	0	0	0
10175	a23	12	20	2006	imo	exit							ricardina	4	0	0	0	0	38	0	0	0	0	1	3	0				0			0	0	0	0
9928	a11	12	15	2006	imo	exit							ricardina	1	0	0	0	2	18	1	0	0	0	0	0	0				0			0	0	0	0
9956	a12	12	14	2006	imo	exit							ricardina	1	0	0	0	0	8	0	0	0	0	0	0	0				0			0	0	0	0
9978	a13	12	13	2006	imo	exit							ricardina	1	0	0	0	3	33	0	0	0	0	0	8	0				0			0	0	0	0
9969	a13	12	12	2006	imo	exit							ricardina	3	0	0	0	6	45	2	0	0	0	0	1	0				0			0	0	0	0
9901	a9	19	12	2006	imo	exit							ricardina	5	0	0	0	2	28	0	0	0	0	0	10	0				0			0	0	3	0
10615	a45	29	11	2006	imo	exit							ricardina	2	0	0	0	10	53	0	0	0	0	0	0	0				0			0	1	0	0
10628	a46	12	5	2006	imo	exit							ricardina	1	0	0	0	2	9	0	0	0	0	0	0	0				0			0	0	0	0
10622	a46	12	4	2006	imo	exit							ricardina	2	0	0	0	2	33	0	0	0	0	0	0	0				0			0	0	0	0
9832	a6	12	1	2006	imo	exit							ricardina	1	0	0	0	0	7	0	0	0	0	0	0	0				0			0	1	0	0
9358	573	28	6	2007	hortencia	exit			0				eduardo	1	0	0	0	1	8	0	0	0	0	0	0	0		0	0	0	0	0	0	2	0	0	0	0		0		0
9650	w	4	12	2007	hino	exit							fatima	2	0	0	0	4	14	0	0	0	0	0	0	0				0			0	1	1	0
12518		21	1	2004	gostavo	exit							ar	11	0	0	0	0	36	10	0	0	0	0	6	2	0	0	0	13	0	0	2	0	3		0	0		0
3240	272	4	11	2003	gostavo	exit		0	0	0	00:00:00		nelson	9	0	0	1	1	50	1	0	0	0	0	0	0	0	0	0	0	0	0	0	0	0	0	0	0		0		0	0	0
4179	319	14	3	2005	gildo	exit			0				nelson	1	0	0	0	9	27	3	1	0	0	6	11	0		0	0	0	0	0	0	1	0	0	0	0		0		0
3319	275	2	8	2004	gildo	exit		0	0	0	00:00:00		nelson	5	0	0	0	20	102	0	0	0	0	0	0	0	0	0	0	0	0	0	0	4	2	0	0	0		0		0	0	0
12435		16	12	2003	gildo	exit							ne	30	0	0	0	2	72	13	0	0	0	0	1	0	0	0	0	0	0	0	0	0	0		0	0		0
		7	10	2003	gildo	exit		0					q	1	0	0	0	20	53	0	0	0	0	2	1	0	0	0	0	0	0	0	0	0	0		0	0
		9	10	2003	gildo	exit		0					n	12	0	6	0	0	44	2	0	0	0	0	0	0	0	0	0	0	0	0	0	0	0		0	0
		30	9	2003	gildo	exit		0					q	2	0	0	0	4	38	0	0	0	0	0	1	0	0	0	0	0	0	0	0	0	0		0	0
6189	422	20	10	2005	gabriel	exit			0				mateus	3	0	0	0	22	9	0	0	0	0	0	0	0		0	0	0	0	0	0	0	0	0	0	0		0		0
		2	10	2003	fernando	exit		0					q	8	0	0	0	0	24	0	0	0	0	0	0	0	0	0	0	2	0	0	0	0	0		0	0
		14	4	2003	fernando	exit		0					q	29	0	0	7	18	48	7	0	0	2	1	19	0	0	0	0	0	0	0	0	0	0		0	0
		17	4	2003	fernando	exit		0					n	2	0	0	5	0	29	2	2	1	0	1	29	0	0	0	0	0	0	0	0	0	0		0	0
		6	10	2003	ermelinda	exit		0					q	1	0	0	0	2	25	0	0	0	0	1	0	0	0	0	0	0	0	0	0	0	0		0	0
		27	8	2003	ermelinda	exit		1					n	18	0	0	4	3	32	0	0	0	0	0	0	0	0	0	0	0	0	0	0	0	0	0	0	1		0		0	0	0
7077	464	13	12	2005	domingos	exit			0				mateus	2	0	0	0	0	87	8	0	0	0	0	85	0		0	0	1	0	0	0	11	7	0	0	0		0		0
6986	460	16	11	2005	domingos	exit			0				danilo	0	0	0	0	16	17	1	0	0	0	0	17	0		0	0	0	0	0	0	8	0	0	0	0		0		0
6950	458	21	11	2005	domingos	exit			0				danilo	0	0	0	0	5	14	1	0	0	0	4	10	0		0	0	0	0	0	0	3	7	0	0	0		0		0
7177	469	24	11	2005	domingos	exit			0				mateus	2	0	0	0	8	19	2	0	0	0	2	11	0		0	0	0	0	0	0	10	16	0	0	0		0		0
		6	10	2003	dianora	exit		0					n	5	1	0	0	3	7	0	0	0	0	0	1	0	0	0	0	0	0	0	0	0	0		0	0
11967		21	8	2003	dianna	exit		0					n	5	0	0	0	4	13	0	0	0	0	0	0	0	0	0	0	0	0	0	0	0	0	0	0	1		0		0	0	0
11859		18	8	2003	dianna	exit		0					q	7	0	0	0	0	13	0	0	0	0	0	0	0	0	0	0	0	0	0	0	0	0		0	0		0
11969		19	8	2003	dianna	exit		0					n	8	0	0	0	0	32	0	0	0	0	0	1	0	0	0	0	0	0	0	0	0	0		0	0		0
11972		20	8	2003	dianna	exit		0					q	0	0	0	0	0	24	1	0	0	0	0	0	0	0	0	0	0	0	0	0	0	0		0	0		0
12105		12	5	2003	delfina	exit		0					q	32	0	10	0	11	356	9	0	0	0	0	0	0	0	0	1	0	0	0	0	0	0		0	0		0
12104		15	5	2003	delfina	exit		1					ne	8	0	0	0	0	119	0	0	0	0	0	5	0	0	0	0	0	0	0	0	0	0		0	0		0
13005		31	5	2004	decc	exit							ne	1	0	0	0	0	14	0	0	0	0	0	0	0	0	0	0	0	0	0	0	0	0		0	0
10400	a34	5	21	2007	danilo??	exit							danilo	1	0	0	0	21	91	0	0	0	0	0	0	0				0			0	0	0	0
6557	441	25	1	2006	ct5	exit			0				nelson	18	0	0	0	3	66	0	0	0	0	1	7	0		0	0	0	0	0	0	2	1	0	0	0		0		0
2699	249	27	10	2004	ct5	exit		0	0	0	00:00:00		nelson	24	0	0	0	26	308	0	0	0	0	0	0	0	0	1	0	0	0	0	0	0	6	0	0	0		0		0	0	0
2998	262	23	9	2004	CT5	exit		0	0	0	00:00:00		nelson	8	0	0	0	6	24	0	0	0	0	0	0	0	0	0	0	0	0	0	0	0	0	0	0	0		0		0	0	0
2954	260	16	8	2004	CT5	exit		0	0	0	00:00:00		nelson	1	0	0	0	4	51	0	0	0	0	0	3	0	0	0	0	0	0	0	0	1	0	0	0	0		0		0	0	0
3110	266	22	7	2004	ct5	exit		0	0	0	00:00:00		nelson	3	0	0	1	4	9	0	0	0	0	0	0	0	0	0	0	0	0	0	0	0	0	0	0	0		0		0	0	0
3052	264	9	6	2004	CT5	exit		0	0	0	00:00:00		nelson	3	0	0	0	3	48	1	0	0	0	0	0	0	0	0	0	2	0	0	0	0	0	0	0	0		0		0	0	0
	694	5	1	2009	ct4	exit								2	0	0	0	3	26	1	0	0	0	0	0	0	0	0	0	0	0	0	0	0	1	0	0
	695	16	1	2009	ct4	exit								0	0	0	0	0	6	0	0	0	0	0	0	0	0	0	0	0	0	0	0	0	0	0	0
	696	23	1	2009	ct4	exit								0	0	0	0	1	4	0	0	0	0	0	0	0	0	0	0	0	0	0	0	0	0	0	0
	693	12	12	2008	ct4	exit								0	0	0	0	0	50	0	0	0	0	0	0	0	0	1	0	0	0	0	0	2	0	0	0
	693	16	12	2008	ct4	exit								9	0	0	0	1	84	0	0	0	0	1	0	0	0	0	0	0	0	0	0	2	1	0	0
	694	22	12	2008	ct4	exit								3	0	0	0	0	44	0	0	0	0	0	0	0	0	0	0	0	0	0	0	0	0	0	0
11452	677	3	11	2008	ct4	exit							tina	11	0	0	0	10	177	0	0	0	0	0	0	0		0	0	0	0	0	0	1	0	0	0	0		0		0
11459	677	4	11	2008	ct4	exit							tina	3	0	0	0	10	146	0	0	0	0	0	0	0		0	0	0	0	0	0	1	0	0	0	0		0		0
11467	677	5	11	2008	ct4	exit							tina	6	0	0	0	3	60	0	0	0	0	0	0	0		0	0	0	0	0	0	0	0	0	0	0		0		0
11419	675	6	11	2008	ct4	exit							tina	5	0	0	0	15	90	0	0	0	0	0	0	0		0	0	0	0	0	0	0	1	0	0	0		0		0
11427	675	7	11	2008	ct4	exit							tina	7	0	0	0	2	128	0	0	0	0	0	0	0		1male	0	0	0	0	0	0	0	0	0	0		0		0
11731	691	10	11	2008	ct4	exit							tina	12	0	0	0	8	150	0	0	0	0	0	0	0		0	0	0	0	1	0	1	1	0	0	0		0		0
11741	691	11	11	2008	ct4	exit							tina	13	0	0	0	20	133	0	0	0	0	0	0	0		0	0	0	0	0	0	0	0	0	0	0		0		0
11712	690	12	11	2008	ct4	exit							tina	6	0	0	0	14	76	0	0	0	0	0	0	0		0	0	0	1	0	0	2	0	0	0	0		0		0
11723	690	13	11	2008	ct4	exit							tina	6	0	0	0	1	108	0	0	0	0	0	0	0		0	0	0	0	0	0	0	0	0	0	0		0		0
11726	690	14	11	2008	ct4	exit							tina	2	0	0	0	0	28	0	0	0	0	0	0	0		0	0	0	0	0	0	0	0	0	0	0		0		0
11695	689	17	11	2008	ct4	exit							tina	4	0	0	0	20	43	0	0	0	0	0	0	0		0	0	0	0	0	0	0	1	0	0	0		0		0
11702	689	18	11	2008	ct4	exit							tina	1	0	0	0	16	46	0	0	0	0	0	1	0		0	0	0	0	0	0	0	0	0	0	0		0		0
11572	682	1	10	2008	ct4	exit							tina	16	0	0	0	0	98	0	0	0	0	0	0	0		0	0	0	0	0	0	0	0	0	0	0		0		0
11598	684	2	10	2008	ct4	exit							tina	33	0	0	0	2	106	0	0	0	0	0	1	0		0	0	0	0	0	0	1	0	0	0	0		0		0
11603	684	3	10	2008	ct4	exit							tina	10	0	0	0	2	74	0	0	0	0	0	0	0		0	0	0	0	0	0	0	0	0	0	0		0		0
11615	685	6	10	2008	ct4	exit							tina	12	0	0	0	2	99	0	0	0	0	0	0	0		0	0	0	0	0	0	0	0	0	0	0		0		0
11621	685	7	10	2008	ct4	exit							tina	13	0	0	0	2	91	0	0	0	0	0	1	0		0	0	0	0	0	0	0	0	0	0	0		0		0
11629	685	8	10	2008	ct4	exit							tina	14	0	0	0	2	93	0	0	0	0	0	0	0		0	0	0	0	0	0	3	0	0	0	0		0		0
11521	680	9	10	2008	ct4	exit							tina	12	0	0	0	8	84	0	0	0	0	0	0	0		0	0	0	0	0	0	0	0	0	0	0		0		0
11528	680	10	10	2008	ct4	exit							tina	8	0	0	0	5	30	0	0	0	0	0	0	0		0	0	0	0	0	0	0	0	0	0	0		0		0
11500	679	13	10	2008	ct4	exit							tina	10	0	0	0	0	74	0	0	0	0	0	0	0		0	0	1	0	0	0	0	1	0	0	0		0		0
11510	679	14	10	2008	ct4	exit							tina	0	0	0	0	0	0	0	0	0	0	0	0	0		0	0	0	0	0	0	0	0	0	0	0		0		0
11634	686	15	10	2008	ct4	exit							tina	40	0	0	0	16	146	0	0	0	0	0	0	0		0	0	0	0	0	0	0	0	0	0	0		0		0
11648	686	20	10	2008	ct4	exit							tina	1	0	0	0	3	162	0	0	0	0	0	0	0		0	0	0	0	0	0	0	0	0	0	0		0		0
11655	687	21	10	2008	ct4	exit							tina	7	0	0	0	15	60	0	0	0	0	0	0	0		0	0	0	0	0	0	0	0	0	0	0		0		0
11667	687	22	10	2008	ct4	exit							tina	8	0	0	0	7	146	0	0	0	0	0	0	0		0	0	0	0	0	0	1	0	0	0	0		0		0
11674	688	24	10	2008	ct4	exit							tina	0	0	0	0	0	8	0	0	0	0	0	0	0		0	0	0	0	0	0	0	0	0	0	0		0		0
9007	555	25	10	2008	ct4	exit			0				antonio	14	0	0	0	10	370	0	0	0	0	0	0	0		0	0	0	0	0	0	0	0	0	0	0		0		0
11681	688	27	10	2008	ct4	exit							tina	8	2	1	0	14	136	0	0	0	0	0	0	0		0	0	0	0	0	0	1	0	0	0	0		0		0
11436	676	28	10	2008	ct4	exit							tina	6	0	0	0	12	143	0	0	0	0	0	0	1		0	0	0	0	0	0	1	1	0	0	0		0		0
11480	678	31	10	2008	ct4	exit							tina	7	0	0	0	4	90	0	0	0	0	0	0	0		0	0	0	0	0	0	0	0	0	0	0		0		0
11277	668	2	9	2008	ct4	exit							tina	35	0	0	0	0	88	0	0	1	0	0	0	0		0	0	0	0	0	0	0	0	0	0	0		0		0
11283	668	3	9	2008	ct4	exit							tina	9	0	0	0	5	117	0	0	0	0	0	0	0		0	0	0	0	0	0	1	1	0	0	0		0		0
11258	667	4	9	2008	ct4	exit							tina	20	1	0	0	2	75	0	0	0	0	0	0	0		0	0	0	0	0	0	0	0	0	0	0		0		0
11270	667	5	9	2008	ct4	exit							tina	12	0	0	0	4	118	0	0	0	0	0	0	0		0	0	0	0	0	0	0	0	0	0	0		0		0
11213	665	9	9	2008	ct4	exit			0				tina	4	0	0	0	9	101	0	0	0	0	0	0	0		0	0	0	0	0	0	1	0	0	0	0		0		0
11224	665	12	9	2008	ct4	exit			0				tina	15	0	0	0	1	120	0	0	0	0	0	0	0		0	0	0	0	0	0	0	1	0	0	0		0		0
11195	664	15	9	2008	ct4	exit			0				tina	8	0	0	0	3	70	0	0	0	0	0	0	0		0	0	0	0	0	0	1	0	0	0	0		0		0
11200	664	16	9	2008	ct4	exit			0				tina	2	0	0	0	1	48	0	0	0	0	0	0	0		0	0	0	0	0	0	3	1	0	0	0		0		0
11210	664	17	9	2008	ct4	exit			0				tina	6	0	0	0	4	56	0	0	0	0	0	0	0		0	0	0	0	0	0	0	2	0	0	0		0		0
11579	683	18	9	2008	ct4	exit							tina	9	0	0	0	8	89	0	0	0	0	0	0	0		0	0	0	0	0	0	0	0	0	0	0		0		0
11585	683	19	9	2008	ct4	exit							tina	6	0	0	0	2	68	0	0	0	0	0	0	0		0	0	0	0	0	0	2	2	0	0	0		0		0
11531	681	22	9	2008	ct4	exit							tina	10	0	0	0	1	18	0	0	0	0	0	0	0		0	0	0	0	0	0	1	1	0	0	0		0		0
11536	681	23	9	2008	ct4	exit							tina	30	0	0	0	10	103	0	0	0	0	0	0	0		0	0	0	0	0	0	3	0	0	0	0		0		0
11539	681	24	9	2008	ct4	exit							tina	5	0	0	0	8	55	0	0	0	0	0	0	0		0	0	0	0	0	0	0	0	0	0	0		0		0
11553	682	29	9	2008	ct4	exit							tina	19	0	0	0	3	112	0	0	0	0	0	0	0		0	0	0	0	0	0	2	0	0	0	0		0		0
11561	682	30	9	2008	ct4	exit							tina	20	0	0	0	0	104	0	0	0	0	0	0	0		0	0	0	0	0	0	0	0	0	0	0		0		0
10026	606	1	8	2008	ct4	exit			0				tina	7	0	0	0	7	66	0	0	0	0	0	0	0		0	0	0	0	0	0	0	1	0	0	0		0		0
9977	604	4	8	2008	ct4	exit			0				tina	14	0	0	0	3	87	0	0	0	0	0	0	0		0	0	0	0	0	0	0	0	0	0	0		0		0
9993	604	5	8	2008	ct4	exit			0				tina	21	0	0	0	2	22	0	0	0	0	0	0	0		0	0	0	0	0	0	2	0	0	0	0		0		0
9962	603	6	8	2008	ct4	exit			0				tina	16	0	0	0	1	77	0	0	0	0	0	0	0		0	0	0	0	0	0	0	0	0	0	0		0		0
9937	602	7	8	2008	ct4	exit			0				tina	20	0	0	1	2	112	0	0	0	0	0	0	0		0	0	0	0	0	0	0	0	0	0	0		0		0
9945	602	8	8	2008	ct4	exit			0				tina	7	0	0	0	2	86	0	0	0	0	0	0	0		0	0	0	0	0	0	1	1	0	0	0		0		0
9954	602	11	8	2008	ct4	exit			0				tina	12	0	0	0	2	154	0	0	0	0	0	0	0		0	0	0	0	0	0	0	0	0	0	0		0		0
9785	594	13	8	2008	ct4	exit			0				tina	21	0	0	0	1	93	1	0	0	0	0	2	0		0	0	0	0	0	0	2	0	0	0	0		0		0
9790	594	14	8	2008	ct4	exit			0				tina	20	1	0	0	5	44	0	0	0	0	0	0	0		0	0	0	0	0	0	1	0	0	0	0		0		0
11299	669	15	8	2008	ct4	exit							tina	14	0	0	0	4	100	0	0	0	0	0	0	0		0	0	0	0	0	0	0	1	0	0	0		0		0
11353	672	18	8	2008	ct4	exit							tina	20	0	0	0	3	78	0	0	0	0	0	0	0		0	0	0	0	0	0	1	0	0	0	0		0		0
11361	672	19	8	2008	ct4	exit							tina	38	0	0	0	3	173	0	0	0	0	0	0	0		0	0	0	0	0	0	0	0	0	0	0		0		0
11375	673	20	8	2008	ct4	exit							tina	25	0	0	0	3	176	0	0	0	0	0	0	1		0	0	1	0	0	0	1	3	0	0	0		0		0
11390	673	21	8	2008	ct4	exit							tina	13	0	0	0	3	78	0	0	0	0	0	0	0		0	0	0	0	0	0	0	0	0	0	0		0		0
11340	671	22	8	2008	ct4	exit							tina	14	0	0	0	0	36	0	0	0	0	0	0	0		0	0	0	0	0	0	0	0	0	0	0		0		0
11327	670	26	8	2008	ct4	exit							tina	2	0	0	0	5	96	0	0	0	0	0	0	0		0	0	0	0	0	0	0	0	0	0	0		0		0
11234	666	27	8	2008	ct4	exit							tina	4	0	0	0	2	140	0	0	0	0	0	0	0		0	0	0	0	0	0	0	0	0	0	0		0		0
11250	666	28	8	2008	ct4	exit							tina	16	0	0	0	1	178	0	0	0	0	0	0	0		0	0	0	0	0	0	1	0	0	0	0		0		0
11399	674	29	8	2008	ct4	exit							tina	11	0	0	0	3	190	0	0	0	0	0	0	0		0	0	0	0	0	0	0	0	0	0	0		0		0
11032	656	16	7	2008	ct4	exit			0				tina	1	0	0	0	10	92	0	0	0	0	0	0	0		0	0	0	0	0	0	0	0	0	0	0		0		0
11050	657	18	7	2008	ct4	exit			0				tina	11	0	0	0	0	162	0	0	0	0	0	0	0		0	0	0	0	0	0	0	0	0	0	0		0		0
11049	656	21	7	2008	ct4	exit			0				tina	21	0	0	0	3	106	0	0	0	0	0	0	0		0	0	0	0	0	0	0	2	0	0	0		0		0
11065	657	22	7	2008	ct4	exit			0				tina	14	0	0	0	7	93	0	0	0	0	0	0	0		0	0	0	0	0	0	0	0	0	0	0		0		0
10118	611	23	7	2008	ct4	exit			0				tina	4	0	0	0	0	1	0	0	0	0	0	0	0		0	0	0	0	0	0	0	0	0	0	0		0		0
10124	611	24	7	2008	ct4	exit			0				tina	22	0	0	0	5	97	0	0	0	0	0	0	0		0	0	0	0	0	0	2	0	0	0	0		0		0
10136	612	25	7	2008	ct4	exit			0				tina	13	0	0	0	6	97	0	0	0	0	0	0	0		0	0	0	0	0	0	0	0	0	0	0		0		0
10143	612	28	7	2008	ct4	exit			0				tina	17	0	0	0	4	156	0	0	0	0	0	0	0		0	0	0	0	0	0	2	1	0	0	0		0		0
10153	612	29	7	2008	ct4	exit			0				tina	7	0	0	0	3	106	0	0	0	0	0	0	0		0	0	0	0	0	0	0	0	0	0	0		0		0
11097	659	30	7	2008	ct4	exit			0				tina	10	1	0	0	3	45	0	0	0	0	0	0	0		0	0	0	0	0	0	0	0	0	0	0		0		0
11106	659	31	7	2008	ct4	exit			0				isabel	5	0	0	0	1	20	0	0	0	0	0	0	0		0	0	0	0	0	0	0	0	0	0	0		0		0
10185	614	10	3	2008	ct4	exit			0				fatima	1	0	0	0	7	0	0	0	0	0	0	0	0		0	0	6	0	0	0	2	0	0	0	0		0		0
10768	642	11	3	2008	ct4	exit			0				fatima	8	0	0	0	4	20	0	0	0	0	0	0	0		0	0	0	0	0	0	0	0	0	0	0		0		0
10782	643	12	3	2008	ct4	exit			0				fatima	13	0	0	0	0	14	0	0	0	0	0	0	0		0	0	0	0	0	0	0	0	0	0	0		0		0
11138	661	25	2	2008	ct4	exit			0				fatima	6	0	0	0	21	34	0	0	0	0	0	0	0		0	0	0	0	0	0	0	0	0	0	0		0		0
10757	642	26	2	2008	ct4	exit			0				fatima	7	0	0	0	15	50	0	0	0	0	0	2	0		0	0	0	0	0	0	0	0	0	0	0		0		0
9800	595	10	1	2008	ct4	exit		0	porta				alima	3	0	0	0	8	27	0	0	0	0	0	0	0		0	0	0	0	0	0	7	10	0	0	0		0		0
9799	595	10	1	2008	ct4	exit		0	b				np	5	0	0	0	2	16	0	0	0	0	0	1	0		0	0	0	0	0	0	1	3	0	0	0		0		0
9798	595	10	1	2008	ct4	exit		0	a				ricardina	1	0	0	1	4	8	0	0	0	0	0	1	0		0	0	0	0	0	0	3	3	0	0	0		0		0
9802	595	14	1	2008	ct4	exit		0	porta				alima	0	0	0	0	3	5	0	0	0	0	0	0	0		0	0	0	0	0	0	1	4	0	0	0		0		0
9803	595	14	1	2008	ct4	exit		0	b				benilde	0	0	0	0	1	2	0	0	0	0	0	0	0		0	0	0	0	0	0	1	2	0	0	0		0		0
9801	595	14	1	2008	ct4	exit		0	a				np	2	0	0	0	1	0	0	0	0	0	0	0	0		0	0	0	0	0	0	1	2	0	0	0		0		0
9811	595	15	1	2008	ct4	exit		0	b				alima	1	0	0	0	0	1	0	0	0	0	0	0	0		0	0	0	0	0	0	3	3	0	0	0		0		0
9812	595	15	1	2008	ct4	exit		0	a				benilde	0	0	0	0	0	2	0	0	0	0	0	0	0		0	0	1	0	0	0	0	1	0	0	0		0		0
9810	595	15	1	2008	ct4	exit		0	porta				ricardina	0	0	0	0	0	3	0	0	0	0	0	0	0		0	0	0	0	0	0	1	5	0	0	0		0		0
9823	596	18	1	2008	ct4	exit			0				rute	6	0	0	0	10	19	0	0	0	0	0	0	0		0	0	0	0	0	0	5	6	0	0	0		0		0
10368	a33	5	28	2007	ct4	exit						branco	np	25	0	4	0	0	71	0	0	0	0	0	0	0				0			0	0	1	0
10575	a43	1	25	2007	ct4	exit							danilo	28	0	0	0	2	85	0	0	0	0	1	7	0				0			0	5	12	0
9567	s	2	25	2007	ct4	exit						white	np	5	0	0	0	19	84	0	0	0	0	0	0	0				0			0	3	7	0
10091	a19	5	24	2007	ct4	exit							np	14	0	0	0	2	73	0	0	0	0	0	0	0				0			0	1	2	0
10527	a41	1	22	2007	ct4	exit							danilo	19	0	0	0	2	164	2	0	0	0	0	12	0				0			0	0	0	0
10335	a31	5	22	2007	ct4	exit						branco	np	24	0	2	1	0	86	0	0	0	0	0	0	0				0			0	0	0	0
10394	a34	5	21	2007	ct4	exit						branco	np	21	0	0	0	2	156	1	0	0	0	0	0	0				0			0	0	0	0
10549	a42	1	18	2007	ct4	exit							danilo	13	0	0	0	1	125	0	0	0	0	0	9	0				0			0	11	15	0
10381	a34	5	16	2007	ct4	exit						branco	np	21	0	0	0	7	159	0	0	0	0	0	1	0				0			0	2	3	0
10254	a27	5	15	2007	ct4	exit							np	31	1	0	0	11	302	0	0	0	0	0	0	0				0			0	2	4	0
10246	a27	5	14	2007	ct4	exit							np	48	0	0	0	1	161	0	0	0	0	0	0	1				0			0	2	1	0
8945	552	8	10	2007	ct4	exit			0				antonio	29	1	0	0	16	144	0	0	0	0	0	0	0		0	0	0	0	0	0	3	5	0	0	0		0		0
8953	552	9	10	2007	ct4	exit			0				antonio	12	0	0	0	15	128	0	0	0	0	0	0	0		0	0	0	0	0	0	1	1	0	0	0		0		0
9022	555	29	10	2007	ct4	exit			0				antonio	21	0	0	0	4	277	0	0	0	0	0	0	0		0	0	0	0	0	0	0	5	0	0	0		0		0
10242	a26	5	10	2007	ct4	exit							np	21	0	0	0	4	103	0	0	0	0	0	0	0				0			0	2	6	0
8805	545	3	9	2007	ct4	exit			0				np	17	0	0	0	6	243	0	0	0	0	0	0	0		0	0	0	0	0	0	7	4	0	0	0		0		0
8817	545	4	9	2007	ct4	exit			0				np	30	0	0	0	7	326	0	0	0	0	0	0	0		0	0	0	0	0	0	0	0	0	0	0		0		0
8800	544	5	9	2007	ct4	exit			0				np	13	0	0	0	3	103	0	0	0	0	0	0	0		0	0	0	0	0	0	0	0	0	0	0		0		0
8886	549	27	9	2007	ct4	exit			0				np	11	0	0	0	4	261	0	0	0	0	0	0	0		0	0	0	0	0	0	1	3	0	0	0		0		0
9283	569	7	8	2007	ct4	exit			0				np	28	0	0	0	2	211	0	0	0	0	0	0	0		0	0	0	0	0	0	0	1	0	0	0		0		0
9232	566	22	8	2007	ct4	exit			0				np	31	1	0	0	2	166	0	0	0	0	0	0	0		0	0	1	0	0	0	0	4	0	0	0		0		0
9440	577	23	8	2007	ct4	exit			0				np	30	0	0	0	6	107	0	0	0	0	0	0	1		0	0	0	0	0	0	5	1	0	0	0		0		0
8861	547	30	8	2007	ct4	exit			0				np	14	0	0	0	8	104	0	0	0	0	0	0	0		0	0	1	0	0	0	2	4	0	0	0		0		0
10198	a24	5	8	2007	ct4	exit						w	np	44	0	1	0	10	168	0	0	0	0	0	0	0				0			0	6	14	0
8715	538	20	7	2007	ct4	exit			0				np	19	0	0	0	3	127	0	0	0	0	0	0	0		0	0	0	0	0	0	0	0	0	0	0		0		0
9268	568	30	7	2007	ct4	exit			0				np	19	0	0	0	4	114	0	0	0	0	0	0	0		0	0	0	0	0	0	0	3	0	0	0		0		0
10187	a24	5	7	2007	ct4	exit						w	np	59	0	1	0	6	112	0	0	0	0	0	0	0				0			0	0	7	0
9348	f	2	6	2007	ct4	exit						sem	danilo	38	0	0	0	2	184	0	0	0	0	0	5	0				0			0	2	3	0
10340	a31	23	5	2007	ct4	exit						branco	np	17	0	0	0	0	61	0	0	0	0	0	0	0				0			0	0	3	0
9659	x	19	4	2007	ct4	exit						white	np	19	1	0	0	2	138	0	0	0	0	0	0	0				0			0	4	6	0
10600	a44	2	2	2007	ct4	exit							danilo	29	0	0	0	13	374	0	0	0	0	0	7	0				0			0	2	1	0
10557	a42	19	1	2007	ct4	exit							danilo	5	0	0	0	5	113	0	0	0	0	0	3	0				0			0	3	10	0
9777	a3	10	26	2006	ct4	exit							danilo	19	1	1	0	26	167	0	0	0	0	0	1	0				0			0	0	1	0
9803	a4	10	25	2006	ct4	exit							danilo	14	0	0	0	17	205	0	0	0	0	0	0	0				0			0	0	2	0
9795	a4	10	24	2006	ct4	exit							danilo	19	0	0	0	10	264	0	0	0	0	0	1	0				0			0	1	0	0
10149	a22	11	24	2006	ct4	exit							danilo	8	0	0	0	16	38	0	0	0	0	0	2	0				0			0	0	0	0
10059	a17	11	21	2006	ct4	exit							danilo	2	0	0	0	54	111	0	0	0	0	1	1	0				0			0	0	1	0
10708	a50	12	21	2006	ct4	exit							danilo	7	0	0	0	8	106	1	0	0	0	1	3	0				1			0	2	7	0
10046	a17	11	20	2006	ct4	exit							danilo	28	0	0	0	95	187	1	0	0	0	2	3	0				0			0	0	1	0
9938	a11	12	18	2006	ct4	exit							danilo	53	0	0	0	5	233	1	0	0	0	1	5	0				0			0	2	15	0
10111	a20	11	17	2006	ct4	exit							danilo	12	0	0	0	48	112	0	0	0	0	0	0	0				0			0	1	4	0
9192	551	11	16	2006	ct4	exit							danilo	5	0	0	0	56	134	1	0	0	0	1	0	0		0	0	0	0	0	0	2	0	0	0	0		0		0
9099	546	11	13	2006	ct4	exit							danilo	2	0	0	0	10	158	0	0	0	0	0	0	0		0	0	0	0	0	0	3	1	0	0	0		0		0
9900	a9	19	12	2006	ct4	exit							danilo	15	0	0	0	10	90	0	0	0	0	0	2	0				0			0	0	0	0
10133	a21	23	11	2006	ct4	exit							danilo	4	1	0	0	24	78	0	0	0	0	2	0	0				0			0	2	0	0
9087	546	11	10	2006	ct4	exit							danilo	13	0	0	0	13	188	0	0	0	0	0	1	0		0	0	0	0	0	0	0	0	0	0	0		0		0
9922	a10	19	10	2006	ct4	exit							danilo	50	0	0	0	46	170	0	0	0	0	0	0	0				0			0	2	0	0
9813	a5	20	10	2006	ct4	exit							danilo	10	0	0	0	19	115	0	0	0	0	0	0	0				0			0	2	0	0
8622	533	1	9	2006	ct4	exit			0				danilo	46	0	0	0	8	113	1	0	0	0	0	0	0		0	0	0	0	0	0	2	1	0	0	0		0		0
8656	535	6	9	2006	ct4	exit			0				danilo	8	0	0	0	6	8	0	0	0	0	0	0	0		0	0	0	0	0	0	1	0	0	0	0		0		0
8665	536	7	9	2006	ct4	exit			0				danilo	10	0	0	0	9	55	0	0	0	0	0	0	0		0	0	0	0	0	0	3	0	0	0	0		0		0
8699	537	12	9	2006	ct4	exit			0				danilo	38	0	0	0	9	124	0	0	0	0	0	0	0		0	0	0	0	0	0	4	1	0	0	0		0		0
10011	a15	11	9	2006	ct4	exit							danilo	33	0	0	0	23	301	1	0	0	0	0	0	0				0			0	0	0	0	1afred
8359	520	3	8	2006	ct4	exit			0				abdul	12	0	0	0	7	85	0	0	0	0	0	0	0		0	0	0	0	0	0	0	0	0	0	0		0		0
8375	521	7	8	2006	ct4	exit			0				danilo	4	0	0	0	0	3	0	0	0	0	0	0	0		0	0	0	0	0	0	0	0	0	0	0		0		0
8474	526	10	8	2006	ct4	exit			0				danilo	7	0	0	0	0	0	0	0	0	0	0	0	0		0	0	0	0	0	0	3	0	0	0	0		0		0
8480	526	14	8	2006	ct4	exit			0				danilo	6	0	0	0	1	7	0	0	0	0	0	0	0		0	0	0	0	0	0	1	0	0	0	0		0		0
8505	528	21	8	2006	ct4	exit			0				danilo	7	0	0	0	7	56	0	0	0	0	0	0	0		0	0	0	0	0	0	2	1	0	0	0		0		0
8528	529	22	8	2006	ct4	exit			0				danilo	52	1	0	1	26	143	0	0	0	0	0	0	0		0	0	0	0	0	0	1	0	0	0	0		0		0
8545	530	23	8	2006	ct4	exit			0				danilo	32	0	0	0	36	90	0	0	0	0	0	1	0		0	0	0	0	0	0	2	1	0	0	0		0		0
8554	530	24	8	2006	ct4	exit			0				danilo	18	0	0	0	3	15	0	0	0	0	0	0	0		0	0	0	0	0	0	1	2	0	0	0		0		0
8572	531	29	8	2006	ct4	exit			0				danilo	40	0	0	0	26	146	0	0	0	0	0	1	0		0	0	0	0	0	0	2	0	0	0	0		0		0
8586	532	30	8	2006	ct4	exit			0				danilo	10	0	0	0	10	135	0	0	0	0	0	0	0		0	0	0	0	0	0	2	0	0	0	0		0		0
8081	505	1	6	2006	ct4	exit			0				danilo	17	0	0	0	4	19	0	0	0	0	0	0	0		0	0	0	0	0	0	1	2	0	0	0		0		0
8257	514	3	6	2006	ct4	exit			0				danilo	3	0	0	0	1	67	0	0	0	0	0	0	0		0	0	0	0	0	0	1	2	0	0	0		0		0
8309	518	4	6	2006	ct4	exit			0				danilo	2	0	0	0	3	8	0	0	0	0	0	0	0		0	0	0	0	0	0	0	0	0	0	0		0		0
8315	518	5	6	2006	ct4	exit			0				danilo	1	0	0	0	1	7	0	0	0	0	0	0	0		0	0	0	0	0	0	0	0	0	0	0		0		0
8229	513	6	6	2006	ct4	exit			0				danilo	4	0	0	0	4	60	0	0	0	0	0	0	0		0	0	0	0	0	0	0	0	0	0	0		0		0
8239	513	7	6	2006	ct4	exit			0				danilo	2	0	0	0	4	8	0	0	0	0	0	0	0		0	0	0	0	0	0	0	0	0	0	0		0		0
8139	508	9	6	2006	ct4	exit			0				danilo	14	0	0	0	47	54	0	0	0	0	0	0	0		0	0	0	0	0	0	1	1	1aedes	0	0		0		0
8040	503	12	6	2006	ct4	exit			0				danilo	0	0	0	0	1	7	0	0	0	0	0	0	0		0	0	0	0	0	0	0	0	0	0	0		0		0
8434	524	13	6	2006	ct4	exit			0				danilo	6	0	0	0	2	23	1	0	0	0	0	0	0		0	0	0	0	0	0	3	1	0	0	0		0		0
8270	516	14	6	2006	ct4	exit			0				danilo	4	0	0	0	9	51	0	0	0	0	0	0	0		0	0	0	0	0	0	9	4	0	0	0		0		0
8327	519	16	6	2006	ct4	exit			0				danilo	1	0	0	0	14	33	0	0	0	0	0	0	0		0	0	0	0	0	0	1	2	0	0	0		0		0
8200	511	20	6	2006	ct4	exit			0				danilo	4	0	0	0	14	34	0	0	0	0	0	0	0		0	0	0	0	0	0	0	0	0	0	0		0		0
8447	525	21	6	2006	ct4	exit			0				danilo	1	0	0	0	12	19	0	0	0	0	0	0	0		0	0	0	0	0	0	1	1	0	0	0		0		0
8459	525	22	6	2006	ct4	exit			0				abdul	5	0	0	0	8	8	0	0	0	0	0	0	0		0	0	0	0	0	0	0	0	0	0	0		0		0
8386	522	23	6	2006	ct4	exit			0				danilo	1	0	0	0	9	7	0	0	0	0	0	0	0		0	0	0	0	0	0	1	1	0	0	0		0		0
8402	522	27	6	2006	ct4	exit			0				danilo	0	0	0	0	0	0	0	0	0	0	0	0	0		0	0	0	0	0	0	0	1	0	0	0		0		0
8113	507	29	6	2006	ct4	exit			0				danilo	6	0	0	0	0	11	0	0	0	0	0	0	0		0	0	0	0	0	0	0	1	0	0	0		0		0
8115	507	30	6	2006	ct4	exit			0				danilo	1	0	0	0	0	1	0	0	0	0	0	0	0		0	0	0	0	0	0	0	1	0	0	0		0		0
7822	492	1	5	2006	ct4	exit			0				danilo	14	0	0	0	12	58	0	0	0	0	0	0	0		0	0	0	0	0	0	1	1	0	0	0		0		0
8012	502	12	5	2006	ct4	exit			0				danilo	10	0	0	0	20	53	0	0	0	0	0	0	0		0	0	0	0	0	0	3	0	0	0	0		0		0
7970	500	15	5	2006	ct4	exit			0				danilo	16	0	0	0	14	80	1	0	0	0	0	1	0		0	0	0	0	0	0	4	3	0	0	0		0		0
7986	501	23	5	2006	ct4	exit			0				danilo	12	0	0	1	1	29	0	0	0	0	0	0	0		0	0	0	0	0	0	0	1	0	0	0		0		0
7711	487	1	4	2006	ct4	exit			0				benilde	2	1	0	0	26	15	0	0	0	0	0	3	0		0	0	0	0	0	0	0	2	0	0	0		0		0
7762	489	17	4	2006	ct4	exit			0				danilo	5	0	0	0	7	53	0	0	0	0	0	0	0		0	0	0	0	0	0	0	1	0	0	0		0		0
7908	497	20	4	2006	ct4	exit			0				danilo	12	0	0	1	27	267	1	0	0	0	2	5	0		0	0	0	0	0	0	6	6	1aedes	0	0		0		0
7926	498	22	4	2006	ct4	exit			0				danilo	8	0	0	0	36	38	0	0	0	0	0	1	0		0	0	0	0	0	0	2	1	0	0	0		0		0
7952	499	23	4	2006	ct4	exit			0				danilo	22	0	0	0	33	81	0	0	0	0	1	3	0		0	0	0	0	0	0	14	12	0	0	0		0		0
7957	499	24	4	2006	ct4	exit			0				danilo	10	0	0	0	10	44	0	0	0	0	0	1	0		0	0	0	0	0	0	0	1	1aedes	0	0		0		0
7826	493	25	4	2006	ct4	exit			0				danilo	30	0	0	0	4	56	0	0	0	0	2	1	0		0	0	0	0	0	0	1	1	0	0	0		0		0
7839	493	26	4	2006	ct4	exit			0				danilo	13	0	0	0	13	43	0	0	0	0	1	1	0		0	0	0	0	0	0	0	1	0	0	0		0		0
7806	492	30	4	2006	ct4	exit			0				danilo	18	0	0	0	41	48	0	0	0	0	0	0	0		0	0	0	0	0	0	0	0	2aedes	0	0		0		0
7452	482	7	3	2006	ct4	exit			0				ricardina	86	0	0	0	43	214	3	0	0	0	18	8	0		0	0	0	0	0	0	3	4	0	0	0		0		0
7455	482	8	3	2006	ct4	exit			0				ricardina	12	0	0	0	109	86	5	0	0	0	2	13	1		0	0	1	0	0	0	0	0	0	0	0		0		0
7486	484	12	3	2006	ct4	exit			0				ricardina	14	0	0	0	50	93	3	0	0	0	7	2	0		0	0	1	0	0	0	6	3	1aeds	0	0		0		0
7499	484	13	3	2006	ct4	exit			0				pascoal	3	0	0	0	13	77	1	0	0	0	0	2	0		0	0	0	0	0	0	1	0	0	0	0		0		0
7370	478	14	3	2006	ct4	exit			0				abdul	66	13	0	0	70	128	0	0	0	0	4	8	0		0	0	0	0	0	0	1	1	0	0	0		0		0
7339	477	15	3	2006	ct4	exit			0				abdul	25	0	0	0	33	70	0	0	0	0	7	3	0		0	0	0	0	0	0	3	5	0	0	0		0		0
7383	479	17	3	2006	ct4	exit			0				ricardina	3	0	0	0	68	47	0	0	0	0	4	1	0		0	0	0	0	0	0	2	3	0	0	0		0		0
7599	486	20	3	2006	ct4	exit			0				ricardina	6	0	0	0	26	80	0	0	0	0	0	4	0		0	0	0	0	0	0	0	0	0	0	0		0		0				1 aedes
7612	487	21	3	2006	ct4	exit			0				ricardo	10	0	0	0	25	32	1	0	0	0	0	1	0		0	0	0	0	0	0	0	2	0	0	0		0		0
7624	487	22	3	2006	ct4	exit			0				ricardo	2	0	0	0	15	69	0	0	0	0	0	1	0		0	0	0	0	0	0	0	0	0	0	0		0		0
6736	449	22	2	2006	ct4	exit			0				danilo	13	0	0	0	12	79	2	0	0	0	0	4	0		0	0	0	0	0	0	1	2	0	0	0		0		0
7294	474	17	1	2006	ct4	exit			0				cristovao	12	0	0	0	2	39	2	0	0	0	2	14	0		0	0	0	0	0	0	2	6	0	0	0		0		0
7219	471	15	12	2005	ct4	exit			0				cristovao	10	0	0	0	4	50	7	0	0	0	5	0	0		0	0	0	0	0	0	5	3	0	0	0		0		0
6756	450	4	11	2005	ct4	exit			0				cristovao	8	0	0	0	4	215	2	0	0	0	2	8	0		0	0	0	0	0	0	0	0	0	0	0		0		0
6044	415	18	10	2005	ct4	exit			0				nelson	5	0	0	0	12	94	1	0	0	0	2	4	0		0	0	0	0	0	0	0	0	0	0	0		0		0
5905	408	28	7	2005	ct4	exit			0				nelson	1	0	0	0	3	18	1	0	0	0	2	1	1		0	0	0	0	0	0	3	0	0	0	0		0		0
6433	434	30	6	2005	ct4	exit			0				antonio	2	0	0	0	2	15	0	0	0	0	2	0	0		0	0	0	0	0	0	6	7	0	1	0		0		0
4890	359	4	4	2005	ct4	exit			0				ermelinda	5	0	0	0	23	19	1	0	0	0	0	0	0		0	0	0	0	0	0	0	0	0	0	0		0		0
4991	364	4	4	2005	ct4	exit			0				ermelinda	5	0	0	0	23	19	1	0	0	0	14	7	0		0	0	0	0	0	0	4	1	0	0	0		0		0
4904	359	5	4	2005	ct4	exit			0				ermelinda	5	0	0	0	11	27	1	0	0	0	0	0	0		0	0	0	0	0	0	0	0	0	0	0		0		0
5004	364	5	4	2005	ct4	exit			0				ermelinda	5	0	0	0	11	27	1	0	0	0	9	23	0		0	0	0	0	0	0	5	5	0	0	0		0		0
5026	365	7	4	2005	ct4	exit			0				ermelinda	2	0	0	0	11	19	0	0	0	2	20	16	0		0	0	0	0	0	0	0	1	0	0	0		0		0
4911	360	18	4	2005	ct4	exit			0				pedro	1	0	0	0	7	25	3	0	0	0	4	11	0		0	0	0	0	0	0	2	1	0	0	0		0		0
4928	361	19	4	2005	ct4	exit			0				pedro	1	0	0	0	6	25	3	0	0	0	3	18	0		0	0	0	0	0	0	0	1	0	0	0		0		0
4948	362	20	4	2005	ct4	exit			0				pedro	2	0	0	0	7	19	1	0	0	0	0	9	0		0	0	0	0	0	0	0	1	2aeds	0	0		0		0
4969	363	21	4	2005	ct4	exit			0				pedro	6	0	0	0	9	17	0	0	0	0	3	17	0		0	0	0	0	0	0	0	0	1aeds marc	0	0		0		0		3
5100	370	25	4	2005	ct4	exit			0				pedro	5	0	0	0	3	52	2	0	0	0	0	22	0		0	0	0	0	0	0	6	3	0	0	0		0		0
5112	370	26	4	2005	ct4	exit			0				pedro	4	0	0	0	5	40	3	0	0	0	6	12	0		0	0	0	0	0	0	1	2	0	0	0		0		0
5132	371	27	4	2005	ct4	exit			0				pedro	5	0	0	0	3	24	1	0	0	0	5	14	0		0	0	0	0	0	0	1	2	0	0	0		0		0
5328	379	28	4	2005	ct4	exit			0				pedro	0	0	0	0	15	18	0	0	0	0	0	5	0		0	0	0	0	0	0	1	12	0	0	0		0		0
4211	321	17	3	2005	ct4	exit			0				nelson	7	0	0	0	33	72	2	0	0	0	6	19	0		0	0	0	0	0	0	0	0	0	0	0		0		0
4363	331	8	2	2005	ct4	exit			0				machado	7	0	0	0	57	38	6	0	0	0	10	10	0		0	0	0	0	0	0	2	7	0	0	0		0		0
4381	332	16	2	2005	ct4	exit			0				eduardo	8	0	0	0	22	33	0	0	0	0	8	14	0		0	0	0	0	0	0	7	0	0	0	0		0		0
4393	332	17	2	2005	ct4	exit			0				eduardo	2	0	0	0	8	43	5	0	0	0	4	19	0		0	0	0	0	0	0	1	0	0	0	0		0		0
4412	333	18	2	2005	ct4	exit			0				eduardo	2	0	0	0	15	18	4	0	0	0	8	22	0		0	0	0	0	0	0	3	6	0	0	0		0		0
4268	324	19	2	2005	ct4	exit			0				eduardo	4	0	0	0	21	32	1	0	0	0	11	16	0		2	0	0	0	0	0	0	2	0	0	0		0		0
4408	333	20	2	2005	ct4	exit			0				eduardo	4	0	0	0	8	34	1	0	0	0	3	11	0		0	0	1	0	0	0	1	0	0	0	0		0		0
4282	324	21	2	2005	ct4	exit			0				eduardo	3	0	0	0	21	28	1	0	0	0	10	14	0		0	0	0	0	0	0	0	1	0	0	0		0		0
4632	344	22	2	2005	ct4	exit			0				eduardo	3	0	0	0	8	27	5	0	0	0	4	13	0		0	0	0	0	0	0	3	0	0	0	0		0		0
4527	339	23	2	2005	ct4	exit			0				eduardo	2	0	0	0	20	34	0	0	0	0	6	7	0		0	0	0	0	0	0	4	1	0	0	0		0		0
4047	313	28	2	2005	ct4	exit			0				antonio	4	0	0	0	2	24	0	0	0	0	0	3	0		0	0	0	0	0	0	0	2	0	0	0		0		0
3901	305	3	1	2005	ct4	exit		0	0	0	00:00:00		antonio	14	0	0	0	26	33	8	0	0	0	12	4	0	0	0	0	0	0	0	0	0	3	0	0	0		0		0	0	0
3950	308	10	1	2005	ct4	exit			0				nelson	11	0	0	0	24	54	3	0	0	0	8	8	0		0	0	0	0	0	0	0	2	0	0	0		0		0	0	0
3647	291	2	12	2004	ct4	exit		0	0	0	00:00:00		Ricardina	10	0	0	0	20	57	3	0	0	0	7	15	0	0	0	0	0	0	0	0	1	2	0	0	0		0		0	0	0
3777	297	8	12	2004	ct4	exit		0	0	0	00:00:00		Ricardina	9	0	0	0	14	60	1	0	0	0	9	5	0	0	0	0	0	0	0	0	1	3	0	0	0		0		0	0	0
3741	295	10	12	2004	ct4	exit		0	0	0	00:00:00		Ricardina	0	0	0	0	1	3	0	0	0	0	1	1	0	0	0	0	0	0	0	0	2	5	0	0	0		0		0	0	0
3752	296	11	12	2004	ct4	exit		0	0	0	00:00:00		Ricardina	4	0	0	0	18	8	1	2	1	0	3	6	0	0	0	0	0	0	0	0	3	4	1	0	0		0		0	0	0
3828	300	14	12	2004	ct4	exit		0	0	0	00:00:00		helena	10	0	0	0	28	20	10	0	0	0	8	7	0	0	0	0	0	0	0	0	3	1	0	0	0		0		0	0	0
3386	278	18	11	2004	ct4	exit		0	0	0	00:00:00		Ricardina	6	0	0	0	19	52	2	0	0	0	6	5	0	0	0	0	0	0	0	0	2	10	0	0	0		0		0	1	0
3136	267	16	11	2004	ct4	exit		0	0	0	00:00:00		emilia	5	0	0	0	12	9	1	0	0	0	3	1	0	0	0	0	0	0	0	0	2	2	0	0	0		0		0	0	0
3369	277	17	11	2004	ct4	exit		0	0	0	00:00:00		marcia	7	0	0	0	19	54	2	0	0	0	7	10	0	0	0	0	0	0	0	0	0	12	0	0	0		0		0	0	0
3443	280	22	11	2004	ct4	exit		0	0	0	00:00:00		marcia	3	0	0	0	0	23	0	0	0	0	0	2	0	0	0	0	0	0	0	0	3	0	0	0	0		0		0	0	0
3452	281	23	11	2004	ct4	exit		0	0	0	00:00:00		helena	28	0	0	0	34	43	7	0	0	0	12	6	0	0	0	0	0	0	0	0	8	12	0	0	0		0		0	0	0
3510	284	24	11	2004	ct4	exit		0	0	0	00:00:00		anabela	0	0	0	0	0	12	0	0	0	0	0	3	0	0	0	0	0	0	0	0	3	3	0	0	0		0		0	0	0
3526	285	25	11	2004	ct4	exit		0	0	0	00:00:00		halima	3	0	0	2	34	20	6	0	0	0	12	18	0	0	0	0	0	0	0	0	0	6	0	0	0		0		0	0	0
3541	285	26	11	2004	ct4	exit		0	0	0	00:00:00		helena	5	0	0	0	15	44	3	0	0	0	14	12	0	0	0	0	0	0	0	0	1	0	0	0	0		0		0	0	0
3547	286	27	11	2004	ct4	exit		0	0	0	00:00:00		helena	0	0	0	0	0	0	0	0	0	0	0	0	0	0	0	0	0	0	0	0	0	0	0	0	0		0		0	0	formigas
3562	286	28	11	2004	ct4	exit		0	0	0	00:00:00		anabela	3	0	0	0	5	2	0	0	0	0	2	10	0	0	0	0	0	0	0	0	3	0	0	0	0		0		0	0	0
2807	253	13	10	2004	ct4	exit		0	0	0	00:00:00		nelson	0	0	0	0	68	94	4	0	0	0	9	5	0	0	0	0	0	0	0	0	0	0	0	0	0		0		0	0	0
3286	273	24	10	2003	ct4	exit		0	0	0	00:00:00		nelson	6	0	0	0	68	13	5	0	0	0	2	10	0	0	0	0	0	0	0	0	3	1	0	0	0		0		0	0	0
5582	392	10	8	2005	coz282	exit			0				ricardina	2	0	0	0	1	6	1	0	0	0	0	0	0		0	0	0	0	0	0	1	0	0	0	0		0		0
6033	414	27	7	2005	coz276	exit			0				ricardina	0	0	0	0	1	4	0	0	0	0	0	0	0		0	0	0	0	0	0	1	0	0	0	1	red	0		0
4738	349	16	12	2004	coz1134	exit			0				ilda	0	0	0	0	0	6	20	0	0	0	1	2	0		0	0	0	0	0	0	0	0	0	0	0		0		0
7015	461	23	1	2006	coz 276	exit			0				ricardina	16	0	0	0	3	153	2	0	0	0	1	39	0		0	0	0	0	0	0	3	0	0	0	0		0		0
10581	a44	1	23	2007	coz 24	exit						rosa	fatima	16	0	0	0	1	87	1	0	0	0	0	10	0				0			0	1	0	0
10523	a41	1	22	2007	coz 23	exit							fatima	1	0	0	0	0	16	0	0	0	0	0	4	0				0			0	0	0	0
9010	555	25	10	2008	casa ricardo	exit			0				ricardo	10	0	0	0	8	86	0	0	0	0	0	0	0		0	0	0	0	0	0	0	0	0	0	0		0		0
12140		20	5	2003	candida	exit		0					ne	10	0	1	1	20	95	3	1	0	0	0	5	0	0	0	0	0	0	0	0	0	3		0	0		0
12153		21	5	2003	candida	exit		1					q	9	0	0	0	17	60	6	0	1	0	0	10	0	0	0	0	0	0	0	0	0	1		0	0		0
12174		24	5	2003	candida	exit		0					ne	5	0	0	0	24	18	0	0	1	0	0	7	0	0	0	0	0	0	0	0	0	0		0	0		0
		11	6	2003	cacilda	exit		1					q	3	0	0	0	0	28	0	0	0	0	0	2	0	0	0	0	0	0	0	0	0	0		0	0
		12	6	2003	cacilda	exit		2					n	6	0	0	0	0	18	0	0	0	0	0	1	0	0	0	0	0	0	0	0	0	1		0	0
6130	419	19	10	2005	c nova220	exit			0				nelson	7	0	0	0	27	102	2	0	0	0	3	10	0		0	0	0	0	0	0	0	0	0	0	0		0		0
5813	404	21	8	2005	c nova220	exit			0				nelson	4	0	0	0	7	74	0	0	0	0	0	1	0		0	0	0	0	0	0	0	0	0	0	0		0		0
5818	404	22	8	2005	c nova220	exit			0				nelson	3	0	0	0	3	63	1	0	0	0	0	2	0		0	0	0	0	0	0	4	1	0	0	0		0		0
5829	404	23	8	2005	c nova220	exit			0				nelson	5	0	0	1	3	73	0	0	0	0	0	3	0		0	0	0	0	0	0	0	0	0	0	0		0		0
9590	t	4	2	2007	brondza	exit							danilo	0	0	0	0	3	5	0	0	0	0	0	0	0				0			0	0	1	0
6122	419	15	10	2005	bine3214	exit			0				dc	5	0	0	0	6	90	3	1	0	0	0	34	0		0	0	0	0	0	0	1	0	0	0	0		0		0
		8	10	2003	benilda	exit		0					n	22	0	0	0	5	19	0	0	0	0	0	0	0	0	0	0	0	0	0	0	0	1		0	0
		15	10	2003	benilda	exit		0					n	23	0	0	0	53	74	0	0	0	0	0	0	0	0	0	0	0	0	0	0	0	0		0	0
11833		12	8	2003	armindo	exit		1					n	12	0	0	17	0	68	0	0	0	0	0	2	0	0	0	0	0	0	0	0	0	0		0	0		0
11862		13	8	2003	armindo	exit		1					q	5	0	0	0	1	28	0	0	0	0	0	1	0	0	0	0	0	0	0	0	1	0		0	0		0
11861		14	8	2003	armindo	exit		0					n	0	0	0	0	3	11	0	0	0	0	0	0	0	0	0	0	0	0	0	0	0	0		0	0		0
11995		25	8	2003	armindo	exit		0					q	3	0	0	0	0	21	1	0	0	0	0	0	0	0	0	0	0	0	0	0	0	0		0	0		0
11142	661	25	2	2008	armando	exit			0				juvencia	4	0	0	0	0	40	0	0	0	0	0	0	0		0	0	0	0	0	0	3	1	0	0	0		0		0
4895	359	4	4	2005	ant25	exit			0				anabela	4	0	0	0	19	22	5	0	0	0	0	0	0		0	0	0	0	0	0	0	0	0	0	0		0		0
4996	364	4	4	2005	ant25	exit			0				anabela	4	0	0	0	19	22	5	0	0	0	17	19	0		0	0	1	0	0	0	1	0	0	0	0		0		0
5011	365	5	4	2005	ant25	exit			0				anabela	1	0	0	0	17	42	6	0	0	0	20	51	0		0	0	0	0	0	0	1	0	0	0	0		0		0
5071	368	6	4	2005	ant25	exit			0				anabela	1	0	0	0	18	1	0	0	0	0	30	18	0		0	0	0	0	0	0	0	0	0	0	0		0		0
5068	368	7	4	2005	ant25	exit			0				anabela	3	0	0	0	28	6	0	0	0	0	16	13	0		0	0	0	0	0	0	0	1	0	0	0		0		0
5056	367	11	4	2005	ant25	exit			0				anabela	2	0	0	0	13	14	5	0	0	0	8	1	0		0	0	0	0	0	0	0	0	0	0	0		0		0
4863	357	3	3	2005	ant25	exit			0				anabela	1	0	0	0	3	1	1	0	0	0	1	0	1		0	0	0	0	0	0	0	0	1aeds	0	0		0		0
4828	356	29	3	2005	ant25	exit			0				anabela	5	0	0	0	10	17	5	0	0	0	10	19	0		0	0	0	0	0	0	0	0	0	0	0		0		0
4840	356	30	3	2005	ant25	exit			0				anabela	6	0	0	0	22	29	8	0	0	0	25	42	0		0	0	0	0	0	0	1	0	0	0	0		0		0
4854	357	31	3	2005	ant25	exit			0				anabela	5	0	0	0	8	3	3	0	0	0	5	2	0		0	0	0	0	0	0	0	0	0	0	0		0		0
4210	321	17	3	2005	ant 25	exit			0				anabela	0	0	0	0	13	6	4	0	0	0	23	0	0		0	0	0	0	0	0	0	0	0	0	0		0		0
4216	321	20	3	2005	ant 25	exit			0				anabela	1	0	0	0	22	11	4	0	0	0	13	20	0		0	0	0	0	0	0	0	0	0	0	0		0		0
4225	322	21	3	2005	ant 25	exit			0				anabela	1	0	0	0	21	44	4	0	0	0	4	38	0		0	0	0	0	0	0	0	0	0	0	0		0		0
4234	322	22	3	2005	ant 25	exit			0				anabela	2	0	0	1	14	31	7	0	2	0	17	47	0		0	0	0	0	0	0	2	2	0	0	0		0		0
4562	341	23	3	2005	ant 24	exit			0				anabela	1	0	0	0	12	35	4	0	0	0	9	36	0		0	0	0	0	0	0	0	0	0	0	0		0		0
4570	341	24	3	2005	ant 24	exit			0				anabela	0	0	0	0	14	45	7	0	0	0	11	37	0		0	1	0	0	0	0	0	0	0	0	0		0		0
4581	341	27	3	2005	ant 24	exit			0				anabela	5	0	0	0	19	30	7	0	0	0	6	25	0		0	0	0	0	0	0	1	0	0	0	0		0		0
9697	590	9	7	2007	alima	exit			0				eduardo	12	0	0	0	2	26	0	0	0	0	0	0	0		0	0	0	0	0	0	0	0	0	0	0		0		0
5506	389	3	10	2005	68nova	exit			0				cristovao	0	0	0	0	3	4	0	0	0	0	0	0	0		0	0	0	0	0	0	0	1	0	0	0		0		0
8165	510	6	7	2006	4587??	exit			0				ricardina	1	0	0	0	3	9	0	0	0	0	0	0	0		0	0	0	0	0	0	5	6	0	0	0		0		0
8346	520	31	7	2006	4587??	exit			0				ricardina	2	0	0	0	3	8	0	0	0	0	0	0	0		0	0	0	0	0	0	2	0	0	0	0		0		0
11030	656	16	7	2008	39/0	exit			0				juvencia	22	0	0	0	11	112	0	0	0	0	0	0	0		0	0	0	0	0	0	0	0	0	0	0		0		0
11657	687	21	10	2008	3850?	exit							beti	2	0	0	0	3	73	0	0	0	0	0	0	0		0	0	0	0	0	0	0	0	0	0	0		0		0
11658	687	21	10	2008	3850?	exit							mariamo	6	0	0	0	34	116	0	0	0	0	0	0	0		0	0	0	0	0	0	0	0	0	0	0		0		0
5779	402	10	10	2005	226n	exit			0				nelson	0	0	0	0	6	102	1	0	0	0	0	5	0		0	0	0	0	0	0	0	0	0	0	0		0		0
9644	587	19	11	2007	222-b	exit			0				rute	0	0	0	0	0	9	0	0	0	0	0	0	0		0	0	0	0	0	0	2	3	0	0	0		0		0
5782	402	11	10	2005	10n	exit			0				nelson	9	0	0	0	28	72	2	0	0	0	7	5	0		0	0	0	0	0	0	0	0	0	0	0		0		0
10563	a43	1	24	2007	??	exit						branco	fatima		0	0	0	0	14	0	0	0	0	0	1	0				0			0	0	0	0
10348	a32	29	3	2007	??	exit							alima	10	0	0	0	0	22	0	0	0	0	0	0	0				2			0	0	0	0
10378	a33	5	28	2007	?	exit							?	21	0	0	0	1	36	0	0	0	0	0	0	0				0			0	2	0	0
10274	a28	6	7	2007	?	exit							bacar	9	0	0	0	2	98	0	0	0	0	0	0	0				0			0	0	0	0
10280	a28	6	7	2007	?	exit							?	22	0	0	2	0	80	0	0	0	0	0	0	0				0			0	0	0	0
10281	a28	6	7	2007	?	exit							?	26	0	0	0	4	151	0	0	0	0	0	0	0				0			0	0	0	0
3013	262	28	9	2004	?	exit		0	0	0	00:00:00		antonio	18	1	0	1	25	107	0	0	0	0	0	1	0	0	0	0	0	0	0	0	2	1	0	0	0		0		0	0	0
12893		4	5	2004	?	exit							ed	0	0	0	0	12	11	0	0	0	0	0	19	0	0	0	0	0	0	0	0	0	0		0	0
7509	485	27	2	2006	30209	exit			0				danilo	8	0	0	0	13	59	0	0	0	0	2	2	0		0	0	2	0	0	0	0	0	0	0	0		0		0
8016	502	12	5	2006	5487	exit			0				ricardina	11	0	0	0	38	50	0	0	0	0	0	0	0		0	0	0	0	0	0	1	0	0	0	0		0		0
8312	518	4	6	2006	4587	exit			0				ricardina	5	0	0	0	3	0	0	0	0	0	0	0	0		0	0	0	0	0	0	0	0	0	0	0		0		0
8242	513	8	6	2006	4587	exit			0				ricardo	4	0	0	0	81	61	0	0	0	0	2	0	0		0	0	0	0	0	0	1	0	0	0	0		0		0
8141	508	9	6	2006	4587	exit			0				ricardina	6	0	0	0	68	40	0	0	0	0	0	0	0		0	0	0	0	0	0	0	0	0	0	0		0		0
8277	516	15	6	2006	4587	exit			0				ricardina	5	0	0	0	23	38	0	0	0	0	0	0	0		0	0	0	0	0	0	4	0	0	0	0		0		0
8119	507	30	6	2006	4587	exit			0				ricardina	0	0	0	0	1	3	0	0	0	0	0	0	0		0	0	0	0	0	0	3	0	0	0	0		0		0
4383	332	16	2	2005	4010	exit			0				mimi	0	0	0	0	23	6	1	0	0	0	13	2	0		0	0	0	0	0	0	0	0	0	0	0		0		0
5009	365	4	5	2005	4008	exit			0				mimi	1	0	0	0	8	7	0	0	0	0	11	3	0		0	0	0	0	0	0	0	0	0	0	0		0		0
5008	365	5	4	2005	4008	exit			0				mimi	1	0	0	0	6	16	3	0	0	0	8	9	0		0	0	1	0	0	0	0	0	0	0	0		0		0
5017	365	6	4	2005	4008	exit			0				mimi	0	0	0	0	3	3	0	0	0	0	3	2	0		0	0	0	0	0	0	0	0	0	0	0		0		0
5095	369	13	4	2005	4008	exit			0				mimi	1	0	0	0	7	4	3	0	0	0	7	9	0		0	0	0	0	0	0	0	0	0	0	0		0		0
4077	314	2	3	2005	4008	exit			0				mimi	1	0	0	0	4	13	14	0	0	0	12	15	0		0	0	0	0	0	0	1	0	0	0	0		0		0
4091	315	3	3	2005	4008	exit			0				mimi	2	0	0	0	9	6	5	0	0	0	20	8	0		0	0	0	0	0	0	0	0	0	0	0		0		0
4862	357	4	3	2005	4008	exit			0				mimi	0	0	0	0	1	7	3	0	0	0	13	12	0		0	0	0	0	0	0	0	0	0	0	0		0		0
4108	316	6	3	2005	4008	exit			0				mimi	5	0	0	0	5	7	21	0	0	0	14	19	0		0	0	0	0	0	0	0	0	0	0	0		0		0
4115	316	7	3	2005	4008	exit			0				mimi	4	0	0	0	1	11	4	0	0	0	2	12	0		0	0	0	0	0	0	0	1	0	0	0		0		0
4114	316	8	3	2005	4008	exit			0				mimi	2	0	0	1	4	7	9	1	0	0	6	16	0		0	0	0	0	0	0	1	0	0	0	0		0		0
4171	319	10	3	2005	4008	exit			0				mimi	1	0	0	0	33	13	12	0	0	0	24	8	0		0	0	0	0	0	0	1	0	0	0	0		0		0
4176	319	13	3	2005	4008	exit			0				mimi	3	0	0	0	5	8	87	0	0	0	13	17	0		0	0	0	0	0	0	1	0	0	0	0		0		0
4181	319	14	3	2005	4008	exit			0				mimi	3	0	0	0	3	1	22	0	0	0	7	5	0		0	0	0	0	0	0	0	0	0	0	0		0		0
4191	320	15	3	2005	4008	exit			0				mimi	2	0	0	0	10	4	15	0	0	0	5	5	0		1	0	0	0	0	0	0	0	0	0	0		0		0
4199	320	16	3	2005	4008	exit			0				mimi	1	0	0	0	0	0	4	0	0	0	0	0	0		0	0	0	0	0	0	0	0	0	0	0		0		0
4212	321	17	3	2005	4008	exit			0				mimi	0	0	0	0	7	1	3	0	0	0	12	1	0		0	0	0	0	0	0	0	0	0	0	0		0		0
4215	321	20	3	2005	4008	exit			0				mimi	1	0	0	0	12	2	0	0	0	0	15	9	0		0	0	0	0	0	0	0	0	0	0	0		0		0
4224	321	21	3	2005	4008	exit			0				mimi	1	0	0	0	0	7	1	0	1	0	10	10	0		0	0	0	0	0	0	0	0	0	0	0		0		0
4240	322	22	3	2005	4008	exit			0				mimi	2	0	0	0	0	10	3	0	0	0	2	16	0		0	0	0	0	0	0	0	0	1	0	0		0		0
4563	341	23	3	2005	4008	exit			0				mimi	1	0	0	0	2	5	3	0	1	0	2	13	0		0	0	0	0	0	0	0	1	0	0	0		0		0
4572	341	24	3	2005	4008	exit			0				mimi	1	0	0	0	10	4	2	0	0	0	7	6	0		0	0	0	0	0	0	1	0	0	0	0		0		0
4578	341	27	3	2005	4008	exit			0				mimi	0	0	0	0	13	3	2	0	0	0	7	28	0		0	0	0	0	0	0	2	0	0	0	0		0		0
4546	340	28	3	2005	4008	exit			0				mimi	2	0	0	0	10	9	23	0	0	0	5	29	0		0	0	0	0	0	0	0	1	0	0	0		0		0
4560	340	29	3	2005	4008	exit			0				mimi	3	0	0	0	0	9	10	0	0	0	5	11	0		0	0	1	0	0	0	1	0	0	0	0		0		0
4834	356	30	3	2005	4008	exit			0				mimi	0	0	0	0	1	0	5	0	0	0	2	2	0		0	0	0	0	0	0	0	0	0	0	0		0		0
4263	323	6	2	2005	4008	exit			0				mimi	5	0	0	2	14	13	11	0	1	0	13	22	0		0	0	0	0	0	0	1	0	0	0	0		0		0
4431	334	7	2	2005	4008	exit			0				mimi	0	0	0	0	18	10	10	0	0	0	11	15	0		0	0	0	0	0	0	1	0	0	0	0		0		0
4435	334	8	2	2005	4008	exit			0				mimi	4	0	0	0	13	13	12	0	0	0	14	28	0		0	0	0	0	0	0	1	1	0	0	0		0		0
4364	331	9	2	2005	4008	exit			0				mimi	5	0	0	0	14	11	19	0	0	0	17	16	0		0	0	0	0	0	0	1	0	0	0	0		0		0
4748	350	10	2	2005	4008	exit			0				mimi	5	0	0	0	17	7	13	0	0	0	26	26	0		0	0	1	0	0	0	1	0	0	0	0		0		0
4778	351	13	2	2005	4008	exit			0				mimi	2	0	0	0	13	12	14	0	0	0	21	32	0		0	0	0	0	0	0	0	1	0	0	0		0		0
4780	351	14	2	2005	4008	exit			0				mimi	5	0	0	0	8	13	6	0	0	0	11	14	0		0	0	0	0	0	0	0	4	0	0	0		0		0
4414	333	18	2	2005	4008	exit			0				mimi	8	0	0	0	15	19	4	0	0	0	27	29	0		0	0	0	0	0	0	0	0	0	0	0		0		0
4271	324	20	2	2005	4008	exit			0				mimi	4	0	0	0	15	12	7	0	0	0	22	16	0		1	0	0	0	0	0	0	0	0	0	0		0		0
4631	344	21	2	2005	4008	exit			0				mimi	2	0	0	0	14	16	4	0	0	0	10	27	0		0	0	0	0	0	0	0	1	0	0	0		0		0
4633	344	22	2	2005	4008	exit			0				mimi	7	0	0	0	14	5	7	0	0	0	17	11	0		0	0	0	0	0	0	1	0	0	0	0		0		0
4529	339	23	2	2005	4008	exit			0				mimi	3	0	0	0	7	9	15	0	0	0	15	16	0		0	0	0	0	0	0	1	1	0	0	0		0		0
4608	343	24	2	2005	4008	exit			0				mimi	1	0	0	0	23	11	7	0	0	0	16	8	0		0	0	0	0	0	0	0	0	0	0	0		0		0
4019	311	25	2	2005	4008	exit			0				mimi	1	0	0	0	18	12	14	0	0	0	7	13	0		0	0	0	0	0	0	0	0	0	0	0		0		0
4017	311	27	2	2005	4008	exit			0				mimi	0	0	0	0	5	20	13	0	0	0	12	16	0		0	0	0	0	0	0	0	0	0	0	0		0		0
4041	312	28	2	2005	4008	exit			0				mimi	2	0	0	0	14	12	12	0	0	0	18	4	0		0	0	0	0	0	0	0	0	0	0	0		0		0
	694	5	1	2009	3906	exit								7	0	0	0	10	36	0	0	0	0	0	0	0	0	0	0	0	0	0	0	2	3	0	0
	695	16	1	2009	3906	exit								10	0	0	0	7	48	1	0	0	0	0	0	0	0	0	0	0	0	0	0	5	1	0	0
	696	23	1	2009	3906	exit								4	0	0	0	10	63	0	0	0	0	0	0	0	0	0	0	0	0	0	0	6	5	0	0
	696	27	1	2009	3906	exit								3	0	0	0	18	60	2	0	0	0	0	0	0	0	0	0	0	0	0	0	2	8	0	0
	693	12	12	2008	3906	exit								22	0	0	0	6	76	0	0	0	0	0	0	0	0	1	0	0	0	0	0	0	0	0	0
	693	15	12	2008	3906	exit								8	0	0	0	5	151	0	0	0	0	0	0	0	0	0	0	0	0	0	0	0	0	0	0
	694	22	12	2008	3906	exit								6	0	0	0	1	176	0	0	0	0	0	0	0	0	1	0	0	0	0	0	0	0	0	0
11456	677	4	11	2008	3906	exit							juvencia	2	0	0	0	3	133	0	0	0	0	0	0	0		0	0	0	0	0	0	1	0	0	0	0		0		0
11414	675	6	11	2008	3906	exit							juvencia	1	0	0	0	2	188	0	0	0	0	0	0	0		0	0	0	0	0	0	0	0	0	0	0		0		0
11423	675	7	11	2008	3906	exit							juvencia	3	0	0	0	15	188	0	0	0	0	0	0	0		0	0	0	0	0	0	0	0	0	0	0		0		0
11732	691	10	11	2008	3906	exit							juvencia	3	0	0	0	16	143	0	0	0	0	0	0	0		0	0	0	1	0	0	0	0	0	0	0		0		0
11740	691	11	11	2008	3906	exit							juvencia	12	0	0	0	16	170	0	0	0	0	0	0	0		0	0	0	0	0	0	0	0	0	0	0		0		0
11711	690	12	11	2008	3906	exit							juvencia	4	0	0	0	10	229	0	0	0	0	0	0	0		0	0	0	0	0	0	0	0	0	0	0		0		0
11724	690	13	11	2008	3906	exit							juvencia	5	0	0	0	40	178	0	0	0	0	0	0	0		0	0	0	0	0	0	1	0	0	0	0		0		0
11698	689	17	11	2008	3906	exit							juvencia	4	0	1	0	0	31	0	0	0	0	0	0	0		0	0	0	0	0	0	0	0	0	0	0		0		0
11706	689	18	11	2008	3906	exit							juvencia	1	0	0	0	3	106	0	0	0	0	0	1	0		0	0	0	0	0	0	1	0	0	0	0		0		0
11570	682	1	10	2008	3906	exit							juvencia	26	2	0	0	7	203	0	0	0	0	0	0	0		0	0	0	0	0	0	0	0	0	0	0		0		0
11600	684	2	10	2008	3906	exit							juvencia	58	4	0	0	10	162	0	0	0	0	0	0	0		0	0	0	0	0	0	0	0	0	0	0		0		0
11487	678	3	10	2008	3906	exit							juvencia	12	0	0	0	18	228	0	0	0	0	0	0	0		0	0	0	0	0	0	0	1	0	0	0		0		0
11604	684	3	10	2008	3906	exit							juvencia	18	0	0	0	10	150	0	0	0	0	0	0	0		0	0	0	0	0	0	1	0	1ruph	0	0		0		0
11611	685	6	10	2008	3906	exit							juvencia	33	0	0	0	12	201	0	0	0	0	0	0	0		0	0	0	0	0	0	0	2	3ruph	0	0		0		0
11627	685	8	10	2008	3906	exit							juvencia	48	0	0	0	35	230	0	0	0	0	0	0	0		0	0	0	0	0	0	0	1	1sang ruph	0	0		0		0
11518	680	9	10	2008	3906	exit							juvencia	56	0	0	0	43	284	0	0	0	0	0	0	0		0	0	0	0	0	0	0	0	0	0	0		0		0
11527	680	10	10	2008	3906	exit							juvencia	8	0	0	0	6	46	0	0	0	0	0	0	0		0	0	0	0	0	0	0	0	0	0	0		0		0
11506	679	14	10	2008	3906	exit							juvencia	27	0	0	0	11	80	0	0	0	0	0	0	0		0	0	0	0	0	0	0	0	0	0	0		0		0
11636	686	15	10	2008	3906	exit							juvencia	12	0	0	0	4	60	0	0	0	0	0	0	0		0	0	0	0	0	0	1	0	1ruph	0	0		0		0
11641	686	16	10	2008	3906	exit							juvencia	19	0	0	0	8	87	0	0	0	0	0	0	0		0	0	0	0	0	0	0	0	0	0	0		0		0
11647	686	20	10	2008	3906	exit							juvencia	1	0	0	0	2	120	0	0	0	0	0	0	0		0	0	0	0	0	0	1	0	0	0	0		0		0
11659	687	21	10	2008	3906	exit							juvencia	4	0	0	0	12	109	0	0	0	0	0	0	0		0	0	0	0	0	0	1	0	0	0	0		0		0
11663	687	22	10	2008	3906	exit							juvencia	4	0	0	0	10	242	0	0	0	0	0	0	0		0	0	0	0	0	0	1	1	0	0	0		0		0
11676	688	24	10	2008	3906	exit							juvencia	8	0	0	0	5	66	0	0	0	0	0	0	0		0	0	0	0	0	0	2	0	0	0	0		0		0
11682	688	27	10	2008	3906	exit							juvencia	16	0	0	0	3	173	0	0	0	0	0	0	0		0	0	0	0	0	0	0	5	0	0	0		0		0
11689	688	28	10	2008	3906	exit							juvencia	12	0	0	0	14	160	0	0	0	0	0	0	0		0	0	0	0	0	0	4	10	0	0	0		0		0
11441	676	29	10	2008	3906	exit							juvencia	13	0	0	0	5	103	0	0	0	0	0	0	0		0	0	0	0	0	0	1	0	0	0	0		0		0
11451	676	30	10	2008	3906	exit							juvencia	5	0	0	0	9	218	0	0	0	0	0	0	0		0	0	0	0	0	0	0	0	0	0	0		0		0
11476	678	31	10	2008	3906	exit							juvencia	12	0	0	0	11	148	0	0	0	0	0	0	0		0	0	1	0	0	0	0	0	0	0	0		0		0
11406	674	1	9	2008	3906	exit							juvencia	4	1	0	0	5	182	0	0	0	0	0	0	0		0	0	0	0	0	0	0	0	0	0	0		0		0
11285	668	3	9	2008	3906	exit							juvencia	17	0	0	0	5	271	0	0	0	0	1	0	0		0	0	0	0	0	0	0	0	0	0	0		0		0
11256	667	4	9	2008	3906	exit							juvencia	39	1	0	0	9	154	0	0	0	0	0	0	0		0	0	0	0	0	0	3	2	0	0	0		0		0
11212	665	9	9	2008	3906	exit			0				juvencia	16	0	0	0	14	190	0	0	0	0	0	0	0		0	0	0	0	0	0	0	0	0	0	0		0		0
11218	665	11	9	2008	3906	exit			0				juvencia	12	0	0	0	16	219	0	0	0	0	0	0	0		0	0	0	0	0	0	0	0	0	0	0		0		0
11231	665	15	9	2008	3906	exit							juvencia	22	0	0	0	2	98	0	0	0	0	0	0	0		0	0	0	0	0	0	0	0	0	0	0		0		0
11203	664	16	9	2008	3906	exit			0				juvencia	20	0	0	0	14	126	0	0	0	0	0	0	0		0	0	0	0	0	0	3	0	0	0	0		0		0
11573	683	17	9	2008	3906	exit							juvencia	28	0	0	0	4	207	0	0	0	0	0	0	0		0	0	0	0	0	0	4	2	0	0	0		0		0
11577	683	18	9	2008	3906	exit							juvencia	30	0	0	0	12	146	0	0	0	0	0	0	0		0	0	0	0	0	0	1	0	0	0	0		0		0
11581	683	19	9	2008	3906	exit							juvencia	43	0	0	0	13	234	0	0	0	0	0	0	0		0	0	0	0	0	0	1	0	0	0	0		0		0
11592	683	22	9	2008	3906	exit							juvencia	10	0	0	0	3	5	0	0	0	0	0	0	0		0	0	0	0	0	0	1	0	0	0	0		0		0
11535	681	23	9	2008	3906	exit							juvencia	34	1	0	0		150	0	0	0	0	0	0	0		0	0	0	0	0	0	4	7	0	0	0		0		0
11545	681	26	9	2008	3906	exit							juvencia	18	0	0	0	13	173	0	0	0	0	0	0	0		0	0	0	0	0	0	0	0	1ruph	0	0		0		0
11557	682	29	9	2008	3906	exit							juvencia	31	0	0	0	21	222	0	0	0	0	0	0	0		0	0	0	0	0	0	0	0	0	0	0		0		0
11559	682	30	9	2008	3906	exit							juvencia	24	0	0	0	5	156	0	0	0	0	0	0	0		0	0	0	0	0	0	0	0	1ruph	0	0		0		0
10028	606	1	8	2008	3906	exit			0				juvencia	30	0	0	0	3	141	1	0	0	0	0	0	0		0	0	0	0	0	0	3	1	0	0	0		0		0
9994	604	5	8	2008	3906	exit			0				juvencia	61	0	0	0	9	303	0	0	0	0	1	0	0		0	0	0	0	0	0	2	0	0	0	0		0		0
9963	603	6	8	2008	3906	exit			0				juvencia	25	0	0	0	5	99	0	0	0	0	0	0	0		0	0	0	0	0	0	1	1	0	0	0		0		0
9946	602	8	8	2008	3906	exit			0				juvencia	15	0	0	0	11	227	0	0	0	0	0	0	0		0	0	0	0	0	0	2	1	0	0	0		0		0
9953	602	11	8	2008	3906	exit			0				juvencia	16	0	0	0	4	168	0	0	0	0	0	0	0		0	0	0	0	0	0	0	2	0	0	0		0		0
9932	601	12	8	2008	3906	exit			0				juvencia	20	0	0	0	10	94	0	0	0	0	0	0	0		0	0	0	0	0	0	0	1	0	0	0		0		0
11305	669	15	8	2008	3906	exit							juvencia	34	0	0	0	8	323	0	0	0	0	0	0	0		0	0	0	0	0	0	2	3	0	0	0		0		0
11311	669	18	8	2008	3906	exit							juvencia	17	2	0	0	4	34	0	0	0	0	0	0	0		0	0	0	0	0	0	0	0	0	0	0		0		0
11379	673	20	8	2008	3906	exit							juvencia	21	0	0	0	8	254	0	0	0	0	0	0	0		0	0	0	0	0	0	0	0	0	0	0		0		0
11335	671	21	8	2008	3906	exit							juvencia	20	0	0	0	14	109	0	0	0	0	0	0	0		0	0	0	0	0	0	0	0	0	0	0		0		0
11346	671	22	8	2008	3906	exit							juvencia	49	0	0	0	1	43	0	0	0	0	0	0	0		0	0	0	0	0	0	0	0	0	0	0		0		0
11313	670	25	8	2008	3906	exit							juvencia	38	0	0	0	2	14	0	0	0	0	0	0	0		0	0	0	0	0	0	0	0	0	0	0		0		0
11323	670	26	8	2008	3906	exit							juvencia	36	0	0	0	6	439	0	0	0	0	0	0	0		0	0	0	0	0	0	2	0	0	0	0		0		0
11233	666	27	8	2008	3906	exit							juvencia	20	0	0	0	7	431	0	0	0	0	0	0	0		0	0	0	0	0	0	1	0	0	0	0		0		0
11249	666	28	8	2008	3906	exit							juvencia	23	0	0	0	15	224	0	0	0	0	0	0	0		0	0	0	0	0	0	0	0	0	0	0		0		0
11398	674	29	8	2008	3906	exit							juvencia	13	0	0	0	15	175	0	0	0	0	0	0	0		0	0	0	0	0	0	0	0	0	0	0		0		0
11023	655	1	7	2008	3906	exit			0				juvencia	9	0	0	0	2	72	0	0	0	0	0	0	0		0	0	0	0	0	0	3	5	0	0	0		0		0
11016	655	1	7	2008	3906	exit			0				juvencia	20	0	0	0	4	87	0	0	0	0	0	0	0		0	0	0	0	0	0	1	2	0	0	0		0		0
11115	660	3	7	2008	3906	exit			0				juvencia	24	0	0	0	8	163	0	0	0	0	0	0	0		0	0	0	0	0	0	2	4	0	0	0		0		0
10033	606	4	7	2008	3906	exit			0				juvencia	25	0	0	0	2	201	0	0	0	1	1	0	0		0	0	0	0	0	0	2	2	0	0	0		0		0
11121	660	4	7	2008	3906	exit			0				juvencia	29	0	0	0	8	128	0	0	0	0	0	0	1		0	0	0	0	0	0	0	1	0	0	0		0		0
11126	660	7	7	2008	3906	exit			0				juvencia	11	0	0	0	4	136	0	0	0	0	0	0	0		0	0	0	0	0	0	8	2	0	0	0		0		0
10070	608	9	7	2008	3906	exit			0				juvencia	28	0	0	0	18	165	0	0	0	0	0	0	1		0	0	0	0	0	0	0	1	0	0	0		0		0
10078	609	10	7	2008	3906	exit			0				juvencia	3	0	0	0	10	112	0	0	0	0	0	0	0		0	0	0	0	0	0	1	0	0	0	0		0		0
10089	609	11	7	2008	3906	exit			0				juvencia	18	0	0	0	5	86	0	0	0	0	0	0	0		0	0	0	0	0	0	0	0	0	0	0		0		0
11081	658	15	7	2008	3906	exit			0				juvencia	19	0	0	0	4	53	0	0	0	0	0	0	0		0	0	0	0	0	0	0	0	0	0	0		0		0
11040	656	17	7	2008	3906	exit			0				juvencia	24	0	0	0	2	75	0	0	0	0	0	0	0		0	0	0	0	0	0	0	2	0	0	0		0		0
11057	657	18	7	2008	3906	exit			0				juvencia	16	0	0	0	6	70	0	0	0	0	0	0	0		0	0	0	0	0	0	2	0	0	0	0		0		0
11046	656	21	7	2008	3906	exit			0				juvencia	11	0	0	0	6	179	0	0	0	0	0	0	0		0	0	0	0	0	0	0	1	0	0	0		0		0
11063	657	22	7	2008	3906	exit			0				juvencia	21	0	0	0	7	143	0	0	0	0	0	0	0		0	0	0	0	0	0	1	0	0	0	0		0		0
10129	611	24	7	2008	3906	exit			0				juvencia	16	0	0	0	11	116	0	0	0	0	0	0	0		0	0	0	0	0	0	0	0	0	0	0		0		0
10140	612	25	7	2008	3906	exit			0				juvencia	24	0	0	0	5	107	0	0	0	0	0	0	0		0	0	0	0	0	0	1	1	0	0	0		0		0
10147	612	28	7	2008	3906	exit			0				juvencia	33	0	0	0	0	180	0	0	0	0	0	0	1		0	0	0	0	0	0	3	0	0	0	0		0		0
10150	612	29	7	2008	3906	exit			0				juvencia	16	0	0	0	7	101	0	0	0	0	0	0	1		0	0	4	0	0	0	1	0	0	0	0		0		0
10151	612	29	7	2008	3906	exit			0				tomas	4	0	0	0	2	79	0	0	0	0	0	0	0		0	0	0	0	0	0	1	1	0	0	0		0		0
11095	659	30	7	2008	3906	exit			0				juvencia	38	0	0	0	8	164	0	0	0	0	0	0	0		0	0	0	0	0	0	3	0	0	0	0		0		0
10337	621	5	5	2008	3906	exit			0				efigenia	3	0	0	0	2	144	0	0	0	0	0	0	0		0	0	0	0	0	0	0	0	0	0	0		0		0
10372	623	6	5	2008	3906	exit			0				efigenia	4	0	0	0	0	80	0	0	0	0	0	0	0		0	0	0	0	0	0	0	1	0	0	0		0		0
10370	622	8	5	2008	3906	exit			0				efigenia	6	0	0	0	3	73	0	0	0	0	0	0	0		0	0	0	0	0	0	0	1	0	0	0		0		0
10311	620	12	5	2008	3906	exit			0				efigenia	7	0	0	0	3	201	0	0	0	0	0	0	0		0	0	0	0	0	0	1	1	0	0	0		0		0
10276	618	14	5	2008	3906	exit			0				efigenia	5	0	0	0	5	161	0	0	0	0	0	0	0		0	0	0	0	0	0	0	0	0	0	0		0		0
10652	637	15	5	2008	3906	exit			0				efigenia	11	0	0	0	9	145	0	0	0	0	0	0	0		0	0	0	0	0	0	1	0	0	0	0		0		0
10668	637	16	5	2008	3906	exit			0				efigenia	26	0	0	0	5	126	0	0	0	0	0	0	0		0	0	0	0	0	0	0	1	0	0	0		0		0
10475	628	1	4	2008	3906	exit		0	b				tomas	2	0	0	0	0	13	0	0	0	0	0	0	0		0	0	0	0	0	0	0	0	0	0	0		0		0
10591	634	2	4	2008	3906	exit			0				efigenia	6	0	0	0	1	33	0	0	0	0	0	0	0		0	0	0	0	0	0	0	0	0	0	0		0		0
10605	634	4	4	2008	3906	exit			0				efigenia	1	0	0	0	1	23	0	0	0	0	0	0	0		0	0	0	0	0	0	1	0	0	0	0		0		0
10579	633	8	4	2008	3906	exit			0				efigenia	3	0	0	0	3	10	0	0	0	0	0	0	0		0	0	0	0	0	0	1	0	0	0	0		0		0
10585	633	9	4	2008	3906	exit			0				efigenia	1	0	0	0	1	44	0	0	0	0	0	0	0		0	0	0	0	0	0	0	0	0	0	0		0		0
10863	647	10	4	2008	3906	exit			0				efigenia	7	0	0	0	0	43	0	0	0	0	0	0	0		0	0	0	0	0	0	1	0	0	0	0		0		0
10554	632	11	4	2008	3906	exit			0				efigenia	3	0	0	0	3	55	0	0	0	0	0	0	0		0	0	0	0	0	0	0	0	0	0	0		0		0
10613	635	14	4	2008	3906	exit			0				efigenia	0	0	0	0	4	50	0	0	0	0	0	0	0		0	0	0	0	0	0	0	0	0	0	0		0		0
10400	624	17	4	2008	3906	exit			0				efigenia	17	0	0	0	2	132	0	0	0	0	0	0	0		0	0	0	0	0	0	1	0	0	0	0		0		0
10637	636	18	4	2008	3906	exit			0				efigenia	15	0	0	0	2	120	0	0	0	0	0	0	0		0	0	0	0	0	0	1	0	0	0	0		0		0
10524	630	22	4	2008	3906	exit			0				efigenia	4	0	0	0	6	170	0	0	0	0	0	1	0		0	0	0	0	0	0	0	0	0	0	0		0		0
10530	630	23	4	2008	3906	exit			0				efigenia	6	0	0	0	3	64	0	0	0	0	0	0	0		0	0	0	0	0	0	0	0	0	0	0		0		0
10871	648	25	4	2008	3906	exit			0				efigenia	16	0	0	0	3	102	0	0	0	0	0	0	0		0	0	0	0	0	0	2	0	0	0	0		0		0
10884	648	28	4	2008	3906	exit			0				efigenia	17	0	0	0	2	179	0	0	0	0	0	0	0		0	0	0	0	0	0	0	0	0	0	0		0		0
10550	631	29	4	2008	3906	exit			0				efigenia	16	0	0	0	0	118	0	0	0	0	0	0	0		0	0	0	0	0	0	1	1	0	0	0		0		0
10164	613	30	4	2008	3906	exit			0				efigenia	10	0	0	0	0	110	0	0	0	0	0	0	0		0	0	0	0	0	0	3	1	0	0	0		0		0
10188	614	10	3	2008	3906	exit			0				juvencia	9	0	0	0	0	0	0	0	0	0	0	0	0		0	0	0	0	0	0	0	0	0	0	0		0		0
10773	643	11	3	2008	3906	exit			0				juvencia	13	0	0	0	1	78	0	0	0	0	0	0	0		0	0	0	0	0	0	1	1	0	0	0		0		0
10779	643	12	3	2008	3906	exit			0				juvencia	6	1	0	0	2	58	0	0	0	0	0	0	0		0	0	0	0	0	0	0	0	0	0	0		0		0
10795	644	13	3	2008	3906	exit			0				juvencia	8	0	0	0	0	43	0	0	0	0	0	0	0		0	0	0	0	0	0	0	1	0	0	0		0		0
10798	644	14	3	2008	3906	exit			0				juvencia	16	0	0	0	0	76	0	0	0	0	0	0	0		0	0	0	0	0	0	1	0	0	0	0		0		0
10736	641	17	3	2008	3906	exit			0				juvencia	2	0	0	0	2	37	0	0	0	0	0	0	0		0	0	0	0	0	0	0	0	0	0	0		0		0
10744	641	18	3	2008	3906	exit			0				efigenia	7	0	0	0	1	53	1	0	0	0	0	0	0		0	0	0	0	0	0	0	0	0	0	0		0		0
10723	640	19	3	2008	3906	exit			0				efigenia	3	0	0	0	0	20	0	0	0	0	0	0	0		0	0	0	0	0	0	1	2	0	0	0		0		0
10674	638	20	3	2008	3906	exit			0				efigenia	3	0	0	0	1	38	0	0	0	0	0	0	0		0	0	0	0	0	0	0	1	0	0	0		0		0
10688	638	24	3	2008	3906	exit			0				efigenia	5	0	0	0	1	50	0	0	0	0	0	0	0		0	0	0	0	0	0	0	0	0	0	0		0		0
10434	626	25	3	2008	3906	exit		1	porta				efigenia	5	0	0	0	0	27	0	0	0	0	0	0	0		0	0	0	0	0	0	1	0	0	0	0		0		0
10433	626	25	3	2008	3906	exit		1	b				fatima	0	0	0	0	1	4	0	0	0	0	0	0	0		0	0	1	0	0	0	0	0	0	0	0		0		0
10432	626	25	3	2008	3906	exit		1	a				tomas	2	0	0	0	0	2	0	0	0	0	0	0	0		0	0	0	0	0	0	0	0	0	0	0		0		0
10439	626	26	3	2008	3906	exit		0	a				fatima	0	0	0	0	1	9	0	0	0	0	0	0	0		0	0	0	0	0	0	0	0	0	0	0		0		0
10438	626	26	3	2008	3906	exit		0	porta				feliz	1	0	0	0	0	39	0	0	0	0	0	0	0		0	0	0	0	0	0	0	0	0	0	0		0		0
10440	626	26	3	2008	3906	exit		0	b				tomas	0	0	0	0	0	6	0	0	0	0	0	0	0		0	0	0	0	0	0	1	0	0	0	0		0		0
10448	626	27	3	2008	3906	exit		0	a				efigenia	7	0	0	0	1	26	0	0	0	0	0	0	0		0	0	0	0	0	0	1	0	0	0	0		0		0
10446	626	27	3	2008	3906	exit		0	porta				feliz	6	0	1	0	3	56	0	0	0	0	0	0	0		0	0	0	0	0	0	0	0	1aede	0	0		0		0
10447	626	27	3	2008	3906	exit		0	b				tomas	3	0	0	0	0	15	0	0	0	0	0	0	0		0	0	0	0	0	0	1	0	0	0	0		0		0
10832	646	28	3	2008	3906	exit			0				efigenia	9	0	0	0	19	42	0	0	0	0	0	0	0		0	0	0	0	0	0	1	2	0	0	0		0		0
10450	626	31	3	2008	3906	exit		1	a				efigenia	2	0	0	0	0	30	0	0	0	0	0	0	0		0	0	0	0	0	0	1	0	0	0	0		0		0
10449	626	31	3	2008	3906	exit		1	b				tomas	0	0	1	0	0	20	0	0	0	0	0	0	0		0	0	0	0	0	0	2	0	0	0	0		0		0
10472	628	31	3	2008	3906	exit		1	b				fatima	1	0	0	0	0	7	0	0	0	0	0	0	0		0	0	0	0	0	0	0	0	0	0	0		0		0
10756	642	26	2	2008	3906	exit			0				juvencia	3	0	0	0	0	27	0	0	0	0	0	0	0		0	0	0	0	0	0	2	0	0	0	0		0		0
	696	23	1	2009	3905	exit								6	0	0	0	26	36	0	0	0	0	0	0	0	0	2	0	0	0	0	0	6	7	0	0
11013	655	1	7	2008	3905	exit			0				tomas	18	0	0	0	14	183	0	0	0	0	0	0	0		0	0	0	0	0	0	0	0	0	0	0		0		0
11026	655	2	7	2008	3905	exit			0				tomas	13	0	0	0	13	95	0	0	1	0	0	0	0		0	0	0	0	0	0	0	0	0	0	0		0		0
11113	660	3	7	2008	3905	exit			0				tomas	38	0	0	0	12	174	1	0	0	0	0	0	0		0	0	0	0	0	0	0	0	0	0	0		0		0
11120	660	4	7	2008	3905	exit			0				tomas	37	0	0	0	39	188	0	0	0	0	1	0	0		0	0	0	0	0	0	0	0	0	0	0		0		0
10066	608	9	7	2008	3905	exit			0				tomas	27	0	0	0	70	255	0	0	0	0	0	0	0		0	0	0	0	0	0	0	0	0	0	0		0		0
10088	609	10	7	2008	3905	exit			0				tomas	14	0	0	0	8	90	0	0	0	0	0	0	0		0	0	0	0	0	0	0	0	0	0	0		0		0
10079	609	10	7	2008	3905	exit			0				tomas	4	0	0	1	37	183	0	0	0	0	0	0	0		0	0	0	0	0	0	0	0	0	0	0		0		0
11073	658	14	7	2008	3905	exit			0				tomas	3	0	0	0	4	31	0	0	0	0	0	0	0		0	0	0	0	0	0	0	0	0	0	0		0		0
11082	658	15	7	2008	3905	exit			0				tomas	9	0	0	0	4	11	0	0	0	0	0	0	0		0	0	0	0	0	0	1	0	0	0	0		0		0
11089	658	16	7	2008	3905	exit			0				tomas	9	0	0	0	8	50	0	0	0	0	0	0	0		0	0	0	0	0	0	0	0	0	0	0		0		0
11038	656	17	7	2008	3905	exit			0				tomas	9	0	0	0	4	50	0	0	0	0	0	0	0		0	0	0	0	0	0	0	0	0	0	0		0		0
11054	657	18	7	2008	3905	exit			0				tomas	13	0	0	0	13	53	0	0	0	0	0	0	0		0	0	0	0	0	0	0	0	0	0	0		0		0
11058	657	21	7	2008	3905	exit			0				tomas	17	0	0	0	12	75	0	0	0	0	0	0	0		0	0	0	0	0	0	0	0	0	0	0		0		0
11066	657	22	7	2008	3905	exit			0				tomas	20	0	0	0	16	136	0	0	0	0	0	0	0		0	0	0	0	0	0	0	0	0	0	0		0		0
10133	611	24	7	2008	3905	exit			0				tomas	9	0	0	0	3	135	0	0	0	0	0	0	0		0	0	0	0	0	0	0	0	0	0	0		0		0
9885	599	2	6	2008	3905	exit			0				tomas	35	0	0	0	36	268	0	0	0	0	0	0	0		0	0	0	0	0	0	0	0	0	0	0		0		0
10047	607	9	6	2008	3905	exit			0				tomas	28	0	0	0	6	240	0	0	0	0	0	0	0		0	0	0	0	0	0	0	0	0	0	0		0		0
9896	600	10	6	2008	3905	exit			0				tomas	27	0	0	0	3	168	0	0	0	0	0	0	0		0	0	0	0	0	0	0	0	0	0	0		0		0
9906	600	11	6	2008	3905	exit			0				tomas	15	0	0	0	10	178	0	0	0	0	0	0	0		0	0	0	0	0	0	0	1	0	0	0		0		0
9914	600	12	6	2008	3905	exit			0				tomas	9	0	0	4	44	110	0	0	0	0	0	0	0		0	0	0	0	0	0	0	0	0	0	0		0		0
9871	598	13	6	2008	3905	exit			0				tomas	14	0	0	0	30	77	0	0	0	0	0	0	0		0	0	0	0	0	0	1	0	0	0	0		0		0
10223	615	16	6	2008	3905	exit			0				tomas	13	0	0	0	12	102	0	0	0	0	0	0	0		0	0	0	0	0	0	0	2	1aede	0	0		0		0
10196	615	17	6	2008	3905	exit			0				tomas	25	0	0	0	18	156	1	0	0	0	0	0	0		0	0	0	0	0	0	1	0	0	0	0		0		0
10206	615	18	6	2008	3905	exit			0				tomas	10	0	0	0	22	114	0	0	0	0	0	0	0		0	0	0	0	0	0	0	0	0	0	0		0		0
11182	663	19	6	2008	3905	exit			0				tomas	8	0	0	0	34	61	0	0	0	0	0	0	0		0	0	0	0	0	0	0	0	0	0	0		0		0
11184	663	20	6	2008	3905	exit			0				tomas	53	0	0	0	28	234	0	0	1	0	0	0	0		0	0	0	0	0	0	0	0	0	0	0		0		0
10006	605	23	6	2008	3905	exit			0				tomas	29	0	0	0	56	203	0	0	0	0	0	0	0		0	0	0	0	0	0	1	1	0	0	0		0		0
10271	618	13	5	2008	3905	exit			0				tomas	25	0	0	0	42	397	0	0	0	0	0	0	0		0	0	0	0	0	0	0	1	0	0	0		0		0
10280	618	14	5	2008	3905	exit			0				tomas	18	0	0	0	48	206	0	0	0	0	0	0	0		0	0	0	0	0	0	1	0	0	0	0		0		0
10658	637	15	5	2008	3905	exit			0				tomas	29	0	0	0	51	405	0	0	0	0	1	0	1sang		0	0	0	0	0	0	0	1	0	0	0		0		0
10260	617	19	5	2008	3905	exit			0				tomas	27	0	0	0	21	183	1	0	0	0	0	0	0		0	0	0	0	0	0	0	0	0	0	0		0		0
10991	654	20	5	2008	3905	exit			0				tomas	16	0	0	0	40	159	0	0	0	0	0	0	sang		0	0	0	0	0	0	0	0	0	0	0		0		0
11006	654	21	5	2008	3905	exit			0				tomas	33	0	0	0	28	225	0	0	0	0	0	0	0		0	0	0	0	0	0	0	0	0	0	0		0		0
10933	651	22	5	2008	3905	exit			0				tomas	28	0	0	0	17	161	0	0	0	0	0	0	0		0	0	0	0	0	0	0	0	0	0	0		0		0
10910	650	23	5	2008	3905	exit			0				tomas	40	0	0	0	18	175	0	0	0	0	0	0	0		0	0	0	0	0	0	2	0	0	0	0		0		0
10918	650	26	5	2008	3905	exit			0				tomas	22	0	0	0	21	279	0	0	0	0	0	0	0		0	0	0	0	0	0	0	0	0	0	0		0		0
10928	650	27	5	2008	3905	exit			0				tomas	24	0	0	0	6	209	0	0	0	0	0	0	0		0	0	1	0	0	0	0	1	0	0	0		0		0
9884	599	29	5	2008	3905	exit			0				tomas	66	0	0	0	40	337	0	0	0	0	0	0	0		0	0	0	0	0	2	0	0	0	0	0		0		0
10310	619	30	5	2008	3905	exit			0				tomas	29	0	0	0	43	25	0	0	0	0	0	0	0		0	0	0	0	0	0	0	0	0	0	0		0		0
	693	16	12	2008	3904	exit								9	0	0	0	2	56	0	0	0	0	0	0	0	0	0	0	0	0	0	0	0	0	0	0
11455	677	4	11	2008	3904	exit							tomas	2	0	0	0	16	80	0	0	0	0	0	0	0		0	0	2	0	0	0	0	1	0	0	0		0		0
11468	677	5	11	2008	3904	exit							tomas	2	0	0	0	12	43	0	0	0	0	0	0	0		0	0	3	0	0	0	2	4	0	0	0		0		0
11424	675	7	11	2008	3904	exit							tomas	26	0	0	0	37	116	0	0	0	0	0	0	0		2	2male	0	0	0	0	0	0	0	0	0		0		0
11471	677	9	11	2008	3904	exit							tomas	10	0	0	0	30	79	0	0	0	0	0	0	0		0	0	0	2	0	0	4	2	0	0	0		0		0
11744	691	11	11	2008	3904	exit							tomas	13	0	0	0	24	66	0	0	0	0	0	0	0		0	0	0	0	0	0	3	1	0	0	0		0		0
11489	678	3	10	2008	3904	exit							tomas	8	0	0	0	3	120	0	0	0	0	0	0	0		0	0	0	0	0	0	0	0	1ruph	0	0		0		0
11639	686	16	10	2008	3904	exit							tomas	12	0	0	0	3	100	0	0	0	0	0	0	0		0	0	0	0	0	0	0	1	0	0	0		0		0
11668	687	22	10	2008	3904	exit							tomas	2	0	0	0	3	107	0	0	0	0	0	0	0		0	0	0	0	0	0	2	0	0	0	0		0		0
11672	688	23	10	2008	3904	exit							tomas	4	0	0	0	5	103	0	0	0	0	0	0	0		0	0	12	0	0	0	0	0	0	0	0		0		0
11671	688	23	10	2008	3904	exit							tomas	4	0	0	0	5	103	0	0	0	0	0	0	0		0	0	0	0	0	0	3	0	0	0	0		0		0
11675	688	24	10	2008	3904	exit							tomas	7	0	0	0	2	53	0	0	0	0	0	0	0		0	0	0	0	0	0	0	2	0	0	0		0		0
11437	676	28	10	2008	3904	exit							tomas	2	0	0	0	3	70	0	0	0	0	0	0	0		0	0	0	0	0	0	0	0	0	0	0		0		0
11438	676	29	10	2008	3904	exit							tomas	15	0	0	0	6	117	0	0	0	0	0	0	0		0	0	0	0	0	0	1	4	1ruph	0	0		0		0
11472	678	30	10	2008	3904	exit							tomas	7	0	0	0	3	68	0	0	0	0	0	0	0		0	0	0	0	0	0	0	1	0	0	0		0		0
11479	678	31	10	2008	3904	exit							tomas	8	0	0	0	3	171	0	0	0	0	0	0	0		0	0	0	1	0	0	3	0	0	0	0		0		0
10957	652	3	6	2008	3904	exit			0				tomas	6	0	0	0	0	140	0	0	0	0	0	0	0		0	0	0	0	0	0	5	3	0	0	0		0		0
10977	653	4	6	2008	3904	exit			0				tomas	24	0	0	0	3	133	0	0	0	0	0	0	0		0	0	0	0	0	0	2	1	0	0	0		0		0
9836	597	5	6	2008	3904	exit			0				tomas	24	0	0	0	2	178	0	0	0	0	0	0	0		0	0	0	0	0	0	3	0	0	0	0		0		0
9845	597	6	6	2008	3904	exit			0				tomas	18	0	0	0	1	184	0	0	0	0	0	0	0		0	0	0	0	0	0	4	1	0	0	0		0		0
10907	649	2	4	2008	3904	exit			0				tomas	4	0	0	0	0	27	0	0	0	0	0	0	0		0	0	0	0	0	0	0	0	0	0	0		0		0
10602	634	4	4	2008	3904	exit			0				tomas	5	0	0	0	0	46	0	0	0	0	0	0	0		0	0	0	0	0	0	0	0	0	0	0		0		0
10552	632	11	4	2008	3904	exit			0				tomas	8	0	0	0	0	66	0	0	0	0	0	0	0		0	0	0	0	0	0	1	0	0	0	0		0		0
10638	636	18	4	2008	3904	exit			0				tomas	26	0	0	0	0	153	0	0	0	0	0	0	0		0	0	0	0	0	0	5	0	0	0	0		0		0
10805	644	14	3	2008	3904	exit			0				tomas	9	0	0	0	0	60	0	0	0	0	0	0	0		0	0	0	0	0	0	0	0	0	0	0		0		0
10831	646	28	3	2008	3904	exit			0				tomas	10	0	0	0	1	70	0	0	0	0	0	0	0		0	0	0	0	0	0	1	0	0	0	0		0		0
10905	649	2	4	2008	3901	exit			0				pascoal	2	0	0	0	0	3	0	0	0	0	0	0	0		0	0	0	0	0	0	0	0	0	0	0		0		0
10176	614	7	3	2008	3901	exit			0				pascoal	13	0	0	0	5	103	0	0	0	0	0	1	0		0	0	0	0	0	0	0	0	0	0	0		0		0
11458	677	4	11	2008	3900	exit							farida	1	0	0	0	3	56	0	0	0	0	0	0	0		0	0	0	0	0	0	2	0	0	0	0		0		0
11463	677	5	11	2008	3900	exit							farida	0	0	0	0	2	84	0	0	0	0	0	0	0		0	0	0	0	0	0	2	0	0	0	0		0		0
11421	675	7	11	2008	3900	exit							farida	2	0	0	0	3	134	0	0	0	0	0	0	0		0	0	0	0	0	0	0	0	0	0	0		0		0
11429	675	10	11	2008	3900	exit							farida	5	0	0	0	0	46	0	0	0	0	0	0	0		0	0	0	0	0	0	0	0	0	0	0		0		0
11737	691	11	11	2008	3900	exit							mariamo	7	2	0	0	6	104	0	0	0	0	0	0	0		0	0	0	0	0	0	0	0	0	0	0		0		0
11749	691	12	11	2008	3900	exit							mariamo	1	0	0	0	6	29	0	0	0	0	0	0	0		0	0	0	1	0	0	0	0	0	0	0		0		0
11717	690	13	11	2008	3900	exit							mariamo	5	1	0	0	5	60	0	0	0	0	0	0	0		0	0	0	1	0	0	1	1	0	0	0		0		0
11725	690	14	11	2008	3900	exit							mariamo	4	0	0	0	4	83	0	0	0	0	0	0	0		0	0	0	0	0	0	1	3	0	0	0		0		0
11705	689	18	11	2008	3900	exit							mariamo	2	0	0	0	3	42	0	0	0	0	0	0	0		0	0	0	0	0	0	3	1	0	0	0		0		0
11599	684	2	10	2008	3900	exit							farida	1	1	0	0	2	18	0	0	0	0	0	0	0		0	0	0	0	0	0	0	0	0	0	0		0		0
11485	678	3	10	2008	3900	exit							farida	7	0	0	0	12	48	0	0	0	0	0	0	0		0	0	0	0	0	0	1	0	0	0	0		0		0
11618	685	6	10	2008	3900	exit							farida	8	0	0	0	6	44	0	0	0	0	0	0	0		0	0	0	0	0	0	0	0	0	0	0		0		0
11626	685	7	10	2008	3900	exit							farida	17	0	0	0	6	124	0	0	0	0	0	0	0		0	0	0	0	0	0	0	0	0	0	0		0		0
11524	680	9	10	2008	3900	exit							farida	7	0	0	0	4	24	0	0	0	0	0	0	0		0	0	0	0	0	0	1	1	0	0	0		0		0
11492	679	10	10	2008	3900	exit							farida	9	0	0	0	16	92	0	0	0	0	0	0	0		0	0	0	0	0	0	0	0	0	0	0		0		0
11498	679	13	10	2008	3900	exit							farida	5	0	0	0	3	66	0	0	0	0	0	0	0		0	0	1	0	0	0	1	0	0	0	0		0		0
11507	679	14	10	2008	3900	exit							farida	7	0	0	0	12	48	0	0	0	0	0	0	0		0	0	0	0	0	0	0	2	0	0	0		0		0
11635	686	15	10	2008	3900	exit							farida	9	0	0	0	7	62	0	0	0	0	0	0	0		0	0	0	0	0	0	0	0	0	0	0		0		0
11644	686	16	10	2008	3900	exit							farida	15	0	0	0	9	133	0	0	0	0	0	0	0		0	0	0	0	0	0	0	0	0	0	0		0		0
11646	686	20	10	2008	3900	exit							farida	2	0	0	0	5	46	0	0	0	0	0	0	0		0	0	0	0	0	0	0	0	0	0	0		0		0
11654	687	21	10	2008	3900	exit							farida	1	0	0	0	2	57	0	0	0	0	0	0	0		0	0	0	0	0	0	0	0	0	0	0		0		0
11665	687	22	10	2008	3900	exit							benilde	6	0	0	0	10	146	0	0	0	0	0	0	0		0	0	0	0	0	0	0	0	0	0	0		0		0
11678	688	24	10	2008	3900	exit							benilde	6	0	0	0	6	111	0	0	0	0	0	0	0		0	0	0	0	0	0	0	0	0	0	0		0		0
11680	688	27	10	2008	3900	exit							farida	1	0	0	0	1	37	0	0	0	0	0	0	0		0	0	0	0	0	0	0	0	0	0	0		0		0
11688	688	28	10	2008	3900	exit							farida	3	0	0	0	12	61	0	0	0	0	0	0	0		0	0	0	0	0	0	0	2	0	0	0		0		0
11477	678	31	10	2008	3900	exit							farida	11	0	0	0	2	79	0	0	0	0	0	0	0		0	0	0	0	0	0	0	0	0	0	0		0		0
11408	674	1	9	2008	3900	exit							farida	5	0	0	0	2	116	0	0	0	0	0	0	0		0	0	0	0	0	0	0	0	0	0	0		0		0
11276	668	2	9	2008	3900	exit							farida	4	0	0	0	2	58	0	0	0	0	0	0	0		0	0	0	0	0	0	0	0	0	0	0		0		0
11284	668	3	9	2008	3900	exit							farida	3	0	0	0	10	38	0	0	0	0	0	0	0		0	0	0	0	0	0	0	0	0	0	0		0		0
11214	665	9	9	2008	3900	exit			0				farida	2	0	0	0	7	106	0	0	0	0	0	0	0		0	0	0	0	0	0	0	0	0	0	0		0		0
11221	665	11	9	2008	3900	exit			0				farida	0	0	0	0	3	15	0	0	0	0	0	0	0		0	0	0	0	0	0	1sang	0	0	0	0		0		0
11228	665	12	9	2008	3900	exit							farida	7	0	0	1	3	51	0	0	0	0	0	0	0		0	0	0	0	0	0	0	0	0	0	0		0		0
11211	664	17	9	2008	3900	exit			0				farida	10	0	0	0	7	60	0	0	0	0	0	0	0		0	0	0	0	0	0	0	0	0	0	0		0		0
11575	683	18	9	2008	3900	exit							farida	8	0	0	0	1	33	0	0	0	0	0	0	0		0	0	0	0	0	0	1	0	0	0	0		0		0
11588	683	19	9	2008	3900	exit							farida	4	0	0	0	5	58	0	0	0	0	0	0	0		0	0	0	0	0	0	0	1	0	0	0		0		0
11593	683	22	9	2008	3900	exit							farida	12	0	0	0	0	3	0	0	0	0	0	0	0		0	0	0	0	0	0	1	0	0	0	0		0		0
11538	681	23	9	2008	3900	exit							farida	8	0	0	0	7	29	0	0	0	0	0	0	0		0	0	0	0	0	3	0	0	0	0	0		0		0
11541	681	24	9	2008	3900	exit							farida	3	0	0	0	23	41	0	0	0	0	0	0	1sang		0	0	0	0	0	0	3	1	0	0	0		0		0
11550	681	26	9	2008	3900	exit							farida	1	0	0	0	0	6	0	0	0	0	0	0	0		0	0	0	0	0	0	0	0	0	0	0		0		0
11558	682	30	9	2008	3900	exit							farida	11	0	0	0	6	173	0	0	0	0	0	0	0		0	0	0	0	0	0	0	1	0	0	0		0		0
10021	606	1	8	2008	3900	exit			0				farida	5	0	0	0	3	29	0	0	0	0	0	0	0		0	0	0	0	0	0	2	1	0	0	0		0		0
9978	604	4	8	2008	3900	exit			0				farida	38	0	0	0	10	248	0	0	0	0	0	0	0		0	0	0	0	0	0	1	0	0	0	0		0		0
9988	604	5	8	2008	3900	exit			0				farida	22	0	0	0	11	117	0	0	0	0	0	0	0		0	0	0	0	0	0	1	0	0	0	0		0		0
9965	603	6	8	2008	3900	exit			0				farida	11	2	0	0	7	86	0	0	0	0	0	0	0		0	0	0	0	0	0	2	1	0	0	0		0		0
9935	602	7	8	2008	3900	exit			0				farida	8	1	0	0	5	81	0	0	0	0	0	0	0		0	0	0	0	0	0	0	0	0	0	0		0		0
9951	602	8	8	2008	3900	exit			0				farida	18	0	0	0	30	109	0	0	0	0	0	0	0		0	0	0	0	0	0	1	1	0	1	0		0		0
9915	601	11	8	2008	3900	exit			0				farida	17	0	0	0	4	53	0	0	0	0	0	0	0		0	0	0	0	0	0	1	0	0	0	0		0		0
9924	601	12	8	2008	3900	exit			0				farida	15	0	0	0	3	58	0	0	0	0	0	0	0		0	0	0	0	0	0	0	0	0	0	0		0		0
9781	594	13	8	2008	3900	exit			0				farida	2	0	0	0	1	45	0	0	0	0	0	0	0		0	0	0	0	0	0	0	0	0	0	0		0		0
9789	594	14	8	2008	3900	exit			0				farida	12	0	0	0	2	92	1	0	0	0	0	0	0		0	0	0	0	0	0	1	0	0	0	0		0		0
11304	669	15	8	2008	3900	exit							farida	17	0	0	0	23	148	0	0	0	0	0	0	0		0	0	0	0	0	0	1	1	0	0	0		0		0
11308	669	18	8	2008	3900	exit							farida	12	0	0	0	0	55	0	0	0	0	0	0	0		0	0	0	0	0	0	0	0	0	0	0		0		0
11362	672	19	8	2008	3900	exit							farida	3	0	0	0	0	89	0	0	0	0	0	0	0		0	0	0	0	0	0	0	0	0	0	0		0		0
11381	673	20	8	2008	3900	exit							farida	3	0	0	0	3	66	0	0	0	0	0	0	0		0	0	0	0	0	0	0	0	0	0	0		0		0
11332	671	21	8	2008	3900	exit							farida	4	0	0	0	2	22	0	0	0	0	0	0	0		0	0	0	0	0	0	0	1	0	0	0		0		0
11343	671	22	8	2008	3900	exit							farida	2	0	0	0	1	3	0	0	0	0	0	0	1		0	0	0	0	0	0	0	0	0	0	0		0		0
11350	671	25	8	2008	3900	exit							farida	6	0	0	0	0	20	0	0	0	0	0	0	0		0	0	0	0	0	0	1	0	0	0	0		0		0
11326	670	26	8	2008	3900	exit							farida	13	0	0	0	5	265	0	0	0	0	0	0	0		0	0	0	0	0	0	0	0	0	0	0		0		0
11232	666	27	8	2008	3900	exit							farida	5	0	0	0	4	201	0	0	0	0	0	0	0		0	0	0	0	0	0	1	0	0	0	0		0		0
11248	666	28	8	2008	3900	exit							farida	14	0	0	0	4	210	0	0	0	0	0	0	0		0	0	0	0	0	0	0	1	0	0	0		0		0
11394	674	29	8	2008	3900	exit							farida	6	0	0	0	2	131	0	0	0	0	0	0	0		0	0	0	0	0	0	0	0	0	0	0		0		0
11012	655	1	7	2008	3900	exit			0				farida	13	0	0	0	4	61	0	0	0	0	0	0	0		0	0	0	0	0	0	0	0	0	0	0		0		0
11116	660	3	7	2008	3900	exit			0				farida	5	0	0	0	4	74	1	0	0	0	0	0	1		0	0	0	0	0	0	0	0	0	0	0		0		0
10055	608	7	7	2008	3900	exit			0				farida	11	0	0	0	6	52	0	0	0	0	0	0	0		0	0	0	0	0	0	0	0	0	0	0		0		0
10068	608	9	7	2008	3900	exit			0				farida	5	0	0	0	33	63	0	0	0	0	0	0	0		0	0	0	0	0	0	0	0	0	0	0		0		0
10077	609	10	7	2008	3900	exit			0				farida	1	0	0	0	1	67	0	0	0	0	0	0	0		0	0	0	0	0	0	0	0	0	0	0		0		0
10093	609	11	7	2008	3900	exit			0				farida	5	0	0	0	4	123	0	0	0	0	0	0	0		0	0	0	0	0	0	0	0	0	0	0		0		0
11070	658	14	7	2008	3900	exit			0				farida	5	0	0	0	1	39	0	0	0	0	0	0	0		0	0	0	0	0	0	0	0	0	0	0		0		0
11033	656	16	7	2008	3900	exit			0				farida	18	0	0	0	9	36	0	0	0	0	0	0	0		0	0	0	0	0	0	0	1	0	0	0		0		0
11037	656	17	7	2008	3900	exit			0				farida	7	0	0	0	3	33	0	0	0	0	0	0	0		0	0	0	0	0	0	0	0	0	0	0		0		0
11051	657	18	7	2008	3900	exit			0				farida	7	0	0	0	1	34	0	0	0	0	0	0	0		0	0	0	0	0	0	2	0	0	0	0		0		0
11059	657	21	7	2008	3900	exit			0				farida	14	0	0	0	4	72	0	0	0	0	0	0	0		0	0	0	0	0	0	0	0	0	0	0		0		0
10125	611	24	7	2008	3900	exit			0				farida	47	0	0	0	1	170	0	0	0	0	0	0	0		0	0	0	0	0	0	0	0	0	0	0		0		0
10139	612	25	7	2008	3900	exit			0				farida	11	0	0	0	5	93	0	0	0	0	0	0	0		0	0	0	0	0	0	1	0	0	0	0		0		0
11094	659	29	7	2008	3900	exit			0				farida	24	0	0	0	28	136	0	0	0	0	0	0	0		0	0	0	0	0	0	2	0	0	0	0		0		0
11105	659	30	7	2008	3900	exit			0				farida	33	0	0	0	0	148	0	0	0	0	0	0	1		0	0	0	0	0	0	3	1	0	0	0		0		0
9890	599	2	6	2008	3900	exit			0				farida	29	0	0	0	12	163	0	0	0	0	0	0	0		0	0	0	0	0	0	1	0	0	0	0		0		0
10955	652	3	6	2008	3900	exit			0				farida	19	0	0	0	7	131	0	0	0	0	0	0	0		0	0	0	0	0	0	0	0	0	0	0		0		0
10978	653	4	6	2008	3900	exit			0				farida	30	0	0	0	3	84	0	0	0	0	0	0	0		0	0	0	0	0	0	0	0	0	0	0		0		0
10985	653	5	6	2008	3900	exit			0				farida	28	0	0	0	3	98	0	0	0	0	0	0	0		0	0	0	0	0	0	0	1	0	0	0		0		0
9846	597	6	6	2008	3900	exit			0				farida	38	0	0	0	19	106	0	0	0	0	0	0	0		0	0	0	0	0	0	1	1	0	0	0		0		0
10045	607	9	6	2008	3900	exit			0				farida	16	0	0	0	0	39	0	0	0	0	0	0	0		0	0	0	0	0	0	0	0	0	0	0		0		0
9907	600	11	6	2008	3900	exit			0				farida	15	0	0	0	3	79	0	0	0	0	0	0	0		0	0	0	0	0	0	1	0	0	0	0		0		0
9859	598	12	6	2008	3900	exit			0				farida	15	0	0	0	11	32	0	0	0	0	0	0	0		0	0	0	0	0	0	1	0	0	0	0		0		0
9869	598	13	6	2008	3900	exit			0				farida	23	0	0	0	14	36	0	0	0	0	0	0	0		0	0	0	0	0	0	0	0	0	0	0		0		0
10227	615	16	6	2008	3900	exit			0				farida	13	0	0	0	1	72	0	0	0	0	0	0	0		0	0	0	0	0	0	0	3	0	0	0		0		0
10232	615	17	6	2008	3900	exit			0				farida	7	0	0	1	1	48	0	0	0	0	0	0	0		0	0	0	0	0	0	0	0	0	0	0		0		0
10212	615	18	6	2008	3900	exit			0				farida	1	0	0	0	1	33	0	0	0	0	0	0	0		0	0	0	0	0	0	0	0	0	0	0		0		0
11183	663	19	6	2008	3900	exit			0				farida	6	0	0	0	2	97	0	0	0	0	0	0	0		0	0	0	0	0	0	0	0	0	0	0		0		0
9995	605	20	6	2008	3900	exit			0				farida	6	0	0	0	0	49	0	0	0	0	0	0	0		0	0	0	0	0	0	0	2	0	0	0		0		0
9999	605	23	6	2008	3900	exit			0				farida	3	0	0	0	1	46	0	0	0	0	0	0	0		0	0	0	0	0	0	0	0	0	0	0		0		0
10001	605	23	6	2008	3900	exit			0				juvencia	16	0	0	0	4	301	0	0	0	0	0	0	0		0	0	0	0	0	0	0	0	0	0	0		0		0
10007	605	30	6	2008	3900	exit			0				juvencia	15	0	0	0	7	139	0	0	0	0	0	0	0		0	0	0	0	0	0	1	1	0	0	0		0		0
10373	623	6	5	2008	3900	exit			0				farida	20	0	0	0	24	98	0	0	0	0	0	0	0		0	0	0	0	0	0	0	0	0	0	0		0		0
10361	622	7	5	2008	3900	exit			0				farida	13	0	0	0	25	130	0	0	0	0	0	0	0		0	0	0	0	0	0	0	1	0	0	0		0		0
10098	610	8	5	2008	3900	exit			0				farida	33	0	0	0	22	73	0	0	0	0	0	0	0		0	0	0	0	0	0	0	1	0	0	0		0		0
10317	620	12	5	2008	3900	exit			0				farida	18	0	0	0	12	105	0	0	0	0	0	0	0		0	0	0	0	0	0	0	0	0	0	0		0		0
10324	620	13	5	2008	3900	exit			0				farida	10	0	0	0	6	55	0	0	0	0	0	0	0		0	0	0	0	0	0	1	0	0	0	0		0		0
10653	637	15	5	2008	3900	exit			0				farida	26	0	0	0	3	104	0	0	0	0	0	0	0		0	0	0	0	0	0	0	0	0	0	0		0		0
10661	637	16	5	2008	3900	exit			0				farida	17	0	0	0	13	109	0	0	0	0	0	0	0		0	0	0	0	0	0	2	1	0	0	0		0		0
10998	654	20	5	2008	3900	exit			0				farida	5	0	0	0	1	5	0	0	0	0	0	0	0		0	0	0	0	0	0	0	0	0	0	0		0		0
11005	654	21	5	2008	3900	exit			0				farida	19	0	0	0	4	139	0	0	0	0	0	0	0		0	0	0	0	0	0	0	0	0	0	0		0		0
11002	654	21	5	2008	3900	exit			0				mariamo	16	0	0	0	15	40	0	0	0	0	0	0	0		0	0	0	0	0	0	0	0	0	0	0		0		0
10937	651	22	5	2008	3900	exit			0				farida	71	0	0	0	7	148	0	0	0	0	0	0	0		0	0	0	0	0	0	0	1	0	0	0		0		0
10946	651	23	5	2008	3900	exit			0				farida	47	0	0	0	9	127	0	0	0	0	0	0	0		0	0	0	0	0	0	0	0	0	0	0		0		0
10920	650	26	5	2008	3900	exit			0				farida	45	0	0	0	16	137	0	0	0	0	0	0	0		0	0	0	0	0	0	1	0	0	0	0		0		0
10300	619	29	5	2008	3900	exit			0				farida	36	0	0	0	26	144	0	0	0	0	0	0	0		0	0	0	0	0	0	0	0	0	0	0		0		0
9875	599	30	5	2008	3900	exit			0				farida	39	0	0	0	15	104	0	0	0	0	0	0	0		0	0	0	0	0	0	1	1	0	0	0		0		0
10897	649	1	4	2008	3900	exit			0				farida	1	0	0	0	11	20	0	0	0	0	0	0	0		0	0	0	0	0	0	1	1	0	0	0		0		0
10170	613	2	4	2008	3900	exit			0				farida	28	0	0	0	17	185	0	0	0	0	0	0	0		0	0	0	0	0	0	0	0	0	0	0		0		0
10904	649	2	4	2008	3900	exit			0				farida	3	0	0	0	4	30	0	0	0	0	0	0	0		0	0	0	0	0	0	0	0	0	0	0		0		0
10607	634	4	4	2008	3900	exit			0				farida	7	0	0	0	7	34	0	0	0	0	0	0	0		0	0	0	0	0	0	1	0	0	0	0		0		0
10575	633	8	4	2008	3900	exit			0				benilde	2	0	0	0	3	32	0	0	0	0	0	0	0		0	0	0	0	0	0	0	0	0	0	0		0		0
10855	647	10	4	2008	3900	exit			0				farida	19	0	0	0	4	20	0	0	0	0	0	0	0		0	0	0	0	0	0	1	0	0	0	0		0		0
10556	632	11	4	2008	3900	exit			0				farida	17	0	0	0	9	48	0	0	0	0	0	0	0		0	0	0	0	0	0	0	2	0	0	0		0		0
10568	632	12	4	2008	3900	exit			0				farida	8	0	0	0	5	48	0	0	0	0	0	0	0		0	0	0	0	0	0	0	0	0	0	0		0		0
10619	635	16	4	2008	3900	exit			0				farida	10	0	0	0	11	70	0	0	0	0	0	0	0		0	0	0	0	0	0	0	0	0	0	0		0		0
10394	624	17	4	2008	3900	exit			0				farida	8	0	0	0	5	30	0	0	0	0	0	0	0		0	0	0	0	0	0	1	0	0	0	0		0		0
10631	636	18	4	2008	3900	exit			0				farida	13	1	0	0	5	41	0	0	0	0	0	0	0		0	0	0	0	0	0	0	0	0	0	0		0		0
10646	636	21	4	2008	3900	exit			0				farida	4	0	0	0	1	226	0	0	0	0	0	0	0		0	0	0	0	0	0	0	0	0	0	0		0		0
10523	630	22	4	2008	3900	exit			0				farida	47	0	0	0	8	162	0	0	0	0	0	1	0		0	0	0	0	0	0	0	0	0	0	0		0		0
10491	629	23	4	2008	3900	exit			0				farida	55	0	0	0	18	188	0	0	0	0	0	0	0		0	0	0	0	0	0	0	0	0	0	0		0		0
10870	648	25	4	2008	3900	exit			0				farida	11	0	0	0	10	127	0	0	0	0	0	0	0		0	0	0	0	0	0	0	1	0	0	0		0		0
10887	648	28	4	2008	3900	exit			0				farida	19	0	0	0	7	87	0	0	0	0	0	0	0		0	0	0	0	0	0	0	1	0	0	0		0		0
10549	631	29	4	2008	3900	exit			0				farida	11	0	0	0	4	107	0	0	0	0	0	0	0		0	0	0	0	0	0	1	1	0	0	0		0		0
10159	613	30	4	2008	3900	exit			0				farida	31	0	0	0	8	100	0	0	0	0	0	0	0		0	0	0	0	0	0	1	0	0	0	0		0		0
10811	645	26	3	2008	3900	exit			0				farida	5	1	0	0	16	30	0	0	0	0	0	0	0		0	0	0	0	0	0	1	0	0	0	0		0		0
10817	645	27	3	2008	3900	exit			0				farida	3	0	0	0	3	23	0	0	0	0	0	0	6		0	0	10	0	0	0	2	0	0	0	0		0		0
10828	645	28	3	2008	3900	exit			0				farida	3	0	0	0	5	15	0	0	0	0	0	0	0		0	0	0	0	0	0	0	0	0	0	0		0		0
10840	646	31	3	2008	3900	exit			0				farida	6	0	0	0	7	28	0	0	0	0	0	0	0		0	0	0	0	0	0	0	0	0	0	0		0		0
11453	677	3	11	2008	3890	exit							beti	1	0	0	0	4	46	0	0	0	0	0	0	0		0	0	0	0	0	0	0	1	0	0	0		0		0
11461	677	4	11	2008	3890	exit							beti	2	0	0	0	2	103	0	0	0	0	0	0	0		0	0	0	0	0	0	1	0	0	0	0		0		0
11469	677	5	11	2008	3890	exit							beti	0	0	0	0	0	39	0	0	0	0	0	0	0		0	0	0	0	0	0	0	0	0	0	0		0		0
11415	675	6	11	2008	3890	exit							beti	0	0	0	0	1	20	0	0	0	0	0	0	0		0	0	0	0	0	0	0	0	0	0	0		0		0
11734	691	10	11	2008	3890	exit							tina	5	0	0	0	1	43	0	0	0	0	0	0	0		0	0	0	0	0	0	0	0	0	0	0		0		0
11742	691	11	11	2008	3890	exit							beti	1	0	0	0	11	16	0	0	0	0	0	0	0		0	0	0	0	0	0	0	0	0	0	0		0		0
11747	691	12	11	2008	3890	exit							beti	1	0	0	0	3	29	0	0	0	0	0	0	0		0	0	0	0	0	0	0	0	0	0	0		0		0
11722	690	13	11	2008	3890	exit							beti	1	0	0	0	1	43	0	0	0	0	0	0	0		0	0	0	0	0	0	0	0	0	0	0		0		0
11727	690	14	11	2008	3890	exit							amina	6	0	0	0	19	18	0	0	0	0	0	0	0		0	0	0	0	0	0	1	0	0	0	0		0		0
11697	689	17	11	2008	3890	exit							beti	1	0	0	0	56	61	0	0	0	0	0	0	0		0	0	0	0	0	0	0	0	0	0	0		0		0
11701	689	18	11	2008	3890	exit							beti	3	0	0	0	35	38	0	0	0	0	0	0	0		0	0	0	0	0	0	2	0	0	0	0		0		0
11709	689	19	11	2008	3890	exit							beti	5	0	0	0	29	52	0	0	0	0	0	0	0		0	0	0	0	0	0	1	0	0	0	0		0		0
11568	682	1	10	2008	3890	exit							beti	6	0	0	0	1	56	0	0	0	0	0	0	0		0	0	0	0	0	0	0	0	0	0	0		0		0
11595	684	2	10	2008	3890	exit							beti	6	0	0	0	5	46	0	0	0	0	0	0	0		0	0	0	0	0	0	0	0	0	0	0		0		0
11608	684	3	10	2008	3890	exit							beti	3	0	0	0	3	43	0	0	0	0	0	0	0		0	0	0	0	0	0	0	0	0	0	0		0		0
11617	685	6	10	2008	3890	exit							beti	2	0	0	0	2	19	0	0	0	0	0	0	0		0	0	1	0	0	0	0	0	0	0	0		0		0
11625	685	7	10	2008	3890	exit							beti	6	0	0	0	6	58	0	0	0	0	0	0	0		0	0	0	0	0	0	0	0	0	0	0		0		0
11515	680	8	10	2008	3890	exit							beti	6	0	0	0	8	26	0	0	0	0	0	0	0		0	0	0	0	0	0	0	1	0	0	0		0		0
11511	680	8	10	2008	3890	exit							farida	1	0	0	0	0	0	0	0	0	0	0	0	0		0	0	0	0	0	0	0	1	0	0	0		0		0
11522	680	9	10	2008	3890	exit							beti	1	0	0	0	3	22	0	0	0	0	0	0	0		0	0	0	0	0	0	0	0	0	0	0		0		0
11530	680	10	10	2008	3890	exit							beti	7	0	0	0	16	33	0	0	0	0	0	0	0		0	0	0	0	0	0	0	0	0	0	0		0		0
11679	688	24	10	2008	3890	exit							beti	3	0	0	0	8	90	0	0	0	0	0	0	0		0	0	0	0	0	0	0	0	0	0	0		0		0
11684	688	27	10	2008	3890	exit							beti	6	0	0	0	0	32	0	0	0	0	0	0	0		0	0	0	0	0	0	0	1	0	0	0		0		0
11433	676	28	10	2008	3890	exit							beti	5	0	0	0	8	44	0	0	0	0	0	0	0		0	0	0	0	0	0	0	0	0	0	0		0		0
11444	676	29	10	2008	3890	exit							beti	3	0	0	0	7	63	0	0	0	0	0	0	0		0	0	0	0	0	0	0	0	0	0	0		0		0
11474	678	30	10	2008	3890	exit							beti	1	0	0	0	7	43	0	0	0	0	0	0	0		0	0	0	0	0	0	0	0	0	0	0		0		0
11484	678	31	10	2008	3890	exit							beti	1	0	0	0	4	66	0	0	0	0	0	0	0		0	0	0	0	0	0	0	0	0	0	0		0		0
11275	668	2	9	2008	3890	exit							beti	8	0	0	0	0	2	0	0	0	0	0	0	0		0	0	0	0	0	0	0	0	0	0	0		0		0
11291	668	3	9	2008	3890	exit							beti	2	0	0	0	8	21	1	0	0	0	0	0	0		0	0	0	0	0	0	2	2	0	0	0		0		0
11255	667	4	9	2008	3890	exit							beti	6	0	0	0	2	50	0	0	0	0	1	0	0		0	0	0	0	0	0	0	0	0	0	0		0		0
11216	665	9	9	2008	3890	exit			0				beti	4	0	0	0	3	50	0	0	0	0	0	0	0		0	0	0	0	0	0	0	0	0	0	0		0		0
11223	665	12	9	2008	3890	exit			0				beti	7	0	0	0	6	49	0	0	0	0	0	0	0		0	0	0	0	0	0	1	0	0	0	0		0		0
11194	664	15	9	2008	3890	exit			0				beti	3	0	0	0	4	56	0	0	0	0	0	0	0		0	0	0	0	0	0	0	0	0	0	0		0		0
11198	664	16	9	2008	3890	exit			0				beti	11	0	0	0	2	38	0	0	0	0	0	0	0		0	0	0	0	0	0	1	2	0	0	0		0		0
11204	664	17	9	2008	3890	exit			0				beti	3	0	0	0	5	47	0	0	0	0	0	1	0		0	0	0	0	0	0	1	3	0	0	0		0		0
11576	683	18	9	2008	3890	exit							beti	1	0	0	0	3	39	0	0	0	0	0	0	0		0	0	0	0	0	0	0	0	0	0	0		0		0
11587	683	19	9	2008	3890	exit							beti	4	0	0	0	3	16	0	0	0	0	0	0	1male		0	0	0	0	0	0	0	0	0	0	0		0		0
11542	681	24	9	2008	3890	exit							beti	5	0	0	0	9	13	0	0	0	0	0	0	0		0	0	0	0	0	0	0	1	0	0	0		0		0
11547	681	26	9	2008	3890	exit							beti	3	0	0	0	4	36	0	0	0	0	0	0	0		0	0	0	0	0	0	0	0	2mrsh	0	0		0		0
11555	682	29	9	2008	3890	exit							beti	11	0	0	0	6	96	0	0	0	0	0	0	0		0	0	0	0	0	0	1	0	0	0	0		0		0
11565	682	30	9	2008	3890	exit							beti	3	0	0	0	3	37	0	0	0	0	0	0	0		0	0	0	0	0	0	0	0	0	0	0		0		0
10022	606	1	8	2008	3890	exit			0				beti	7	0	0	0	2	27	0	0	0	0	0	0	0		0	0	0	0	0	0	1	0	0	0	0		0		0
9990	604	5	8	2008	3890	exit			0				beti	7	0	0	0	2	20	0	0	0	0	0	0	0		0	0	0	0	0	0	0	0	0	0	0		0		0
9961	603	6	8	2008	3890	exit			0				beti	9	0	0	0	1	52	0	0	0	0	0	0	0		0	0	0	0	0	0	0	0	0	0	0		0		0
9975	603	7	8	2008	3890	exit			0				beti	5	0	0	0	3	35	0	0	0	0	0	0	0		0	0	0	0	0	0	0	0	0	0	0		0		0
9944	602	8	8	2008	3890	exit			0				beti	12	0	0	0	3	38	0	0	0	0	0	0	0		0	0	0	0	0	0	0	0	0	0	0		0		0
9952	602	11	8	2008	3890	exit			0				beti	6	0	0	0	1	36	0	0	0	0	0	0	0		0	0	0	0	0	0	1	0	0	0	0		0		0
9930	601	12	8	2008	3890	exit			0				beti	4	0	0	0	3	62	0	0	0	0	0	0	0		0	0	0	0	0	0	0	0	0	0	0		0		0
9779	594	13	8	2008	3890	exit			0				beti	2	0	0	0	5	121	0	0	0	0	0	2	0		0	0	0	0	0	0	0	0	0	0	0		0		0
9794	594	14	8	2008	3890	exit			0				beti	17	0	0	0	0	50	1	0	0	0	0	0	0		0	0	0	0	0	0	1	0	0	0	0		0		0
11301	669	15	8	2008	3890	exit							beti	2	0	0	0	2	44	0	0	0	0	0	0	0		0	0	0	0	0	0	0	0	0	0	0		0		0
11310	669	18	8	2008	3890	exit							beti	11	1	0	0	1	43	0	0	0	0	0	0	0		0	0	0	0	0	0	0	0	0	0	0		0		0
11365	672	19	8	2008	3890	exit							beti	14	0	0	0	1	85	0	0	0	0	0	0	0		0	0	0	0	0	0	0	0	1aedes	0	0		0		0
11386	673	20	8	2008	3890	exit							beti	8	0	0	0	29	87	0	0	0	0	0	0	0		0	0	0	0	0	0	0	0	0	0	0		0		0
11374	673	20	8	2008	3890	exit							beti	11	0	0	0	22	85	0	0	0	0	0	0	0		0	0	0	0	0	0	0	0	0	0	0		0		0
11341	671	22	8	2008	3890	exit							beti	20	0	0	0	10	44	0	0	0	0	0	0	0		0	0	0	0	0	0	0	0	0	0	0		0		0
11320	670	26	8	2008	3890	exit							beti	10	0	0	0	1	105	0	0	0	0	0	0	0		0	0	0	0	0	0	0	0	0	0	0		0		0
11247	666	28	8	2008	3890	exit							beti	5	1	0	0	4	74	0	0	0	0	0	0	0		0	0	0	0	0	0	0	0	0	0	0		0		0
11400	674	29	8	2008	3890	exit							beti	1	0	0	0	9	62	0	0	0	0	0	0	0		0	0	0	0	0	0	0	0	0	0	0		0		0
10031	606	4	7	2008	3890	exit			0				beti	16	0	0	0	1	8	0	0	0	0	0	0	0		0	0	0	0	0	0	0	0	0	0	0		0		0
10015	606	31	7	2008	3890	exit			0				beti	6	0	0	0	0	39	0	0	0	0	0	0	0		0	0	0	0	0	0	0	1	0	0	0		0		0
9893	599	2	6	2008	3890	exit			0				juvencia	1	0	0	0	0	40	0	0	0	0	0	0	0		0	0	0	0	0	0	0	0	0	0	0		0		0
10968	652	3	6	2008	3890	exit			0				juvencia	24	0	0	0	1	1	0	0	0	0	0	0	0		0	0	0	0	0	0	0	1	0	0	0		0		0
10961	652	3	6	2008	3890	exit			0				juvencia	6	0	0	0	0	59	0	0	0	0	0	0	0		0	0	0	0	0	0	0	0	0	0	0		0		0
10969	652	4	6	2008	3890	exit			0				juvencia	2	0	0	0	1	25	0	0	0	0	0	0	0		0	0	0	0	0	0	0	1	0	0	0		0		0
10986	653	5	6	2008	3890	exit			0				juvencia	6	0	0	0	3	51	0	0	0	0	0	0	0		0	0	0	0	0	0	1	0	0	0	0		0		0
10040	607	9	6	2008	3890	exit			0				juvencia	7	0	0	0	1	37	0	0	0	0	0	0	0		0	0	0	0	0	0	0	0	0	0	0		0		0
9903	600	11	6	2008	3890	exit			0				juvencia	9	0	0	0	0	31	0	0	0	0	0	0	0		0	0	0	0	0	0	0	0	0	0	0		0		0
9870	598	13	6	2008	3890	exit			0				juvencia	2	0	0	0	6	12	0	0	0	0	0	0	0		0	0	1	0	0	0	0	0	0	0	0		0		0
10224	615	16	6	2008	3890	exit			0				juvencia	4	0	0	0	0	13	0	0	0	0	0	0	0		0	0	0	0	1	0	0	2	0	0	0		0		0
10195	615	17	6	2008	3890	exit			0				juvencia	3	0	0	0	0	30	0	0	0	0	0	0	0		0	0	0	0	0	0	0	0	0	0	0		0		0
10211	615	18	6	2008	3890	exit			0				juvencia	3	0	0	0	3	24	0	0	0	0	0	0	0		0	0	0	0	0	0	0	1	0	0	0		0		0
11178	663	19	6	2008	3890	exit			0				juvencia	6	0	0	1	1	31	0	0	0	0	0	0	1		0	0	0	0	0	0	0	0	0	0	0		0		0
11187	663	20	6	2008	3890	exit			0				juvencia	16	0	0	0	0	49	0	0	0	0	0	0	0		0	0	0	0	0	0	1	0	0	0	0		0		0
10335	621	2	5	2008	3890	exit			0				juvencia	3	0	0	0	5	49	0	0	0	0	0	0	0		0	0	0	0	0	0	2	0	0	0	0		0		0
10341	621	5	5	2008	3890	exit			0				juvencia	1	0	0	0	20	43	0	0	0	0	0	0	0		0	0	1	0	0	0	0	0	0	0	0		0		0
10378	623	6	5	2008	3890	exit			0				juvencia	4	0	0	0	5	36	0	0	0	0	0	0	0		0	0	0	0	0	0	0	0	0	0	0		0		0
10355	622	7	5	2008	3890	exit			0				juvencia	2	0	0	0	1	48	0	0	0	0	0	0	0		0	0	0	0	0	0	2	0	0	0	0		0		0
10368	622	8	5	2008	3890	exit			0				juvencia	5	0	0	0	1	53	0	0	0	0	0	0	0		0	0	0	0	0	0	1	0	0	0	0		0		0
10110	610	9	5	2008	3890	exit			0				juvencia	2	0	0	0	6	38	0	0	0	0	0	0	0		0	0	0	0	0	0	4	0	0	0	0		0		0
10318	620	12	5	2008	3890	exit			0				juvencia	1	0	0	0	6	63	0	0	0	0	0	0	0		0	0	0	0	0	0	1	0	0	0	0		0		0
10283	618	14	5	2008	3890	exit			0				juvencia	2	0	0	0	8	59	0	0	0	0	0	0	0		0	0	0	0	0	0	1	1	1aede	0	0		0		0
10655	637	15	5	2008	3890	exit			0				juvencia	0	0	0	0	1	55	0	0	0	0	0	0	0		0	0	0	0	0	0	0	0	0	0	0		0		0
10664	637	16	5	2008	3890	exit			0				juvencia	9	0	0	0	6	66	0	0	0	0	0	0	0		0	0	0	0	0	0	0	0	0	0	0		0		0
10258	617	19	5	2008	3890	exit			0				juvencia	3	0	0	0	6	49	0	0	0	0	0	0	0		0	0	0	0	0	0	2	0	0	0	0		0		0
10994	654	20	5	2008	3890	exit			0				juvencia	3	0	0	0	3	32	0	0	0	0	0	0	0		0	0	0	0	0	0	1	0	0	0	0		0		0
10948	651	23	5	2008	3890	exit			0				juvencia	5	0	0	0	3	72	0	0	0	0	0	0	0		0	0	0	0	0	0	0	2	0	0	0		0		0
10923	650	26	5	2008	3890	exit			0				juvencia	5	0	0	0	0	60	0	0	0	0	0	0	0		0	0	0	0	0	0	1	0	0	0	0		0		0
10303	619	29	5	2008	3890	exit			0				juvencia	14	0	0	0	2	38	0	0	0	0	0	0	0		0	0	0	0	0	0	1	0	0	0	0		0		0
9879	599	30	5	2008	3890	exit			0				juvencia	5	0	0	0	0	38	0	0	0	0	0	0	0		0	0	0	0	0	1	0	0	0	0	0		0		0
10892	649	1	4	2008	3890	exit			0				juvencia	14	0	0	0	6	43	0	0	0	0	0	0	0		0	0	0	0	0	0	0	1	0	0	0		0		0
10593	634	2	4	2008	3890	exit			0				juvencia	10	0	0	0	7	43	0	0	0	0	0	0	0		0	0	0	0	0	0	1	1	0	0	0		0		0
10600	634	4	4	2008	3890	exit			0				juvencia	8	0	0	0	16	54	0	0	0	0	0	0	0		0	0	0	0	0	0	0	0	0	0	0		0		0
10576	633	8	4	2008	3890	exit			0				juvencia	22	0	0	0	16	62	0	0	0	0	0	0	0		0	0	0	0	0	0	0	1	0	0	0		0		0
10479	628	9	4	2008	3890	exit		0	b				feliz	8	0	0	0	0	40	0	0	0	0	0	0	0		0	0	0	0	0	0	2	0	0	0	0		0		0
10483	628	9	4	2008	3890	exit		0	porta				juvencia	3	0	0	0	0	53	0	0	0	0	0	0	0		0	0	0	0	0	0	0	2	0	0	0		0		0
10482	628	9	4	2008	3890	exit		0	a				tomas	2	0	0	0	0	7	0	0	0	0	0	0	0		0	0	1	0	0	0	4	0	0	0	0		0		0
10490	628	10	4	2008	3890	exit		1	b				feliz	5	0	0	0	2	26	0	0	0	0	0	0	0		0	0	0	0	0	0	2	0	0	0	0		0		0
10488	628	10	4	2008	3890	exit		1	porta				juvencia	1	0	0	0	0	14	0	0	0	0	0	0	0		0	0	0	0	0	0	0	0	0	0	0		0		0
10485	628	10	4	2008	3890	exit		1	a				tomas	0	0	0	0	1	5	0	0	0	0	0	0	0		0	0	0	0	0	0	1	0	0	0	0		0		0
10869	647	11	4	2008	3890	exit			0				juvencia	1	0	0	0	0	21	0	0	0	0	0	0	0		0	0	0	0	0	0	3	1	0	0	0		0		0
10236	616	14	4	2008	3890	exit		1	porta				tomas	0	0	0	0	0	12	0	0	0	0	0	0	0		0	0	0	0	0	0	0	0	0	0	0		0		0
10245	616	16	4	2008	3890	exit		0	b				antonio	2	0	0	0	0	18	0	0	0	0	0	0	0		0	0	2	0	0	0	1	0	0	0	0		0		0
10247	616	16	4	2008	3890	exit		0	porta				juvencia	10	0	0	0	2	34	0	0	0	0	0	0	0		0	0	0	0	0	0	1	2	0	0	0		0		0
10244	616	16	4	2008	3890	exit		0	a				np	1	0	0	0	1	0	0	0	0	0	0	0	0		0	0	0	0	0	0	0	1	0	0	0		0		0
10246	616	16	4	2008	3890	exit		0	a				tomas	1	0	0	0	0	6	0	0	0	0	0	0	0		0	0	0	0	0	0	0	0	0	0	0		0		0
10249	616	17	4	2008	3890	exit		1	b				feliz	2	0	0	0	0	10	0	0	0	0	0	0	0		0	0	0	0	0	0	1	2	0	0	0		0		0
10250	616	17	4	2008	3890	exit		1	porta				juvencia	6	0	0	0	0	27	0	0	0	0	0	0	0		0	0	0	0	0	0	0	2	0	0	0		0		0
10248	616	17	4	2008	3890	exit		1	a				tomas	0	0	0	0	0	3	0	0	0	0	0	0	0		0	0	0	0	0	0	0	0	0	0	0		0		0
10410	624	18	4	2008	3890	exit			0				feliz	1	0	0	0	0	101	0	0	0	0	0	0	0		0	0	0	0	0	0	0	1	0	0	0		0		0
10634	636	18	4	2008	3890	exit			0				juvencia	1	0	0	0	0	15	0	0	0	0	0	0	0		0	0	0	0	0	0	0	0	0	0	0		0		0
10647	636	21	4	2008	3890	exit			0				juvencia	3	0	0	0	4	28	0	0	0	0	0	0	0		0	0	0	0	0	0	1	0	0	0	0		0		0
10522	630	22	4	2008	3890	exit			0				juvencia	5	0	0	0	1	58	0	0	0	0	0	0	0		0	0	0	0	0	0	2	0	0	0	0		0		0
10497	629	23	4	2008	3890	exit			0				juvencia	6	0	0	0	16	39	0	0	0	0	0	0	0		0	0	0	0	0	0	0	0	0	0	0		0		0
10874	648	25	4	2008	3890	exit			0				juvencia	3	0	0	0	6	43	0	0	0	0	0	0	0		0	0	0	0	0	0	0	0	0	0	0		0		0
10533	631	28	4	2008	3890	exit			0				juvencia	3	0	0	0	1	25	0	0	0	0	0	0	0		0	0	1	0	0	0	3	2	0	0	0		0		0
10543	631	29	4	2008	3890	exit			0				juvencia	3	0	0	0	2	28	0	0	0	0	0	0	0		0	0	0	0	0	0	1	0	0	0	0		0		0
10163	613	30	4	2008	3890	exit			0				juvencia	4	0	0	0	2	48	0	0	0	0	0	0	0		0	0	0	0	0	0	0	0	0	0	0		0		0
10189	614	10	3	2008	3890	exit			0				efigenia	3	0	0	0	1	0	0	0	0	0	0	0	0		0	0	0	0	0	0	0	0	0	0	0		0		0
10766	642	11	3	2008	3890	exit			0				efigenia	5	0	0	0	0	11	0	0	0	0	0	0	0		0	0	0	0	0	0	1	0	0	0	0		0		0
10781	643	12	3	2008	3890	exit			0				efigenia	11	0	0	0	0	26	0	0	0	0	0	0	0		0	0	0	0	0	0	0	0	0	0	0		0		0
10793	644	13	3	2008	3890	exit			0				efigenia	2	0	0	0	4	19	0	0	0	0	0	0	0		0	0	0	0	0	0	1	0	0	0	0		0		0
10802	644	14	3	2008	3890	exit			0				efigenia	2	0	0	0	3	23	0	0	0	0	0	0	0		0	0	0	0	0	0	1	0	0	0	0		0		0
10737	641	17	3	2008	3890	exit			0				efigenia	9	0	0	0	1	39	0	0	0	0	0	0	0		0	0	0	0	0	0	0	0	0	0	0		0		0
10747	641	18	3	2008	3890	exit			0				juvencia	2	0	0	0	1	14	0	0	0	0	0	0	0		0	0	0	0	0	0	1	0	0	0	0		0		0
10721	640	19	3	2008	3890	exit			0				juvencia	12	0	0	0	4	22	0	0	0	0	0	0	0		0	0	0	0	0	0	1	0	0	0	0		0		0
10730	640	20	3	2008	3890	exit			0				juvencia	4	0	0	0	8	30	0	0	0	0	0	0	0		0	0	0	0	0	0	0	2	0	0	0		0		0
10698	639	25	3	2008	3890	exit			0				juvencia	5	0	0	0	13	40	0	0	0	0	1	0	0		0	0	0	0	0	0	2	0	0	0	0		0		0
10707	639	26	3	2008	3890	exit			0				juvencia	9	1	0	0	23	23	0	0	0	0	0	1	0		0	0	0	0	0	0	1	1	0	0	0		0		0
10815	645	27	3	2008	3890	exit			0				juvencia	6	0	0	0	3	23	0	0	0	0	0	0	0		0	0	0	0	0	0	0	0	0	0	0		0		0
10826	645	28	3	2008	3890	exit			0				juvencia	9	0	0	0	6	36	0	0	0	0	0	0	0		0	0	0	0	0	0	2	0	0	0	0		0		0
10844	646	31	3	2008	3890	exit			0				juvencia	7	0	0	0	4	52	0	0	0	0	0	0	0		0	0	0	0	0	0	0	0	0	0	0		0		0
11141	661	25	2	2008	3890	exit			0				efigenia	8	0	0	0	5	23	0	0	0	0	0	0	0		0	0	0	0	0	0	0	0	0	0	0		0		0
10758	642	26	2	2008	3890	exit			0				efigenia	12	0	0	0	21	19	0	0	0	0	0	0	0		0	0	0	0	0	0	1	0	0	0	0		0		0
11516	680	8	10	2008	3889	exit							pascoal	14	0	0	0	61	86	0	0	0	0	0	0	0		0	0	0	0	0	0	0	0	0	0	0		0		0
11122	660	4	7	2008	3889	exit			0				pascoal	9	0	0	0	4	166	0	0	0	0	0	0	0		0	0	0	0	0	0	0	0	0	0	0		0		0
10061	608	8	7	2008	3889	exit			0				farida	3	0	0	0	1	89	0	0	0	0	0	0	0		0	0	0	0	0	0	0	0	0	0	0		0		0
11080	658	15	7	2008	3889	exit			0				pascoal	1	0	0	0	0	7	0	0	0	0	0	0	0		0	0	0	0	0	0	0	0	0	0	0		0		0
11088	658	16	7	2008	3889	exit			0				pascoal	3	0	0	0	0	0	0	0	0	0	0	0	0		0	0	0	0	0	0	0	0	0	0	0		0		0
11039	656	17	7	2008	3889	exit			0				pascoal	6	0	0	0	0	32	0	0	0	0	0	0	0		0	0	0	0	0	0	0	0	0	0	0		0		0
11056	657	18	7	2008	3889	exit			0				pascoal	8	0	0	0	4	68	0	0	0	0	0	0	0		0	0	0	0	0	0	0	0	0	0	0		0		0
11069	657	22	7	2008	3889	exit			0				pascoal	7	0	0	0	3	201	0	0	0	0	0	0	0		0	0	0	0	0	0	0	0	0	0	0		0		0
10960	652	3	6	2008	3889	exit			0				pascoal	14	0	0	0	3	297	0	0	0	0	0	0	0		0	0	0	0	0	0	0	0	0	0	0		0		0
10972	653	4	6	2008	3889	exit			0				pascoal	27	0	0	0	2	145	0	0	0	0	0	1	0		0	0	0	0	0	0	0	0	0	0	0		0		0
10043	607	9	6	2008	3889	exit			0				pascoal	10	0	0	0	3	108	1	0	0	0	0	0	0		0	0	0	0	0	0	0	0	0	0	0		0		0
9909	600	11	6	2008	3889	exit			0				pascoal	19	0	0	0	5	113	1	0	0	0	0	0	0		0	0	0	0	0	0	1	0	0	0	0		0		0
9873	598	13	6	2008	3889	exit			0				pascoal	6	0	0	0	8	39	0	0	0	0	0	0	0		0	0	0	0	0	0	0	0	0	0	0		0		0
10225	615	16	6	2008	3889	exit			0				pascoal	18	0	0	0	0	48	0	0	0	0	0	0	0		0	0	0	0	0	0	2	0	0	0	0		0		0
10226	615	16	6	2008	3889	exit			0				simao	7	1	0	0	3	68	0	0	0	0	0	0	0		0	0	0	0	0	0	0	0	0	0	0		0		0
10204	615	17	6	2008	3889	exit			0				pascoal	7	0	0	0	1	150	0	0	0	0	0	0	0		0	0	0	0	0	0	0	0	0	0	0		0		0
10208	615	18	6	2008	3889	exit			0				pascoal	5	0	0	0	4	107	0	0	0	0	0	0	0		0	0	0	0	0	0	1	0	0	0	0		0		0
11180	663	19	6	2008	3889	exit			0				pascoal	21	0	0	0	17	81	0	0	0	0	0	0	0		0	0	0	0	0	0	0	0	0	0	0		0		0
11188	663	20	6	2008	3889	exit			0				pascoal	21	0	0	0	8	96	0	0	0	0	0	0	0		0	0	0	0	0	0	1	0	0	0	0		0		0
10000	605	23	6	2008	3889	exit			0				pascoal	4	0	0	0	6	218	0	0	0	0	0	0	0		0	0	0	0	0	0	0	0	0	0	0		0		0
10332	621	2	5	2008	3889	exit			0				pascoal	4	0	0	0	6	189	0	0	0	0	0	1	0		0	0	0	0	0	0	0	1	0	0	0		0		0
10345	621	5	5	2008	3889	exit			0				pascoal	9	0	0	0	20	279	0	0	0	0	0	0	0		0	0	0	0	0	0	0	0	0	0	0		0		0
10379	623	6	5	2008	3889	exit			0				pascoal	3	0	0	0	19	260	0	0	0	0	0	0	0		0	0	0	0	0	0	0	0	0	0	0		0		0
10358	622	7	5	2008	3889	exit			0				pascoal	2	0	0	0	5	96	0	0	0	0	0	0	0		0	0	0	0	0	0	0	0	0	0	0		0		0
10314	620	12	5	2008	3889	exit			0				pascoal	1	0	0	0	1	287	0	0	0	0	0	0	0		0	0	0	0	0	0	0	0	0	0	0		0		0
10320	620	13	5	2008	3889	exit			0				pascoal	4	0	0	0	7	228	0	0	0	0	0	0	0		0	0	0	0	0	0	0	0	0	0	0		0		0
10281	618	14	5	2008	3889	exit			0				pascoal	8	0	0	0	7	333	0	0	0	0	0	0	0		0	0	0	0	0	0	0	0	0	0	0		0		0
10992	654	20	5	2008	3889	exit			0				pascoal	9	0	0	0	9	202	0	0	0	0	0	0	0		0	0	0	0	0	0	1	0	0	0	0		0		0
10942	651	22	5	2008	3889	exit			0				pascoal	28	0	0	0	9	206	0	0	0	0	0	0	0		0	0	0	0	0	0	1	0	0	0	0		0		0
10913	650	23	5	2008	3889	exit			0				pascoal	8	0	0	0	0	3	0	0	0	0	0	0	0		0	0	0	0	0	0	0	0	0	0	0		0		0				atrazou???
10921	650	26	5	2008	3889	exit			0				pascoal	12	0	0	0	0	308	0	0	0	0	0	0	0		0	0	0	0	0	0	1	0	0	0	0		0		0
10929	650	27	5	2008	3889	exit			0				pascoal	18	0	0	0	8	232	0	0	0	0	0	0	0		0	0	0	0	0	0	1	0	0	0	0		0		0
9882	599	30	5	2008	3889	exit			0				pascoal	8	0	0	0	3	176	0	0	0	0	0	0	0		0	0	0	0	0	0	0	0	0	0	0		0		0
10599	634	4	4	2008	3889	exit			0				pascoal	2	0	0	0	1	150	0	0	0	0	0	0	0		0	0	0	0	0	0	0	0	0	0	0		0		0
10868	647	11	4	2008	3889	exit			0				pascoal	8	0	0	0	10	188	0	0	0	0	0	0	0		0	0	0	0	0	0	0	0	0	0	0		0		0
10645	636	21	4	2008	3889	exit			0				pascoal	7	0	0	0	4	249	0	0	0	0	0	0	0		0	0	0	0	0	0	0	0	0	0	0		0		0
10496	629	23	4	2008	3889	exit			0				pascoal	28	0	0	0	18	133	0	0	0	0	0	0	0		0	0	0	0	0	0	1	0	0	0	0		0		0
10878	648	25	4	2008	3889	exit			0				pascoal	3	0	0	0	48	73	0	0	0	0	0	0	0		0	0	0	0	0	0	0	0	0	0	0		0		0
10531	631	28	4	2008	3889	exit			0				pascoal	7	0	0	0	9	181	0	0	0	0	0	0	0		0	0	0	0	0	0	0	0	0	0	0		0		0
10548	631	29	4	2008	3889	exit			0				pascoal	8	0	0	0	4	200	0	0	0	0	0	0	0		0	0	0	0	0	0	0	0	0	0	0		0		0
10167	613	30	4	2008	3889	exit			0				pascoal	20	0	0	0	6	227	0	0	0	0	0	0	0		0	0	0	0	0	0	0	0	0	0	0		0		0
10770	642	11	3	2008	3889	exit			0				pascoal	10	0	0	0	2	66	0	0	0	0	0	0	0		0	0	0	0	0	0	0	0	0	0	0		0		0
10463	627	12	3	2008	3889	exit		1	a				benilde	0	0	0	0	0	0	0	0	0	0	0	0	0		0	0	0	0	0	0	0	0	0	0	0		0		0
10458	627	12	3	2008	3889	exit		1	porta				pascoal	17	0	0	0	1	56	0	0	0	0	0	0	0		0	0	0	0	0	0	0	0	0	0	0		0		0
10461	627	12	3	2008	3889	exit		1	b				simao	1	0	0	0	0	1	0	0	0	0	0	0	0		0	0	0	0	0	0	0	0	0	0	0		0		0
10459	627	12	3	2008	3889	exit		0	a				tomas	0	0	0	0	0	1	0	0	0	0	0	0	0		0	0	0	0	0	0	0	0	0	0	0		0		0
10465	627	13	3	2008	3889	exit		0	a				benilde	0	0	0	0	0	3	0	0	0	0	0	0	0		0	0	0	0	0	0	0	0	0	0	0		0		0
10466	627	13	3	2008	3889	exit		0	b				pascoal	0	0	0	0	0	7	0	0	0	0	0	0	0		0	0	0	0	0	0	0	0	0	0	0		0		0
10807	644	14	3	2008	3889	exit			0				pascoal	7	0	0	0	1	38	0	0	0	0	0	0	0		0	0	0	0	0	0	0	0	0	0	0		0		0
10412	625	17	3	2008	3889	exit		0	porta				pascoal	7	0	0	0	3	40	0	0	0	0	0	0	0		0	0	0	0	0	0	0	0	0	0	0		0		0
10469	627	17	3	2008	3889	exit		0	a				benilde	13	1	0	0	1	30	0	0	0	0	0	0	0		0	0	0	0	0	0	0	0	0	0	0		0		0
10470	627	17	3	2008	3889	exit		0	b				simao	3	0	0	0	1	15	0	0	0	0	0	0	0		0	0	1	0	0	0	1	0	0	0	0		0		0
10417	625	18	3	2008	3889	exit		1	a				benilde	1	0	0	0	0	4	0	0	0	0	0	0	0		0	0	0	0	0	0	0	1	0	0	0		0		0
10415	625	18	3	2008	3889	exit		1	porta				pascoal	5	0	0	0	1	36	0	0	0	0	0	0	0		0	0	0	0	0	0	0	0	0	0	0		0		0
10416	625	18	3	2008	3889	exit		1	b				simao	2	0	0	0	0	9	0	0	0	0	0	0	0		0	0	0	0	0	0	0	0	0	0	0		0		0
10421	625	19	3	2008	3889	exit		0	a				benilde	0	0	0	0	1	4	0	0	0	0	0	0	0		0	0	0	0	0	0	0	0	0	0	0		0		0
10420	625	19	3	2008	3889	exit		0	porta				pascoal	1	0	0	0	7	19	0	0	0	0	0	0	0		0	0	0	0	0	0	0	0	0	0	0		0		0
10419	625	19	3	2008	3889	exit		0	b				simao	1	0	0	0	0	3	0	0	0	0	0	0	0		0	0	0	0	0	0	0	0	0	0	0		0		0
10424	625	20	3	2008	3889	exit			porta				benilde	9	0	0	0	2	40	0	0	0	0	0	0	0		0	0	0	0	0	0	0	0	0	0	0		0		0
10427	625	20	3	2008	3889	exit			b				simao	2	0	0	0	0	5	0	0	0	0	0	0	0		0	0	0	0	0	0	0	0	0	0	0		0		0
10313	620	12	5	2008	3882	exit			0				benilde	9	0	0	0	8	107	0	0	0	0	0	0	0		0	0	0	0	0	0	0	0	0	0	0		0		0
11003	654	21	5	2008	3879	exit			0				feliz	26	1	0	0	9	42	0	0	0	0	0	1	0		0	0	0	0	0	0	0	1	0	0	0		0		0
10935	651	22	5	2008	3879	exit			0				feliz	10	0	0	0	3	40	0	0	0	0	0	0	0		0	0	0	0	0	0	1	0	0	0	0		0		0
10947	651	23	5	2008	3879	exit			0				feliz	9	0	0	0	4	109	1	0	0	0	1	0	0		0	0	0	0	0	0	0	0	0	0	0		0		0
10305	619	29	5	2008	3879	exit			0				feliz	15	0	0	0	1	62	0	0	0	0	0	0	0		0	0	0	0	0	0	0	1	0	0	0		0		0
10259	617	19	5	2008	3878	exit			0				feliz	4	0	0	0	3	134	0	0	0	0	0	1	0		0	0	0	0	0	0	1	0	0	0	0		0		0
11413	675	6	11	2008	3858	exit							mariamo	2	0	0	0	24	32	0	0	0	0	0	0	0		0	0	0	0	0	0	0	0	0	0	0		0		0
9989	604	5	8	2008	3858	exit			0				mariamo	13	0	0	0	2	38	0	0	0	0	0	0	0		0	0	0	0	0	0	0	0	0	0	0		0		0
	694	5	1	2009	3856	exit								6	0	0	0	2	25	0	0	0	0	0	0	0	0	0	0	0	0	0	0	0	2	0	0
	696	23	1	2009	3856	exit								1	0	0	0	0	12	0	0	0	0	0	0	0	0	0	0	0	0	0	0	2	0	0	0
	694	22	12	2008	3856	exit								10	0	0	0	17	63	0	0	0	0	0	1	0	0	0	0	0	0	0	0	0	0	0	0
11517	680	9	10	2008	3856	exit							mariamo	11	0	0	0	5	80	0	0	0	0	0	0	0		0	0	0	0	0	0	0	0	0	0	0		0		0
11526	680	10	10	2008	3856	exit							mariamo	28	0	0	0	10	98	0	0	0	0	0	1	0		0	0	0	0	0	0	3	1	0	0	0		0		0
11497	679	13	10	2008	3856	exit							mariamo	10	0	0	0	2	6	0	0	0	0	0	0	0		0	0	0	0	0	0	1	1	0	0	0		0		0
11505	679	14	10	2008	3856	exit							mariamo	4	0	0	0	1	14	0	0	0	0	0	0	0		0	0	0	0	0	0	0	0	1ruph	0	0		0		0
11631	686	15	10	2008	3856	exit							mariamo	4	0	0	0	0	44	0	0	0	0	0	0	0		0	0	0	0	0	0	0	0	0	0	0		0		0
10480	628	9	4	2008	3856	exit		1	a				benilde	0	0	0	0	0	9	0	0	0	0	0	1	0		0	0	7	0	0	0	2	0	0	0	0		0		0
10484	628	9	4	2008	3856	exit		1	b				np	1	0	0	0	0	4	0	0	0	0	0	0	0		0	0	0	0	0	0	0	0	0	0	0		0		0
10481	628	9	4	2008	3856	exit		1	porta				simao	1	0	0	0	0	6	0	0	0	0	0	0	0		0	0	0	0	0	0	1	0	0	0	0		0		0
10487	628	10	4	2008	3856	exit		0	a				benilde	0	0	0	0	0	1	0	0	0	0	0	0	0		0	0	0	0	0	0	0	0	0	0	0		0		0
10489	628	10	4	2008	3856	exit		0	porta				pascoal	0	0	0	0	0	11	0	0	0	0	0	1	0		0	0	1	0	0	0	0	0	0	0	0		0		0
10486	628	10	4	2008	3856	exit		0	b				simao	1	1	0	0	0	3	0	0	0	0	0	0	0		0	0	0	0	0	0	0	0	0	0	0		0		0
10237	616	14	4	2008	3856	exit		0	a				benilde	2	0	0	0	0	3	0	0	0	0	0	0	0		0	0	0	0	0	0	1	0	0	0	0		0		0
10235	616	14	4	2008	3856	exit		0	porta				np	13	0	0	0	0	25	0	0	0	0	0	0	0		0	0	0	0	0	0	2	0	0	0	0		0		0
10238	616	14	4	2008	3856	exit		0	b				simao	2	0	0	0	1	2	0	0	0	0	0	0	0		0	0	0	0	0	0	2	0	0	0	0		0		0
10241	616	15	4	2008	3856	exit		1	b				antonio	0	0	0	0	0	2	0	0	0	0	0	0	0		0	0	1	0	0	0	0	0	0	0	0		0		0
10239	616	15	4	2008	3856	exit		1	a				antonio	0	0	0	0	0	2	0	0	0	0	0	0	0		0	0	1	0	0	0	0	0	0	0	0		0		0
10240	616	15	4	2008	3856	exit		1	porta				np	1	0	0	0	0	3	0	0	0	0	0	0	0		0	0	0	0	0	0	0	0	0	0	0		0		0
10243	616	16	4	2008	3856	exit		0	porta				np	2	0	0	0	0	6	0	0	0	0	0	0	0		0	0	0	0	0	0	0	0	0	0	0		0		0
10242	616	16	4	2008	3856	exit		0	b				np	1	0	0	0	0	4	0	0	0	0	0	0	0		0	0	0	0	0	0	0	0	0	0	0		0		0
10391	624	17	4	2008	3856	exit			0				benilde	1	0	0	0	0	17	0	0	0	0	0	0	0		0	0	0	0	0	0	1	0	0	0	0		0		0
10765	642	11	3	2008	3856	exit			0				farida	6	0	0	0	0	8	0	0	0	0	0	0	0		0	0	0	0	0	0	0	0	0	0	0		0		0
10783	643	12	3	2008	3856	exit			0				farida	8	0	0	0	0	28	0	0	0	0	0	0	0		0	0	0	0	0	0	1	0	0	0	0		0		0
10794	644	13	3	2008	3856	exit			0				farida	1	0	0	0	0	30	0	0	0	0	0	0	0		0	0	2	0	0	0	1	0	0	0	0		0		0
10801	644	14	3	2008	3856	exit			0				farida	10	0	0	0	0	30	0	0	0	0	0	0	0		0	0	0	0	0	0	0	0	0	0	0		0		0
10740	641	17	3	2008	3856	exit			0				farida	14	0	0	0	0	38	0	0	0	0	0	0	0		0	0	0	0	0	0	1	0	0	0	0		0		0
11140	661	25	2	2008	3856	exit			0				farida	9	0	0	0	2	21	0	0	0	0	0	0	0		0	0	0	0	0	1	2	0	0	0	0		0		0
10762	642	26	2	2008	3856	exit			0				farida	7	0	0	0	0	46	0	0	0	0	0	0	0		0	0	1	0	0	0	1	0	0	0	0		0		0
10574	633	8	4	2008	3855	exit			0				farida	38	0	0	0	3	74	0	0	0	0	0	0	0		0	0	0	0	0	0	0	0	0	0	0		0		0
9009	555	25	10	2008	3852	exit			0				danilo	1	0	0	0	1	19	0	0	0	0	0	0	0		0	0	0	0	0	0	0	0	0	0	0		0		0
11280	668	2	9	2008	3852	exit							ricardina	1	0	0	1	1	28	0	0	0	0	0	0	0		0	0	0	0	0	0	0	0	0	0	0		0		0
11262	667	4	9	2008	3852	exit							ricardina	8	0	0	0	1	131	0	0	0	0	0	0	0		0	0	0	0	0	0	0	0	0	0	0		0		0
9992	604	5	8	2008	3852	exit			0				ricardina	2	0	0	0	0	10	0	0	0	0	0	0	0		0	0	0	0	0	0	0	0	0	0	0		0		0
9973	603	7	8	2008	3852	exit			0				ricardina	3	0	0	0	0	8	0	0	0	0	0	0	0		0	0	0	0	0	0	0	0	0	0	0		0		0
11307	669	18	8	2008	3852	exit							ricardina	2	0	0	0	2	10	0	0	0	0	0	0	0		0	0	0	0	0	0	0	0	0	0	0		0		0
11391	673	21	8	2008	3852	exit							ricardina	0	0	0	0	2	44	0	0	0	0	0	0	0		0	0	0	0	0	0	1	0	0	0	0		0		0
11315	670	25	8	2008	3852	exit							ricardina	1	0	0	0	0	14	0	0	0	0	0	0	0		0	0	6	0	0	0	0	0	0	0	0		0		0
11319	670	26	8	2008	3852	exit							ricardina	2	0	0	0	2	38	0	0	0	0	0	0	0		0	0	0	0	0	0	1	0	0	0	0		0		0
10032	606	4	7	2008	3852	exit			0				ricardina	5	0	0	0	8	58	0	0	0	0	0	0	0		0	0	0	0	0	0	0	0	0	0	0		0		0
10954	652	3	6	2008	3852	exit			0				ricardina	3	0	0	0	1	88	0	0	0	0	0	0	0		0	0	0	0	0	0	0	0	0	0	0		0		0
10971	653	4	6	2008	3852	exit			0				ricardina	3	0	0	0	1	7	0	0	0	0	0	0	0		0	0	0	0	0	0	0	0	0	0	0		0		0
9850	597	6	6	2008	3852	exit			0				ricardina	96	0	0	0	0	1	4	0	0	0	0	0	0		0	0	0	0	0	0	0	0	0	0	0		0		0
9853	597	9	6	2008	3852	exit			0				ricardina	1	0	0	0	4	101	0	0	0	0	0	0	0		0	0	0	0	0	0	0	0	0	0	0		0		0
10048	607	10	6	2008	3852	exit			0				ricardina	5	0	0	0	3	67	0	0	0	0	0	0	0		0	0	0	0	0	0	0	0	0	0	0		0		0
9899	600	11	6	2008	3852	exit			0				ricardina	1	0	0	0	5	109	0	0	0	0	0	0	0		0	0	0	0	0	0	0	0	0	0	0		0		0
10298	619	29	5	2008	3852	exit			0				ricardina	5	0	0	0	1	55	0	0	0	0	0	1	0		0	0	0	0	0	0	0	0	0	0	0		0		0
10546	631	29	4	2008	3852	exit			0				ricardina	4	0	0	0	0	54	0	0	0	0	0	0	0		0	0	0	0	0	0	0	0	0	0	0		0		0
9756	593	3	1	2008	3852	exit			0				dc	0	0	0	0	6	24	0	0	0	0	1	0	0		0	0	0	0	0	0	1	0	0	0	0		0		0
9498	580	3	12	2007	3852	exit			0				danilo	3	0	0	0	0	7	0	0	0	0	0	0	0		0	0	0	0	0	0	1	2	0	0	0		0		0
9510	580	5	12	2007	3852	exit			0				danilo	2	0	0	0	3	36	0	0	0	0	0	0	0		0	0	0	0	0	0	0	0	0	0	0		0		0
9563	583	7	12	2007	3852	exit			0				danilo	1	0	0	0	2	24	0	0	0	0	0	0	0		0	0	0	0	0	0	0	0	0	0	0		0		0
9113	560	6	11	2007	3852	exit			0				danilo	2	0	0	0	1	48	0	0	0	0	0	0	0		0	0	0	0	0	0	0	0	0	0	0		0		0
9470	578	12	11	2007	3852	exit			0				danilo	5	0	0	0	2	47	0	0	0	0	0	0	0		0	0	0	0	0	0	1	0	0	0	0		0		0
9682	589	13	11	2007	3852	exit			0				danilo	5	0	0	0	4	55	0	0	0	0	0	0	0		0	0	0	0	0	0	0	0	0	0	0		0		0
9635	587	16	11	2007	3852	exit			0				ricardina	8	0	0	0	0	72	0	0	0	0	0	0	0		0	0	24	0	1	0	3	1	0	0	0		0		0
9643	587	19	11	2007	3852	exit			0				danilo	0	0	0	0	1	32	0	0	0	0	0	0	0		0	0	0	0	0	0	0	0	0	0	0		0		0
9589	584	21	11	2007	3852	exit			0				danilo	3	0	0	0	2	37	0	0	0	0	0	0	0		0	0	0	0	0	0	0	0	0	0	0		0		0
9668	588	23	11	2007	3852	exit			0				abdul	2	0	0	0	0	37	0	0	0	0	0	0	0		0	0	0	0	0	0	1	0	0	0	0		0		0
9670	588	23	11	2007	3852	exit			0				danilo	0	0	0	0	1	22	0	0	0	0	0	0	0		0	0	0	0	0	0	0	0	0	0	0		0		0
9626	586	27	11	2007	3852	exit			0				danilo	0	0	0	0	0	49	0	0	0	0	0	0	0		0	0	0	0	0	0	0	0	0	0	0		0		0
9087	559	24	10	2007	3852	exit			0				danilo	20	0	0	0	2	64	0	0	0	0	0	0	0		0	0	0	0	0	0	0	0	0	0	0		0		0
9044	557	29	10	2007	3852	exit			0				danilo	3	0	0	0	2	90	0	0	0	0	0	0	0		0	0	0	0	0	0	0	0	0	0	0		0		0
9053	557	30	10	2007	3852	exit			0				danilo	9	0	0	0	0	84	0	0	0	0	0	0	0		0	0	0	0	0	0	0	0	0	0	0		0		0
10896	649	1	4	2008	3851	exit			0				feliz	0	0	0	0	0	90	0	0	0	0	0	0	0		0	0	0	0	0	0	0	0	0	0	0		0		0
9568	583	9	12	2007	3851	exit			0				abdul	4	0	0	0	23	42	0	0	0	0	0	0	0		0	0	0	0	0	0	1	2	0	0	0		0		0
9107	560	5	11	2007	3851	exit			0				abdul	22	1	0	0	140	49	0	0	0	0	0	0	0		0	0	0	0	0	0	0	0	0	0	0		0		0
9111	560	6	11	2007	3851	exit			0				abdul	16	2	0	0	119	47	0	0	0	0	0	0	0		0	0	0	0	0	0	2	0	0	0	0		0		0
9118	560	7	11	2007	3851	exit			0				abdul	9	0	0	0	34	28	0	0	0	0	0	0	0		0	0	0	0	0	0	0	1	0	0	0		0		0
9461	578	8	11	2007	3851	exit			0				abdul	15	0	0	0	24	99	0	0	0	0	0	0	0		0	0	0	0	0	0	0	0	0	0	0		0		0
9687	589	13	11	2007	3851	exit			0				abdul	10	0	0	0	43	58	0	0	0	0	0	0	0		0	0	0	0	0	0	1	0	0	0	0		0		0
9192	564	15	11	2007	3851	exit			0				abdul	7	0	0	0	14	78	0	0	0	0	0	0	0		0	0	0	0	0	0	0	0	0	0	0		0		0
9654	587	19	11	2007	3851	exit			0				abdul	0	0	0	0	30	29	0	0	0	0	0	0	0		0	0	0	0	0	0	0	0	0	0	0		0		0
9649	587	19	11	2007	3851	exit			0				abdul	3	0	0	0	30	27	0	0	0	0	0	1	0		0	0	0	0	0	0	1	0	0	0	0		0		0
9575	584	20	11	2007	3851	exit			0				abdul	5	0	0	0	27	4	0	0	0	0	0	0	0		0	0	0	0	0	0	0	0	0	0	0		0		0
9616	586	26	11	2007	3851	exit			0				abdul	3	0	0	0	4	42	0	0	0	0	0	0	0		0	0	0	0	0	0	0	1	0	0	0		0		0
9628	586	27	11	2007	3851	exit			0				abdul	0	0	0	0	13	51	0	0	0	0	0	0	0		0	0	0	0	0	0	3	2	0	0	0		0		0
9482	579	29	11	2007	3851	exit			0				abdul	10	0	0	0	16	56	0	0	0	0	0	0	0		0	0	0	0	0	0	2	0	0	0	0		0		0
9054	557	30	10	2007	3851	exit			0				abdul	8	0	0	0	35	92	0	0	0	0	0	0	0		0	0	0	0	0	0	0	1	0	0	0		0		0
8984	554	31	10	2007	3851	exit			0				abdul	34	1	0	0	23	61	0	0	0	0	0	0	0		0	0	0	0	0	0	2	0	0	0	0		0		0
	694	5	1	2009	3850	exit								7	0	0	0	3	10	0	0	0	0	0	0	0	0	0	0	0	0	0	0	0	0	0	0
	695	6	1	2009	3850	exit								7	0	0	0	30	30	0	0	0	0	0	0	0	0	0	0	0	0	0	0	0	0	0	0
	695	7	1	2009	3850	exit								3	0	0	0	17	19	0	0	0	0	0	0	0	0	0	0	0	0	0	0	0	0	0	0
	695	8	1	2009	3850	exit								1	0	0	0	28	16	0	0	0	0	0	0	0	0	0	0	0	0	0	0	0	0	0	0
	695	9	1	2009	3850	exit								2	0	0	0	24	15	0	0	0	0	0	0	0	0	0	0	0	0	0	0	0	0	0	0
	695	12	1	2009	3850	exit								7	0	0	0	20	16	0	0	0	0	2	0	0	0	0	0	0	0	0	0	2	0	0	0
	695	13	1	2009	3850	exit								0	1	0	0	9	10	0	0	0	0	0	0	0	0	0	1	0	0	0	0	1	0	0	0
	695	14	1	2009	3850	exit								3	0	0	0	14	15	0	0	0	0	0	0	0	0	0	1	0	0	0	0	0	0	0	0
	695	15	1	2009	3850	exit								1	0	0	0	8	16	0	0	0	0	0	0	0	0	0	0	0	0	0	0	0	0	0	0
	695	16	1	2009	3850	exit								3	0	0	0	1	17	0	0	0	0	0	0	0	0	1	0	0	0	0	0	0	1	0	0
	696	19	1	2009	3850	exit								2	0	0	0	10	15	0	0	0	0	1	0	0	0	0	0	0	0	0	0	3	1	0	0
	696	20	1	2009	3850	exit								0	0	0	0	11	7	0	0	0	0	0	2	0	0	0	0	0	0	0	1	0	2	0	0
	696	21	1	2009	3850	exit								2	0	0	0	3	9	0	0	0	0	0	0	0	0	0	0	0	0	0	0	0	0	0	0
	696	22	1	2009	3850	exit								3	0	0	0	26	10	3	0	0	0	0	0	0	0	0	0	0	0	0	0	0	0	0	0
	696	23	1	2009	3850	exit								0	0	0	0	40	6	0	0	0	0	0	0	0	0	0	0	0	0	0	0	2	0	0	0
	696	26	1	2009	3850	exit								2	0	0	0	2	6	0	0	0	0	0	3	0	0	0	0	0	0	0	0	0	0	0	0
	693	16	12	2008	3850	exit								6	0	0	0	1	60	0	0	0	0	0	0	0	0	0	0	0	0	0	0	1	0	0	0
	693	18	12	2008	3850	exit								4	0	0	0	37	28	2	0	0	0	0	2	0	0	0	0	0	0	0	0	0	0	0	0
	694	22	12	2008	3850	exit								6	0	0	0	13	68	0	0	0	0	0	0	0	0	0	0	0	0	0	0	0	0	0	0
11460	677	4	11	2008	3850	exit							mariamo	2	0	0	1	17	62	0	0	0	0	0	0	0		0	0	0	0	0	0	0	0	0	0	0		0		0
11470	677	5	11	2008	3850	exit							mariamo	3	0	0	0	18	26	0	0	0	0	0	0	0		0	0	0	0	0	0	0	0	0	0	0		0		0
11431	675	10	11	2008	3850	exit							mariamo	10	0	0	0	22	53	0	0	0	0	0	0	0		0	0	0	0	0	0	0	1	0	0	0		0		0
11738	691	11	11	2008	3850	exit							farida	13	0	0	0	94	66	0	0	0	0	0	0	0		0	0	0	0	0	0	3	0	0	0	0		0		0
11748	691	12	11	2008	3850	exit							farida	4	0	0	0	21	76	0	0	0	0	0	1	0		0	0	0	0	0	0	4	2	0	0	0		0		0
11718	690	13	11	2008	3850	exit							amina	6	0	0	0	31	114	0	0	0	0	0	0	0		0	0	0	0	0	0	0	2	0	0	0		0		0
11693	689	17	11	2008	3850	exit							amina	1	0	0	0	18	16	0	0	0	0	0	0	0		0	0	0	0	0	0	0	0	0	0	0		0		0
11699	689	18	11	2008	3850	exit							amina	5	0	0	0	30	60	0	0	0	0	0	0	0		0	0	0	0	0	0	1	0	0	0	0		0		0
11708	689	19	11	2008	3850	exit							tina	5	0	0	0	18	37	0	0	0	0	0	0	0		0	0	0	0	0	0	1	0	0	0	0		0		0
11596	684	2	10	2008	3850	exit							mariamo	31	1	0	0	8	82	0	0	0	0	0	1	0		0	0	0	0	0	0	0	0	0	0	0		0		0
11486	678	3	10	2008	3850	exit							mariamo	13	1	0	0	2	181	0	0	0	0	0	0	0		0	0	0	0	0	0	0	0	0	0	0		0		0
11613	685	6	10	2008	3850	exit							mariamo	4	1	0	0	1	17	0	0	0	0	0	0	0		0	0	0	0	0	0	0	0	0	0	0		0		0
11622	685	7	10	2008	3850	exit							mariamo	6	0	0	0	2	26	0	0	0	0	0	0	0		0	0	0	0	0	0	0	1	0	0	0		0		0
11628	685	8	10	2008	3850	exit							mariamo	7	0	0	0	4	46	0	0	0	0	0	0	0		0	0	0	0	0	0	2	1	0	0	0		0		0
11496	679	13	10	2008	3850	exit							beti	2	0	0	0	13	44	0	0	0	0	0	0	0		0	0	0	0	0	0	0	0	0	0	0		0		0
11637	686	15	10	2008	3850	exit							beti	4	0	0	0	25	54	0	0	0	0	0	0	0		0	0	0	0	0	0	1	0	0	0	0		0		0
11650	687	20	10	2008	3850	exit							beti	1	2	0	0	17	74	0	0	0	0	0	0	0		0	0	0	0	0	0	0	1	0	0	0		0		0
11666	687	22	10	2008	3850	exit							mariamo	7	0	0	0	10	18	0	0	0	0	0	0	0		0	0	0	2	0	0	0	0	0	0	0		0		0
11670	688	22	10	2008	3850	exit							beti	1	0	0	0	3	63	0	0	0	0	0	0	0		0	0	0	0	0	0	0	0	0	0	0		0		0
9008	555	25	10	2008	3850	exit			0				alima	3	0	0	0	5	28	0	0	0	0	0	0	0		0	0	0	0	0	0	0	0	0	0	0		0		0
11432	676	28	10	2008	3850	exit							mariamo	6	0	0	0	30	56	0	0	0	0	0	0	0		0	0	0	0	0	0	1	0	0	0	0		0		0
11443	676	29	10	2008	3850	exit							mariamo	4	0	0	0	6	96	0	0	0	0	0	0	0		0	0	0	0	0	0	0	0	0	0	0		0		0
11450	676	30	10	2008	3850	exit							mariamo	2	0	0	0	37	158	0	0	0	0	0	0	0		0	0	0	0	0	0	0	0	0	0	0		0		0
11483	678	31	10	2008	3850	exit							mariamo	3	0	0	0	18	44	0	0	0	0	0	0	0		0	0	0	0	0	0	0	0	0	0	0		0		0
11409	674	1	9	2008	3850	exit							mariamo	5	0	0	0	2	87	0	0	0	0	0	0	0		0	0	1	0	0	0	0	0	1	0	0		0		0
11286	668	3	9	2008	3850	exit							mariamo	8	0	0	0	5	46	0	0	1	0	0	0	0		0	0	1	0	0	0	2	5	0	0	0		0		0
11261	667	4	9	2008	3850	exit							mariamo	0	0	0	0	2	23	0	0	0	0	0	0	0		0	0	2	0	0	0	1	0	0	0	0		0		0
11217	665	9	9	2008	3850	exit			0				mariamo	8	0	0	0	4	109	0	0	0	0	0	0	0		0	0	0	0	0	0	0	0	0	0	0		0		0
11222	665	11	9	2008	3850	exit			0				mariamo	8	0	0	0	4	88	0	0	0	0	0	0	0		0	0	0	0	0	0	0	0	0	0	0		0		0
11227	665	12	9	2008	3850	exit							mariamo	6	0	0	0	2	38	0	0	0	0	0	1	1		0	0	0	0	0	0	0	0	0	0	0		0		0
11192	664	15	9	2008	3850	exit			0				mariamo	1	0	0	0	9	60	0	0	0	0	0	0	0		0	0	0	0	0	0	0	0	0	0	0		0		0
11197	664	16	9	2008	3850	exit			0				mariamo	1	0	0	0	6	23	0	0	0	0	0	0	0		0	0	0	0	0	0	1	0	0	0	0		0		0
11206	664	17	9	2008	3850	exit			0				mariamo	5	0	0	0	5	56	0	0	0	0	0	0	0		0	0	0	0	0	0	1	0	0	0	0		0		0
11574	683	18	9	2008	3850	exit							mariamo	9	0	0	0	3	49	0	0	0	0	0	0	0		0	0	0	0	0	0	1	1	0	0	0		0		0
11582	683	19	9	2008	3850	exit							mariamo	14	0	0	0	11	33	0	0	0	0	0	0	0		0	0	0	0	0	0	0	0	0	0	0		0		0
11591	683	22	9	2008	3850	exit							mariamo	22	0	0	0	0	43	0	0	0	0	0	0	0		0	0	0	0	0	0	0	0	0	0	0		0		0
11533	681	23	9	2008	3850	exit							mariamo	9	0	0	0	5	20	0	0	0	0	0	0	0		0	0	0	0	0	0	0	1	0	0	0		0		0
11548	681	26	9	2008	3850	exit							mariamo	9	0	0	0	3	62	0	0	0	0	0	0	0		0	0	0	0	0	0	0	0	0	0	0		0		0
9979	604	4	8	2008	3850	exit			0				mariamo	14	0	0	0	4	72	1	0	0	0	0	0	0		0	0	0	0	0	0	0	0	0	0	0		0		0
9968	603	6	8	2008	3850	exit			0				mariamo	7	0	0	0	4	40	0	0	0	0	0	0	0		0	0	0	0	0	0	0	0	0	0	0		0		0
9971	603	7	8	2008	3850	exit			0				mariamo	8	0	0	0	1	13	0	0	0	0	0	0	0		0	0	0	0	0	0	0	1	0	0	0		0		0
9917	601	11	8	2008	3850	exit			0				mariamo	9	0	0	0	3	16	0	0	0	0	0	0	0		0	0	0	0	0	0	0	0	0	0	0		0		0
9927	601	12	8	2008	3850	exit			0				mariamo	0	0	0	0	1	50	0	0	0	0	0	1	0		0	0	0	0	0	0	0	0	0	0	0		0		0
9778	594	13	8	2008	3850	exit			0				mariamo	7	0	0	0	21	67	0	0	0	0	0	1	0		0	0	0	0	0	0	0	0	1aesdes	0	0		0		0
9792	594	14	8	2008	3850	exit			0				mariamo	7	0	0	0	4	64	0	0	0	0	0	1	0		0	0	0	0	0	0	2	1	0	0	0		0		0
11300	669	15	8	2008	3850	exit							mariamo	0	0	0	0	2	51	0	0	0	0	0	1	0		0	0	0	0	0	0	2	0	0	0	0		0		0
11306	669	18	8	2008	3850	exit							mariamo	8	2	0	0	4	40	0	0	0	0	0	0	0		0	0	1	0	0	0	0	0	0	0	0		0		0
11368	672	19	8	2008	3850	exit							mariamo	3	0	0	0	1	19	0	0	0	0	0	0	0		0	0	0	0	0	0	0	0	0	0	0		0		0
11333	671	21	8	2008	3850	exit							mariamo	12	0	0	0	3	17	0	0	0	0	0	0	1		0	0	0	0	0	0	3	0	0	0	0		0		0
11342	671	22	8	2008	3850	exit							mariamo	12	0	0	0	0	37	0	0	0	0	0	0	0		0	0	0	0	0	0	0	0	0	0	0		0		0
11314	670	25	8	2008	3850	exit							mariamo	32	1	0	0	3	72	0	0	0	0	0	0	0		0	0	2	0	0	0	5	2	0	0	0		0		0
11324	670	26	8	2008	3850	exit							mariamo	7	1	0	0	8	162	0	0	0	0	0	0	0		0	0	0	0	0	0	1	0	0	0	0		0		0
11243	666	28	8	2008	3850	exit							mariamo	5	0	0	0	2	73	0	0	0	0	0	0	0		0	0	0	0	0	0	0	0	0	0	0		0		0
11395	674	29	8	2008	3850	exit							mariamo	8	0	0	0	6	119	0	0	0	0	0	0	0		0	0	0	0	0	0	1	0	0	0	0		0		0
11018	655	1	7	2008	3850	exit			0				mariamo	10	0	0	0	1	51	1	0	0	0	0	0	0		0	0	0	0	0	0	1	2	0	0	0		0		0
11110	660	3	7	2008	3850	exit			0				mariamo	10	0	0	0	10	66	0	0	0	0	0	0	0		0	0	0	0	0	0	1	0	0	0	0		0		0
11124	660	4	7	2008	3850	exit			0				mariamo	4	0	0	0	0	9	0	0	0	0	0	0	0		0	0	0	0	0	0	0	0	0	0	0		0		0
11128	660	7	7	2008	3850	exit			0				mariamo	8	0	0	0	3	19	0	0	0	0	0	0	0		0	0	0	0	0	0	0	0	0	0	0		0		0
10062	608	8	7	2008	3850	exit			0				mariamo	4	0	0	0	1	14	0	0	0	0	0	0	0		0	0	0	0	0	0	0	0	0	0	0		0		0
10071	608	9	7	2008	3850	exit			0				mariamo	33	0	0	0	5	138	0	0	0	0	0	0	0		0	0	1	0	0	0	0	0	0	0	0		0		0
10075	609	10	7	2008	3850	exit			0				mariamo	1	0	0	0	1	66	0	0	0	0	0	0	0		0	0	0	0	0	0	0	0	0	0	0		0		0
10091	609	11	7	2008	3850	exit			0				mariamo	4	0	0	0	6	131	0	0	0	0	0	0	0		0	0	0	0	0	0	0	0	0	0	0		0		0
11031	656	16	7	2008	3850	exit			0				mariamo	2	0	0	0	0	5	0	0	0	0	1	0	0		0	0	0	0	0	0	0	0	0	0	0		0		0
11042	656	17	7	2008	3850	exit			0				mariamo	3	0	0	0	10	38	0	0	0	0	0	0	0		0	0	0	0	0	0	0	0	0	0	0		0		0
11052	657	18	7	2008	3850	exit			0				mariamo	8	0	0	0	1	28	0	0	0	0	0	0	0		0	0	0	0	0	0	0	0	0	0	0		0		0
11048	656	21	7	2008	3850	exit			0				mariamo	2	0	0	0	12	22	0	0	0	0	0	0	0		0	0	0	0	0	0	0	0	0	0	0		0		0
11067	657	22	7	2008	3850	exit			0				mariamo	4	0	0	0	5	55	0	0	0	0	0	0	0		0	0	0	0	0	0	0	0	0	0	0		0		0
10117	611	23	7	2008	3850	exit			0				mariamo	9	0	0	0	1	27	0	0	0	0	0	0	0		0	0	0	0	0	0	1	1	0	0	0		0		0
10127	611	24	7	2008	3850	exit			0				mariamo	5	0	0	0	3	8	0	0	0	0	0	0	0		0	0	0	0	0	0	0	0	0	0	0		0		0
10135	612	25	7	2008	3850	exit			0				mariamo	13	0	0	0	2	98	0	0	0	0	0	0	0		0	0	0	0	0	0	0	1	0	0	0		0		0
10141	612	28	7	2008	3850	exit			0				mariamo	8	0	0	0	21	44	0	0	0	0	0	0	0		0	0	0	0	0	0	0	0	0	0	0		0		0
10154	612	29	7	2008	3850	exit			0				mariamo	2	0	0	0	3	4	0	0	0	0	0	0	0		0	0	0	0	0	0	0	0	0	0	0		0		0
11101	659	30	7	2008	3850	exit			0				mariamo	17	0	0	0	4	15	0	0	0	0	0	0	0		0	0	0	0	0	0	0	0	0	0	0		0		0
10018	606	31	7	2008	3850	exit			0				mariamo	3	0	0	0	8	48	0	0	0	0	0	0	0		0	0	0	0	0	0	0	0	0	0	0		0		0
9889	599	2	6	2008	3850	exit			0				mariamo	19	0	0	0	1	153	0	0	0	0	0	0	0		0	0	0	0	0	1	0	0	0	0	0		0		0
10963	652	3	6	2008	3850	exit			0				mariamo	20	0	0	0	6	122	0	0	0	0	0	0	0		0	0	0	0	0	0	0	2	0	0	0		0		0
10973	653	4	6	2008	3850	exit			0				mariamo	22	0	0	0	6	81	0	0	0	0	0	0	0		0	0	0	0	0	0	0	0	0	0	0		0		0
9839	597	5	6	2008	3850	exit			0				mariamo	12	0	0	0	8	73	0	0	0	0	0	0	0		0	0	0	0	0	0	0	1	0	0	0		0		0
9852	597	6	6	2008	3850	exit			0				mariamo	6	0	0	0	8	59	5	0	0	0	0	0	0		0	0	0	0	0	0	0	0	0	0	0		0		0
10041	607	9	6	2008	3850	exit			0				mariamo	10	0	0	0	1	68	0	0	0	0	0	0	0		0	0	0	0	0	0	1	0	0	0	0		0		0
9861	598	12	6	2008	3850	exit			0				mariamo	5	0	0	0	3	18	0	0	0	0	0	0	0		0	0	0	0	0	0	0	0	1aesdes	0	0		0		0
9872	598	13	6	2008	3850	exit			0				mariamo	2	0	0	0	10	12	0	0	0	0	0	0	0		0	0	0	0	0	0	0	0	0	0	0		0		0
10221	615	16	6	2008	3850	exit			0				mariamo	19	0	0	0	5	49	0	0	0	0	0	0	0		0	0	0	0	0	0	0	0	0	0	0		0		0
10233	615	17	6	2008	3850	exit			0				mariamo	5	0	0	0	6	43	0	0	0	0	0	0	0		0	0	0	0	0	0	0	0	0	0	0		0		0
10213	615	18	6	2008	3850	exit			0				mariamo	5	0	0	0	1	32	0	0	0	0	0	0	0		0	0	0	0	0	0	0	0	0	0	0		0		0
11179	663	19	6	2008	3850	exit			0				mariamo	8	0	0	0	4	58	0	0	0	0	0	0	0		0	0	0	0	0	0	0	0	0	0	0		0		0
10003	605	23	6	2008	3850	exit			0				mariamo	14	0	0	0	3	194	0	0	0	0	0	0	0		0	0	0	0	0	0	1	0	0	0	0		0		0
10009	605	30	6	2008	3850	exit			0				mariamo	12	0	0	0	4	94	0	0	0	0	0	0	0		0	0	0	0	0	0	0	0	0	0	0		0		0
10340	621	5	5	2008	3850	exit			0				mariamo	26	0	0	0	7	229	0	0	0	0	0	0	0		0	0	0	0	0	0	0	0	0	0	0		0		0
10377	623	6	5	2008	3850	exit			0				mariamo	13	0	0	0	7	163	0	0	0	0	0	0	0		0	0	2	0	0	0	2	0	0	0	0		0		0
10356	622	7	5	2008	3850	exit			0				mariamo	11	0	0	0	8	104	0	0	0	0	0	0	0		0	0	0	0	0	0	1	0	0	0	0		0		0
10109	610	9	5	2008	3850	exit			0				mariamo	15	0	0	0	0	119	0	0	0	0	0	0	0		0	0	0	0	0	0	1	1	0	0	0		0		0
10319	620	12	5	2008	3850	exit			0				mariamo	0	0	0	0	2	155	0	0	0	0	0	0	0		0	0	0	0	0	0	2	0	0	0	0		0		0
10325	620	13	5	2008	3850	exit			0				mariamo	1	0	0	0	6	217	0	0	0	0	0	0	0		0	0	0	0	0	0	0	0	0	0	0		0		0
10282	618	14	5	2008	3850	exit			0				mariamo	15	0	0	0	0	168	0	0	0	0	0	0	0		0	0	0	0	0	0	1	2	0	0	0		0		0
10289	618	15	5	2008	3850	exit			0				mariamo	24	0	0	0	1	125	0	0	0	0	0	0	0		0	0	0	0	0	0	1	1	0	0	0		0		0
10665	637	16	5	2008	3850	exit			0				mariamo	5	0	0	0	4	112	0	0	0	0	0	0	0		0	0	0	0	0	0	1	0	0	0	0		0		0
10255	617	19	5	2008	3850	exit			0				mariamo	26	0	0	0	1	121	0	0	0	0	0	0	0		0	0	0	0	0	0	0	0	0	0	0		0		0
10995	654	20	5	2008	3850	exit			0				mariamo	7	1	0	0	2	27	0	0	0	0	0	0	0		0	0	0	0	0	0	0	0	0	0	0		0		0
10938	651	22	5	2008	3850	exit			0				mariamo	31	0	0	0	0	40	0	0	0	0	0	0	0		0	0	0	0	0	0	0	4	0	0	0		0		0
10949	651	23	5	2008	3850	exit			0				mariamo	14	0	0	0	1	59	0	0	0	0	0	0	0		0	0	0	0	0	0	3	0	0	0	0		0		0
10917	650	26	5	2008	3850	exit			0				mariamo	17	0	0	0	19	123	0	0	0	0	0	0	0		0	0	0	0	0	0	0	1	0	0	0		0		0
10291	619	28	5	2008	3850	exit			0				mariamo	15	0	0	0	13	71	0	0	0	0	0	0	0		0	0	0	0	0	0	0	0	0	0	0		0		0
10304	619	29	5	2008	3850	exit			0				mariamo	19	0	0	0	11	64	0	0	0	0	0	0	0		0	0	0	0	0	0	0	0	0	0	0		0		0
9877	599	30	5	2008	3850	exit			0				mariamo	11	0	0	0	8	38	0	0	0	0	0	0	0		0	0	1	0	0	0	0	2aedes	0	0	0		0		0
10893	649	1	4	2008	3850	exit			0				mariamo	6	0	0	0	11	24	0	0	0	0	0	0	0		0	0	0	0	0	0	1	0	0	0	0		0		0
10173	613	2	4	2008	3850	exit			0				mariamo	14	0	0	0	11	90	0	0	0	0	0	0	0		0	0	0	0	0	0	0	0	0	0	0		0		0
10908	649	2	4	2008	3850	exit			0				mariamo	18	0	0	0	9	37	0	0	0	0	0	0	0		0	0	0	0	0	0	0	0	0	0	0		0		0
10604	634	4	4	2008	3850	exit			0				mariamo	16	0	0	0	6	22	0	0	0	0	0	0	0		0	0	0	0	0	0	0	0	0	0	0		0		0
10577	633	8	4	2008	3850	exit			0				mariamo	10	0	0	0	17	24	0	0	0	0	0	0	0		0	0	0	0	0	0	0	0	1aede	0	0		0		0
10853	647	9	4	2008	3850	exit			0				mariamo	10	0	0	0	23	86	0	0	0	0	0	0	0		0	0	0	0	0	0	0	0	0	0	0		0		0
10866	647	10	4	2008	3850	exit			0				mariamo	9	0	0	0	22	68	0	0	0	0	0	0	0		0	0	0	0	0	0	0	1	0	0	0		0		0
10553	632	11	4	2008	3850	exit			0				mariamo	6	0	0	0	11	38	0	0	0	0	0	0	0		0	0	0	0	0	0	1	1	0	0	0		0		0
10569	632	12	4	2008	3850	exit			0				mariamo	3	0	0	0	2	20	0	0	0	0	0	0	0		0	0	0	0	0	0	3	0	1aede	0	0		0		0
10622	635	16	4	2008	3850	exit			0				mariamo	40	0	0	0	18	58	0	0	0	0	0	0	0		0	0	0	0	0	0	1	0	0	0	0		0		0
10392	624	17	4	2008	3850	exit			0				mariamo	24	0	0	0	23	73	0	0	0	0	0	0	0		0	0	0	0	0	0	0	0	0	0	0		0		0
10639	636	18	4	2008	3850	exit			0				mariamo	19	0	0	0	13	68	0	0	0	0	0	0	0		0	0	0	0	0	0	0	0	0	0	0		0		0
10643	636	21	4	2008	3850	exit			0				mariamo	2	0	0	0	5	40	0	0	0	0	0	0	0		0	0	0	0	0	0	0	0	0	0	0		0		0
10516	630	22	4	2008	3850	exit			0				mariamo	24	1	0	0	1	132	0	0	0	0	0	0	0		0	0	0	0	0	0	0	0	0	0	0		0		0
10500	629	23	4	2008	3850	exit			0				blank	19	1	0	0	0	86	0	0	0	0	0	0	0		0	0	0	0	0	0	2	0	0	0	0		0		0
10879	648	25	4	2008	3850	exit			0				mariamo	5	0	0	0	24	56	0	0	0	0	0	0	0		0	0	0	0	0	0	0	0	0	0	0		0		0
10882	648	28	4	2008	3850	exit			0				mariamo	16	0	0	0	5	163	0	0	0	0	0	0	0		0	0	0	0	0	0	0	3	0	0	0		0		0
10540	631	29	4	2008	3850	exit			0				mariamo	17	0	0	0	10	76	0	0	0	0	0	0	0		0	0	0	0	0	0	0	0	0	0	0		0		0
10168	613	30	4	2008	3850	exit			0				mariamo	22	0	0	0	21	102	0	0	0	0	0	0	0		0	0	0	0	0	0	0	0	0	0	0		0		0
10769	642	11	3	2008	3850	exit			0				mariamo	11	0	0	0	14	13	0	0	0	0	0	0	0		0	0	0	0	0	0	1	0	0	0	0		0		0
10784	643	12	3	2008	3850	exit			0				mariamo	2	0	0	0	11	17	0	0	0	0	0	0	0		0	0	0	0	0	0	0	0	0	0	0		0		0
10796	644	13	3	2008	3850	exit			0				mariamo	8	0	0	0	7	10	0	0	0	0	0	0	0		0	0	0	0	0	0	0	0	0	0	0		0		0
10804	644	14	3	2008	3850	exit			0				mariamo	18	0	0	0	15	34	0	0	0	0	0	0	0		0	0	0	0	0	0	0	0	0	0	0		0		0
10808	644	17	3	2008	3850	exit			0				mariamo	9	0	0	0	10	15	0	0	0	0	0	0	0		0	0	1	0	0	0	0	0	0	0	0		0		0
10748	641	18	3	2008	3850	exit			0				mariamo	13	0	0	0	16	18	0	0	0	0	0	0	0		0	0	0	0	0	0	0	0	0	0	0		0		0
10717	640	19	3	2008	3850	exit			0				mariamo	8	0	0	0	12	33	0	0	0	0	0	1	0		0	0	0	0	0	0	0	1	0	0	0		0		0
10672	638	20	3	2008	3850	exit			0				mariamo	5	0	0	0	26	45	0	0	0	0	0	0	0		0	0	0	0	0	0	0	0	0	0	0		0		0
10677	638	21	3	2008	3850	exit			0				mariamo	10	0	0	0	27	8	0	0	0	0	0	0	0		0	0	0	0	0	0	1	0	0	0	0		0		0
10701	639	24	3	2008	3850	exit			0				mariamo	9	0	0	0	10	40	0	0	0	0	0	0	0		0	0	0	0	0	0	1	0	0	0	0		0		0
10697	639	25	3	2008	3850	exit			0				mariamo	6	0	0	0	22	34	0	0	0	0	0	1	0		0	0	0	0	0	0	1	0	0	0	0		0		0
10709	639	26	3	2008	3850	exit			0				mariamo	4	0	0	0	36	22	0	0	0	0	0	0	0		0	0	0	0	0	0	1	0	0	0	0		0		0
10814	645	27	3	2008	3850	exit			0				mariamo	10	0	0	0	6	17	0	0	0	0	0	0	0		0	0	0	0	0	0	1	0	0	0	0		0		0
10834	646	28	3	2008	3850	exit			0				mariamo	8	0	0	0	15	19	0	0	0	0	0	0	0		0	0	0	0	0	0	0	0	0	0	0		0		0
10843	646	31	3	2008	3850	exit			0				mariamo	6	0	0	0	13	54	0	0	0	0	0	1	0		0	0	0	0	0	0	0	0	0	0	0		0		0
10845	646	31	3	2008	3850	exit			0				ricardina	1	0	0	0	2	63	0	0	0	0	0	0	0		0	0	0	0	0	0	1	0	0	0	0		0		0
11137	661	25	2	2008	3850	exit			0				mariamo	7	0	0	0	2	19	0	0	0	0	0	0	0		0	0	0	0	0	0	0	0	0	0	0		0		0
9609	585	17	12	2007	3850	exit			0				imo	5	1	0	0	3	23	0	0	0	0	0	0	0		0	0	0	0	0	0	0	0	0	0	0		0		0
9112	560	6	11	2007	3850	exit			0				alima	6	0	0	0	16	124	0	0	0	0	0	0	0		0	0	0	0	0	0	1	0	0	0	0		0		0
9460	578	8	11	2007	3850	exit			0				alima	7	0	0	0	4	66	0	0	0	0	0	0	0		0	0	0	0	0	0	1	0	0	0	0		0		0
9468	578	9	11	2007	3850	exit			0				alima	1	0	0	0	6	0	0	0	0	0	0	0	0		0	0	0	0	0	0	1	0	0	0	0		0		0				atrazou
9472	578	12	11	2007	3850	exit			0				alima	4	0	0	0	6	3	0	0	0	0	0	0	0		0	0	1	0	0	0	0	1	0	0	0		0		0				atrazou
9689	589	13	11	2007	3850	exit			0				alima	9	0	0	0	22	15	0	0	0	0	0	0	0		0	0	0	0	0	0	0	0	0	0	0		0		0
9586	584	21	11	2007	3850	exit			0				alima	6	0	0	0	11	49	0	0	0	0	0	0	0		0	0	0	0	0	0	0	1	0	0	0		0		0
8892	549	1	10	2007	3850	exit			0				alima	15	0	0	0	1	103	0	0	0	0	0	0	0		0	0	0	0	0	0	0	1	0	0	0		0		0
8900	549	2	10	2007	3850	exit			0				alima	7	0	0	0	60	72	0	0	0	0	0	0	0		0	0	0	0	0	0	0	0	0	0	0		0		0
9126	561	3	10	2007	3850	exit			0				alima	4	0	0	0	6	41	0	0	0	0	0	0	0		0	0	0	0	0	0	0	0	0	0	0		0		0
9131	561	5	10	2007	3850	exit			0				blank	23	0	0	0	2	273	0	0	0	0	0	0	0		0	0	0	0	0	0	0	0	0	0	0		0		0
8957	552	9	10	2007	3850	exit			0				alima	11	1	0	0	30	85	0	0	0	0	0	0	0		0	0	0	0	0	0	0	0	0	0	0		0		0
8867	548	10	10	2007	3850	exit			0				alima	4	0	0	0	21	33	0	0	0	0	0	0	0		0	0	0	0	0	0	0	0	0	0	0		0		0
8979	553	15	10	2007	3850	exit			0				alima	8	0	0	0	7	77	0	0	0	0	0	0	0		0	0	0	0	0	0	1	0	0	0	0		0		0
8926	551	17	10	2007	3850	exit			0				alima	17	0	0	0	25	3	0	0	0	0	0	0	0		0	0	0	0	0	0	1	0	0	0	0		0		0				atrazou
8943	551	18	10	2007	3850	exit			0				alima	3	0	0	0	15	17	0	0	0	0	0	0	0		0	0	0	0	0	0	0	0	0	0	0		0		0
9036	556	19	10	2007	3850	exit			0				alima	3	0	0	0	23	108	0	0	0	0	0	0	0		0	0	0	0	0	0	1	0	0	0	0		0		0
9040	556	22	10	2007	3850	exit			0				alima	4	0	0	0	16	20	0	0	0	0	0	0	0		0	0	0	0	0	0	0	0	0	0	0		0		0
9088	559	24	10	2007	3850	exit			0				alima	3	0	0	0	8	54	0	0	0	0	0	0	0		0	0	0	0	0	0	1	0	0	0	0		0		0
9023	555	29	10	2007	3850	exit			0				alima	2	0	0	0	10	72	0	0	0	0	0	0	0		0	0	0	0	0	0	0	0	0	0	0		0		0
9063	557	30	10	2007	3850	exit			0				alima	8	0	0	0	21	49	0	0	0	0	0	0	0		0	0	0	0	0	0	0	0	0	0	0		0		0
9055	557	30	10	2007	3850	exit			0				alima	1	0	0	0	3	40	0	0	0	0	0	0	0		0	0	0	0	0	0	0	0	0	0	0		0		0
8812	545	3	9	2007	3850	exit			0				alima	29	0	0	0	8	167	0	0	0	0	0	0	0		0	0	0	0	0	0	0	0	0	0	0		0		0
8822	545	4	9	2007	3850	exit			0				alima	13	0	0	0	2	144	0	0	0	0	0	0	0		0	0	0	0	0	0	0	0	0	0	0		0		0
8797	544	5	9	2007	3850	exit			0				alima	9	0	0	0	8	137	0	0	0	0	0	0	0		0	0	0	0	0	0	0	0	0	0	0		0		0
8767	541	12	9	2007	3850	exit			0				alima	11	0	0	0	9	103	0	0	0	0	0	0	0		0	0	0	0	0	0	1	0	0	0	0		0		0
8771	541	13	9	2007	3850	exit			0				alima	6	0	0	0	6	68	0	0	0	0	0	0	0		0	0	0	0	0	0	0	0	0	0	0		0		0
8783	541	17	9	2007	3850	exit			0				alima	3	0	0	0	3	55	0	0	0	0	0	0	0		0	0	0	0	0	0	0	0	0	0	0		0		0
8829	546	18	9	2007	3850	exit			0				alima	6	0	0	0	7	28	0	0	0	0	0	0	0		0	0	0	0	0	0	0	0	0	0	0		0		0
8836	546	19	9	2007	3850	exit			0				alima	2	0	0	0	4	18	0	0	0	0	0	0	0		0	0	0	0	0	0	2	0	0	0	0		0		0
8910	550	24	9	2007	3850	exit			0				alima	7	0	0	0	4	144	0	0	0	0	0	0	0		0	0	0	0	0	0	0	0	0	0	0		0		0
8918	550	27	9	2007	3850	exit			0				alima	1	0	0	0	7	53	0	0	0	0	0	0	0		0	0	0	0	0	0	0	0	0	0	0		0		0
9331	571	1	8	2007	3850	exit			0				alima	7	0	0	0	1	46	0	0	0	0	0	0	0		0	0	0	0	0	0	0	0	0	0	0		0		0
9276	569	6	8	2007	3850	exit			0				alima	6	0	0	0	0	128	0	0	0	0	0	0	0		0	0	0	0	0	0	0	0	0	0	0		0		0
9280	569	7	8	2007	3850	exit			0				blank	31	0	0	0	2	61	0	0	0	0	0	0	0		0	0	0	0	0	0	1	0	0	0	0		0		0
9291	569	8	8	2007	3850	exit			0				alima	8	0	0	0	5	63	0	0	0	0	0	0	0		0	0	0	0	0	0	0	0	0	0	0		0		0
9284	569	8	8	2007	3850	exit			0				alima	9	0	0	0	5	19	0	0	0	0	0	0	0		0	0	0	0	0	0	0	0	0	0	0		0		0
8748	540	13	8	2007	3850	exit			0				alima	14	0	0	0	1	74	0	0	0	0	0	0	0		0	0	0	0	0	0	1	3	0	0	0		0		0
8757	540	14	8	2007	3850	exit			0				alima	29	0	0	0	0	87	0	0	0	0	0	0	0		0	0	0	0	0	0	0	0	0	0	0		0		0
9195	565	15	8	2007	3850	exit			0				alima	46	0	0	0	3	173	0	0	0	0	0	0	0		0	0	0	0	0	0	0	0	0	0	0		0		0
9204	565	16	8	2007	3850	exit			0				alima	60	0	0	0	7	176	0	0	0	0	0	0	0		0	0	0	0	0	0	0	0	0	0	0		0		0
9211	565	17	8	2007	3850	exit			0				alima	19	0	0	0	4	18	0	0	0	0	0	0	0		0	0	0	0	0	0	0	0	0	0	0		0		0
9223	566	20	8	2007	3850	exit			0				alima	16	0	0	0	7	36	0	0	0	0	0	0	0		0	0	0	0	0	0	0	0	0	0	0		0		0
9224	566	21	8	2007	3850	exit			0				alima	11	0	0	0	4	85	0	0	0	0	0	0	0		0	0	0	0	0	0	0	0	0	0	0		0		0
9234	566	22	8	2007	3850	exit			0				alima	18	0	0	0	3	85	0	0	0	0	0	0	0		0	0	0	0	0	0	0	0	1aedes	0	0		0		0
9445	577	23	8	2007	3850	exit			0				alima	16	2	0	0	0	35	0	0	0	0	0	0	0		0	0	0	0	0	0	2	0	0	0	0		0		0
8724	539	24	8	2007	3850	exit			0				alima	15	0	0	0	1	56	0	0	0	0	0	0	0		0	0	0	0	0	0	0	0	0	0	0		0		0
8728	539	27	8	2007	3850	exit			0				alima	34	0	0	0	5	302	0	0	0	0	0	0	0		0	0	0	0	0	0	0	0	0	0	0		0		0
8743	539	28	8	2007	3850	exit			0				alima	8	0	0	0	10	93	0	0	0	0	0	0	0		0	0	0	0	0	0	0	0	0	0	0		0		0
8850	547	29	8	2007	3850	exit			0				alima	6	0	0	0	8	78	0	0	0	0	0	0	0		0	0	0	0	0	0	1	0	0	0	0		0		0
8854	547	30	8	2007	3850	exit			0				alima	10	0	0	0	9	64	0	0	0	0	0	0	0		0	0	0	0	0	0	0	0	0	0	0		0		0
8863	547	31	8	2007	3850	exit			0				alima	0	0	0	0	10	98	0	0	0	0	1	0	0		0	0	0	0	0	0	0	0	0	0	0		0		0
9270	568	2	7	2007	3850	exit			0				alima	4	0	0	0	0	28	0	0	0	0	0	0	0		0	0	0	0	0	0	0	0	0	0	0		0		0
9369	573	2	7	2007	3850	exit			0				alima	3	0	0	0	11	65	0	0	0	0	0	0	0		0	0	0	0	0	0	0	0	0	0	0		0		0
9239	567	3	7	2007	3850	exit			0				alima	8	0	0	0	6	41	0	0	0	0	0	0	0		0	0	0	0	0	0	0	0	1aedes	0	0		0		0
9242	567	4	7	2007	3850	exit			0				alima	9	0	0	0	9	82	0	0	0	0	0	0	0		0	0	0	0	0	0	0	0	1aedes sang	0	0		0		0
9249	567	5	7	2007	3850	exit			0				alima	1	0	0	0	7	69	0	0	0	0	0	0	0		0	0	0	0	0	0	0	0	0	0	0		0		0
9252	567	6	7	2007	3850	exit			0				alima	3	0	0	0	4	14	0	0	0	0	0	0	0		0	0	0	0	0	0	1	0	0	0	0		0		0
9698	590	9	7	2007	3850	exit			0				alima	3	0	0	0	1	25	0	0	0	0	0	0	0		0	0	0	0	0	0	0	0	0	0	0		0		0
9705	590	10	7	2007	3850	exit			0				alima	3	1	0	0	3	51	0	0	0	0	0	0	0		0	0	0	0	0	0	0	0	0	0	0		0		0
9709	590	11	7	2007	3850	exit			0				alima	3	0	0	0	4	49	0	0	0	0	0	0	0		0	0	0	0	0	0	0	0	0	0	0		0		0
9375	574	12	7	2007	3850	exit			0				alima	8	0	0	0	10	36	0	0	0	0	0	0	0		0	0	0	0	0	0	0	0	0	0	0		0		0
9385	574	16	7	2007	3850	exit			0				alima	11	0	0	0	5	28	0	0	0	0	0	0	0		0	0	0	0	0	0	0	0	0	0	0		0		0
8706	538	18	7	2007	3850	exit			0				halima	1	0	0	0	3	45	0	0	0	0	0	0	0		0	0	0	0	0	0	0	0	0	0	0		0		0
8716	538	20	7	2007	3850	exit			0				halima	9	0	0	0	7	133	0	0	0	0	0	0	0		0	0	0	0	0	0	0	0	0	0	0		0		0
8722	538	23	7	2007	3850	exit			0				halima	14	0	0	0	2	117	0	0	0	0	0	0	0		0	0	0	0	0	0	0	0	0	0	0		0		0
9307	570	25	7	2007	3850	exit			0				alima	4	0	0	0	4	53	0	0	0	0	0	0	0		0	0	0	0	0	0	0	0	0	0	0		0		0
9311	570	26	7	2007	3850	exit			0				alima	9	0	0	0	7	163	0	0	0	0	0	0	0		0	0	0	0	0	0	0	0	0	0	0		0		0
9260	568	27	7	2007	3850	exit			0				alima	27	0	0	0	2	96	0	0	0	0	0	0	0		0	0	0	0	0	0	0	0	0	0	0		0		0
9264	568	30	7	2007	3850	exit			0				alima	11	0	0	0	1	97	0	0	0	0	0	0	0		0	0	0	0	0	0	0	0	0	0	0		0		0
9340	572	8	6	2007	3850	exit			0				alima	5	0	0	0	11	21	0	0	0	0	0	0	0		0	0	0	0	0	0	0	0	0	0	0		0		0
9417	576	11	6	2007	3850	exit			0				alima	7	0	0	0	6	94	0	0	0	0	0	0	0		0	0	0	0	0	0	0	0	0	0	0		0		0
9425	576	12	6	2007	3850	exit			0				alima	8	0	0	0	3	55	0	0	0	0	0	0	0		0	0	0	0	0	0	0	1	0	0	0		0		0
9396	575	13	6	2007	3850	exit			0				alima	12	0	0	0	6	65	0	0	0	0	0	0	0		0	0	0	0	0	0	0	0	0	0	0		0		0
9406	575	14	6	2007	3850	exit			0				alima	1	0	0	0	5	33	0	0	0	0	0	0	0		0	0	0	0	0	0	0	1	0	0	0		0		0
9408	575	15	6	2007	3850	exit			0				alima	17	0	0	0	10	86	0	0	0	0	0	0	0		0	0	0	0	0	0	0	0	1aedes	0	0		0		0
9411	575	18	6	2007	3850	exit			0				alima	2	0	0	0	5	91	0	0	0	0	0	0	0		0	0	0	0	0	0	0	0	0	0	0		0		0
9349	572	20	6	2007	3850	exit			0				alima	8	1	0	0	8	79	0	0	0	0	0	0	0		0	0	0	0	0	0	0	0	0	0	0		0		0
9353	572	22	6	2007	3850	exit			0				alima	2	0	0	0	0	12	0	0	0	0	0	0	0		0	0	0	0	0	0	0	0	0	0	0		0		0
9356	573	27	6	2007	3850	exit			0				alima	3	0	0	0	3	61	0	0	0	0	0	0	0		0	0	0	0	0	0	0	0	0	0	0		0		0
9362	573	28	6	2007	3850	exit			0				alima	2	0	0	0	1	13	0	0	0	0	0	0	0		0	0	0	0	0	0	1	0	0	0	0		0		0
9364	573	29	6	2007	3850	exit			0				alima	4	0	0	0	2	57	0	0	0	0	0	0	0		0	0	0	0	0	0	0	0	0	0	0		0		0
8813	545	3	9	2007	3839	exit			0				danilo	22	0	0	0	0	3	0	0	0	0	0	0	0		0	0	0	0	0	0	0	0	0	0	0		0		0				ele atrazou
9435	577	22	8	2007	3839	exit			0				danilo	11	0	0	0	0	5	0	0	0	0	0	0	0		0	0	0	0	0	0	0	1	0	0	0		0		0
9441	577	23	8	2007	3839	exit			0				danilo	15	0	0	0	3	67	0	0	0	0	0	0	0		0	0	0	0	0	0	0	0	0	0	0		0		0
9243	567	4	7	2007	3839	exit			0				danilo	0	0	0	0	0	6	0	0	0	0	0	0	0		0	0	1	0	0	0	0	0	0	0	0		0		0
9262	a	25	4	2007	3838	exit						white	eduardo	2	0	0	1	3	0	0	0	0	0	0	0	0				0			0	0	1	0		0		0		0
	694	5	1	2009	3836	exit								1	0	0	0	2	6	0	0	0	0	0	0	0	0	0	0	0	0	0	0	1	0	0	0
10024	606	1	8	2008	3836	exit			0				isabel	1	0	0	0	4	19	0	0	0	0	0	0	0		0	0	0	0	0	0	0	0	0	0	0		0		0
9987	604	5	8	2008	3836	exit			0				isabel	5	0	0	0	0	10	0	0	0	0	0	0	1sang		0	0	0	0	0	0	0	0	0	0	0		0		0
10034	606	4	7	2008	3836	exit			0				isabel	6	0	0	0	7	25	0	0	0	0	0	0	0		0	0	0	0	0	0	0	0	0	0	0		0		0
9797	595	10	1	2008	3836	exit		0	b				antonio	2	0	0	0	0	5	0	0	0	0	0	0	0		0	0	0	0	0	0	1	2	0	0	0		0		0
9796	595	10	1	2008	3836	exit		0	a				ivete	2	0	0	0	0	6	0	0	0	0	0	0	0		0	0	0	0	0	0	2	1	0	0	0		0		0
9795	595	10	1	2008	3836	exit		0	porta				pascoal	1	0	0	0	0	8	0	0	0	0	0	0	1		0	0	0	0	0	0	1	1	0	0	0		0		0
9805	595	14	1	2008	3836	exit		0	b				antonio	0	0	0	0	0	1	0	0	0	0	0	0	0		0	0	0	0	0	0	0	0	0	0	0		0		0
9804	595	14	1	2008	3836	exit		0	a				ivete	2	0	0	0	4	4	0	0	0	0	0	0	0		0	0	0	0	0	0	2	6	0	0	0		0		0
9806	595	14	1	2008	3836	exit		0	porta				pascoal	0	0	0	0	1	1	0	0	0	0	0	0	0		0	0	0	0	0	0	4	2	0	0	0		0		0
9725	591	15	1	2008	3836	exit			0				rute	3	0	0	0	0	6	0	0	0	0	0	0	0		0	0	0	0	0	0	2	3	0	0	0		0		0
9814	595	18	1	2008	3836	exit		0	a				ivete	0	0	0	0	9	2	0	0	0	0	0	0	0		0	0	0	0	0	0	0	0	0	0	0		0		0
10209	a25	4	30	2007	3834	exit							ricardo	3	0	0	0	3	80	0	0	0	0	0	0	0				0			0	0	3	0
9698	z	4	17	2007	3834	exit						white	ricardina	0	0	0	0	1	35	0	0	0	0	0	0	0				0			0	3	0	0
9644	w	4	11	2007	3834	exit							eduardo	2	0	1	0	3	83	0	0	0	0	0	0	1				0			0	0	2	0
9201	565	16	8	2007	3834	exit			0				danilo	29	0	0	0	2	70	0	0	0	0	0	0	0		0	0	0	0	0	0	0	0	0	0	0		0		0
8730	539	27	8	2007	3834	exit			0				danilo	2	0	0	0	2	58	0	0	0	0	0	0	0		0	0	0	0	0	0	1	0	0	0	0		0		0
8741	539	28	8	2007	3834	exit			0				danilo	15	0	0	0	4	65	0	0	0	0	0	0	0		0	0	0	0	0	0	0	0	0	0	0		0		0
8848	547	29	8	2007	3834	exit			0				danilo	4	0	0	0	0	11	0	0	0	0	0	0	0		0	0	0	0	0	0	0	0	0	0	0		0		0
9238	567	3	7	2007	3834	exit			0				danilo	10	1	0	0	0	3	0	0	0	0	0	0	0		0	0	0	0	0	0	0	0	0	0	0		0		0
10278	a28	6	7	2007	3834	exit							danilo	5	0	0	0	0	105	0	0	0	0	0	0	0				0			0	0	0	0
9416	576	11	6	2007	3834	exit			0				danilo	6	0	0	0	2	33	0	0	0	0	0	0	0		0	0	1	0	0	0	0	0	0	0	0		0		0
9426	576	12	6	2007	3834	exit			0				danilo	4	0	0	0	0	17	0	0	0	0	0	0	0		0	0	0	0	0	0	1	0	0	0	0		0		0
9398	575	13	6	2007	3834	exit			0				danilo	2	1	0	0	0	4	0	0	0	0	0	0	0		0	0	1	0	0	0	0	1	0	0	0		0		0
9413	575	18	6	2007	3834	exit			0				danilo	2	0	0	0	1	45	0	0	0	0	0	0	0		0	0	0	0	0	0	0	0	0	0	0		0		0
10292	a29	6	5	2007	3834	exit							danilo	10	0	1	0	2	133	0	0	0	0	0	0	0				0			0	0	1	0
10285	a29	6	4	2007	3834	exit							danilo	9	0	0	0	3	114	0	0	0	0	0	0	0				0			0	0	0	0
	694	5	1	2009	3833	exit								5	0	0	0	0	27	0	0	0	0	0	1	0	0	0	0	0	0	0	0	2	0	0	0
	695	16	1	2009	3833	exit								2	0	0	0	0	19	0	0	0	0	0	0	0	0	0	0	0	0	0	0	2	1	0	0
	694	22	12	2008	3833	exit								4	0	0	0	2	43	0	0	0	0	0	0	0	0	0	0	0	0	0	0	0	0	0	0
11014	655	1	7	2008	3833	exit			0				fatima	1	0	0	0	0	42	0	0	0	0	0	0	0		0	0	1	0	0	0	0	0	0	0	0		0		0
10083	609	9	7	2008	3833	exit			0				fatima	4	0	0	0	0	37	0	0	0	0	0	0	0		0	0	0	0	0	0	0	0	0	0	0		0		0
10080	609	10	7	2008	3833	exit			0				fatima	2	0	0	0	1	46	0	0	0	0	0	0	0		0	0	0	0	0	0	0	0	0	0	0		0		0
9892	599	2	6	2008	3833	exit			0				fatima	0	0	0	0	0	109	0	0	0	0	0	0	0		0	0	0	0	0	1	1	0	0	0	0		0		0
10956	652	3	6	2008	3833	exit			0				fatima	0	0	0	0	0	54	0	0	0	0	0	0	0		0	0	0	0	0	0	0	0	0	0	0		0		0
10979	653	4	6	2008	3833	exit			0				fatima	4	0	0	0	0	87	0	0	0	0	0	0	0		0	0	0	0	0	0	0	0	0	0	0		0		0
10989	653	5	6	2008	3833	exit			0				fatima	0	0	0	0	0	56	0	0	0	0	0	0	0		0	0	0	0	0	0	0	0	0	0	0		0		0
9854	597	9	6	2008	3833	exit			0				fatima	0	0	0	0	0	30	0	0	0	0	0	0	0		0	0	0	0	0	0	0	0	0	0	0		0		0
9897	600	10	6	2008	3833	exit			0				fatima	1	0	0	0	1	44	0	0	0	0	0	0	0		0	0	0	0	0	0	0	0	0	0	0		0		0
10222	615	16	6	2008	3833	exit			0				fatima	3	0	0	0	0	77	0	0	0	0	0	0	0		0	0	0	0	0	0	0	0	0	0	0		0		0
10231	615	17	6	2008	3833	exit			0				fatima	1	0	0	0	0	49	0	0	0	0	0	0	0		0	0	0	0	0	0	0	0	0	0	0		0		0
10205	615	18	6	2008	3833	exit			0				fatima	1	0	0	0	0	21	0	0	0	0	0	0	0		0	0	0	0	0	0	0	0	0	0	0		0		0
10349	621	5	5	2008	3833	exit			0				fatima	3	0	0	0	0	13	0	0	0	0	0	0	0		0	0	0	0	0	0	0	0	0	0	0		0		0
10380	623	6	5	2008	3833	exit			0				fatima	2	0	0	0	0	52	0	0	0	0	0	0	0		0	0	0	0	0	0	1	0	0	0	0		0		0
10351	622	7	5	2008	3833	exit			0				fatima	2	0	0	0	1	4	0	0	0	0	0	0	0		0	0	0	0	0	0	0	0	0	0	0		0		0
10100	610	8	5	2008	3833	exit			0				fatima	1	0	0	0	1	5	0	0	0	0	0	0	0		0	0	0	0	0	0	0	0	0	0	0		0		0
10326	620	13	5	2008	3833	exit			0				fatima	0	0	0	0	0	121	0	0	0	0	0	0	0		0	0	0	0	1	0	0	0	0	0	0		0		0
10656	637	15	5	2008	3833	exit			0				fatima	0	0	0	0	0	31	0	0	0	0	0	0	0		0	0	0	0	0	0	0	0	0	0	0		0		0
10257	617	19	5	2008	3833	exit			0				fatima	1	0	0	0	1	78	0	0	0	0	0	0	0		0	0	0	0	0	0	0	0	0	0	0		0		0
10999	654	20	5	2008	3833	exit			0				fatima	1	0	0	0	0	60	0	0	0	0	0	0	0		0	0	0	0	0	0	0	0	0	0	0		0		0
10939	651	22	5	2008	3833	exit			0				fatima	9	0	0	0	0	51	0	0	0	0	0	0	0		0	0	0	0	0	0	0	0	0	0	0		0		0
10916	650	23	5	2008	3833	exit			0				fatima	1	0	0	0	2	46	0	0	0	0	0	0	0		0	0	0	0	0	0	0	0	0	0	0		0		0
10174	613	2	4	2008	3833	exit			0				fatima	1	0	0	0	0	50	0	0	0	0	0	0	0		0	0	0	0	0	0	0	0	1aede	0	0		0		0
10592	634	2	4	2008	3833	exit			0				fatima	1	0	0	0	0	2	0	0	0	0	0	0	0		0	0	0	0	0	0	0	0	0	0	0		0		0
10856	647	10	4	2008	3833	exit			0				fatima	3	0	0	0	0	56	0	0	0	0	0	0	0		0	0	0	0	0	0	0	2	0	0	0		0		0
10555	632	11	4	2008	3833	exit			0				fatima	7	0	0	0	1	59	0	0	0	0	0	0	0		0	0	0	0	0	0	1	0	0	0	0		0		0
10612	635	14	4	2008	3833	exit			0				fatima	1	0	0	0	0	54	0	0	0	0	0	0	0		0	0	0	0	0	0	0	0	0	0	0		0		0
10621	635	16	4	2008	3833	exit			0				fatima	0	0	0	0	0	61	0	0	0	0	0	0	0		0	0	0	0	0	0	0	0	0	0	0		0		0
10408	624	18	4	2008	3833	exit			0				fatima	2	0	0	0	0	80	0	0	0	0	0	0	0		0	0	0	0	0	0	2	0	0	0	0		0		0
10519	630	22	4	2008	3833	exit			0				fatima	1	0	0	0	1	45	0	0	0	0	0	0	0		0	0	0	0	0	0	0	0	0	0	0		0		0
10498	629	23	4	2008	3833	exit			0				feliz	1	0	0	0	7	126	0	0	0	0	0	0	0		0	0	0	0	0	0	1	0	0	0	0		0		0
10880	648	25	4	2008	3833	exit			0				feliz	6	0	0	0	1	72	0	0	0	0	0	0	0		0	0	0	0	0	0	0	0	0	0	0		0		0
10886	648	28	4	2008	3833	exit			0				fatima	1	0	0	0	1	76	0	0	0	0	0	0	0		0	0	0	0	0	0	0	0	0	0	0		0		0
10885	648	28	4	2008	3833	exit			0				tomas	22	0	0	0	6	98	0	0	0	0	0	0	0		0	0	1	0	0	0	17	8	0	0	0		0		0
10165	613	30	4	2008	3833	exit			0				fatima	2	0	0	0	1	49	0	0	0	0	0	0	0		0	0	0	0	0	0	0	0	0	0	0		0		0
10452	627	10	3	2008	3833	exit		1	porta				feliz	1	0	0	0	0	13	0	0	0	0	0	0	0		0	0	0	0	0	0	0	0	0	0	0		0		0
10453	627	10	3	2008	3833	exit		1	a				tomas	0	0	0	0	0	3	0	0	0	0	0	0	0		0	0	0	0	0	0	0	0	0	0	0		0		0
10456	627	11	3	2008	3833	exit		0	porta				feliz	4	0	0	0	0	16	0	0	0	0	0	0	0		0	0	0	0	0	0	0	0	0	0	0		0		0
10457	627	11	3	2008	3833	exit		0	a				tomas	0	0	0	0	0	7	0	0	0	0	0	0	0		0	0	0	0	0	0	0	0	0	0	0		0		0
10462	627	12	3	2008	3833	exit		0	b				antonio	0	0	0	0	0	0	0	0	0	0	0	0	0		0	0	0	0	0	0	0	0	0	0	0		0		0
10460	627	12	3	2008	3833	exit		0	porta				feliz	0	0	0	0	0	17	0	0	0	0	1	0	0		0	0	0	0	0	0	0	0	0	0	0		0		0
10464	627	13	3	2008	3833	exit		1	b				fatima	0	0	0	0	0	5	0	0	0	0	0	0	0		0	0	0	0	0	0	0	0	0	0	0		0		0
10468	627	13	3	2008	3833	exit		1	porta				feliz	3	0	0	0	1	21	0	0	0	0	0	0	0		0	0	0	0	0	0	0	0	0	0	0		0		0
10467	627	13	3	2008	3833	exit		1	a				tomas	0	0	0	0	0	0	0	0	0	0	0	0	0		0	0	0	0	0	0	0	0	0	0	0		0		0
10414	625	18	3	2008	3833	exit		0	b				fatima	0	0	0	0	0	4	0	0	0	0	0	0	0		0	0	1	0	0	0	0	0	0	0	0		0		0
10413	625	18	3	2008	3833	exit		0	a				tomas	3	0	0	0	0	10	0	0	0	0	0	0	0		0	0	0	0	0	0	0	0	0	0	0		0		0
10422	625	19	3	2008	3833	exit		1	b				fatima	0	0	0	0	0	2	0	0	0	0	0	0	0		0	0	0	0	0	0	0	0	0	0	0		0		0
10418	625	19	3	2008	3833	exit		1	porta				feliz	0	0	0	0	2	30	0	0	0	0	0	0	0		0	0	0	0	0	0	0	0	0	0	0		0		0
10423	625	19	3	2008	3833	exit		1	a				tomas	0	0	0	0	0	3	0	0	0	0	0	0	0		0	0	0	0	0	0	0	0	0	0	0		0		0
10426	625	20	3	2008	3833	exit			b				fatima	0	0	0	0	1	0	0	0	0	0	0	1	0		0	0	0	0	0	0	0	1	0	0	0		0		0
10425	625	20	3	2008	3833	exit			porta				feliz	2	0	0	0	2	10	0	0	0	0	0	0	0		0	0	0	0	0	0	0	0	0	0	0		0		0
10428	625	20	3	2008	3833	exit			a				tomas	0	0	0	0	0	0	0	0	0	0	0	0	0		0	0	0	0	0	0	0	0	0	0	0		0		0
10208	a25	4	30	2007	3833	exit							januario	3	0	0	0	3	48	0	0	0	0	0	0	0				0			0	0	1	0
10351	a32	5	30	2007	3833	exit							januario	8	0	2	0	17	54	0	0	0	0	0	0	0				0			0	0	0	0
9401	i	2	28	2007	3833	exit							januario	13	0	0	0	12	66	0	0	0	0	0	0	0				0			0	0	0	0
9612	u	3	28	2007	3833	exit							januario	11	0	2	0	54	50	1	0	0	0	0	0	0				0			0	0	0	1
9287	c	2	27	2007	3833	exit							januario	19	0	0	0	23	159	0	0	0	0	0	0	0				0			0	2	3	0		0		0		0
9312	d	2	26	2007	3833	exit							januario	30	0	0	0	5	137	1	0	0	0	0	0	0				0			0	0	0	0		0		0		0
9630	v	3	26	2007	3833	exit							januario	4	0	0	2	59	67	0	0	0	0	0	0	0				0			0	4	2	0
9563	s	2	24	2007	3833	exit							ricardina	3	0	0	0	0	22	0	0	0	0	0	0	0				0			0	2	0	0
9302	d	2	23	2007	3833	exit						white	eduardo	3	0	0	0	1	27	0	0	0	0	0	2	0				0			0	0	0	0		0		0		0
10585	a44	1	23	2007	3833	exit							nelson		0	0	0	2	16	0	0	0	0	0	0	0				0			0	1	0	0
9668	x	4	23	2007	3833	exit						white	eduardo	2	0	0	0	2	65	0	0	0	0	0	0	0				0			0	2	1	0
10529	a41	1	22	2007	3833	exit							nelson	2	0	0	0	2	32	0	0	0	0	0	2	0				0			0	0	1	0
9614	v	3	21	2007	3833	exit							januario	3	0	0	1	62	64	0	0	0	0	0	0	0				1			0	0	1	0
9317	e	2	20	2007	3833	exit							januario	4	0	0	0	4	73	0	0	0	0	0	0	0				0			0	1	0	0		0		0		0
9487	n	3	20	2007	3833	exit							januario	4	0	0	0	27	38	0	0	0	0	0	0	0				0			0	0	0	0
9700	z	4	17	2007	3833	exit							januario	3	0	1	0	4	102	0	0	0	0	0	0	0				0			0	2	0	1
9459	m	3	15	2007	3833	exit							januario	1	0	0	0	63	55	0	0	0	0	0	1	0				0			0	1	0	0
9551	r	2	14	2007	3833	exit						white	januario	2	0	0	0	2	58	0	0	0	0	0	0	0				0			0	0	1	0
9451	k	3	14	2007	3833	exit							januario	7	0	0	0	48	88	0	0	0	0	0	0	0				0			0	1	1	0
9439	k	3	13	2007	3833	exit							januario	4	0	0	0	93	68	0	0	0	0	0	0	0				0			0	2	1	0
9501	580	3	12	2007	3833	exit			0				januario	7	0	0	0	3	49	0	0	0	0	0	0	0		0	0	0	0	0	0	0	0	0	0	0		0		0
9541	582	11	12	2007	3833	exit			0				januario	7	0	0	0	1	56	0	0	0	0	0	0	0		0	0	0	0	0	0	1	3	0	0	0		0		0
9424	j	3	12	2007	3833	exit							januario	2	0	0	0	90	91	0	0	0	0	0	0	0				0			0	1	0	0
9473	578	12	11	2007	3833	exit			0				januario	13	0	0	0	12	135	0	0	0	0	0	0	0		0	0	0	0	0	0	1	1	0	0	0		0		0
9650	587	19	11	2007	3833	exit			0				januario	8	0	0	0	9	182	0	0	0	0	0	0	0		0	0	0	0	0	0	0	0	0	0	0		0		0
9579	584	20	11	2007	3833	exit			0				januario	6	0	0	0	12	77	0	0	0	0	0	0	0		0	0	0	0	0	0	1	1	0	0	0		0		0
9617	586	26	11	2007	3833	exit			0				januario	1	0	0	0	0	18	0	0	0	0	0	0	0		0	0	0	0	0	0	0	2	0	0	0		0		0
9627	586	27	11	2007	3833	exit			0				januario	1	0	0	0	7	38	0	0	0	0	0	0	0		0	0	0	0	0	0	3	3	0	0	0		0		0
8978	553	15	10	2007	3833	exit			0				januario	13	0	0	0	49	326	0	0	0	0	0	0	0		0	0	1	0	0	0	0	0	0	0	0		0		0
9027	556	18	10	2007	3833	exit			0				januario	4	0	0	0	1	180	0	0	0	0	0	0	0		0	0	0	0	0	0	2	0	0	0	0		0		0
9065	558	22	10	2007	3833	exit			0				januario	5	0	0	0	6	175	0	0	0	0	0	0	0		0	0	0	0	0	0	0	1	0	0	0		0		0
9078	558	23	10	2007	3833	exit			0				januario	17	0	0	0	3	261	0	0	0	0	0	0	0		0	0	0	0	0	0	0	0	0	0	0		0		0
9325	571	1	8	2007	3833	exit			0				januario	4	0	0	0	4	249	0	0	0	0	0	0	0		0	0	0	0	0	0	0	0	0	0	0		0		0
8750	540	13	8	2007	3833	exit			0				januario	6	0	0	0	3	288	0	0	0	0	0	0	0		0	0	0	0	0	0	1	0	0	0	0		0		0
10202	a24	5	8	2007	3833	exit							januario	15	0	0	0	20	42	0	0	0	0	0	0	0				0			0	0	0	0
9704	590	10	7	2007	3833	exit			0				januario	8	0	0	0	20	209	0	0	0	0	0	0	0		0	0	0	0	0	0	0	0	2aedes	0	0		0		0
9309	570	25	7	2007	3833	exit			0				januario	2	0	0	0	3	227	0	0	0	0	0	0	0		0	0	0	0	0	0	2	0	0	0	0		0		0
9316	571	30	7	2007	3833	exit			0				januario	6	0	0	0	3	454	0	0	0	0	0	0	0		0	0	0	0	0	0	0	0	0	0	0		0		0
10194	a24	5	7	2007	3833	exit							januario	11	0	0	2	1	46	0	0	0	0	0	0	0				0			0	0	0	0
9347	572	18	6	2007	3833	exit			0				januario	9	0	0	0	17	208	0	0	0	0	0	0	0		0	0	0	0	0	0	0	0	0	0	0		0		0
9343	f	2	6	2007	3833	exit						white	januario	9	0	0	0	4	95	0	0	0	0	0	1	0				0			0	0	0	0
9358	g	3	6	2007	3833	exit							januario	4	0	0	0	5	55	0	0	0	0	0	0	0				0			0	0	1	0
9679	y	4	6	2007	3833	exit							eduardo	2	0	0	0	1	89	0	0	0	0	0	0	0				0			0	1	2	0
10269	a28	6	6	2007	3833	exit							januario	12	2	0	0	50	187	0	0	0	0	0	0	0				0			0	0	0	0
9335	f	2	5	2007	3833	exit							januario	11	0	0	0	3	126	0	0	0	0	0	0	0				0			0	0	0	0		0		0		0
9386	h	3	5	2007	3833	exit							januario	9	0	0	0	3	79	0	0	0	0	0	0	0				0			0	0	0	0
10297	a29	6	5	2007	3833	exit							januario	29	0	5	0	38	316	0	0	0	0	0	0	0				0			0	0	1	0
9721	o	4	4	2007	3833	exit							januario	4	0	0	0	0	78	0	0	0	0	0	0	0				0			0	0	0	0
10284	a29	6	4	2007	3833	exit							januario	29	0	3	0	33	73	0	0	0	0	0	0	0				0			0	0	1	0
9714	o	4	3	2007	3833	exit						white	eduardo	2	0	0	1	2	82	0	0	0	0	0	0	0				0			0	0	0	0
10218	a25	5	3	2007	3833	exit							januario	2	0	0	0	0	48	0	0	0	0	0	0	0				0			0	0	5	0
9474	n	19	3	2007	3833	exit							januario	0	0	0	0	5	40	0	0	0	0	0	0	0				0			0	0	0	0
10347	a32	29	3	2007	3833	exit							januario	4	0	0	0	3	40	0	0	0	0	0	0	0				0			0	0	1	0
9589	t	4	2	2007	3833	exit						white	eduardo	0	0	0	0	2	99	0	0	0	0	0	0	0				0			0	1	0	0
10215	a25	5	2	2007	3833	exit							januario	3	0	0	0	3	102	0	0	0	0	0	0	0				0			0	0	1	0
9529	q	19	2	2007	3833	exit						white	januario	4	0	0	0	0	55	0	0	0	0	0	0	0				0			0	1	1	0
9584	t	3	30	2007	3832	exit							danilo	0	0	0	0	15	41	0	0	0	0	0	0	0				0			0	0	0	0
9611	u	3	28	2007	3832	exit							danilo	8	0	0	3	3	90	0	0	0	0	0	0	0				0			0	0	0	0
9282	c	2	27	2007	3832	exit							danilo	0	0	0	0	9	15	0	0	0	0	0	0	0				0			0	0	0	0		0		0		0
9603	u	3	27	2007	3832	exit							danilo	1	0	0	0	0	22	0	0	0	0	0	0	0				0			0	3	0	0
9311	d	2	26	2007	3832	exit							danilo	9	0	1	0	16	43	0	0	0	0	0	0	0				0			0	2	1	0		0		0		0
9595	u	3	26	2007	3832	exit							danilo	16	0	0	0	5	157	0	0	0	0	0	1	0				0			0	1	2	0
9570	s	2	25	2007	3832	exit							danilo	9	0	0	0	4	57	0	0	0	0	0	0	0				0			0	1	1	0
10364	a33	5	25	2007	3832	exit							danilo		0	0	0	1	3	0	0	0	0	0	0	0				0			0	0	1	0
9561	s	2	24	2007	3832	exit							danilo	2	0	0	0	0	75	0	0	0	0	0	0	0				0			0	1	2	0
10092	a19	5	24	2007	3832	exit							danilo	2	0	0	0	12	24	0	0	0	0	0	0	0				0			0	0	0	0
9624	v	3	23	2007	3832	exit							danilo	4	0	0	0	2	47	0	0	0	0	0	0	0				0			0	0	0	0
9669	x	4	23	2007	3832	exit						white	danilo	0	0	0	1	2	82	0	0	0	0	0	0	0				0			0	0	0	0
9621	v	3	22	2007	3832	exit							danilo	2	0	0	0	2	15	0	0	0	0	0	0	0				0			0	0	0	0
9326	e	2	21	2007	3832	exit							danilo	0	0	0	0	4	73	0	0	0	0	0	0	0				0			0	0	0	0		0		0		0
9480	n	3	20	2007	3832	exit							danilo	0	0	0	0	1	47	0	0	0	0	0	0	0				0			0	1	0	0
9491	n	3	20	2007	3832	exit							danilo	4	0	0	0	7	36	0	0	0	0	0	0	0				0			0	1	1	0
10517	a40	1	18	2007	3832	exit							cf	1	0	11	0	18	4	0	0	0	0	0	0	0				0			0	0	0	0
10544	a42	1	18	2007	3832	exit						branco	ricardo	15	0	1	0	120	86	0	0	0	0	3	1	0				0			0	4	4	0
9655	x	4	18	2007	3832	exit							danilo	5	0	0	0	14	66	0	0	0	0	0	0	0				0			0	3	3	1
9472	m	3	17	2007	3832	exit							danilo	1	0	0	0	2	15	0	0	0	0	0	0	0				0			0	0	0	0
9465	m	3	16	2007	3832	exit							danilo	11	0	1	0	3	94	0	0	0	0	0	1	0				0			0	1	0	0
10383	a34	5	16	2007	3832	exit							danilo	16	0	0	1	2	230	0	0	0	0	0	0	0				0			0	0	0	0
9521	q	2	15	2007	3832	exit							danilo	1	0	0	0	29	76	0	0	0	0	0	1	0				0			0	1	1	0
9457	m	3	15	2007	3832	exit							danilo	3	0	0	0	3	31	0	0	0	0	0	0	0				0			0	0	0	0
10256	a27	5	15	2007	3832	exit							danilo	1	0	0	0	7	49	0	0	0	0	0	0	0				0			0	0	1	0
9553	r	2	14	2007	3832	exit							danilo	1	0	0	0	2	70	0	0	0	0	0	0	0				0			0	2	0	0
9446	k	3	14	2007	3832	exit							danilo	1	0	0	0	1	12	0	0	0	0	0	0	0				0			0	0	0	0
10249	a27	5	14	2007	3832	exit							danilo	6	0	0	0	13	151	0	0	0	0	0	0	0				0			0	1	0	0
9434	k	3	13	2007	3832	exit							danilo	4	0	0	0	6	49	0	0	0	0	0	1	0				0			0	0	0	0
9429	j	3	12	2007	3832	exit							danilo	4	0	0	0	3	44	0	0	0	0	0	0	0				0			0	0	0	0
9645	w	4	11	2007	3832	exit							danilo	5	0	1	0	41	69	0	0	0	0	1	0	0				0			0	2	1	0
8899	549	2	10	2007	3832	exit			0				danilo	3	0	0	0	2	141	0	0	0	0	0	0	0		0	0	0	0	0	0	0	0	0	0	0		0		0
9125	561	3	10	2007	3832	exit			0				danilo	3	0	0	0	1	156	0	0	0	0	0	0	0		0	0	0	0	0	0	0	0	0	0	0		0		0
8951	552	9	10	2007	3832	exit			0				danilo	4	0	0	0	1	24	0	0	0	0	0	0	0		0	0	0	0	0	0	0	0	0	0	0		0		0
8874	548	10	10	2007	3832	exit			0				danilo	3	0	0	0	5	90	1	0	0	0	0	0	0		0	0	0	0	0	0	0	0	0	0	0		0		0
8927	551	17	10	2007	3832	exit			0				danilo	5	0	0	0	2	156	0	0	0	0	0	0	0		0	0	0	0	0	0	0	0	0	0	0		0		0
8940	551	18	10	2007	3832	exit			0				danilo	1	0	0	0	0	86	0	0	0	0	0	0	0		0	0	0	0	0	0	0	0	0	0	0		0		0
9041	556	22	10	2007	3832	exit			0				danilo	4	0	0	0	24	0	0	0	0	0	0	0	0		0	0	0	0	0	0	0	0	0	0	0		0		0				atrazou
9075	558	23	10	2007	3832	exit			0				danilo	15	0	0	0	53	63	0	0	0	0	0	0	0		0	0	0	0	0	0	0	0	0	0	0		0		0
9690	y	4	10	2007	3832	exit							danilo	7	0	0	1	5	22	0	0	0	0	0	0	1				0			0	1	1	0
8830	546	18	9	2007	3832	exit			0				danilo	5	0	0	0	25	171	0	0	0	0	0	0	0		0	0	0	0	0	0	0	0	0	0	0		0		0
8835	546	19	9	2007	3832	exit			0				danilo	20	0	0	0	37	167	0	0	0	0	0	0	0		0	0	0	0	0	0	0	0	0	0	0		0		0
8919	550	27	9	2007	3832	exit			0				abdul	7	0	0	0	6	96	0	0	0	0	0	0	0		0	0	0	0	0	0	0	0	0	0	0		0		0
8916	550	27	9	2007	3832	exit			0				danilo	1	0	0	0	11	156	0	0	0	0	0	0	0		0	0	0	0	0	0	0	0	0	0	0		0		0
9681	y	4	9	2007	3832	exit							danilo	0	0	0	0	4	33	0	0	0	0	0	0	0				0			0	0	0	0
10231	a26	5	9	2007	3832	exit							danilo	16	1	0	0	7	145	0	0	0	0	0	0	0				0			0	0	1	0
9270	b	3	8	2007	3832	exit							danilo	2	0	0	0	10	12	0	0	0	0	0	0	0				0			0	0	0	0		0		0		0
9366	g	3	7	2007	3832	exit							danilo	0	0	3	0	3	43	0	0	0	0	0	0	0				0			0	0	2	0
10188	a24	5	7	2007	3832	exit							danilo	11	1	0	3	0	84	0	0	0	0	0	0	0				0			0	0	1	0
9354	g	3	6	2007	3832	exit							danilo	4	0	0	0	2	137	1	0	0	0	0	0	0				0			0	0	2	0
9678	y	4	6	2007	3832	exit							danilo	6	0	0	0	42	116	0	0	0	0	0	0	0				0			0	0	0	0
9384	h	3	5	2007	3832	exit							danilo	7	0	0	0	1	57	1	0	0	0	0	1	0				0			0	0	0	0
9727	o	4	5	2007	3832	exit							danilo	5	0	0	0	3	16	0	0	0	0	0	0	0				0			0	0	0	0
11158	662	13	4	2007	3832	exit			0				danilo	0	0	0	0	0	46	0	0	0	0	0	0	1		0	0	29	0	0	9	3	0	0	0	0		0		0
9255	a	25	4	2007	3832	exit							danilo	6	0	0	0	0	68	0	0	0	0	0	0	0				0			0	0	1	0		0		0		0
9662	x	19	4	2007	3832	exit						white	eduardo	6	0	0	1	7	66	1	0	0	0	0	0	0				0			0	3	1	0
9580	t	29	3	2007	3832	exit							danilo	22	0	1	5	5	46	0	0	0	0	0	0	0				0			0	0	0	0
9413	i	3	2	2007	3832	exit							danilo	2	0	0	0	33	38	0	0	0	0	0	0	0				0			0	2	0	0
10217	a25	5	2	2007	3832	exit							danilo	2	0	0	0	0	86	0	0	0	0	0	0	0				0			0	2	0	0
9407	i	3	1	2007	3832	exit							danilo	1	0	0	0	4	65	0	0	0	0	0	0	0				0			0	0	0	0
10520	a40	1	18	2007	3831	exit						rosa	januario	5	0	0	0	4	136	1	0	0	0	0	1	0				0			0	1	1	0
10369	622	8	5	2008	3830	exit			0				mariamo	11	0	0	0	0	22	0	0	0	0	0	0	0		0	0	0	0	0	0	1	0	0	0	0		0		0
10343	621	5	5	2008	3828	exit			0				benilde	31	0	0	0	6	148	0	0	0	0	0	0	0		0	0	0	0	0	0	0	0	0	0	0		0		0
10383	623	6	5	2008	3828	exit			0				benilde	26	0	0	0	0	101	0	0	0	0	0	0	0		0	0	0	0	0	0	0	0	0	0	0		0		0
10357	622	7	5	2008	3828	exit			0				benilde	8	0	0	0	6	130	0	0	0	0	0	0	0		0	0	0	0	0	0	0	0	0	0	0		0		0
10367	622	8	5	2008	3828	exit			0				benilde	21	0	0	0	5	88	0	0	0	0	0	0	0		0	0	0	0	0	0	0	0	0	0	0		0		0
10108	610	9	5	2008	3828	exit			0				benilde	27	0	0	0	1	104	0	0	0	0	0	0	0		0	0	0	0	0	0	0	0	0	0	0		0		0
10274	618	14	5	2008	3828	exit			0				benilde	11	0	0	0	3	162	0	0	0	0	0	1	0		0	0	0	0	0	0	0	0	0	0	0		0		0
10290	618	15	5	2008	3828	exit			0				benilde	14	0	0	0	9	130	0	0	0	0	0	0	0		0	0	0	0	0	0	0	0	0	0	0		0		0
10476	628	1	4	2008	3828	exit		1	a				benilde	0	0	0	0	0	2	0	0	0	0	0	0	0		0	0	0	0	0	0	0	0	0	0	0		0		0
10474	628	1	4	2008	3828	exit		1	porta				pascoal	6	0	2	0	4	11	0	0	0	0	0	0	0		0	0	0	0	0	0	0	0	0	0	0		0		0
10478	628	1	4	2008	3828	exit		1	b				simao	1	0	0	0	0	1	0	0	0	0	0	0	0		0	0	0	0	0	0	1	0	0	0	0		0		0
10171	613	2	4	2008	3828	exit			0				benilde	24	0	0	0	4	161	0	0	0	0	0	0	0		0	0	0	0	0	0	0	0	0	0	0		0		0
10606	634	4	4	2008	3828	exit			0				benilde	2	0	0	0	3	65	0	0	0	0	0	0	0		0	0	0	0	0	0	0	0	0	0	0		0		0
10551	632	11	4	2008	3828	exit			0				benilde	16	0	0	0	10	75	0	0	0	0	0	0	0		0	0	0	0	0	0	0	0	0	0	0		0		0
10633	636	18	4	2008	3828	exit			0				benilde	9	0	0	0	4	74	0	0	0	0	0	0	0		0	0	0	0	0	0	0	0	0	0	0		0		0
10517	630	22	4	2008	3828	exit			0				benilde	12	0	0	0	28	81	0	0	0	0	0	0	0		0	0	0	0	0	0	0	0	0	0	0		0		0
10492	629	23	4	2008	3828	exit			0				benilde	28	0	0	0	14	108	0	0	0	0	0	0	0		0	0	0	0	0	0	0	0	0	0	0		0		0
10876	648	25	4	2008	3828	exit			0				benilde	16	0	0	0	3	133	0	0	0	0	0	0	0		0	0	0	0	0	0	0	0	0	0	0		0		0
10883	648	28	4	2008	3828	exit			0				benilde	2	0	0	0	4	40	0	0	0	0	0	0	0		0	0	1	0	0	0	0	0	0	0	0		0		0
10539	631	29	4	2008	3828	exit			0				benilde	19	0	0	0	5	93	0	0	0	0	0	0	0		0	0	0	0	0	0	1	1	0	0	0		0		0
10166	613	30	4	2008	3828	exit			0				benilde	11	0	0	0	5	60	0	0	0	0	0	0	0		0	0	0	0	0	0	1	0	0	0	0		0		0
10797	644	14	3	2008	3828	exit			0				benilde	1	0	0	0	4	32	0	0	0	0	0	0	0		0	0	0	0	0	0	1	0	0	0	0		0		0
10749	641	18	3	2008	3828	exit			0				farida	9	0	0	0	20	33	0	0	0	0	0	0	0		0	0	0	0	0	0	0	0	0	0	0		0		0
10722	640	19	3	2008	3828	exit			0				farida	7	0	0	0	7	27	0	0	0	0	0	0	0		0	0	0	0	0	0	0	1	0	0	0		0		0
10673	638	20	3	2008	3828	exit			0				farida	4	0	0	0	3	24	0	0	0	0	0	0	0		0	0	0	0	0	0	0	0	0	0	0		0		0
10679	638	21	3	2008	3828	exit			0				farida	9	0	0	0	4	40	0	0	0	0	0	2	0		0	0	0	0	0	0	1	0	0	0	0		0		0
10431	626	24	3	2008	3828	exit		0	porta				pascoal	2	0	0	0	0	55	0	0	0	0	0	0	0		0	0	0	0	0	0	1	0	0	0	0		0		0
10687	638	24	3	2008	3828	exit			0				farida	8	0	0	0	1	40	0	0	0	0	0	0	0		0	0	0	0	0	0	2	0	0	0	0		0		0
10429	625	25	3	2008	3828	exit		0	a				benilde	4	0	0	0	1	23	0	0	0	0	0	0	0		0	0	0	0	0	0	0	0	0	0	0		0		0
10430	625	25	3	2008	3828	exit		0	b				simao	0	0	1	0	4	8	0	0	0	0	0	0	0		0	0	1	0	0	0	0	0	0	0	0		0		0
10437	626	25	3	2008	3828	exit		0	a				benilde	2	0	0	0	7	15	0	0	0	0	0	0	0		0	0	0	0	0	0	0	0	0	0	0		0		0
10435	626	25	3	2008	3828	exit		0	porta				feliz	1	0	0	0	1	17	0	0	0	0	0	0	0		0	0	0	0	0	0	0	0	0	0	0		0		0
10436	626	25	3	2008	3828	exit		0	b				simao	1	0	0	0	1	1	0	0	0	0	0	0	0		0	0	0	0	0	0	1	1	0	0	0		0		0
10441	626	26	3	2008	3828	exit		1	b				benilde	0	0	0	0	0	3	0	0	0	0	0	0	0		0	0	0	0	0	0	1	0	0	0	0		0		0
10443	626	26	3	2008	3828	exit		1	a				efigenia	1	0	0	0	1	9	0	0	0	0	0	0	0		0	0	0	0	0	0	0	0	0	0	0		0		0
10442	626	26	3	2008	3828	exit		1	porta				pascoal	0	0	0	0	0	10	0	0	0	0	0	1	0		0	0	0	0	0	0	1	0	0	0	0		0		0
10444	626	27	3	2008	3828	exit		1	a				benilde	0	0	0	0	1	2	0	0	0	0	0	0	0		0	0	0	0	0	0	0	0	0	0	0		0		0
10445	626	27	3	2008	3828	exit		1	b				simao	0	0	0	0	0	1	0	0	0	0	0	0	0		0	0	0	0	0	0	0	0	0	0	0		0		0
10827	645	28	3	2008	3828	exit			0				benilde	1	0	0	0	38	16	0	0	0	0	0	0	0		0	0	0	0	0	0	1	0	0	0	0		0		0
10473	628	31	3	2008	3828	exit		0	porta				benilde	4	0	0	0	1	25	0	0	0	0	0	0	0		0	0	0	0	0	0	0	0	0	0	0		0		0
10471	628	31	3	2008	3828	exit		0	b				simao	1	0	0	0	0	2	0	0	0	0	0	0	0		0	0	0	0	0	0	0	0	0	0	0		0		0
9755	593	3	1	2008	3819	exit			0				ricardina	0	0	0	0	1	13	0	0	0	0	0	0	0		0	0	0	0	0	0	0	1	0	0	0		0		0
10361	a32	5	31	2007	3819	exit						rosa	ricardina	20	0	3	0	1	50	0	0	0	0	0	0	0				0			0	2	2	0
10350	a32	5	30	2007	3819	exit							ricardina	6	0	2	0	0	9	0	0	0	0	0	0	0				0			0	0	1	0
9395	i	2	28	2007	3819	exit						rosa	ricardina	6	0	0	0	10	35	0	0	0	0	0	0	0				0			0	1	0	0
9609	u	3	28	2007	3819	exit							ricardina	2	0	0	0	0	0	0	0	0	0	0	0	0				0			0	0	0	0
10374	a33	5	28	2007	3819	exit						verde	ricardo	20	0	0	0	2	16	0	0	0	0	0	0	0				0			0	0	0	0
9308	d	2	26	2007	3819	exit						rosa	ricardina	8	0	0	0	9	63	0	0	0	0	0	1	0				2			0	0	1	0		0		0		0
9632	v	3	26	2007	3819	exit						rosa	ricardina	3	0	0	0	0	16	0	0	0	0	0	0	0				0			0	0	1	0
10562	a43	1	24	2007	3819	exit						rosa	ricardina	3	0	0	0	0	18	0	0	0	0	0	0	0				0			0	0	0	0
9558	s	2	24	2007	3819	exit						rosa	ricardina	0	0	0	0	0	66	0	0	0	0	0	0	0				0			0	0	0	1
10586	a44	1	23	2007	3819	exit							ricardina		0	0	0	1	5	0	0	0	0	0	0	0				0			0	0	0	0
9333	e	2	22	2007	3819	exit						rosa	ricardina	5	0	0	0	1	2	0	0	0	0	0	0	0				0			0	0	0	0		0		0		0
10522	a41	1	22	2007	3819	exit						rosa	ricardina	3	0	0	0	0	17	1	0	0	0	0	0	0				0			0	0	0	0
10334	a31	5	22	2007	3819	exit						rosa	ricardina	7	0	0	1	0	4	0	0	0	0	0	0	1				0			0	0	0	0
10325	a31	5	21	2007	3819	exit						rosa	ricardina	7	0	0	3	0	147	0	0	0	0	0	0	0				0			0	0	1	0
9320	e	2	20	2007	3819	exit						rosa	ricardina	6	0	0	0	4	28	0	0	0	0	0	1	0				0			0	0	0	0		0		0		0
10542	a42	1	18	2007	3819	exit						rosa	ricardina		0	0	0	3	19	0	0	0	0	0	0	0				0			0	0	1	0
10513	a40	1	17	2007	3819	exit						rosa	ricardina	2	0	0	0	3	36	0	0	0	0	0	0	0				0			0	0	0	0
9701	z	4	17	2007	3819	exit						rosa	ricardina	8	0	0	0	3	29	0	0	0	0	0	0	0				0			0	1	2	0
9552	r	2	14	2007	3819	exit						rosa	ricardina	8	0	0	0	9	95	0	0	0	0	0	2	0				0			0	0	0	0
9448	k	3	14	2007	3819	exit						rosa	ricardina	5	0	0	1	6	42	0	0	0	0	0	0	0				0			0	1	0	0
9437	k	3	13	2007	3819	exit						rosa	ricardina	2	0	0	0	4	35	0	0	0	0	0	1	0				0			0	3	0	0
10414	a35	1	12	2007	3819	exit							teste vivo	7	0	0	0	0	37	1	0	0	0	0	1	0				0			0	0	1	0
9536	r	2	12	2007	3819	exit							ricardina	2	0	0	0	5	68	0	0	0	0	0	3	0				0			0	0	0	0
9423	j	3	12	2007	3819	exit						rosa	ricardina	4	0	0	0	6	39	0	0	0	0	0	0	0				0			0	0	0	0
9649	w	4	12	2007	3819	exit							ricardina	0	0	0	1	0	18	0	0	0	0	0	0	0				0			0	0	0	0
9194	564	15	11	2007	3819	exit			0				ricardina	4	0	0	0	1	86	0	0	0	0	0	0	0				0	0	0	0	0	1	0	0	0		0		0
9168	563	16	11	2007	3819	exit			0				fatima	7	0	0	0	3	21	0	0	0	0	0	0	0		0	0	0	0	0	0	2	0	0	0	0		0		0
9648	587	19	11	2007	3819	exit			0				ricardina	4	0	0	0	0	27	0	0	0	0	0	0	0		0	0	0	0	0	0	4	0	0	0	0		0		0
9577	584	20	11	2007	3819	exit			0				ricardina	4	0	0	0	1	59	0	0	0	0	0	1	0		0	0	0	0	0	0	0	0	0	0	0		0		0
9587	584	21	11	2007	3819	exit			0				ricardina	1	0	0	0	0	12	0	0	0	0	0	0	0		0	0	0	0	0	0	4	1	0	0	0		0		0
9669	588	23	11	2007	3819	exit			0				ricardina	2	0	0	0	1	59	0	0	0	0	0	0	0		0	0	0	0	0	0	0	2	0	0	0		0		0
9475	579	28	11	2007	3819	exit			0				ricardina	1	0	0	0	1	18	0	0	0	0	0	0	0		0	0	0	0	0	0	0	0	0	0	0		0		0
9488	579	29	11	2007	3819	exit			0				ricardina	6	0	0	0	4	16	0	0	0	0	0	0	0		0	0	0	0	0	0	2	1	0	0	0		0		0
8869	548	10	10	2007	3819	exit			0				ricardina	0	0	0	0	0	50	0	0	0	0	0	0	0		0	0	0	0	0	0	0	0	0	0	0		0		0
8968	553	11	10	2007	3819	exit			0				ricardina	7	0	0	0	0	200	0	0	0	0	0	0	0		0	0	0	0	0	0	0	0	0	0	0		0		0
9034	556	19	10	2007	3819	exit			0				ricardina	0	0	0	0	0	7	0	0	0	0	0	0	0		0	0	0	0	0	0	0	0	0	0	0		0		0
9089	559	24	10	2007	3819	exit			0				ricardina	8	0	0	0	2	30	0	0	0	0	0	0	0		0	0	0	0	0	0	2	0	0	0	0		0		0
8787	544	4	9	2007	3819	exit			0				ricardina	23	0	0	0	3	170	0	0	0	0	0	0	0		0	0	0	0	0	2	3	0	0	0	0		0		0
8791	544	5	9	2007	3819	exit			0				ricardina	21	0	0	0	3	122	0	0	0	0	0	0	0		0	0	0	0	0	0	1	0	0	0	0		0		0
8801	544	6	9	2007	3819	exit			0				ricardina	5	0	0	0	0	52	0	0	0	0	0	0	0		0	0	0	0	0	0	4	1	0	0	0		0		0
8764	541	12	9	2007	3819	exit			0				ricardina	8	0	0	0	0	64	0	0	0	0	0	0	0		0	0	0	0	0	0	0	1	0	0	0		0		0
9220	566	20	8	2007	3819	exit			0				ricardina	12	0	0	0	3	16	0	0	0	0	0	0	0		0	0	0	0	0	0	0	0	0	0	0		0		0
10226	a26	5	8	2007	3819	exit							ricardina	31	0	0	0	3	76	0	0	0	0	0	0	0				0			0	4	3	0
9386	574	16	7	2007	3819	exit			0				ricardina	35	0	0	0	2	33	0	0	0	0	0	0	0		0	0	0	0	0	0	1	1	0	0	0		0		0
8709	538	17	7	2007	3819	exit			0				ricardina	16	0	0	0	0	3	0	0	0	0	0	0	0		0	0	0	0	0	0	0	0	0	0	0		0		0
9306	570	25	7	2007	3819	exit			0				ricardina	30	0	0	0	2	24	0	0	0	0	0	0	0		0	0	0	0	0	0	1	1	0	0	0		0		0
9496	p	2	7	2007	3819	exit						rosa	ricardina	18	0	0	0	9	127	1	0	0	0	0	5	0				0			0	0	1	0
10192	a24	5	7	2007	3819	exit						rosa	ricardina	20	0	0	0	3	73	0	0	0	0	0	0	0				0			0	1	1	0
9341	572	8	6	2007	3819	exit			0				ricardina	45	0	0	0	0	43	0	0	0	0	0	0	0		0	0	0	0	0	0	1	0	0	0	0		0		0
9415	576	11	6	2007	3819	exit			0				ricardina	36	1	0	0	0	14	0	0	0	0	0	0	0		0	0	0	0	0	0	0	0	0	0	0		0		0
9346	f	2	6	2007	3819	exit						rosa	ricardina	6	0	0	0	6	66	0	0	0	0	0	2	0				0			0	0	0	0
9393	h	3	6	2007	3819	exit							ricardina	4	0	0	0	4	41	0	0	0	0	0	3	0				0			0	0	0	0
10300	a29	6	6	2007	3819	exit						rosa	ricardina	7	0	0	0	2	10	0	0	0	0	0	0	0				0			0	0	0	0
11166	662	16	4	2007	3819	exit			0				ricardina	9	0	0	0	2	33	0	0	0	0	0	0	0		0	0	0	0	0	0	0	0	0	0	0		0		0
9250	a	25	4	2007	3819	exit						rosa	ricardina	5	0	0	0	1	21	0	0	0	0	0	0	0				0			0	1	0	0		0		0		0
10288	a29	6	4	2007	3819	exit						rosa	ricardina	103	0	3	0	4	100	0	0	0	0	0	0	0				0			0	0	0	0
9658	x	19	4	2007	3819	exit						rosa	ricardina	3	0	0	0	1	28	0	0	0	0	0	0	0				0			0	2	1	0
9475	n	19	3	2007	3819	exit						rosa	ricardina	10	0	0	0	2	98	0	0	0	0	0	0	0				0			0	0	0	0
10380	a33	29	3	2007	3819	exit						rosa	ricardina	20	0	3	0	0	21	0	0	0	0	0	0	0				0			0	0	1	0
10599	a44	2	2	2007	3819	exit						rosa	ricardina	19	0	0	0	2	100	0	0	0	0	0	0	0				0			0	0	0	0
10216	a25	5	2	2007	3819	exit							ricardina	3	0	0	0	2	39	0	0	0	0	0	0	0				0			0	0	0	0
10554	a42	19	1	2007	3819	exit						rosa	ricardina		0	0	0	2	9	0	0	0	0	0	0	0				0			0	0	0	0
8833	546	19	9	2007	3814	exit			0				ricardina	18	0	0	0	2	70	0	0	0	0	0	0	0		0	0	0	0	0	0	2	0	0	0	0		0		0
10561	a43	1	24	2007	3808	exit							dc		0	0	0	0	2	1	0	0	0	1	2	0				0			0	0	0	0
9780	594	13	8	2008	3806	exit			0				juvencia	31	0	0	0	10	109	0	0	0	0	0	0	0		0	0	0	0	0	0	0	0	0	0	0		0		0
10477	628	1	4	2008	3806	exit		0	porta				efigenia	0	0	0	0	0	15	0	0	0	0	0	0	0		0	0	0	0	0	0	0	0	0	0	0		0		0
10169	613	2	4	2008	3806	exit			0				efigenia	13	0	0	0	2	146	0	0	0	0	0	0	0		0	0	0	0	0	0	0	0	0	0	0		0		0
10852	647	9	4	2008	3806	exit			0				fatima	2	0	0	0	1	73	0	0	0	0	0	0	0		0	0	0	0	0	0	0	2	0	0	0		0		0
8950	552	9	10	2007	3805	exit			0				np	4	0	0	0	8	101	0	0	0	0	0	0	0		0	0	0	0	0	0	0	0	0	0	0		0		0
8782	541	13	9	2007	3805	exit			0				imo	4	0	0	0	1	63	0	0	0	0	0	0	0		0	0	0	0	0	0	0	0	0	0	0		0		0
	694	5	1	2009	3804	exit								6	0	0	0	12	40	0	0	0	0	0	0	0	0	0	0	0	0	0	0	0	0	0	0
	696	16	1	2009	3804	exit								0	0	0	0	1	13	2	0	0	0	0	0	0	0	0	0	0	0	0	0	2	0	0	0
	696	23	1	2009	3804	exit								2	0	0	0	1	6	0	0	0	0	0	0	0	0	0	0	0	0	0	0	0	0	0	0
	693	11	12	2008	3804	exit								5	0	0	0	2	90	0	0	0	0	0	0	0	0	0	0	0	0	0	0	1	0	0	0
	693	12	12	2008	3804	exit								13	0	0	0	10	48	0	0	0	0	0	0	0	0	0	0	0	0	0	0	0	0	0	0
	693	16	12	2008	3804	exit								2	0	0	0	3	51	0	0	0	0	0	0	0	0	0	0	0	0	0	0	0	0	0	0
	693	18	12	2008	3804	exit								2	0	0	0	5	48	0	0	0	0	0	0	0	0	0	0	0	0	0	0	0	0	0	0
11457	677	4	11	2008	3804	exit							isabel	9	0	0	0	2	29	0	0	0	0	0	0	0		0	0	0	0	0	0	0	0	0	0	0		0		0
11418	675	6	11	2008	3804	exit							isabel	3	0	0	0	8	70	0	0	0	0	0	0	0		0	0	0	0	0	0	0	0	0	0	0		0		0
11428	675	7	11	2008	3804	exit							isabel	13	0	0	0	24	158	0	0	0	0	0	0	0		0	0	0	0	0	0	0	0	0	0	0		0		0
11730	691	10	11	2008	3804	exit							isabel	0	0	0	0	2	79	0	0	0	0	0	0	0		0	0	0	0	0	0	0	0	1aedes	0	0		0		0
11739	691	11	11	2008	3804	exit							isabel	4	0	0	0	14	98	0	0	0	0	0	0	0		0	0	0	0	0	0	2	1	0	0	0		0		0
11715	690	12	11	2008	3804	exit							isabel	2	0	0	0	6	63	0	0	0	0	0	0	0		0	0	0	0	0	0	0	0	0	0	0		0		0
11571	682	1	10	2008	3804	exit							isabel	5	1	0	0	16	80	0	0	0	0	0	0	0		0	0	0	0	0	0	0	1	0	0	0		0		0
11602	684	2	10	2008	3804	exit							isabel	8	0	0	0	18	39	0	0	0	0	0	0	0		0	0	0	0	0	0	0	0	0	0	0		0		0
11616	685	6	10	2008	3804	exit							isabel	2	0	0	0	10	117	0	0	0	0	0	0	0		0	0	0	0	0	0	1	0	0	0	0		0		0
11512	680	8	10	2008	3804	exit							isabel	1	0	0	0	11	63	0	0	0	0	0	0	0		0	0	0	0	0	0	0	1	0	0	0		0		0
11523	680	9	10	2008	3804	exit							isabel	8	0	0	0	9	87	0	0	0	0	0	0	0		1	0	0	0	0	0	0	1	0	0	0		0		0
11499	679	13	10	2008	3804	exit							isabel	6	0	0	0	18	61	0	0	0	0	0	0	0		0	0	0	0	0	0	1	4	0	0	0		0		0
11509	679	14	10	2008	3804	exit							isabel	5	0	0	0	7	43	0	0	0	0	0	0	0		0	0	0	0	0	0	0	0	0	0	0		0		0
11638	686	15	10	2008	3804	exit							isabel	4	0	0	0	3	46	0	0	0	0	0	0	0		0	0	0	0	0	0	0	0	0	0	0		0		0
11434	676	28	10	2008	3804	exit							isabel	0	0	0	0	0	16	0	0	0	0	0	0	0		0	0	0	0	0	0	0	0	0	0	0		0		0
11442	676	29	10	2008	3804	exit							isabel	4	0	0	0	4	102	0	0	0	0	0	0	0		0	0	0	0	0	0	0	2	0	0	0		0		0
11449	676	30	10	2008	3804	exit							isabel	3	0	0	0	2	48	0	0	0	0	0	0	0		0	0	0	0	0	0	0	0	0	0	0		0		0
11272	668	2	9	2008	3804	exit							isabel	7	0	0	0	7	68	0	0	0	0	0	1	0		0	0	0	0	0	0	0	0	0	0	0		0		0
11290	668	3	9	2008	3804	exit							isabel	0	0	0	0	11	48	0	0	0	0	0	0	0		0	0	0	0	0	0	0	0	0	0	0		0		0
11263	667	4	9	2008	3804	exit							isabel	2	0	0	0	24	92	0	0	0	0	0	0	0		0	0	0	0	0	0	0	0	0	0	0		0		0
11191	664	15	9	2008	3804	exit			0				isabel	8	0	0	0	18	74	0	0	0	0	0	0	0		0	0	0	0	0	0	0	0	0	0	0		0		0
11201	664	16	9	2008	3804	exit			0				isabel	1	0	0	0	9	43	0	0	0	0	0	0	0		0	0	0	0	0	0	2	1	0	0	0		0		0
11208	664	17	9	2008	3804	exit			0				isabel	2	0	0	0	13	46	0	0	0	0	0	0	0		0	0	0	0	0	0	0	1	0	0	0		0		0
11594	683	22	9	2008	3804	exit							isabel	2	0	0	0	4	36	0	0	0	0	0	0	0		0	0	0	0	0	0	0	0	0	0	0		0		0
11537	681	23	9	2008	3804	exit							isabel	28	5	0	0	3	31	0	0	0	0	0	0	0		0	0	0	0	0	0	0	0	0	0	0		0		0
11540	681	24	9	2008	3804	exit							isabel	2	0	0	0	16	47	0	0	0	0	0	1	0		0	0	0	0	0	0	0	0	0	0	0		0		0
11556	682	29	9	2008	3804	exit							isabel	16	0	0	0	11	154	0	0	0	0	0	0	0		0	0	0	0	0	0	0	0	0	0	0		0		0
11564	682	30	9	2008	3804	exit							isabel	13	0	0	0	23	115	0	0	0	0	0	0	0		0	0	0	0	0	0	2	0	0	0	0		0		0
9938	602	7	8	2008	3804	exit			0				isabel	1	0	0	0	10	37	0	0	0	0	0	0	0		0	0	1	0	0	0	0	0	0	0	0		0		0
9949	602	8	8	2008	3804	exit			0				isabel	1	0	0	0	25	17	0	0	0	0	0	0	0		0	0	0	0	0	0	0	0	0	0	0		0		0
9928	601	12	8	2008	3804	exit			0				isabel	1	0	0	0	7	30	0	0	0	0	0	0	0		0	0	0	0	0	0	0	0	0	0	0		0		0
9776	594	13	8	2008	3804	exit			0				isabel	2	0	0	0	10	27	0	0	0	0	0	0	0		0	0	0	0	0	0	1	0	0	0	0		0		0
9793	594	14	8	2008	3804	exit			0				isabel	1	1	0	0	10	18	0	0	0	0	0	0	0		0	0	0	0	0	0	0	0	0	0	0		0		0
11303	669	15	8	2008	3804	exit							isabel	0	0	0	0	7	80	0	0	0	0	0	0	0		0	0	0	0	0	0	0	0	0	0	0		0		0
11356	672	18	8	2008	3804	exit							isabel	2	0	0	0	6	10	0	0	0	0	0	0	0		0	0	0	0	0	0	0	0	0	0	0		0		0
11366	672	19	8	2008	3804	exit							isabel	3	0	0	0	10	57	0	0	0	0	0	0	0		0	0	0	0	0	0	0	0	1aedes	0	0		0		0
11376	673	20	8	2008	3804	exit							isabel	3	0	0	0	5	41	0	0	0	0	0	0	0		0	0	1	0	0	0	0	0	0	0	0		0		0
11334	671	21	8	2008	3804	exit							isabel	1	0	0	0	13	41	0	0	0	0	0	0	0		0	0	0	0	0	0	0	0	1aedes	0	0		0		0
11345	671	22	8	2008	3804	exit							isabel	5	0	0	0	4	7	0	0	0	0	0	0	0		0	0	1	0	0	0	0	0	1aedes	0	0		0		0
11349	671	25	8	2008	3804	exit							isabel	4	0	0	0	1	16	0	0	0	0	0	0	0		0	0	0	0	0	0	0	0	0	0	0		0		0
11321	670	26	8	2008	3804	exit							isabel	13	0	0	0	5	89	0	0	0	0	0	0	0		0	0	0	0	0	0	0	1	0	0	0		0		0
11238	666	27	8	2008	3804	exit							isabel	8	0	0	0	5	93	0	0	0	0	0	0	0		0	0	0	0	0	0	0	0	0	0	0		0		0
11246	666	28	8	2008	3804	exit							isabel	5	0	0	0	10	55	0	0	0	0	0	0	0		0	0	0	0	0	0	0	0	0	0	0		0		0
11402	674	29	8	2008	3804	exit							isabel	1	0	0	0	21	59	0	0	0	0	0	0	0		0	0	0	0	0	0	0	0	0	0	0		0		0
10342	621	5	5	2008	3804	exit			0				ivete	3	0	0	0	7	101	0	0	0	0	0	0	0		0	0	0	0	0	0	0	0	0	0	0		0		0
10374	623	6	5	2008	3804	exit			0				ivete	8	0	0	0	14	102	0	0	0	0	0	0	0		0	0	0	0	0	0	1	0	0	0	0		0		0
10353	622	7	5	2008	3804	exit			0				ivete	8	0	0	0	10	40	0	0	0	0	0	0	0		0	0	0	0	0	0	1	0	0	0	0		0		0
10097	610	8	5	2008	3804	exit			0				ivete	10	0	0	0	12	66	0	0	0	0	0	0	0		0	0	0	0	0	0	0	0	0	0	0		0		0
10327	620	13	5	2008	3804	exit			0				ivete	4	0	0	0	15	141	0	0	0	0	0	0	0		0	0	0	0	0	0	0	1	0	0	0		0		0
10279	618	14	5	2008	3804	exit			0				ivete	20	0	0	0	13	86	0	0	0	0	0	0	0		0	0	0	0	0	0	0	0	0	0	0		0		0
10651	637	15	5	2008	3804	exit			0				ivete	7	0	0	0	17	74	0	0	0	0	0	0	0		0	0	0	0	0	0	0	0	0	0	0		0		0
10662	637	16	5	2008	3804	exit			0				ivete	6	0	0	0	23	76	0	0	0	0	0	0	0		0	0	0	0	0	0	0	1	0	0	0		0		0
10256	617	19	5	2008	3804	exit			0				ivete	5	0	0	0	7	80	0	0	0	0	0	0	0		0	0	0	0	0	0	0	0	0	0	0		0		0
10996	654	20	5	2008	3804	exit			0				ivete	3	0	0	0	9	19	0	0	0	0	0	0	0		0	0	0	0	0	0	0	1	0	0	0		0		0
11001	654	21	5	2008	3804	exit			0				ivete	13	0	0	0	12	83	0	0	0	0	0	0	0		0	0	0	0	0	0	0	0	0	0	0		0		0
10894	649	1	4	2008	3804	exit			0				ivete	6	0	0	0	14	48	0	0	0	0	0	0	0		0	0	0	0	0	0	0	0	0	0	0		0		0
10172	613	2	4	2008	3804	exit			0				ivete	9	0	0	0	5	105	0	0	0	0	0	0	0		0	0	0	0	0	0	1	1	0	0	0		0		0
10909	649	2	4	2008	3804	exit			0				ivete	3	0	0	0	2	24	0	0	0	0	0	0	0		0	0	0	0	0	0	0	0	0	0	0		0		0
10608	634	4	4	2008	3804	exit			0				ivete	4	0	0	0	4	18	0	0	0	0	0	1	0		0	0	0	0	0	0	1	0	0	0	0		0		0
10581	633	8	4	2008	3804	exit			0				ivete	9	0	0	0	10	41	0	0	0	0	0	0	0		0	0	1	0	0	0	0	0	0	0	0		0		0
10583	633	9	4	2008	3804	exit			0				ivete	3	0	0	0	10	66	0	0	0	0	0	0	0		0	0	0	0	0	0	0	0	0	0	0		0		0
10854	647	10	4	2008	3804	exit			0				ivete	1	0	0	0	11	43	0	0	0	0	0	1	0		0	0	0	0	0	0	0	0	0	0	0		0		0
10558	632	11	4	2008	3804	exit			0				ivete	4	0	0	0	7	31	0	0	0	0	0	0	0		0	0	0	0	0	0	2	0	0	0	0		0		0
10570	632	12	4	2008	3804	exit			0				ivete	4	0	0	0	12	42	0	0	0	0	0	0	0		0	0	0	0	0	0	0	0	0	0	0		0		0
10393	624	17	4	2008	3804	exit			0				ivete	10	0	0	0	12	48	0	0	0	0	0	0	0		0	0	0	0	0	0	0	0	0	0	0		0		0
10632	636	18	4	2008	3804	exit			0				ivete	4	0	0	0	7	39	0	0	0	0	0	0	0		0	0	0	0	0	0	0	0	0	0	0		0		0
10515	630	22	4	2008	3804	exit			0				ivete	5	0	0	0	10	90	0	0	0	0	0	0	0		0	0	0	0	0	0	0	0	0	0	0		0		0
10499	629	23	4	2008	3804	exit			0				ivete	8	0	0	0	20	88	0	0	0	0	0	0	0		0	0	0	0	0	0	0	0	0	0	0		0		0
10875	648	25	4	2008	3804	exit			0				ivete	6	0	0	0	12	80	0	0	0	0	0	0	0		0	0	0	0	0	0	0	0	0	0	0		0		0
10534	631	28	4	2008	3804	exit			0				ivete	1	0	0	0	3	50	0	0	0	0	0	0	0		0	0	0	0	0	0	0	1	0	0	0		0		0
10538	631	29	4	2008	3804	exit			0				ivete	17	0	0	0	7	45	0	0	0	0	0	0	0		0	0	0	0	0	0	4	2	0	0	0		0		0
10161	613	30	4	2008	3804	exit			0				ivete	4	0	0	0	4	58	0	0	0	0	0	0	0		0	0	0	0	0	0	2	0	0	0	0		0		0
10178	614	7	3	2008	3804	exit			0				ivete	2	0	0	0	3	14	0	0	0	0	0	0	0		0	0	0	0	0	0	0	0	0	0	0		0		0
10455	627	10	3	2008	3804	exit		0	a				benilde	0	0	0	0	1	4	0	0	0	0	0	0	0		0	0	1	0	0	0	0	0	0	0	0		0		0
10454	627	10	3	2008	3804	exit		0	porta				ivete	2	0	0	0	2	10	0	0	0	0	0	0	0		0	0	0	0	0	0	0	0	0	0	0		0		0
10451	627	10	3	2008	3804	exit		0	b				pascoal	0	0	0	0	1	15	0	0	0	0	0	0	0		0	0	0	0	0	0	1	0	0	0	0		0		0
10764	642	11	3	2008	3804	exit			0				ivete	1	0	0	0	1	28	0	0	0	0	0	0	0		0	0	0	0	0	0	0	0	0	0	0		0		0
10792	644	13	3	2008	3804	exit			0				ivete	3	0	0	0	4	26	0	0	0	0	0	0	0		0	0	0	0	0	0	0	0	0	0	0		0		0
10800	644	14	3	2008	3804	exit			0				ivete	5	0	0	0	6	31	0	0	0	0	0	0	0		0	0	0	0	0	0	0	0	0	0	0		0		0
10735	641	17	3	2008	3804	exit			0				ivete	7	0	0	0	7	28	0	0	0	0	0	0	0		0	0	0	0	0	0	0	0	0	0	0		0		0
10720	640	19	3	2008	3804	exit			0				ivete	0	0	0	0	0	33	0	0	0	0	0	0	0		0	0	0	0	0	0	0	0	0	0	0		0		0
10702	639	24	3	2008	3804	exit			0				ivete	4	0	0	0	19	30	0	0	0	0	0	0	0		0	0	0	0	0	0	0	0	0	0	0		0		0
10700	639	25	3	2008	3804	exit			0				ivete	1	0	0	0	11	24	0	0	0	0	0	0	0		0	0	0	0	0	0	0	0	0	0	0		0		0
10710	639	26	3	2008	3804	exit			0				ivete	5	0	0	0	7	49	1	0	0	0	0	0	0		0	0	1	0	0	0	0	1aede	0	0	0		0		0
10813	645	27	3	2008	3804	exit			0				ivete	6	0	0	0	7	24	0	0	0	0	0	0	0		0	0	0	0	0	0	0	0	0	0	0		0		0
10829	645	28	3	2008	3804	exit			0				ivete	5	0	0	0	9	23	0	0	0	0	0	0	0		0	0	0	0	0	0	0	0	0	0	0		0		0
10846	646	31	3	2008	3804	exit			0				ivete	2	0	0	0	8	36	0	0	0	0	0	0	0		0	0	0	0	0	0	1	0	0	0	0		0		0
10755	642	26	2	2008	3804	exit			0				ivete	2	0	0	0	13	30	0	0	0	0	0	0	0		0	0	0	0	0	0	0	0	0	0	0		0		0
9758	593	3	1	2008	3804	exit			0				alima	79	0	0	0	4	79	0	0	0	0	0	0	0		0	0	0	0	0	0	1	1	0	0	0		0		0
9753	592	12	1	2008	3804	exit			0				alima	7	0	0	0	3	56	0	0	0	0	0	0	0		0	0	0	0	0	0	4	4	0	0	0		0		0
9822	596	17	1	2008	3804	exit			0				alima	4	0	0	0	1	32	0	0	0	0	0	0	0		0	0	4	0	0	0	3	9	0	0	0		0		0
10305	a30	5	31	2007	3804	exit							bacar	4	0	0	2	8	47	0	0	0	0	0	0	0				0			0	0	0	1
9571	s	2	25	2007	3804	exit						rosa	eduardo	3	0	0	0	18	21	0	0	0	0	0	0	0				0			0	0	1	1
9562	s	2	24	2007	3804	exit							eduardo	1	0	0	0	0	51	0	0	0	0	0	0	0				0			0	0	2	1
10094	a19	5	24	2007	3804	exit							dc	6	0	0	0	8	27	0	0	0	0	0	0	0				0			0	0	0	1
10252	a27	5	14	2007	3804	exit							eduardo	6	0	0	0	20	87	0	0	0	0	0	0	0				0			0	0	1	0
9559	583	6	12	2007	3804	exit			0				alima	4	0	0	0	2	16	0	0	0	0	0	0	0		0	0	0	0	0	0	0	0	0	0	0		0		0
9567	583	7	12	2007	3804	exit			0				alima	6	0	0	0	19	13	0	0	0	0	0	0	0		0	0	0	0	0	0	0	0	0	0	0		0		0
9571	583	9	12	2007	3804	exit			0				alima	0	0	0	0	11	10	0	0	0	0	0	0	0		0	0	0	0	0	0	0	0	0	0	0		0		0
9549	582	12	12	2007	3804	exit			0				alima	12	1	0	0	10	1	0	0	0	0	0	0	0		0	0	0	0	0	0	0	0	1aesdes	0	0		0		0
9516	581	18	12	2007	3804	exit			0				alima	1	0	0	0	1	52	0	0	0	0	0	0	0		0	0	0	0	0	0	2	2	0	0	0		0		0
8955	552	9	10	2007	3804	exit			0				blank	6	0	0	0	4	76	0	0	0	0	0	0	0		0	0	0	0	0	0	1	0	0	0	0		0		0
10240	a26	5	10	2007	3804	exit							eduardo	13	1	0	0	15	48	0	0	0	0	0	0	0				0			0	0	0	0
8814	545	3	9	2007	3804	exit			0				bacar	35	0	0	0	33	350	0	0	0	0	0	0	0		0	0	0	0	0	0	1	1	0	0	0		0		0
8788	544	4	9	2007	3804	exit			0				bacar	10	0	0	0	23	248	0	0	0	0	0	0	0		0	0	0	0	0	0	0	2	0	0	0		0		0
8790	544	5	9	2007	3804	exit			0				bacar	19	0	0	0	32	153	0	0	0	0	0	0	0		0	0	0	0	0	0	1	1	0	0	0		0		0
8769	541	12	9	2007	3804	exit			0				bacar	10	0	0	0	0	256	0	0	0	0	0	0	0		0	0	0	0	0	0	2	0	0	0	0		0		0
10234	a26	5	9	2007	3804	exit							eduardo	3	0	0	0	17	73	0	0	0	0	0	0	0				0			0	1	1	0
9285	569	8	8	2007	3804	exit			0				cf	1	0	0	0	2	54	0	0	0	0	0	0	0		0	0	0	0	0	0	1	0	0	0	0		0		0
9446	577	23	8	2007	3804	exit			0				bacar	6	1	0	0	8	214	0	0	0	0	0	0	0		0	0	0	0	0	0	0	0	0	0	0		0		0
9449	577	23	8	2007	3804	exit			0				cf	13	0	0	0	1	60	0	0	0	0	0	0	0		0	0	0	0	0	0	0	0	0	0	0		0		0
9453	577	24	8	2007	3804	exit			0				bacar	25	0	0	0	28	213	0	0	0	0	0	0	0		0	0	0	0	0	0	0	1	0	0	0		0		0
8731	539	27	8	2007	3804	exit			0				bacar	11	1	0	0	27	370	0	0	0	0	0	0	0		0	0	0	0	0	0	0	0	0	0	0		0		0
8856	547	30	8	2007	3804	exit			0				bacar	7	0	0	0	28	302	0	0	0	0	0	0	0		0	0	0	0	0	0	0	0	0	0	0		0		0
10189	a24	5	7	2007	3804	exit						rosa	eduardo	6	0	0	2	23	69	0	0	0	0	0	0	0				0			0	1	1	0
11155	662	15	4	2007	3804	exit			0				eduardo	0	0	0	0	1	32	0	0	0	0	0	0	0		0	0	0	0	0	0	1	1	0	0	0		0		0
11164	662	16	4	2007	3804	exit			0				eduardo	1	0	0	0	16	30	0	0	0	0	0	0	0		0	0	0	0	0	0	0	2	1aede	0	0		0		0
9257	a	25	4	2007	3804	exit						rosa	eduardo	1	0	0	0	5	18	0	0	0	0	0	0	0				0			0	1	0	0		0		0		0
9719	o	4	4	2007	3804	exit						rosa	eduardo	3	0	0	0	44	55	0	0	0	0	0	0	0				0			0	0	0	0
10212	a25	5	2	2007	3804	exit						rosa	eduardo	0	0	0	0	17	84	0	0	0	0	0	0	0				0			0	0	0	1
11017	655	1	7	2008	3802	exit			0				tina	4	0	0	0	1	18	0	0	0	0	0	0	0		0	0	0	0	0	0	0	0	0	0	0		0		0
11025	655	2	7	2008	3802	exit			0				tina	8	0	0	0	1	9	0	0	0	0	0	0	0		0	0	0	0	0	0	1	1	0	0	0		0		0
11112	660	3	7	2008	3802	exit			0				tina	13	0	0	0	2	30	0	0	0	0	0	0	0		0	0	0	0	0	0	0	1	0	0	0		0		0
11123	660	4	7	2008	3802	exit			0				tina	1	0	0	0	1	6	0	0	0	0	0	0	0		0	0	0	0	0	0	0	0	0	0	0		0		0
11129	660	7	7	2008	3802	exit			0				tina	5	0	0	0	2	22	0	0	0	0	0	0	0		0	0	1	0	0	2	0	0	0	0	0		0		0
10065	608	9	7	2008	3802	exit			0				tina	10	0	0	0	0	23	0	0	0	0	0	0	0		0	0	0	0	0	0	0	0	0	0	0		0		0
10081	609	10	7	2008	3802	exit			0				tina	1	0	0	0	3	43	0	0	0	0	0	0	0		0	0	1	0	0	0	0	1	0	0	0		0		0
10092	609	11	7	2008	3802	exit			0				tina	3	0	0	0	7	73	0	0	0	0	0	0	0		0	0	0	0	0	0	1	0	1aede	0	0		0		0
11074	658	14	7	2008	3802	exit			0				tina	0	0	0	0	2	17	0	0	0	0	0	0	0		0	0	0	0	0	0	0	0	0	0	0		0		0
11083	658	15	7	2008	3802	exit			0				tina	4	0	0	0	1	10	0	0	0	0	0	0	0		0	0	0	0	0	0	0	0	0	0	0		0		0
10016	606	31	7	2008	3802	exit			0				tina	2	0	0	0	2	22	0	0	0	0	0	0	0		0	0	0	0	0	0	0	0	0	0	0		0		0
9891	599	2	6	2008	3802	exit			0				tina	4	0	0	0	0	48	0	0	0	0	0	0	0		0	0	0	0	0	1	2	0	0	0	0		0		0
10959	652	3	6	2008	3802	exit			0				tina	11	0	0	0	1	66	0	0	0	0	0	0	0		0	0	0	0	0	0	0	0	0	0	0		0		0
10980	653	4	6	2008	3802	exit			0				tina	10	0	0	0	0	7	0	0	0	0	0	0	0		0	0	0	0	0	0	0	1	0	0	0		0		0
9849	597	6	6	2008	3802	exit			0				tina	4	0	0	0	2	28	0	0	0	0	0	0	0		0	0	0	0	0	0	1	0	0	0	0		0		0
10035	607	9	6	2008	3802	exit			0				tina	10	0	0	0	1	9	0	0	0	0	0	0	0		0	0	0	0	0	0	1	0	0	0	0		0		0
9895	600	10	6	2008	3802	exit			0				tina	4	0	0	0	0	19	0	0	0	0	0	0	0		0	0	0	0	0	0	2	0	0	0	0		0		0
9904	600	11	6	2008	3802	exit			0				tina	3	0	0	0	0	11	0	0	0	0	0	0	0		0	0	0	0	0	0	0	0	0	0	0		0		0
9857	598	12	6	2008	3802	exit			0				tina	7	0	0	0	3	18	0	0	0	0	0	0	0		0	0	0	0	0	0	0	0	1aesdes	0	0		0		0
9874	598	13	6	2008	3802	exit			0				tina	7	0	0	0	0	19	0	0	0	0	0	0	0		0	0	0	0	0	0	1	0	0	0	0		0		0
10220	615	16	6	2008	3802	exit			0				tina	17	0	0	0	2	21	0	0	0	0	0	0	0		0	0	0	0	0	0	0	0	0	0	0		0		0
[truncated: 13,024 more rows]

## Sheet: Weekly means 2003-2006
Week	adjusted rain	Soil Temperature	Air temp	Max Soil	Max Air temp	Min Soil	Min Air temp	Difference Soil	Difference Air	Max Solar	Wind Speed	Af sentinel	Ag sentinel	Af beula	Ag Beula	Af unfed	Af part	Af fed	Af semi	Af gravid	Af gravid/total	Ag unfed	ag part	Ag fed	ag semi	Ag gravid	Ag gravid/total	Af light-trap	Ag light-trap	falciparum pos
1	11.2961	32.438	25.3075	36.7386	29.8014	29.1414	20.8071	7.59714	8.99429	0.554114	0.475726	50	20	31.4167	26.9167	14.5217	0	0	0.357143	7.90373	0.352444	6.91304	0	0	0	13.8913	0.667712	44.6429	7.98571
2	6.92045	30.7966	24.086	34.8	27.7114	27.5429	20.4757	7.25714	7.23571	0.6031	0.704202	49.9	19	34.45	42.1	14.0282	0	0	0.133333	12.6892	0.474941	8.07407	0	0	0	9.42207	0.538523	68.7104	17.1778	112
3	3.82035	32.7731	25.4832	36.4429	29.53	29.6	21.5529	6.84286	7.97714	0.583114	0.64949	18.3333	2	21.4667	35.9333	19.183	0	0	0.0833333	10.1119	0.345176	7.51573	0	0.025641	0	8.12821	0.519575	34.7223	15.5498	131
4	11.0741	31.1628	25.0193	34.3457	28.9329	28.4057	21.2314	5.94	7.70143	0.530971	0.422072	61	18	15.8056	40.4444	15.6613	0	0	0.111111	14.0006	0.472006	12.0408	0	0.0133333	0.0666667	12.4938	0.509233	69.2727	18.7648	109
5	15.1442	30.8564	24.3025	36.0443	29.9486	27.8843	19.4629	8.16	10.4857	0.666743	0.450146	104	57	28.1667	76	5.84	0	0	0.08	20.7733	0.780561	4.605	0	0.7	0	12.79	0.735269	82.8238	26.3021	113
6	8.58831	32.1267	24.4166	34.4814	28.42	28.9614	20.0114	5.52	8.40857	0.569757	0.543537	39	22	14.4583	50.875	5.9875	0.53125	0	0.025	15.9625	0.727221	5.38125	0	0.0125	0.0375	7.9875	0.597475	47.6763	15.397	88
7	7.03734	29.4297	23.5024	33.5114	28.73	26.8829	19.6914	6.62857	9.03857	0.634743	0.438152	89	30	19.25	44.9167	8.18596	0.225877	0.25	0.0416667	21.7241	0.726314	3.96184	0.125	0.0416667	0.0833333	7.37281	0.650466	39.8387	13.5376	78
8	6.31429	31.1979	25.1973	35.1586	30.08	28.46	20.7357	6.69857	9.34429	0.580686	0.507459	53	24	8.75	32.25	6.50425	0.50531	0.145833	0.0208333	26.1134	0.800591	4.83342	0.395833	0.569036	0.0886438	10.793	0.690689	56.3191	9.53899	74
9	20.0786	32.2181	24.2527	36.73	29.7267	29.2683	19.2067	7.46167	10.52	0.635467	0.693765	99.8571	32.2143	12	25.5	14.7373	0.703704	0.185185	0.165862	22.3825	0.60298	7.72171	0.314815	0.351852	0.396135	13.9863	0.644292	37.6393	10.2881	67
10	10.9773	34.1303	25.8775	38.3371	29.6886	31.2471	21.8686	7.09	7.82	0.633257	0.866575	66.3	33.6	26	62	10.1027	0.529412	0.254902	0.76025	36.3494	0.782513	5.20353	0.289661	0.143922	0.215686	13.3676	0.719806	30.4601	15.3983	83
11	17.9383	33.1723	24.9788	37.1229	30.76	30.1671	20.4386	6.95571	10.3214	0.623886	0.51797	120.5	47.45	18.2778	50.3333	7.84504	0.214047	0.0512821	0.102564	31.7894	0.802065	7.003	0.0861823	0.104701	0.16645	10.8591	0.607941	87.5227	25.2015	67
12	3.96472	28.8677	21.9115	32.9986	26.0143	25.13	17.6929	7.86857	8.32143	0.492343	0.508929	86.1667	27.6667	14.75	54.875	4.85697	0.104918	0.133333	0.131165	25.654	0.840812	3.62299	0.171505	0.156452	0.0333333	8.67393	0.705374	49.3097	13.7322	53
13	5.01905	28.229	21.1174	33.2743	27.5386	24.4043	15.4443	8.87	12.0943	0.584343	0.377472	63.1827	30.5385	35.9444	49.6667	7.87201	0.317235	0.126623	0.046131	18.8101	0.704971	5.32697	0.672078	0.191644	0.125	6.53687	0.550991	42.4371	13.0559	51
14	6.47045	28.8834	21.2735	33.4369	27.9531	26.0831	16.3723	7.35385	11.5808	0.625908	0.525835	102.074	34.9444	15.0667	38	10.1474	0.0480769	0.464286	0.0961538	16.903	0.624871	6.31407	0.117293	0.285714	0.0131579	5.22707	0.452908	37.2349	11.0569	58
15	5.68	29.1715	21.5064	33.8621	28.4879	26.4879	16.2514	7.37429	12.2364	0.598721	0.612441	108.637	34.451	43.375	24.25	8.30932	0.713983	0.1875	1.62924	11.8319	0.587447	2.66082	0.191737	0	0.5625	2.63136	0.497216	43.5541	11.5393	69
16	1.83643	27.4758	21.7243	31.5662	28.2587	24.2421	17.1137	7.32417	11.145	0.544346	0.41164	75.9	36.2	22.6667	47	7.16857	0.548373	0.15625	0.645109	13.0685	0.645771	2.61428	0.25	0.125	0	4.00349	0.604961	25.7083	11.7646	64
17	0.707143	27.8735	21.5987	32.6779	28.2718	24.8293	16.8186	7.84857	11.4532	0.545489	0.404928	38	16.0833	20.75	47.25	7.48535	0.4375	0.2375	0.197681	15.1306	0.669023	2.99521	0.0625	0.125	0.75	5.12019	0.630922	34.2112	7.82574	60
18	2.52762	26.1468	20.1381	30.4494	27.4797	23.1012	14.7364	7.34818	12.7433	0.478555	0.323781	71.4545	20.3485	14.6667	10.6667	8.5124	0.0416667	0.541667	0.958333	12.3278	0.59154	1.64719	0.166667	0.333333	0.0891473	1.95174	0.542312	38.2964	9.10679	100
19	0.677857	25.4525	20.158	29.6351	27.2251	22.3914	14.6111	7.24371	12.614	0.442813	0.312335	26.2647	12.8015	28.1667	25.8333	7.13606	0	0.579365	0.527778	8.26785	0.536737	1.50096	0.0714286	0.0277778	0.0714286	1.71096	0.532691	49.9175	6.65185	100
20	0.471429	26.1669	20.8289	30.0571	28.322	22.9234	14.4617	7.13371	13.8603	0.430218	0.307847	22.9333	10.8333	14.6333	10.9667	6.51026	0.0221154	0	0	12.2782	0.653497	0.601923	0.0833333	0.259615	0.846154	1.53429	0.71823	31.1342	4.01081	94
21	1.9	23.2618	17.74	27.2506	25.8763	19.8746	11.124	7.376	14.7523	0.406853	0.221533	34.9231	12.6923	8.75	6.375	5.95525	0.00568182	0.301282	0.0722611	11.9405	0.667225	1.29069	0.0416667	0.111742	0.0681818	0.764269	0.371914	22.972	7.10096	80
22	0.853929	23.2775	18.5803	27.3231	26.5174	20.3971	12.4454	6.926	14.072	0.403346	0.274913	25.2167	8.71667	3.75	6.33333	5.97752	0.254717	0.0833333	0	8.82442	0.596166	2.03784	0.1875	0	0	0.828527	0.289051	38.1508	5.54284	57
23	2.00714	22.8694	18.5554	26.8006	26.1554	20.1194	12.884	6.68114	13.2714	0.36719	0.219429	20.5909	3.09091	23.1786	6.38095	4.45773	0.204887	1.62987	1.26364	11.1975	0.715256	0.796127	0.178571	0	0.0454545	1.80415	0.69383	28.7852	3.18776	43
24	0.745714	21.4077	17.0166	25.0661	24.7948	19.1148	11.7196	5.9513	13.0752	0.298339	0.275175	18.8158	1.55921	22.2067	20.6267	3.82939	0.0416667	0.166667	1.47883	10.3057	0.729087	0.260876	0	0	0	1.13473	0.813074	41.6997	1.80128	53
25	6.66095	21.2796	17.5715	24.451	24.8524	18.8314	12.0186	5.61952	12.8338	0.295249	0.494578	22.6548	1.41667	2.9	3.05	3.60934	0.285714	0.178571	0.892938	6.40668	0.639643	0.555775	0.03125	0	0	0.255376	0.314831	21.0717	1.39824	39
26	12.1952	20.6193	16.7176	23.61	24.0467	17.9333	11.0376	5.67667	13.009	0.299219	0.198946	16.9	1.65	2.16667	1.33333	6.78711	0.117857	0	0.0717391	5.70621	0.456741	0.457298	0	0.05	0	0.853571	0.651149	24.5602	1.29908	35
27	2.02976	20.7777	17.3555	24.071	24.7005	17.9867	11.1467	6.08429	13.5538	0.318417	0.303671	14.3333	0.666667	18.3611	4.52778	2.43041	0.03125	0.21875	0.435662	4.03624	0.624162	0.282563	0	0	0.03125	0.522321	0.64894	23.8281	1.30206	89
28	1.40679	22.324	18.0572	25.6957	25.3252	19.2552	11.25	6.44048	14.0752	0.323784	0.280206	8.27778	0.5	8.08333	2.70833	3.95	0.625	0.0416667	0.291667	6.27083	0.613534	0.5625	0.0625	0	0	0.3125	0.357143	27.1534	1.9905	83
29	2.72845	21.3982	15.8775	25.5076	25.0367	18.7062	9.58905	6.80143	15.4476	0.33017	0.164419	4.33333	0.416667	16.5167	3.25	2.23542	0	0	0.03125	6.02083	0.729246	0.19375	0	0	0	0.1375	0.415094	30.4283	2.25682	80
30	0.930357	21.8944	16.7628	25.8424	24.8067	19.0757	10.1343	6.76667	14.6724	0.351482	0.176136	15.5	0.6875	17.4524	3.02381	2.02321	0	0	0.565774	3.30476	0.620266	0.13125	0	0	0	0.0979167	0.427273	28.6321	1.3058	95
31	0.372976	23.0084	18.0818	26.8495	26.3986	19.7767	10.7195	7.07286	15.679	0.356251	0.246214	22.9821	2.05357	28.125	6.4375	3.515	0	0	0.801667	5.77833	0.621772	0.31	0.0416667	0	0	0.376667	0.548544	44.5216	2.93688	56
32	0.888571	23.7629	18.0795	27.7586	26.1767	20.4138	11.1067	7.34476	15.07	0.362728	0.231571	19.1905	1.72619	18.3667	3.66667	3.35833	0	0	1.26667	3.29167	0.494987	0.441667	0	0.05	0	0.0833333	0.15873	50.8875	2.388	72
33	0.352143	24.5673	18.8262	28.5314	26.3329	21.6933	12.6076	6.8381	13.7252	0.361356	0.419931	8.11765	0.764706	31.1389	3.97222	4.46379	0.316964	0.375	2.58929	6.56746	0.595351	0.234127	0	0	0.1875	0.513889	0.687003	68.2731	2.30018	49
34	0.148214	24.6743	18.5485	28.6248	24.8619	21.701	13.1857	6.92381	11.6762	0.365558	0.409036	16.8667	2.53333	15.5	11	5.95176	0.3275	0.0625	0.388382	7.67325	0.563174	0.407289	0.03125	0.0227273	0.0227273	0.545303	0.572441	33.451	1.36687	32
35	0.0361905	25.8693	19.6797	29.9362	26.68	22.2748	12.7705	7.66143	13.9095	0.405682	0.68176	18.2308	3.61538	15.2083	2.625	8.4752	0.05	0	0.833333	10.0642	0.542855	0.337195	0	0	0	0.308333	0.477645	51.25	4.40305	35
36	0.4525	26.4709	19.895	30.5038	26.1129	23.0419	12.96	7.4619	13.1529	0.403558	0.499806	17.4444	1.88889	21.7917	4	6.67065	0.25	0.1	1.05	10.1272	0.602886	0.216304	0.15	0.00543478	0	0.61087	0.738502	36.3785	1.73929	31
37	0.690119	26.8471	19.9717	31.2562	25.9386	23.2014	13.7076	8.05476	12.231	0.433481	0.686482	15.7	1.4	11	2.25	12.6595	0	0.875	0.0714286	11.6931	0.480159	0.455774	0	0	0	0.809524	0.639789	40.5487	2.25373	60
38	0.199167	27.0779	19.7775	32.1941	27.0535	23.4582	13.16	8.73588	13.8935	0.41659	0.798481	34.1818	2.81818	15.7778	7.77778	7.87475	0.114286	0.0333333	1.63333	8.99697	0.533257	1.41429	0.0666667	0	0.133333	1.00317	0.41497	32.046	1.92029	66
39	0.448929	28.0236	20.9478	31.8892	27.3662	24.9538	15.8177	6.93538	11.5485	0.367194	1.39578	46.8333	5.33333	21.5278	5.97222	7.84127	0.121212	0.636364	0.030303	10.3824	0.56972	1.45599	0	0.151515	0	0.748918	0.33966	66.9875	3.03744	62
40	0.0902098	29.2795	22.0397	33.1957	26.91	26.6829	17.7057	6.51286	9.20429	0.4918	0.848664	12.4	1.4	24.25	17.4167	5.75767	0.037037	0.148148	0.142857	9.98042	0.634157	1.1463	0.037037	0.037037	0	2.07169	0.643785	42.662	2.30331	17
41	1.01948	29.9648	22.1957	33.6414	27.7057	26.3343	16.73	7.30714	10.9757	0.519529	0.813093	10.25	2.5	26.7333	21.0667	5.78194	0.305556	0.688889	0.0638889	14.3944	0.71343	1.61319	0.2	0	0	3.08403	0.656564	36.0569	4.386	12
42	2.63377	31.6974	23.9101	36.3629	30.8971	27.5714	19.27	8.79143	11.6271	0.643543	0.918852	20.3333	0.833333	32.5	13.375	16.9139	0.0675676	0.101351	0.173423	17.9432	0.514766	0.482482	0.037037	0	0	1.36962	0.739495	61.3867	5.78191	13
43	0.157576	30.8238	21.9198	34.0686	26.1471	27.6729	17.2829	6.39571	8.86429	0.531329	0.799992	26.4	4.4	22.4	14.85	10.0067	0.0462838	0.619595	0.0277778	24.7666	0.71223	0.901014	0.0345345	0.175	0	2.33296	0.721391	49.0706	5.81966	7
44	2.5987	29.3384	21.4517	33.9157	26.0586	26.2914	16.5229	7.62429	9.53571	0.577586	1.05819	77.5	2	28.3958	18.5208	13.4688	0.305995	0.106618	0	16.9215	0.556806	0.664423	0.0625	0.125	0.00735294	1.24101	0.6513	37.3127	3.41875	8
45	5.21136	31.2132	23.7373	33.518	26.703	28.589	20.832	4.929	5.871	0.39248	1.26899	47.4545	1.63636	49.9167	45.875	10.2278	0.0555556	0.0843816	0.333333	11.9481	0.538788	0.880907	0	0.0277778	0.125	1.10486	0.556389	61.7368	5.46917	21
46	12.3692	30.9189	23.6933	35.2721	28.5036	28.0657	19.4857	7.20643	9.01786	0.591636	1.06373	28.9167	1.58333	21.4833	21.95	9.43468	0.0260557	0.0522496	0.177036	12.7236	0.574214	1.39606	0.0384615	0	0.0707283	2.0829	0.598714	59.5548	13.9036	55
47	4.62868	30.9442	23.7043	34.0229	27.6329	28.1	19.3807	5.92286	8.25214	0.5805	0.9749	27	4.57143	22.7083	23.125	11.2356	0.0738636	0.0458333	0.147727	14.9996	0.571736	1.52955	0.0609848	0.0189394	0.00757576	1.97576	0.563648	48.2198	8.5485	54
48	5.48918	30.5412	23.1212	34.8289	27.5367	27.8022	18.0289	7.02667	9.50778	0.657422	0.972856	17.75	9.3125	23.7708	43.5208	10.8542	0.0168919	0.0192308	0.18274	10.5921	0.49389	1.99344	0.0202703	0	0.0101351	2.26208	0.531564	43.7584	11.3893	45
49	18.1212	30.3213	24.381	31.9	27.9443	27.7671	21.4057	4.13286	6.53857	0.443729	0.873643	21	3	38.4	69.3556	12.7818	0.0485328	0.0636364	0.141053	12.7179	0.498747	2.91493	0.0316456	0.00454545	0.00949367	3.56422	0.550106	32.7871	10.0279	17
50	4.56234	30.395	25.5291	34.5971	29.8914	28.6671	22.5143	5.93	7.37714	0.584343	0.67601	54	8	35.625	52.875	14.4014	0.0800395	0.0340909	0.269022	10.2114	0.414881	6.52862	0.0412549	0.105978	0.0647157	4.23506	0.393459	68.4763	23.4722	41
51	7.73777	29.8816	24.4723	32.1986	27.7443	27.4786	21.0229	4.72	6.72143	0.390843	0.631787	51.2917	30	41.3833	63.1333	17.2089	0	0.0272727	0.179487	10.2223	0.372652	6.75089	0	0.109732	0	4.43096	0.396263	70.9958	16.8284	41
52	47.519	31.7379	24.7411	36.9614	29.7043	28.3543	19.2571	8.60714	10.4471	0.631429	0.57173	50	25	48.75	60.8333	8.70115	0	0	0.0344828	18.7471	0.682998	6.3908	0	0.0517241	0	9.06897	0.586617	52.25	28.3333
